# Supplementary material for: Reductive Cleavage Method for Quantitation of Monolignols and Low‐Abundance Monolignol Conjugates
Source: PubMed Central journal article supplement — ChemSusChem. 2018 May 9;11(10):1600–5. doi: 10.1002/cssc.201800617 (PMC6001451; doi:10.1002/cssc.201800617), 2018-05-09

## Supporting Information

### **Reductive Cleavage Method for Quantitation of Monolignols and Low-Abundance Monolignol Conjugates**

Matt Regner,<sup>[a, b]</sup> Allison Bartuce,<sup>[a]</sup> Dharshana Padmakshan,<sup>[a]</sup> John Ralph,<sup>[a, b]</sup> and Steven D. Karlen<sup>\*[a, b]</sup>

csc\_201800617\_sm\_miscellaneous\_information.pdf

|                                                                                            |     |
|--------------------------------------------------------------------------------------------|-----|
| Experimental Section                                                                       | S2  |
| General Information                                                                        | S2  |
| Scheme 1 – Synthesis of $\gamma$ -acylated $\beta$ -ether model compounds                  | S2  |
| Synthesis of $\gamma$ -OH $\beta$ -O-4 dimers                                              | S3  |
| Synthesis of $\gamma$ -acylated $\beta$ -O-4 dimers                                        | S5  |
| Procedure for reduction of $\alpha$ -ketone                                                | S10 |
| Procedure for deprotection of phenolic acetates                                            | S10 |
| Procedure for the preparation of acetylated benzoic and cinnamic acids                     | S19 |
| Procedure for the preparation of deuterioacetylated benzoic and cinnamic acids             | S19 |
| Procedure for the sidechain saturation and deuteration of cinnamic acids                   | S20 |
| Procedure for the preparation of acid chlorides                                            | S21 |
| Procedure for the preparation of monolignols and $\gamma,\gamma$ -dideuterated monolignols | S21 |
| Procedure for the synthesis of natural abundance monolignol conjugates                     | S22 |
| Procedure for the synthesis of octa/deca-deuterated monolignol conjugates                  | S24 |
| Figure S1 – Kinetic data for DFRC optimization on corn stover                              | S27 |
| Table S1 - Chromatography program for GC/MS/MS characterization                            | S28 |
| Table S2 - MRM parameters for GC/MS/MS characterization                                    | S29 |
| Table S3 - MRM parameters for GC/MS quantitation of DFRC product mix                       | S30 |
| References                                                                                 | S31 |
| Figures S2-S4 - $^1\text{H}$ NMR spectra for quantitation of unsaturated conjugates        | S32 |
| $^1\text{H}$ and $^{13}\text{C}$ NMR Spectra                                               | S35 |

## Experimental Section

### General Information

All commercially purchased reagents and solvents were used as received unless otherwise indicated. Flash column chromatography was performed on either a Teledyne Isco RediSep® Rf or Biotage Isolera™ One system using Silica 60 M (0.04 – 0.063 mm) supplied by Macherey-Nagel. Thin-layer chromatographic analysis was conducted using pre-coated TLC sheets ALUGRAM® SIL G/UV<sub>254</sub> supplied by Macherey-Nagel. <sup>1</sup>H, <sup>13</sup>C, HSQC, HMBC, and COSY NMR experiments were all collected on a Bruker Biospin (Billerica, MA, USA) AVANCE 500 or 700 MHz spectrometer (Billerica, MA, USA) fitted with a cryogenically-cooled 5-mm QCI (<sup>1</sup>H/<sup>31</sup>P/<sup>13</sup>C/<sup>15</sup>N) gradient probe with inverse geometry (proton coils closest to the sample). High-resolution mass spectra (HRMS) were collected in the University of Wisconsin-Madison Department of Chemistry Mass Spectrometry Lab on a Thermo Q Exactive™ Plus.

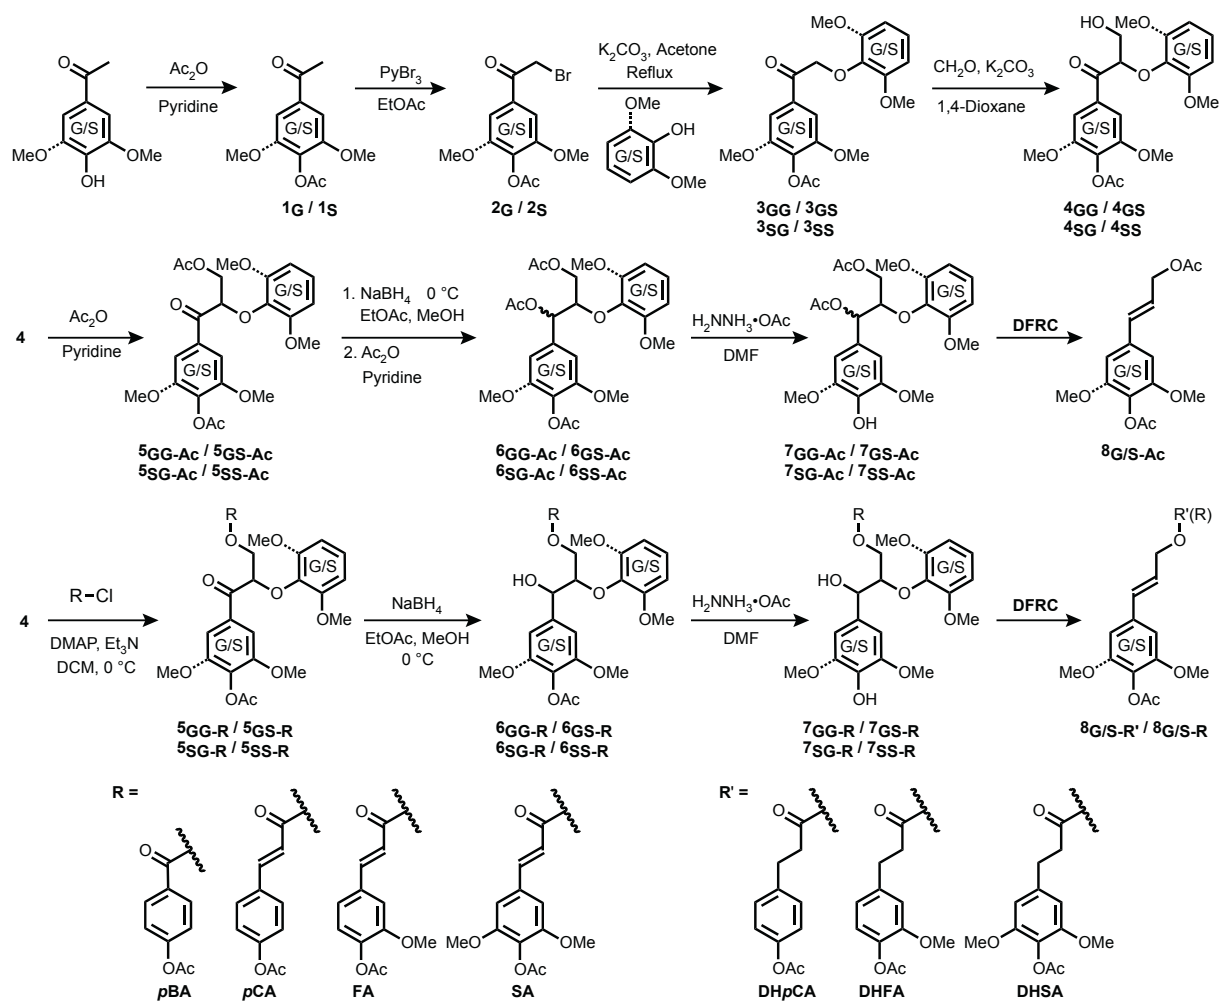

**Scheme 1** Detailed synthesis of the  $\beta$ -ether dimers used to determine DFRC yields. Abbreviations correspond to  $\gamma$ -acylating acids: **pBA** for *p*-hydroxybenzoic acid; **pCA** for *p*-coumaric acid; **FA** for ferulic acid; **SA** for sinapic acid. **DH** stands for "dihydro," denoting products that have been hydrogenated across the double bond in the DFRC process.

**Synthesis of  $\gamma$ -OH  $\beta$ -O-4 dimers:** Compounds **1<sub>G</sub>**/**1<sub>S</sub>** through **4<sub>GGOH</sub>**/**4<sub>GSOH</sub>**/**4<sub>SGOH</sub>**/**4<sub>SSOH</sub>** were synthesized as previously reported.<sup>1-4</sup>

**1<sub>G</sub>** (11.2 g, 90%), white crystalline solid: <sup>1</sup>H NMR (CDCl<sub>3</sub>)  $\delta$  7.59 (s, 1H, 2), 7.55 (d, J = 8.2 Hz, 1H, 5), 7.12 (dd, J = 8.2, 1.1 Hz, 1H, 6), 3.88 (s, 3H, OMe), 2.59 (s, 3H,  $\beta$ ), 2.33 (s, 3H, OAc); <sup>13</sup>C NMR (CDCl<sub>3</sub>)  $\delta$  197.1 ( $\alpha$ ), 168.7 (OAc), 151.5 (3), 143.9 (4), 136.0 (1), 122.9 (6), 122.1 (5), 111.5 (2), 56.1 (OMe), 26.7 ( $\beta$ ), 20.8 (OAc); HRMS(ESI) *m/z* calcd for [M+H]<sup>+</sup> = 209.0809, meas. 209.0814.

**1<sub>S</sub>** (11.0 g, 91%), pale yellow crystalline solid: <sup>1</sup>H NMR (CDCl<sub>3</sub>)  $\delta$  7.23 (s, 2/6), 3.89 (s, 6H, OMe), 2.61 (s, 3H,  $\beta$ ), 2.36 (s, 3H, OAc); <sup>13</sup>C NMR (CDCl<sub>3</sub>)  $\delta$  197.0 ( $\alpha$ ), 168.4 (OAc), 152.4 (3/5), 135.3 (1), 132.9 (4), 105.2 (2/6), 56.5 (OMe), 26.7 ( $\beta$ ), 20.6 (OAc); HRMS(ESI) *m/z* calcd for [M+NH<sub>4</sub>]<sup>+</sup> = 256.1180, meas. 256.1180.

**2<sub>G</sub>** (12.3 g, 79%), white crystalline solid: <sup>1</sup>H NMR (CDCl<sub>3</sub>)  $\delta$  7.63 (d, J = 1.9 Hz, 1H, 2<sub>A</sub>), 7.58 (dd, J = 8.2, 1.9 Hz, 1H, 6<sub>A</sub>), 7.16 (d, J = 8.2 Hz, 1H, 5<sub>A</sub>), 4.43 (s, 2H,  $\beta$ ), 3.90 (s, 3H, OMe<sub>A</sub>), 2.35 (s, 3H, OAc<sub>A</sub>); <sup>13</sup>C NMR (CDCl<sub>3</sub>)  $\delta$  190.4 ( $\alpha$ ), 168.5 (OAc), 151.8 (3), 144.6 (4), 132.8 (1), 123.2 (5), 122.5 (6), 112.4 (2), 56.3 (OMe), 30.6 ( $\beta$ ), 20.8 (OAc); HRMS(ESI) *m/z* calcd for [M+NH<sub>4</sub>]<sup>+</sup> = 304.0179, meas. 304.0175.

**2<sub>S</sub>** (9.2 g, 63%), pale yellow crystalline solid: <sup>1</sup>H NMR (CDCl<sub>3</sub>)  $\delta$  7.25 (s, 1H, 2/6<sub>A</sub>), 4.42 (s, 2H,  $\beta$ ), 3.89 (s, 6H, OMe<sub>A</sub>), 2.36 (s, 3H, OAc<sub>A</sub>); <sup>13</sup>C NMR (CDCl<sub>3</sub>)  $\delta$  ; HRMS(ESI) *m/z* calcd for [M+NH<sub>4</sub>]<sup>+</sup> = 334.0285, meas. 334.0289.

**3<sub>GG</sub>** (15.9 g, 79%), colorless oil: <sup>1</sup>H NMR (CDCl<sub>3</sub>)  $\delta$  7.68 (d, J = 1.8 Hz, 1H, 2<sub>A</sub>), 7.63 (dd, J = 8.2, 1.9 Hz, 1H, 6<sub>A</sub>), 7.14 (d, J = 8.2 Hz, 1H, 5<sub>A</sub>), 6.98 (ddd, J = 8.1, 6.9, 2.0 Hz, 1H, 1<sub>B</sub>), 6.92 (dd, J = 8.1, 1.4 Hz, 1H, 2<sub>B</sub>), 6.86 (td, J = 7.5, 1.6 Hz, 1H, 6<sub>B</sub>), 6.83 (dd, J = 8.0, 2.0 Hz, 1H, 5<sub>B</sub>), 5.32 (s, 2H,  $\beta$ ), 3.89 (s, 3H, OMe<sub>A</sub>), 3.88 (s, 3H, OMe<sub>B</sub>), 2.34 (s, 3H, OAc); <sup>13</sup>C NMR (CDCl<sub>3</sub>)  $\delta$  193.7 ( $\alpha$ ), 168.6 (OAc), 151.8 (3<sub>A</sub>), 149.8 (3<sub>B</sub>), 147.5 (4<sub>B</sub>), 144.4 (4<sub>A</sub>), 133.4 (1<sub>A</sub>), 123.2 (5<sub>A</sub>), 122.7 (1<sub>B</sub>), 121.5 (6<sub>A</sub>), 120.9 (6<sub>B</sub>), 114.9 (5<sub>B</sub>), 112.2 (2<sub>B</sub>), 111.9 (2<sub>A</sub>), 72.2 ( $\beta$ ), 56.2 (OMe), 56.0 (OMe), 20.8 (OAc); HRMS(ESI) *m/z* calcd for [M+H]<sup>+</sup> = 331.1177, meas. 331.1172.

**3<sub>GS</sub>** (10.9 g, 71%), white solid: <sup>1</sup>H NMR (CDCl<sub>3</sub>)  $\delta$  7.71 (d, J = 1.9 Hz, 1H, 2<sub>A</sub>), 7.64 (dd, J = 8.2, 1.9 Hz, 1H, 6<sub>A</sub>), 7.10 (d, J = 8.2 Hz, 1H, 5<sub>A</sub>), 6.99 (t, J = 8.4 Hz, 1H, 1<sub>B</sub>), 6.56 (d, J = 8.4 Hz, 2H, 2<sub>B</sub>/6<sub>B</sub>), 5.16 (s, 2H,  $\beta$ ), 3.87 (s, 3H, OMe<sub>A</sub>), 3.78 (s, 6H, OMe<sub>B</sub>), 2.31 (s, 3H, OAc<sub>A</sub>); <sup>13</sup>C NMR (CDCl<sub>3</sub>)  $\delta$  194.0 ( $\alpha$ ), 168.5 (OAc), 153.2 (3<sub>B</sub>), 151.4 (3<sub>A</sub>), 143.9 (4<sub>A</sub>), 136.4 (4<sub>B</sub>), 133.9 (1<sub>A</sub>), 124.2 (1<sub>B</sub>), 122.8 (5<sub>A</sub>), 121.6 (6<sub>A</sub>), 112.0 (2<sub>A</sub>), 105.2 (2<sub>B</sub>/6<sub>B</sub>), 75.3 ( $\gamma$ ), 56.1 (OMe<sub>A</sub>), 56.0 (OMe<sub>B</sub>), 20.7 (OAc); HRMS(ESI) *m/z* calcd for [M+H]<sup>+</sup> = 361.1282, meas. 361.1273.

**3<sub>SG</sub>** (2.74 g, 76%), white solid: <sup>1</sup>H NMR (CDCl<sub>3</sub>) δ 7.34 (s, 2H, 2/6<sub>A</sub>), 7.00-6.96 (m, 1H, 1<sub>B</sub>), 6.92 (dd, J = 8.1, 1.1 Hz, 1H, 2<sub>B</sub>), 6.89-6.83 (m, 2H, 5<sub>B</sub>/6<sub>B</sub>), 5.28 (s, 2H, β), 3.88 (s, 9H, OMe), 2.36 (s, 3H, OAc<sub>A</sub>); <sup>13</sup>C NMR (CDCl<sub>3</sub>) δ 193.9 (α), 168.3 (OAc<sub>A</sub>), 152.5 (3<sub>A</sub>/5<sub>A</sub>), 149.8 (3<sub>B</sub>), 147.4 (4<sub>B</sub>), 133.4 (4<sub>A</sub>), 132.6 (1<sub>A</sub>), 122.8 (1<sub>B</sub>), 121.0 (6<sub>B</sub>), 114.8 (5<sub>B</sub>), 112.2 (2<sub>B</sub>), 105.3 (2<sub>A</sub>/6<sub>A</sub>), 72.6 (β), 56.5 (OMe<sub>A</sub>), 55.9 (OMe<sub>B</sub>), 20.6 (OAc<sub>A</sub>); HRMS (ESI) *m/z* calcd for [M+H]<sup>+</sup> = 361.1282, meas. 361.1286.

**3<sub>SS</sub>** (2.75 g, 71%), white solid: <sup>1</sup>H NMR (CDCl<sub>3</sub>) δ 7.38 (s, 2H, 2<sub>A</sub>/6<sub>A</sub>), 7.03 (t, J = 8.4 Hz, 1H, 1<sub>B</sub>), 6.59 (d, J = 8.4 Hz, 2H, 2<sub>B</sub>/6<sub>B</sub>), 5.14 (s, 2H, β), 3.88 (s, 6H, OMe<sub>A</sub>), 3.81 (s, 6H, OMe<sub>B</sub>), 2.36 (s, 3H, OAc<sub>A</sub>); <sup>13</sup>C NMR (CDCl<sub>3</sub>) δ 194.1 (α), 168.4 (OAc<sub>A</sub>), 153.4 (3<sub>B</sub>/5<sub>B</sub>), 152.4 (3<sub>A</sub>/5<sub>A</sub>), 136.4 (4<sub>B</sub>), 133.2 (4<sub>A</sub>), 133.1 (1<sub>A</sub>), 124.4 (1<sub>B</sub>), 105.5 (2<sub>A</sub>/6<sub>A</sub>), 105.3 (2<sub>B</sub>/6<sub>B</sub>), 75.6 (β), 56.5 (OMe<sub>A</sub>), 56.2 (OMe<sub>B</sub>), 20.6 (OAc<sub>A</sub>); HRMS (ESI) *m/z* calcd for [M+Na]<sup>+</sup> = 413.1207, meas. 413.1199.

**4<sub>GGOH</sub>** (10.6 g, 61%), off-white solid: <sup>1</sup>H NMR (CDCl<sub>3</sub>) δ 7.71-7.68 (m, 2H, 2<sub>A</sub>/6<sub>A</sub>), 7.13 (d, J = 8.5 Hz, 1H, 5<sub>A</sub>), 7.02 (td, J = 7.8, 1.2 Hz, 1H, 6<sub>B</sub>), 6.93-6.89 (m, 2H, 2<sub>B</sub>/5<sub>B</sub>), 6.84 (td, J = 7.8, 1.4 Hz, 1H, 5<sub>B</sub>), 5.41 (dd, J = 4.2, 6.2 Hz, 1H, β), 4.11-4.05 (m, 2H, γ), 3.87 (s, 3H, OMe<sub>A</sub>), 3.85 (s, 3H, OMe<sub>B</sub>), 3.02 (s, 1H, OH), 2.33 (s, 3H, OAc<sub>A</sub>); <sup>13</sup>C NMR (CDCl<sub>3</sub>) δ 195.5 (α), 168.6 (OAc<sub>A</sub>), 151.7 (3<sub>A</sub>), 150.6 (3<sub>B</sub>), 146.9 (4<sub>B</sub>), 144.5 (4<sub>A</sub>), 133.7 (1<sub>A</sub>), 124.0 (6<sub>B</sub>), 123.1 (5<sub>A</sub>), 122.3 (6<sub>A</sub>), 121.3 (1<sub>B</sub>), 118.9 (2<sub>B</sub>), 112.5 (2<sub>A</sub>), 112.4 (5<sub>B</sub>), 84.9 (β), 63.6 (γ), 56.2 (OMe<sub>A</sub>), 55.9 (OMe<sub>B</sub>), 20.8 (OAc<sub>A</sub>); HRMS (ESI) *m/z* calcd for [M+H]<sup>+</sup> = 361.1282, meas. 361.1284.

**4<sub>GSOH</sub>** (6.1 g, 52%), brittle white foam: <sup>1</sup>H NMR (CDCl<sub>3</sub>) δ 7.74 (d, J = 1.8 Hz, 1H, 2<sub>A</sub>), 7.69 (dd, J = 8.2, 1.9 Hz, 1H, 6<sub>A</sub>), 7.11 (d, J = 8.2 Hz, 1H, 5<sub>A</sub>), 7.03 (t, J = 8.4 Hz, 1H, 1<sub>B</sub>), 6.58 (d, J = 8.4 Hz, 2H, 2<sub>B</sub>/6<sub>B</sub>), 5.09 (dd, J = 7.5, 3.1 Hz, 1H, β), 4.01 (dd, J = 12.0, 7.5 Hz, 1H, γ), 3.89 (s, 3H, OMe<sub>A</sub>), 3.73 (s, 6H, OMe<sub>B</sub>), 3.83 (dd, J = 7.5, 3.1 Hz, 1H, γ), 2.33 (s, 3H, OAc<sub>A</sub>); <sup>13</sup>C NMR (CDCl<sub>3</sub>) δ 195.6 (α), 168.6 (OAc<sub>A</sub>), 152.8 (3<sub>B</sub>/5<sub>B</sub>), 151.5 (3<sub>A</sub>), 144.0 (4<sub>A</sub>), 136.5 (1<sub>B</sub>), 134.4 (1<sub>A</sub>), 124.6 (1<sub>B</sub>), 122.9 (5<sub>A</sub>), 122.2 (6<sub>A</sub>), 112.5 (2<sub>A</sub>), 105.3 (2<sub>B</sub>/6<sub>B</sub>), 87.8 (β), 63.5 (γ), 56.2 (OMe<sub>A</sub>), 56.1 (OMe<sub>B</sub>), 20.9 (OAc<sub>A</sub>); HRMS (ESI) *m/z* calcd for [M+Na]<sup>+</sup> = 413.1207, meas. 413.1212.

**4<sub>SGOH</sub>** (2.28 g, 77%), brittle white foam: <sup>1</sup>H NMR (CDCl<sub>3</sub>) δ 7.37 (s, 2H, 2<sub>A</sub>/6<sub>A</sub>), 7.02 (td, J = 7.8, 1.2 Hz, 1H, 1<sub>B</sub>), 6.92 (dd, J = 8.1, 1.2 Hz, 1H, 2<sub>B</sub>), 6.91 (dd, J = 8.0, 1.5 Hz, 1H, 5<sub>B</sub>), 6.85 (td, J = 7.7, 1.2 Hz, 1H, 6<sub>B</sub>), 5.36 (dd, J = 5.8, 4.8 Hz, 1H, β), 4.09 (s, 2H, γ), 3.84 (s, 9H, OMe<sub>A/B</sub>), 2.94 (s, 1H, OH), 2.35 (s, 3H, OAc<sub>A</sub>); <sup>13</sup>C NMR (CDCl<sub>3</sub>) δ 195.8 (α), 168.3 (OAc<sub>A</sub>), 152.5 (3<sub>A</sub>/5<sub>A</sub>), 150.6 (3<sub>B</sub>), 146.8 (4<sub>B</sub>), 133.5 (4<sub>A</sub>), 132.9 (1<sub>A</sub>), 124.0 (1<sub>B</sub>), 121.4 (6<sub>B</sub>), 118.6 (5<sub>B</sub>), 112.4 (2<sub>B</sub>), 105.9 (2<sub>A</sub>/6<sub>A</sub>), 84.8 (β), 63.6 (γ), 56.5 (OMe<sub>A</sub>), 55.9 (OMe<sub>B</sub>), 20.6 (OAc<sub>A</sub>); HRMS (ESI) *m/z* calcd for [M+NH<sub>4</sub>]<sup>+</sup> = 408.1653, meas. 408.1659.

**4<sub>SSOH</sub>** (2.25g, 77%), sticky white foam: <sup>1</sup>H NMR (CDCl<sub>3</sub>) δ 7.39 (s, 2H, 2<sub>A</sub>/6<sub>A</sub>), 7.04 (t, J = 8.4 Hz, 1H, 1<sub>B</sub>), 6.59 (d, J = 8.4 Hz, 2H, 2<sub>B</sub>/6<sub>B</sub>), 5.09 (dd, J = 7.4, 3.2 Hz, 1H, β), 4.03 (ddd, J = 11.9, 7.4, 4.5 Hz, 1H, γ), 3.94 (dd, J = 9.0, 4.4 Hz, 1H, OH), 3.86 (s, 6H, OMe<sub>A</sub>), 3.82 (dd, J = 9.0, 3.1 Hz, 1H, γ), 3.75 (s, 6H, OMe<sub>B</sub>), 2.36 (s, 3H, OAc<sub>A</sub>); <sup>13</sup>C NMR (CDCl<sub>3</sub>) δ 195.6 (α), 168.3 (OAc<sub>A</sub>), 152.9 (3<sub>B</sub>/5<sub>B</sub>), 152.3 (3<sub>A</sub>), 136.4 (4<sub>B</sub>), 133.6 (4<sub>A</sub>), 133.1 (1<sub>A</sub>), 124.6 (1<sub>B</sub>), 105.9 (2<sub>A</sub>/6<sub>A</sub>), 105.3 (2<sub>B</sub>/6<sub>B</sub>), 87.5 (β), 63.4 (γ), 56.5 (OMe<sub>A</sub>), 56.1 (OMe<sub>B</sub>), 20.6 (OAc<sub>A</sub>); HRMS (ESI) *m/z* calcd for [M+H]<sup>+</sup> = 421.1494, meas. 421.1494.

**Synthesis of γ-acylated β-O-4 dimers:** β-O-4 dimer conjugates (*p*-acetoxybenzoates, *p*-coumarates, ferulates, and sinapates) **5<sub>GGpBA</sub>**–**5<sub>SSSA</sub>** were synthesized as reported previously from the corresponding β-ether dimer intermediates **4<sub>GG</sub>**–**4<sub>SS</sub>** and acid chlorides.<sup>5-6</sup>

**5<sub>GG-pBA</sub>** (569 mg, 78%), white foam: <sup>1</sup>H NMR (CDCl<sub>3</sub>) δ 7.97 (d, J = 8.7 Hz, 2H, 2<sub>C</sub>/6<sub>C</sub>), 7.87 (dd, J = 8.3, 1.9 Hz, 1H, 6<sub>A</sub>), 7.82 (d, J = 1.8 Hz, 1H, 2<sub>A</sub>), 7.14 (d, J = 8.7, 3H, 3<sub>C</sub>/5<sub>C</sub>/5<sub>A</sub>), 7.00-6.96 (m, 2H, 1<sub>B</sub>/5<sub>B</sub>), 6.86 (dd, J = 8.4, 1.3 Hz, 2<sub>B</sub>), 6.82 (td, J = 7.7, 1.5 Hz, 1H, 6<sub>B</sub>), 5.74 (dd, J = 7.0, 3.7 Hz, 1H, β), 4.92 (dd, J = 11.9, 3.7 Hz, 1H, γ), 4.71 (dd, J = 11.9, 7.0 Hz, 1H, γ), 3.88 (s, 3H, OMe<sub>A</sub>), 3.68 (s, 3H, OMe<sub>B</sub>), 2.34 (s, 3H, OAc<sub>C</sub>), 2.32 (s, 3H, OAc<sub>A</sub>); <sup>13</sup>C NMR (CDCl<sub>3</sub>) δ 194.8 (α), 169.0 (OAc<sub>A</sub>), 168.5 (OAc<sub>C</sub>), 165.7 (9), 154.7 (4<sub>C</sub>), 151.6 (3<sub>A</sub>), 150.6 (3<sub>B</sub>), 146.8 (4<sub>B</sub>), 144.5 (4<sub>A</sub>), 133.8 (1<sub>A</sub>), 131.5 (2<sub>C</sub>/6<sub>C</sub>), 127.2 (1<sub>C</sub>), 123.9 (1<sub>B</sub>), 123.2 (5<sub>A</sub>), 122.6 (6<sub>A</sub>), 121.8 (3<sub>C</sub>/5<sub>C</sub>), 121.1 (6<sub>B</sub>), 119.1 (5<sub>B</sub>), 112.7 (2<sub>A</sub>), 112.6 (2<sub>B</sub>), 80.9 (β), 65.2 (γ), 56.2 (OMe<sub>A</sub>), 55.7 (OMe<sub>B</sub>), 21.3 (OAc<sub>C</sub>), 20.8 (OAc<sub>A</sub>); HRMS (ESI) *m/z* calcd for [M+NH<sub>4</sub>]<sup>+</sup> = 540.1865, meas 540.1852.

**5<sub>GG-pCA</sub>** (593 mg, 77%), white foam: <sup>1</sup>H NMR (CDCl<sub>3</sub>) δ 7.85 (dd, J = 8.3, 1.9 Hz, 1H, 6<sub>A</sub>), 7.81 (d, J = 1.8 Hz, 1H, 2<sub>A</sub>), 7.62 (d, J = 16.0 Hz, 1H, 7), 7.51 (d, J = 8.5 Hz, 2H, 2<sub>C</sub>/6<sub>C</sub>), 7.15 (d, J = 8.2 Hz, 1H, 5<sub>A</sub>), 7.12 (d, J = 8.5 Hz, 2H, 3<sub>C</sub>/5<sub>C</sub>), 7.00-6.96 (m, 2H, 1<sub>B</sub>/5<sub>B</sub>), 6.87 (d, J = 7.5 Hz, 1H, 2<sub>B</sub>), 6.83 (td, J = 7.7, 1.4 Hz, 1H, 6<sub>B</sub>), 6.38 (d, J = 16.0 Hz, 8), 5.71 (dd, J = 7.1, 3.7 Hz, 1H, β), 4.84 (dd, J = 12.0, 3.6 Hz, 1H, γ), 4.60 (dd, J = 11.9, 7.1 Hz, 1H, γ), 3.89 (s, 3H, OMe<sub>A</sub>), 3.74 (s, 3H, OMe<sub>B</sub>), 2.34 (s, 3H, OAc<sub>A</sub>), 2.32 (s, 3H, OAc<sub>C</sub>); <sup>13</sup>C NMR (CDCl<sub>3</sub>) δ 194.7 (α), 169.3 (OAc<sub>C</sub>), 168.5 (OAc<sub>A</sub>), 166.8 (9), 152.4 (4<sub>C</sub>), 151.6 (3<sub>A</sub>), 150.6 (3<sub>B</sub>), 146.8 (4<sub>B</sub>), 144.7 (7), 144.5 (4<sub>A</sub>), 133.7 (1<sub>A</sub>), 132.0 (1<sub>C</sub>), 129.5 (2<sub>C</sub>/6<sub>C</sub>), 123.9 (1<sub>B</sub>), 123.2 (5<sub>A</sub>), 122.6 (6<sub>A</sub>), 122.3 (3<sub>C</sub>/5<sub>C</sub>), 121.1 (6<sub>B</sub>), 118.9 (5<sub>B</sub>), 117.5 (8), 112.7 (2<sub>A</sub>), 112.6 (2<sub>B</sub>), 80.8 (β), 64.7 (γ), 56.2 (OMe<sub>A</sub>), 55.8 (OMe<sub>B</sub>), 21.3 (OAc<sub>C</sub>), 20.8 (OAc<sub>A</sub>); HRMS (ESI) *m/z* calcd for [M+NH<sub>4</sub>]<sup>+</sup> = 566.2021, meas 566.2032.

**5<sub>GG-FA</sub>** (429 mg, 53%), white foam: <sup>1</sup>H NMR (CDCl<sub>3</sub>) δ 7.85 (dd, J = 8.3, 1.8 Hz, 1H, 6<sub>A</sub>), 7.81 (d, J = 1.8 Hz, 1H, 2<sub>A</sub>), 7.60 (d, J = 16.0 Hz, 1H, 7), 7.15 (d, J = 8.3 Hz, 1H, 5<sub>A</sub>), 7.09 (dd, J = 8.1, 1.6 Hz, 1H, 6<sub>C</sub>), 7.07 (d, J = 1.4 Hz, 1H, 2<sub>C</sub>), 7.05 (d, J = 8.1 Hz, 1H, 5<sub>C</sub>), 7.00-6.96 (m, 2H, 1<sub>B</sub>/5<sub>B</sub>), 6.87 (dd, J = 8.5, 1.1 Hz, 1H, 2<sub>B</sub>), 6.83 (td, J = 7.7, 1.2 Hz, 1H, 6<sub>B</sub>), 6.39 (d, J = 16.0 Hz, 1H, 8), 5.72 (dd, J = 7.0, 3.7

Hz, 1H,  $\beta$ ), 4.84 (dd,  $J = 11.9, 3.7$  Hz, 1H,  $\gamma$ ), 4.60 (dd,  $J = 11.9, 7.0$  Hz, 1H,  $\gamma$ ), 3.89 (s, 3H, OMe<sub>A</sub>), 3.86 (s, 3H, OMe<sub>C</sub>), 3.75 (s, 3H, OMe<sub>B</sub>), 2.33 (s, 3H, OAc<sub>A</sub>), 2.32 (s, 3H, OAc<sub>C</sub>); <sup>13</sup>C NMR (CDCl<sub>3</sub>)  $\delta$  194.7 ( $\alpha$ ), 169.0 (OAc<sub>A/C</sub>), 168.5 (OAc<sub>A/C</sub>), 166.7 (9), 151.6 (3<sub>A</sub>), 151.5 (3<sub>C</sub>), 150.6 (3<sub>B</sub>), 146.8 (4<sub>B</sub>), 145.1 (7), 144.5 (4<sub>A</sub>), 141.7 (4<sub>C</sub>), 133.7 (1<sub>A</sub>), 133.2 (1<sub>C</sub>), 123.9 (1<sub>B</sub>), 123.4 (5<sub>C</sub>), 123.2 (5<sub>A</sub>), 122.5 (6<sub>A</sub>), 121.6 (6<sub>C</sub>), 121.1 (6<sub>B</sub>), 118.9 (5<sub>B</sub>), 117.6 (8), 112.7 (2<sub>A</sub>), 112.6 (2<sub>B</sub>), 111.3 (2<sub>C</sub>), 80.7 ( $\beta$ ), 64.7 ( $\gamma$ ), 56.2 (OMe<sub>A</sub>), 56.1 (OMe<sub>C</sub>), 55.8 (OMe<sub>B</sub>), 20.8 (OAc<sub>A/C</sub>); HRMS (ESI)  $m/z$  calcd for  $[M+NH_4]^+$  = 596.2127, meas 596.2107.

**5<sub>GG-SA</sub>** (598 mg, 70%), white foam: <sup>1</sup>H NMR (CDCl<sub>3</sub>)  $\delta$  7.84 (dd,  $J = 8.2, 1.9$  Hz, 1H, 6<sub>A</sub>), 7.82 (d,  $J = 1.9$  Hz, 1H, 2<sub>A</sub>), 7.57 (d,  $J = 16.0$  Hz, 1H, 7), 7.15 (d,  $J = 8.2$  Hz, 1H, 5<sub>A</sub>), 7.02-6.97 (m, 2H, 1<sub>B</sub>/5<sub>B</sub>), 6.88 (d,  $J = 8.5, 1.3$  Hz, 1H, 2<sub>B</sub>), 6.84 (td,  $J = 7.7, 1.5$  Hz, 1H, 6<sub>B</sub>), 6.74 (s, 2H, 2<sub>C</sub>/6<sub>C</sub>), 6.39 (d,  $J = 16.0$  Hz, 1H, 8), 5.72 (dd,  $J = 6.9, 3.7$  Hz, 1H,  $\beta$ ), 4.84 (dd,  $J = 11.9, 3.7$  Hz, 1H,  $\gamma$ ), 4.61 (dd,  $J = 11.9, 6.9$  Hz, 1H,  $\gamma$ ), 3.89 (s, 3H, OMe<sub>A</sub>), 3.85 (s, 6H, OMe<sub>C</sub>), 3.75 (s, 3H, OMe<sub>B</sub>), 2.35 (s, 3H, OAc<sub>C</sub>), 2.33 (s, 3H, OAc<sub>A</sub>); <sup>13</sup>C NMR (CDCl<sub>3</sub>)  $\delta$  194.7 ( $\alpha$ ), 168.7 (OAc<sub>C</sub>), 168.5 (OAc<sub>A</sub>), 166.7 (9), 152.5 (3<sub>C</sub>/5<sub>C</sub>), 151.6 (3<sub>A</sub>), 150.6 (3<sub>B</sub>), 146.8 (4<sub>B</sub>), 145.5 (7), 144.5 (4<sub>A</sub>), 133.7 (1<sub>A</sub>), 132.6 (1<sub>C</sub>), 130.6 (4<sub>C</sub>), 123.9 (1<sub>B</sub>), 123.2 (5<sub>A</sub>), 122.5 (6<sub>A</sub>), 121.1 (6<sub>B</sub>), 118.9 (5<sub>B</sub>), 117.7 (8), 112.8 (2<sub>A</sub>), 112.6 (2<sub>B</sub>), 104.8 (2<sub>C</sub>/6<sub>C</sub>), 80.7 ( $\beta$ ), 64.7 ( $\gamma$ ), 56.3 (OMe<sub>C</sub>), 56.2 (OMe<sub>A</sub>), 55.8 (OMe<sub>B</sub>), 20.8 (OAc<sub>A</sub>), 20.6 (OAc<sub>C</sub>); HRMS(ESI)  $m/z$  calcd for  $[M+NH_4]^+$  = 626.2233, meas 626.2227.

**5<sub>GS-pBA</sub>** (387 mg, 54%), white foam: <sup>1</sup>H NMR (CDCl<sub>3</sub>)  $\delta$  7.91-7.87 (m, 3H, 6<sub>A</sub>/2<sub>C</sub>/6<sub>C</sub>), 7.86 (d,  $J = 1.8$  Hz, 1H, 2<sub>A</sub>), 7.12 (d,  $J = 8.3$  Hz, 1H, 5<sub>A</sub>), 7.11 (d,  $J = 8.8$  Hz, 2H, 3<sub>C</sub>/5<sub>C</sub>), 6.97 (t,  $J = 8.4$  Hz, 1H, 1<sub>B</sub>), 6.51 (d,  $J = 8.4$  Hz, 2H, 2<sub>B</sub>/6<sub>B</sub>), 5.55 (dd,  $J = 6.5, 4.1$  Hz, 1H,  $\beta$ ), 4.82 (dd,  $J = 11.9, 4.1$  Hz, 1H,  $\gamma$ ), 4.76 (dd,  $J = 11.8, 6.5$  Hz, 1H,  $\gamma$ ), 3.87 (s, 3H, OMe<sub>A</sub>), 3.63 (s, 6H, OMe<sub>B</sub>), 2.34 (s, 3H, OAc<sub>A</sub>), 2.31 (s, 3H, OAc<sub>C</sub>); <sup>13</sup>C NMR (CDCl<sub>3</sub>)  $\delta$  195.1 ( $\alpha$ ), 169.0 (OAc<sub>C</sub>), 168.6 (OAc<sub>A</sub>), 165.5 (9), 154.5 (4<sub>C</sub>), 153.0 (3<sub>B</sub>/5<sub>B</sub>), 151.4 (3<sub>A</sub>), 144.1 (4<sub>A</sub>), 135.9 (4<sub>B</sub>), 134.4 (1<sub>A</sub>), 131.4 (2<sub>C</sub>/6<sub>C</sub>), 127.4 (1<sub>C</sub>), 124.4 (1<sub>B</sub>), 123.0 (6<sub>A</sub>), 122.9 (5<sub>A</sub>), 121.7 (3<sub>C</sub>/5<sub>C</sub>), 113.1 (2<sub>A</sub>), 105.1 (2<sub>B</sub>/6<sub>B</sub>), 82.5 ( $\beta$ ), 65.2 ( $\gamma$ ), 56.2 (OMe<sub>A</sub>), 55.9 (OMe<sub>B</sub>), 21.3 (OAc<sub>C</sub>), 20.8 (OAc<sub>A</sub>); HRMS(ESI)  $m/z$  calcd for  $[M+NH_4]^+$  = 570.1970, meas 570.1982.

**5<sub>GS-pCA</sub>** (473 mg, 63%), white foam: <sup>1</sup>H NMR (CDCl<sub>3</sub>)  $\delta$  7.87 (dd,  $J = 8.2, 1.8$  Hz, 1H, 6<sub>A</sub>), 7.86 (d,  $J = 1.7$  Hz, 1H, 2<sub>A</sub>), 7.51 (d,  $J = 16.0$  Hz, 1H, 7), 7.48 (d,  $J = 8.6$  Hz, 2H, 2<sub>C</sub>/6<sub>C</sub>), 7.12 (d,  $J = 8.3$  Hz, 1H, 5<sub>A</sub>), 7.11 (d,  $J = 8.6$  Hz, 2H, 3<sub>C</sub>/5<sub>C</sub>), 6.99 (t,  $J = 8.4$  Hz, 1H, 1<sub>B</sub>), 6.53 (d,  $J = 8.4$  Hz, 2H, 2<sub>B</sub>/6<sub>B</sub>), 6.30 (d,  $J = 16.0$  Hz, 1H, 8), 5.50 (dd,  $J = 6.2, 4.3$  Hz, 1H,  $\beta$ ), 4.73 (dd,  $J = 11.8, 4.3$  Hz, 1H,  $\gamma$ ), 4.66 (dd,  $J = 11.8, 6.3$  Hz, 1H,  $\gamma$ ), 3.88 (s, 3H, OMe<sub>A</sub>), 3.71 (s, 6H, OMe<sub>B</sub>), 2.34 (s, 3H, OAc<sub>A</sub>), 2.32 (s, 3H, OAc<sub>C</sub>); <sup>13</sup>C NMR (CDCl<sub>3</sub>)  $\delta$  195.2 ( $\alpha$ ), 169.3 (OAc<sub>C</sub>), 168.6 (OAc<sub>A</sub>), 166.5 (9), 153.1 (3<sub>B</sub>/5<sub>B</sub>), 152.3 (4<sub>C</sub>), 151.3 (3<sub>A</sub>), 144.2 (7), 144.1 (4<sub>A</sub>), 135.9 (4<sub>B</sub>), 134.5 (1<sub>A</sub>), 132.1 (1<sub>C</sub>), 129.4 (2<sub>C</sub>/6<sub>C</sub>), 124.4 (1<sub>B</sub>), 123.0 (6<sub>A</sub>),

122.8 (5<sub>A</sub>), 122.3 (3<sub>C</sub>/5<sub>C</sub>), 117.8 (8), 113.1 (2<sub>A</sub>), 105.2 (2<sub>B</sub>/6<sub>B</sub>), 82.3 (β), 64.7 (γ), 56.2 (OMe<sub>A</sub>), 56.0 (OMe<sub>B</sub>), 21.3 (OAc<sub>C</sub>), 20.8 (OAc<sub>A</sub>); HRMS (ESI) *m/z* calcd for [M+NH<sub>4</sub>]<sup>+</sup> = 596.2127, meas 596.2112.

**5<sub>GS-FA</sub>** (365 mg, 46%), white foam: <sup>1</sup>H NMR (CDCl<sub>3</sub>) δ 7.88-7.84 (m, 2H, 2<sub>A</sub>/6<sub>A</sub>), 7.49 (d, J = 16.0 Hz, 1H, 7), 7.12 (d, J = 8.5 Hz, 1H, 5<sub>A</sub>), 7.06-7.03 (m, 3H, 2<sub>C</sub>/5<sub>C</sub>/6<sub>C</sub>), 6.99 (t, J = 8.4 Hz, 1H, 1<sub>B</sub>), 6.54 (d, J = 8.4 Hz, 2H, 2<sub>B</sub>/6<sub>B</sub>), 6.31 (d, J = 16.0 Hz, 1H, 8), 5.50 (dd, J = 6.1, 4.4 Hz, 1H, β), 4.73 (dd, J = 11.8, 4.3 Hz, 1H, γ), 4.67 (dd, J = 11.8, 6.1 Hz, 1H, γ), 3.88 (s, 3H, OMe<sub>A</sub>), 3.86 (s, 3H, OMe<sub>B</sub>), 3.71 (s, 6H, OMe<sub>B</sub>), 2.33 (s, 3H, OAc<sub>A</sub>), 2.32 (s, 3H, OAc<sub>C</sub>); <sup>13</sup>C NMR (CDCl<sub>3</sub>) δ 195.2 (α), 169.0 (OAc<sub>C</sub>), 168.6 (OAc<sub>A</sub>), 166.5 (9), 153.1 (3<sub>B</sub>/5<sub>B</sub>), 151.5 (3<sub>C</sub>), 151.3 (3<sub>A</sub>), 144.6 (7), 144.1 (4<sub>A</sub>), 141.6 (4<sub>C</sub>), 135.9 (4<sub>B</sub>), 134.5 (1<sub>A</sub>), 133.3 (1<sub>C</sub>), 124.4 (1<sub>B</sub>), 123.4 (5<sub>C</sub>), 123.0 (6<sub>A</sub>), 122.8 (5<sub>A</sub>), 121.5 (6<sub>C</sub>), 117.9 (8), 113.1 (2<sub>A</sub>), 111.2 (2<sub>C</sub>), 105.1 (2<sub>B</sub>/6<sub>B</sub>), 82.2 (β), 64.6 (γ), 56.2 (OMe<sub>A</sub>), 56.0 (OMe<sub>C</sub>), 56.0 (OMe<sub>B</sub>), 20.8 (OAc<sub>A/C</sub>); HRMS(ESI) *m/z* calcd for [M+NH<sub>4</sub>]<sup>+</sup> = 626.2233, meas 626.2252.

**5<sub>GS-SA</sub>** (466 mg, 49%), white foam: <sup>1</sup>H NMR (CDCl<sub>3</sub>) δ 7.88-7.85 (m, 2H, 2<sub>A</sub>/6<sub>A</sub>), 7.47 (d, J = 16.0 Hz, 1H, 7), 7.12 (d, J = 8.9 Hz, 1H, 5<sub>A</sub>), 6.99 (t, J = 8.4 Hz, 1H, 1<sub>B</sub>), 6.70 (s, 2H, 2<sub>C</sub>/6<sub>C</sub>), 6.54 (d, J = 8.4 Hz, 2H, 2<sub>B</sub>/6<sub>B</sub>), 6.32 (d, J = 16.0 Hz, 1H, 8), 5.50 (dd, J = 5.8, 4.5 Hz, 1H, β), 4.73 (dd, J = 11.8, 4.4 Hz, 1H, γ), 4.67 (dd, J = 11.8, 5.9 Hz, 1H, γ), 3.88 (s, 3H, OMe<sub>A</sub>), 3.84 (s, 6H, OMe<sub>C</sub>), 3.71 (s, 6H, OMe<sub>B</sub>), 2.35 (s, 3H, OAc<sub>C</sub>), 2.33 (s, 3H, OAc<sub>A</sub>); <sup>13</sup>C NMR (CDCl<sub>3</sub>) δ 195.1 (α), 168.7 (OAc<sub>C</sub>), 168.6 (OAc<sub>A</sub>), 166.4 (9), 153.1 (3<sub>B</sub>/5<sub>B</sub>), 152.5 (3<sub>C</sub>/5<sub>C</sub>), 151.3 (3<sub>A</sub>), 145.0 (7), 144.1 (4<sub>A</sub>), 135.8 (4<sub>B</sub>), 134.5 (1<sub>A</sub>), 132.7 (1<sub>C</sub>), 130.5 (4<sub>C</sub>), 124.4 (1<sub>B</sub>), 123.0 (6<sub>A</sub>), 122.8 (5<sub>A</sub>), 118.0 (8), 113.2 (2<sub>A</sub>), 105.2 (2<sub>B</sub>/6<sub>B</sub>), 104.7 (2<sub>C</sub>/6<sub>C</sub>), 82.2 (β), 64.5 (γ), 56.3 (OMe<sub>C</sub>), 56.2 (OMe<sub>A</sub>), 56.0 (OMe<sub>B</sub>), 20.8 (OAc<sub>A</sub>), 20.6 (OAc<sub>C</sub>); HRMS(ESI) *m/z* calcd for [M+NH<sub>4</sub>]<sup>+</sup> = 656.2338, meas 656.2358.

**5<sub>SG-pBA</sub>** (547 mg, 76%), white foam: <sup>1</sup>H NMR (CDCl<sub>3</sub>) δ 8.00 (d, J = 8.8 Hz, 2H, 2<sub>C</sub>/6<sub>C</sub>), 7.56 (s, 2H, 2<sub>A</sub>/6<sub>A</sub>), 7.15 (d, J = 8.8 Hz, 2H, 3<sub>C</sub>/5<sub>C</sub>), 7.00-6.95 (m, 2H, 1<sub>B</sub>/5<sub>B</sub>), 6.87-6.80 (m, 2H, 2<sub>B</sub>/6<sub>B</sub>), 5.74 (dd, J = 7.3, 3.6 Hz, 1H, β), 4.99 (dd, J = 12.1, 3.7 Hz, 1H, γ), 4.68 (dd, J = 11.9, 7.3 Hz, γ), 3.86 (OMe<sub>A</sub>), 3.67 (OMe<sub>B</sub>), 2.36 (OAc<sub>A</sub>), 2.32 (OAc<sub>C</sub>); <sup>13</sup>C NMR (CDCl<sub>3</sub>) δ 194.6 (α), 169.0 (OAc<sub>C</sub>), 168.3 (OAc<sub>A</sub>), 165.8 (9), 154.7 (4<sub>C</sub>), 152.5 (3<sub>A</sub>/5<sub>A</sub>), 150.5 (3<sub>B</sub>), 146.8 (4<sub>B</sub>), 133.5 (4<sub>A</sub>), 132.8 (1<sub>A</sub>), 131.5 (2<sub>C</sub>/6<sub>C</sub>), 127.2 (1<sub>C</sub>), 123.8 (1<sub>B</sub>), 121.8 (3<sub>C</sub>/5<sub>C</sub>), 121.2 (6<sub>B</sub>), 118.6 (5<sub>B</sub>), 112.7 (2<sub>B</sub>), 106.1 (2<sub>A</sub>/6<sub>A</sub>), 81.0 (β), 65.3 (γ), 56.5 (OMe<sub>A</sub>), 55.7 (OMe<sub>B</sub>), 21.3 (OAc<sub>C</sub>), 20.6 (OAc<sub>A</sub>); HRMS(ESI) *m/z* calcd for [M+NH<sub>4</sub>]<sup>+</sup> = 570.1970, meas 570.1949.

**5<sub>SG-pCA</sub>** (449 mg, 78%), white foam: <sup>1</sup>H NMR (CDCl<sub>3</sub>) δ 7.64 (d, J = 16.0 Hz, 1H, 7), 7.55 (s, 2H, 2<sub>A</sub>/6<sub>A</sub>), 7.52 (d, J = 8.6 Hz, 2H, 2<sub>C</sub>/6<sub>C</sub>), 7.13 (d, J = 8.6 Hz, 2H, 3<sub>C</sub>/5<sub>C</sub>), 7.01-6.94 (m, 2H, 1<sub>B</sub>/5<sub>B</sub>), 6.90-6.80 (m, 2H, 2<sub>B</sub>/6<sub>B</sub>), 6.40 (d, J = 16.0 Hz, 1H, 8), 5.72 (dd, J = 7.4, 3.5 Hz, 1H, β), 4.91 (dd, J = 12.0, 3.4 Hz, 1H, γ), 4.56 (dd, J = 12.0, 7.4 Hz, 1H, γ), 3.88 (s, 6H, OMe<sub>A</sub>), 3.75 (s, 3H, OMe<sub>B</sub>), 2.36 (s, 3H,



OAc<sub>A</sub>), 2.32 (s, 3H, OAc<sub>C</sub>); <sup>13</sup>C NMR (CDCl<sub>3</sub>) δ 194.6 (α), 169.3 (OAc<sub>C</sub>), 168.3 (OAc<sub>A</sub>), 166.8 (9), 152.5 (3<sub>A</sub>/5<sub>A</sub>), 152.4 (4<sub>C</sub>), 150.5 (3<sub>B</sub>), 146.8 (4<sub>B</sub>), 144.8 (7), 133.5 (4<sub>A</sub>), 132.7 (1<sub>A</sub>), 132.0 (1<sub>C</sub>), 129.5 (2<sub>C</sub>/6<sub>C</sub>), 123.8 (1<sub>B</sub>), 122.4 (3<sub>C</sub>/5<sub>C</sub>), 121.2 (6<sub>B</sub>), 118.4 (5<sub>B</sub>), 117.5 (8), 112.6 (2<sub>B</sub>), 106.0 (2<sub>A</sub>/6<sub>A</sub>), 80.9 (β), 64.9 (γ), 56.5 (OMe<sub>A</sub>), 55.8 (OMe<sub>B</sub>), 21.3 (OAc<sub>C</sub>), 20.6 (OAc<sub>A</sub>); HRMS(ESI) *m/z* calcd for [M+NH<sub>4</sub>]<sup>+</sup> = 596.2127, meas 596.2108.

**5<sub>SG-FA</sub>** (277 mg, 45%), white foam: <sup>1</sup>H NMR (CDCl<sub>3</sub>) δ 7.62 (d, J = 16.0 Hz, 1H, 7), 7.55 (s, 2H, 2<sub>A</sub>/6<sub>A</sub>), 7.10 (dd, J = 8.1, 1.8 Hz, 1H, 6<sub>C</sub>), 7.08 (d, J = 1.6 Hz, 1H, 2<sub>C</sub>), 7.05 (d, J = 8.1 Hz, 1H, 5<sub>C</sub>), 7.01-6.96 (m, 2H, 1<sub>B</sub>/5<sub>B</sub>), 6.89-6.83 (m, 2H, 2<sub>B</sub>/6<sub>B</sub>), 6.40 (d, J = 16.0 Hz, 1H, 8), 5.72 (dd, J = 7.3, 3.5 Hz, 1H, β), 4.91 (dd, J = 12.0, 3.5 Hz, 1H, γ), 4.57 (dd, J = 12.0, 7.3 Hz, 1H, γ), 3.88 (OMe<sub>A</sub>), 3.86 (OMe<sub>C</sub>), 3.75 (OMe<sub>B</sub>), 2.35 (OAc<sub>A</sub>), 2.33 (OAc<sub>C</sub>); <sup>13</sup>C NMR (CDCl<sub>3</sub>) δ 194.6 (α), 169.0 (OAc<sub>C</sub>), 168.3 (OAc<sub>A</sub>), 166.8 (9), 152.5 (3<sub>A</sub>/5<sub>A</sub>), 151.5 (3<sub>C</sub>), 150.5 (3<sub>B</sub>), 146.8 (4<sub>B</sub>), 145.2 (7), 141.7 (4<sub>C</sub>), 133.5 (4<sub>A</sub>), 133.2 (1<sub>C</sub>), 132.7 (1<sub>A</sub>), 123.8 (1<sub>B</sub>), 123.5 (5<sub>C</sub>), 121.6 (6<sub>C</sub>), 121.2 (6<sub>B</sub>), 118.5 (5<sub>B</sub>), 117.6 (8), 112.6 (2<sub>B</sub>), 111.3 (2<sub>C</sub>), 106.0 (2<sub>A</sub>/6<sub>A</sub>), 80.8 (β), 64.9 (γ), 56.5 (OMe<sub>A</sub>), 56.1 (OMe<sub>C</sub>), 55.9 (OMe<sub>B</sub>), 20.8 (OAc<sub>C</sub>), 20.6 (OAc<sub>A</sub>); HRMS(ESI) *m/z* calcd for [M+NH<sub>4</sub>]<sup>+</sup> = 626.2233, meas 626.2216.

**5<sub>SG-SA</sub>** (363 mg, 57%), white foam: <sup>1</sup>H NMR (CDCl<sub>3</sub>) δ 7.58 (d, J = 16.0 Hz, 1H, 7), 7.56 (s, 2H, 2<sub>A</sub>/6<sub>A</sub>), 7.01-6.96 (m, 2H, 1<sub>B</sub>/5<sub>B</sub>), 6.88 (dd, J = 8.3, 1.1 Hz, 1H, 2<sub>B</sub>), 6.84 (td, J = 7.7, 1.5 Hz, 1H, 6<sub>B</sub>), 6.74 (s, 2H, 2<sub>C</sub>/6<sub>C</sub>), 6.40 (d, J = 16.0 Hz, 1H, 8), 5.72 (dd, J = 7.2, 3.5 Hz, 1H, β), 4.91 (dd, J = 12.0, 3.5 Hz, 1H, γ), 4.57 (dd, J = 12.0, 7.3 Hz, 1H, γ), 3.88 (s, 6H, OMe<sub>A</sub>), 3.85 (s, 6H, OMe<sub>C</sub>), 3.75 (s, 3H, OMe<sub>B</sub>), 2.35 (s, 6H, OAc<sub>A/C</sub>); <sup>13</sup>C NMR (CDCl<sub>3</sub>) δ 194.6 (α), 168.7 (OAc<sub>A/C</sub>), 168.3 (OAc<sub>A/C</sub>), 166.7 (9), 152.6 (3<sub>C</sub>/5<sub>C</sub>), 152.5 (3<sub>A</sub>/5<sub>A</sub>), 150.5 (3<sub>B</sub>), 146.7 (4<sub>B</sub>), 145.6 (7), 133.5 (4<sub>A</sub>), 132.7 (1<sub>A</sub>), 132.5 (1<sub>C</sub>), 130.7 (4<sub>C</sub>), 123.8 (1<sub>B</sub>), 121.2 (6<sub>B</sub>), 118.5 (5<sub>B</sub>), 117.7 (8), 112.6 (2<sub>B</sub>), 106.0 (2<sub>A</sub>/6<sub>A</sub>), 104.8 (2<sub>C</sub>/6<sub>C</sub>), 80.8 (β), 64.9 (γ), 56.5 (OMe<sub>A</sub>), 56.3 (OMe<sub>C</sub>), 55.9 (OMe<sub>B</sub>), 20.6 (OAc<sub>A/C</sub>), 20.6 (OAc<sub>A/C</sub>); HRMS(ESI) *m/z* calcd for [M+NH<sub>4</sub>]<sup>+</sup> = 656.2338, meas 656.2332.

**5<sub>SS-pBA</sub>** (381 mg, 69%), white foam: <sup>1</sup>H NMR (CDCl<sub>3</sub>) δ 7.90 (d, J = 8.8 Hz, 2H, 2<sub>C</sub>/6<sub>C</sub>), 7.57 (s, 2H, 2<sub>A</sub>/6<sub>A</sub>), 7.12 (d, J = 8.8 Hz, 2H, 3<sub>C</sub>/5<sub>C</sub>), 6.97 (t, J = 8.4 Hz, 1H, 1<sub>B</sub>), 6.51 (d, J = 8.4 Hz, 2H, 2<sub>B</sub>/6<sub>B</sub>), 5.58 (dd, J = 6.6, 4.1 Hz, 1H, β), 4.87 (dd, J = 11.9, 4.0 Hz, 1H, γ), 4.72 (dd, J = 11.9, 6.5 Hz, 1H, γ), 3.84 (s, 6H, OMe<sub>A</sub>), 3.64 (s, 6H, OMe<sub>B</sub>), 2.36 (s, 3H, OAc<sub>A</sub>), 2.31 (s, 3H, OAc<sub>C</sub>); <sup>13</sup>C NMR (CDCl<sub>3</sub>) δ 195.0 (α), 169.0 (OAc<sub>C</sub>), 168.3 (OAc<sub>A</sub>), 165.6 (9), 154.5 (4<sub>C</sub>), 153.1 (3<sub>B</sub>/5<sub>B</sub>), 152.2 (3<sub>A</sub>/5<sub>A</sub>), 135.7 (4<sub>B</sub>), 133.6 (1<sub>A</sub>), 133.2 (4<sub>A</sub>), 131.4 (2<sub>C</sub>/6<sub>C</sub>), 127.4 (1<sub>C</sub>), 124.4 (1<sub>B</sub>), 121.7 (3<sub>C</sub>/5<sub>C</sub>), 106.5 (2<sub>A</sub>/6<sub>A</sub>), 105.1 (2<sub>B</sub>/6<sub>B</sub>), 82.2 (β), 65.1 (γ), 56.5 (OMe<sub>A</sub>), 55.9 (OMe<sub>B</sub>), 21.3 (OAc<sub>C</sub>), 20.6 (OAc<sub>A</sub>); HRMS(ESI) *m/z* calcd for [M+NH<sub>4</sub>]<sup>+</sup> = 600.2076, meas 600.2092.

**5<sub>SS-pCA</sub>** (405 mg, 70%), white foam: <sup>1</sup>H NMR (CDCl<sub>3</sub>) δ 7.56 (s, 2H, 2<sub>A</sub>/6<sub>A</sub>), 7.52 (d, J = 16.1 Hz, 1H, 7), 7.48 (d, J = 8.6 Hz, 2H, 2<sub>C</sub>/6<sub>C</sub>), 7.11 (d, J = 8.6 Hz, 2H, 3<sub>C</sub>/5<sub>C</sub>), 6.99 (t, J = 8.4 Hz, 1H, 1<sub>B</sub>), 6.54 (d, J = 8.4 Hz, 2H, 2<sub>B</sub>/6<sub>B</sub>), 6.31 (d, J = 16.1 Hz, 1H, 8), 5.54 (dd, J = 6.4, 4.1 Hz, 1H, β), 4.77 (dd, J = 11.9, 4.1 Hz, 1H, γ), 4.63 (dd, J = 11.9, 6.4 Hz, 1H, γ), 3.85 (s, 6H, OMe<sub>A</sub>), 3.71 (s, 6H, OMe<sub>B</sub>), 2.36 (s, 3H, OAc<sub>A</sub>), 2.31 (s, 3H, OAc<sub>C</sub>); <sup>13</sup>C NMR (CDCl<sub>3</sub>) δ 195.0 (α), 169.3 (OAc<sub>C</sub>), 168.3 (OAc<sub>A</sub>), 166.6 (9), 153.2 (3<sub>B</sub>/5<sub>B</sub>), 152.3 (4<sub>C</sub>), 152.2 (3<sub>A</sub>/5<sub>A</sub>), 144.2 (7), 135.7 (4<sub>B</sub>), 133.6 (1<sub>A</sub>), 133.1 (4<sub>A</sub>), 132.1 (1<sub>C</sub>), 129.4 (2<sub>C</sub>/6<sub>C</sub>), 124.4 (1<sub>B</sub>), 122.3 (3<sub>C</sub>/5<sub>C</sub>), 117.8 (8), 106.5 (2<sub>A</sub>/6<sub>A</sub>), 105.2 (2<sub>B</sub>/6<sub>B</sub>), 82.0 (β), 64.6 (γ), 56.4 (OMe<sub>A</sub>), 56.0 (OMe<sub>B</sub>), 21.3 (OAc<sub>C</sub>), 20.6 (OAc<sub>A</sub>); HRMS(ESI) *m/z* calcd for [M+NH<sub>4</sub>]<sup>+</sup> = 626.2233, meas 626.2256.

**5<sub>SS-FA</sub>** (197 mg, 51%), white foam: <sup>1</sup>H NMR (CDCl<sub>3</sub>) δ 7.56 (s, 2H, 2<sub>A</sub>/6<sub>A</sub>), 7.51 (d, 16.0 Hz, 1H, 7), 7.08-7.03 (m, 3H, 2<sub>C</sub>/5<sub>C</sub>/6<sub>C</sub>), 6.99 (t, 8.4 Hz, 1H, 1<sub>B</sub>), 6.54 (d, J = 8.5 Hz, 2H, 2<sub>B</sub>/6<sub>B</sub>), 6.32 (d, J = 16.0 Hz, 1H, 8), 5.54 (dd, J = 6.1, 4.2 Hz, 1H, β), 4.78 (dd, J = 11.9, 4.2 Hz, 1H, γ), 4.63 (dd, J = 11.8, 6.2 Hz, 1H, γ), 3.86 (s, 3H, OMe<sub>C</sub>), 3.85 (s, 6H, OMe<sub>A</sub>), 3.71 (s, 6H, OMe<sub>B</sub>), 2.35 (OAc<sub>A</sub>), 2.33 (OAc<sub>C</sub>); <sup>13</sup>C NMR (CDCl<sub>3</sub>) δ 195.0 (α), 169.0 (OAc<sub>C</sub>), 168.3 (OAc<sub>A</sub>), 166.5 (9), 153.2 (3<sub>B</sub>/5<sub>B</sub>), 152.2 (3<sub>A</sub>/5<sub>A</sub>), 151.5 (3<sub>C</sub>), 144.6 (7), 141.6 (4<sub>C</sub>), 135.6 (4<sub>B</sub>), 133.6 (1<sub>A</sub>), 133.3 (1<sub>C</sub>), 133.1 (4<sub>A</sub>), 124.5 (1<sub>B</sub>), 123.4 (5<sub>C</sub>), 121.5 (6<sub>C</sub>), 117.9 (8), 111.2 (2<sub>C</sub>), 106.5 (2<sub>A</sub>/6<sub>A</sub>), 105.2 (2<sub>B</sub>/6<sub>B</sub>), 82.0 (β), 64.6 (γ), 56.5 (OMe<sub>C</sub>), 56.1 (OMe<sub>A</sub>), 56.0 (OMe<sub>B</sub>), 20.8 (OAc<sub>C</sub>), 20.6 (OAc<sub>A</sub>); HRMS(ESI) *m/z* calcd for [M+NH<sub>4</sub>]<sup>+</sup> = 656.2338, meas 656.2312.

**5<sub>SS-SA</sub>** (276 mg, 69%), white foam: <sup>1</sup>H NMR (CDCl<sub>3</sub>) δ 7.57 (s, 2H, 2<sub>A</sub>/6<sub>A</sub>), 7.48 (d, J = 16.0 Hz, 1H, 7), 7.00 (t, J = 8.4 Hz, 1H, 1<sub>B</sub>), 6.71 (s, 2H, 2<sub>C</sub>/6<sub>C</sub>), 6.55 (d, J = 8.5 Hz, 2H, 2<sub>B</sub>/6<sub>B</sub>), 6.33 (d, J = 16.0 Hz, 1H, 8), 5.53 (dd, J = 5.9, 4.3 Hz, 1H, β), 4.77 (dd, J = 11.8, 4.2 Hz, 1H, γ), 4.63 (dd, J = 11.8, 6.0 Hz, 1H, γ), 3.85 (s, 6H, OMe<sub>A</sub>), 3.84 (s, 6H, OMe<sub>C</sub>), 3.72 (s, 6H, OMe<sub>B</sub>), 2.35 (s, 3H, OAc), 2.34 (s, 3H, OAc); <sup>13</sup>C NMR (CDCl<sub>3</sub>) δ 195.1 (α), 168.7 (OAc<sub>A/C</sub>), 168.3 (OAc<sub>A/C</sub>), 166.5 (9), 153.2 (3<sub>B</sub>/5<sub>B</sub>), 152.5 (3<sub>C</sub>/5<sub>C</sub>), 152.2 (3<sub>A</sub>/5<sub>A</sub>), 145.0 (7), 135.6 (4<sub>B</sub>), 133.7 (1<sub>A</sub>), 133.1 (4<sub>A</sub>), 132.6 (1<sub>C</sub>), 130.5 (4<sub>C</sub>), 124.5 (1<sub>B</sub>), 118.0 (8), 106.6 (2<sub>A</sub>/6<sub>A</sub>), 105.2 (2<sub>B</sub>/6<sub>B</sub>), 104.7 (2<sub>C</sub>/6<sub>C</sub>), 82.0 (β), 64.5 (γ), 56.5 (OMe<sub>A/C</sub>), 56.3 (OMe<sub>A/C</sub>), 56.1 (OMe<sub>B</sub>), 20.6 (OAc<sub>A/C</sub>); HRMS(ESI) *m/z* calcd for [M+NH<sub>4</sub>]<sup>+</sup> = 686.2444, meas 686.2451.

**Synthesis of γ-acetylated β-O-4 dimers:** Acetylated dimers **5<sub>GG-Ac</sub>-5<sub>SS-Ac</sub>** were synthesized from the corresponding β-ether dimer intermediates **4<sub>GG</sub>-4<sub>SS</sub>** using acetic anhydride and pyridine as previously reported.<sup>2,4</sup>

**5<sub>GG-Ac</sub>** (400 mg, 99%), white solid: <sup>1</sup>H NMR (CDCl<sub>3</sub>) δ 7.79 (dd, J = 8.3, 1.9 Hz, 1H, 6<sub>A</sub>), 7.77 (dd, J = 1.8 Hz, 1H, 2<sub>A</sub>), 7.13 (d, J = 8.3 Hz, 1H, 5<sub>A</sub>), 6.98 (td, J = 7.8, 1.4 Hz, 1H, 1<sub>B</sub>), 6.93 (dd, J = 8.0, 1.3 Hz, 1H, 5<sub>B</sub>), 6.88 (dd, J = 8.1, 1.1 Hz, 1H, 2<sub>B</sub>), 6.83 (td, J = 7.7, 1.2 Hz, 1H, 6<sub>B</sub>), 5.62 (dd, J = 7.0, 3.8 Hz,

1H,  $\beta$ ), 4.67 (dd,  $J = 11.9, 3.8$  Hz, 1H,  $\gamma$ ), 4.50 (dd,  $J = 11.9, 7.0$  Hz, 1H,  $\gamma$ ), 3.88 (s, 3H, OMe<sub>A</sub>), 3.75 (s, 3H, OMe<sub>B</sub>), 2.33 (s, 3H, OAc<sub>A</sub>), 2.05 (s, 3H, OAc <sub>$\gamma$</sub> ); <sup>13</sup>C NMR (CDCl<sub>3</sub>)  $\delta$  194.7 ( $\alpha$ ), 171.1 (OAc <sub>$\gamma$</sub> ), 168.5 (OAc<sub>A</sub>), 151.6 (3<sub>A</sub>), 150.4 (3<sub>B</sub>), 146.8 (4<sub>B</sub>), 144.4 (4<sub>A</sub>), 133.7 (1<sub>A</sub>), 123.8 (1<sub>B</sub>), 123.1 (5<sub>A</sub>), 122.4 (6<sub>A</sub>), 121.1 (6<sub>B</sub>), 118.5 (5<sub>B</sub>), 112.7 (2<sub>B</sub>), 112.6 (2<sub>A</sub>), 80.5 ( $\beta$ ), 64.5 ( $\gamma$ ), 56.2 (OMe<sub>A</sub>), 55.8 (OMe<sub>B</sub>), 20.9 (OAc <sub>$\gamma$</sub> ), 20.8 (OAc<sub>A</sub>); HRMS (ESI)  $m/z$  calcd for [M+NH<sub>4</sub>]<sup>+</sup> = 420.1732, meas 420.1720.

**5<sub>GS-Ac</sub>** (434 mg, 77%), white solid: <sup>1</sup>H NMR (CDCl<sub>3</sub>)  $\delta$  7.81 (dd,  $J = 8.2, 1.9$  Hz, 1H, 6<sub>A</sub>), 7.80 (d,  $J = 1.8$  Hz, 1H, 2<sub>A</sub>), 7.11 (d,  $J = 8.2$  Hz, 1H, 5<sub>A</sub>), 6.99 (t,  $J = 8.37$  Hz, 1H, 1<sub>B</sub>), 6.54 (d,  $J = 8.4$  Hz, 2H, 2<sub>B</sub>/6<sub>B</sub>), 5.40 (dd,  $J = 5.9, 5.0$  Hz, 1H,  $\beta$ ), 4.59-4.54 (m, 2H,  $\gamma$ ), 3.88 (s, 3H, OMe<sub>A</sub>), 3.72 (s, 6H, OMe<sub>B</sub>), 2.33 (s, 3H, OAc<sub>A</sub>), 1.96 (s, 3H, OAc <sub>$\gamma$</sub> ); <sup>13</sup>C NMR (CDCl<sub>3</sub>)  $\delta$  195.1 ( $\alpha$ ), 170.9 (OAc <sub>$\gamma$</sub> ), 168.6 (OAc<sub>A</sub>), 153.0 (OMe<sub>B</sub>), 151.3 (OMe<sub>A</sub>), 144.0 (4<sub>A</sub>), 136.1 (4<sub>B</sub>), 134.5 (1<sub>A</sub>), 124.4 (1<sub>B</sub>), 122.9 (6<sub>A</sub>), 122.8 (5<sub>A</sub>), 113.0 (2<sub>A</sub>), 105.2 (2<sub>B</sub>/6<sub>B</sub>), 82.1 ( $\beta$ ), 64.4 ( $\gamma$ ), 56.2 (OMe<sub>A</sub>), 56.0 (OMe<sub>B</sub>), 20.9 (OAc <sub>$\gamma$</sub> ), 20.8 (OAc<sub>A</sub>); HRMS(ESI)  $m/z$  calcd for [M+NH<sub>4</sub>]<sup>+</sup> = 450.1759, meas 450.1773.

**5<sub>SG-Ac</sub>** (407 mg, 94%), colorless oil: <sup>1</sup>H NMR (CDCl<sub>3</sub>)  $\delta$  7.49 (2<sub>A</sub>/6<sub>A</sub>), 6.99 (ddd,  $J = 7.8, 7.8, 1.3$  Hz, 1H, 1<sub>B</sub>), 6.93 (dd,  $J = 8.0, 1.6$  Hz, 1H, 5<sub>B</sub>), 6.88 (dd,  $J = 8.2, 1.4$  Hz, 1H, 2<sub>B</sub>), 6.84 (ddd,  $J = 7.7, 7.7, 1.5$  Hz, 1H, 6<sub>B</sub>), 5.64 (dd,  $J = 7.5, 3.6$  Hz, 1H,  $\beta$ ), 4.73 (dd,  $J = 12.0, 3.6$  Hz, 1H,  $\gamma$ ), 4.46 (dd,  $J = 12.0, 7.5$  Hz, 1H,  $\gamma$ ), 3.87 (s, 6H, OMe<sub>A</sub>), 3.76 (s, 3H, OMe<sub>B</sub>), 2.35 (OAc<sub>A</sub>), 2.07 (OAc <sub>$\gamma$</sub> ); <sup>13</sup>C NMR (CDCl<sub>3</sub>)  $\delta$  194.5 ( $\alpha$ ), 171.2 (OAc <sub>$\gamma$</sub> ), 168.3 (OAc<sub>A</sub>), 152.5 (OMe<sub>A</sub>), 150.3 (OMe<sub>B</sub>), 146.8 (4<sub>B</sub>), 133.4 (4<sub>A</sub>), 132.7 (1<sub>A</sub>), 123.7 (1<sub>B</sub>), 121.2 (6<sub>B</sub>), 118.1 (5<sub>B</sub>), 112.7 (2<sub>B</sub>), 105.9 (2<sub>A</sub>/6<sub>A</sub>), 80.6 ( $\beta$ ), 64.7 ( $\gamma$ ), 56.5 (OMe<sub>A</sub>), 55.9 (OMe<sub>B</sub>), 21.0 (OAc <sub>$\gamma$</sub> ), 20.6 (OAc<sub>A</sub>); HRMS(ESI)  $m/z$  calcd for [M+NH<sub>4</sub>]<sup>+</sup> = 450.1759, meas 450.1740.

**5<sub>SS-Ac</sub>** (254 mg, 92%), white solid: <sup>1</sup>H NMR (CDCl<sub>3</sub>)  $\delta$  7.49 (s, 2H, 2<sub>A</sub>/6<sub>A</sub>), 6.99 (t,  $J = 8.4$  Hz, 1H, 1<sub>B</sub>), 6.54 (d,  $J = 8.4$  Hz, 2H, 2<sub>B</sub>/6<sub>B</sub>), 5.46 ( $J = 6.4, 4.6$  Hz, 1H,  $\beta$ ), 4.61 (dd,  $J = 11.7, 4.6$  Hz, 1H,  $\gamma$ ), 4.53 (dd,  $J = 11.7, 6.4$  Hz, 1H,  $\gamma$ ), 3.85 (s, 6H, OMe<sub>A</sub>), 3.72 (s, 6H, OMe<sub>B</sub>), 2.35 (OAc<sub>A</sub>), 1.97 (OAc <sub>$\gamma$</sub> ); <sup>13</sup>C NMR (CDCl<sub>3</sub>)  $\delta$  194.8 ( $\alpha$ ), 171.0 (OAc <sub>$\gamma$</sub> ), 168.3 (OAc<sub>A</sub>), 153.1 (OMe<sub>B</sub>), 152.2 (OMe<sub>A</sub>), 135.9 (4<sub>B</sub>), 133.6 (1<sub>A</sub>), 133.1 (4<sub>A</sub>), 124.4 (1<sub>B</sub>), 106.3 (2<sub>A</sub>/6<sub>A</sub>), 105.3 (2<sub>B</sub>/6<sub>B</sub>), 81.7 ( $\beta$ ), 64.4 ( $\gamma$ ), 56.4 (OMe<sub>A</sub>), 56.0 (OMe<sub>B</sub>), 20.9 (OAc <sub>$\gamma$</sub> ), 20.6 (OAc<sub>A</sub>); HRMS(ESI)  $m/z$  calcd for [M+NH<sub>4</sub>]<sup>+</sup> = 480.1865, meas 480.1884.

**Procedure for reduction of  $\alpha$ -ketone:** The benzylic ketones in intermediates **5<sub>GG-Ac</sub>**-**5<sub>SS-SA</sub>** were reduced as usual to afford **6<sub>GG-Ac</sub>**-**6<sub>SS-SA</sub>** and used directly in the next reaction.<sup>3,7</sup>

**Procedure for deprotection of phenolic acetates:** Acetates **6<sub>GG-Ac</sub>**-**6<sub>SS-Ac</sub>** and trimers **6<sub>GG-pBA</sub>**-**6<sub>SS-SA</sub>** were deprotected as previously reported.<sup>3,6</sup>

**7<sub>GG-pBA</sub>** (40 mg, 51%), brittle white foam: (75:25 *erythro:threo*) <sup>1</sup>H NMR (acetone-*d*<sub>6</sub>)  $\delta$  7.76 (d,  $J = 8.8$  Hz, 2H, 2<sub>C,*t*}/6<sub>C,*t*}</sub>), 7.72 (d,  $J = 8.8$  Hz, 2H, 2<sub>C,*e*}/6<sub>C,*e*}</sub>), 7.18-7.14 (m, 3H, 2<sub>A,*e/t*}/5<sub>B,*t*}</sub>), 7.06 (d,  $J = 7.4$  Hz, 1H,</sub></sub></sub>

5<sub>B,e</sub>), 7.00-6.91 (m, 6H, 1<sub>B,e/t</sub>/2<sub>B,e/t</sub>/6<sub>A,e/t</sub>), 6.89-6.81 (m, 6H, 3<sub>C,e/t</sub>/5<sub>C,e/t</sub>/6<sub>B,e/t</sub>), 6.79 (d, J = 8.1 Hz, 1H, 5<sub>A,t</sub>), 6.79 (d, J = 8.1 Hz, 1H, 5<sub>A,e</sub>), 5.04-4.99 (m, 2H, α<sub>e/t</sub>), 4.75-4.71 (m, 1H, β<sub>e</sub>), 4.65-4.61 (m, 1H, β<sub>t</sub>), 4.57-4.43 (m, 3H, γ<sub>e/t</sub>), 4.18 (dd, J = 11.9, 6.1 Hz, 1H, γ<sub>t</sub>), 3.82 (s, 3H, OMe<sub>e</sub>), 3.80 (s, 3H, OMe<sub>t</sub>), 3.79 (s, 3H, OMe<sub>e</sub>), 3.76 (s, 3H, OMe<sub>e</sub>); <sup>13</sup>C NMR (acetone-*d*<sub>6</sub>) δ 166.44 (9<sub>e</sub>), 166.29 (9<sub>t</sub>), 152.07 (3<sub>B,e</sub>), 151.82 (3<sub>B,t</sub>), 149.34 (4<sub>B,t</sub>), 148.85 (4<sub>B,e</sub>), 148.06 (3<sub>A,t</sub>), 148.03 (3<sub>A,e</sub>), 146.93 (4<sub>A,t</sub>), 146.67 (4<sub>A,e</sub>), 133.68 (1<sub>A,e/t</sub>), 132.54 (2<sub>C,t</sub>/6<sub>C,t</sub>), 132.52 (2<sub>C,e</sub>/6<sub>C,e</sub>), 123.54 (1<sub>B,e/t</sub>), 122.32 (1<sub>C,e</sub>), 122.19 (1<sub>C,t</sub>), 121.76 (6<sub>B,t</sub>), 121.69 (6<sub>B,e</sub>), 120.56 (6<sub>A,t</sub>), 120.31 (6<sub>A,e</sub>), 119.78 (5<sub>B,e</sub>), 119.46 (5<sub>B,t</sub>), 115.89 (3<sub>C,t</sub>/5<sub>C,t</sub>), 115.80 (3<sub>C,e</sub>/5<sub>C,e</sub>), 115.27 (5<sub>A,t</sub>), 115.19 (5<sub>A,e</sub>), 113.59 (2<sub>B,e</sub>), 113.53 (2<sub>B,t</sub>), 111.41 (2<sub>A,t</sub>), 111.15 (2<sub>A,e</sub>), 84.55 (β<sub>t</sub>), 83.648 (β<sub>e</sub>), 73.99 (α<sub>t</sub>), 73.24 (α<sub>e</sub>), 64.51 (γ<sub>t</sub>), 64.30 (γ<sub>e</sub>), 56.18 (OMe<sub>e</sub>), 56.16 (OMe<sub>t</sub>), 56.13 (OMe<sub>e/t</sub>); HRMS(ESI) *m/z* calcd for [M+NH<sub>4</sub>]<sup>+</sup> = 458.1810, meas. 458.1808.

7<sub>GG-pCA</sub> (35 mg, 42%), white foam: (80:20 *erythro:threo*) <sup>1</sup>H NMR (acetone-*d*<sub>6</sub>) δ 7.54-7.46 (m, 5H, 7<sub>t</sub>/2<sub>C,e/t</sub>/6<sub>C,e/t</sub>), 7.44 (d, J = 16.0 Hz, 1H, 7<sub>e</sub>), 7.18-7.13 (m, 3H, 2<sub>A,e/t</sub>/5<sub>B,t</sub>), 7.06 (d, J = 8.0 Hz, 1H, 5<sub>B,e</sub>), 7.02-6.91 (m, 6H, 1<sub>B,e/t</sub>/2<sub>B,e/t</sub>/6<sub>A,e/t</sub>), 6.90-6.76 (m, 8H, 3<sub>C,e/t</sub>/5<sub>C,e/t</sub>/5<sub>A,e/t</sub>/6<sub>B,e/t</sub>), 6.31 (d, J = 16.0 Hz, 1H, 8<sub>t</sub>), 6.26 (d, J = 16.0 Hz, 1H, 8<sub>e</sub>), 5.00-4.95 (m, 2H, α<sub>e/t</sub>), 4.69-4.64 (m, 1H, β<sub>e</sub>), 4.61-4.58 (m, 2H, αOH<sub>e/t</sub>), 4.58-4.53 (m, 1H, β<sub>t</sub>), 4.46 (dd, J = 11.8, 6.8 Hz, 1H, γ<sub>e</sub>), 4.39 (dd, J = 11.9, 3.4 Hz, 1H, γ<sub>e</sub>), 4.36 (dd, J = 12.5, 4.0 Hz, 1H, γ<sub>t</sub>), 4.09 (dd, J = 11.9, 6.2 Hz, 1H, γ<sub>t</sub>), 3.85 (s, 3H, OMe<sub>t</sub>), 3.83 (s, 3H, OMe<sub>e</sub>), 3.82 (s, 3H, OMe<sub>e</sub>), 3.81 (s, 3H, OMe<sub>e</sub>); <sup>13</sup>C NMR (acetone-*d*<sub>6</sub>) δ 167.27 (9<sub>e</sub>), 167.16 (9<sub>t</sub>), 160.45 (4<sub>C,e/t</sub>), 152.06 (3<sub>B,e</sub>), 151.82 (3<sub>B,t</sub>), 149.39 (4<sub>B,t</sub>), 148.89 (4<sub>B,e</sub>), 148.02 (3<sub>A,t</sub>), 147.99 (3<sub>A,e</sub>), 146.74 (4<sub>A,t</sub>), 146.64 (4<sub>A,e</sub>), 145.57 (7<sub>t</sub>), 145.41 (7<sub>e</sub>), 133.76 (1<sub>A,e</sub>), 133.63 (1<sub>A,t</sub>), 131.00 (2<sub>C,t</sub>/6<sub>C,t</sub>), 130.95 (2<sub>C,e</sub>/6<sub>C,e</sub>), 126.95 (1<sub>C,e</sub>), 126.94 (1<sub>C,t</sub>), 123.57 (1<sub>B,t</sub>), 123.52 (1<sub>B,e</sub>), 121.81 (6<sub>B,t</sub>), 121.72 (6<sub>B,e</sub>), 120.56 (6<sub>A,t</sub>), 120.30 (6<sub>A,e</sub>), 119.69 (5<sub>B,e</sub>), 119.44 (5<sub>B,t</sub>), 116.66 (3<sub>C,t</sub>/5<sub>C,t</sub>), 116.58 (3<sub>C,e</sub>/5<sub>C,e</sub>), 115.38 (8<sub>e</sub>), 115.26 (8<sub>t</sub>), 115.25 (5<sub>A,t</sub>), 115.16 (5<sub>A,e</sub>), 113.59 (2<sub>B,e</sub>), 113.52 (2<sub>B,t</sub>), 111.39 (2<sub>A,t</sub>), 111.14 (2<sub>A,e</sub>), 84.59 (β<sub>t</sub>), 83.57 (β<sub>e</sub>), 73.25 (α<sub>t</sub>), 73.14 (α<sub>e</sub>), 64.21 (γ<sub>t</sub>), 64.00 (γ<sub>e</sub>), 56.23 (OMe<sub>t</sub>), 56.20 (OMe<sub>e</sub>), 56.18 (OMe<sub>e</sub>), 56.16 (OMe<sub>t</sub>); HRMS(ESI) *m/z* calcd for [M+NH<sub>4</sub>]<sup>+</sup> = 484.1966, meas. 484.1970.

7<sub>GG-FA</sub> (63 mg, 75%), white foam: (80:20 *erythro:threo*) <sup>1</sup>H NMR (acetone-*d*<sub>6</sub>) δ 7.49-7.47 (m, 2H, ArOH/7<sub>t</sub>), 7.41 (d, J = 16.0 Hz, 1H, 7<sub>e</sub>), 7.30 (d, J = 1.8 Hz, 1H, 2<sub>C,t</sub>), 7.27 (d, J = 1.8 Hz, 1H, 2<sub>C,e</sub>), 7.18-7.13 (m, 2H, 2<sub>A,t</sub>/5<sub>B,t</sub>), 7.15 (d, J = 1.8 Hz, 1H, 2<sub>A,e</sub>), 7.11 (dd, J = 8.1, 1.7 Hz, 1H, 6<sub>C,t</sub>), 7.09 (dd, J = 8.2, 1.8 Hz, 1H, 6<sub>C,e</sub>), 7.05 (dd, J = 7.9, 1.2 Hz, 1H, 5<sub>B,e</sub>), 7.03-6.91 (m, 4H, 1<sub>B,e/t</sub>, 2<sub>B,e/t</sub>), 6.93 (dd, J = 8.1, 1.6 Hz, 2H, 6<sub>A,e/t</sub>), 6.91-6.83 (m, 4H, 5<sub>C,e/t</sub>/6<sub>B,e/t</sub>), 6.80 (d, J = 8.1 Hz, 1H, 5<sub>A,t</sub>), 6.79 (d, J = 8.1 Hz, 1H, 5<sub>A,e</sub>), 6.35 (d, J = 15.9 Hz, 1H, 8<sub>t</sub>), 6.30 (d, J = 15.9 Hz, 1H, 8<sub>e</sub>), 5.00-4.95 (m, 2H, α<sub>e/t</sub>), 4.69-4.64 (m, 1H, β<sub>e</sub>), 4.58-4.53 (m, 1H, β<sub>t</sub>), 4.46 (dd, J = 11.8, 6.7 Hz, 1H, γ<sub>e</sub>), 4.40 (dd, J = 11.8, 3.4 Hz, 1H, γ<sub>e</sub>), 4.36 (dd, J = 11.9, 3.4 Hz, 1H, γ<sub>t</sub>), 4.09 (dd, J = 12.0, 6.2 Hz, 1H, γ<sub>t</sub>), 3.92 (s, 6H, OMe<sub>C,e/t</sub>), 3.85 (s, 3H,

OMe<sub>t</sub>), 3.83 (s, 3H, OMe<sub>e</sub>), 3.82 (s, 3H, OMe<sub>t</sub>), 3.81 (s, 3H, OMe<sub>e</sub>); <sup>13</sup>C NMR (acetone-*d*<sub>6</sub>) δ 167.30 (9<sub>e</sub>), 166.88 (9<sub>t</sub>), 152.03 (3<sub>B,e</sub>), 152.00 (3<sub>B,t</sub>), 149.96 (4<sub>C,e</sub>), 149.94 (4<sub>C,t</sub>), 148.85 (4<sub>B,e/t</sub>), 148.75 (3<sub>C,t</sub>), 148.66 (3<sub>C,e</sub>), 148.00 (3<sub>A,e</sub>), 147.98 (3<sub>A,t</sub>), 146.64 (4<sub>A,e</sub>), 145.94 (4<sub>A,t</sub>), 145.94 (7<sub>t</sub>), 145.78 (7<sub>e</sub>), 133.64 (1<sub>A,e/t</sub>), 127.36 (1<sub>C,e</sub>), 126.61 (1<sub>C,t</sub>), 123.97 (6<sub>C,t</sub>), 123.93 (6<sub>C,e</sub>), 123.53 (1<sub>B,t</sub>), 123.51 (1<sub>B,e</sub>), 121.81 (6<sub>B,t</sub>), 121.71 (6<sub>B,e</sub>), 120.28 (6<sub>A,e</sub>), 120.25 (6<sub>A,t</sub>), 119.57 (5<sub>B,e</sub>), 119.30 (5<sub>B,t</sub>), 116.40 (5<sub>C,t</sub>), 115.96 (5<sub>C,e</sub>), 115.57 (8<sub>e</sub>), 115.46 (8<sub>t</sub>), 115.24 (5<sub>A,t</sub>), 115.17 (5<sub>A,e</sub>), 113.58 (2<sub>B,e</sub>), 113.55 (2<sub>B,t</sub>), 111.39 (2<sub>C,t</sub>), 111.29 (2<sub>A,t</sub>), 111.22 (2<sub>C,e</sub>), 111.14 (2<sub>A,e</sub>), 83.51 (β<sub>t</sub>), 83.48 (β<sub>e</sub>), 73.77 (α<sub>t</sub>), 73.10 (α<sub>e</sub>), 64.17 (γ<sub>t</sub>), 63.95 (γ<sub>e</sub>), 56.29 (OMe), 56.19 (OMe), 56.18 (OMe), 56.18 (OMe), 56.16 (OMe), 56.13 (OMe); HRMS(ESI) *m/z* calcd for [M+NH<sub>4</sub>]<sup>+</sup> = 514.2072, meas. 514.2079.

7<sub>GG-SA</sub> (156 mg, 90%), white foam: (80:20 *erythro:threo*) <sup>1</sup>H NMR (acetone-*d*<sub>6</sub>) δ 7.80 (s, 1H, ArOH<sub>t</sub>), 7.79 (s, 1H, ArOH<sub>e</sub>), 7.53 (s, 1H, ArOH<sub>t</sub>), 7.48 (s, 1H, ArOH<sub>e</sub>), 7.43 (d, J = 15.9 Hz, 1H, 7<sub>t</sub>), 7.38 (d, J = 15.9 Hz, 1H, 7<sub>e</sub>), 7.18-7.12 (m, 2H, 2<sub>A,t</sub>/5<sub>B,t</sub>), 7.15 (d, J = 1.7 Hz, 1H, 2<sub>A,e</sub>), 7.05 (dd, J = 7.9, 1.3 Hz, 1H, 5<sub>B,e</sub>), 7.04-6.89 (m, 10H, 1<sub>B,e/t</sub>/2<sub>B,e/t</sub>/6<sub>A,e/t</sub>/2<sub>C,e/t</sub>/6<sub>C,e/t</sub>), 6.88-6.83 (m, 2H, 6<sub>B,e/t</sub>), 6.80 (d, J = 8.1 Hz, 1H, 5<sub>A,t</sub>), 6.79 (d, J = 8.1 Hz, 1H, 5<sub>A,e</sub>), 6.38 (d, J = 15.9 Hz, 1H, 8<sub>t</sub>), 6.32 (d, J = 15.9 Hz, 1H, 8<sub>e</sub>), 5.01-4.95 (m, 2H, α<sub>e/t</sub>), 4.69-4.65 (m, 1H, β<sub>e</sub>), 4.60 (d, J = 4.4 Hz, 2H, αOH<sub>e/t</sub>), 4.58-4.54 (m, 1H, β<sub>t</sub>), 4.46 (dd, J = 11.9, 6.6 Hz, 1H, γ<sub>e</sub>), 4.40 (dd, J = 11.8, 3.5 Hz, 1H, γ<sub>e</sub>), 4.35 (dd, J = 11.9, 3.5 Hz, 1H, γ<sub>t</sub>), 4.09 (dd, J = 11.9, 6.1 Hz, 1H, γ<sub>t</sub>), 3.89 (s, 12H, OMe<sub>C,e/t</sub>), 3.85 (s, 3H, OMe<sub>t</sub>), 3.83 (s, 3H, OMe<sub>e</sub>), 3.82 (s, 3H, OMe<sub>t</sub>), 3.81 (s, 3H, OMe<sub>e</sub>); <sup>13</sup>C NMR (acetone-*d*<sub>6</sub>) δ 167.27 (9<sub>e</sub>), 166.91 (9<sub>t</sub>), 152.02 (3<sub>B,e</sub>), 151.77 (3<sub>B,t</sub>), 148.87 (3<sub>C,t</sub>/5<sub>C,t</sub>), 148.85 (3<sub>C,e</sub>/5<sub>C,e</sub>), 148.02 (3<sub>A,t</sub>), 148.00 (3<sub>A,e</sub>), 146.67 (4<sub>A,e/t</sub>), 146.28 (7<sub>t</sub>), 146.12 (7<sub>e</sub>), 133.65 (1<sub>A,e/t</sub>), 126.06 (1<sub>C,e/t</sub>), 123.52 (1<sub>B,t</sub>), 123.47 (1<sub>B,e</sub>), 121.71 (6<sub>B,e</sub>), 121.70 (6<sub>B,t</sub>), 120.27 (6<sub>A,e</sub>), 120.24 (6<sub>A,t</sub>), 119.61 (5<sub>B,t</sub>), 119.53 (5<sub>B,e</sub>), 116.72 (8<sub>t</sub>), 116.69 (8<sub>e</sub>), 115.92 (5<sub>A,t</sub>), 115.81 (5<sub>A,e</sub>), 115.18 (2<sub>B,e</sub>), 115.17 (2<sub>B,t</sub>), 113.58 (2<sub>A,e</sub>), 113.54 (2<sub>A,t</sub>), 111.14 (2<sub>C,e</sub>/6<sub>C,t</sub>), 111.11 (2<sub>C,t</sub>/6<sub>C,t</sub>), 106.77 (4<sub>C,t</sub>), 106.71 (4<sub>C,e</sub>), 83.57 (β<sub>t</sub>), 83.44 (β<sub>e</sub>), 73.76 (α<sub>t</sub>), 73.01 (α<sub>e</sub>), 63.94 (γ<sub>e</sub>), 64.17 (γ<sub>t</sub>), 56.63 (OMe<sub>C,e</sub>), 56.54 (OMe<sub>C,t</sub>), 56.50 (OMe<sub>t</sub>), 56.19 (OMe), 56.18 (OMe); HRMS(ESI) *m/z* calcd for [M+NH<sub>4</sub>]<sup>+</sup> = 544.2178, meas. 544.2171.

7<sub>GG-Ac</sub> (36 mg, 50%), colorless oil: (80:20 *erythro:threo*) <sup>1</sup>H NMR (acetone-*d*<sub>6</sub>) δ 7.57 (s, 1H, ArOH<sub>t</sub>), 7.52 (s, 1H, ArOH<sub>e</sub>), 7.12-7.09 (m, 3H, 2<sub>A,e/t</sub>/5<sub>B,t</sub>), 7.03-6.99 (m, 2H, 5<sub>B,e</sub>/2<sub>B,t</sub>), 6.99-6.96 (m, 2H, 2<sub>B,e</sub>/1<sub>B,t</sub>), 6.96-6.92 (m, 2H, 1<sub>B,e</sub>/6<sub>A,t</sub>), 6.92-6.86 (m, 2H, 6<sub>A,e</sub>/6<sub>B,t</sub>), 6.86-6.82 (m, 1H, 6<sub>B,e</sub>), 6.80-6.76 (m, 2H, 5<sub>A,e/t</sub>); <sup>13</sup>C NMR (acetone-*d*<sub>6</sub>) δ 170.92 (OAc<sub>γ,e</sub>), 170.80 (OAc<sub>γ,t</sub>), 152.00 (3<sub>B,e</sub>), 151.72 (3<sub>B,t</sub>), 149.30 (4<sub>B,t</sub>), 148.75 (4<sub>B,e</sub>), 148.02 (3<sub>A,t</sub>), 147.98 (3<sub>A,e</sub>), 146.90 (4<sub>A,t</sub>), 146.62 (4<sub>A,e</sub>), 133.53 (1<sub>A,e</sub>), 133.05 (1<sub>A,t</sub>), 123.55 (1<sub>B,t</sub>), 123.52 (1<sub>B,e</sub>), 121.81 (6<sub>B,t</sub>), 121.71 (6<sub>B,e</sub>), 120.49 (6<sub>A,t</sub>), 120.20 (6<sub>A,e</sub>), 119.55 (5<sub>B,e</sub>), 119.25 (5<sub>B,t</sub>), 115.22 (A<sub>5,t</sub>), 115.16 (A<sub>5,e</sub>), 113.60 (2<sub>B,e</sub>), 113.52 (2<sub>B,t</sub>), 111.33 (2<sub>A,t</sub>), 111.07 (2<sub>A,e</sub>), 84.30

( $\beta_t$ ), 83.33 ( $\beta_e$ ), 73.59 ( $\alpha_t$ ), 73.09 ( $\alpha_e$ ), 64.14 ( $\gamma_t$ ), 63.88 ( $\gamma_e$ ), 56.22 (OMe), 56.20 (OMe), 56.17 (OMe), 20.68 (OAc<sub>e</sub>), 20.65 (OAc<sub>t</sub>); HRMS(ESI)  $m/z$  calcd for  $[M+NH_4]^+$  = 380.1704, meas. 380.1692.

**7<sub>GS-pBA</sub>** (90 mg, 71%), white foam: (45:65 *erythro:threo*) <sup>1</sup>H NMR (acetone-*d*<sub>6</sub>)  $\delta$  9.19 (s, 1H, ArOH<sub>t</sub>), 9.15 (s, 1H, ArOH<sub>e</sub>), 7.78 (d, J = 8.6 Hz, 2H, 2C<sub>t</sub>/6C<sub>t</sub>), 7.70 (d, J = 8.7 Hz, 2H, 2C<sub>e</sub>/6C<sub>e</sub>), 7.51 (s, 1H, ArOH<sub>t</sub>), 7.49 (s, 1H, ArOH<sub>e</sub>), 7.08 (d, J = 1.5 Hz, 1H, 2A<sub>e</sub>), 7.06 (d, J = 1.6 Hz, 1H, 2A<sub>t</sub>), 7.03 (t, J = 8.4 Hz, 1H, 1B<sub>e</sub>), 7.02 (t, J = 8.4 Hz, 1H, 1B<sub>t</sub>), 6.93 (dd, J = 8.1, 1.7 Hz, 1H, 6A<sub>t</sub>), 6.89 (d, J = 8.7 Hz, 2H, 3C<sub>t</sub>/5C<sub>t</sub>), 6.87-6.83 (m, 3H, 3C<sub>e</sub>/5C<sub>e</sub>/6A<sub>e</sub>), 6.79 (d, J = 8.1 Hz, 1H, 5A<sub>e</sub>), 6.76 (d, J = 8.1 Hz, 1H, 5A<sub>t</sub>), 6.69 (d, J = 8.4 Hz, 2H, 2B<sub>e</sub>/6B<sub>e</sub>), 6.68 (d, J = 8.5 Hz, 1H, 2B<sub>t</sub>/6B<sub>t</sub>), 5.06 (dd, J = 7.3, 3.4 Hz, 1H,  $\alpha_t$ ), 5.01-4.97 (m, 1H,  $\alpha_e$ ), 4.64 (d, J = 2.8 Hz, 1H,  $\alpha$ OH<sub>t</sub>), 4.63-4.60 (m, 1H,  $\beta_e$ ), 4.58-4.51 (m, 2H,  $\gamma_{e/t}$ ), 4.48 (d, J = 3.7 Hz, 1H), 4.34-4.28 (m, 2H,  $\beta_t/\gamma_e$ ), 4.10 (dd, J = 11.9, 4.3 Hz, 1H,  $\gamma_t$ ), 3.81 (s, 3H, OMe<sub>A,e</sub>), 3.79 (s, 6H, OMe<sub>B,t</sub>), 3.78 (s, 6H, OMe<sub>B,e</sub>), 3.74 (s, 3H, OMe<sub>A,t</sub>); <sup>13</sup>C NMR (acetone-*d*<sub>6</sub>)  $\delta$  166.40 (9<sub>e</sub>), 166.25 (9<sub>t</sub>), 162.50 (4C<sub>t</sub>), 162.38 (4C<sub>e</sub>), 154.53 (3B<sub>e</sub>/5B<sub>e</sub>), 154.04 (3B<sub>t</sub>/5B<sub>t</sub>), 148.09 (3A<sub>e</sub>), 147.96 (3A<sub>t</sub>), 146.88 (4A<sub>t</sub>), 146.45 (4A<sub>e</sub>), 137.79 (4B<sub>t</sub>), 136.50 (4B<sub>e</sub>), 133.01 (1A<sub>t</sub>), 132.66 (1A<sub>e</sub>), 132.51 (2C<sub>t</sub>/6C<sub>t</sub>), 132.49 (2C<sub>e</sub>/6C<sub>e</sub>), 124.76 (1B<sub>e</sub>), 124.71 (1B<sub>t</sub>), 122.56 (1C<sub>e</sub>), 122.42 (1C<sub>t</sub>), 120.65 (6A<sub>t</sub>), 119.61 (6A<sub>e</sub>), 115.87 (3C<sub>t</sub>/5C<sub>t</sub>), 115.71 (3C<sub>e</sub>/5C<sub>e</sub>), 115.34 (5A<sub>e</sub>), 115.28 (5A<sub>t</sub>), 111.40 (2A<sub>t</sub>), 110.50 (2A<sub>e</sub>), 106.29 (2B<sub>t</sub>/6B<sub>t</sub>), 106.22 (2B<sub>e</sub>/6B<sub>e</sub>), 86.91 ( $\beta_t$ ), 84.53 ( $\beta_e$ ), 74.68 ( $\alpha_t$ ), 72.90 ( $\alpha_e$ ), 64.99 ( $\gamma_t$ ), 63.75 ( $\gamma_e$ ), 56.36 (OMe<sub>B,e/t</sub>), 56.17 (OMe<sub>A,e</sub>), 56.07 (OMe<sub>A,t</sub>); HRMS(ESI)  $m/z$  calcd for  $[M+NH_4]^+$  = 488.1916, meas. 488.1911.

**7<sub>GS-pCA</sub>** (125 mg, 74%), white foam: (50:50 *erythro:threo*) <sup>1</sup>H NMR (acetone-*d*<sub>6</sub>)  $\delta$  7.55 (d, J = 8.7 Hz, 2H, 2C<sub>t</sub>/6C<sub>t</sub>), 7.49 (d, J = 8.6 Hz, 2H, 2C<sub>e</sub>/6C<sub>e</sub>), 7.46 (d, J = 16 Hz, 1H, 7<sub>t</sub>), 7.38 (d, J = 16.0 Hz, 1H, 7<sub>e</sub>), 7.07 (d, J = 1.6 Hz, 1H, 2A<sub>e</sub>), 7.06 (d, J = 1.8 Hz, 1H, 2A<sub>t</sub>), 7.04 (t, J = 8.4 Hz, 1H, 1B<sub>e/t</sub>), 7.03 (t, J = 8.4 Hz, 1H, 1B<sub>e/t</sub>), 6.92 (dd, J = 8.5, 2.2 Hz, 1H, 6A<sub>t</sub>), 6.91-6.86 (m, 4H, 3C<sub>e/t</sub>/5C<sub>e/t</sub>), 6.84 (dd, J = 8.0, 1.5 Hz, 1H, 6A<sub>e</sub>), 6.80 (d, J = 8.1 Hz, 1H, 5A<sub>e</sub>), 6.77 (d, J = 8.1 Hz, 1H, 5A<sub>t</sub>), 6.71 (d, J = 8.4 Hz, 1H, 2B<sub>e/t</sub>/6B<sub>e/t</sub>), 6.70 (d, J = 8.4 Hz, 1H, 2B<sub>e/t</sub>/6B<sub>e/t</sub>), 6.33 (d, J = 16.0 Hz, 1H, 8<sub>t</sub>), 6.21 (d, J = 16.0 Hz, 1H, 8<sub>e</sub>), 5.01 (dd, J = 7.3, 4.0 Hz, 1H,  $\alpha_t$ ), 4.97-4.93 (m, 1H,  $\alpha_e$ ), 4.60 (d, J = 2.8 Hz, 1H,  $\alpha$ OH<sub>t</sub>), 4.59-4.55 (m, 1H,  $\beta_e$ ), 4.49-4.42 (m, 2H,  $\gamma_{e/t}$ ), 4.26-4.23 (m, 1H,  $\beta_t$ ), 4.21 (dd, J = 11.8, 3.3 Hz, 1H,  $\gamma_e$ ), 4.01 (dd, J = 12.0, 4.3 Hz, 1H,  $\gamma_t$ ), 3.84 (s, 12H, OMe<sub>B,e/t</sub>), 3.84 (OMe<sub>B,e/t</sub>), 3.79 (OMe<sub>B,e/t</sub>); <sup>13</sup>C NMR (acetone-*d*<sub>6</sub>)  $\delta$  167.17 (9<sub>e</sub>), 167.10 (9<sub>t</sub>), 160.46 (4C<sub>e/t</sub>), 160.39 (4C<sub>e/t</sub>), 154.55 (3B<sub>e/t</sub>/5B<sub>e/t</sub>), 154.03 (3B<sub>e/t</sub>/5B<sub>e/t</sub>), 148.04 (3A<sub>e/t</sub>), 147.93 (3A<sub>e/t</sub>), 146.85 (4A<sub>e/t</sub>), 146.42 (4A<sub>e/t</sub>), 145.24 (7<sub>t</sub>), 145.01 (7<sub>e</sub>), 137.82 (4B<sub>e/t</sub>), 136.46 (4B<sub>e/t</sub>), 133.87, 133.03 (1A<sub>t</sub>), 132.63 (1A<sub>e</sub>), 130.97 (2C<sub>t</sub>/6C<sub>t</sub>), 130.86 (2C<sub>e</sub>/6C<sub>e</sub>), 126.99 (1C<sub>e/t</sub>), 124.79 (1B<sub>e/t</sub>), 124.73 (1B<sub>e/t</sub>), 120.65 (6A<sub>t</sub>), 119.64 (6A<sub>e</sub>), 116.57 (3C<sub>e/t</sub>/5C<sub>e/t</sub>), 115.68 (8<sub>e</sub>), 115.52 (8<sub>t</sub>), 115.31 (5A<sub>e/t</sub>), 115.25 (5A<sub>e/t</sub>), 111.38 (2A<sub>t</sub>), 110.51 (2A<sub>e</sub>), 106.28 (2B<sub>e/t</sub>/6B<sub>e/t</sub>), 86.93 ( $\beta_t$ ), 84.43 ( $\beta_e$ ), 74.47 ( $\alpha_t$ ),

72.87 ( $\alpha_e$ ), 64.74 ( $\gamma_t$ ), 63.56 ( $\gamma_e$ ), 56.46 (OMe<sub>B,e/t</sub>), 56.41 (OMe<sub>B,e/t</sub>), 56.18 (OMe<sub>A,t</sub>), 56.13 (OMe<sub>A,e</sub>); HRMS(ESI)  $m/z$  calcd for  $[M+NH_4]^+$  = 514.2072, meas. 514.2068.

**7<sub>GS-FA</sub>** (107 mg, 55%), white foam: (50:50 *erythro:threo*) <sup>1</sup>H NMR (acetone-*d*<sub>6</sub>)  $\delta$  8.17 (s, 1H, ArOH), 8.14 (s, 1H, ArOH), 7.50 (s, 1H, ArOH), 7.48 (s, 1H, ArOH), 7.44 (d, J = 16.0 Hz, 1H, 7<sub>t</sub>), 7.36 (d, J = 16.0 Hz, 7<sub>e</sub>), 7.33 (d, J = 1.8 Hz, 1H, 2<sub>C,t</sub>), 7.26 (d, J = 1.9 Hz, 1H, 2<sub>C,e</sub>), 7.14 (dd, J = 8.2, 1.9 Hz, 1H, 6<sub>C,t</sub>), 7.08 (dd, J = 8.2, 1.9 Hz, 1H, 6<sub>C,e</sub>), 7.07 (d, J = 2.2 Hz, 1H, 2<sub>A,e</sub>), 7.06-7.01 (m, 3H, 1<sub>B,e/t</sub>/2<sub>A,t</sub>), 6.91 (dd, J = 8.1, 1.8 Hz, 1H, 6<sub>A,t</sub>), 6.87 (d, J = 8.2 Hz, 1H, 5<sub>C,t</sub>), 6.85 (d, J = 8.2 Hz, 5<sub>C,e</sub>), 6.84 (dd, J = 8.1, 1.7 Hz, 1H, 6<sub>A,e</sub>), 6.80 (d, J = 8.2 Hz, 1H, 5<sub>A,e</sub>), 6.77 (d, J = 8.1 Hz, 1H, 5<sub>A,t</sub>), 6.73-6.70 (m, 4H, 2<sub>B,e/t</sub>/6<sub>B,e/t</sub>), 6.37 (d, J = 16.0 Hz, 1H, 8<sub>t</sub>), 6.24 (d, J = 16.0 Hz, 1H, 8<sub>e</sub>), 5.00 (dd, J = 7.4, 4.2 Hz, 1H,  $\alpha_t$ ), 4.97-4.94 (m, 1H,  $\alpha_e$ ), 4.61 (d, J = 2.8 Hz, 1H,  $\alpha$ OH<sub>t</sub>), 4.59-4.55 (m, 1H,  $\beta_e$ ), 4.48-4.42 (m, 2H,  $\alpha$ OH<sub>e</sub>/ $\gamma$ <sub>e/t</sub>), 4.23-4.20 (m, 2H,  $\beta_t$ / $\gamma_e$ ), 4.01 (dd, J = 11.9, 4.0 Hz, 1H,  $\gamma_t$ ), 3.93 (s, 3H, OMe<sub>C</sub>), 3.92 (s, 3H, OMe<sub>C</sub>), 3.85 (s, 12H, OMe<sub>B,e/t</sub>), 3.84 (s, 3H, OMe<sub>A</sub>), 3.79 (s, 3H, OMe<sub>A</sub>); <sup>13</sup>C NMR (acetone-*d*<sub>6</sub>)  $\delta$  167.16 (9<sub>e</sub>), 167.11 (9<sub>t</sub>), 154.55 (3<sub>B</sub>/5<sub>B</sub>), 154.02 (3<sub>B</sub>/5<sub>B</sub>), 149.85 (4<sub>C,e/t</sub>), 148.68 (3<sub>C</sub>), 148.66 (3<sub>C</sub>), 147.85 (3<sub>A,e/t</sub>), 146.41 (4<sub>A,e/t</sub>), 145.59 (7<sub>t</sub>), 145.34 (7<sub>e</sub>), 137.17 (4<sub>B,e/t</sub>), 132.64 (1<sub>A,e/t</sub>), 127.68 (1<sub>C</sub>), 127.44 (1<sub>C</sub>), 124.79 (1<sub>B</sub>), 124.74 (1<sub>B</sub>), 123.94 (6<sub>C,t</sub>), 123.78 (6<sub>C,e</sub>), 120.65 (6<sub>A,t</sub>), 119.64 (6<sub>A,e</sub>), 115.97 (5<sub>C,e/t</sub>), 115.92 (8<sub>e</sub>), 115.74 (8<sub>t</sub>), 115.30 (5<sub>A</sub>), 115.25 (5<sub>A</sub>), 111.38 (2<sub>A,t</sub>), 111.26 (2<sub>C,t</sub>), 111.19 (2<sub>C,e</sub>), 110.50 (2<sub>A,e</sub>), 106.28 (2<sub>B,e/t</sub>/6<sub>B,e/t</sub>), 87.00 ( $\beta_t$ ), 84.42 ( $\beta_e$ ), 74.51 ( $\alpha_t$ ), 72.84 ( $\alpha_e$ ), 64.69 ( $\gamma_t$ ), 63.49 ( $\gamma_e$ ), 56.46 (OMe<sub>B</sub>), 56.41 (OMe<sub>B</sub>), 56.31 (OMe<sub>C</sub>), 56.28 (OMe<sub>C</sub>), 56.18 (OMe<sub>A</sub>), 56.14 (OMe<sub>A</sub>); HRMS(ESI)  $m/z$  calcd for  $[M+NH_4]^+$  = 544.2178, meas. 544.2180.

**7<sub>GS-SA</sub>** (175 mg, 90%), white foam: (50:50 *erythro:threo*) <sup>1</sup>H NMR (acetone-*d*<sub>6</sub>)  $\delta$  7.79 (s, 1H, ArOH), 7.77 (s, 1H, ArOH), 7.51 (s, 1H, ArOH), 7.48 (s, 1H, ArOH), 7.42 (d, J = 16.0 Hz, 1H, 7<sub>t</sub>), 7.32 (d, J = 15.9 Hz, 1H, 7<sub>e</sub>), 7.08-7.02 (m, 4H, 2<sub>A,e/t</sub>/1<sub>B,e/t</sub>), 7.01 (s, 2H, 2<sub>C,t</sub>/6<sub>C,t</sub>), 6.94 (s, 2H, 2<sub>C,e</sub>/6<sub>C,e</sub>), 6.91 (dd, J = 8.1, 1.7 Hz, 1H, 6<sub>A,t</sub>), 6.85 (dd, J = 8.2, 1.4 Hz, 1H, 6<sub>A,e</sub>), 6.80 (d, J = 8.1 Hz, 1H, 5<sub>A,e</sub>), 6.78 (d, J = 8.1 Hz, 1H, 5<sub>A,t</sub>), 6.74-6.70 (m, 4H, 2<sub>B,e/t</sub>/6<sub>B,e/t</sub>), 6.39 (d, J = 15.9 Hz, 1H, 8<sub>t</sub>), 6.26 (d, J = 15.9 Hz, 1H, 8<sub>e</sub>), 5.02-4.98 (m, 1H,  $\alpha_t$ ), 4.97-4.94 (m, 1H,  $\alpha_e$ ), 4.61 (d, J = 2.7 Hz, 1H,  $\alpha$ OH<sub>t</sub>), 4.59-4.55 (m, 1H,  $\beta_e$ ), 4.48-4.42 (m, 2H,  $\gamma$ <sub>e/t</sub>), 4.23 (d, J = 11.8, 3.6 Hz, 1H,  $\gamma_e$ ), 4.23-4.19 (m, 1H,  $\beta_t$ ), 4.02 (dd, J = 11.9, 4 Hz, 1H,  $\gamma_t$ ), 3.90 (s, 6H, OMe<sub>C</sub>), 3.89 (s, 6H, OMe<sub>C</sub>), 3.85 (s, 12H, OMe<sub>B,e/t</sub>), 3.84 (s, 3H, OMe<sub>A</sub>), 3.79 (s, 3H, OMe<sub>A</sub>); <sup>13</sup>C NMR (acetone-*d*<sub>6</sub>)  $\delta$  167.11 (9<sub>e</sub>), 167.07 (9<sub>t</sub>), 154.55 (3<sub>B</sub>/5<sub>B</sub>), 154.02 (3<sub>B</sub>/5<sub>B</sub>), 148.83 (3<sub>C,e/t</sub>/5<sub>C,e/t</sub>), 148.05 (3<sub>A</sub>), 147.95 (3<sub>A</sub>), 146.86 (4<sub>A,t</sub>), 146.41 (4<sub>A,e</sub>), 145.92 (7<sub>t</sub>), 145.66 (7<sub>e</sub>), 139.80 (4<sub>C,e/t</sub>), 137.80 (4<sub>B</sub>), 136.45 (4<sub>B</sub>), 132.66 (1<sub>A,e/t</sub>), 126.14 (1<sub>C,e/t</sub>), 124.78 (1<sub>B</sub>), 124.74 (1<sub>B</sub>), 120.67 (6<sub>A,t</sub>), 119.63 (6<sub>A,e</sub>), 116.17 (8<sub>e</sub>), 115.99 (8<sub>t</sub>), 115.30 (5<sub>A</sub>), 115.27 (5<sub>A</sub>), 111.39 (2<sub>A,t</sub>), 110.50 (2<sub>A,e</sub>), 106.74 (2<sub>C,t</sub>/6<sub>C,t</sub>), 106.62 (2<sub>C,e</sub>/6<sub>C,e</sub>), 106.28 (2<sub>B,e/t</sub>/6<sub>B,e/t</sub>), 87.05 ( $\beta_t$ ), 84.43 ( $\beta_e$ ), 74.56 ( $\alpha_t$ ), 72.84 ( $\alpha_e$ ), 64.68 ( $\gamma_t$ ),

63.45 ( $\gamma_e$ ), 56.65 (OMe<sub>C</sub>), 56.62 (OMe<sub>C</sub>), 56.53 (OMe<sub>A</sub>), 56.46 (OMe<sub>B</sub>), 56.41 (OMe<sub>B</sub>), 56.19 (OMe<sub>A</sub>); HRMS(ESI)  $m/z$  calcd for  $[M+NH_4]^+$  = 574.2283, meas. 574.2259.

**7<sub>GS-Ac</sub>** (134 mg, 67%), white foam: (50:50 *erythro:threo*) <sup>1</sup>H NMR (acetone-*d*<sub>6</sub>)  $\delta$  7.06-7.00 (m, 4H, 1<sub>B,e/t</sub>/2<sub>A,e/t</sub>), 6.88 (dd, J = 8.1, 1.8 Hz, 1H, 6<sub>A,t</sub>), 6.81-6.76 (m, 2H, 5<sub>A,e</sub>/6<sub>A,e</sub>), 6.76 (d, J = 8.1 Hz, 1H, 5<sub>A,t</sub>), 6.71 (t, J = 8 Hz, 4H, 2<sub>B,e/t</sub>/6<sub>B,e/t</sub>), 4.94-4.90 (m, 1H,  $\alpha_t$ ), 4.90-4.87 (m, 1H,  $\alpha_e$ ), 4.57 (s, 1H,  $\alpha$ OH), 4.56 (s, 1H,  $\alpha$ OH), 4.52-4.48 (m, 1H,  $\beta_e$ ), 4.36-4.32 (m, 2H,  $\gamma_{e/t}$ ), 4.19-4.15 (m, 1H,  $\beta_t$ ), 4.06 (dd, J = 11.8, 3.5 Hz, 1H,  $\gamma_e$ ), 3.88 (dd, J = 11.9, 4.0 Hz, 1H,  $\gamma_t$ ), 3.86 (s, 6H, OMe<sub>B</sub>), 3.85 (s, 6H, OMe<sub>B</sub>), 3.83 (s, 3H, OMe<sub>A</sub>), 3.81 (s, 3H, OMe<sub>A</sub>), 1.94 (s, 3H, OAc<sub>t</sub>), 1.86 (s, 3H, OAc<sub>e</sub>); <sup>13</sup>C NMR (acetone-*d*<sub>6</sub>)  $\delta$  170.81 (OAc<sub>e</sub>), 170.72 (OAc<sub>t</sub>), 154.54 (3<sub>B,e</sub>/5<sub>B,e</sub>), 153.97 (3<sub>B,t</sub>/5<sub>B,t</sub>), 148.03 (3<sub>A,e</sub>), 147.47 (3<sub>A,t</sub>), 146.79 (4<sub>A,t</sub>), 146.30 (4<sub>A,e</sub>), 137.78 (4<sub>B,t</sub>), 136.27 (4<sub>B,e</sub>), 132.98 (1<sub>A,t</sub>), 132.46 (1<sub>A,e</sub>), 124.84 (1<sub>B,e</sub>), 124.74 (1<sub>B,t</sub>), 120.61 (6<sub>A,t</sub>), 119.55 (6<sub>A,e</sub>), 115.29 (5<sub>A,e</sub>), 115.22 (5<sub>A,t</sub>), 111.28 (2<sub>A,t</sub>), 110.41 (2<sub>A,e</sub>), 106.36 (2<sub>B</sub>/6<sub>B</sub>), 106.31 (2<sub>B</sub>/6<sub>B</sub>), 86.63 ( $\beta_t$ ), 84.11 ( $\beta_e$ ), 74.32 ( $\alpha_t$ ), 72.62 ( $\alpha_e$ ), 64.63 ( $\gamma_t$ ), 63.37 ( $\gamma_e$ ), 56.49 (OMe<sub>B</sub>), 56.41 (OMe<sub>B</sub>), 56.16 (OMe<sub>A</sub>), 56.15 (OMe<sub>A</sub>), 20.68 (OAc<sub>e</sub>), 20.63 (OAc<sub>t</sub>); HRMS(ESI)  $m/z$  calcd for  $[M+NH_4]^+$  = 410.1810, meas. 410.1815.

**7<sub>SG-pBA</sub>** (69 mg, 46%), white foam: (75:25 *erythro:threo*) <sup>1</sup>H NMR (acetone-*d*<sub>6</sub>)  $\delta$  7.79 (d, J = 8.9 Hz, 2H, 2<sub>C,t</sub>/6<sub>C,t</sub>), 7.73 (d, J = 8.8 Hz, 2H, 8.8 Hz, 2<sub>C,e</sub>/6<sub>C,e</sub>), 7.17 (dd, J = 8.0, 1.3 Hz, 1H, 5<sub>B,t</sub>), 7.08-7.04 (m, 1H, 5<sub>B,e</sub>), 7.01-6.92 (m, 4H, 1<sub>B,e/t</sub>/2<sub>B,e/t</sub>), 6.90-6.80 (m, 10H, 2<sub>A,e/t</sub>/6<sub>A,e/t</sub>/3<sub>C,e/t</sub>/5<sub>C,e/t</sub>/6<sub>B,e/t</sub>), 5.03-5.00 (m, 2H,  $\alpha_{e/t}$ ), 4.78-4.73 (m, 1H,  $\beta_e$ ), 4.67-4.63 (m, 1H,  $\beta_t$ ), 4.57-4.50 (m, 2H,  $\gamma_e$ ), 4.45 (dd, J = 12.0, 3.4 Hz, 1H,  $\gamma_t$ ), 4.19 (dd, J = 11.9, 6.0 Hz, 1H,  $\gamma_t$ ), 3.80 (s, 3H, OMe<sub>B,t</sub>), 3.80 (s, 6H, OMe<sub>A,e</sub>), 3.77 (s, 3H, OMe<sub>B,e</sub>), 3.76 (s, 3H, OMe<sub>B,t</sub>); <sup>13</sup>C NMR (acetone-*d*<sub>6</sub>)  $\delta$  166.43 (9<sub>e</sub>), 166.30 (9<sub>t</sub>), 162.46 (4<sub>C,e/t</sub>), 152.02 (3<sub>B,e/t</sub>), 148.86 (4<sub>B,e/t</sub>), 148.38 (3<sub>A,e/t</sub>/5<sub>A,e/t</sub>), 136.00 (4<sub>A,e/t</sub>), 132.63 (2<sub>C,t</sub>/6<sub>C,t</sub>), 132.53 (2<sub>C,e</sub>/6<sub>C,e</sub>), 123.50 (1<sub>B,e/t</sub>), 122.36 (1<sub>A,e</sub>), 122.25 (1<sub>A,t</sub>), 121.77 (6<sub>B,t</sub>), 121.69 (6<sub>B,e</sub>), 119.66 (5<sub>B,e</sub>), 119.34 (5<sub>B,t</sub>), 115.90 (3<sub>C,t</sub>/5<sub>C,t</sub>), 115.80 (3<sub>C,e</sub>/5<sub>C,e</sub>), 113.57 (2<sub>B,e</sub>), 113.53 (2<sub>B,t</sub>), 105.30 (2<sub>A,t</sub>/6<sub>A,t</sub>), 105.12 (2<sub>A,e</sub>/6<sub>A,e</sub>), 84.41 ( $\beta_t$ ), 83.50 ( $\beta_e$ ), 74.18 ( $\alpha_t$ ), 73.47 ( $\alpha_e$ ), 64.54 ( $\gamma_t$ ), 64.34 ( $\gamma_e$ ), 56.56 (OMe<sub>A,e</sub>), 56.49 (OMe<sub>A,t</sub>), 56.17 (OMe<sub>B,t</sub>), 56.13 (OMe<sub>B,e</sub>); HRMS(ESI)  $m/z$  calcd for  $[M+NH_4]^+$  = 488.1916, meas. 488.1928.

**7<sub>SG-pCA</sub>** (138 mg, 77%), white foam: (70:30 *erythro:threo*) <sup>1</sup>H NMR (acetone-*d*<sub>6</sub>)  $\delta$  7.53 (d, J = 8.7 Hz, 2H, 2<sub>C,t</sub>/6<sub>C,t</sub>), 7.50 (d, J = 8.6 Hz, 2H, 2<sub>C,e</sub>/6<sub>C,e</sub>), 7.50-7.47 (m, 1H, 7<sub>t</sub>), 7.44 (d, J = 16.0 Hz, 1H, 7<sub>e</sub>), 7.17 (dd, J = 8.0, 1.4 Hz, 1H, 5<sub>B,t</sub>), 7.14 (s, 1H, ArOH<sub>t</sub>), 7.10 (s, 1H, ArOH<sub>e</sub>), 7.06 (dd, J = 7.9, 1.3 Hz, 1H, 5<sub>B,e</sub>), 7.03-6.92 (m, 4H, 1<sub>B,e/t</sub>/2<sub>B,e/t</sub>), 6.91-6.84 (m, 6H, 3<sub>C,e/t</sub>/5<sub>C,e/t</sub>/6<sub>B,e/t</sub>), 6.83 (s, 2H, 2<sub>A,t</sub>/6<sub>A,t</sub>), 6.82 (s, 2H, 2<sub>A,e</sub>/6<sub>A,t</sub>), 6.33 (d, J = 16.0 Hz, 1H, 8<sub>t</sub>), 6.26 (d, J = 16.0 Hz, 1H, 8<sub>e</sub>), 5.00-4.94 (m, 2H,  $\alpha_{e/t}$ ), 4.70-4.66 (m, 1H,  $\beta_e$ ), 4.62-4.55 (m, 3H,  $\alpha$ OH<sub>e/t</sub>/ $\beta_t$ ), 4.46 (dd, J = 11.8, 6.7 Hz, 1H,  $\gamma_e$ ), 4.41 (dd, J = 11.8 Hz, 3.5



Hz, 1H,  $\gamma_e$ ), 4.36 (dd, J = 12.0, 3.4 Hz, 1H,  $\gamma_t$ ), 4.10 (dd, J = 12.0, 6.2 Hz, 1H,  $\gamma_t$ ), 3.85 (s, 3H, OMe<sub>B,t</sub>), 3.82 (s, 3H, OMe<sub>B,e</sub>), 3.81 (s, 6H, OMe<sub>A,e</sub>), 3.80 (s, 6H, OMe<sub>A,t</sub>); <sup>13</sup>C NMR (acetone-*d*<sub>6</sub>)  $\delta$  167.29 (9<sub>e</sub>), 167.18 (9<sub>t</sub>), 160.49 (4<sub>C,e/t</sub>), 151.96 (3<sub>B,e</sub>), 151.74 (3<sub>B,t</sub>), 149.32 (4<sub>B,e</sub>), 148.88 (4<sub>B,t</sub>), 148.39 (3<sub>A,t</sub>/5<sub>A,t</sub>), 148.35 (3<sub>A,e</sub>/5<sub>A,e</sub>), 145.61 (7<sub>t</sub>), 145.43 (7<sub>e</sub>), 135.96 (4<sub>A,e/t</sub>), 132.57 (1<sub>A,e/t</sub>), 131.00 (2<sub>C,t</sub>/6<sub>C,t</sub>), 130.95 (2<sub>C,e</sub>/6<sub>C,e</sub>), 126.92 (1<sub>C,e/t</sub>), 123.48 (1<sub>B,t</sub>), 123.44 (1<sub>B,e</sub>), 121.80 (6<sub>B,t</sub>), 121.71 (6<sub>B,e</sub>), 119.47 (5<sub>B,e</sub>), 119.18 (5<sub>B,t</sub>), 116.58 (3<sub>C,e/t</sub>/5<sub>C,e/t</sub>), 115.36 (8<sub>e</sub>), 115.25 (8<sub>t</sub>), 113.54 (2<sub>B,e</sub>), 113.50 (2<sub>B,t</sub>), 105.27 (2<sub>A,t</sub>/6<sub>A,t</sub>), 105.09 (2<sub>A,e</sub>/6<sub>A,e</sub>), 84.33 ( $\beta_t$ ), 83.37 ( $\beta_e$ ), 73.92 ( $\alpha_t$ ), 73.36 ( $\alpha_e$ ), 64.23 ( $\gamma_t$ ), 64.05 ( $\gamma_e$ ), 56.56 (OMe<sub>A,e</sub>), 56.53 (OMe<sub>A,t</sub>), 56.22 (OMe<sub>B,t</sub>), 56.19 (OMe<sub>B,e</sub>); HRMS(ESI) *m/z* calcd for [M+NH<sub>4</sub>]<sup>+</sup> = 514.2072, meas. 514.2072.

7<sub>SG-FA</sub> (129 mg, 63%), white foam: (75:25 *erythro:threo*) <sup>1</sup>H NMR (acetone-*d*<sub>6</sub>)  $\delta$  8.18 (s, 1H, ArOH<sub>t</sub>), 8.16 (s, 1H, ArOH<sub>e</sub>), 7.47 (d, J = 16.0 Hz, 1H, 7<sub>t</sub>), 7.41 (d, J = 15.9 Hz, 1H, 7<sub>e</sub>), 7.30 (d, J = 1.8 Hz, 1H, 2<sub>C,t</sub>), 7.27 (d, J = 1.8 Hz, 1H, 2<sub>C,e</sub>), 7.17 (dd, J = 8.0, 1.4 Hz, 1H, 5<sub>B,t</sub>), 7.12 (dd, J = 8.6, 2.2 Hz, 1H, 6<sub>C,t</sub>), 7.09 (dd, J = 8.2, 1.9 Hz, 1H, 6<sub>C,e</sub>), 7.05 (dd, J = 8.0, 1.4 Hz, 1H, 5<sub>B,e</sub>), 7.03-6.92 (m, 4H, 1<sub>B,e/t</sub>/2<sub>B,e/t</sub>), 6.91-6.80 (m, 12H, 2<sub>A,e/t</sub>/6<sub>A,e/t</sub>/3<sub>C,e/t</sub>/5<sub>C,e/t</sub>/5<sub>C,e/t</sub>/6<sub>B,e/t</sub>), 6.36 (d, J = 16.0 Hz, 1H, 8<sub>t</sub>), 6.30 (d, J = 16.0 Hz, 1H, 8<sub>e</sub>), 5.00-4.95 (m, 2H,  $\alpha_{e/t}$ ), 4.71-4.67 (m, 1H,  $\beta_e$ ), 4.62-4.56 (m, 3H,  $\alpha$ OH<sub>e/t</sub>/ $\beta_t$ ), 4.46 (dd, J = 11.9, 6.5 Hz, 1H,  $\gamma_e$ ), 4.42 (dd, J = 11.8, 3.7 Hz, 1H,  $\gamma_e$ ), 4.36 (dd, J = 12.0, 3.4 Hz, 1H,  $\gamma_t$ ), 4.11 (dd, J = 12.0, 6.1 Hz, 1H,  $\gamma_t$ ), 3.92 (s, 6H, OMe<sub>C,e/t</sub>), 3.85 (s, 3H, OMe<sub>B,t</sub>), 3.82 (s, 3H, OMe<sub>B,e</sub>), 3.81 (s, 6H, OMe<sub>A,e</sub>), 3.80 (s, 6H, OMe<sub>A,t</sub>); <sup>13</sup>C NMR (acetone-*d*<sub>6</sub>)  $\delta$  167.29 (9<sub>e</sub>), 166.89 (9<sub>t</sub>), 151.97 (3<sub>B,e</sub>), 151.74 (3<sub>B,t</sub>), 149.95 (4<sub>C,e/t</sub>), 148.84 (4<sub>B,e/t</sub>), 148.66 (3<sub>C,e/t</sub>), 148.39 (3<sub>A,t</sub>/5<sub>A,t</sub>), 148.36 (3<sub>A,e</sub>/5<sub>A,e</sub>), 145.95 (7<sub>t</sub>), 145.79 (7<sub>e</sub>), 135.96 (4<sub>A,e/t</sub>), 132.58 (1<sub>A,e/t</sub>), 127.36 (1<sub>C,e</sub>), 126.61 (1<sub>C,t</sub>), 123.94 (6<sub>C,t</sub>), 123.90 (6<sub>C,e</sub>), 123.47 (1<sub>B,t</sub>), 123.44 (1<sub>B,e</sub>), 121.80 (6<sub>B,t</sub>), 121.71 (6<sub>B,e</sub>), 119.43 (5<sub>B,e</sub>), 119.12 (5<sub>B,t</sub>), 115.95 (5<sub>C,e/t</sub>), 115.58 (8<sub>e</sub>), 115.48 (8<sub>t</sub>), 115.24 (3<sub>C,t</sub>/5<sub>C,t</sub>), 113.55 (2<sub>B,e</sub>), 113.50 (2<sub>B,t</sub>), 111.32 (2<sub>C,t</sub>), 111.25 (2<sub>C,e</sub>), 105.07 (2<sub>A,e</sub>/6<sub>A,e</sub>), 105.05 (2<sub>A,t</sub>/6<sub>A,t</sub>), 84.26 ( $\beta_t$ ), 83.31 ( $\beta_e$ ), 73.95 ( $\alpha_t$ ), 73.21 ( $\alpha_e$ ), 63.95 ( $\gamma_e$ ), 63.86 ( $\gamma_t$ ), 56.56 (OMe<sub>A,e/t</sub>), 56.30 (OMe<sub>C,e/t</sub>), 56.22 (OMe<sub>B,t</sub>), 56.18 (OMe<sub>B,e</sub>); HRMS(ESI) *m/z* calcd for [M+NH<sub>4</sub>]<sup>+</sup> = 544.2178, meas. 544.2184.

7<sub>SG-SA</sub> (85 mg, 47%): (80:20 *erythro:threo*) <sup>1</sup>H NMR (acetone-*d*<sub>6</sub>)  $\delta$  7.96 (s, 1H, ArOH<sub>t</sub>), 7.79 (s, 1H, ArOH<sub>e</sub>), 7.43 (d, J = 15.9 Hz, 1H, 7<sub>t</sub>), 7.37 (d, J = 15.9 Hz, 1H, 7<sub>e</sub>), 7.17 (d, J = 8.0 Hz, 1H, 5<sub>B,t</sub>), 7.15 (s, 1H, ArOH<sub>t</sub>), 7.11 (s, 1H, ArOH<sub>e</sub>), 7.06 (d, J = 8.0 Hz, 1H, 5<sub>B,e</sub>), 7.04-6.92 (m, 8H, 1<sub>B,e/t</sub>/2<sub>B,e/t</sub>/2<sub>C,e/t</sub>/6<sub>C,e/t</sub>), 6.92-6.80 (m, 6H, 2<sub>A,e/t</sub>/6<sub>A,e/t</sub>/6<sub>B,e/t</sub>), 6.38 (d, J = 15.9 Hz, 1H, 8<sub>t</sub>), 6.32 (d, J = 15.9 Hz, 1H, 8<sub>e</sub>), 5.01-4.94 (m, 2H,  $\alpha_{e/t}$ ), 4.71-4.67 (m, 1H,  $\beta_e$ ), 4.63 (s, 1H,  $\alpha$ OH), 4.62 (s, 1H,  $\alpha$ OH), 4.61-4.56 (m, 1H,  $\beta_t$ ), 4.49-4.41 (m, 2H,  $\gamma_{e/t}$ ), 4.35 (dd, J = 11.9, 3.4 Hz, 1H,  $\gamma_t$ ), 4.11 (dd, J = 12.0, 6.0 Hz, 1H,  $\gamma_t$ ), 3.89 (s, 12H, OMe<sub>C,e/t</sub>), 3.85 (s, 3H, OMe<sub>B,t</sub>), 3.82 (s, 3H, OMe<sub>B,e</sub>), 3.81 (s, 6H, OMe<sub>A,e</sub>), 3.80 (s,

6H, OMe<sub>A,t</sub>); <sup>13</sup>C NMR (acetone-*d*<sub>6</sub>) δ 167.26 (9<sub>e</sub>), 167.15 (9<sub>t</sub>), 151.95 (3<sub>B,e</sub>), 151.72 (3<sub>B,t</sub>), 149.27 (4<sub>B,t</sub>), 148.88 (4<sub>B,e</sub>), 148.82 (3<sub>C</sub>/5<sub>C</sub>), 148.81 (3<sub>C</sub>/5<sub>C</sub>), 148.41 (3<sub>A,t</sub>/5<sub>A,t</sub>), 148.35 (3<sub>A,e</sub>/5<sub>A,e</sub>), 146.29 (7<sub>t</sub>), 146.13 (7<sub>e</sub>), 139.39 (4<sub>C,t</sub>), 139.27 (4<sub>C,e</sub>), 136.04 (4<sub>A,t</sub>), 135.94 (4<sub>A,e</sub>), 132.58 (1<sub>A,e</sub>), 132.01 (1<sub>A,t</sub>), 126.05 (1<sub>C,e/t</sub>), 123.45 (1<sub>B,t</sub>), 123.43 (1<sub>B,e</sub>), 121.79 (6<sub>B,t</sub>), 121.71 (6<sub>B,e</sub>), 119.39 (5<sub>B,e</sub>), 119.06 (5<sub>B,t</sub>), 115.80 (8<sub>e</sub>), 115.70 (8<sub>t</sub>), 113.54 (2<sub>B,e</sub>), 113.49 (2<sub>B,t</sub>), 106.76 (2<sub>C,t</sub>/6<sub>C,t</sub>), 106.70 (2<sub>C,e</sub>/6<sub>C,e</sub>), 105.27 (2<sub>A,t</sub>/6<sub>A,t</sub>), 105.05 (2<sub>A,e</sub>/6<sub>A,e</sub>), 84.18 (β<sub>t</sub>), 83.26 (β<sub>e</sub>), 73.98 (α<sub>t</sub>), 73.30 (α<sub>e</sub>), 64.17 (γ<sub>t</sub>), 63.90 (γ<sub>e</sub>), 56.64 (OMe<sub>C,e/t</sub>), 56.56 (OMe<sub>A,e</sub>), 56.54 (OMe<sub>A,t</sub>), 56.22 (OMe<sub>B,t</sub>), 56.18 (OMe<sub>B,e</sub>); HRMS(ESI) *m/z* calcd for [M+NH<sub>4</sub>]<sup>+</sup> = 574.2283, meas. 574.2301.

7<sub>SG-Ac</sub> (75 mg, 84%), white foam: (75:25 *erythro:threo*) <sup>1</sup>H NMR (acetone-*d*<sub>6</sub>) δ 7.29 (s, 1H, ArOH<sub>t</sub>), 7.23 (s, 1H, ArOH<sub>e</sub>), 7.14 (s, 1H, ArOH<sub>t</sub>), 7.13-7.09 (m, 2H, 5<sub>B,t</sub>/ArOH<sub>e</sub>), 7.03-6.92 (m, 5H, 1<sub>B,e/t</sub>/2<sub>B,e/t</sub>/5<sub>B,e</sub>), 6.89-6.81 (m, 2H, 6<sub>B,e/t</sub>), 6.80 (s, 2H, 2<sub>A,t</sub>/6<sub>A,t</sub>), 6.77 (s, 2H, 2<sub>A,e</sub>/6<sub>A,e</sub>), 4.94-4.91 (m, 1H, α<sub>e</sub>), 4.91-4.88 (s, 1H, α<sub>t</sub>), 4.62-4.55 (m, 3H, β<sub>e</sub>/αOH<sub>e/t</sub>), 4.52-4.48 (m, 1H, β<sub>t</sub>), 4.37 (dd, J = 11.9, 6.9 Hz, 1H, γ<sub>e</sub>), 4.26 (dd, J = 11.9, 3.2 Hz, 1H, γ<sub>e</sub>), 4.23 (dd, J = 11.9, 3.4 Hz, 1H, γ<sub>t</sub>), 3.99 (dd, J = 11.9, 6.4 Hz, 1H, γ<sub>t</sub>), 3.86 (s, 3H, OMe<sub>B,t</sub>), 3.83 (s, 3H, OMe<sub>B,e</sub>), 3.80 (s, 6H, OMe<sub>A,t</sub>), 3.79 (s, 6H, OMe<sub>A,e</sub>), 1.95 (s, 3H, γOAc<sub>t</sub>), 1.90 (s, 3H, γOAc<sub>e</sub>); <sup>13</sup>C NMR (acetone-*d*<sub>6</sub>) δ 170.92 (γOAc<sub>e</sub>), 170.80 (γOAc<sub>t</sub>), 151.95 (3<sub>B,e</sub>), 151.69 (3<sub>B,t</sub>), 149.26 (4<sub>B,t</sub>), 148.76 (4<sub>B,e</sub>), 148.40 (3<sub>A,t</sub>/5<sub>A,t</sub>), 148.34 (3<sub>A,e</sub>/5<sub>A,e</sub>), 136.05 (4<sub>A,t</sub>), 135.94 (4<sub>A,e</sub>), 132.49 (1<sub>A,e</sub>), 131.96 (1<sub>A,t</sub>), 123.47 (1<sub>B,e/t</sub>), 121.80 (6<sub>B,t</sub>), 121.70 (6<sub>B,e</sub>), 119.44 (5<sub>B,e</sub>), 119.08 (5<sub>B,t</sub>), 113.56 (2<sub>B,e</sub>), 113.50 (2<sub>B,t</sub>), 105.22 (2<sub>A,t</sub>/6<sub>A,t</sub>), 105.01 (2<sub>A,e</sub>/6<sub>A,e</sub>), 84.12 (β<sub>t</sub>), 83.20 (β<sub>e</sub>), 73.70 (α<sub>t</sub>), 73.20 (α<sub>e</sub>), 64.18 (γ<sub>t</sub>), 63.94 (γ<sub>e</sub>), 56.61 (OMe<sub>A,t</sub>), 56.54 (OMe<sub>A,e</sub>), 56.22 (OMe<sub>B,t</sub>), 56.18 (OMe<sub>B,e</sub>), 20.70 (γOAc<sub>e</sub>), 20.68 (γOAc<sub>t</sub>); HRMS(ESI) *m/z* calcd for [M+NH<sub>4</sub>]<sup>+</sup> = 410.1810, meas. 410.1817.

7<sub>SS-pBA</sub> (201 mg, 93%), white foam: (45:55 *erythro:threo*) <sup>1</sup>H NMR (acetone-*d*<sub>6</sub>) δ 7.81 (d, J = 8.7 Hz, 2H, 2<sub>C,t</sub>/6<sub>C,t</sub>), 7.71 (d, J = 8.8 Hz, 2H, 2<sub>C,e</sub>/6<sub>C,e</sub>), 7.04 (t, J = 8.4 Hz, 1H, 1<sub>B,e</sub>), 7.03 (t, J = 8.4 Hz, 1H, 1<sub>B,t</sub>), 6.91 (d, J = 8.7 Hz, 2H, 3<sub>C,t</sub>/5<sub>C,t</sub>), 6.85 (d, J = 8.6 Hz, 2H, 3<sub>C,e</sub>/5<sub>C,e</sub>), 6.76 (s, 2H, 2<sub>A,t</sub>/6<sub>A,t</sub>), 6.74 (s, 2H, 2<sub>A,e</sub>/6<sub>A,e</sub>), 6.71-6.67 (m, 4H, 2<sub>B,e/t</sub>/6<sub>B,e/t</sub>), 5.06-5.03 (m, 1H, α<sub>t</sub>), 5.01-4.98 (m, 1H, α<sub>e</sub>), 4.66 (d, J = 2.8 Hz, 1H, αOH), 4.65-4.61 (m, 1H, β<sub>e</sub>), 4.58-4.49 (m, 2H, γ<sub>e/t</sub>), 4.34-4.29 (m, 2H, β<sub>t</sub>/γ<sub>e</sub>), 4.12 (dd, J = 11.9, 4.2 Hz, 1H, γ<sub>e</sub>), 3.81 (s, 6H, OMe<sub>B,t</sub>), 3.79 (s, 12H, OMe<sub>B,e</sub>/OMe<sub>A,e</sub>), 3.71 (s, 6H, OMe<sub>A,t</sub>); <sup>13</sup>C NMR (acetone-*d*<sub>6</sub>) δ 166.40 (9<sub>e</sub>), 166.25 (9<sub>t</sub>), 162.49 (4<sub>C,t</sub>), 162.35 (4<sub>C,e</sub>), 154.51 (3<sub>B,e</sub>/5<sub>B,e</sub>), 154.05 (3<sub>B,t</sub>/5<sub>B,t</sub>), 148.47 (3<sub>A,e</sub>/5<sub>A,e</sub>), 148.34 (3<sub>A,t</sub>/5<sub>A,t</sub>), 137.80 (4<sub>B</sub>), 136.48 (4<sub>B</sub>), 136.18 (4<sub>A</sub>), 135.81 (4<sub>A</sub>), 132.52 (2<sub>C,t</sub>/6<sub>C,t</sub>), 132.49 (2<sub>C,e</sub>/6<sub>C,e</sub>), 124.73 (1<sub>B,e/t</sub>), 122.61 (1<sub>C,e</sub>), 122.46 (1<sub>C,t</sub>), 115.90 (3<sub>C,t</sub>/5<sub>C,t</sub>), 115.71 (3<sub>C,e</sub>/5<sub>C,e</sub>), 106.33 (2<sub>B,t</sub>/6<sub>B,t</sub>), 106.22 (2<sub>B,e</sub>/6<sub>B,e</sub>), 105.30 (2<sub>A,t</sub>/6<sub>A,t</sub>), 104.45 (2<sub>A,e</sub>/6<sub>A,e</sub>), 87.02 (β<sub>t</sub>), 84.53 (β<sub>e</sub>),

74.93 ( $\alpha_t$ ), 73.12 ( $\alpha_e$ ), 65.07 ( $\gamma_t$ ), 63.79 ( $\gamma_e$ ), 56.55 (OMe), 56.43 (OMe), 56.39 (OMe), 56.36 (OMe); HRMS(ESI) calcd for  $m/z$   $[M+NH_4]^+$  = 518.2021, meas. 518.2025.

7<sub>SS-pCA</sub> (155 mg, 90%), white foam: (50:50 *erythro:threo*)  $^1H$  NMR (acetone- $d_6$ )  $\delta$  7.55 (d, J = 8.6 Hz, 2H, 2 $_{C,t}$ /6 $_{C,t}$ ), 7.49 (d, J = 8.5 Hz, 2H, 2 $_{C,e}$ /6 $_{C,e}$ ), 7.48 (d, J = 16.3 Hz, 1H, 7 $_t$ ), 7.39 (d, J = 16.0 Hz, 1H, 7 $_e$ ), 7.13 (s, 1H, ArOH), 7.11 (s, 1H, ArOH), 7.04 (t, J = 8.4 Hz, 1H, 1 $_B$ ), 7.03 (t, J = 8.4 Hz, 1H, 1 $_B$ ), 6.92-6.86 (m, 4H, 3 $_{C,e/t}$ /5 $_{C,e/t}$ ), 6.75 (s, 2H, 2 $_A$ /6 $_A$ ), 6.73 (s, 2H, 2 $_A$ /6 $_A$ ), 6.72-6.68 (m, 4H, 2 $_{B,e/t}$ /6 $_{B,e/t}$ ), 6.35 (d, J = 16.0 Hz, 1H, 8 $_t$ ), 6.21 (d, J = 16.0 Hz, 8 $_e$ ), 5.01-4.98 (m, 1H,  $\alpha_t$ ), 4.97-4.94 (m, 1H,  $\alpha_e$ ), 4.63 (d, J = 3.0 Hz, 1H,  $\alpha$ OH), 4.61-4.57 (m, 1H,  $\beta_e$ ), 4.49-4.43 (m, 2H,  $\gamma_{e/t}$ ), 4.26-4.22 (m, 1H,  $\beta_t$ ), 4.22 (dd, J = 11.8, 3.4 Hz, 1H,  $\gamma_e$ ), 4.04 (dd, J = 11.9, 4.2 Hz, 1H,  $\gamma_t$ ), 3.85 (s, 12H, OMe $_{B,e/t}$ ), 3.81 (s, 6H, OMe $_A$ ), 3.77 (s, 6H, OMe $_A$ );  $^{13}C$  NMR (acetone- $d_6$ )  $\delta$  166.41 (9 $_e$ ), 166.27 (9 $_t$ ), 154.50 (3 $_B$ ), 154.04 (3 $_B$ ), 148.40 (3 $_A$ /5 $_A$ ), 148.34 (3 $_A$ /5 $_A$ ), 145.31 (7 $_t$ ), 145.03 (7 $_e$ ), 137.78 (4 $_B$ ), 136.48 (4 $_B$ ), 136.27 (4 $_A$ ), 136.17 (4 $_A$ ), 132.51 (1 $_A$ ), 132.48 (1 $_A$ ), 130.97 (2 $_{C,t}$ /6 $_{C,t}$ ), 130.86 (2 $_{C,e}$ /6 $_{C,e}$ ), 124.73 (1 $_{B,e/t}$ ), 115.90 (3 $_C$ /5 $_C$ ), 115.71 (3 $_C$ /5 $_C$ ), 115.68 (8 $_e$ ), 115.51 (8 $_t$ ), 106.32 (2 $_B$ /6 $_B$ ), 106.22 (2 $_B$ /6 $_B$ ), 105.30 (2 $_{A,t}$ /6 $_{A,t}$ ), 104.45 (2 $_{A,e}$ /6 $_{A,e}$ ), 86.99 ( $\beta_t$ ), 84.53 ( $\beta_e$ ), 74.93 ( $\alpha_t$ ), 73.13 ( $\alpha_e$ ), 65.07 ( $\gamma_t$ ), 63.80 ( $\gamma_e$ ), 56.55 (OMe), 56.42 (OMe), 56.39 (OMe), 56.36 (OMe); HRMS(ESI)  $m/z$  calcd for  $[M+NH_4]^+$  = 544.2178, meas. 544.2175.

7<sub>SS-FA</sub> (112 mg, 72%), white foam: (50:50 *erythro:threo*)  $^1H$  NMR (acetone- $d_6$ )  $\delta$  8.19 (s, 1H, ArOH), 8.17 (s, 1H, ArOH), 7.46 (d, J = 16.0 Hz, 1H, 7 $_t$ ), 7.35 (d, J = 16.0 Hz, 1H, 7 $_e$ ), 7.33 (m, 1H, 2 $_{C,t}$ ), 7.26 (d, J = 1.8 Hz, 1H, 2 $_{C,e}$ ), 7.16-7.11 (m, 3H, ArOH $_{e/t}$ , 6 $_{C,t}$ ), 7.09 (dd, J = 8.2, 1.8 Hz, 1H, 6 $_{C,e}$ ), 7.05 (t, J = 8.4 Hz, 1H, 1 $_B$ ), 7.03 (t, J = 8.4 Hz, 1H, 1 $_B$ ), 6.87 (d, J = 8.2 Hz, 1H, 5 $_{C,t}$ ), 6.85 (d, J = 8.2 Hz, 1H, 5 $_{C,e}$ ), 6.75 (s, 2H, 2 $_{A,t}$ /6 $_{A,t}$ ), 6.73 (s, 2H, 2 $_{A,e}$ /6 $_{A,e}$ ), 6.73-6.70 (m, 4H, 2 $_{B,e/t}$ /6 $_{B,e/t}$ ), 6.39 (d, J = 15.9 Hz, 1H, 8 $_t$ ), 6.24 (d, J = 15.9 Hz, 1H, 8 $_e$ ), 5.01-4.94 (m, 2H,  $\alpha_{e/t}$ ), 4.65 (d, J = 2.8 Hz, 1H,  $\alpha$ OH), 4.61-4.57 (m, 1H,  $\beta_e$ ), 4.48-4.42 (m, 3H,  $\alpha$ OH/ $\gamma_{e/t}$ ), 4.24 (dd, J = 12.0, 3.7 Hz, 1H,  $\gamma_e$ ), 4.25-4.21 (m, 1H,  $\beta_t$ ), 4.06 (dd, J = 11.9, 4.0 Hz, 1H,  $\gamma_t$ ), 3.93 (s, 3H, OMe $_C$ ), 3.92 (s, 3H, OMe $_C$ ), 3.85 (s, 12H, OMe $_{B,e/t}$ ), (3.81 (s, 6H, OMe $_A$ ), 3.77 (s, 6H, OMe $_A$ );  $^{13}C$  NMR (acetone- $d_6$ )  $\delta$  167.15 (9 $_e$ ), 167.12 (9 $_t$ ), 154.53 (3 $_B$ /5 $_B$ ), 154.01 (3 $_B$ /5 $_B$ ), 149.94 (4 $_C$ ), 148.69 (4 $_C$ ), 148.49 (3 $_A$ /5 $_A$ ), 148.39 (3 $_A$ /5 $_A$ ), 145.63 (7 $_t$ ), 145.33 (7 $_e$ ), 137.86 (4 $_B$ ), 136.52 (4 $_B$ ), 136.25 (4 $_A$ ), 135.85 (4 $_A$ ), 131.93 (1 $_{A,t}$ ), 131.65 (1 $_{A,e}$ ), 127.43 (1 $_{C,e/t}$ ), 124.78 (1 $_B$ ), 124.76 (1 $_B$ ), 123.89 (6 $_{C,t}$ ), 123.72 (6 $_{C,e}$ ), 116.04 (5 $_{C,e/t}$ ), 115.93 (8 $_e$ ), 115.75 (8 $_t$ ), 111.31 (2 $_{C,t}$ ), 111.24 (2 $_{C,e}$ ), 106.31 (2 $_B$ /6 $_B$ ), 106.27 (2 $_B$ /6 $_B$ ), 105.30 (2 $_{A,t}$ /6 $_{A,t}$ ), 104.43 (2 $_{A,e}$ /6 $_{A,e}$ ), 87.07 ( $\beta_t$ ), 84.41 ( $\beta_e$ ), 74.91 ( $\alpha_t$ ), 73.13 ( $\alpha_e$ ), 64.74 ( $\gamma_t$ ), 63.48 ( $\gamma_e$ ), 56.56 (OMe $_A$ ), 56.51 (OMe $_A$ ), 56.47 (OMe $_B$ ), 56.43 (OMe $_B$ ), 56.32 (OMe $_C$ ), 56.29 (OMe $_C$ ); HRMS(ESI)  $m/z$  calcd for  $[M+NH_4]^+$  = 574.2283, meas. 574.2264.

7<sub>SS-SA</sub> (193 mg, 89%), white foam: (40:60 *erythro:threo*) <sup>1</sup>H NMR (acetone-*d*<sub>6</sub>) δ 7.79 (s, 1H, ArOH), 7.76 (s, 1H, ArOH), 7.42 (d, J = 15.9 Hz, 1H, 7<sub>t</sub>), 7.30 (d, J = 15.9 Hz, 1H, 7<sub>e</sub>), 7.13 (s, 1H, ArOH<sub>t</sub>), 7.11 (s, 1H, ArOH<sub>e</sub>), 7.06 (t, J = 8.4 Hz, 1H, 1<sub>B,e</sub>), 7.05 (t, J = 8.4 Hz, 1H, 1<sub>B,t</sub>), 7.02 (s, 2H, 2<sub>C,t</sub>/6<sub>C,t</sub>), 6.94 (s, 2H, 2<sub>C,e</sub>/6<sub>C,e</sub>), 6.76-6.71 (m, 8H, 2<sub>A,e/t</sub>/6<sub>A,e/t</sub>/2<sub>B,e/t</sub>/6<sub>B,e/t</sub>), 6.40 (d, J = 15.9 Hz, 1H, 8<sub>t</sub>), 6.25 (d, J = 15.9 Hz, 1H, 8<sub>e</sub>), 5.00-4.95 (m, 2H, α<sub>e/t</sub>), 4.65 (d, J = 2.8 Hz, 1H, αOH), 4.60-4.56 (m, 1H, β<sub>e</sub>), 4.47-4.41 (m, 2H, γ<sub>e/t</sub>), 4.26 (dd, J = 11.7, 3.9 Hz, 1H, γ<sub>e</sub>), 4.23-4.19 (m, 1H, β<sub>t</sub>), 4.07 (dd, J = 11.9, 4.0 Hz, 1H, γ<sub>t</sub>), 3.90 (s, 6H, OMe<sub>C,t</sub>), 3.89 (s, 6H, OMe<sub>C,e</sub>), 3.86 (s, 12H, OMe<sub>B,e/t</sub>), 3.81 (s, 6H, OMe<sub>A,e</sub>), 3.77 (s, 6H, OMe<sub>A,t</sub>); <sup>13</sup>C NMR (acetone-*d*<sub>6</sub>) δ 167.09 (9<sub>e</sub>), 167.07 (9<sub>t</sub>), 154.54 (3<sub>B</sub>/5<sub>B</sub>), 154.02 (3<sub>B</sub>/5<sub>B</sub>), 148.91 (3<sub>C</sub>/5<sub>C</sub>), 148.89 (3<sub>C</sub>/5<sub>C</sub>), 148.39 (3<sub>A,e</sub>/5<sub>A,e</sub>), 148.33 (3<sub>A,t</sub>/5<sub>A,t</sub>), 145.95 (7<sub>t</sub>), 145.65 (7<sub>e</sub>), 139.38 (4<sub>C,t</sub>), 139.16 (4<sub>C,e</sub>), 137.91 (4<sub>B</sub>), 136.53 (4<sub>B</sub>), 136.27 (4<sub>A,t</sub>), 136.17 (4<sub>A,e</sub>), 131.89 (1<sub>A,e/t</sub>), 126.14 (1<sub>C,e/t</sub>), 124.76 (1<sub>B,e/t</sub>), 116.17 (8<sub>e</sub>), 116.00 (8<sub>t</sub>), 106.74 (2<sub>C,t</sub>/6<sub>C,t</sub>), 106.61 (2<sub>C,e</sub>/6<sub>C,e</sub>), 106.32 (2<sub>B,t</sub>/6<sub>B,t</sub>), 106.28 (2<sub>B,e</sub>/6<sub>B,e</sub>), 105.33 (2<sub>A,t</sub>/6<sub>A,t</sub>), 104.42 (2<sub>A,e</sub>/6<sub>A,e</sub>), 87.15 (β<sub>t</sub>), 84.41 (β<sub>e</sub>), 75.01 (α<sub>t</sub>), 74.90 (α<sub>e</sub>), 73.11 (γ<sub>t</sub>), 73.00 (γ<sub>e</sub>), 56.66 (OMe<sub>C,t</sub>), 56.63 (OMe<sub>C,e</sub>), 56.56 (OMe<sub>A,e</sub>), 56.52 (OMe<sub>A,t</sub>), 56.47 (OMe<sub>B,e</sub>), 56.44 (OMe<sub>B,t</sub>); HRMS(ESI) *m/z* calcd for [M+NH<sub>4</sub>]<sup>+</sup> = 604.2389, meas. 604.2381.

7<sub>SS-Ac</sub> (143 mg, 79%), white foam: (50:50 *erythro:threo*) <sup>1</sup>H NMR (acetone-*d*<sub>6</sub>) δ 7.12 (s, 1H, ArOH), 7.11 (s, 1H, ArOH), 7.05 (t, J = 8.4 Hz, 1H, 1<sub>B</sub>), 7.03 (t, J = 8.4 Hz, 1H, 1<sub>B</sub>), 6.74-6.69 (m, 6H, 2<sub>A,t</sub>/6<sub>A,t</sub>/2<sub>B,e/t</sub>/6<sub>B,e/t</sub>), 6.68 (s, 2H, 2<sub>A,e</sub>/6<sub>A,e</sub>), 4.92-4.87 (m, 2H, α<sub>e/t</sub>), 4.59 (d, J = 3.1 Hz, 1H, αOH), 4.53-4.49 (m, 1H, β<sub>e</sub>), 4.40 (d, J = 3.8 Hz, 1H, αOH), 4.38-4.32 (m, 2H, γ<sub>e/t</sub>), 4.20-4.16 (m, 1H, β<sub>t</sub>), 4.07 (dd, J = 11.8, 3.5 Hz, 1H, γ<sub>e</sub>), 3.92 (dd, J = 11.9, 4.0 Hz, 1H, γ<sub>t</sub>), 3.87 (s, 6H, OMe<sub>B,e</sub>), 3.85 (s, 6H, OMe<sub>B,t</sub>), 3.80 (s, 6H, OMe<sub>A,e</sub>), 3.79 (s, 6H, OMe<sub>A,t</sub>), 1.96 (s, 3H, OAc<sub>t</sub>), 1.86 (s, 3H, OAc<sub>e</sub>); <sup>13</sup>C NMR (acetone-*d*<sub>6</sub>) δ 170.82 (OAc<sub>e</sub>), 170.74 (OAc<sub>t</sub>), 154.53 (3<sub>B</sub>/5<sub>B</sub>), 153.97 (3<sub>B</sub>/5<sub>B</sub>), 148.42 (3<sub>A</sub>/5<sub>A</sub>), 148.31 (3<sub>A</sub>/5<sub>A</sub>), 137.80 (4<sub>B,t</sub>), 136.37 (4<sub>A,e/t</sub>), 135.74 (4<sub>B,e</sub>), 131.91 (1<sub>A,t</sub>), 131.45 (1<sub>A,e</sub>), 124.82 (1<sub>B</sub>), 124.74 (1<sub>B</sub>), 106.36 (2<sub>B</sub>/6<sub>B</sub>), 106.33 (2<sub>B</sub>/6<sub>B</sub>), 105.23 (2<sub>A,t</sub>/6<sub>A,t</sub>), 104.35 (2<sub>A,e</sub>/6<sub>A,e</sub>), 86.62 (β<sub>t</sub>), 84.11 (β<sub>e</sub>), 74.51 (α<sub>t</sub>), 72.82 (α<sub>e</sub>), 64.69 (γ<sub>t</sub>), 63.43 (γ<sub>e</sub>), 56.54 (OMe<sub>A</sub>), 56.52 (OMe<sub>A</sub>), 56.49 (OMe<sub>B</sub>), 56.43 (OMe<sub>B</sub>), 20.71 (OAc<sub>e</sub>), 20.67 (OAc<sub>t</sub>); HRMS(ESI) *m/z* calcd for [M+NH<sub>4</sub>]<sup>+</sup> = 440.1916, meas. 440.1914.

**Procedure for the preparation of acetylated benzoic and cinnamic acids:** *p*-Hydroxybenzoic, *p*-coumaric, ferulic, and sinapic acids were acetylated by methods used previously.<sup>2,4,6</sup>

**Procedure for the preparation of deuterioacetylated benzoic and cinnamic acids:** *p*-Hydroxybenzoic, *p*-coumaric, ferulic, and sinapic acids were deuterioacetylated by methods used in previously.<sup>8</sup> Sinapic acid (8.1 g, 36 mmol) was dissolved in pyridine (20 mL), after which acetic anhydride-*d*<sub>6</sub> (9.7 g, 90 mmol) was added to the mixture. The solution was allowed to stir at r.t. for 6 h, at which

point it was cooled to 0 °C. Absolute ethanol (20 mL) was added to the reaction mixture to cleave the mixed anhydride. After stirring the solution for 30 minutes, ice chips were added, followed by slow addition of 25 mL of conc. HCl. Yellow-white solids began to precipitate out of solution, and were collected *via* vacuum filtration through a class “M” sintered glass funnel. The solids were dried under high vacuum to afford deuterioacetylated sinapic acid **9<sub>SA</sub>** in a yield of 9.30 g (96%): <sup>1</sup>H NMR (acetone-*d*<sub>6</sub>) δ 7.63 (d, J = 16.0 Hz, 1H, 7), 7.09 (s, 2H, 2/6), 6.57 (d, J = 16.0 Hz, 1H, 8), 3.88 (s, 6H, OMe); <sup>13</sup>C NMR (acetone-*d*<sub>6</sub>) δ 168.44 (Ac-*d*<sub>3</sub>), 167.67 (9), 153.53 (3/5), 145.33 (7), 133.70 (1), 131.29 (4), 119.48 (8), 105.77 (2/6), 56.60 (OMe); HRMS(ESI) *m/z* calcd for [M-H]<sup>-</sup> = 268.0906, meas. 268.0910.

**9<sub>pBA</sub>** (1.66 g, 71%), white solid: <sup>1</sup>H NMR (acetone-*d*<sub>6</sub>) δ 8.10-8.06 (m, 2H, 2/6), 7.29-7.25 (m, 2H, 3/5); <sup>13</sup>C NMR (acetone-*d*<sub>6</sub>) δ 169.35 (Ac-*d*<sub>3</sub>), 166.83 (7), 155.58 (4), 131.93 (2/6), 128.78 (1), 122.84 (3/5); HRMS(ESI) *m/z* calcd for [M-H]<sup>-</sup> = 182.0538, meas. 182.0539.

**9<sub>pCA</sub>** (1.77g, 94%), white solid: <sup>1</sup>H NMR (acetone-*d*<sub>6</sub>) δ 7.76-7.72 (m, 2H, 2/6), 7.68 (d, J = 16.0 Hz, 1H, 7), 7.22-7.18 (m, 2H, 3/5), 6.52 (d, J = 16.0 Hz, 1H, 8); <sup>13</sup>C NMR (acetone-*d*<sub>6</sub>) δ 169.51 (Ac-*d*<sub>3</sub>), 167.61 (9), 153.37 (4), 144.43 (7), 133.02 (1), 130.13 (2/6), 123.26 (3/5), 119.28 (8); HRMS(ESI) *m/z* calcd for [M-H]<sup>-</sup> = 208.0695, meas. 208.0697.

**9<sub>FA</sub>** (2.10 g, 99%), white solid: <sup>1</sup>H NMR (acetone-*d*<sub>6</sub>) δ 7.65 (d, J = 16.0 Hz, 1H, 7), 7.47 (d, J = 1.8 Hz, 1H, 2), 7.26 (dd, J = 8.2, 1.8 Hz, 1H, 6), 7.12 (d, J = 8.1 Hz, 1H, 5), 6.55 (d, J = 16.0 Hz, 1H, 8), 3.91 (s, 3H, OMe); <sup>13</sup>C NMR (acetone-*d*<sub>6</sub>) δ 168.87 (Ac-*d*<sub>3</sub>), 167.66 (9), 152.67 (3), 144.86 (7), 142.56 (4), 134.34 (1), 124.12 (5), 122.09 (6), 119.38 (8), 112.36 (2), 56.37 (OMe); HRMS(ESI) *m/z* calcd for [M-H]<sup>-</sup> = 238.0800, meas. 238.0804.

**Procedure for the sidechain saturation of cinnamic acids:** Acetylated sinapic acid (666 mg, 2.5 mmol) was dissolved in THF (50 mL). 5% w/w palladium on carbon (100 mg, 15% w/w) was charged to the flask, which was then put under positive pressure using a balloon filled with H<sub>2</sub> gas. The mixture was stirred vigorously for three hours and filtered through Whatman 5 filter paper. The solids were rinsed with EtOAc (5 × 15 mL), and the resulting filtrate was concentrated under reduced pressure to afford **10<sub>DHSA</sub>** (639 mg, 95%) as a colorless crystal: <sup>1</sup>H NMR (acetone-*d*<sub>6</sub>) δ 6.65 (s, 2H, 2/6), 3.78 (s, 6H, OMe), 2.87 (t, J = 7.8 Hz, 2H, 7), 2.64 (t, J = 7.8 Hz, 2H, 8), 2.20 (s, 3H, Ac); <sup>13</sup>C NMR (acetone-*d*<sub>6</sub>) δ 173.96 (9), 168.66 (Ac), 153.03 (3/5), 140.41 (1), 128.00 (4), 105.79 (2/6), 56.32 (OMe), 35.91 (8), 32.02 (7), 20.28 (Ac); HRMS(ESI) *m/z* calcd for [M-H]<sup>-</sup> = 267.0874, meas. 267.0877.

**10<sub>DHpCA</sub>** (2.97 g, 95%), colorless crystal: <sup>1</sup>H NMR (acetone-*d*<sub>6</sub>) δ 7.29 (d, J = 8.6 Hz, 2H, 2/6), 7.02 (d, J = 8.5 Hz, 2H, 3/5), 2.91 (t, J = 7.6 Hz, 2H, 7), 2.62 (t, J = 7.6 Hz, 2H, 8), 2.23 (s, 3H, Ac); <sup>13</sup>C NMR

(acetone- $d_6$ )  $\delta$  173.79 (9), 169.72 (Ac), 150.28 (4), 139.37 (1), 130.04 (2/6), 122.48 (3/5), 35.80 (8), 30.83 (7), 20.95 (Ac); HRMS(ESI)  $m/z$  calcd for  $[M-H]^- = 207.0663$ , meas. 207.0663.

**10<sub>DHFA</sub>** (1.94 g, 93%), colorless crystal:  $^1\text{H}$  NMR (acetone- $d_6$ )  $\delta$  7.03 (d,  $J = 1.8$  Hz, 1H, 2), 6.94 (d,  $J = 8.0$  Hz, 1H, 5), 6.83 (dd,  $J = 8.0, 1.9$  Hz, 1H, 6), 3.80 (s, 3H, OMe), 2.90 (t,  $J = 7.8$  Hz, 2H, 7), 2.63 (t,  $J = 7.8$  Hz, 2H, 8), 2.21 (s, 3H, Ac);  $^{13}\text{C}$  NMR (acetone- $d_6$ )  $\delta$  173.90 (9), 169.07 (Ac), 152.07 (3), 140.85 (1), 139.22 (4), 123.38 (5), 120.97 (6), 113.58 (2), 56.08 (OMe), 35.88 (8), 31.40 (7), 20.49 (Ac); HRMS(ESI)  $m/z$  calcd for  $[M-H]^- = 237.0769$ , meas. 237.0770.

**Procedure for the sidechain saturation and deuteration of cinnamic acids:** Deuteroacetylated *p*-coumaric acid **9<sub>pCA</sub>** (2.09 g, 10.0 mmol) was dissolved in THF (100 mL). 5% w/w palladium on carbon (300 mg, 15% w/w) was charged to the flask and put under positive pressure using a balloon filled with  $\text{D}_2$  gas. The mixture was allowed to stir at room temperature for 5 h, at which point it was filtered through Whatman 5 filter paper. The solids were rinsed with EtOAc ( $5 \times 20$  mL), and the filtrate was concentrated *in vacuo* to afford **10<sub>DDpCA</sub>** (1.76 g, 86%) as a colorless crystal:  $^1\text{H}$  NMR (acetone- $d_6$ )  $\delta$  7.30-7.27 (m, 2H, 2/6), 7.04-7.00 (m, 2H, 3/5), 2.93-2.87 (m, 1H, 7), 2.64-2.58 (m, 1H, 8);  $^{13}\text{C}$  NMR (acetone- $d_6$ )  $\delta$  173.85 (9), 169.74 (Ac- $d_3$ ), 150.26 (4), 139.35 (1), 130.04 (2/6), 122.47 (3/5); HRMS(ESI)  $m/z$  calcd for  $[M-H]^- = 212.0977$ , meas. 212.0980.

**10<sub>DDFA</sub>** (1.72 g, 71%), colorless crystal:  $^1\text{H}$  NMR (acetone- $d_6$ )  $\delta$  7.03 (d,  $J = 1.8$  Hz, 1H, 2), 6.93 (d,  $J = 8.0$  Hz, 1H, 5), 6.83 (dd,  $J = 8.0, 1.8$  Hz, 1H, 6), 3.80 (s, 3H, OMe), 2.92-2.86 (m, 1H, 7), 2.65-2.59 (m, 1H, 8);  $^{13}\text{C}$  NMR (acetone- $d_6$ )  $\delta$  173.88 (9), 169.10 (Ac- $d_3$ ), 152.07 (3), 140.80 (1), 139.21 (4), 123.38 (5), 120.97 (6), 113.58 (2), 56.08 (OMe); HRMS(ESI)  $m/z$  calcd for  $[M-H]^- = 242.1082$ , meas. 242.1086.

**10<sub>DDSA</sub>** (2.56 g, 94%), colorless crystal:  $^1\text{H}$  NMR (acetone- $d_6$ )  $\delta$  6.65 (s, 2H, 2/6), 3.78 (s, 6H, OMe), 2.91-2.84 (m, 1H, 7), 2.66-2.59 (m, 1H, 8);  $^{13}\text{C}$  NMR (acetone- $d_6$ )  $\delta$  173.93 (9), 168.68 (Ac- $d_3$ ), 153.03 (3/5), 140.36 (1), 127.99 (4), 105.79 (2/6), 56.32 (OMe); HRMS(ESI)  $m/z$  calcd for  $[M-H]^- = 272.1188$ , meas. 272.1190.

**Procedure for the preparation of acid chlorides:** Acid chlorides **11<sub>pBA-DHSA</sub>** through **11<sub>DDpCA-DDSA</sub>** were prepared as previously described and used directly in the acylation step.<sup>6</sup>

**Procedure for the preparation of monolignols:** Monolignols coniferyl (**12<sub>G</sub>**) and sinapyl (**12<sub>S</sub>**) alcohols were synthesized as reported previously.<sup>6</sup>

**Procedure for the preparation of  $\gamma,\gamma$ -dideuterated monolignols:** Ferulic acid (3.68 g, 15.4 mmol) was dissolved in EtOAc (100 mL) with the aid of Et<sub>3</sub>N (3.43 mL, 24.6 mmol). The resulting mixture was cooled to 0 °C, at which point ClCO<sub>2</sub>Et (1.77 mL, 18.5 mmol) was charged to the flask. A white precipitate immediately formed. This slurry was allowed to stir for one hour and then filtered through a class “C” sintered glass funnel. To the filtrates were added MeOD (10 mL), DMF (1 mL), and NaBD<sub>4</sub> (1.29 g, 30.8 mmol). Reaction monitoring by TLC showed complete consumption of the starting material after three hours. 60 mL of 1 M HCl were added to the mixture to quench residual borodeuteride. After separating the two phases, the aqueous phase was extracted with EtOAc (1 × 40 mL). The combined organics were washed with brine (1 × 40 mL) and dried over Na<sub>2</sub>SO<sub>4</sub>. The organics were removed *in vacuo*, and the crude oil was dissolved in DCM and purified by flash column chromatography on 100 g SiO<sub>2</sub>. The product was eluted using a gradient of EtOAc/*n*-hexanes, from 20% to 60% over 20 column volumes. **12<sub>G-d5</sub>** was obtained in a yield of 2.64 g (75%) as a colorless oil: <sup>1</sup>H NMR (acetone-*d*<sub>6</sub>)  $\delta$  7.17 (s, 1H, 2), 7.00-6.96 (m, 2H, 5/6), 6.60 (d, J = 16.0 Hz, 1H,  $\alpha$ ), 6.39 (d, J = 16.0 Hz, 1H,  $\beta$ ), 3.84 (s, 3H, OMe); <sup>13</sup>C NMR (acetone-*d*<sub>6</sub>)  $\delta$  169.04 (Ac-*d*<sub>3</sub>), 152.34 (3), 140.18 (4), 137.18 (1), 131.29 ( $\beta$ ), 129.43 ( $\alpha$ ), 123.66 (5), 119.46 (6), 110.84 (2), 56.13 (OMe); HRMS(ESI) *m/z* calcd for [M+Na]<sup>+</sup> = 250.1098, meas. 250.1096.

**12<sub>S-d5</sub>** (3.21 g, 81%), <sup>1</sup>H NMR (acetone-*d*<sub>6</sub>)  $\delta$  6.79 (s, 2H, 2/6), 6.58 (d, J = 15.9 Hz, 1H), 6.41 (d, J = 15.9 Hz, 1H), 3.82 (s, 6H, OMe); <sup>13</sup>C NMR (acetone-*d*<sub>6</sub>)  $\delta$  168.61 (Ac-*d*<sub>3</sub>), 153.27 (3/5), 136.58 (1), 131.37 ( $\beta$ ), 129.84 ( $\alpha$ ), 129.04 (4), 103.74 (2/6), 56.37 (OMe); HRMS(ESI) *m/z* calcd for [M+H]<sup>+</sup> = 258.1384, meas. 258.1380.

**Procedure for the synthesis of natural abundance monolignol conjugates:** Natural abundance conjugates were synthesized according to the method outlined above (Figure 3). Monolignol acetates have been characterized previously.<sup>6</sup>

**13<sub>G-pBA</sub>** (511 mg, 48%): <sup>1</sup>H NMR (acetone-*d*<sub>6</sub>)  $\delta$  8.11 (d, J = 8.8 Hz, 2H, 2/6<sub>pBA</sub>), 7.31-7.25 (m, 3H, 3/5<sub>pBA</sub>/2<sub>G</sub>), 7.07 (dd, J = 8.1, 1.8 Hz, 1H, 6<sub>G</sub>), 7.02 (d, J = 8.1 Hz, 1H, 5<sub>G</sub>), 6.82 (d, J = 15.9 Hz, 1H,  $\alpha$ ), 6.53 (dt, J = 15.9 Hz, 6.2 Hz,  $\beta$ ), 4.99 (dd, J = 6.2, 1.3 Hz, 2H,  $\gamma$ ), 3.85 (s, 3H, OMe<sub>G</sub>), 2.30 (s, 3H, Ac-<sub>pBA</sub>), 2.23 (s, 3H, Ac<sub>G</sub>); <sup>13</sup>C NMR (acetone-*d*<sub>6</sub>)  $\delta$  169.30 (Ac<sub>pBA</sub>), 168.94 (Ac<sub>G</sub>), 165.82 (7), 155.71 (4<sub>pBA</sub>), 152.46 (3<sub>G</sub>), 140.83 (4<sub>G</sub>), 136.25 (1<sub>G</sub>), 134.05 ( $\alpha$ ), 131.77 (2/6<sub>pBA</sub>), 128.55 (1<sub>pBA</sub>), 124.68 ( $\beta$ ), 123.80 (5<sub>G</sub>), 122.96 (3/5<sub>pBA</sub>), 120.06 (6<sub>G</sub>), 111.14 (2<sub>G</sub>), 66.02 ( $\gamma$ ), 56.21 (OMe), 20.99 (Ac<sub>pBA</sub>), 20.48 (Ac<sub>G</sub>); HRMS(ESI) *m/z* calcd for [M+Na]<sup>+</sup> = 407.1101, meas. 407.1097.

**13S-pBA** (808 mg, 65%):  $^1\text{H}$  NMR (acetone- $d_6$ )  $\delta$  8.10 (d,  $J = 8.8$  Hz, 2H,  $2/6_{pBA}$ ), 7.29 (d,  $J = 8.8$  Hz, 2H,  $3/5_{pBA}$ ), 6.89 (s, 2H,  $2/6_S$ ), 6.79 (d,  $J = 15.9$  Hz, 1H,  $\alpha$ ), 6.54 (dt,  $J = 15.9, 6.2$  Hz, 1H,  $\beta$ ), 4.99 (dd,  $J = 6.2, 1.3$  Hz, 2H,  $\gamma$ ), 3.83 (s, 6H, OMe<sub>S</sub>), 2.30 (s, 3H, Ac), 2.22 (s, 3H, Ac);  $^{13}\text{C}$  NMR (acetone- $d_6$ )  $\delta$  169.31 (Ac<sub>pBA</sub>), 168.52 (Ac<sub>S</sub>), 165.81 (1<sub>pBA</sub>), 155.72 (7), 153.36 ( $3/5_S$ ), 135.63 (1<sub>S</sub>), 134.45 ( $\alpha$ ), 131.77 ( $2/6_{pBA}$ ), 129.65 (4<sub>S</sub>), 128.54 (4<sub>pBA</sub>), 124.79 ( $\beta$ ), 122.97 ( $3/5_{pBA}$ ), 104.19 ( $2/6_S$ ), 65.98 ( $\gamma$ ), 56.44 (OMe), 20.99 (Ac<sub>pBA</sub>), 20.26 (Ac<sub>S</sub>); HRMS(ESI)  $m/z$  calcd for  $[\text{M}+\text{Na}]^+ = 437.1207$ , meas. 437.1200.

**13G-DHpCA** (513 mg, 57%):  $^1\text{H}$  NMR (acetone- $d_6$ )  $\delta$  7.28 (d,  $J = 8.6$  Hz, 2H,  $2/6_{pCA}$ ), 7.21 (broad s, 1H, 2<sub>G</sub>), 7.03-6.99 (m, 4H,  $3/5_{pCA}/5_G/6_G$ ), 6.66 (d,  $J = 15.9$  Hz, 1H,  $\alpha$ ), 6.34 (dt,  $J = 15.9, 6.2$  Hz, 1H,  $\beta$ ), 4.71 (dd,  $J = 6.3, 1.2$  Hz, 2H,  $\gamma$ ), 3.85 (s, 3H, OMe), 2.95 (t,  $J = 7.6$  Hz, 2H, 7), 2.69 (t,  $J = 7.6$  Hz, 2H, 8), 2.23 (s, 3H, Ac), 2.22 (s, 3H, Ac);  $^{13}\text{C}$  NMR (acetone- $d_6$ )  $\delta$  172.69 (9), 169.72 (Ac), 168.95 (Ac), 152.43 (3<sub>G</sub>), 150.33 (4<sub>pCA</sub>), 140.77 (4<sub>G</sub>), 139.10 (1<sub>pCA</sub>), 136.26 (1<sub>G</sub>), 133.73 ( $\alpha$ ), 130.09 ( $2/6_{pCA}$ ), 124.82 ( $\beta$ ), 123.78 (5<sub>G</sub>), 122.51 ( $3/5_{pCA}$ ), 119.99 (6<sub>G</sub>), 111.06 (2<sub>G</sub>), 65.22 ( $\gamma$ ), 56.20 (OMe), 36.24 (8), 30.86 (7), 20.95 (Ac), 20.48 (Ac); HRMS(ESI)  $m/z$  calcd for  $[\text{M}+\text{NH}_4]^+ = 430.1860$ , meas. 430.1854.

**13S-DHpCA** (448 mg, 49%):  $^1\text{H}$  NMR (acetone- $d_6$ )  $\delta$  7.28 (d,  $J = 8.6$  Hz, 2H,  $2/6_{pCA}$ ), 7.01 (d,  $J = 8.6$  Hz, 2H,  $3/5_{pCA}$ ), 6.83 (s, 3H,  $2/6_S$ ), 6.64 (d,  $J = 15.9$  Hz, 1H,  $\alpha$ ), 6.36 (dt,  $J = 15.9, 6.2$  Hz, 1H,  $\beta$ ), 4.71 (dd,  $J = 6.3, 1.3$  Hz, 2H,  $\gamma$ ), 3.83 (s, 6H, OMe), 2.94 (t,  $J = 7.6$  Hz, 2H, 7), 2.69 (t,  $J = 7.6$  Hz, 2H, 8), 2.23 (s, 3H, Ac<sub>pCA</sub>), 2.22 (s, 3H, Ac<sub>S</sub>);  $^{13}\text{C}$  NMR (acetone- $d_6$ )  $\delta$  172.69 (9), 169.72 (Ac<sub>pCA</sub>), 168.52 (Ac<sub>S</sub>), 153.34 ( $3/5_S$ ), 150.33 (4<sub>pCA</sub>), 139.09 (1<sub>pCA</sub>), 135.65 (1<sub>S</sub>), 134.18 ( $\alpha$ ), 130.09 ( $2/6_{pCA}$ ), 129.60 (4<sub>S</sub>), 124.90 ( $\beta$ ), 122.52 ( $3/5_{pCA}$ ), 104.10 ( $2/6_S$ ), 65.21 ( $\gamma$ ), 56.44 (OMe), 36.24 (8), 30.86 (7), 20.94 (Ac<sub>pCA</sub>), 20.26 (Ac<sub>S</sub>); HRMS(ESI)  $m/z$  calcd for  $[\text{M}+\text{Na}]^+ = 465.1520$ , meas. 465.1514.

**13G-DHFA** (691 mg, 52%):  $^1\text{H}$  NMR (acetone- $d_6$ )  $\delta$  7.21 (s, 1H, 2<sub>G</sub>), 7.04-7.00 (m, 3H,  $2_{FA}/5_G/6_G$ ), 6.93 (d,  $J = 8.0$  Hz, 1H, 5<sub>FA</sub>), 6.82 (dd,  $J = 8.0, 1.6$  Hz, 1H, 6<sub>FA</sub>), 6.67 (d,  $J = 15.9$  Hz, 1H,  $\alpha$ ), 6.35 (dt,  $J = 15.9, 6.3$  Hz, 1H,  $\beta$ ), 4.72 (dd,  $J = 6.2, 1.1$  Hz, 2H,  $\gamma$ ), 3.85 (s, 3H, OMe<sub>G</sub>), 3.78 (s, 3H, OMe<sub>FA</sub>), 2.94 (t,  $J = 7.7$  Hz, 2H, 7), 2.70 (t,  $J = 7.7$  Hz, 2H, 8), 2.23 (s, 3H, Ac<sub>G</sub>), 2.21 (s, 3H, Ac<sub>FA</sub>);  $^{13}\text{C}$  NMR (acetone- $d_6$ )  $\delta$  172.74 (9), 169.08 (Ac<sub>G</sub>), 168.95 (Ac<sub>FA</sub>), 152.44 (3<sub>FA</sub>), 152.10 (3<sub>G</sub>), 140.78 (4<sub>G</sub>), 140.58 (1<sub>FA</sub>), 139.27 (4<sub>FA</sub>), 136.25 (1<sub>G</sub>), 133.75 ( $\alpha$ ), 124.83 ( $\beta$ ), 123.78 (5<sub>G</sub>), 123.43 (5<sub>FA</sub>), 121.02 (6<sub>FA</sub>), 119.99 (6<sub>G</sub>), 113.57 (2<sub>FA</sub>), 111.06 (2<sub>G</sub>), 65.25 ( $\gamma$ ), 56.20 (OMe), 56.08 (OMe), 36.27 (8), 31.39 (7), 20.49 (Ac), 20.48 (Ac); HRMS(ESI)  $m/z$  calcd for  $[\text{M}+\text{NH}_4]^+ = 460.1966$ , meas. 460.1958.

**13S-DHFA** (1.08 g, 76%):  $^1\text{H}$  NMR (acetone- $d_6$ )  $\delta$  7.02 (d,  $J = 1.5$  Hz, 1H, 2<sub>FA</sub>), 6.93 (d,  $J = 8.1$  Hz, 1H, 5<sub>FA</sub>), 6.84-6.80 (m, 3H,  $2/6_S/6_{FA}$ ), 6.65 (d,  $J = 15.9$  Hz, 1H,  $\alpha$ ), 6.37 (dt,  $J = 15.9, 6.3$  Hz, 1H,  $\beta$ ), 4.72 (dd,  $J = 6.2, 1.1$  Hz, 2H,  $\gamma$ ), 3.83 (s, 6H, OMe<sub>S</sub>), 3.78 (s, 3H, OMe<sub>FA</sub>), 2.94 (t,  $J = 7.6$  Hz, 2H, 7), 2.70 (t,



$J = 7.6$  Hz, 2H, 8), 2.22 (s, 3H, Ac<sub>S</sub>), 2.21 (s, 3H, Ac<sub>FA</sub>); <sup>13</sup>C NMR (acetone-*d*<sub>6</sub>)  $\delta$  172.74 (9), 169.08 (Ac<sub>FA</sub>), 168.53 (Ac<sub>S</sub>), 153.34 (3/5<sub>S</sub>), 152.10 (3<sub>FA</sub>), 140.58 (1<sub>FA</sub>), 139.27 (4<sub>FA</sub>), 135.64 (1<sub>S</sub>), 134.18 ( $\alpha$ ), 129.60 (4<sub>S</sub>), 124.91 ( $\beta$ ), 123.43 (5<sub>FA</sub>), 121.02 (6<sub>FA</sub>), 113.57 (2<sub>FA</sub>), 104.10 (2/6<sub>S</sub>), 65.22 ( $\gamma$ ), 56.43 (OMe<sub>S</sub>), 56.09 (OMe<sub>FA</sub>), 36.27 (8), 31.39 (7), 20.49 (Ac<sub>FA</sub>), 20.26 (Ac<sub>S</sub>); HRMS(ESI)  $m/z$  calcd for [M+NH<sub>4</sub>]<sup>+</sup> = 490.2072, meas. 490.2063.

**13<sub>G</sub>-DHSA** (322 mg, 20%): <sup>1</sup>H NMR (acetone-*d*<sub>6</sub>)  $\delta$  7.21 (s, 1H, 2<sub>G</sub>), 7.04-6.99 (m, 2H, 5<sub>G</sub>/6<sub>G</sub>), 6.68 (d,  $J = 15.9$  Hz, 1H,  $\alpha$ ), 6.64 (s, 2H, 2/6<sub>SA</sub>), 6.36 (dt,  $J = 15.9, 6.3$  Hz, 1H,  $\beta$ ), 4.73 (dd,  $J = 6.3, 1.3$  Hz, 2H,  $\gamma$ ), 3.85 (s, 3H, OMe<sub>G</sub>), 3.76 (s, 6H, OMe<sub>SA</sub>), 2.93 (t,  $J = 7.7$  Hz, 2H, 7), 2.71 (t,  $J = 7.7$  Hz, 2H, 8), 2.23 (Ac<sub>G</sub>), 2.20 (Ac<sub>SA</sub>); <sup>13</sup>C NMR (acetone-*d*<sub>6</sub>)  $\delta$  172.77 (9), 168.96 (Ac<sub>G</sub>), 168.66 (Ac<sub>SA</sub>), 153.05 (3/5<sub>SA</sub>), 152.44 (3<sub>G</sub>), 140.78 (4<sub>G</sub>), 140.16 (1<sub>SA</sub>), 136.23 (1<sub>G</sub>), 133.76 ( $\alpha$ ), 128.04 (4<sub>SA</sub>), 124.83 ( $\beta$ ), 123.78 (5<sub>G</sub>), 119.99 (6<sub>G</sub>), 111.05 (2<sub>G</sub>), 105.78 (2/6<sub>SA</sub>), 65.27 ( $\gamma$ ), 56.32 (OMe<sub>SA</sub>), 56.20 (OMe<sub>G</sub>), 36.28 (8), 31.99 (7), 20.48 (Ac<sub>G</sub>), 20.28 (Ac<sub>SA</sub>); HRMS(ESI)  $m/z$  calcd for [M+NH<sub>4</sub>]<sup>+</sup> = 490.2072, meas. 490.2065.

**13<sub>S</sub>-DHSA** (1.17 g, 66%): <sup>1</sup>H NMR (acetone-*d*<sub>6</sub>)  $\delta$  6.83 (s, 2H, 2/6<sub>S</sub>), 6.65 (d,  $J = 16.0$  Hz, 1H,  $\alpha$ ), 6.64 (s, 2H, 2/6<sub>SA</sub>), 6.37 (dt,  $J = 15.9, 6.2$  Hz, 1H,  $\beta$ ), 4.73 (dd,  $J = 6.2, 1.2$  Hz, 2H,  $\gamma$ ), 3.83 (s, 6H, OMe<sub>S</sub>), 3.76 (s, 6H, OMe<sub>SA</sub>), 2.93 (t,  $J = 7.6$  Hz, 2H, 7), 2.71 (t,  $J = 7.6$  Hz, 2H, 8), 2.22 (s, 3H, Ac), 2.20 (s, 3H, Ac); <sup>13</sup>C NMR (acetone-*d*<sub>6</sub>)  $\delta$  172.77 (9), 168.66 (Ac<sub>S</sub>), 168.53 (Ac<sub>SA</sub>), 153.35 (3/5<sub>S</sub>), 153.05 (3/5<sub>SA</sub>), 140.15 (1<sub>SA</sub>), 135.63 (1<sub>S</sub>), 134.18 ( $\alpha$ ), 129.61 (4<sub>S</sub>), 128.04 (4<sub>SA</sub>), 124.92 ( $\beta$ ), 105.79 (2/6<sub>SA</sub>), 104.09 (2/6<sub>S</sub>), 65.24 ( $\gamma$ ), 56.43 (OMe<sub>S</sub>), 56.33 (OMe<sub>SA</sub>), 36.28 (8), 31.99 (7), 20.28 (Ac), 20.26 (Ac); HRMS(ESI)  $m/z$  calcd for [M+NH<sub>4</sub>]<sup>+</sup> = 520.2177, meas. 520.2173.

**Procedure for the synthesis of octa/deca-deuterated monolignol conjugates:** Deuterium-labeled monolignol conjugates were synthesized according to the method outlined above (Figure 3).

**13<sub>G-d8</sub>:** <sup>1</sup>H NMR (acetone-*d*<sub>6</sub>)  $\delta$  7.23 (d,  $J = 1.1$  Hz, 1H, 2), 7.05-6.99 (m, 2H, 5/6), 6.69 (d,  $J = 16.0$  Hz, 1H,  $\alpha$ ), 6.36 (d,  $J = 16.0$  Hz, 1H,  $\beta$ ), 3.85 (OMe); <sup>13</sup>C NMR (acetone-*d*<sub>6</sub>)  $\delta$  170.78 ( $\gamma$ Ac-*d*<sub>3</sub>), 168.98 (ArAc-*d*<sub>3</sub>), 152.44 (3), 140.75 (4), 136.27 (1), 133.77 ( $\alpha$ ), 124.77 ( $\beta$ ), 123.78 (5), 119.96 (6), 111.05 (2), 56.19 (OMe); HRMS(ESI)  $m/z$  calcd for [M+NH<sub>4</sub>]<sup>+</sup> = 290.1838, meas. 290.1836.

**13<sub>S-d8</sub>:** <sup>1</sup>H NMR (acetone-*d*<sub>6</sub>)  $\delta$  6.85 (s, 2H, 2/6), 6.67 (d,  $J = 15.9$  Hz, 1H,  $\alpha$ ), 6.38 (d,  $J = 15.9$  Hz, 1H,  $\beta$ ), 3.83 (s, 6H, OMe); <sup>13</sup>C NMR (acetone-*d*<sub>6</sub>)  $\delta$  170.78 ( $\gamma$ Ac-*d*<sub>3</sub>), 168.55 (ArAc-*d*<sub>3</sub>), 153.34 (3/5), 135.66 (1), 134.19 ( $\alpha$ ), 129.58 (4), 124.86 ( $\beta$ ), 104.09 (2/6), 56.43 (OMe); HRMS(ESI)  $m/z$  calcd for [M+NH<sub>4</sub>]<sup>+</sup> = 320.1944, meas. 320.1942.

**13<sub>G-pBA-d8</sub>**: <sup>1</sup>H NMR (acetone-*d*<sub>6</sub>) δ 8.10 (d, J = 8.8 Hz, 2H, 2/6<sub>pBA</sub>), 7.31-7.26 (m, 3H, 3/5<sub>pBA</sub>/2<sub>G</sub>), 7.07 (dd, J = 8.1, 1.6 Hz, 1H, 6<sub>G</sub>), 7.02 (d, J = 8.2 Hz, 1H, 6<sub>G</sub>), 6.82 (d, J = 16.0 Hz, 1H, α), 6.51 (d, J = 15.9 Hz, 1H, β), 3.85 (s, 3H, OMe); <sup>13</sup>C NMR (acetone-*d*<sub>6</sub>) δ 169.33 (Ac-*d*<sub>3</sub>), 168.97 (Ac-*d*<sub>3</sub>), 165.83 (9), 155.69 (4<sub>pBA</sub>), 152.45 (3<sub>G</sub>), 140.81 (4<sub>G</sub>), 136.23 (1<sub>G</sub>), 134.20 (α), 131.76 (2/6<sub>pBA</sub>), 128.55 (1<sub>pBA</sub>), 124.54 (β), 123.79 (5<sub>G</sub>), 122.95 (3/5<sub>pBA</sub>), 120.06 (6<sub>G</sub>), 111.13 (2<sub>G</sub>), 56.20 (OMe<sub>G</sub>); HRMS(ESI) *m/z* calcd for [M+NH<sub>4</sub>]<sup>+</sup> = 410.2049, meas. 410.2048.

**13<sub>S-pBA-d8</sub>**: <sup>1</sup>H NMR (acetone-*d*<sub>6</sub>) δ 8.10 (d, J = 8.6 Hz, 2H, 2/6<sub>pBA</sub>), 7.29 (d, J = 8.6 Hz, 2H, 3/5<sub>pBA</sub>), 6.89 (s, 2H, 2/6<sub>S</sub>), 6.79 (d, J = 15.9 Hz, 1H, α), 6.53 (d, J = 15.9 Hz, 1H, β), 3.83 (s, 6H, OMe); <sup>13</sup>C NMR (acetone-*d*<sub>6</sub>) δ 169.34 (Ac-*d*<sub>3</sub>), 168.54 (Ac-*d*<sub>3</sub>), 165.83 (9), 155.71 (4<sub>pBA</sub>), 153.36 (3/5<sub>S</sub>), 135.62 (1<sub>S</sub>), 134.60 (α), 131.76 (2/6<sub>pBA</sub>), 129.64 (1<sub>S</sub>), 128.55 (1<sub>pBA</sub>), 124.65 (β), 122.97 (3/5<sub>pBA</sub>), 104.19 (2/6<sub>S</sub>), 56.44 (OMe); HRMS(ESI) *m/z* calcd for [M+NH<sub>4</sub>]<sup>+</sup> = 440.2155, meas. 440.2155.

**13<sub>G-DDpCA-d10</sub>**: <sup>1</sup>H NMR (acetone-*d*<sub>6</sub>) δ 7.28 (d, J = 8.5 Hz, 2H, 2/6<sub>pCA</sub>), 7.21 (s, 1H, 2<sub>G</sub>), 7.03-6.99 (m, 4H, 3/5<sub>pCA</sub>/5<sub>G</sub>/6<sub>G</sub>), 6.67 (d, J = 15.9 Hz, 1H, α), 6.33 (d, J = 15.9 Hz, 1H, β), 3.85 (s, 3H, OMe), 2.96-2.90 (m, 1H, 7), 2.70-2.64 (m, 1H, 8); <sup>13</sup>C NMR (acetone-*d*<sub>6</sub>) δ 172.70 (9), 169.75 (Ac-*d*<sub>3</sub>), 168.98 (Ac-*d*<sub>3</sub>), 152.43 (3<sub>G</sub>), 150.31 (4<sub>pCA</sub>), 140.76 (4<sub>G</sub>), 139.12-139.00 (m, 1<sub>pCA</sub>), 136.25 (1<sub>G</sub>), 133.87 (α), 130.08 (2/6<sub>pCA</sub>), 124.69 (β), 123.78 (5<sub>G</sub>), 122.51 (6<sub>G</sub>), 119.99 (3/5<sub>pCA</sub>), 111.06 (2<sub>G</sub>), 56.20 (OMe); HRMS(ESI) *m/z* calcd for [M+NH<sub>4</sub>]<sup>+</sup> = 440.2488, meas. 440.2476.

**13<sub>S-DDpCA-d10</sub>**: <sup>1</sup>H NMR (acetone-*d*<sub>6</sub>) δ 7.28 (d, J = 8.4 Hz, 2H, 2/6<sub>pCA</sub>), 7.01 (d, J = 8.5 Hz, 2H, 3/5<sub>pCA</sub>), 6.83 (s, 2H, 2/6<sub>S</sub>), 6.65 (d, J = 15.9 Hz, 1H, α), 6.35 (d, J = 15.9 Hz, 1H, β), 3.83 (s, 6H, OMe), 2.97-2.90 (m, 1H, 7), 2.71-2.64 (m, 1H, 8); <sup>13</sup>C NMR (acetone-*d*<sub>6</sub>) δ 172.70 (9), 169.76 (Ac-*d*<sub>3</sub>), 168.55 (Ac-*d*<sub>3</sub>), 153.34 (3/5<sub>S</sub>), 150.32 (4<sub>pCA</sub>), 139.09 (1<sub>pCA</sub>), 135.64 (1<sub>S</sub>), 134.33 (α), 130.08 (2/6<sub>pCA</sub>), 129.59 (1<sub>S</sub>), 124.77 (β), 122.52 (3/5<sub>pCA</sub>), 104.10 (2/6<sub>S</sub>), 56.43 (OMe); HRMS(ESI) *m/z* calcd for [M+NH<sub>4</sub>]<sup>+</sup> = 470.2594, meas. 470.2578.

**13<sub>G-DDFA-d10</sub>**: <sup>1</sup>H NMR (acetone-*d*<sub>6</sub>) δ 7.21 (broad s, 1H, 2<sub>FA</sub>), 7.04-6.99 (m, 3H, 2<sub>G</sub>/6<sub>G</sub>/5<sub>FA</sub>), 6.93 (d, J = 8.1 Hz, 1H, 5<sub>G</sub>), 6.82 (dd, J = 8.0, 1.8 Hz, 1H, 6<sub>FA</sub>), 6.67 (d, J = 15.9 Hz, 1H, 7), 6.34 (d, J = 15.9 Hz, 1H, 8), 3.85 (s, 3H, OMe<sub>FA</sub>), 3.78 (s, 3H, OMe<sub>G</sub>), 2.96-2.89 (m, 1H, 7), 2.72-2.65 (m, 1H, 8); <sup>13</sup>C NMR (acetone-*d*<sub>6</sub>) δ 172.76 (9), 169.11 (Ac-*d*<sub>3</sub>), 168.98 (Ac-*d*<sub>3</sub>), 152.43 (3<sub>FA</sub>), 152.09 (3<sub>G</sub>), 140.77 (4<sub>FA</sub>), 140.54 (1<sub>FA</sub>), 139.26 (4<sub>G</sub>), 136.24 (1<sub>G</sub>), 133.89 (7), 124.70 (8), 123.78 (5<sub>FA</sub>), 123.42 (5<sub>G</sub>), 121.01 (6<sub>FA</sub>), 119.99 (6<sub>G</sub>), 113.56 (2<sub>G</sub>), 111.06 (2<sub>FA</sub>), 56.20 (OMe<sub>FA</sub>), 56.08 (OMe<sub>G</sub>); HRMS(ESI) *m/z* calcd for [M+NH<sub>4</sub>]<sup>+</sup> = 470.2594, meas. 470.2578.

**13S-DDFA-d10**:  $^1\text{H}$  NMR (acetone- $d_6$ )  $\delta$  7.01 (d,  $J = 1.6$  Hz, 1H, 2<sub>FA</sub>), 6.93 (d,  $J = 8.1$  Hz, 1H, 5<sub>FA</sub>), 6.83 (s, 2H, 2/6<sub>S</sub>), 6.83-6.80 (m, 1H, 6<sub>FA</sub>), 6.65 (d,  $J = 15.9$  Hz, 1H,  $\alpha$ ), 6.36 (d,  $J = 15.9$  Hz, 1H,  $\beta$ ), 3.83 (s, 6H, OMe<sub>S</sub>), 3.78 (s, 3H, OMe<sub>FA</sub>), 2.96-2.89 (m, 1H, 7), 2.72-2.65 (m, 1H, 8);  $^{13}\text{C}$  NMR (acetone- $d_6$ )  $\delta$  172.76 (9), 169.11 (Ac- $d_3$ ), 168.56 (Ac- $d_3$ ), 153.34 (3/5<sub>S</sub>), 152.09 (3<sub>FA</sub>), 140.54 (1<sub>FA</sub>), 139.26 (4<sub>FA</sub>), 135.63 (1<sub>S</sub>), 134.33 ( $\alpha$ ), 129.60 (4<sub>S</sub>), 124.78 ( $\beta$ ), 123.43 (5<sub>FA</sub>), 121.02 (6<sub>FA</sub>), 113.57 (2<sub>FA</sub>), 104.10 (2/6<sub>S</sub>), 56.43 (OMe<sub>S</sub>), 56.09 (OMe<sub>FA</sub>); HRMS(ESI)  $m/z$  calcd for  $[\text{M}+\text{NH}_4]^+ = 500.2699$ , meas. 500.2684.

**13G-DDSA-d10**:  $^1\text{H}$  NMR (acetone- $d_6$ )  $\delta$  7.21 (s, 1H, 2<sub>G</sub>), 7.04-7.00 (m, 2H, 5<sub>G</sub>/6<sub>G</sub>), 6.68 (d,  $J = 16.0$  Hz, 1H,  $\alpha$ ), 6.63 (s, 2H, 2/6<sub>SA</sub>), 6.35 (d,  $J = 15.9$  Hz, 1H,  $\beta$ ), 3.85 (s, 3H, OMe<sub>G</sub>), 3.76 (s, 6H, OMe<sub>SA</sub>), 2.94-2.88 (m, 1H, 7), 2.72-2.66 (m, 1H, 8);  $^{13}\text{C}$  NMR (acetone- $d_6$ )  $\delta$  172.79 (9), 168.99 (Ac- $d_3$ ), 168.69 (Ac- $d_3$ ), 153.05 (3/5<sub>SA</sub>), 152.44 (3<sub>G</sub>), 140.78 (4<sub>G</sub>), 140.12 (1<sub>SA</sub>), 136.23 (1<sub>G</sub>), 133.91 ( $\alpha$ ), 128.03 (4<sub>SA</sub>), 124.71 ( $\beta$ ), 123.79 (5<sub>G</sub>), 119.99 (6<sub>G</sub>), 111.05 (2<sub>G</sub>), 105.78 (2/6<sub>SA</sub>), 56.32 (OMe<sub>SA</sub>), 56.20 (OMe<sub>G</sub>); HRMS(ESI)  $m/z$  calcd for  $[\text{M}+\text{NH}_4]^+ = 500.2699$ , meas. 500.2683.

**13S-DDSA-d10**:  $^1\text{H}$  NMR (acetone- $d_6$ )  $\delta$  6.83 (s, 2H, 2/6<sub>S</sub>), 6.65 (d,  $J = 18.0$  Hz, 1H,  $\alpha$ ), 6.63 (s, 2H, 2/6<sub>SA</sub>), 6.36 (d,  $J = 15.9$  Hz, 1H,  $\beta$ ), 3.83 (s, 6H, OMe<sub>S</sub>), 3.76 (s, 6H, OMe<sub>SA</sub>), 2.94-2.88 (m, 1H, 7), 2.73-2.66 (m, 1H, 8);  $^{13}\text{C}$  NMR (acetone- $d_6$ )  $\delta$  172.79 (9), 168.69 (OAc- $d_3$ ), 168.56 (OAc- $d_3$ ), 153.34 (3/5<sub>S</sub>), 153.05 (3/5<sub>SA</sub>), 140.12 (1<sub>SA</sub>), 135.62 (1<sub>S</sub>), 134.33 ( $\alpha$ ), 129.60 (4<sub>S</sub>), 128.03 (4<sub>SA</sub>), 124.79 ( $\beta$ ), 105.78 (2/6<sub>SA</sub>), 104.09 (2/6<sub>S</sub>), 56.43 (OMe<sub>S</sub>), 56.32 (OMe<sub>SA</sub>), 36.18-35.71 (m, 8), 31.88-31.33 (m, 7); HRMS(ESI)  $m/z$  calcd for  $[\text{M}+\text{NH}_4]^+ = 530.2805$ , meas. 530.2796.

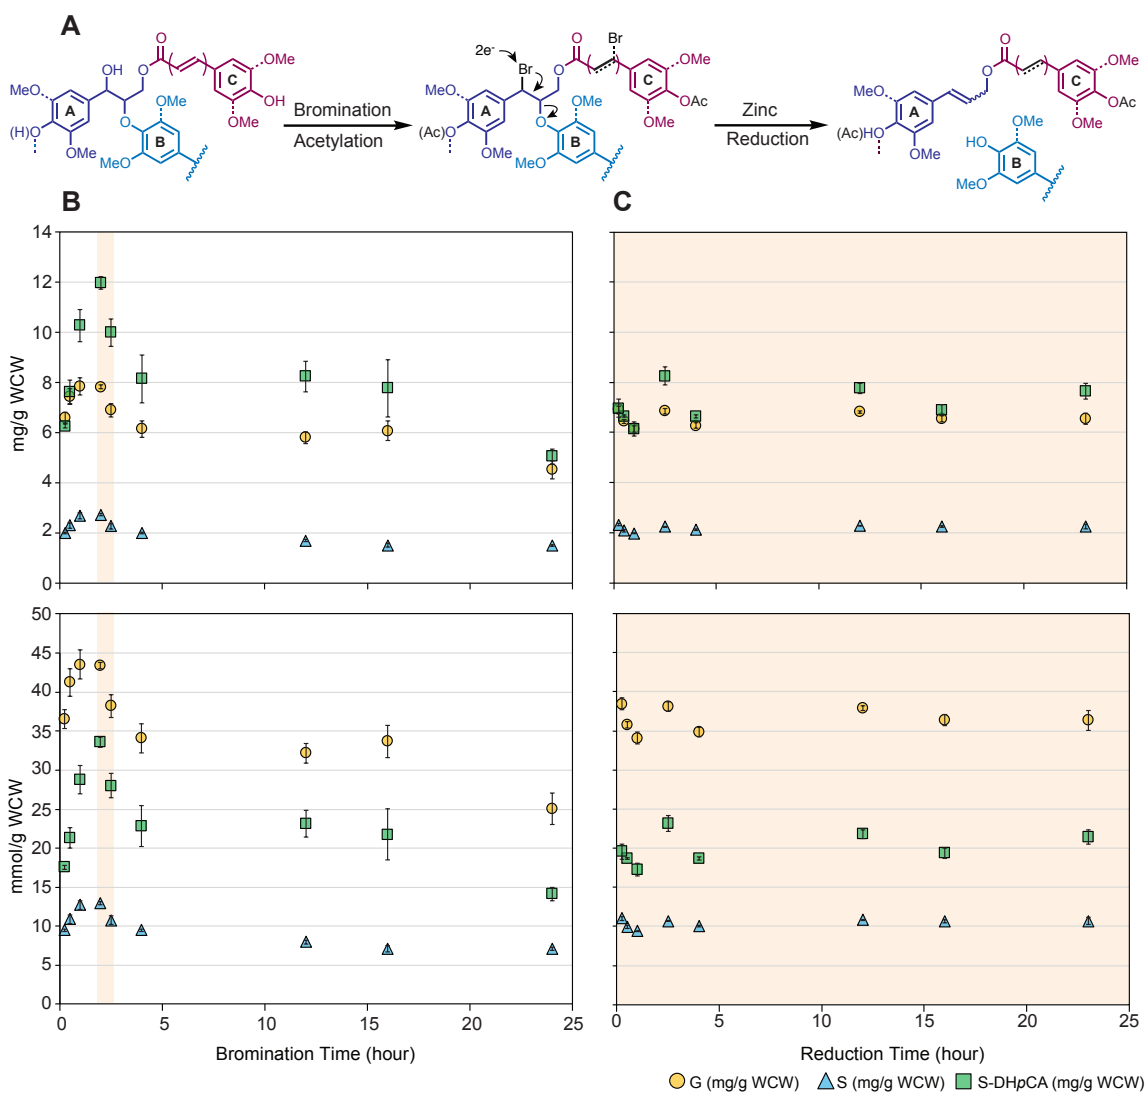

**Figure S1** **A**) Acetylation of hydroxyl units and bromination of benzylic positions by AcBr/HOAc (derivatization) and two-electron reductive cleavage *via* Zn/HOAc in the DFRC method. Optimization of reaction kinetics was performed on extract-free corn stover. **B**) Product yields as a function of bromination time. **C**) Product yields as a function of Zn reduction time. Average values of G, S, and S-DHpCA are reported in terms of mg/g (top) or mmol/g (bottom) of corn stover cell wall, with error bars corresponding to a sample size of  $n = 3$ . Back-ground color in graph corresponds to “optimized” bromination time ( $\sim 2.5$  h) used for all Zn reduction trials. Kinetic data for the final acetylation step are not included here, as any remaining alcohols are acetylated almost immediately after the addition of acetic anhydride and pyridine.

**Table S1. Chromatography program for GC/MS/MS characterization of DFRC product mix.**

| <b>Gas Chromatograph</b> | <b>GC-2010 Plus</b>                                                                                                        |
|--------------------------|----------------------------------------------------------------------------------------------------------------------------|
| Inlet                    | 250 °C<br>Split liner with glass wool (Shimadzu 220-90784-00)<br>Split injection (20:1)                                    |
| Column                   | RXi-5Sil MS 30 m x 0.25 mm x 0.25 µm (Restek 13623)<br>Helium carrier gas<br>Constant linear velocity 45.0 cm/sec          |
| Oven Program             | 150 °C, hold 1 minute, ramp 10 °C/minute to 300 °C, hold 29.0 minutes<br>MS interface 300 °C<br>Analysis time 45.0 minutes |
| <b>Mass Spectrometer</b> | <b>GCMS-TQ8030</b>                                                                                                         |
| Ion Source               | 300 °C<br>Electron ionization (EI) mode, 70 eV                                                                             |
| Operation Mode           | Multiple Reaction Monitoring (MRM)<br>Argon gas, 200 kPa<br>Q1 resolution 0.8 u (Unit), Q3 resolution 0.8 u (Unit)         |
| Detector                 | Electron multiplier<br>0.97 kV                                                                                             |

**Table S2.** MRM parameters for GC/MS/MS characterization of DFRC product mix.

| Compound Name                                                                                                                                                                   | Retention Time (min)                       | Transition 1 | CE 1 | Rel. Int. | Transition 2 | CE 2 | Rel. Int. | Transition 3 | CE 3 | Rel. Int. | Transition 4 | CE 4 | Rel. Int. |
|---------------------------------------------------------------------------------------------------------------------------------------------------------------------------------|--------------------------------------------|--------------|------|-----------|--------------|------|-----------|--------------|------|-----------|--------------|------|-----------|
| 4-acetoxycoumaryl acetate (H-Ac)                                                                                                                                                | <i>cis</i> : 6.07<br><i>trans</i> : 6.63   | 234→192      | 11   | 100       | 234→150      | 20   | 38        | 234→149      | 20   | 35        |              |      |           |
| 4-acetoxyconiferyl acetate (G-Ac)                                                                                                                                               | <i>cis</i> : 7.42<br><i>trans</i> : 8.21   | 264→222      | 15   | 100       | 264→179      | 20   | 72        | 264→124      | 26   | 32        |              |      |           |
| 4-acetoxysinapyl acetate (S-Ac)                                                                                                                                                 | <i>cis</i> : 8.89<br><i>trans</i> : 9.78   | 294→252      | 15   | 100       | 294→161      | 25   | 15        | 294→149      | 26   | 15        |              |      |           |
| 4-acetoxyconiferyl <i>p</i> -acetoxybenzoate (G-pB)                                                                                                                             | <i>cis</i> : 15.52<br><i>trans</i> : 16.56 | 342→121      | 10   | 100       | 342→163      | 15   | 168       | 342→179      | 5    | 191       |              |      |           |
| 4-acetoxysinapyl <i>p</i> -acetoxybenzoate (S-pB)                                                                                                                               | <i>cis</i> : 16.48<br><i>trans</i> : 17.91 | 372→121      | 10   | 100       | 372→163      | 15   | 165       | 372→209      | 10   | 162       |              |      |           |
| 4-acetoxyconiferyl 7,8-dihydro- <i>p</i> -acetoxycoumarate (G-DHpCA)                                                                                                            | <i>cis</i> : 16.70<br><i>trans</i> : 17.30 | 370→131      | 22   | 100       | 370→179      | 10   | 27        | 370→163      | 14   | 76        | 370→107      | 30   | 24        |
| 4-acetoxysinapyl 7,8-dihydro- <i>p</i> -acetoxycoumarate (S-DHpCA)                                                                                                              | <i>cis</i> : 17.86<br><i>trans</i> : 18.71 | 400→161      | 18   | 100       | 400→193      | 14   | 63        | 400→149      | 18   | 57        | 400→107      | 30   | 49        |
| 4-acetoxyconiferyl 7,8-dihydro-4-acetoxyferulate (G-DHFA)                                                                                                                       | <i>cis</i> : 18.07<br><i>trans</i> : 18.51 | 400→163      | 14   | 100       | 400→131      | 26   | 86        | 358→163      | 10   | 90        | 358→131      | 26   | 77        |
| 4-acetoxysinapyl 7,8-dihydro-4-acetoxyferulate (S-DHFA)                                                                                                                         | <i>cis</i> : 18.93<br><i>trans</i> : 20.22 | 430→161      | 26   | 100       | 430→193      | 14   | 89        | 388→161      | 22   | 120       | 388→193      | 10   | 147       |
| 4-acetoxyconiferyl 7,8-dihydro-4-acetoxy sinapate (G-DHSA)                                                                                                                      | <i>cis</i> : 19.71<br><i>trans</i> : 21.21 | 430→163      | 14   | 100       | 430→225      | 14   | 158       | 388→131      | 26   | 84        | 388→225      | 6    | 89        |
| 4-acetoxysinapyl 7,8-dihydro-4-acetoxy sinapate (S-DHSA)                                                                                                                        | <i>cis</i> : 21.75<br><i>trans</i> : 23.36 | 460→161      | 26   | 100       | 460→418      | 10   | 143       | 418→193      | 10   | 250       | 418→161      | 22   | 212       |
| $\gamma,\gamma$ -dideutero-4-( <i>d</i> <sub>3</sub> -acetoxy)-coumaryl- <i>d</i> <sub>3</sub> -acetate (H- <i>d</i> <sub>3</sub> )                                             | <i>trans</i> : 6.51                        | 242→198      | 11   | 100       | 242→152      | 20   | 35        | 242→154      | 20   | 25        |              |      |           |
| $\gamma,\gamma$ -dideutero-4-( <i>d</i> <sub>3</sub> -acetoxy)-coniferyl <i>d</i> <sub>3</sub> -acetate (G- <i>d</i> <sub>3</sub> )                                             | <i>trans</i> : 8.11                        | 272→228      | 15   | 100       | 272→182      | 20   | 66        | 272→126      | 26   | 17        |              |      |           |
| $\gamma,\gamma$ -dideutero-4-( <i>d</i> <sub>3</sub> -acetoxy)-sinapyl <i>d</i> <sub>3</sub> -acetate (S- <i>d</i> <sub>3</sub> )                                               | <i>trans</i> : 9.70                        | 302→258      | 15   | 100       | 302→163      | 25   | 20        | 302→151      | 26   | 12        |              |      |           |
| $\gamma,\gamma$ -dideutero-4-( <i>d</i> <sub>3</sub> -acetoxy)-coniferyl <i>p</i> -( <i>d</i> <sub>3</sub> -acetoxy)-benzoate (G-pB- <i>d</i> <sub>3</sub> )                    | <i>trans</i> : 16.49                       | 348→122      | 5    | 100       | 348→166      | 15   | 86        | 348→182      | 10   | 1         |              |      |           |
| $\gamma,\gamma$ -dideutero-4-( <i>d</i> <sub>3</sub> -acetoxy)-sinapyl <i>p</i> -( <i>d</i> <sub>3</sub> -acetoxy)-benzoate (S-pB- <i>d</i> <sub>3</sub> )                      | <i>trans</i> : 17.83                       | 378→122      | 5    | 100       | 378→166      | 15   | 88        | 378→212      | 10   | 1         |              |      |           |
| $\gamma,\gamma$ -dideutero-4-( <i>d</i> <sub>3</sub> -acetoxy)-coniferyl 7,8-dideutero- <i>p</i> -( <i>d</i> <sub>3</sub> -acetoxy)coumarate (G-DDpCA- <i>d</i> <sub>10</sub> ) | <i>trans</i> : 17.21                       | 377→133      | 22   | 100       | 377→182      | 10   | 31        | 377→166      | 14   | 69        | 377→109      | 30   | 16        |
| $\gamma,\gamma$ -dideutero-4-( <i>d</i> <sub>3</sub> -acetoxy)-sinapyl 7,8-dideutero- <i>p</i> -( <i>d</i> <sub>3</sub> -acetoxy)coumarate (S-DDpCA- <i>d</i> <sub>10</sub> )   | <i>trans</i> : 18.60                       | 407→163      | 18   | 100       | 407→196      | 14   | 60        | 407→151      | 18   | 50        | 407→109      | 30   | 33        |
| $\gamma,\gamma$ -dideutero-4-( <i>d</i> <sub>3</sub> -acetoxy)-coniferyl 7,8-dideutero-4-( <i>d</i> <sub>3</sub> -acetoxy)ferulate (G-DDFA- <i>d</i> <sub>10</sub> )            | <i>trans</i> : 18.40                       | 408→166      | 14   | 100       | 408→133      | 26   | 82        | 364→166      | 10   | 65        | 364→133      | 26   | 55        |
| $\gamma,\gamma$ -dideutero-4-( <i>d</i> <sub>3</sub> -acetoxy)-sinapyl 7,8-dideutero-4-( <i>d</i> <sub>3</sub> -acetoxy)ferulate (S-DDFA- <i>d</i> <sub>10</sub> )              | <i>trans</i> : 20.10                       | 437→163      | 26   | 100       | 437→196      | 14   | 99        | 393→164      | 10   | 52        | 393→196      | 5    | 40        |
| $\gamma,\gamma$ -dideutero-4-( <i>d</i> <sub>3</sub> -acetoxy)-coniferyl 7,8-dideutero-4-( <i>d</i> <sub>3</sub> -acetoxy)sinapate (G-DDSA- <i>d</i> <sub>10</sub> )            | <i>trans</i> : 20.53                       | 437→166      | 14   | 100       | 437→133      | 14   | 9         | 393→133      | 26   | 68        | 393→227      | 6    | 69        |
| $\gamma,\gamma$ -dideutero-4-( <i>d</i> <sub>3</sub> -acetoxy)-sinapyl 7,8-dideutero-4-( <i>d</i> <sub>3</sub> -acetoxy)sinapate (S-DDSA- <i>d</i> <sub>10</sub> )              | <i>trans</i> : 22.84                       | 467→164      | 26   | 100       | 467→423      | 5    | 64        | 423→196      | 5    | 67        | 423→164      | 15   | 142       |

**Table S3.** MRM parameters for GC/MS quantitation of DFRC product mix.

| Compound Name                                                                                                                                                                | Retention Time (min)                       | Target ion | Rel. Int. | Reference ion 1 | Rel. Int. | Reference ion 2 | Rel. Int. | Reference ion 3 | Rel. Int. |
|------------------------------------------------------------------------------------------------------------------------------------------------------------------------------|--------------------------------------------|------------|-----------|-----------------|-----------|-----------------|-----------|-----------------|-----------|
| 4-acetoxycoumaryl acetate ( <b>H-Ac</b> )                                                                                                                                    | <i>cis</i> : 6.07<br><i>trans</i> : 6.63   | 234        | 100       | 150             | 38        | 149             | 35        |                 |           |
| 4-acetoxycoumaryl acetate ( <b>G-Ac</b> )                                                                                                                                    | <i>cis</i> : 7.42<br><i>trans</i> : 8.21   | 264        | 100       | 179             | 72        | 124             | 32        |                 |           |
| 4-acetoxysinapyl acetate ( <b>S-Ac</b> )                                                                                                                                     | <i>cis</i> : 8.89<br><i>trans</i> : 9.78   | 294        | 100       | 161             | 15        | 149             | 15        |                 |           |
| 4-acetoxycoumaryl <i>p</i> -acetoxibenzoate ( <b>G-pB</b> )                                                                                                                  | <i>cis</i> : 15.52<br><i>trans</i> : 16.56 | 342        | 100       | 163             | 168       | 179             | 191       |                 |           |
| 4-acetoxysinapyl <i>p</i> -acetoxibenzoate ( <b>S-pB</b> )                                                                                                                   | <i>cis</i> : 16.48<br><i>trans</i> : 17.91 | 372        | 100       | 163             | 165       | 209             | 162       |                 |           |
| 4-acetoxycoumaryl 7,8-dihydro- <i>p</i> -acetoxycoumarate ( <b>G-DHpCA</b> )                                                                                                 | <i>cis</i> : 16.70<br><i>trans</i> : 17.30 | 370        | 100       | 179             | 27        | 163             | 76        | 107             | 24        |
| 4-acetoxysinapyl 7,8-dihydro- <i>p</i> -acetoxycoumarate ( <b>S-DHpCA</b> )                                                                                                  | <i>cis</i> : 17.86<br><i>trans</i> : 18.71 | 400        | 100       | 193             | 63        | 149             | 57        | 107             | 49        |
| 4-acetoxycoumaryl 7,8-dihydro-4-acetoxiferulate ( <b>G-DHFA</b> )                                                                                                            | <i>cis</i> : 18.07<br><i>trans</i> : 18.51 | 400        | 100       | 131             | 86        | 163             | 90        | 358             | 77        |
| 4-acetoxysinapyl 7,8-dihydro-4-acetoxiferulate ( <b>S-DHFA</b> )                                                                                                             | <i>cis</i> : 18.93<br><i>trans</i> : 20.22 | 430        | 100       | 193             | 89        | 161             | 120       | 388             | 147       |
| 4-acetoxycoumaryl 7,8-dihydro-4-acetoxysinapate ( <b>G-DHSA</b> )                                                                                                            | <i>cis</i> : 19.71<br><i>trans</i> : 21.21 | 430        | 100       | 225             | 158       | 131             | 84        | 388             | 89        |
| 4-acetoxysinapyl 7,8-dihydro-4-acetoxysinapate ( <b>S-DHSA</b> )                                                                                                             | <i>cis</i> : 21.75<br><i>trans</i> : 23.36 | 460        | 100       | 418             | 143       | 193             | 250       | 161             | 212       |
| $\gamma,\gamma$ -dideutero-4-( <i>d</i> <sub>3</sub> -acetoxycoumaryl- <i>d</i> <sub>3</sub> -acetate ( <b>H-d<sub>3</sub></b> ))                                            | <i>trans</i> : 6.51                        | 242        | 100       | 152             | 35        | 154             | 25        |                 |           |
| $\gamma,\gamma$ -dideutero-4-( <i>d</i> <sub>3</sub> -acetoxycoumaryl- <i>d</i> <sub>3</sub> -acetate ( <b>G-d<sub>3</sub></b> ))                                            | <i>trans</i> : 8.11                        | 272        | 100       | 182             | 66        | 126             | 17        |                 |           |
| $\gamma,\gamma$ -dideutero-4-( <i>d</i> <sub>3</sub> -acetoxysinapyl- <i>d</i> <sub>3</sub> -acetate ( <b>S-d<sub>3</sub></b> ))                                             | <i>trans</i> : 9.70                        | 302        | 100       | 163             | 20        | 151             | 12        |                 |           |
| $\gamma,\gamma$ -dideutero-4-( <i>d</i> <sub>3</sub> -acetoxycoumaryl- <i>p</i> -( <i>d</i> <sub>3</sub> -acetoxycoumarate)benzoate ( <b>G-pB-d<sub>3</sub></b> ))           | <i>trans</i> : 16.49                       | 348        | 100       | 166             | 86        | 182             | 1         |                 |           |
| $\gamma,\gamma$ -dideutero-4-( <i>d</i> <sub>3</sub> -acetoxysinapyl- <i>p</i> -( <i>d</i> <sub>3</sub> -acetoxycoumarate)benzoate ( <b>S-pB-d<sub>3</sub></b> ))            | <i>trans</i> : 17.83                       | 378        | 100       | 166             | 88        | 212             | 1         |                 |           |
| $\gamma,\gamma$ -dideutero-4-( <i>d</i> <sub>3</sub> -acetoxycoumaryl 7,8-dideutero- <i>p</i> -( <i>d</i> <sub>3</sub> -acetoxycoumarate) ( <b>G-DDpCA-d<sub>10</sub></b> )) | <i>trans</i> : 17.21                       | 377        | 100       | 182             | 31        | 166             | 69        | 109             | 16        |
| $\gamma,\gamma$ -dideutero-4-( <i>d</i> <sub>3</sub> -acetoxysinapyl 7,8-dideutero- <i>p</i> -( <i>d</i> <sub>3</sub> -acetoxycoumarate) ( <b>S-DDpCA-d<sub>10</sub></b> ))  | <i>trans</i> : 18.60                       | 407        | 100       | 196             | 60        | 151             | 50        | 109             | 33        |
| $\gamma,\gamma$ -dideutero-4-( <i>d</i> <sub>3</sub> -acetoxycoumaryl 7,8-dideutero-4-( <i>d</i> <sub>3</sub> -acetoxycoumarate)ferulate ( <b>G-DDFA-d<sub>10</sub></b> ))   | <i>trans</i> : 18.40                       | 408        | 100       | 133             | 82        | 166             | 65        | 364             | 55        |
| $\gamma,\gamma$ -dideutero-4-( <i>d</i> <sub>3</sub> -acetoxysinapyl 7,8-dideutero-4-( <i>d</i> <sub>3</sub> -acetoxycoumarate)ferulate ( <b>S-DDFA-d<sub>10</sub></b> ))    | <i>trans</i> : 20.10                       | 437        | 100       | 196             | 99        | 164             | 52        | 393             | 40        |
| $\gamma,\gamma$ -dideutero-4-( <i>d</i> <sub>3</sub> -acetoxycoumaryl 7,8-dideutero-4-( <i>d</i> <sub>3</sub> -acetoxysinapate) ( <b>G-DDSA-d<sub>10</sub></b> ))            | <i>trans</i> : 20.53                       | 437        | 100       | 133             | 9         | 393             | 68        | 227             | 69        |
| $\gamma,\gamma$ -dideutero-4-( <i>d</i> <sub>3</sub> -acetoxysinapyl 7,8-dideutero-4-( <i>d</i> <sub>3</sub> -acetoxysinapate) ( <b>S-DDSA-d<sub>10</sub></b> ))             | <i>trans</i> : 22.84                       | 467        | 100       | 423             | 64        | 196             | 67        | 164             | 142       |

## References:

1. Ralph, J.; Helm, R. F.; Quideau, S.; Hatfield, R. D., Lignin-feruloyl ester cross-links in grasses. Part 1. Incorporation of feruloyl esters into coniferyl alcohol dehydrogenation polymers. *Journal of the Chemical Society, Perkin Transactions 1* **1992**, (21), 2961-2969.
2. Helm, R. F.; Ralph, J.; Hatfield, R. D., Synthesis of feruloylated and *p*-coumaroylated methyl glycosides. *Carbohydrate Research* **1992**, 229 (1), 183-194.
3. Lu, F.; Karlen, S. D.; Regner, M.; Kim, H.; Ralph, S. A.; Sun, R.-c.; Kuroda, K.-i.; Augustin, M. A.; Mawson, R.; Sabarez, H.; Singh, T.; Jimenez-Monteon, G.; Hill, S.; Harris, P. J.; Boerjan, W.; Mansfield, S. D.; Ralph, J., Naturally *p*-hydroxybenzoylated lignins in palms. *Bioenerg Res* **2015**, 8 (3), 934-952.
4. Ralph, J.; Ede, R. M.; Wilkins, A. L., Synthesis of trimeric lignin model compounds composed of  $\beta$ -aryl ether and phenylcoumaran structures. *Holzforschung* **1986**, 40 (1), 23-30.
5. Helm, R. F.; Ralph, J., Lignin—hydroxycinnamoyl model compounds related to forage cell wall structure. 2. Ester-linked structures. *Journal of Agricultural and Food Chemistry* **1993**, 41 (4), 570-576.
6. Zhu, Y.; Regner, M.; Lu, F.; Kim, H.; Mohammadi, A.; Pearson, T. J.; Ralph, J., Preparation of monolignol  $\gamma$ -acetate,  $\gamma$ -*p*-hydroxycinnamate, and  $\gamma$ -*p*-hydroxybenzoate conjugates: Selective deacylation of phenolic acetates with hydrazine acetate. *Rsc Adv* **2013**, 3 (44), 21964-21971.
7. Helm, R. F.; Ralph, J., Lignin—hydroxycinnamyl model compounds related to forage cell wall structure. 1. Ether-linked structures. *Journal of Agricultural and Food Chemistry* **1992**, 40 (11), 2167-2175.
8. Schäfer, J.; Urvat, F.; Rund, K.; Bunzel, M., A stable-isotope dilution GC-MS approach for the analysis of DFRC (derivatization followed by reductive cleavage) monomers from low-lignin plant materials. *Journal of Agricultural and Food Chemistry* **2015**, 63 (10), 2668-2673.



**Figure S1** - Comparison of  $^1\text{H}$  NMR spectra for quantitation of G-*p*CA relative to G-DH*p*CA after DFRC.

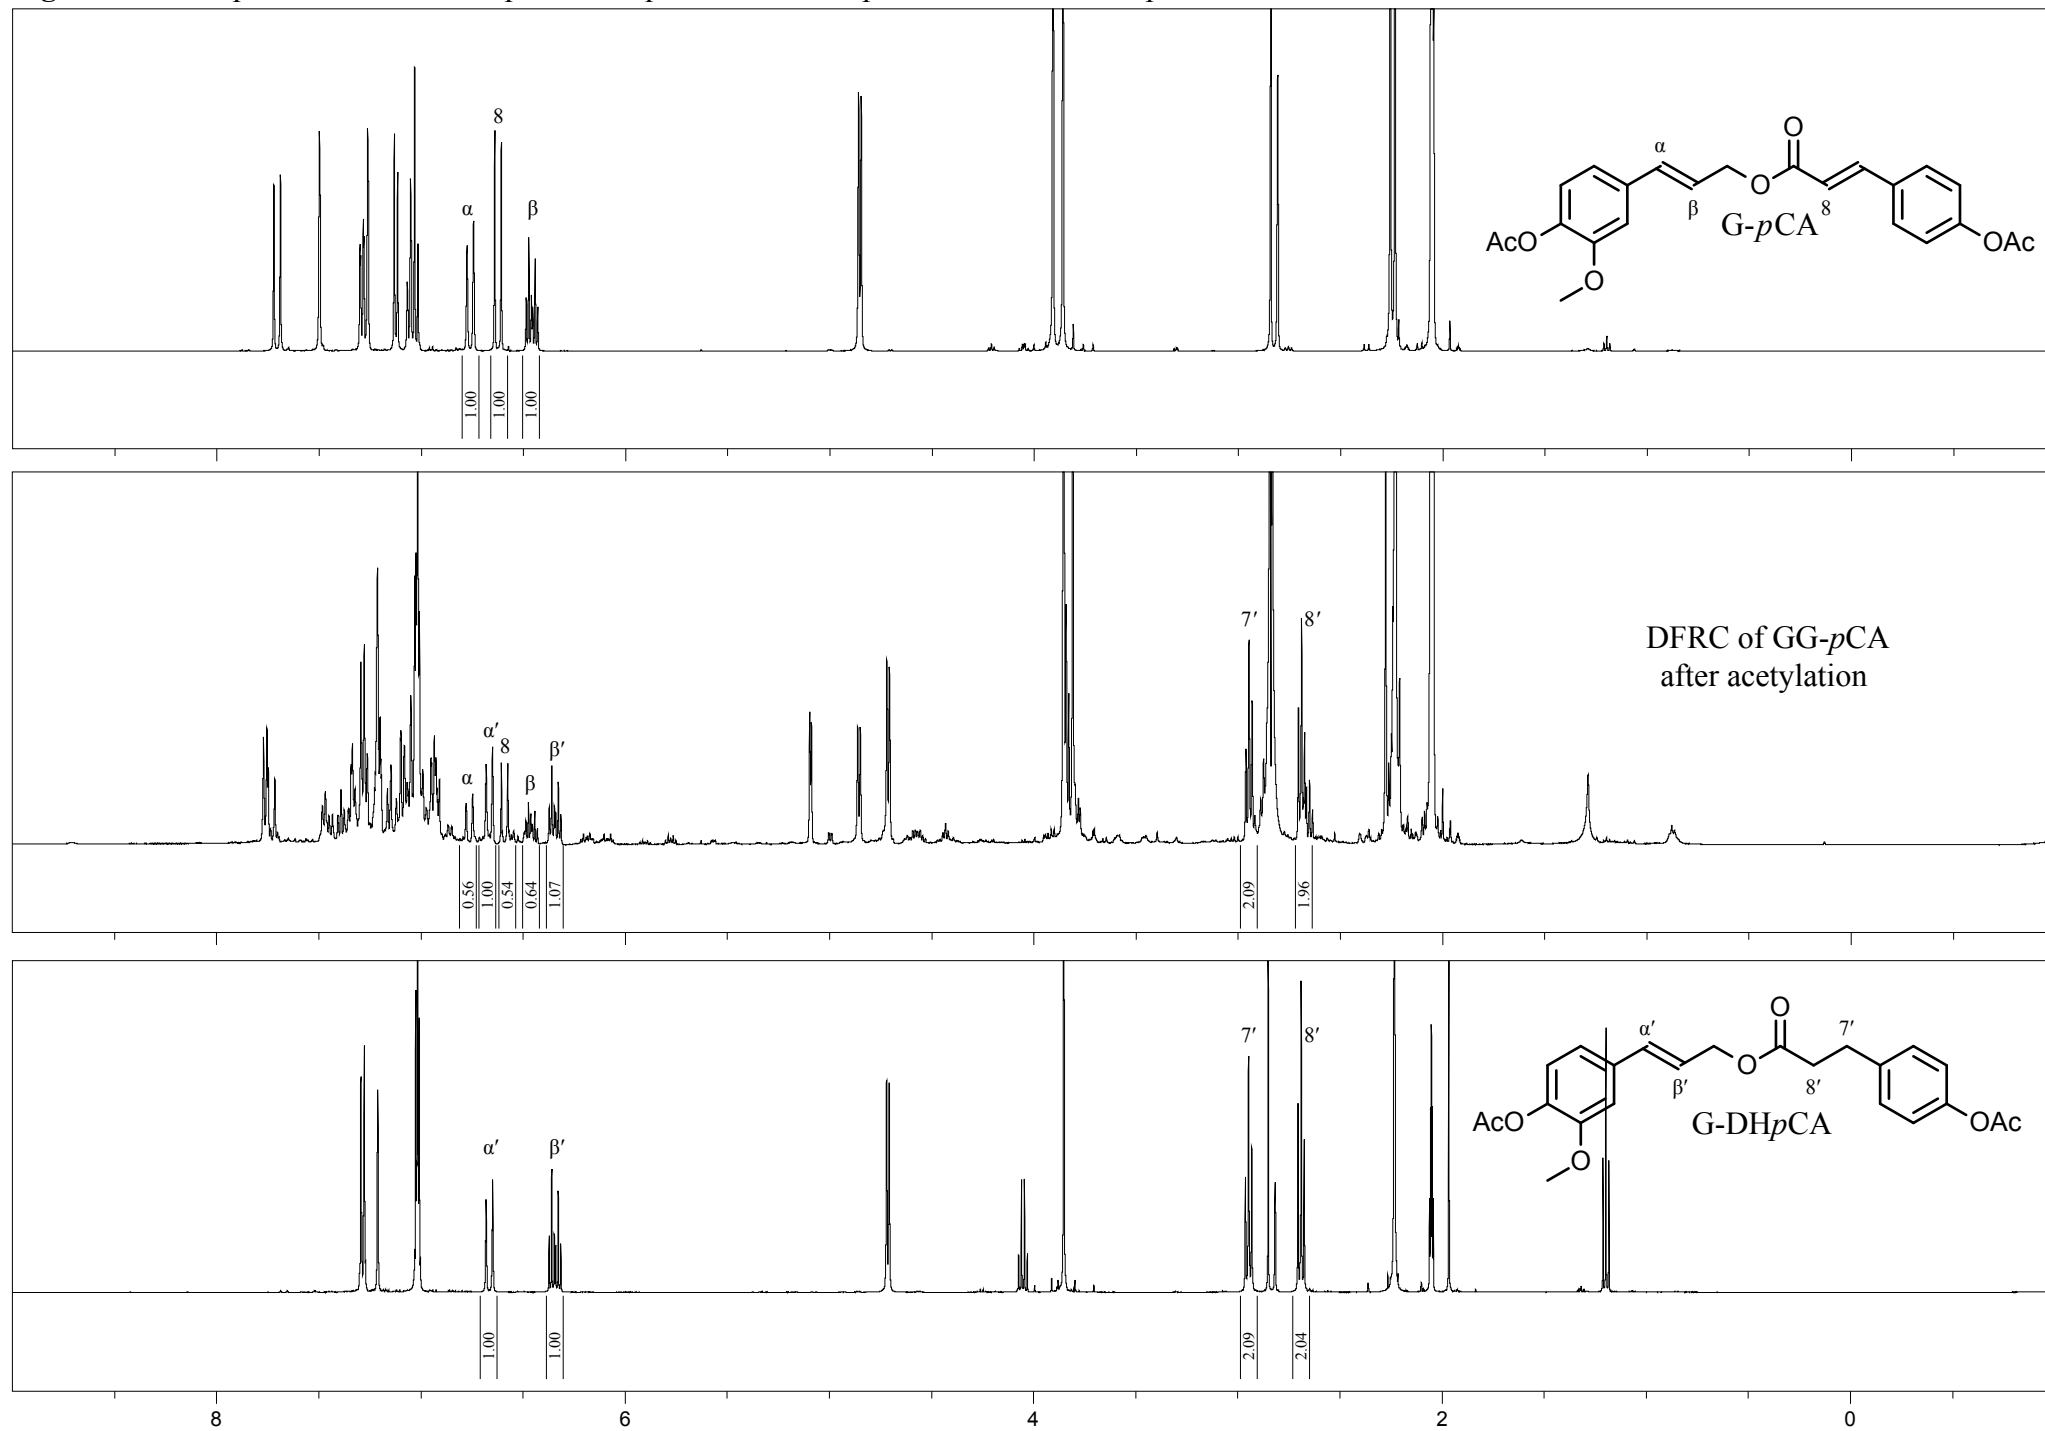

**Figure S2** - Comparison of  $^1\text{H}$  NMR spectra for quantitation of G-FA relative to G-DHFA after DFRC.

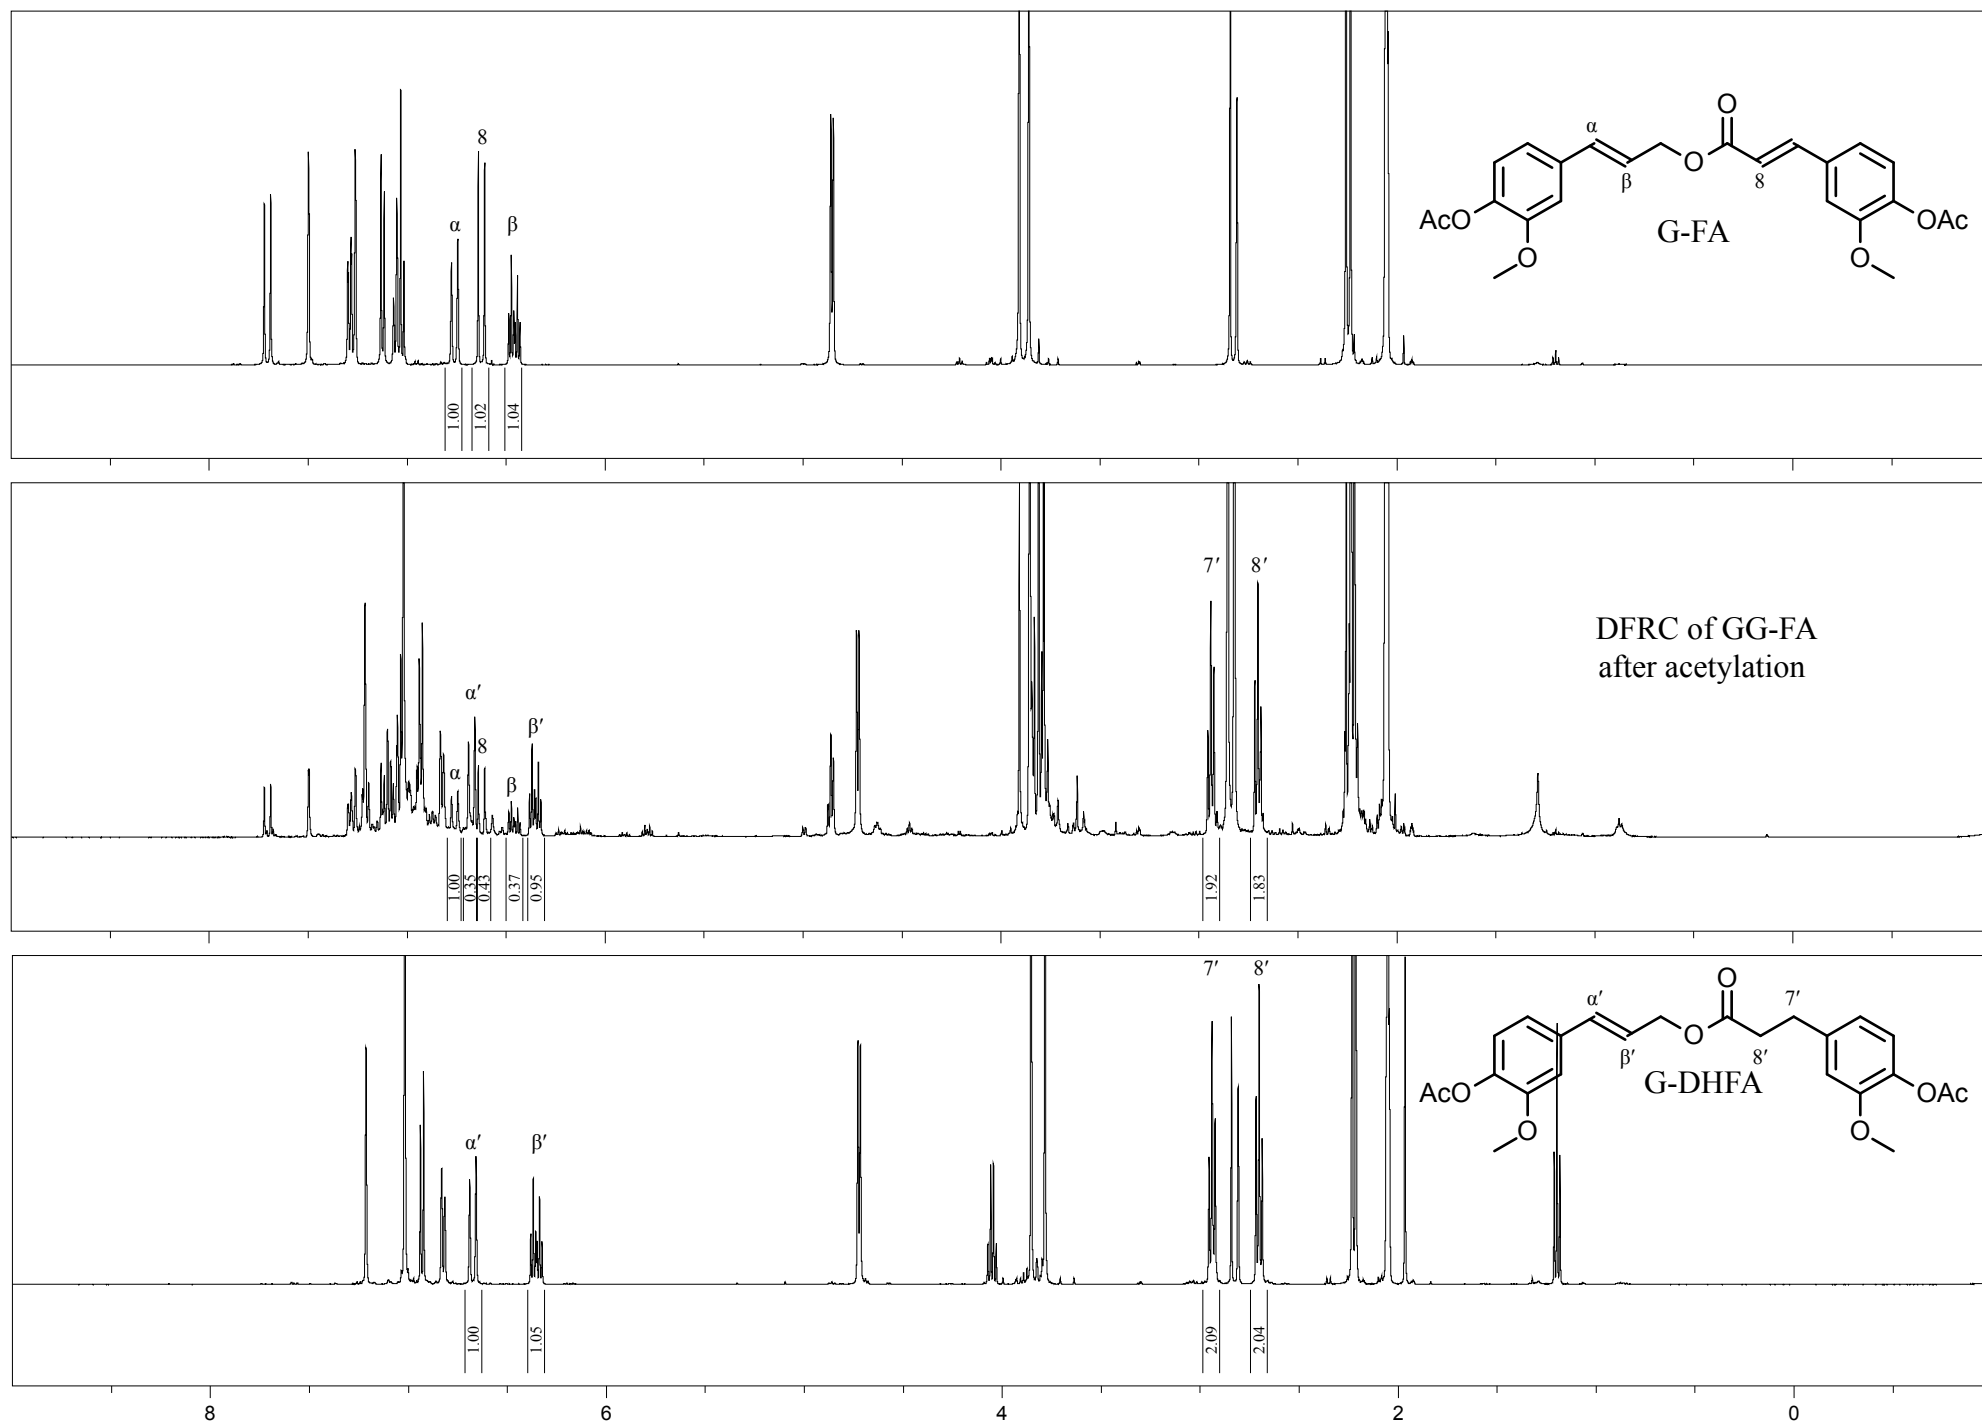

**Figure S3** - Comparison of  $^1\text{H}$  NMR spectra for quantitation of G-SA relative to G-DHSA after DFRC.

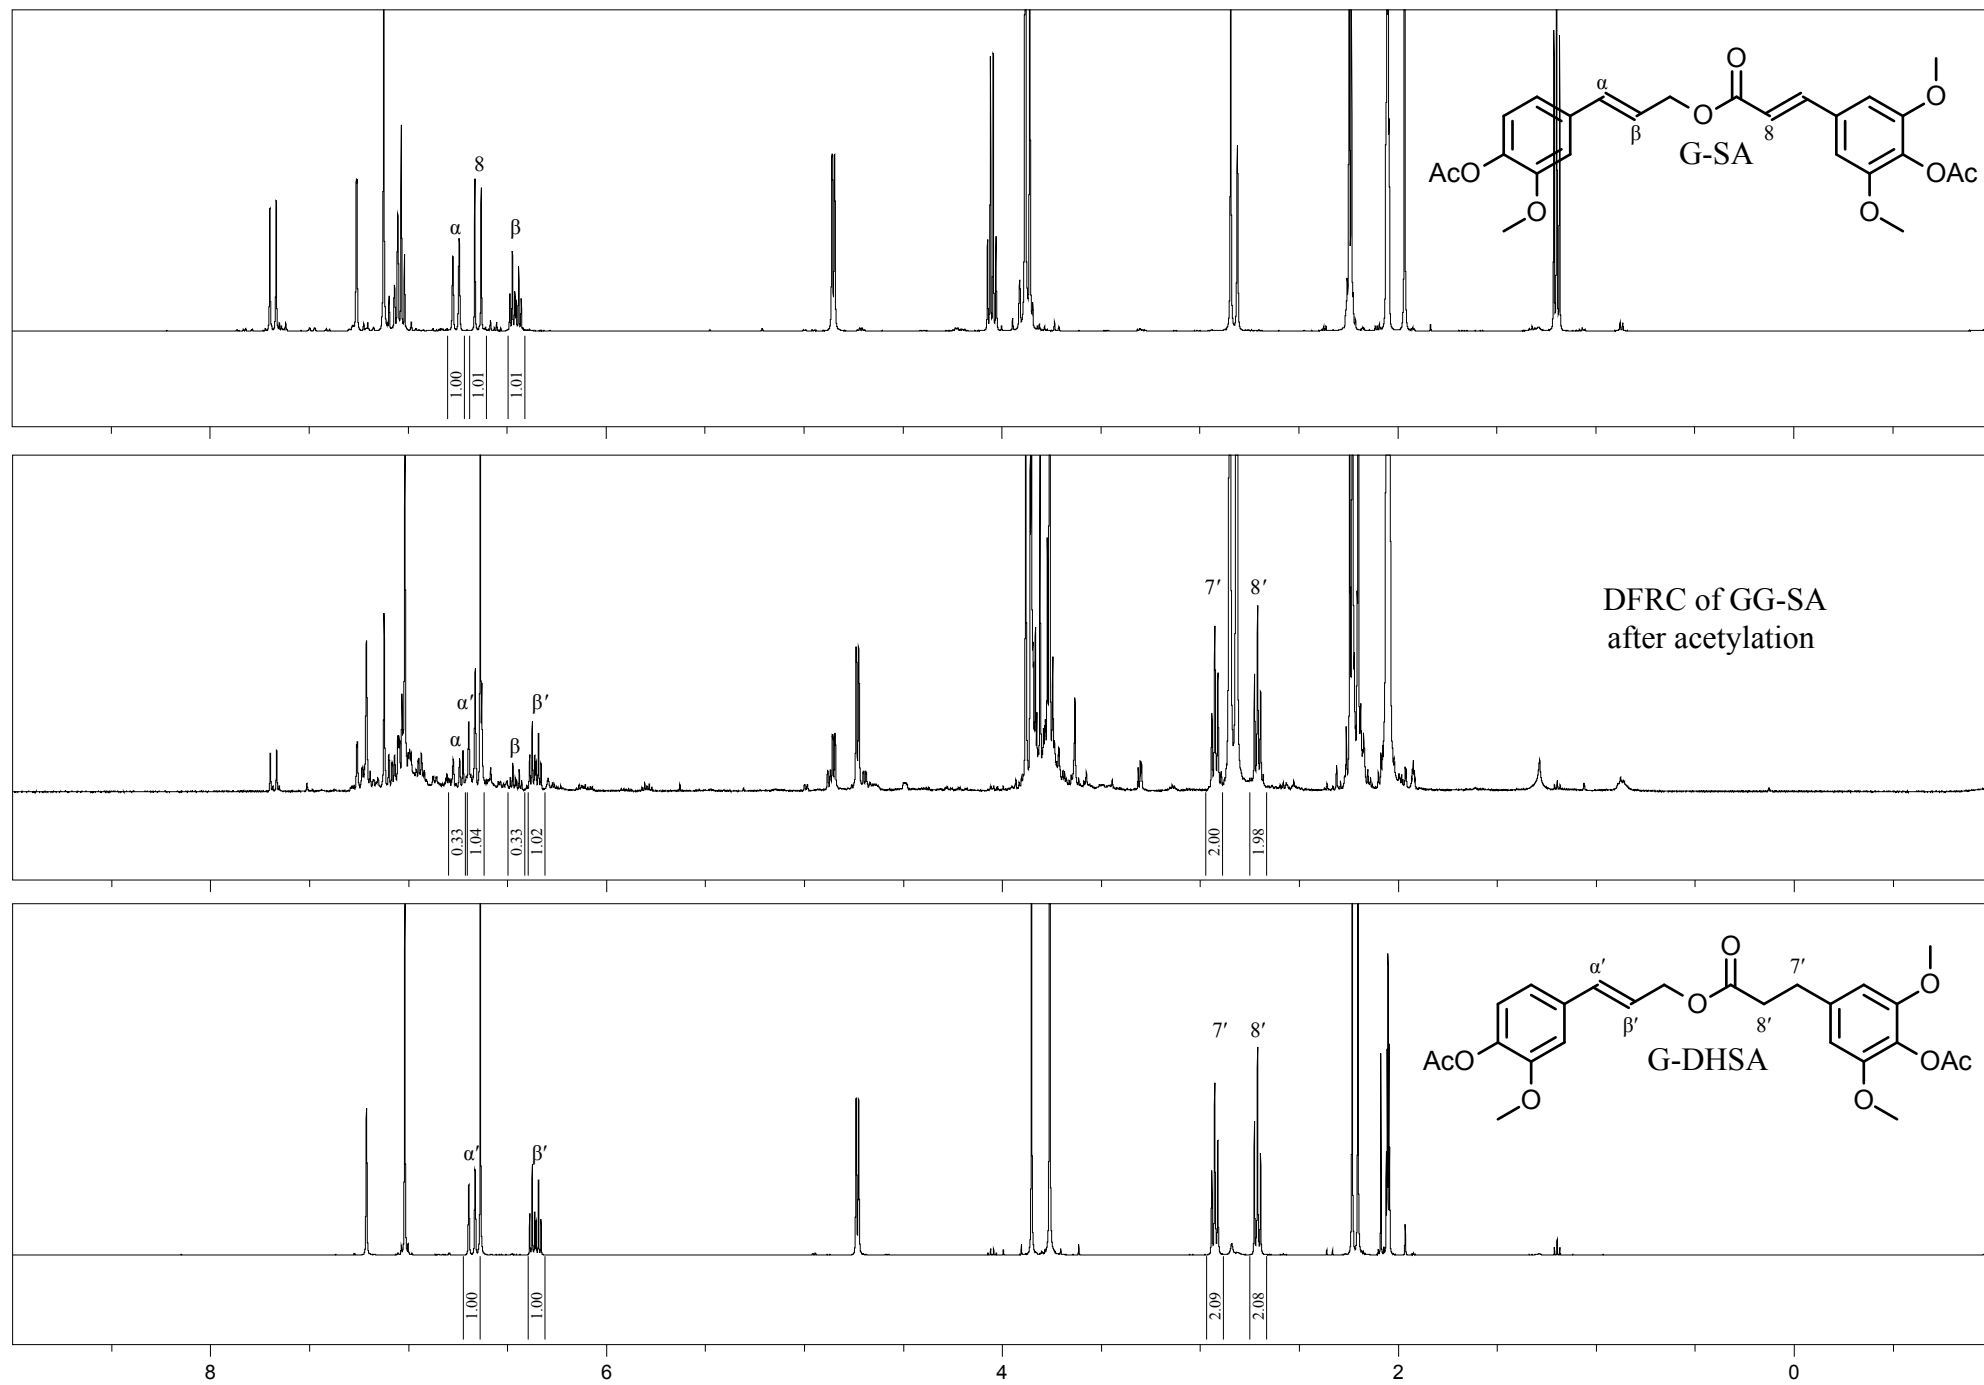

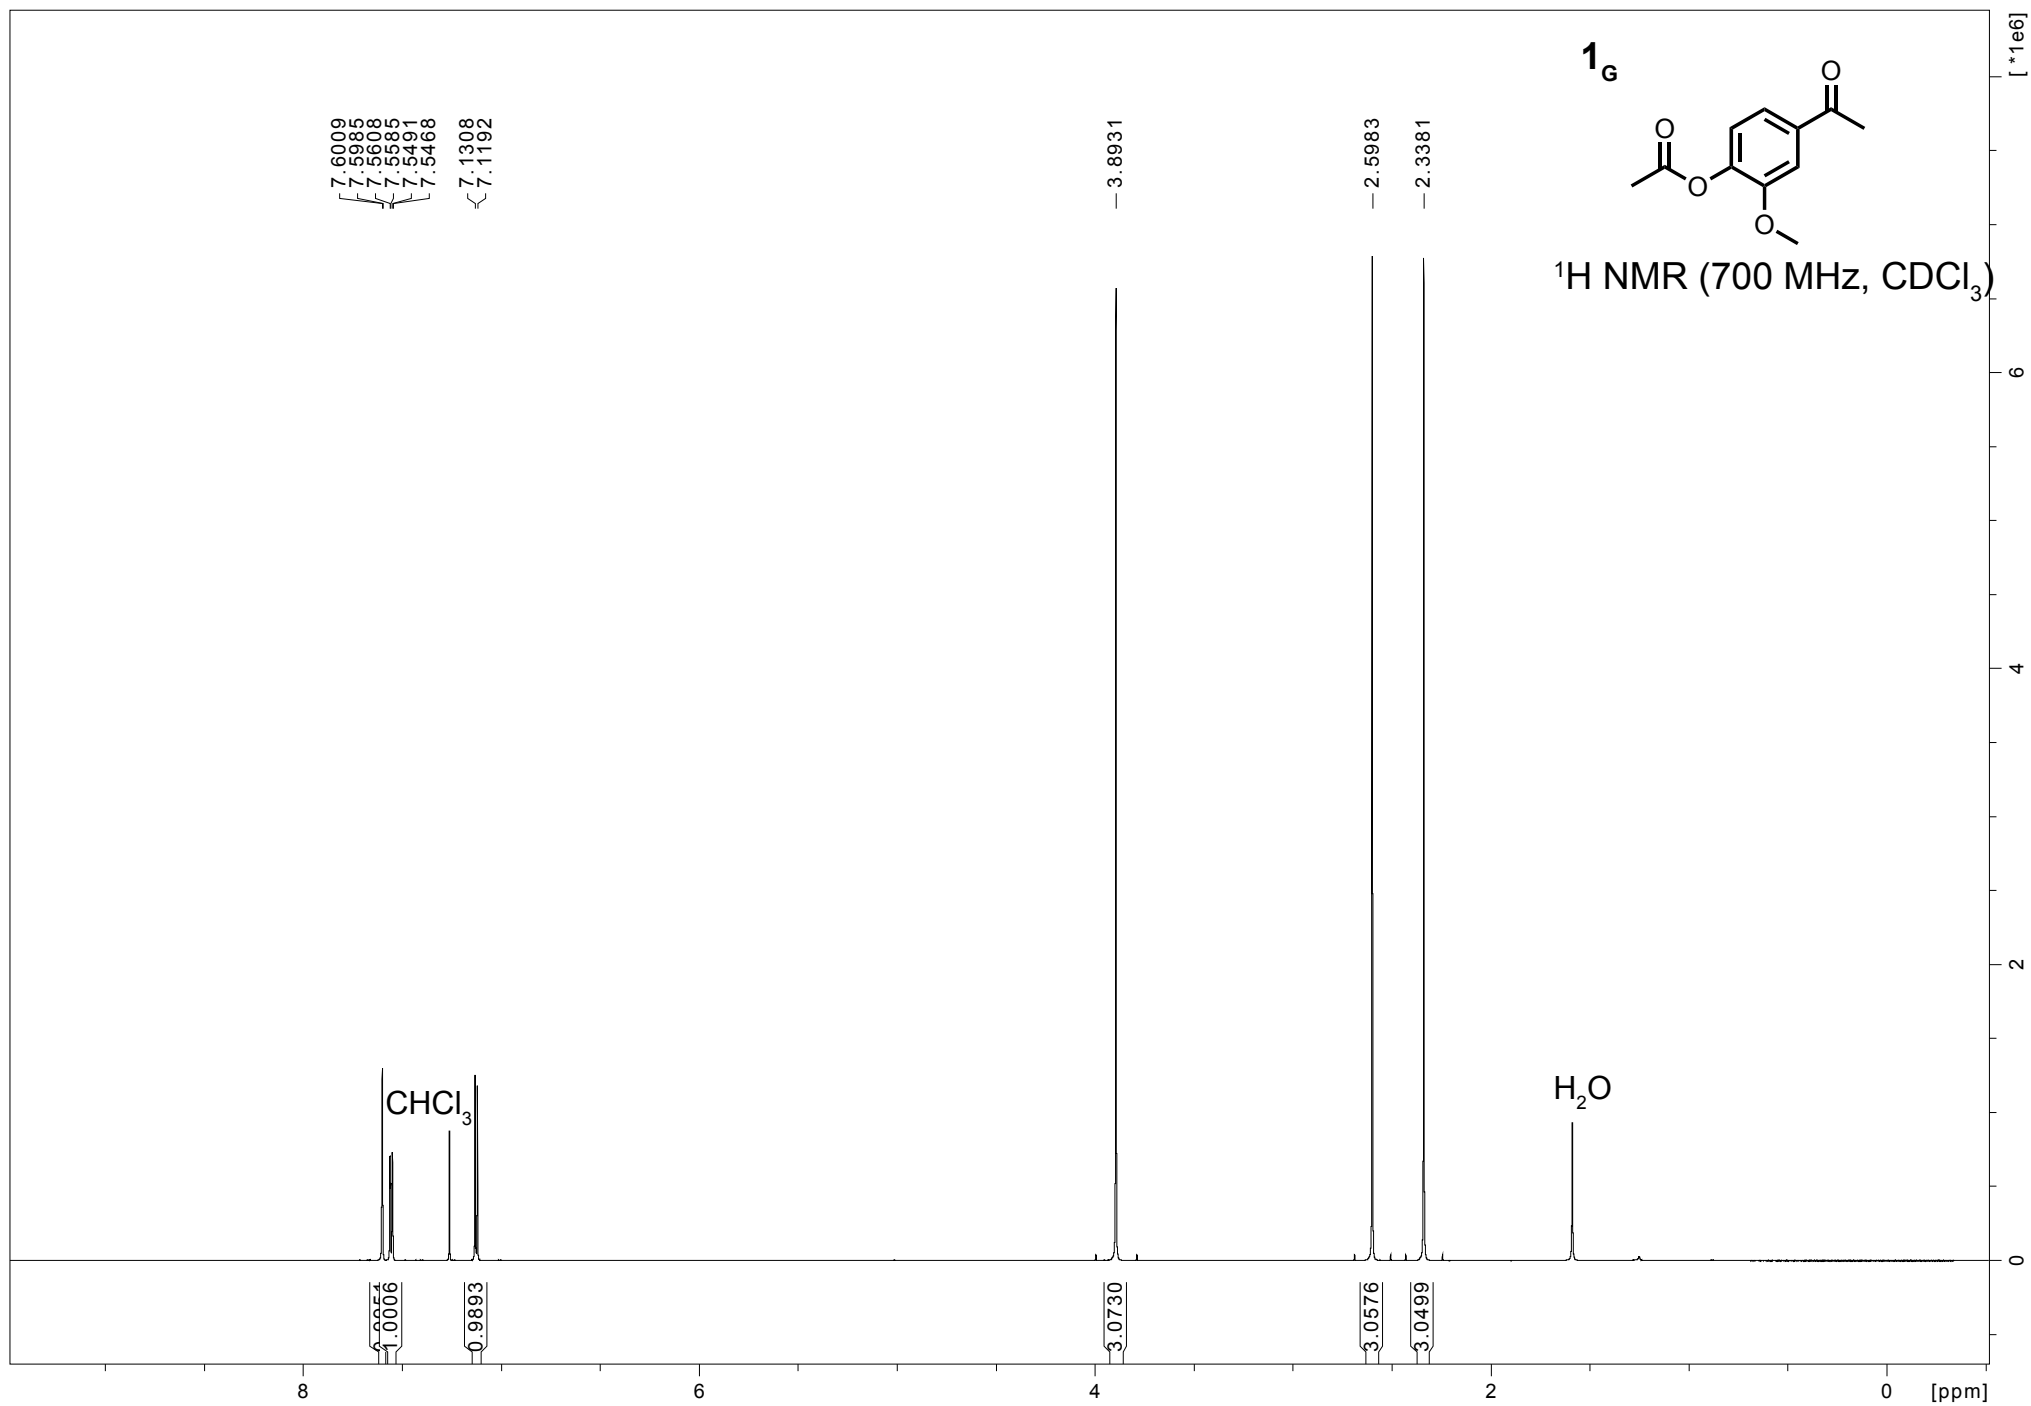

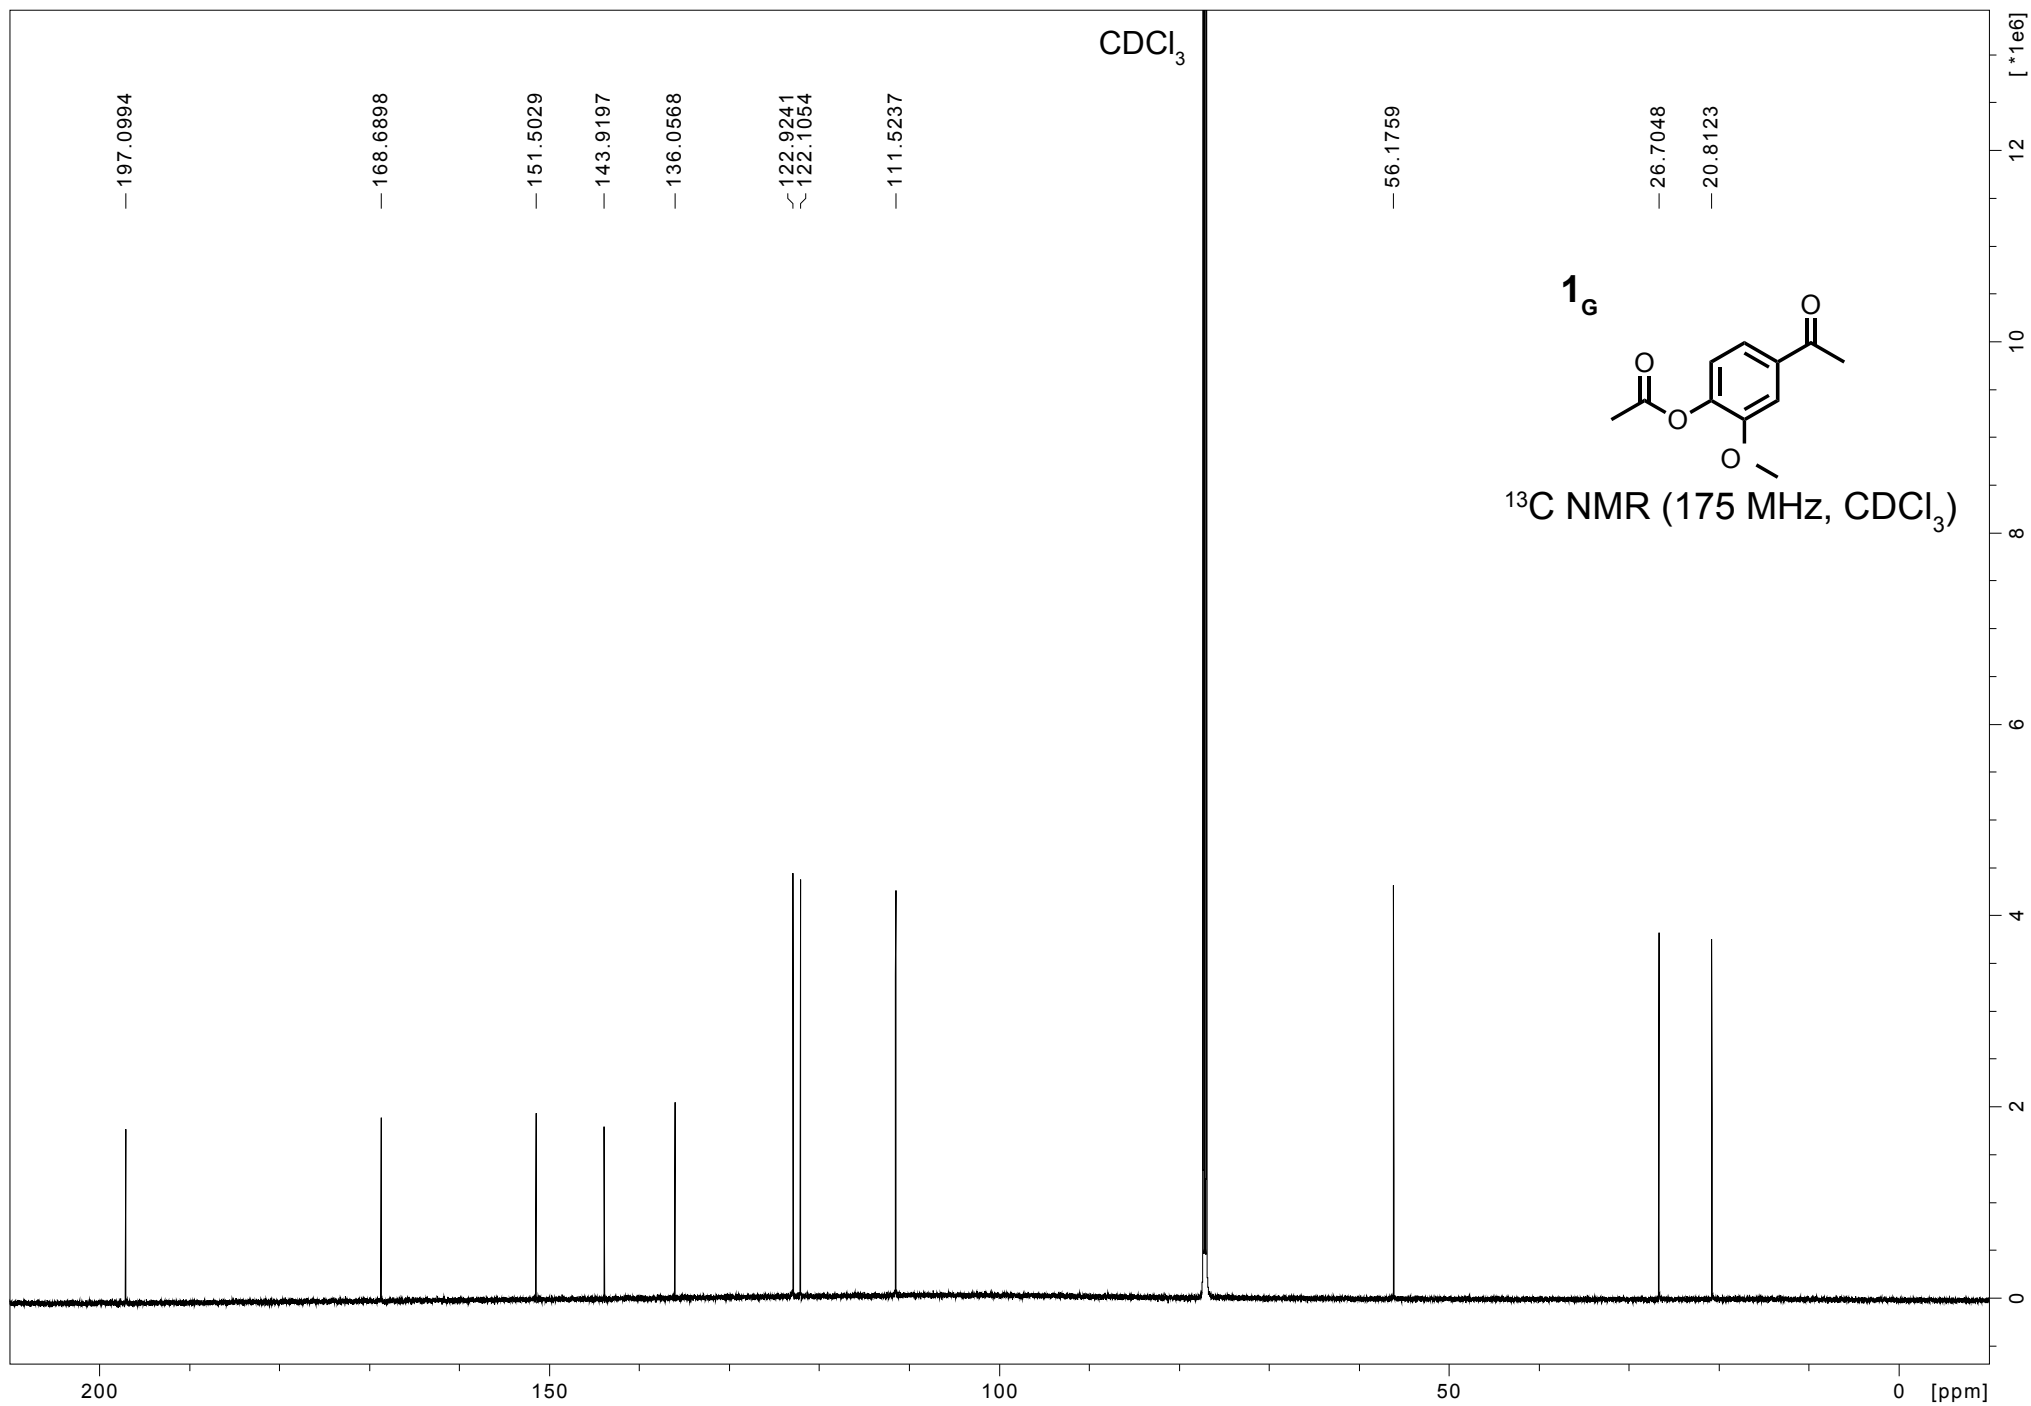

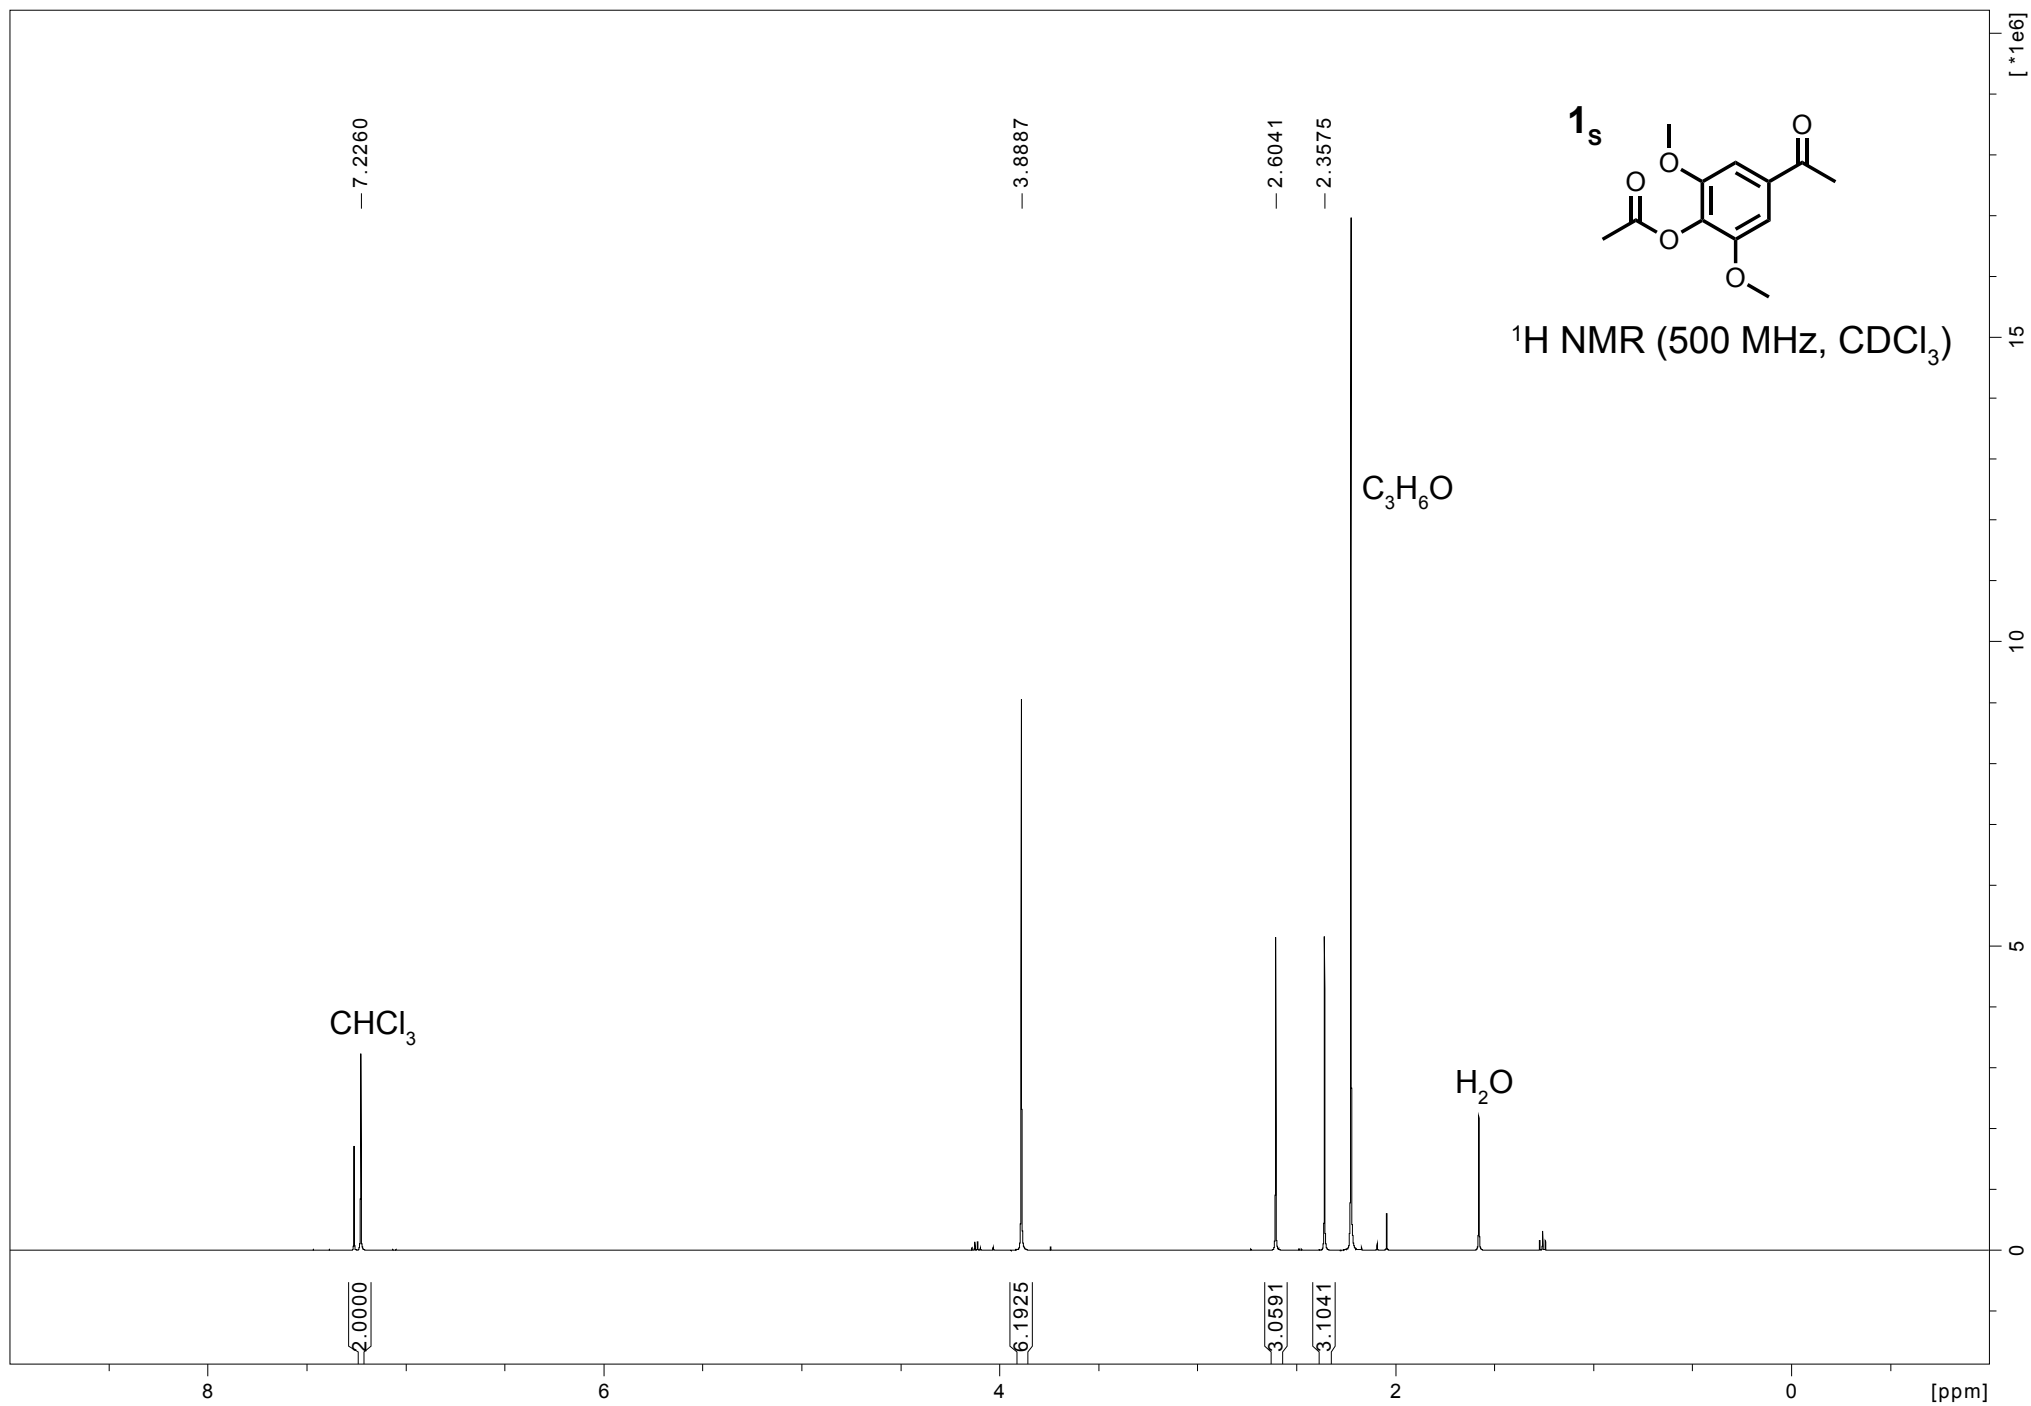

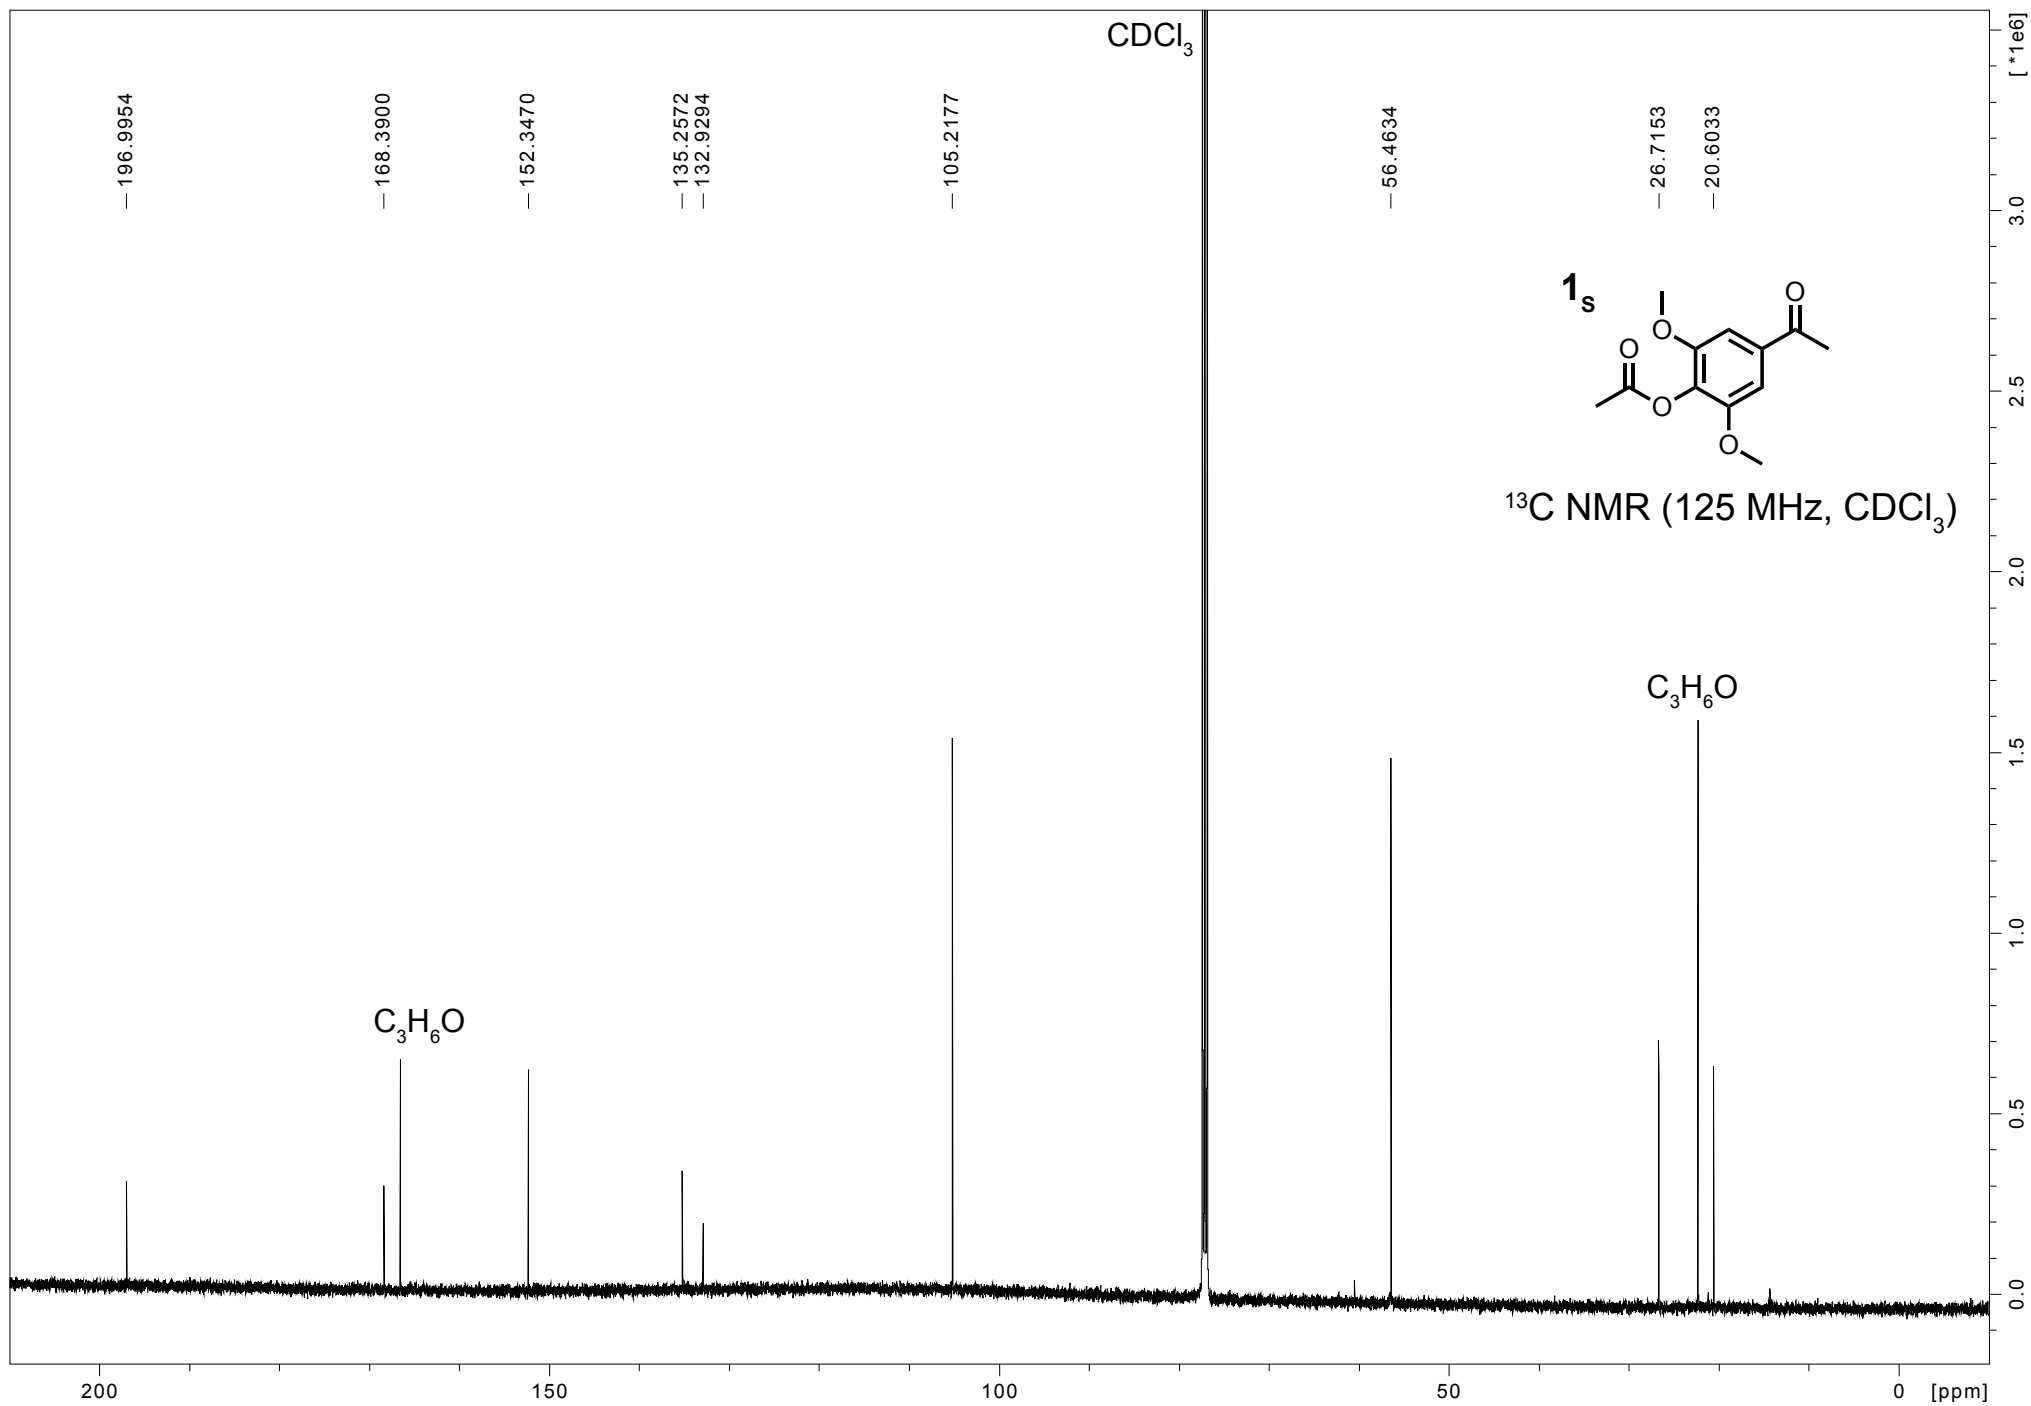

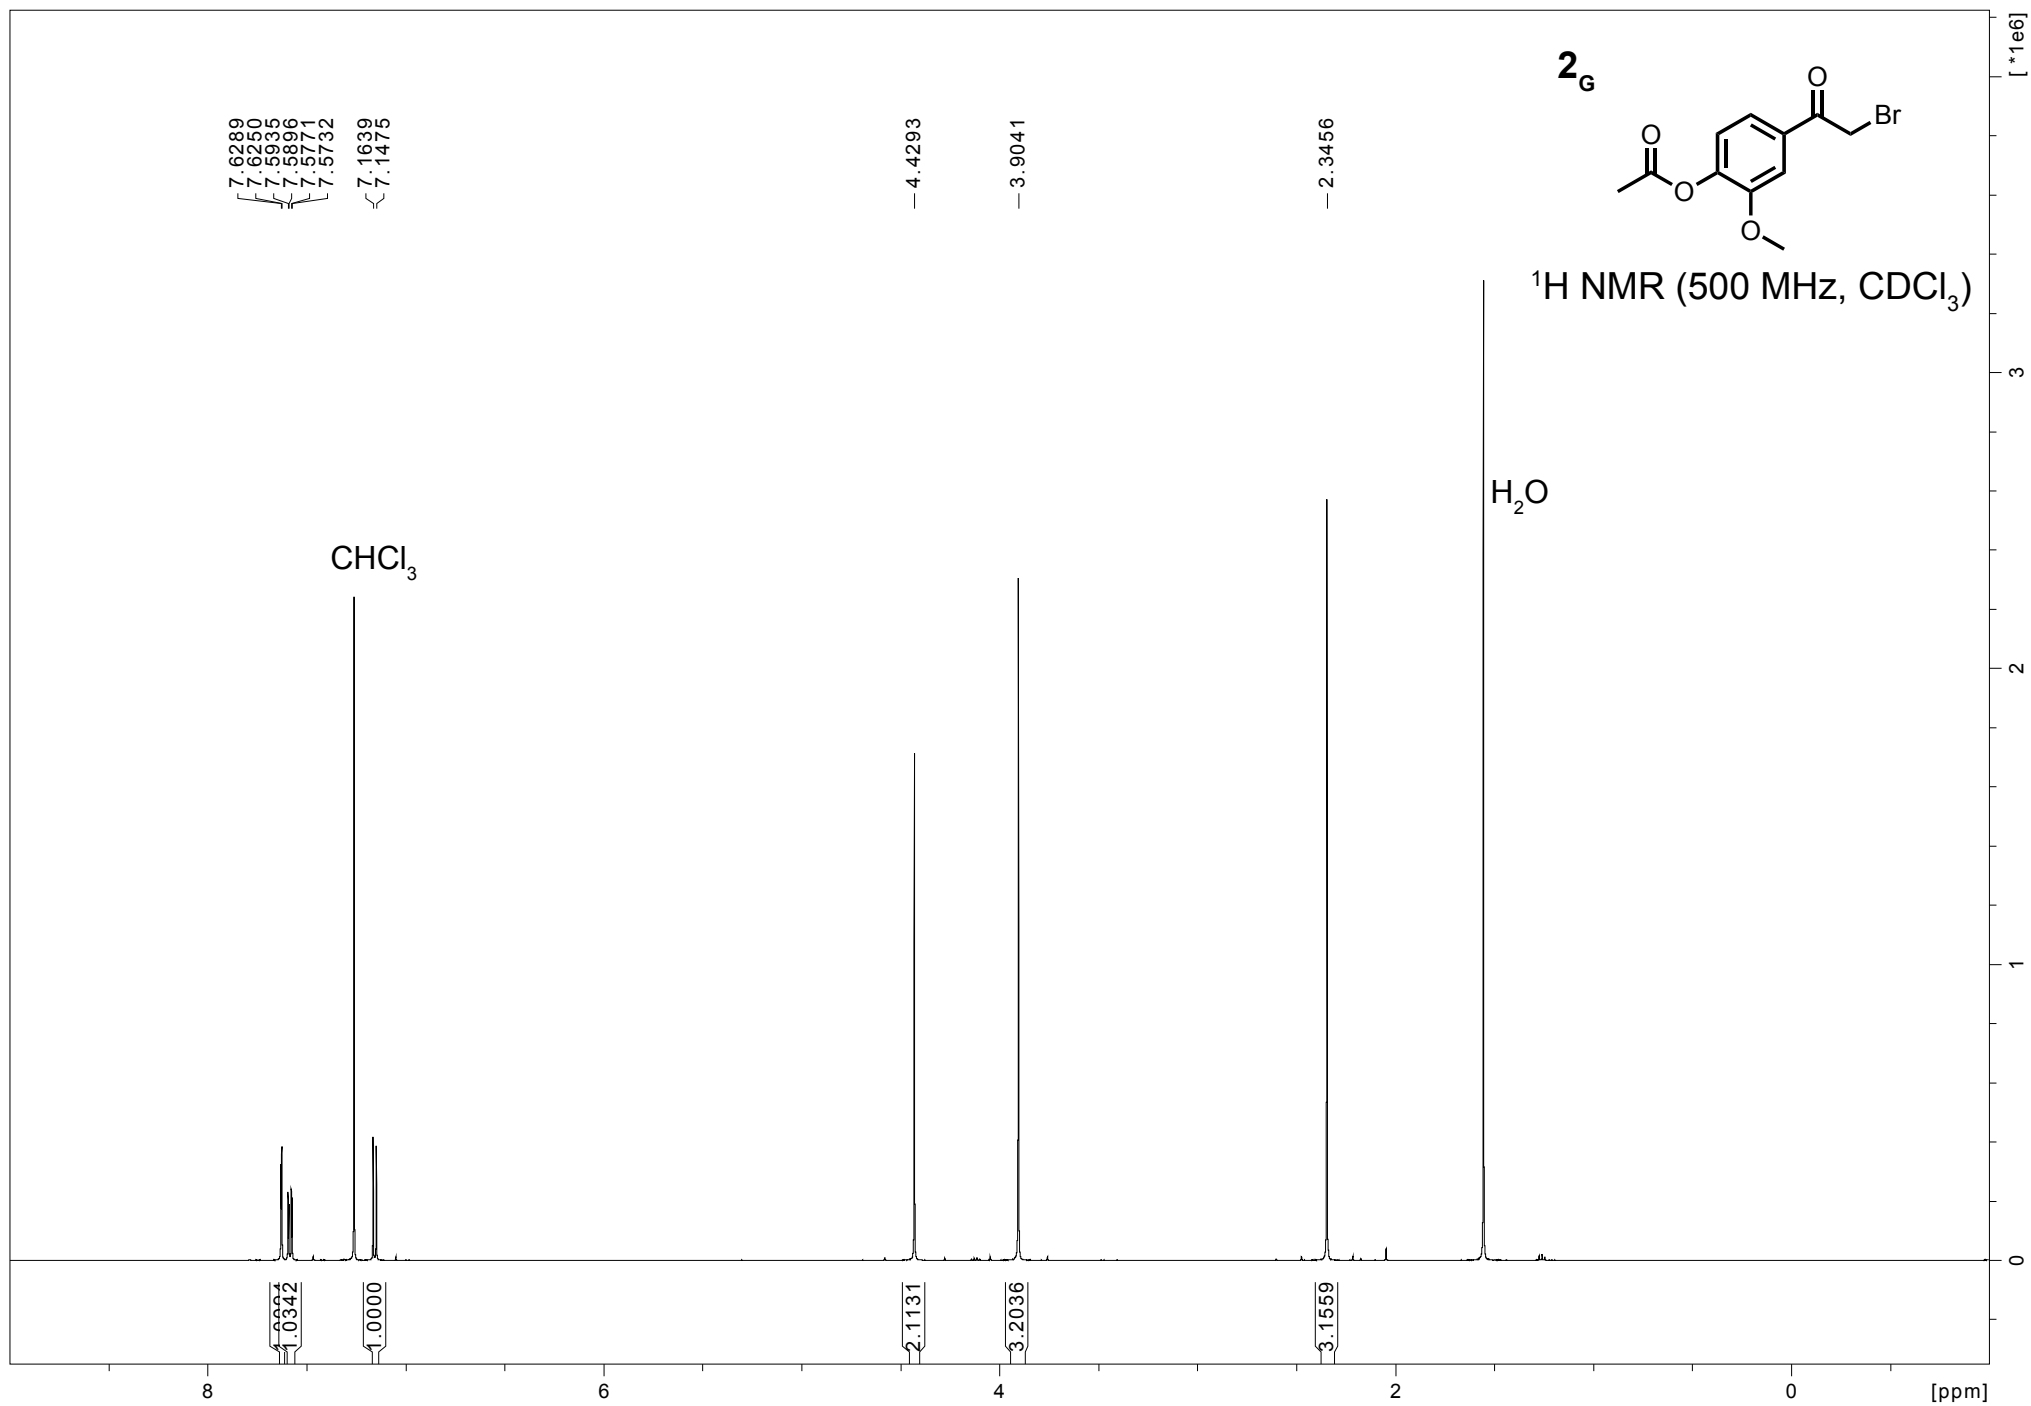



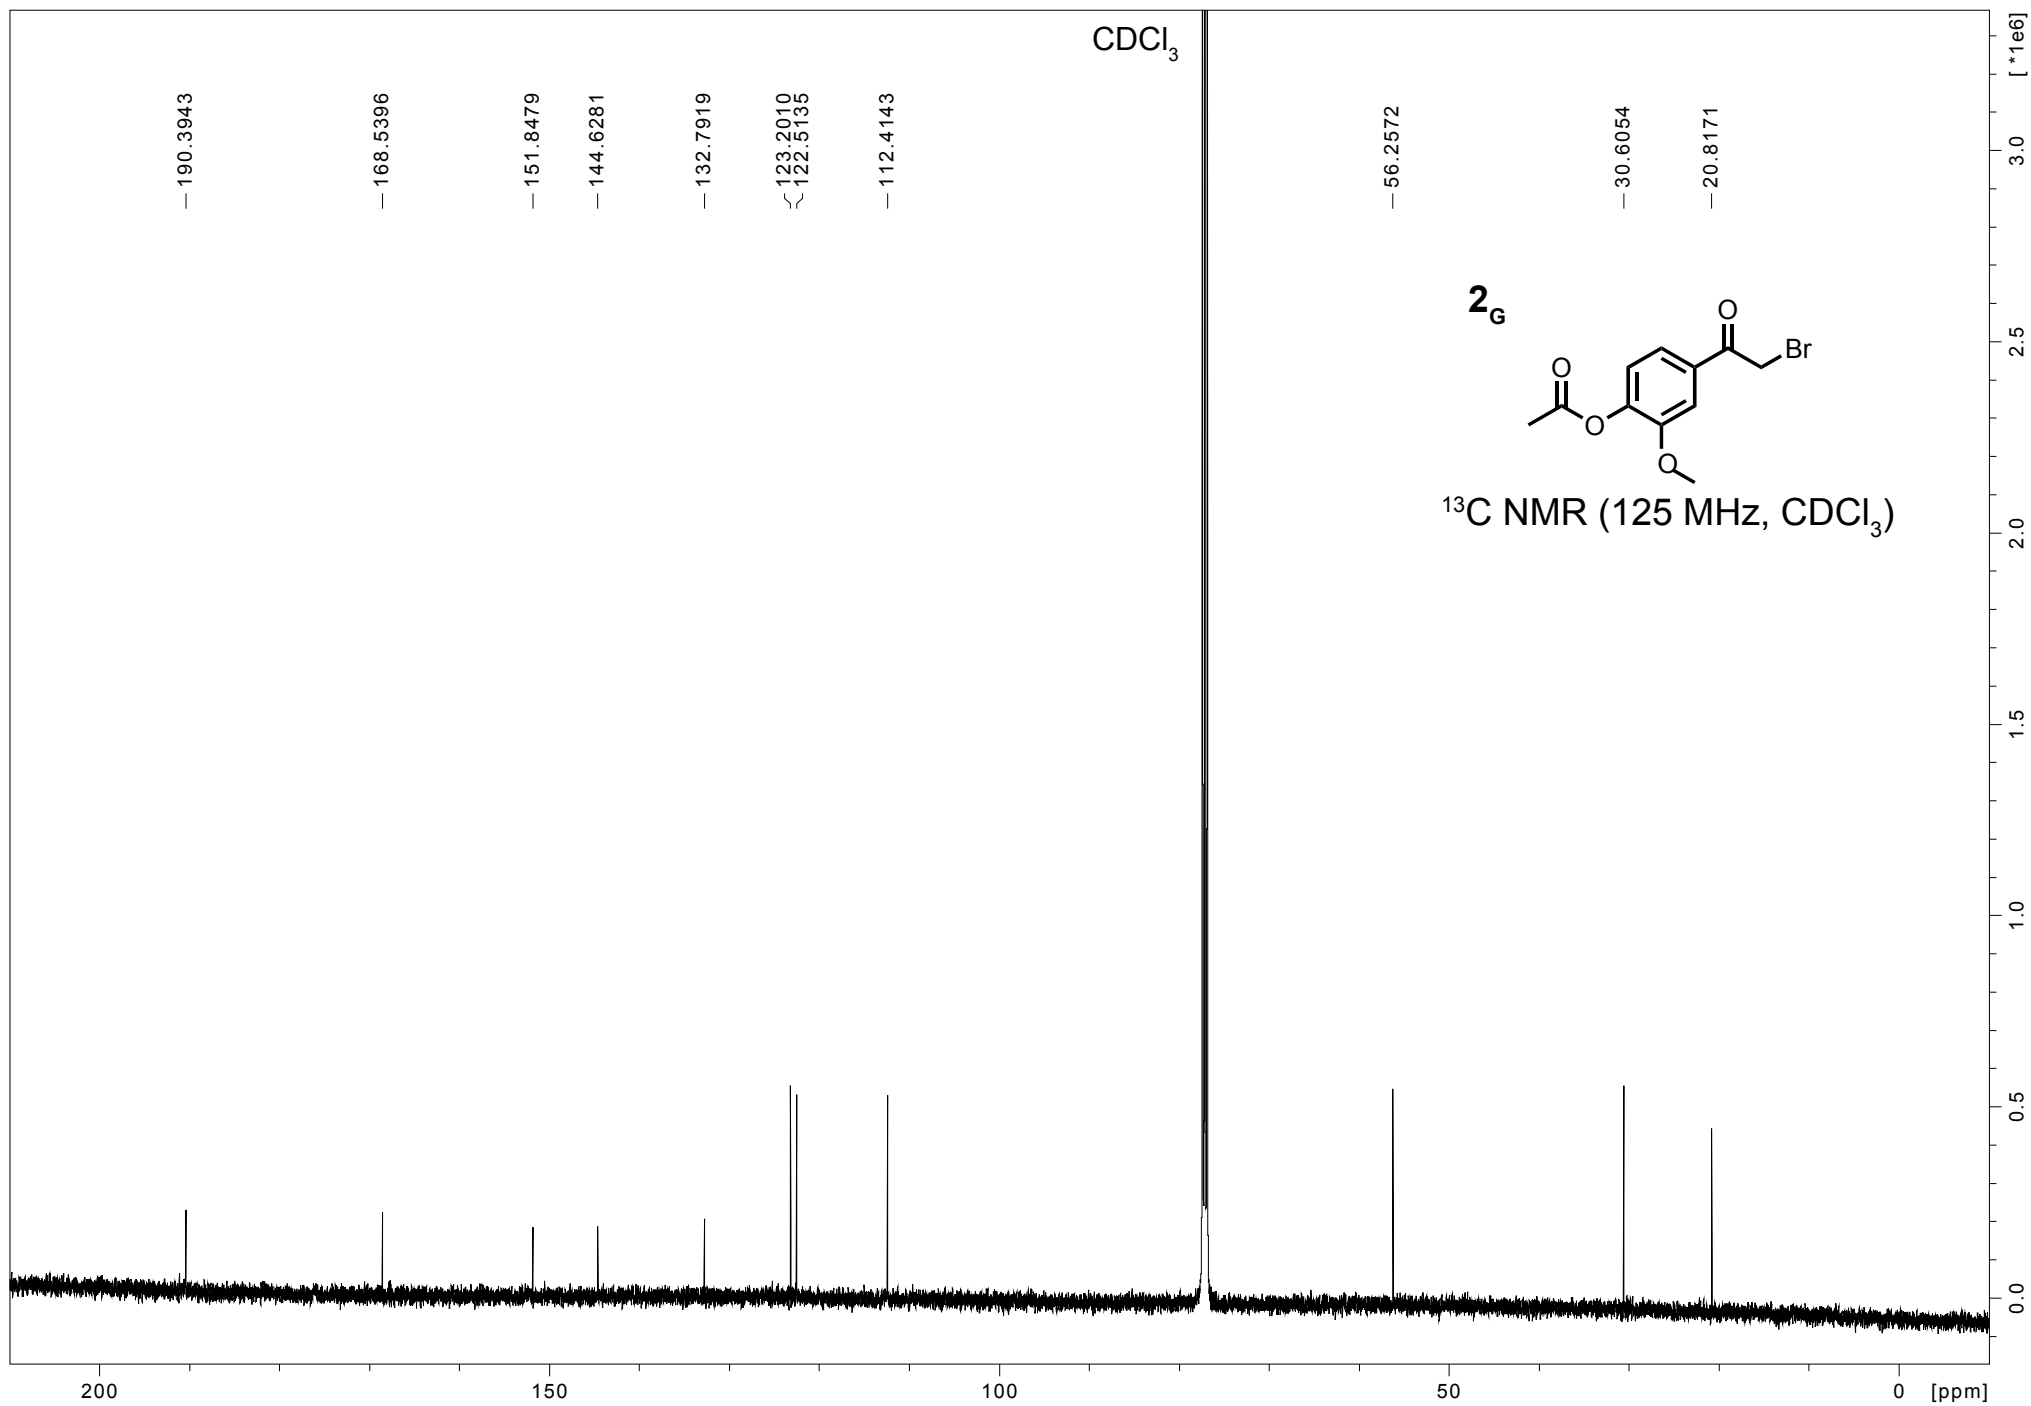

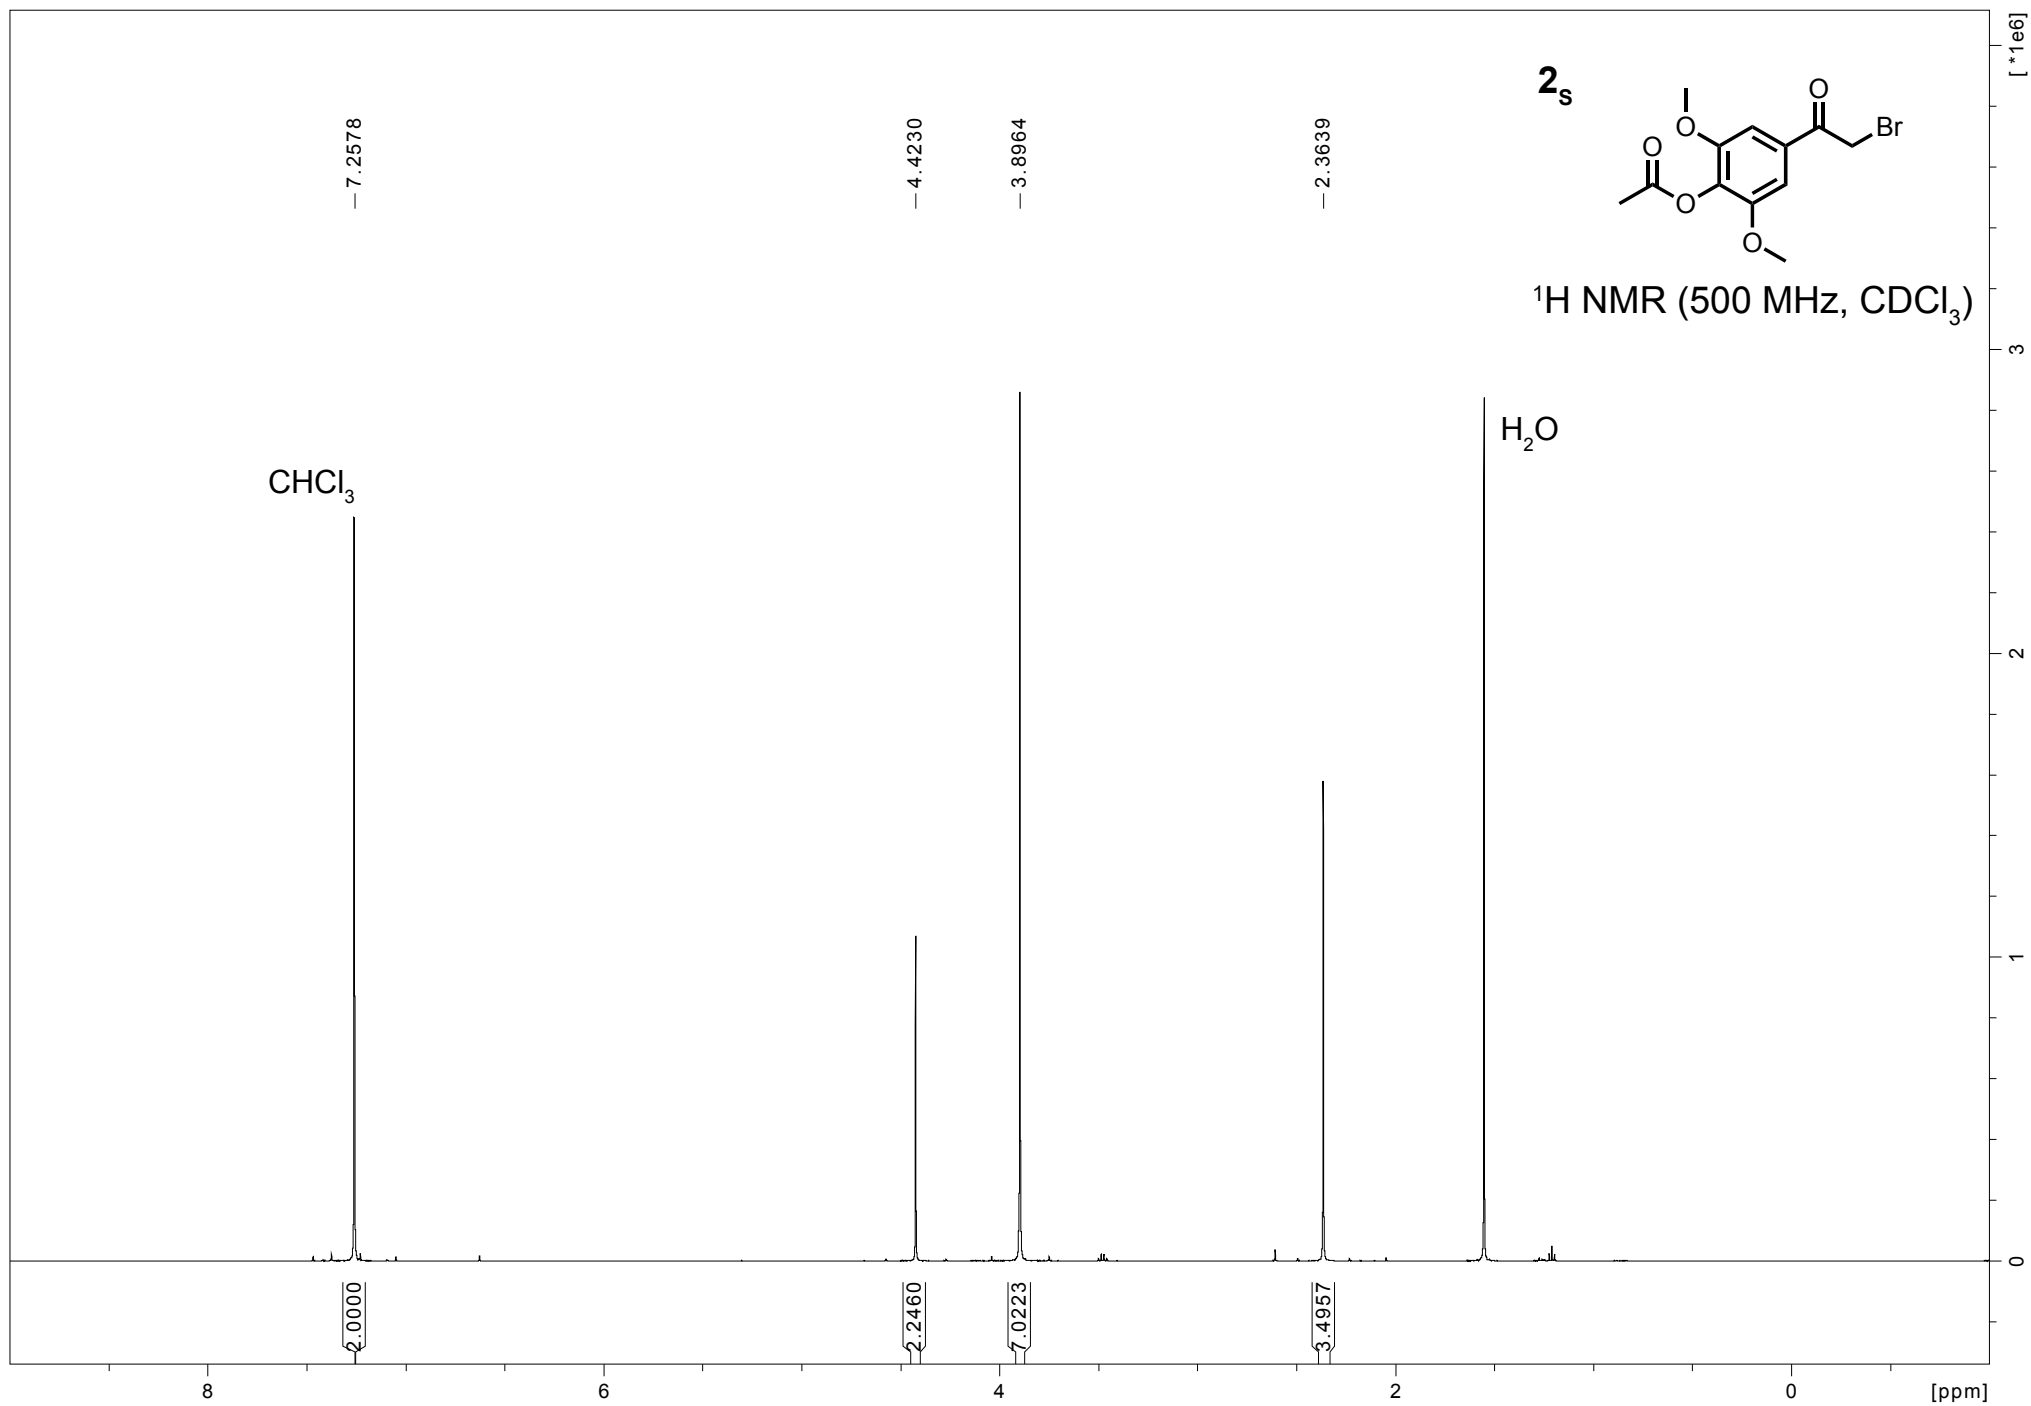

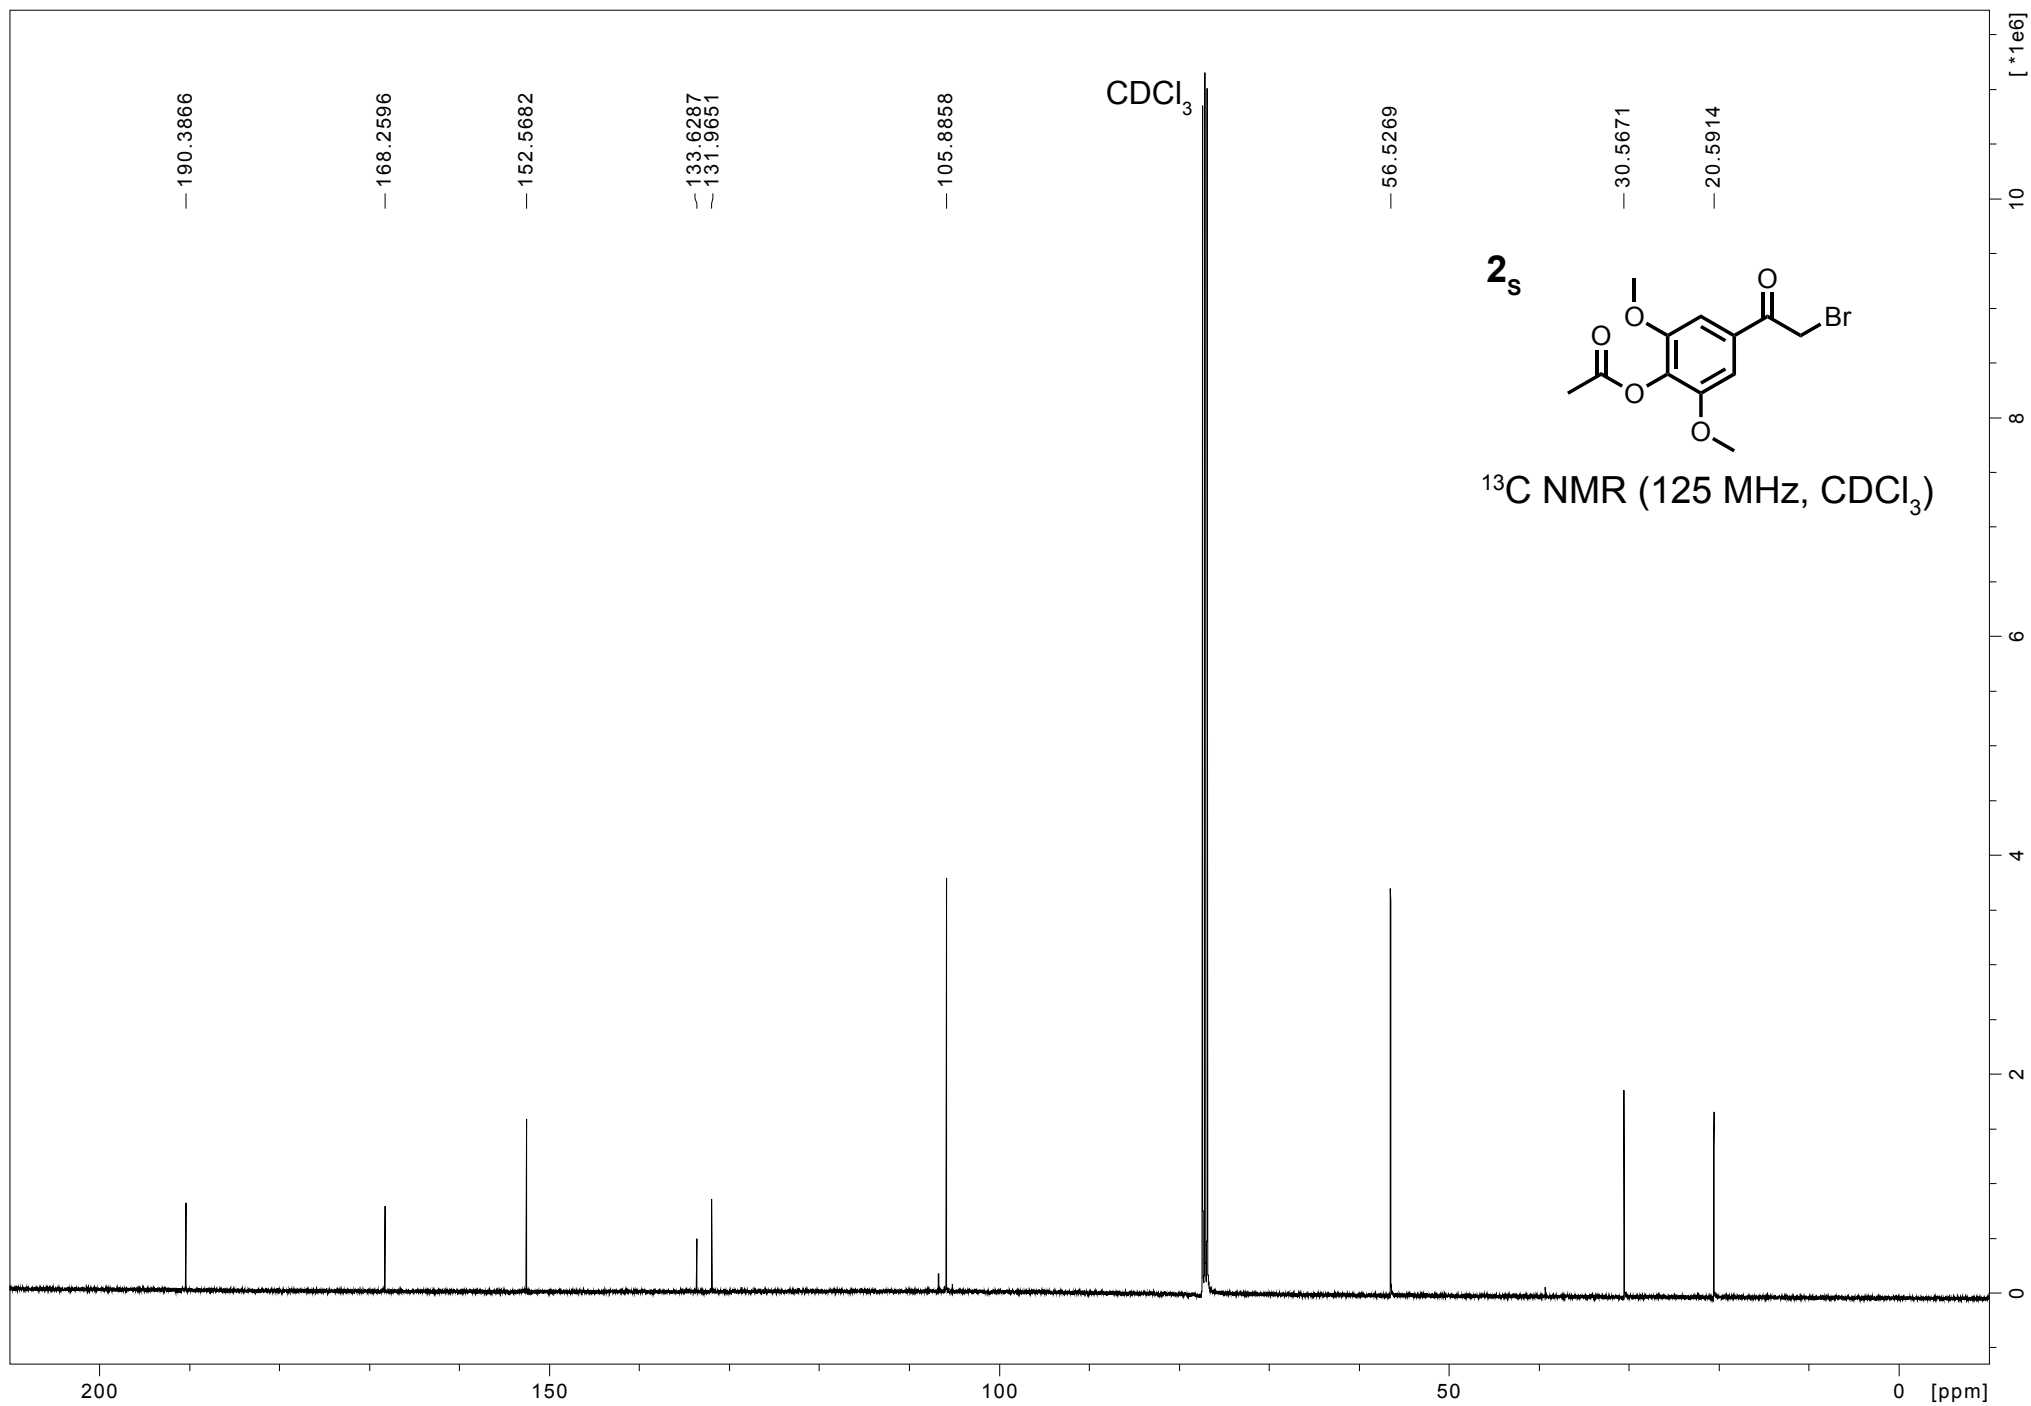

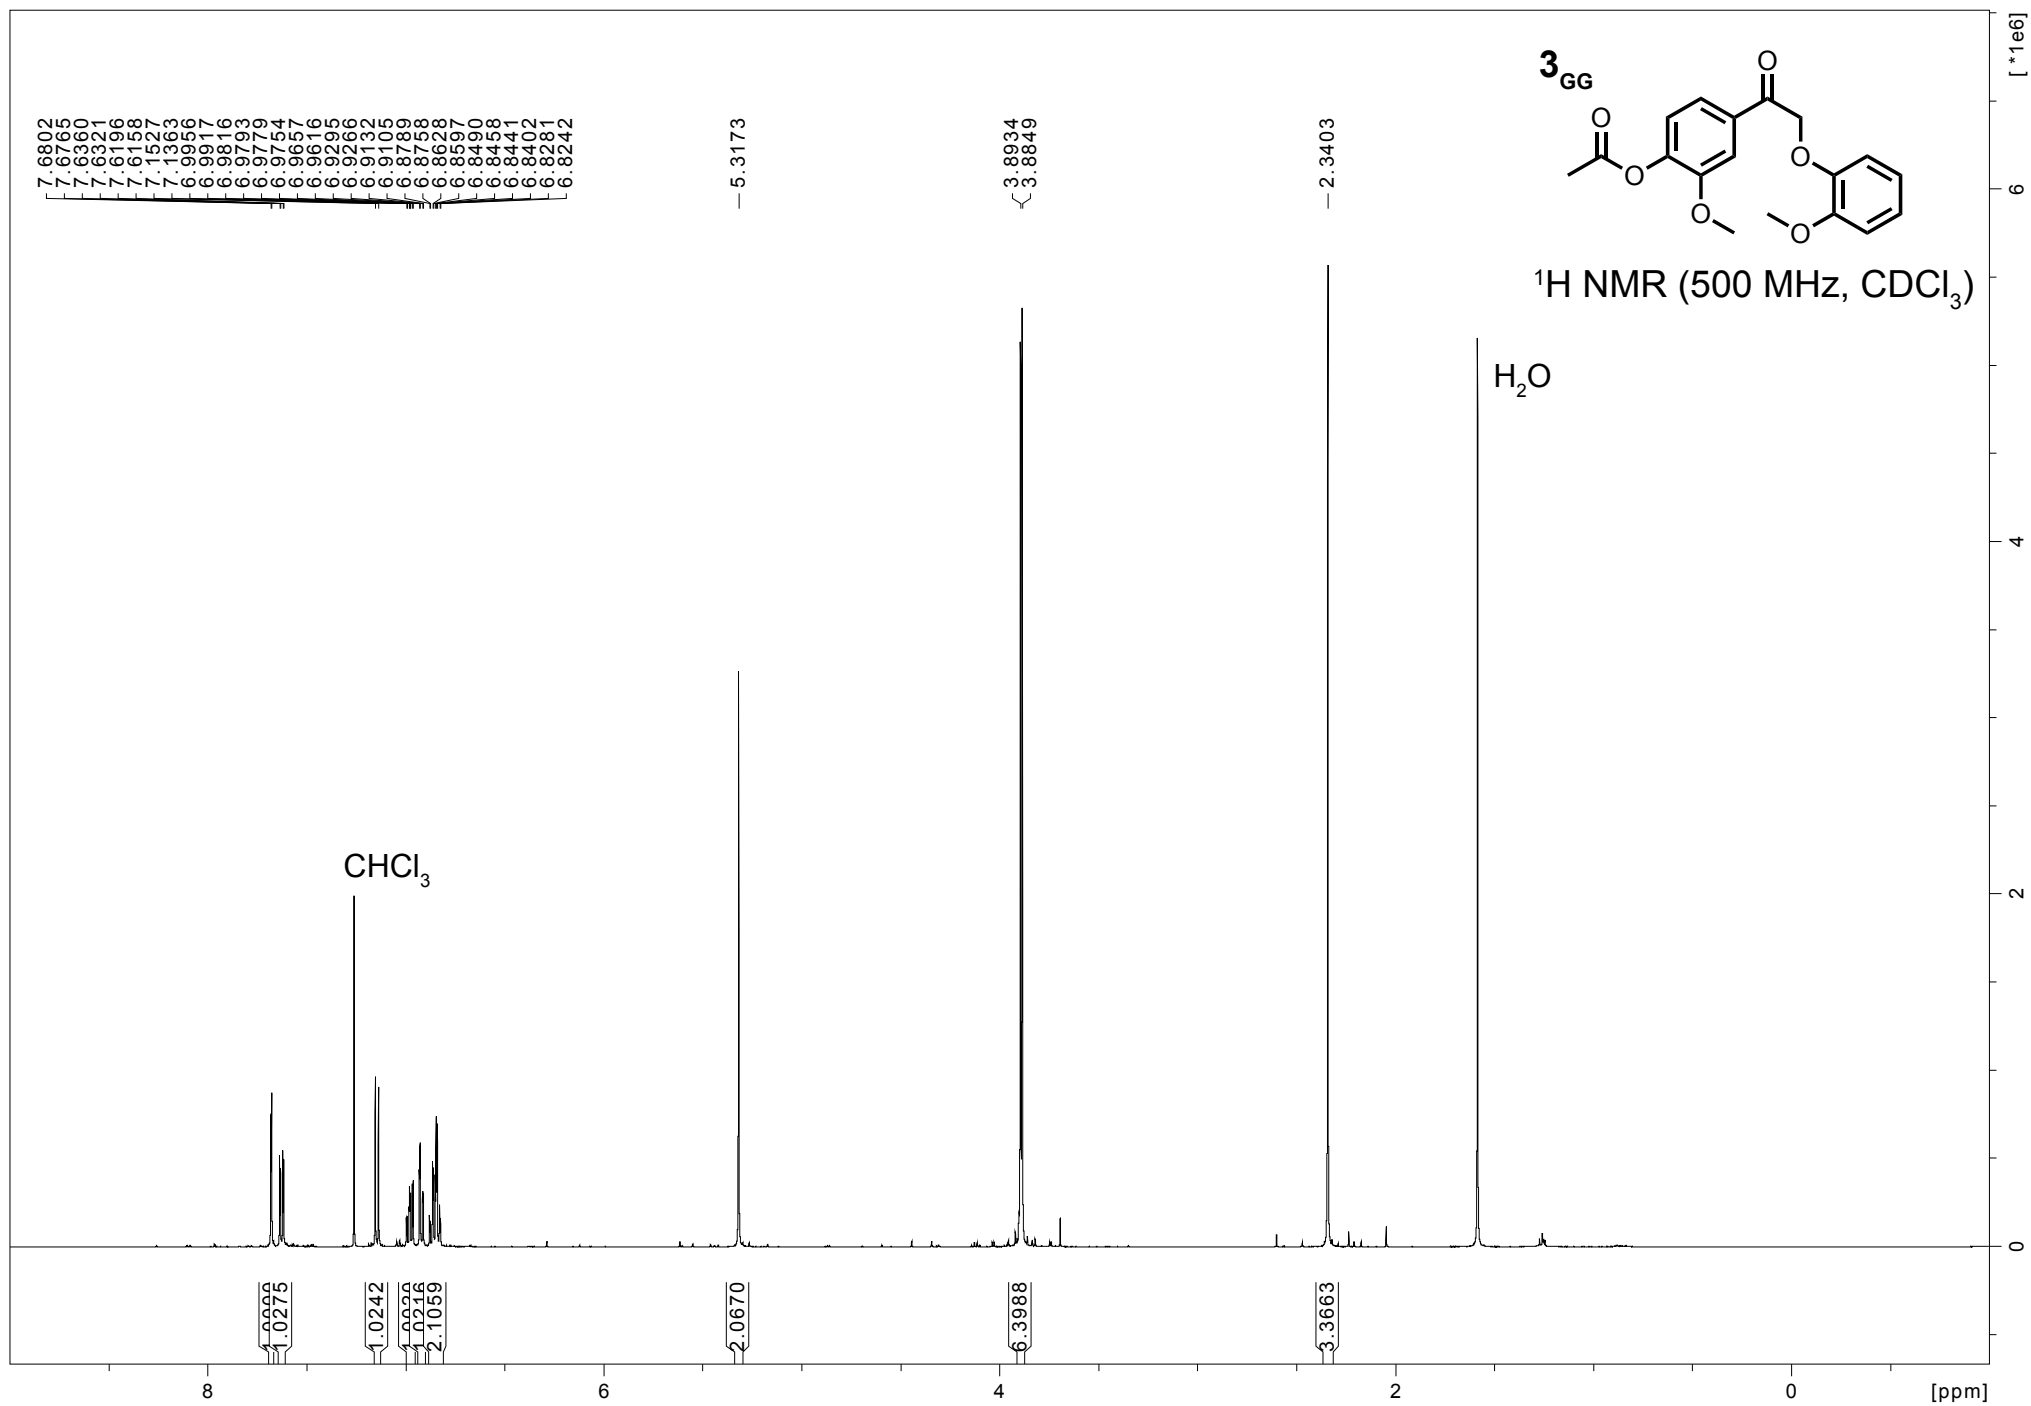

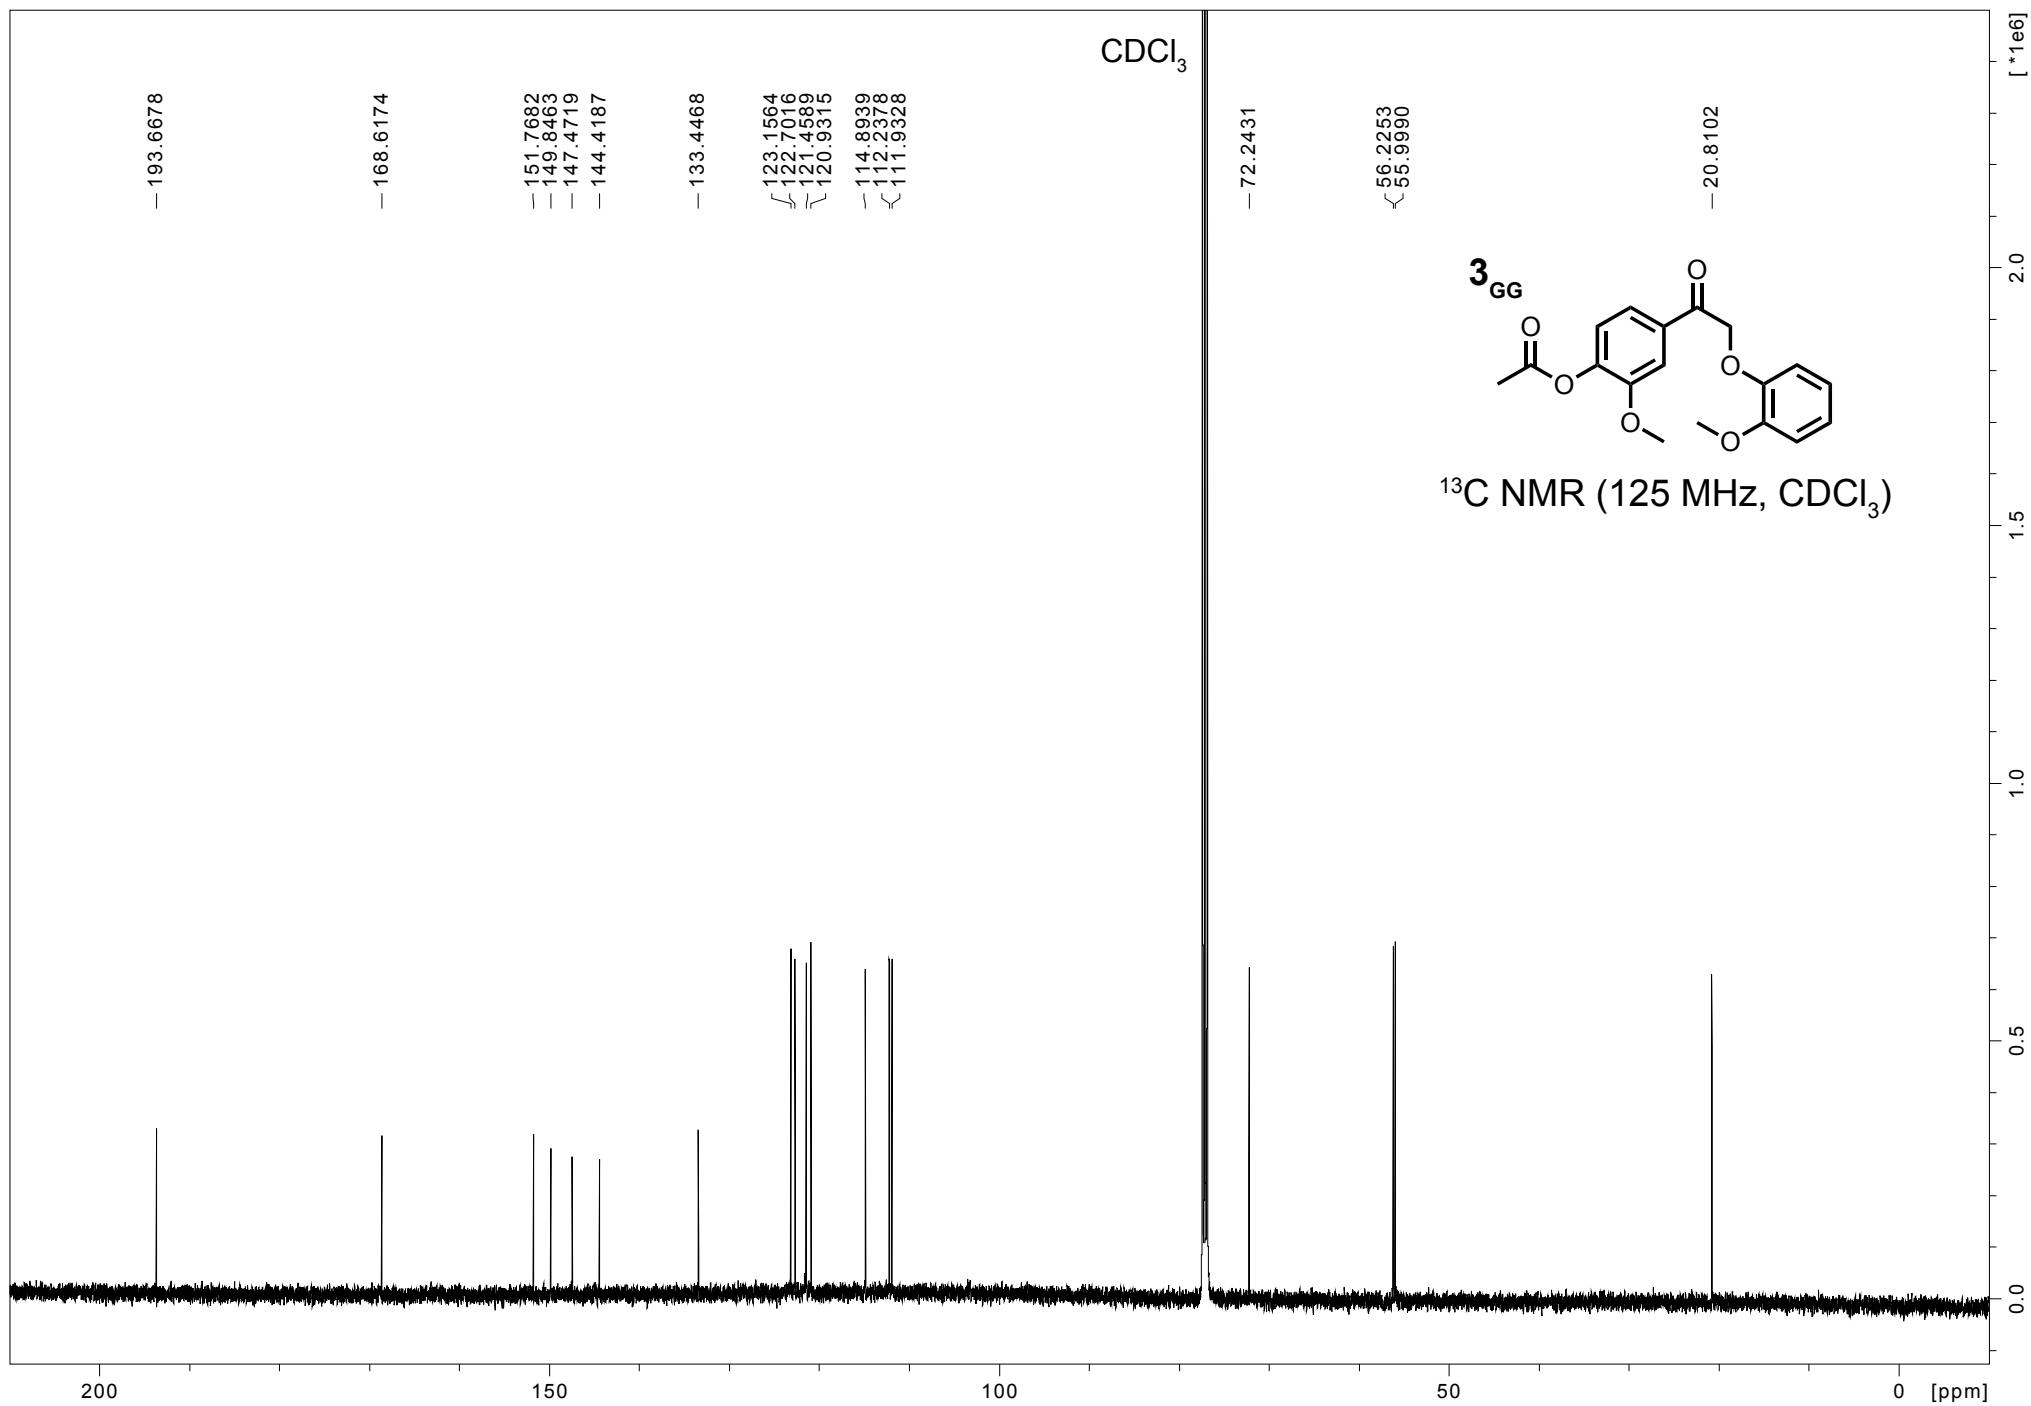

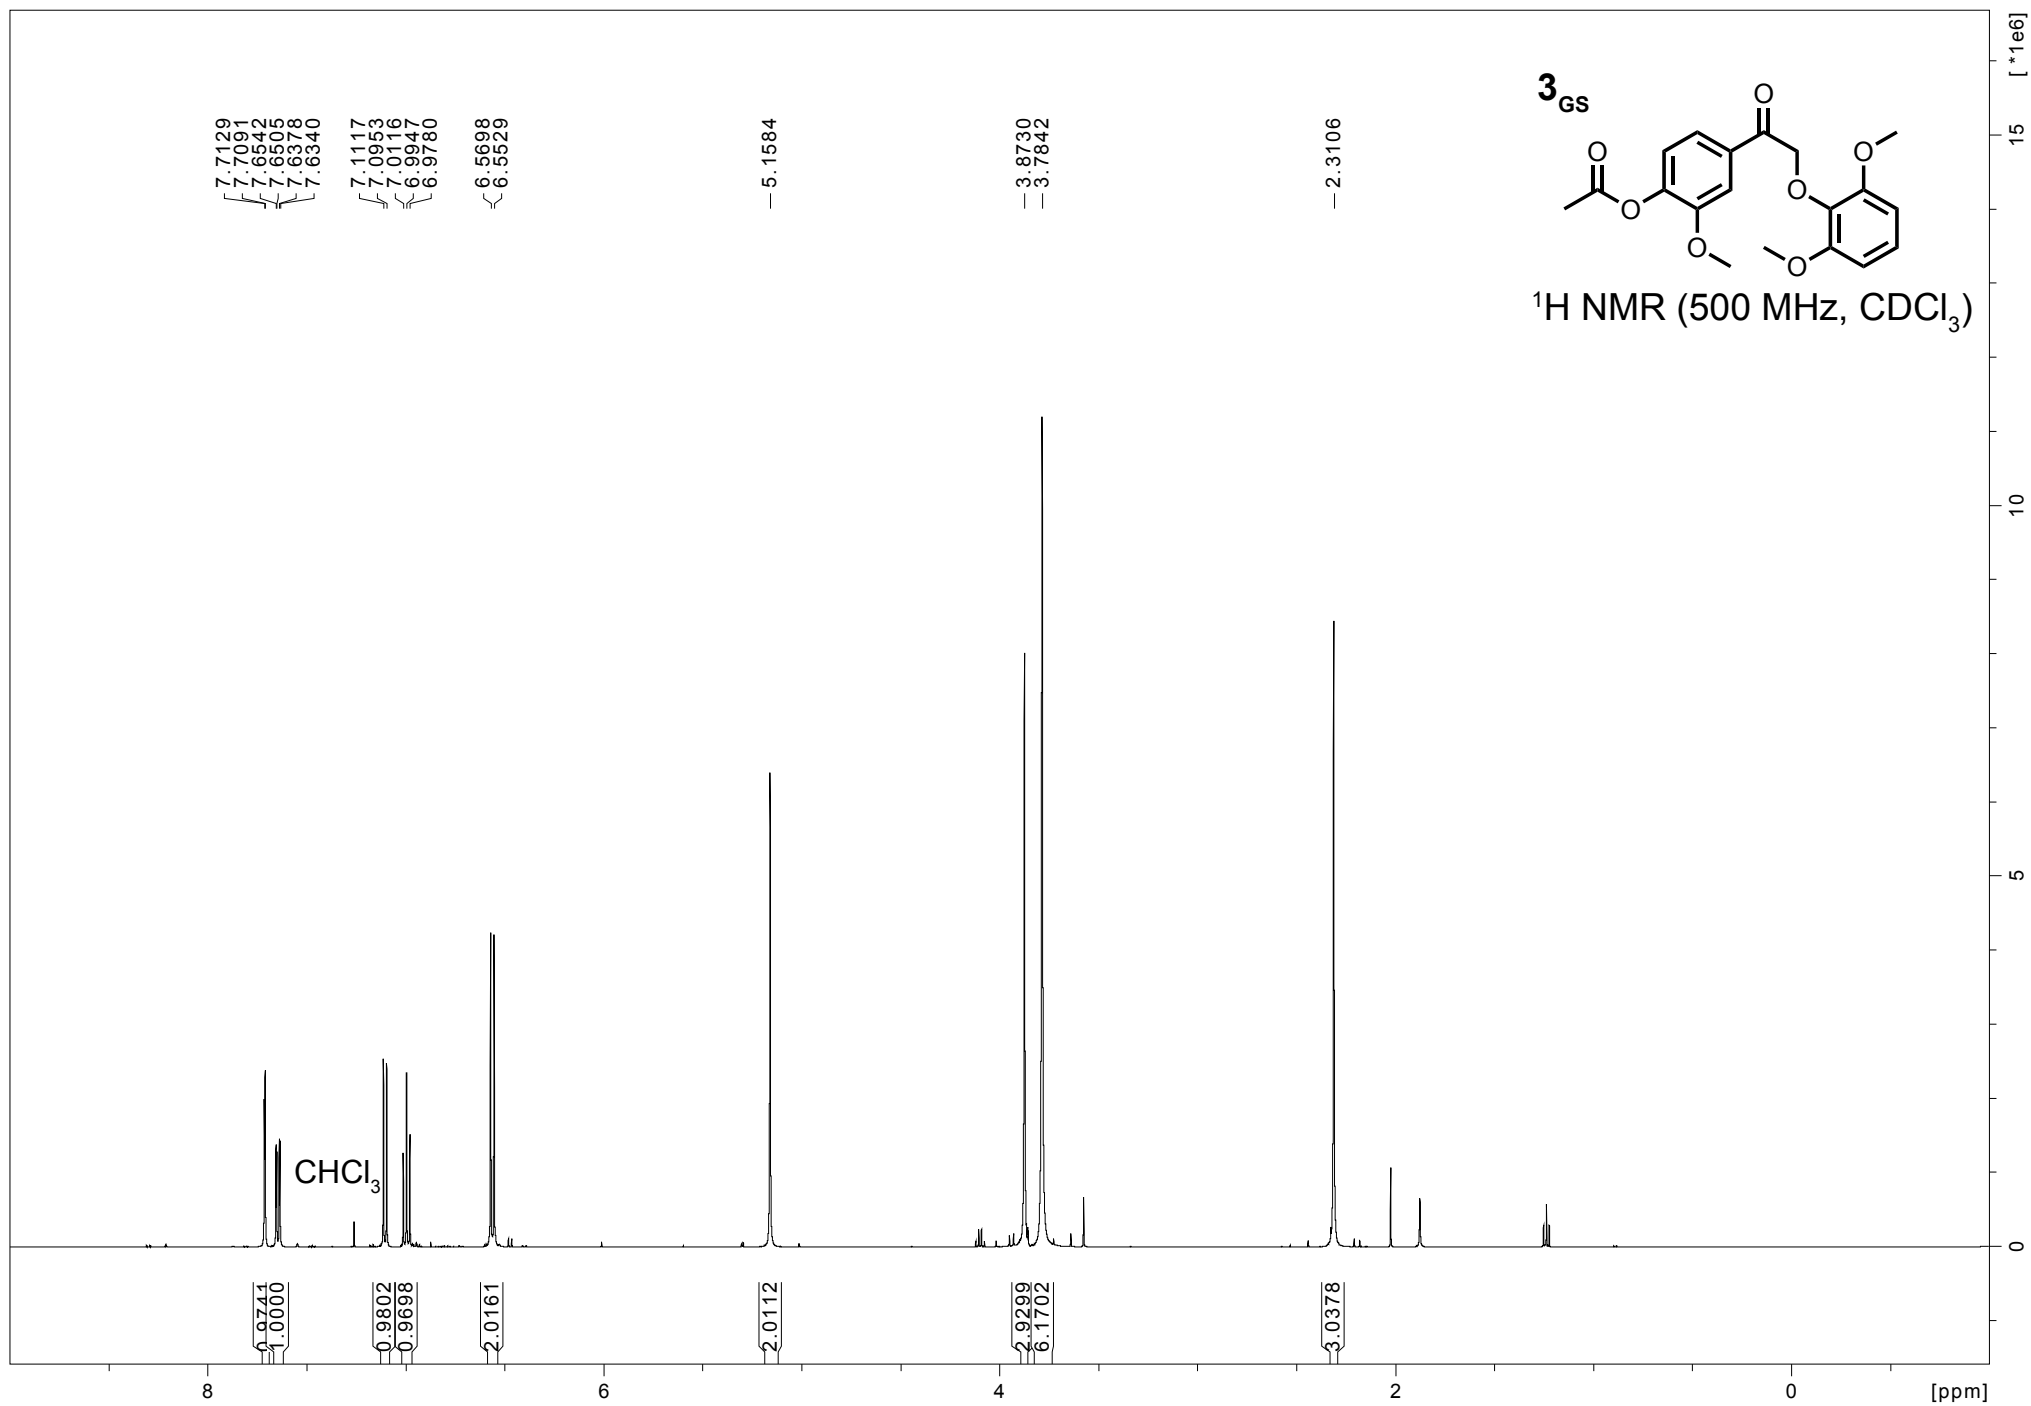

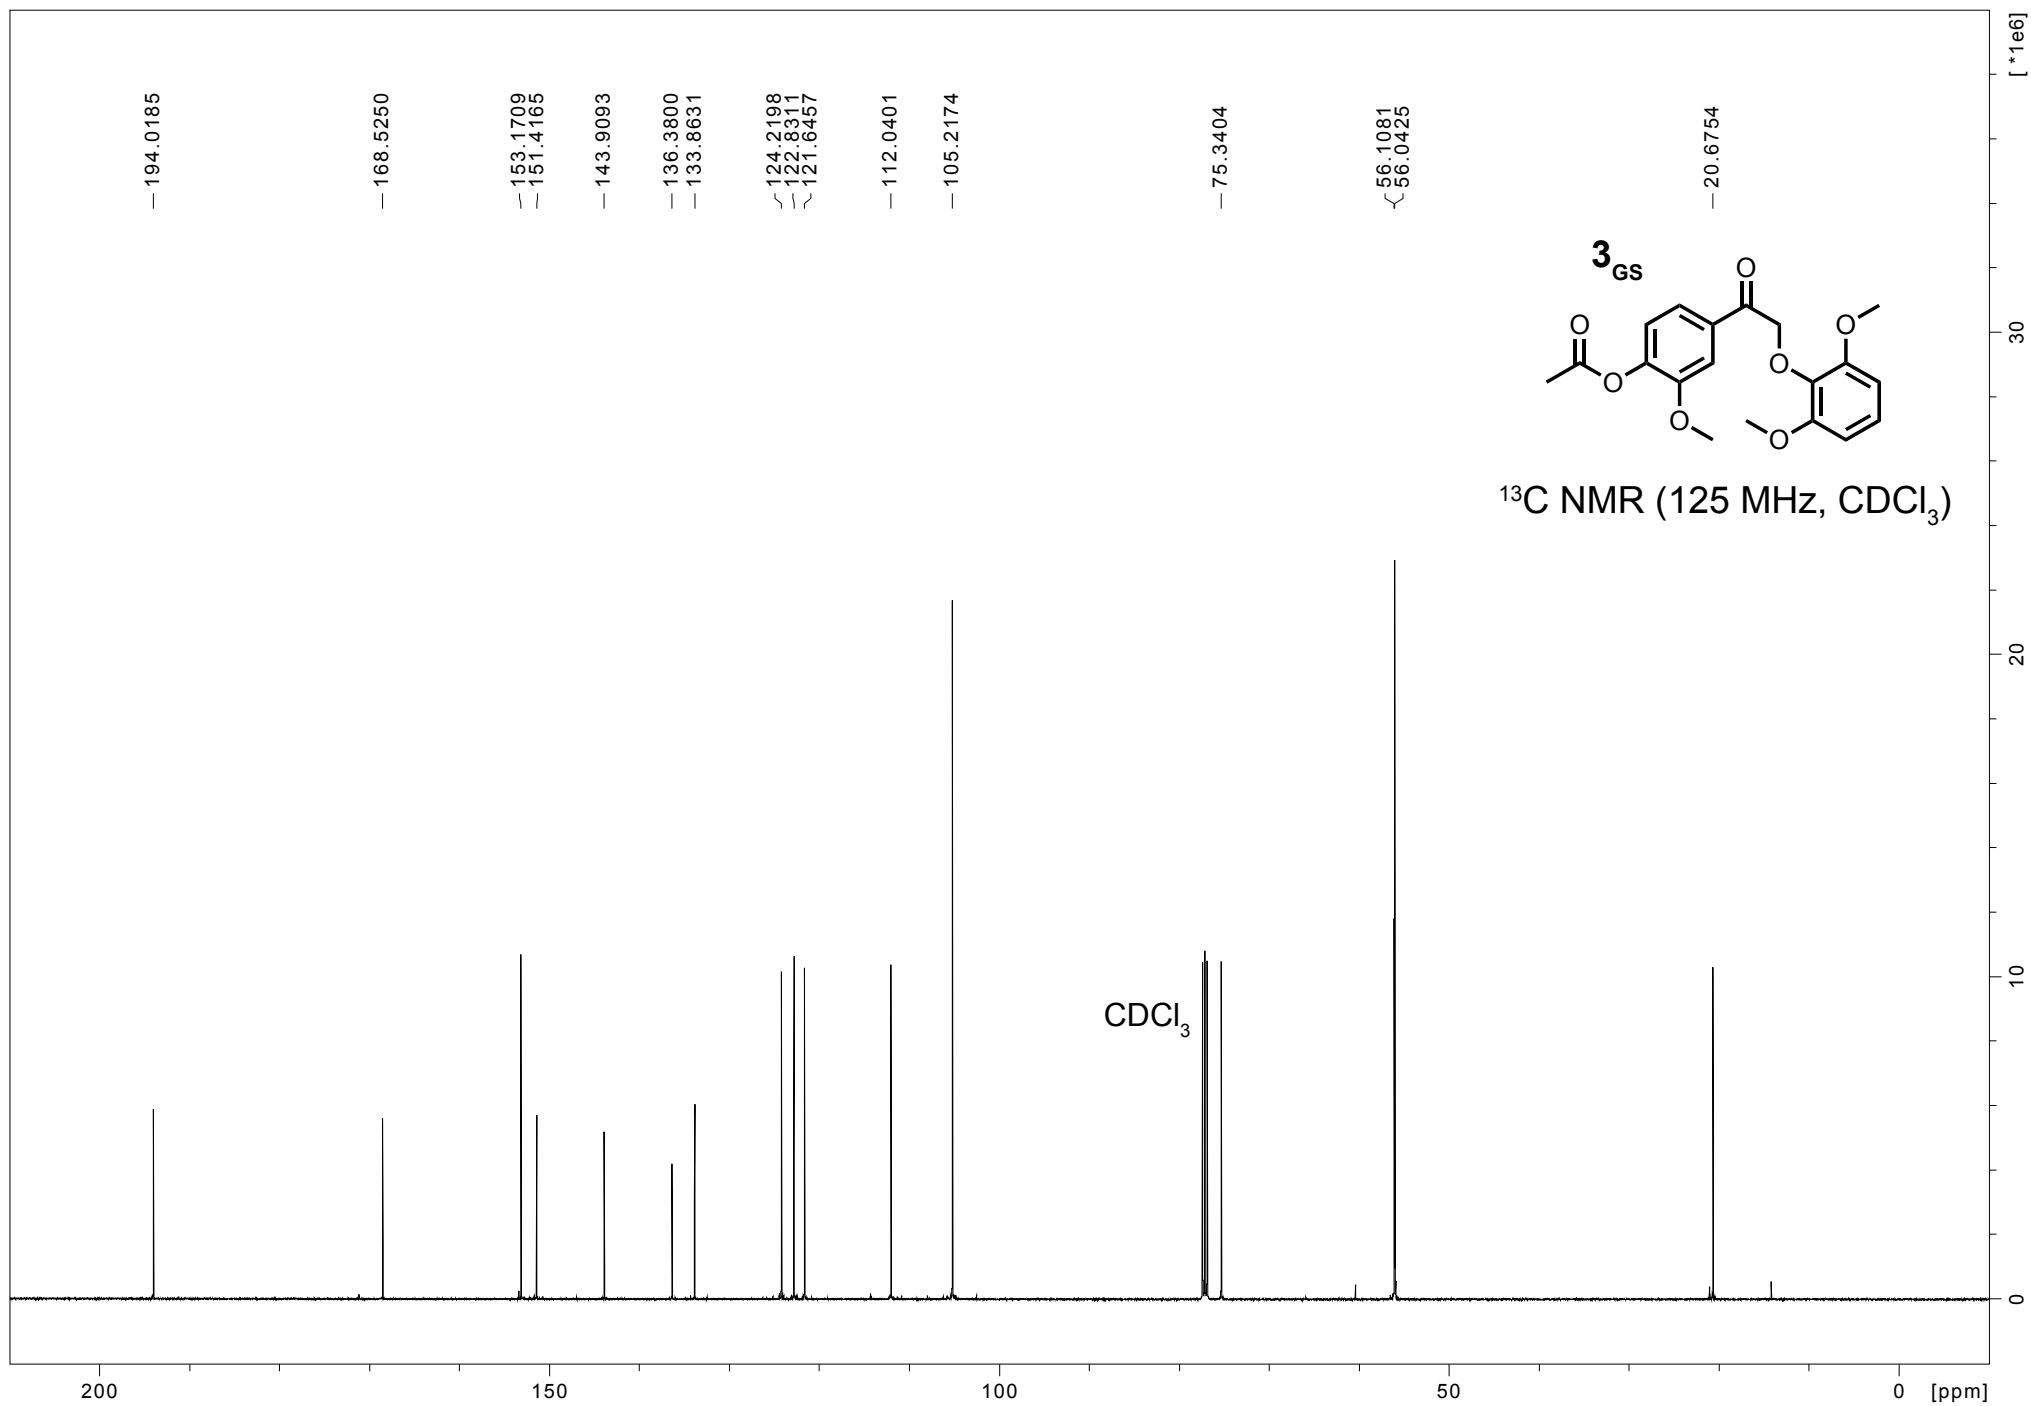

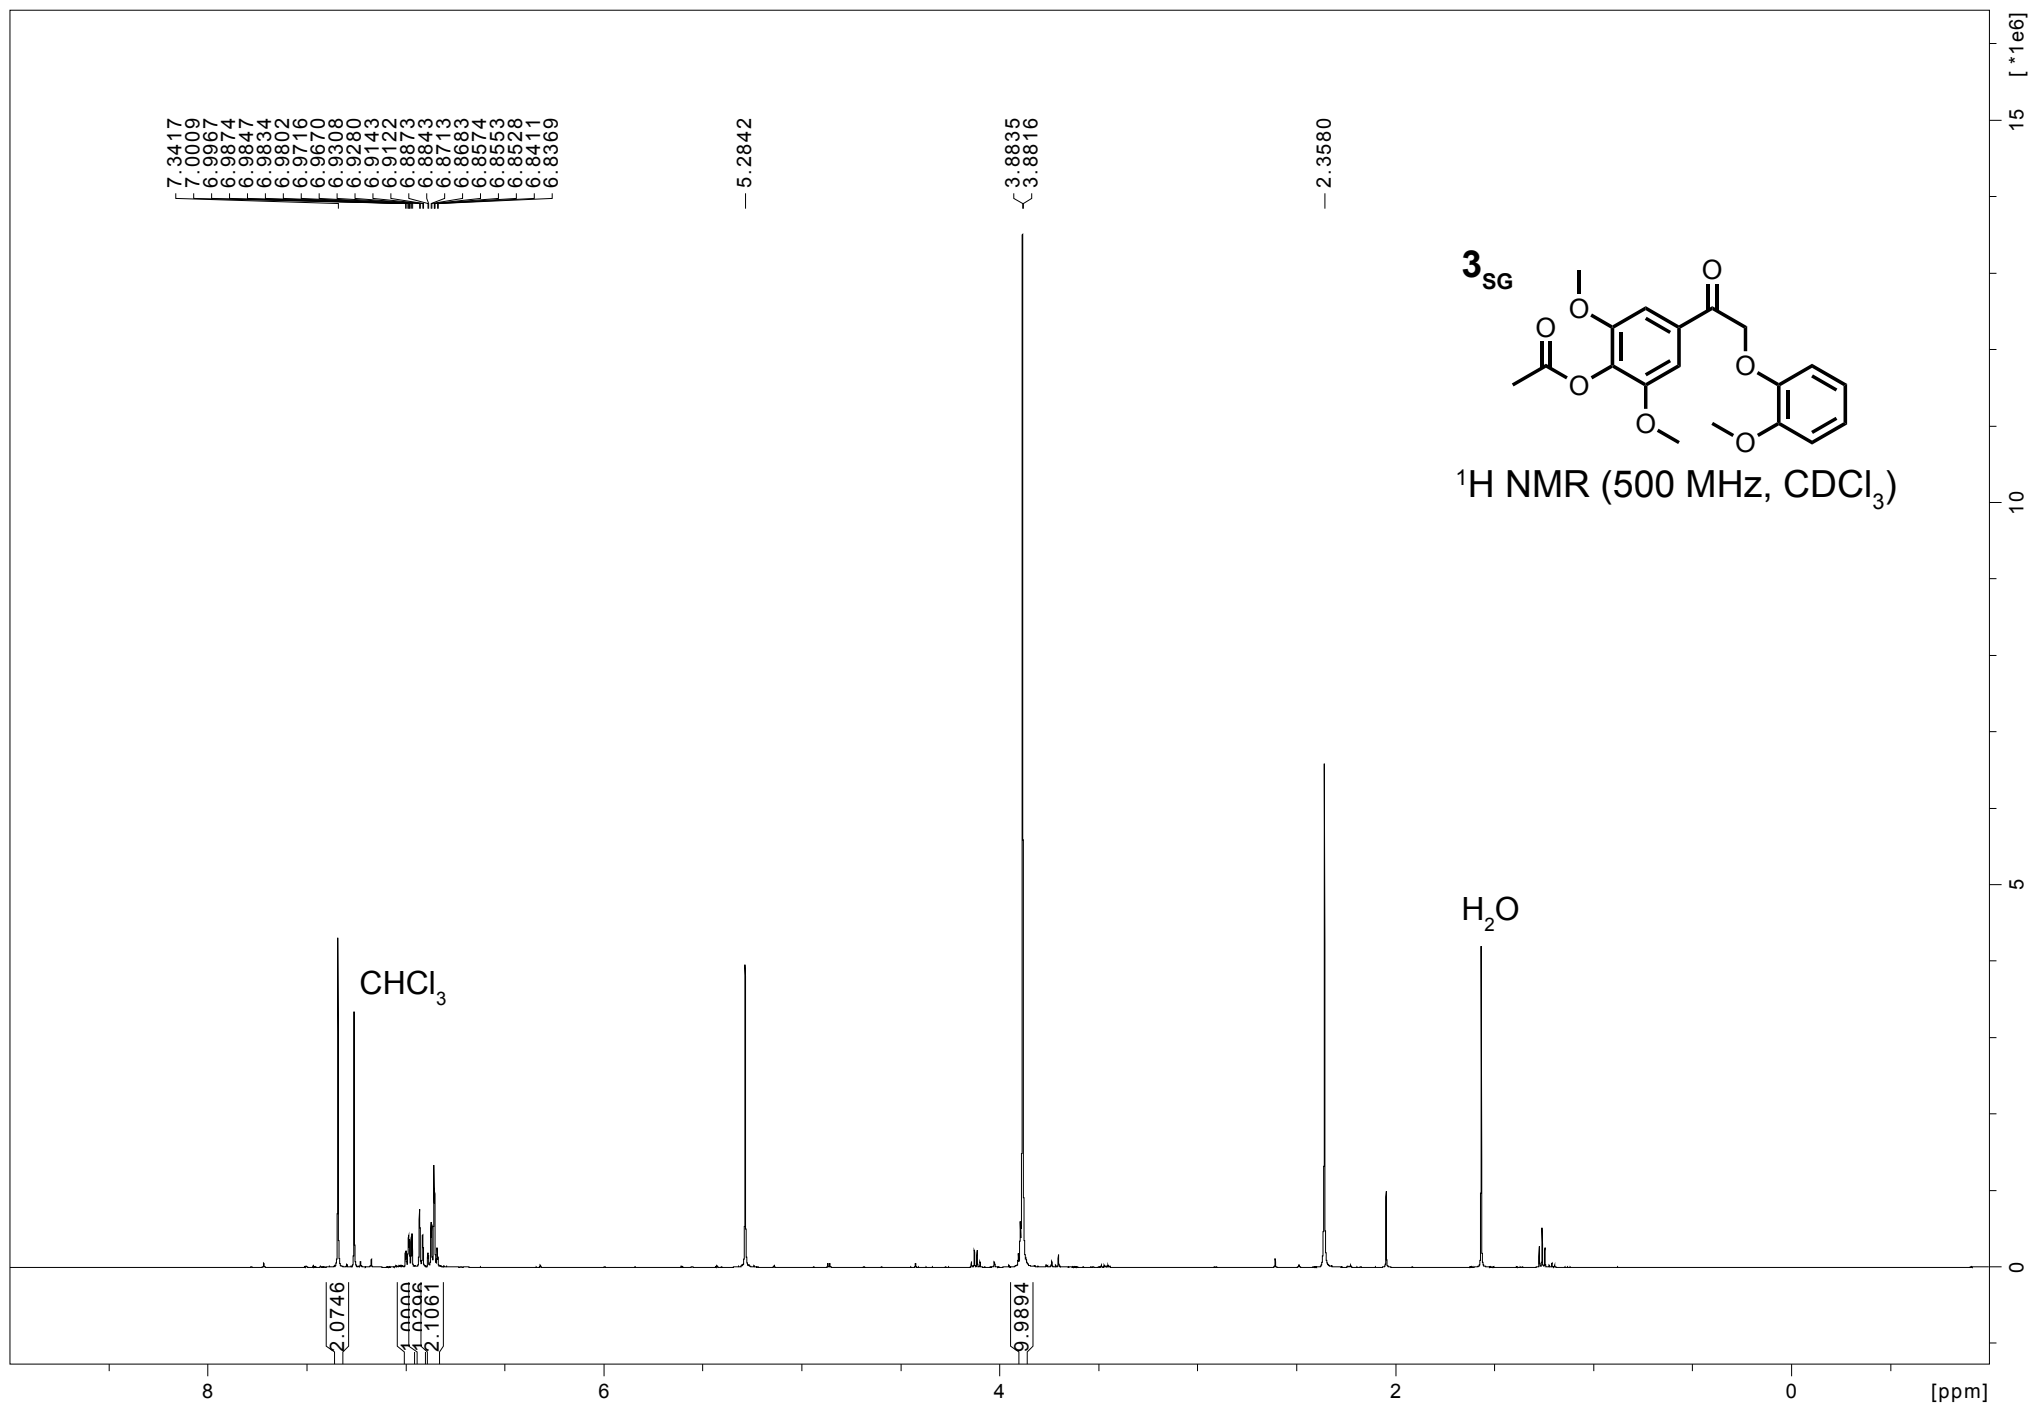



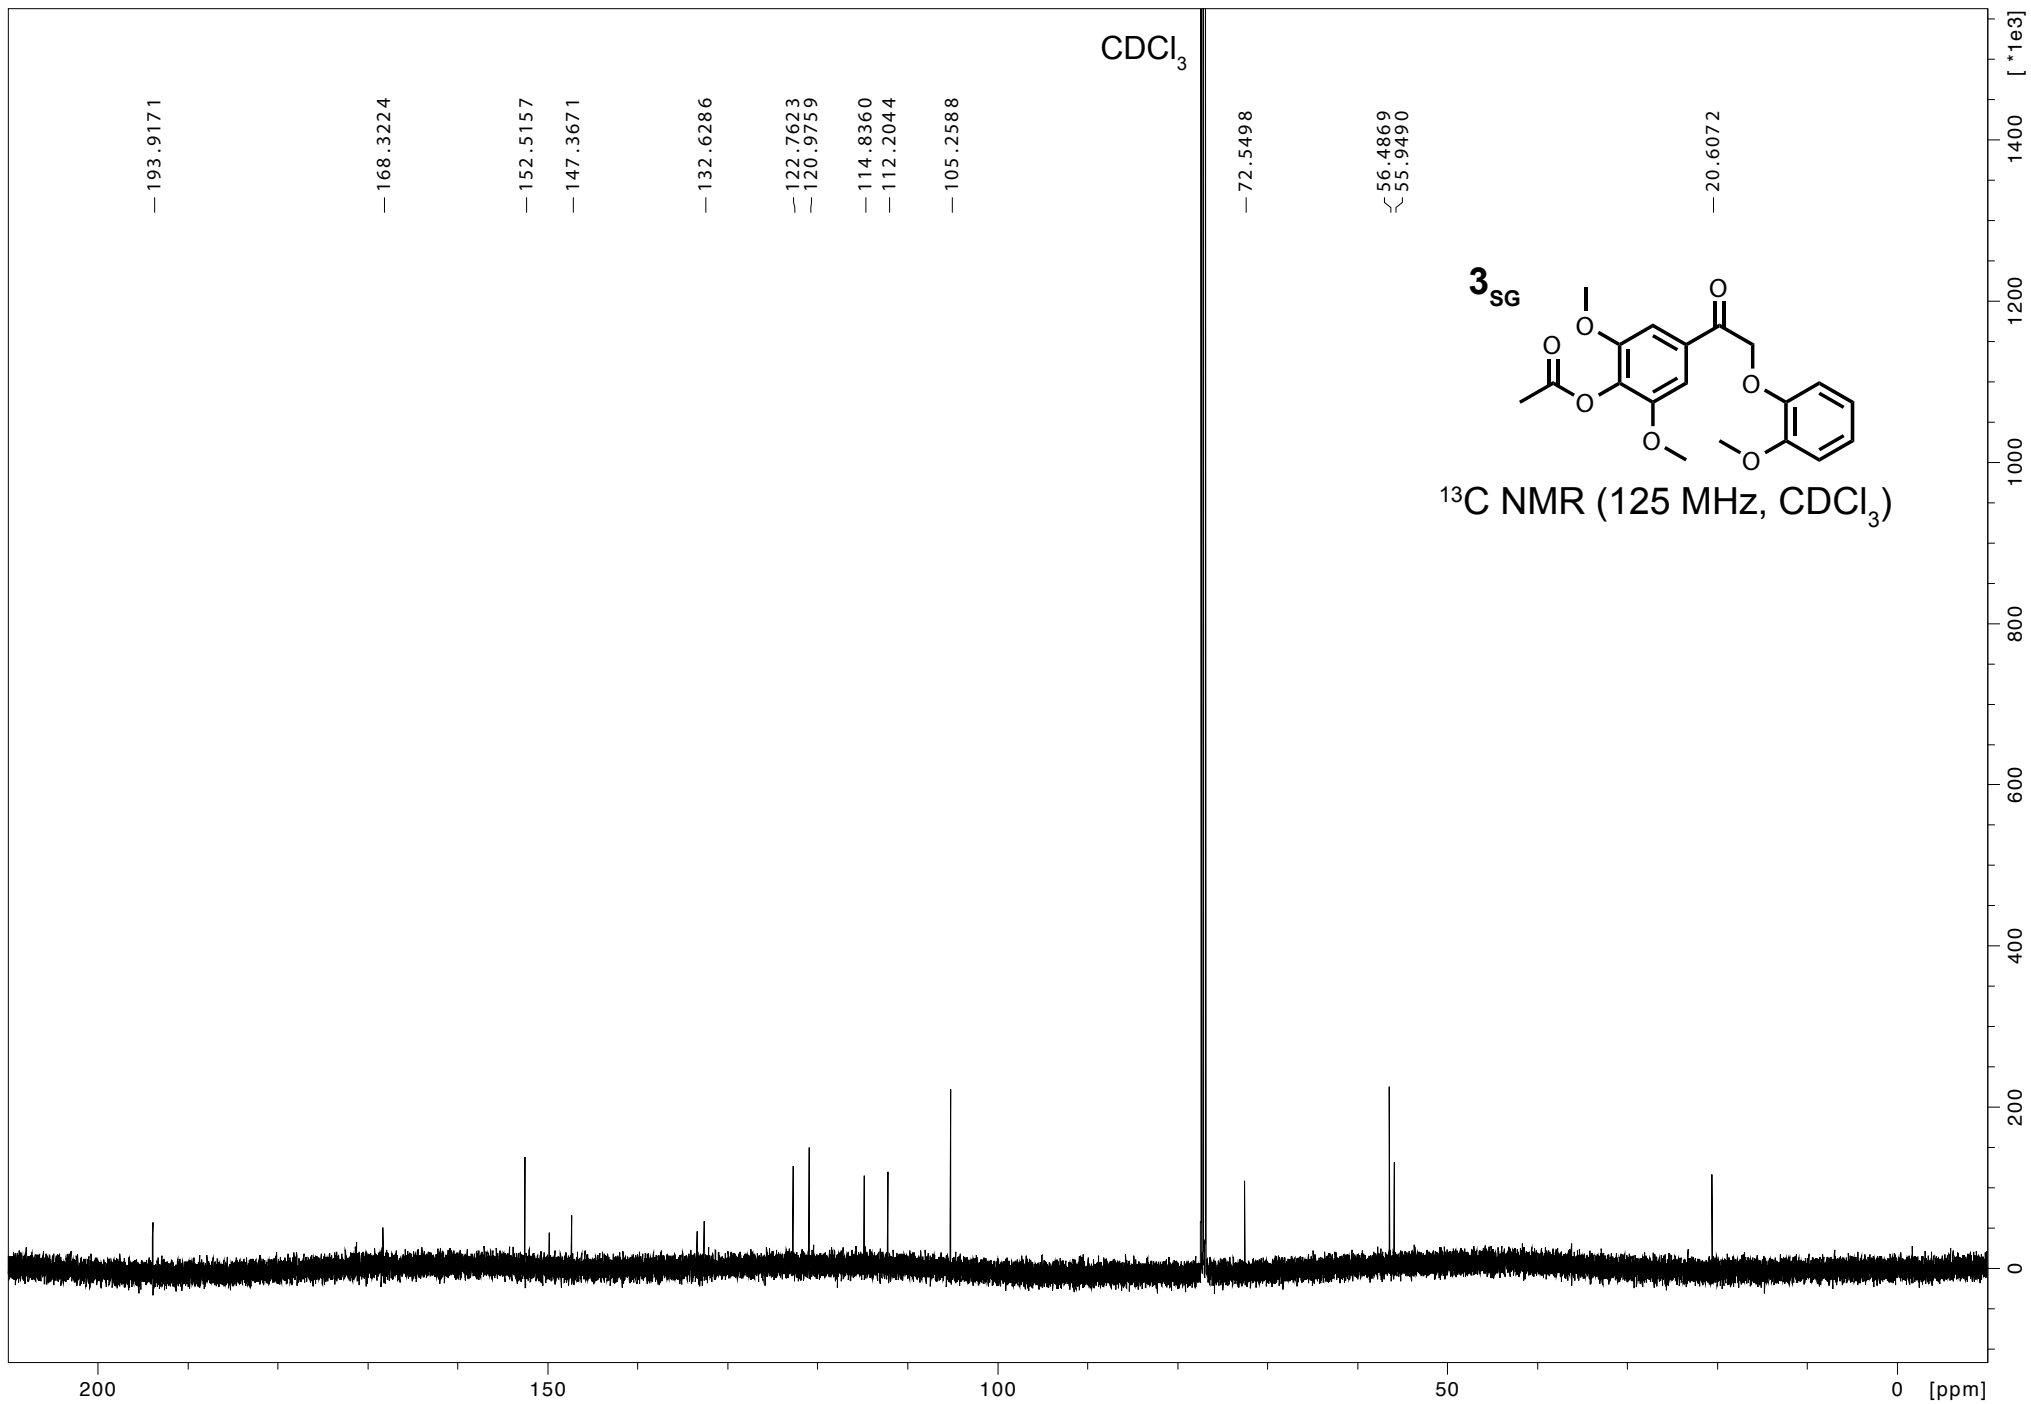

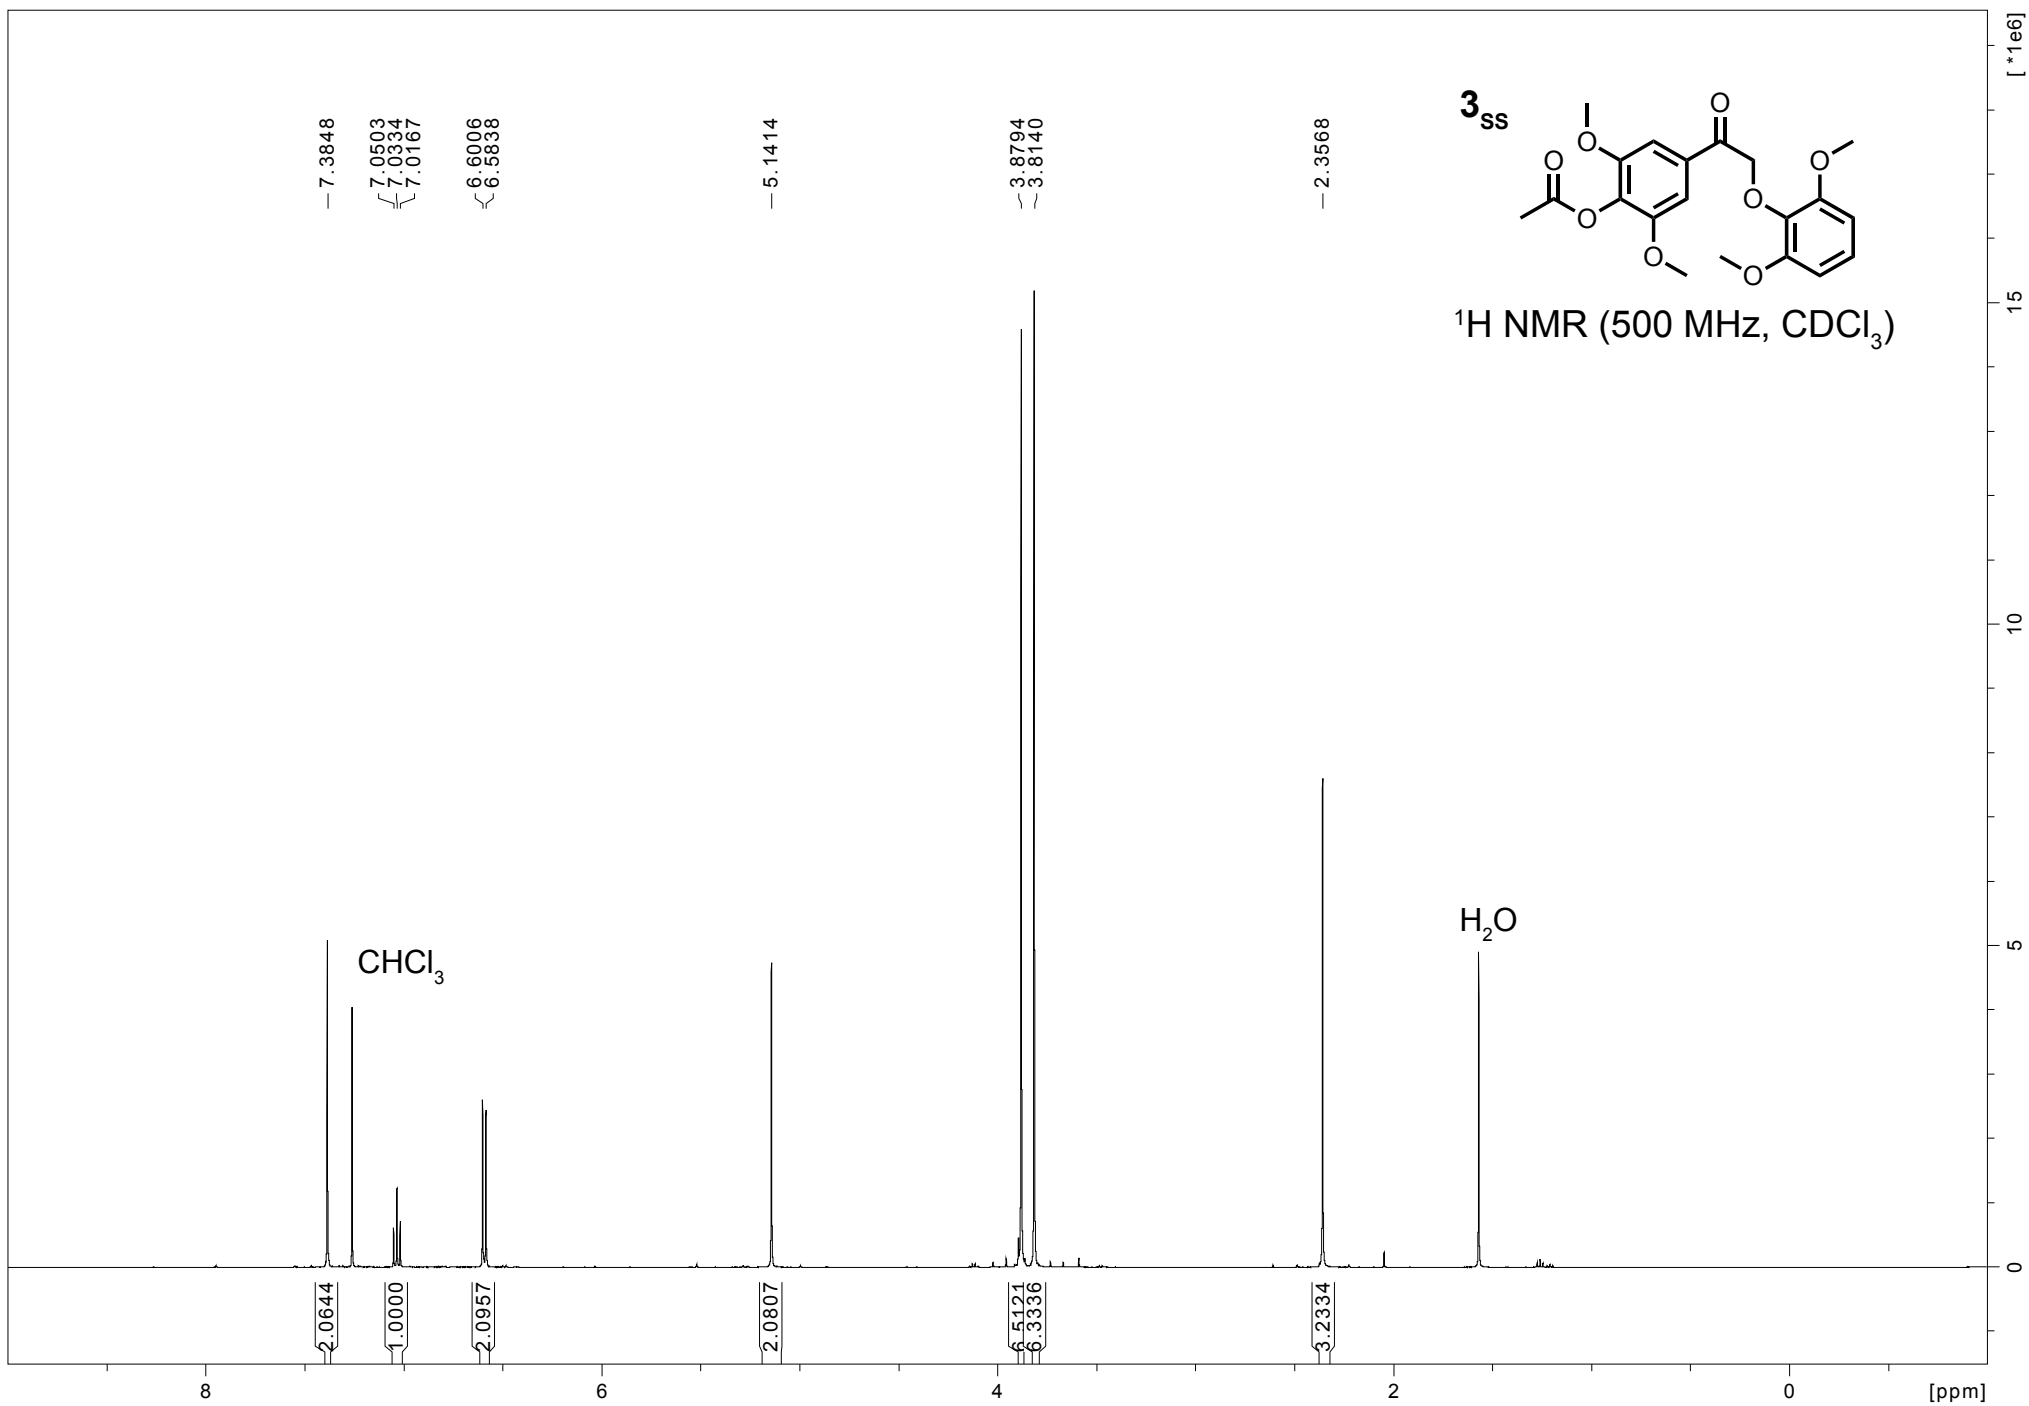

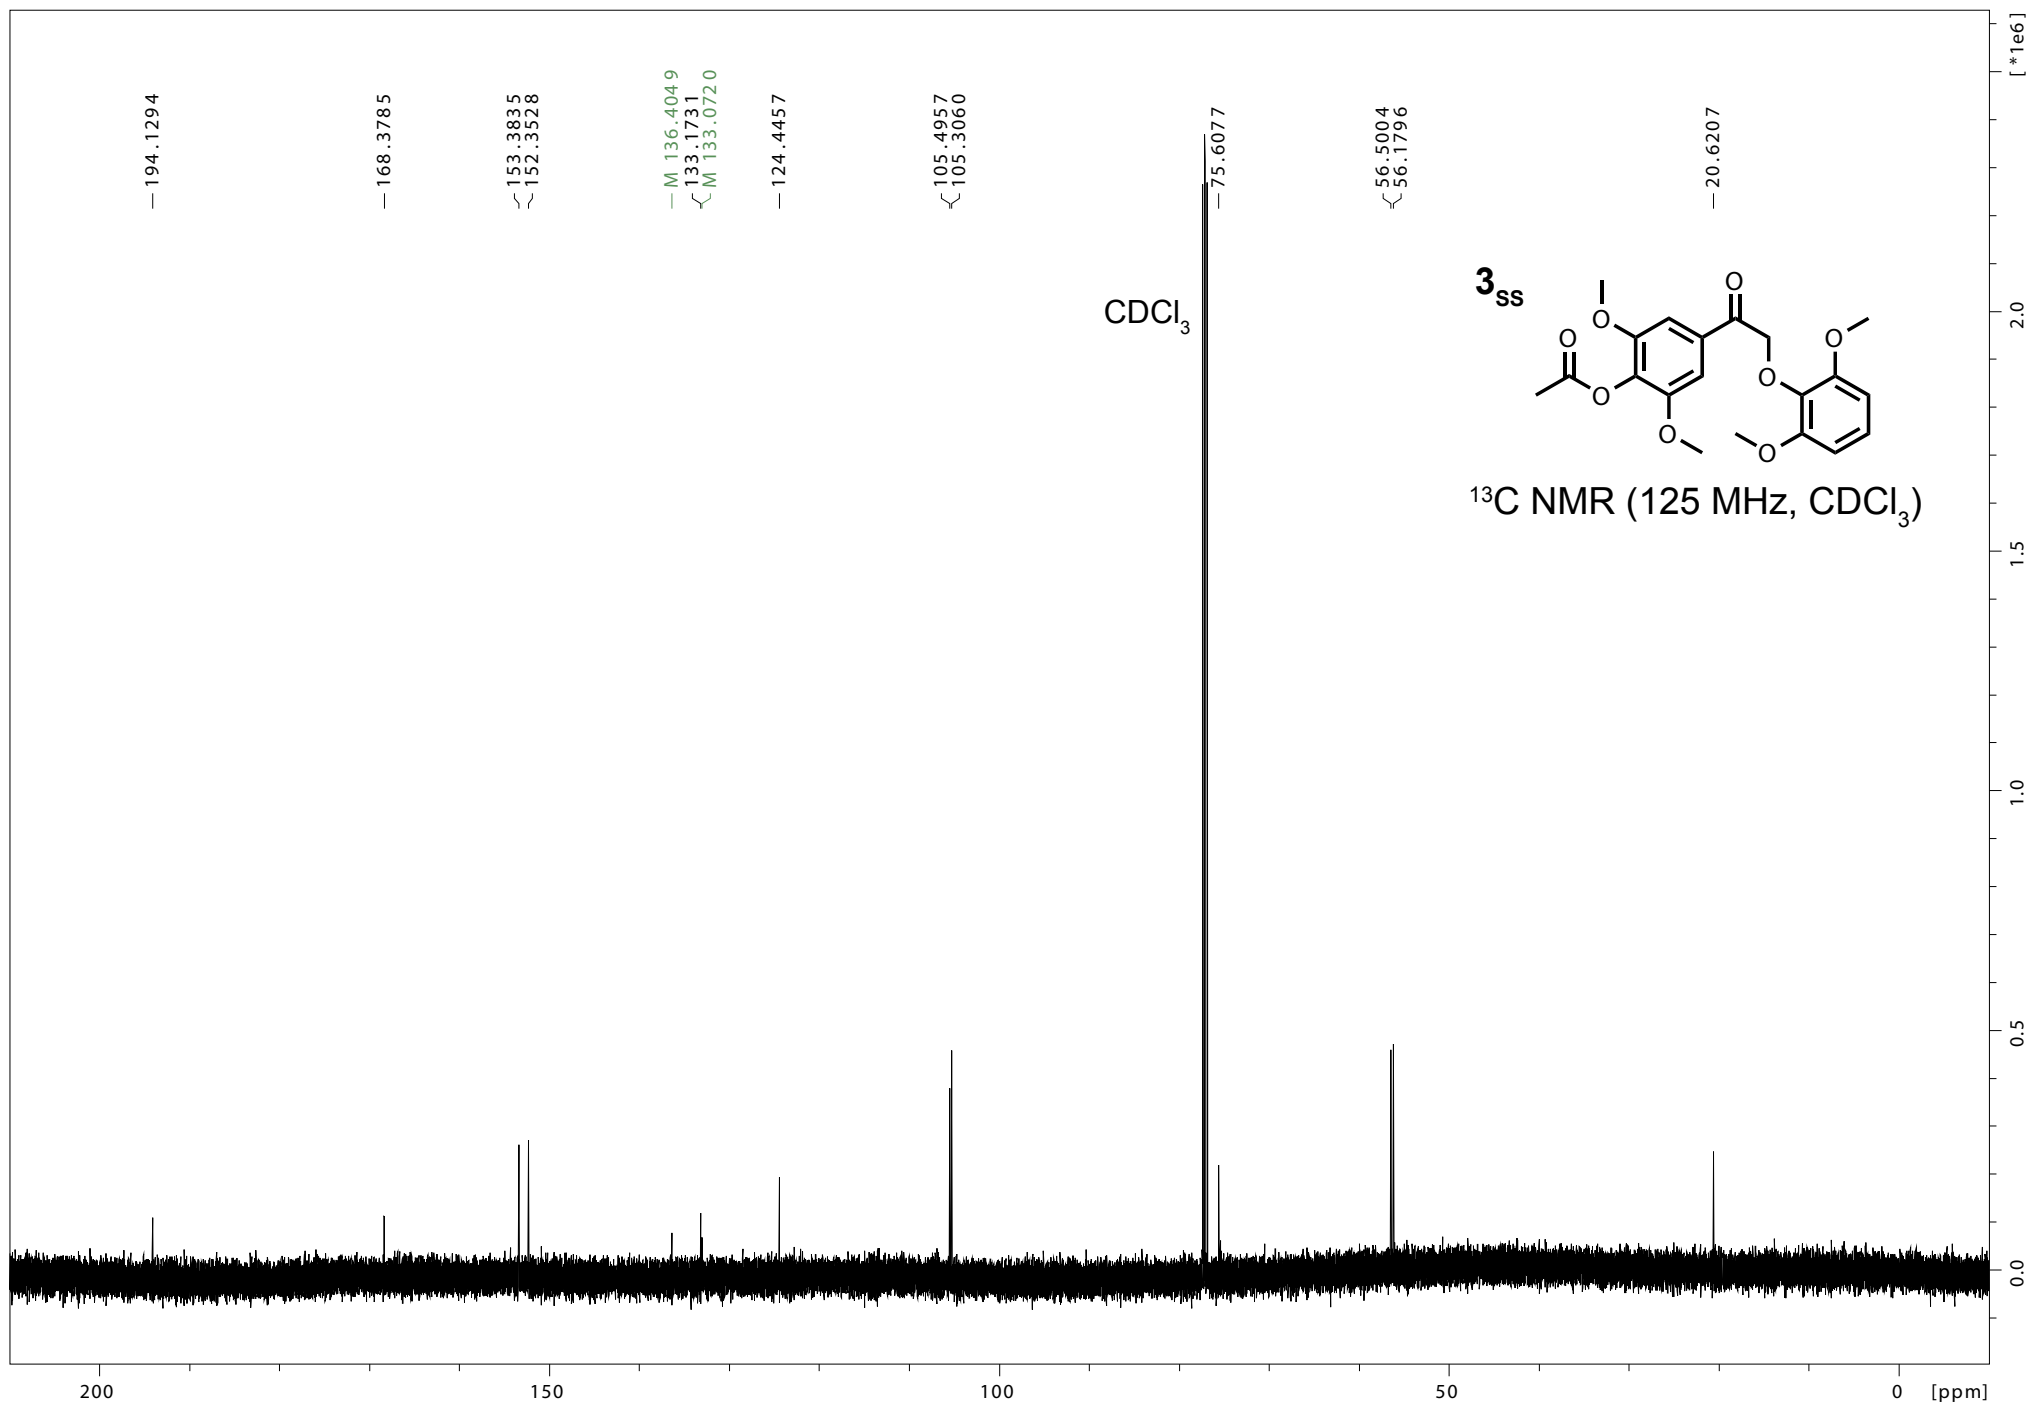

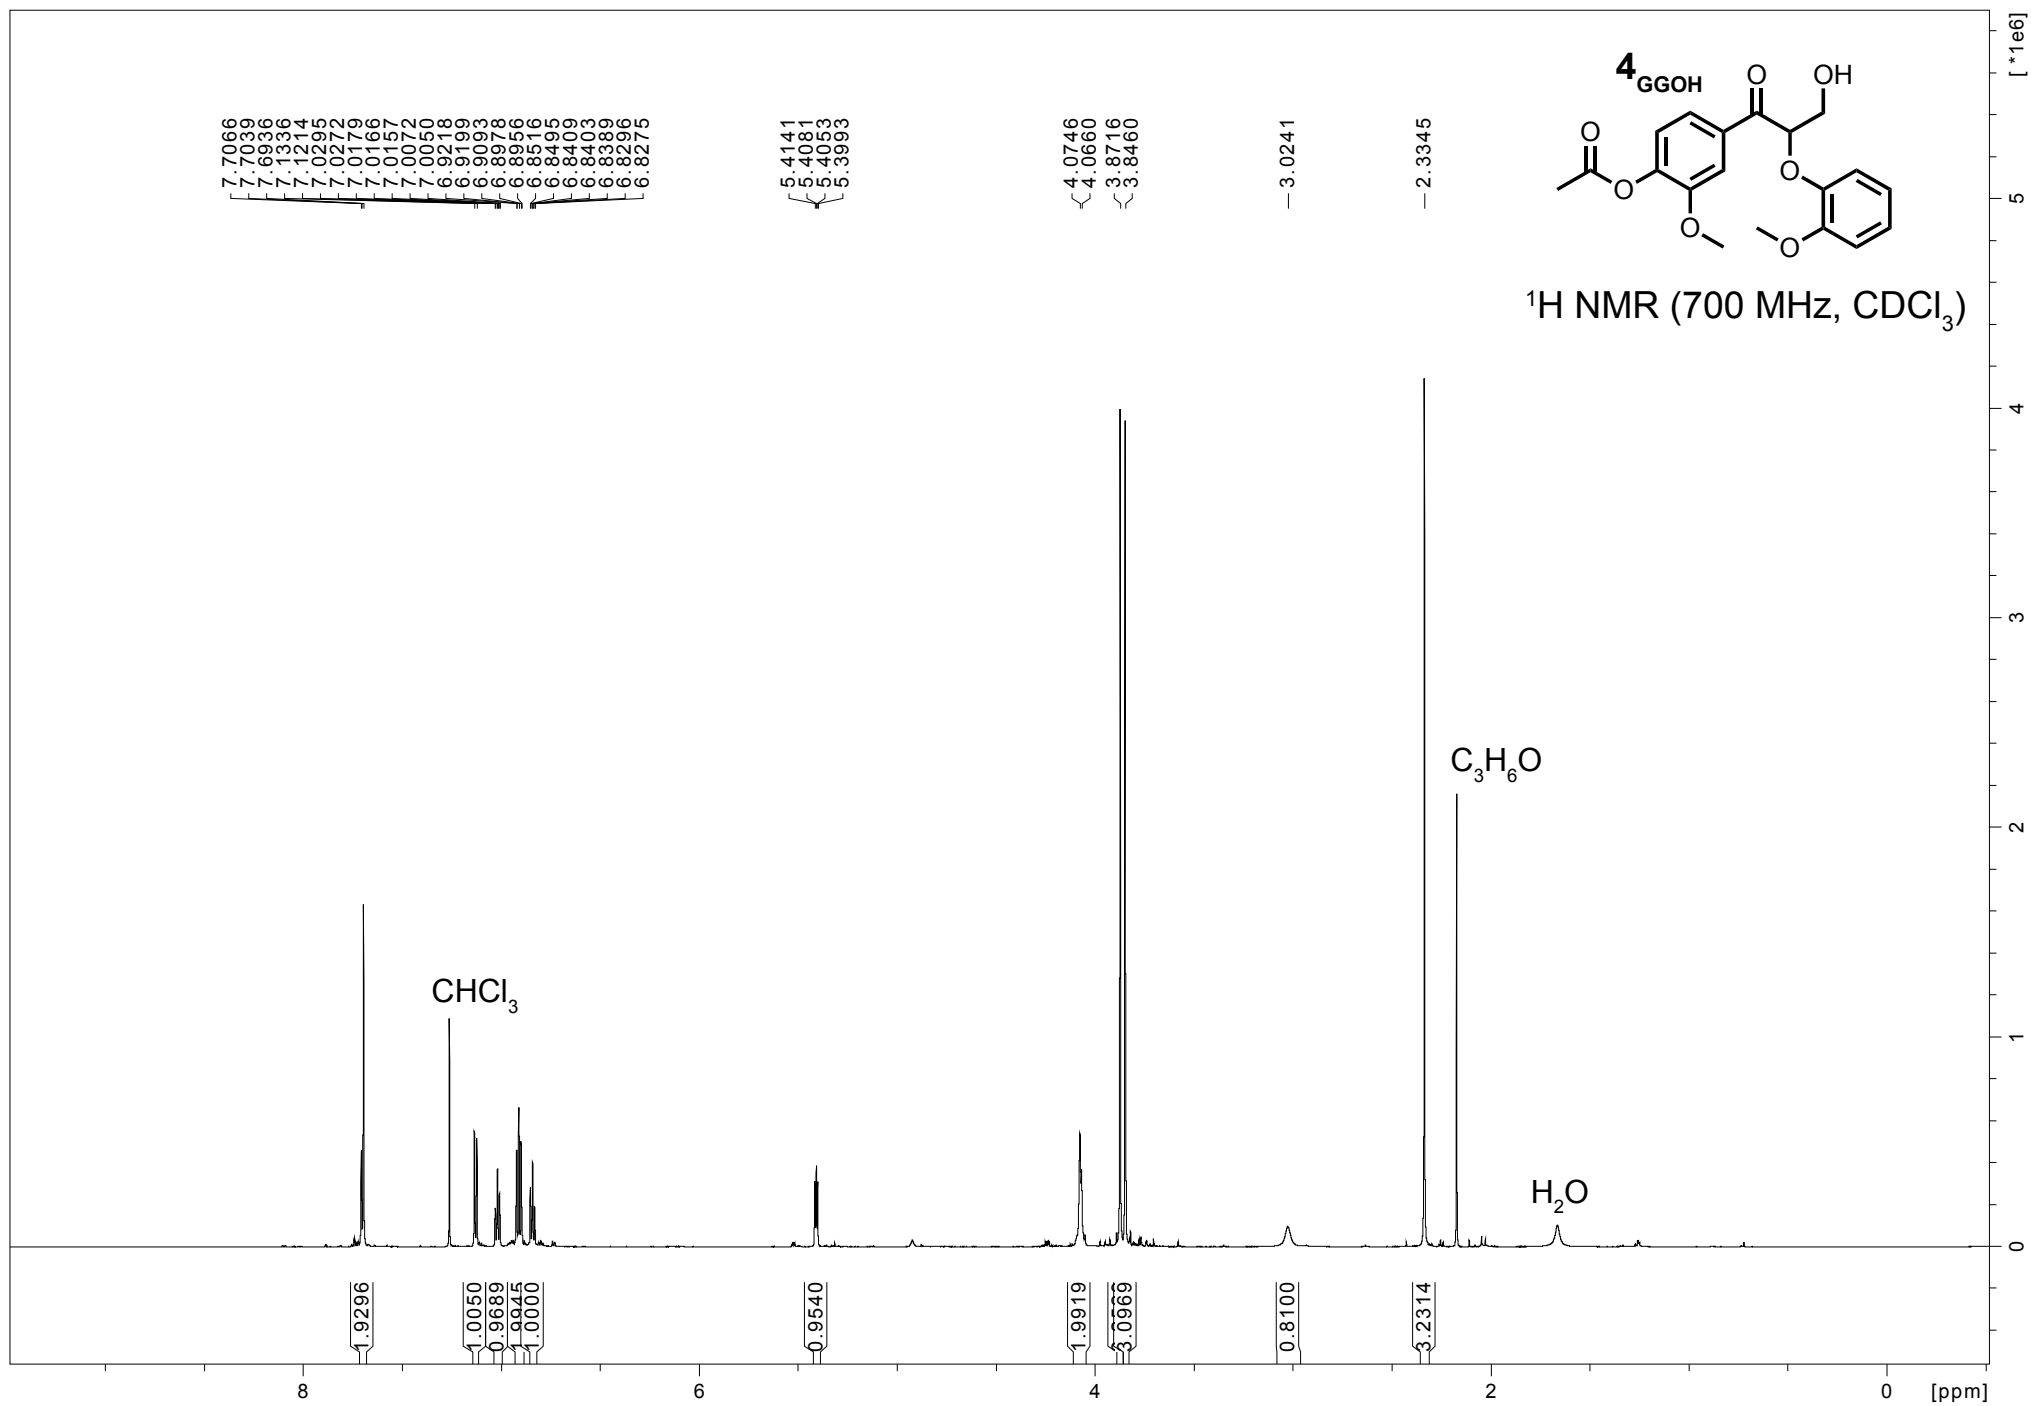

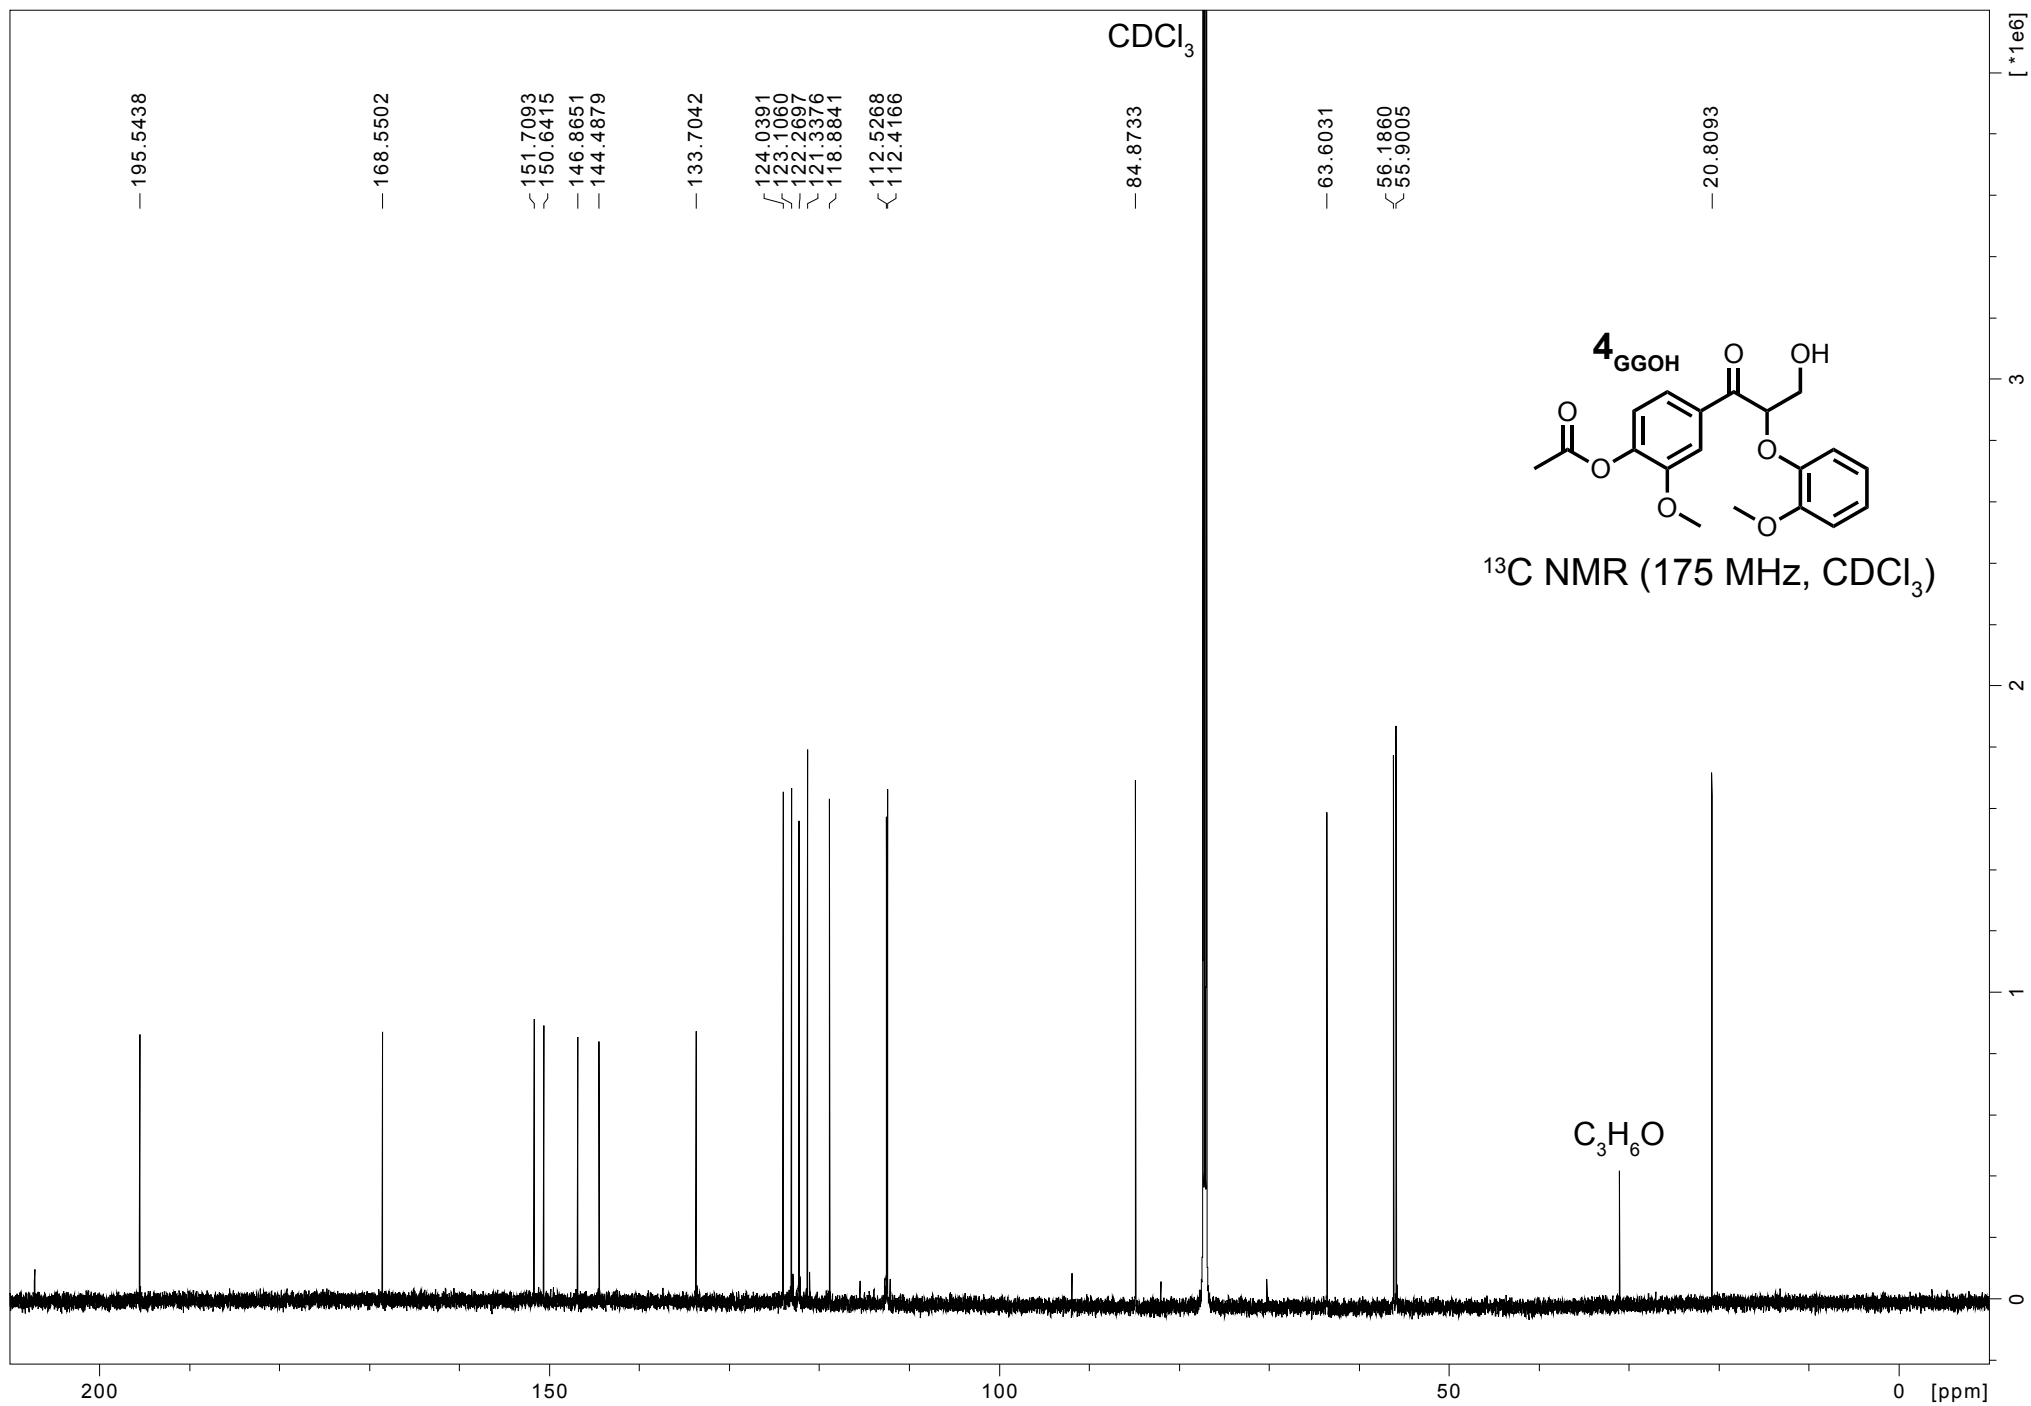

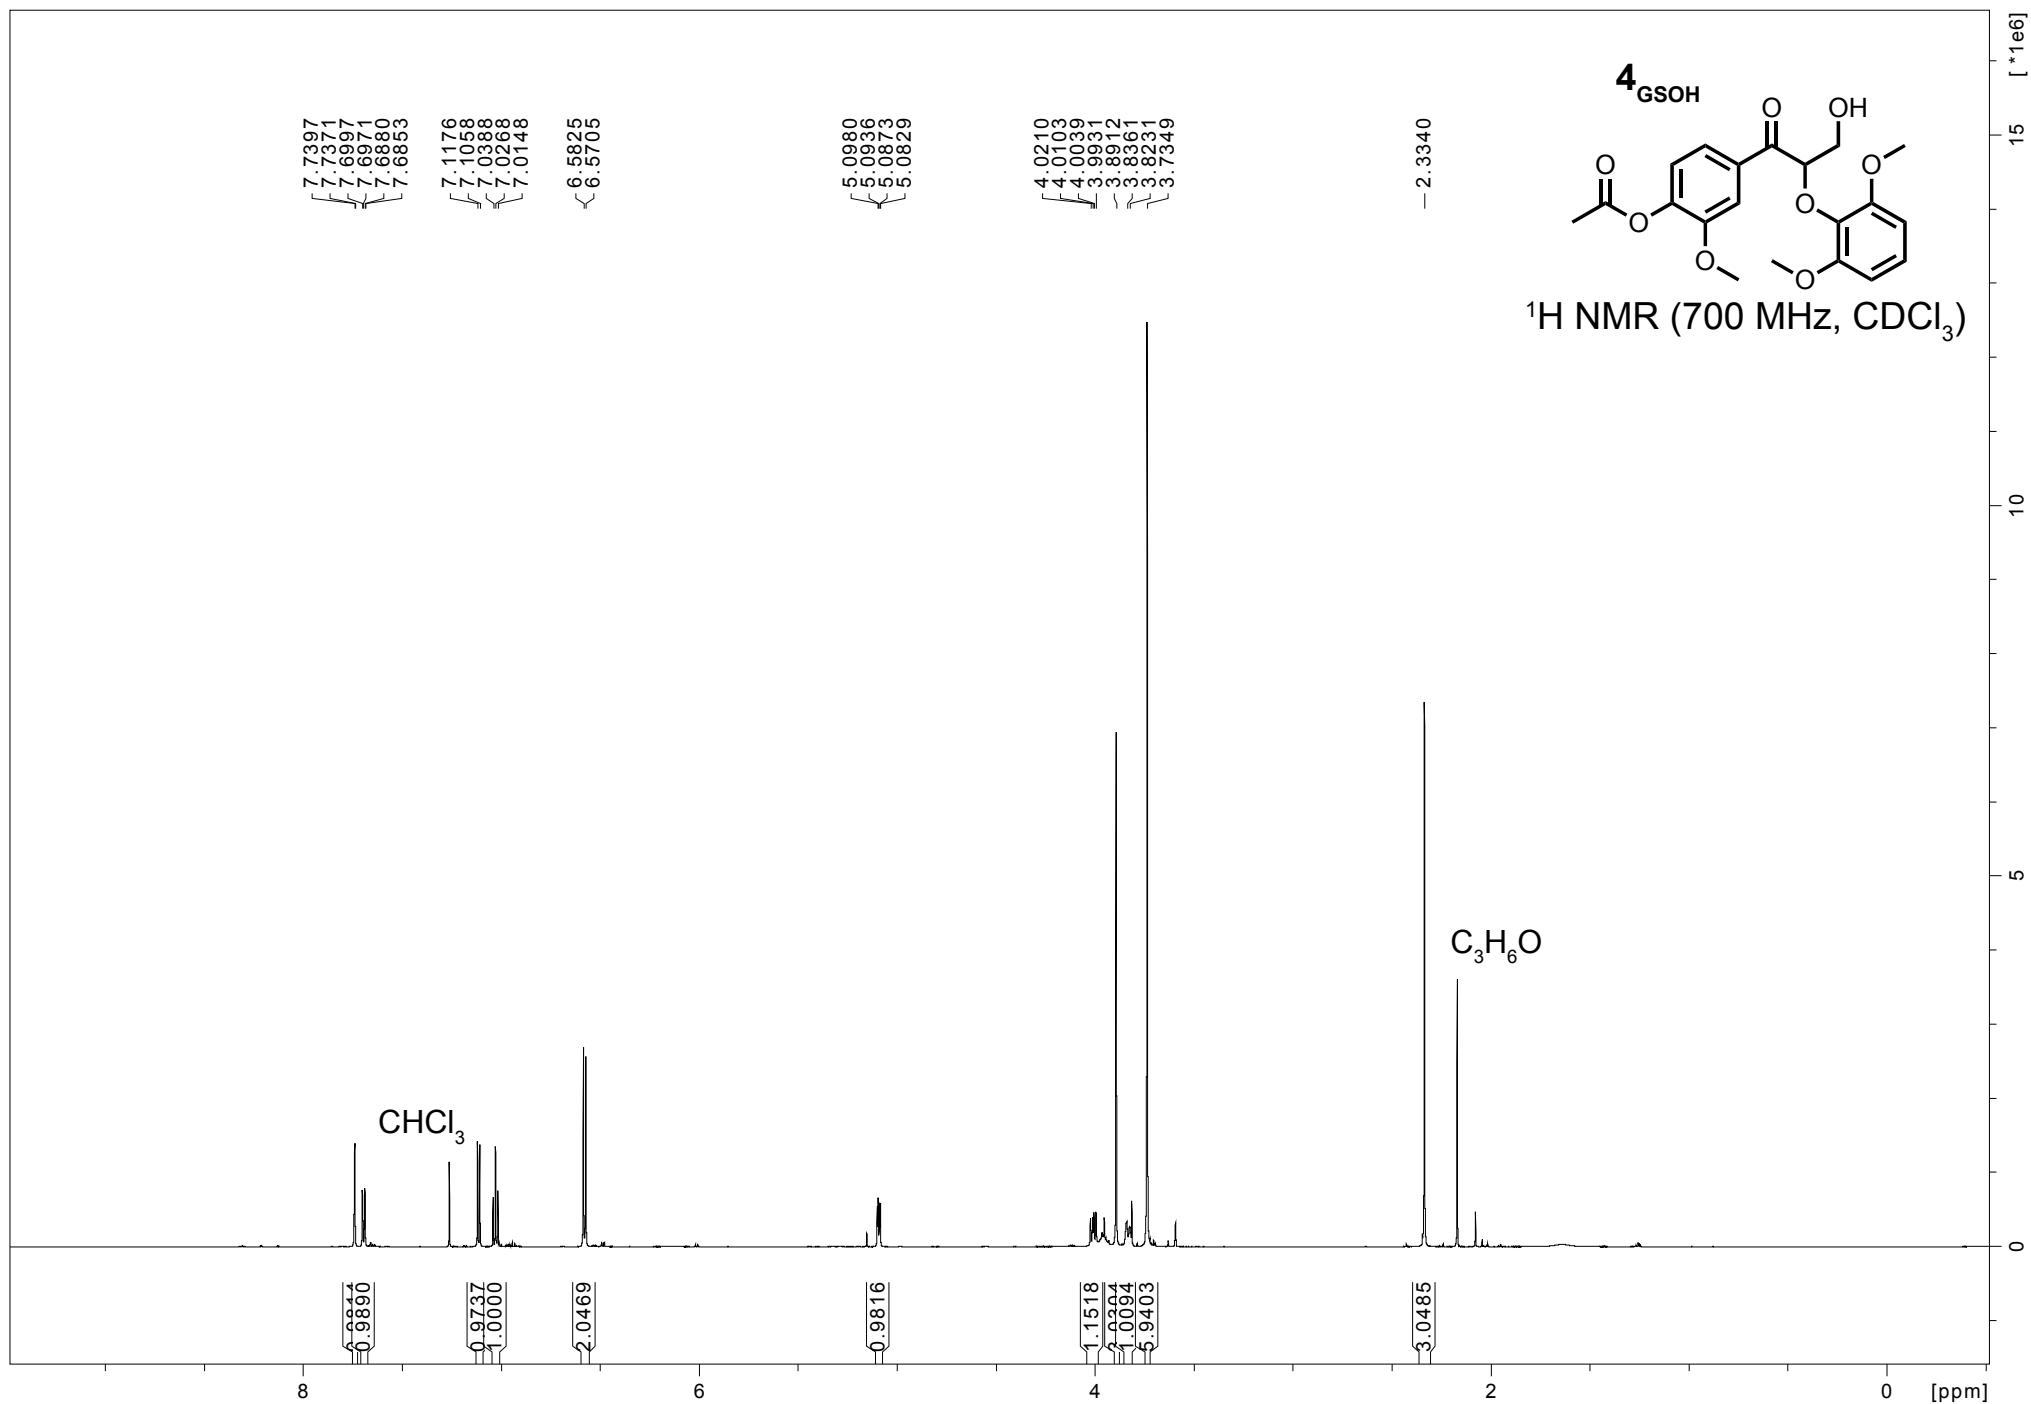

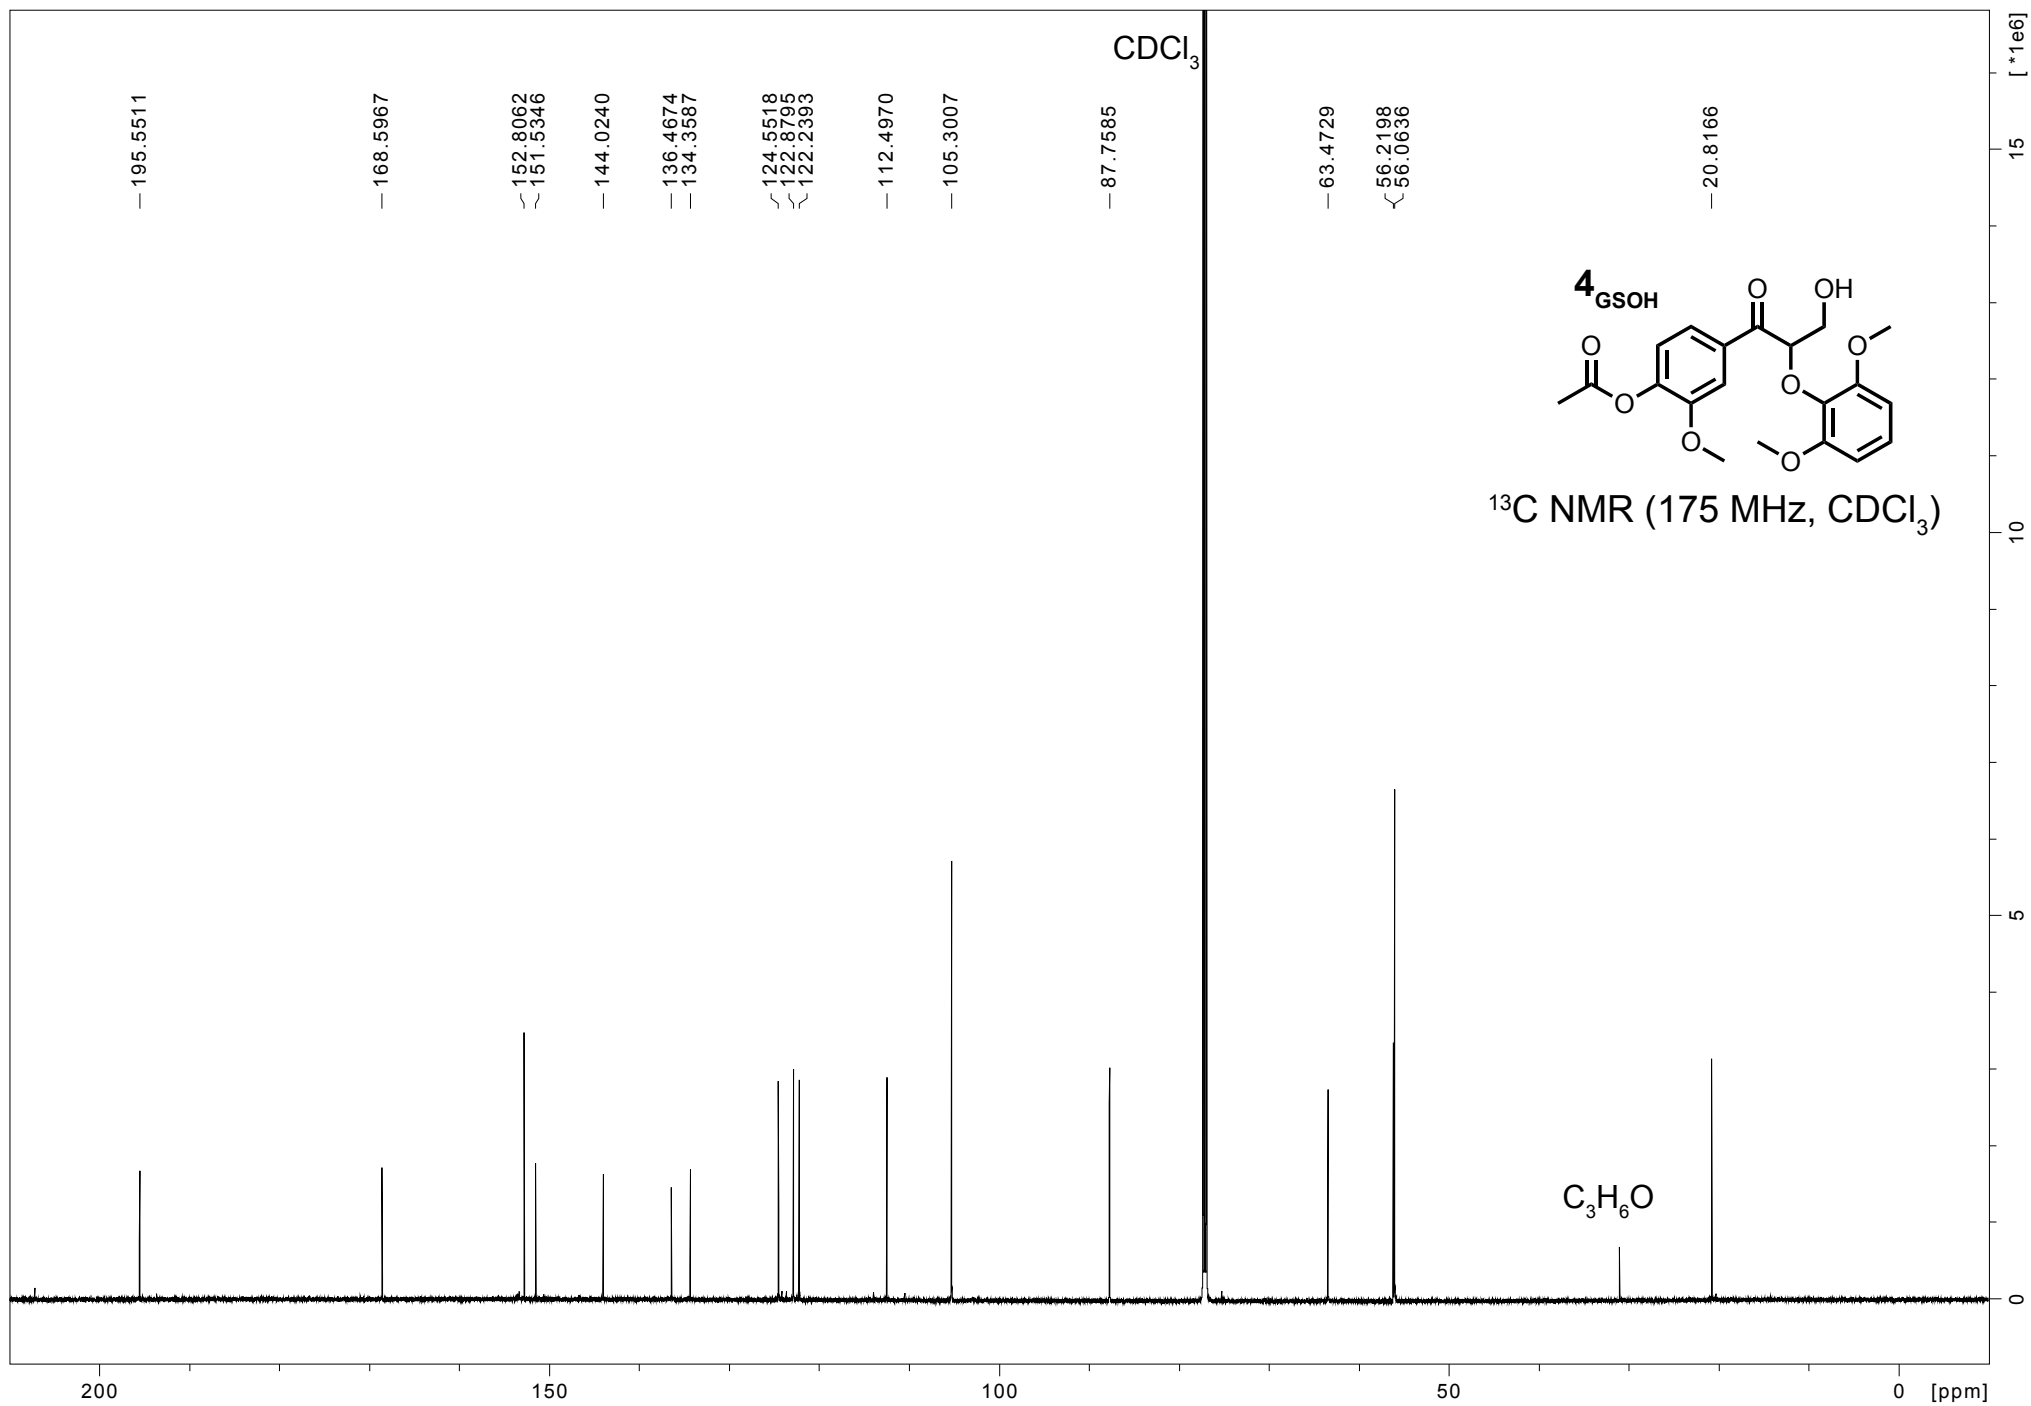

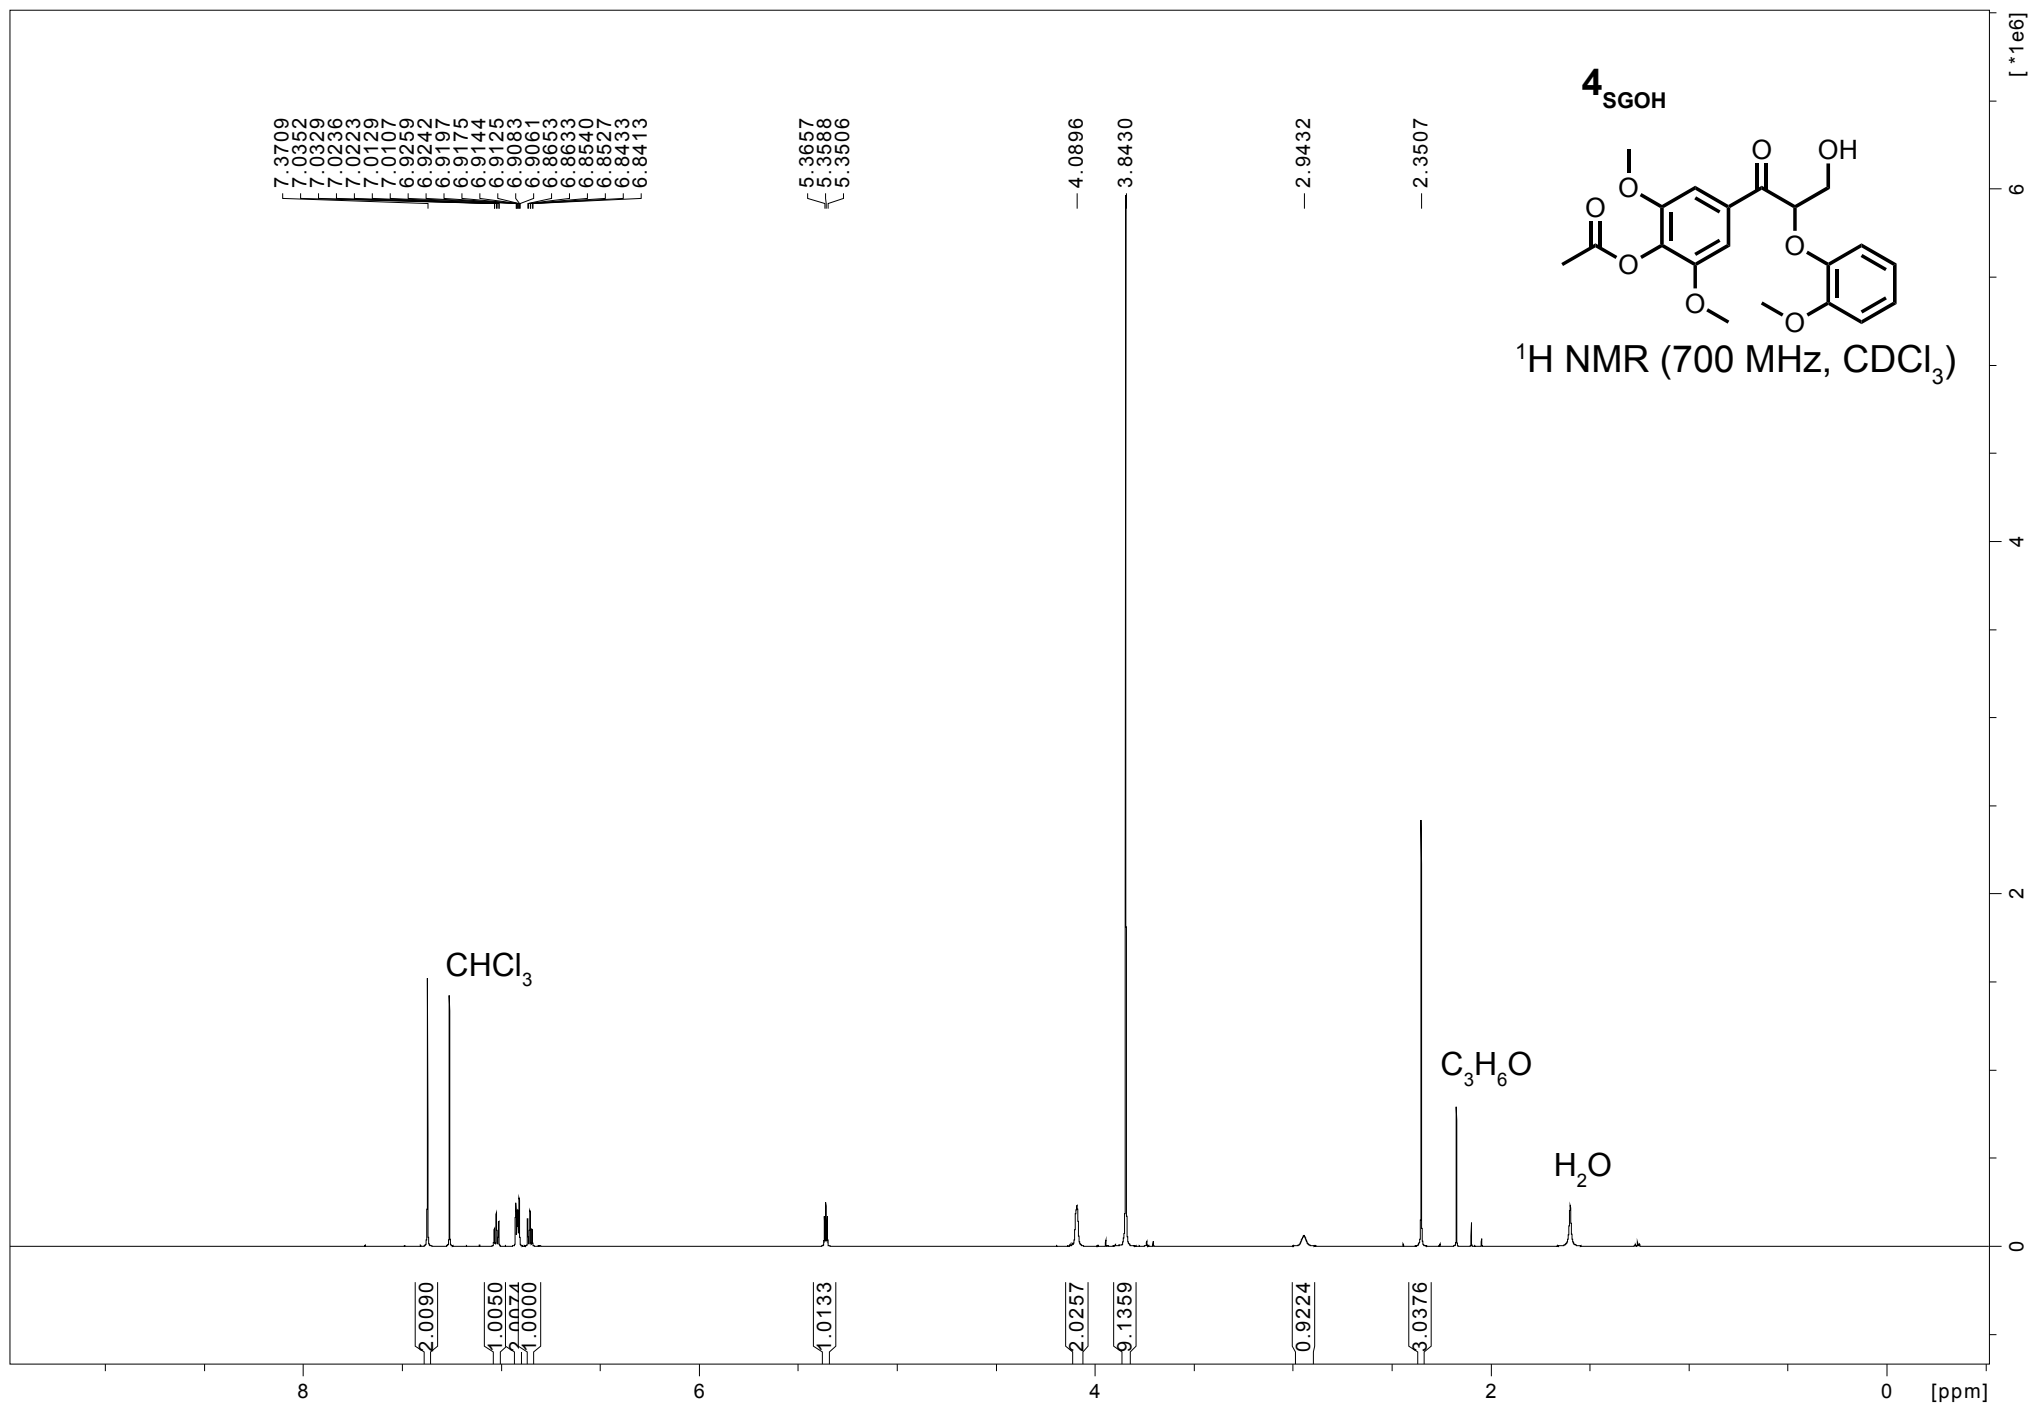



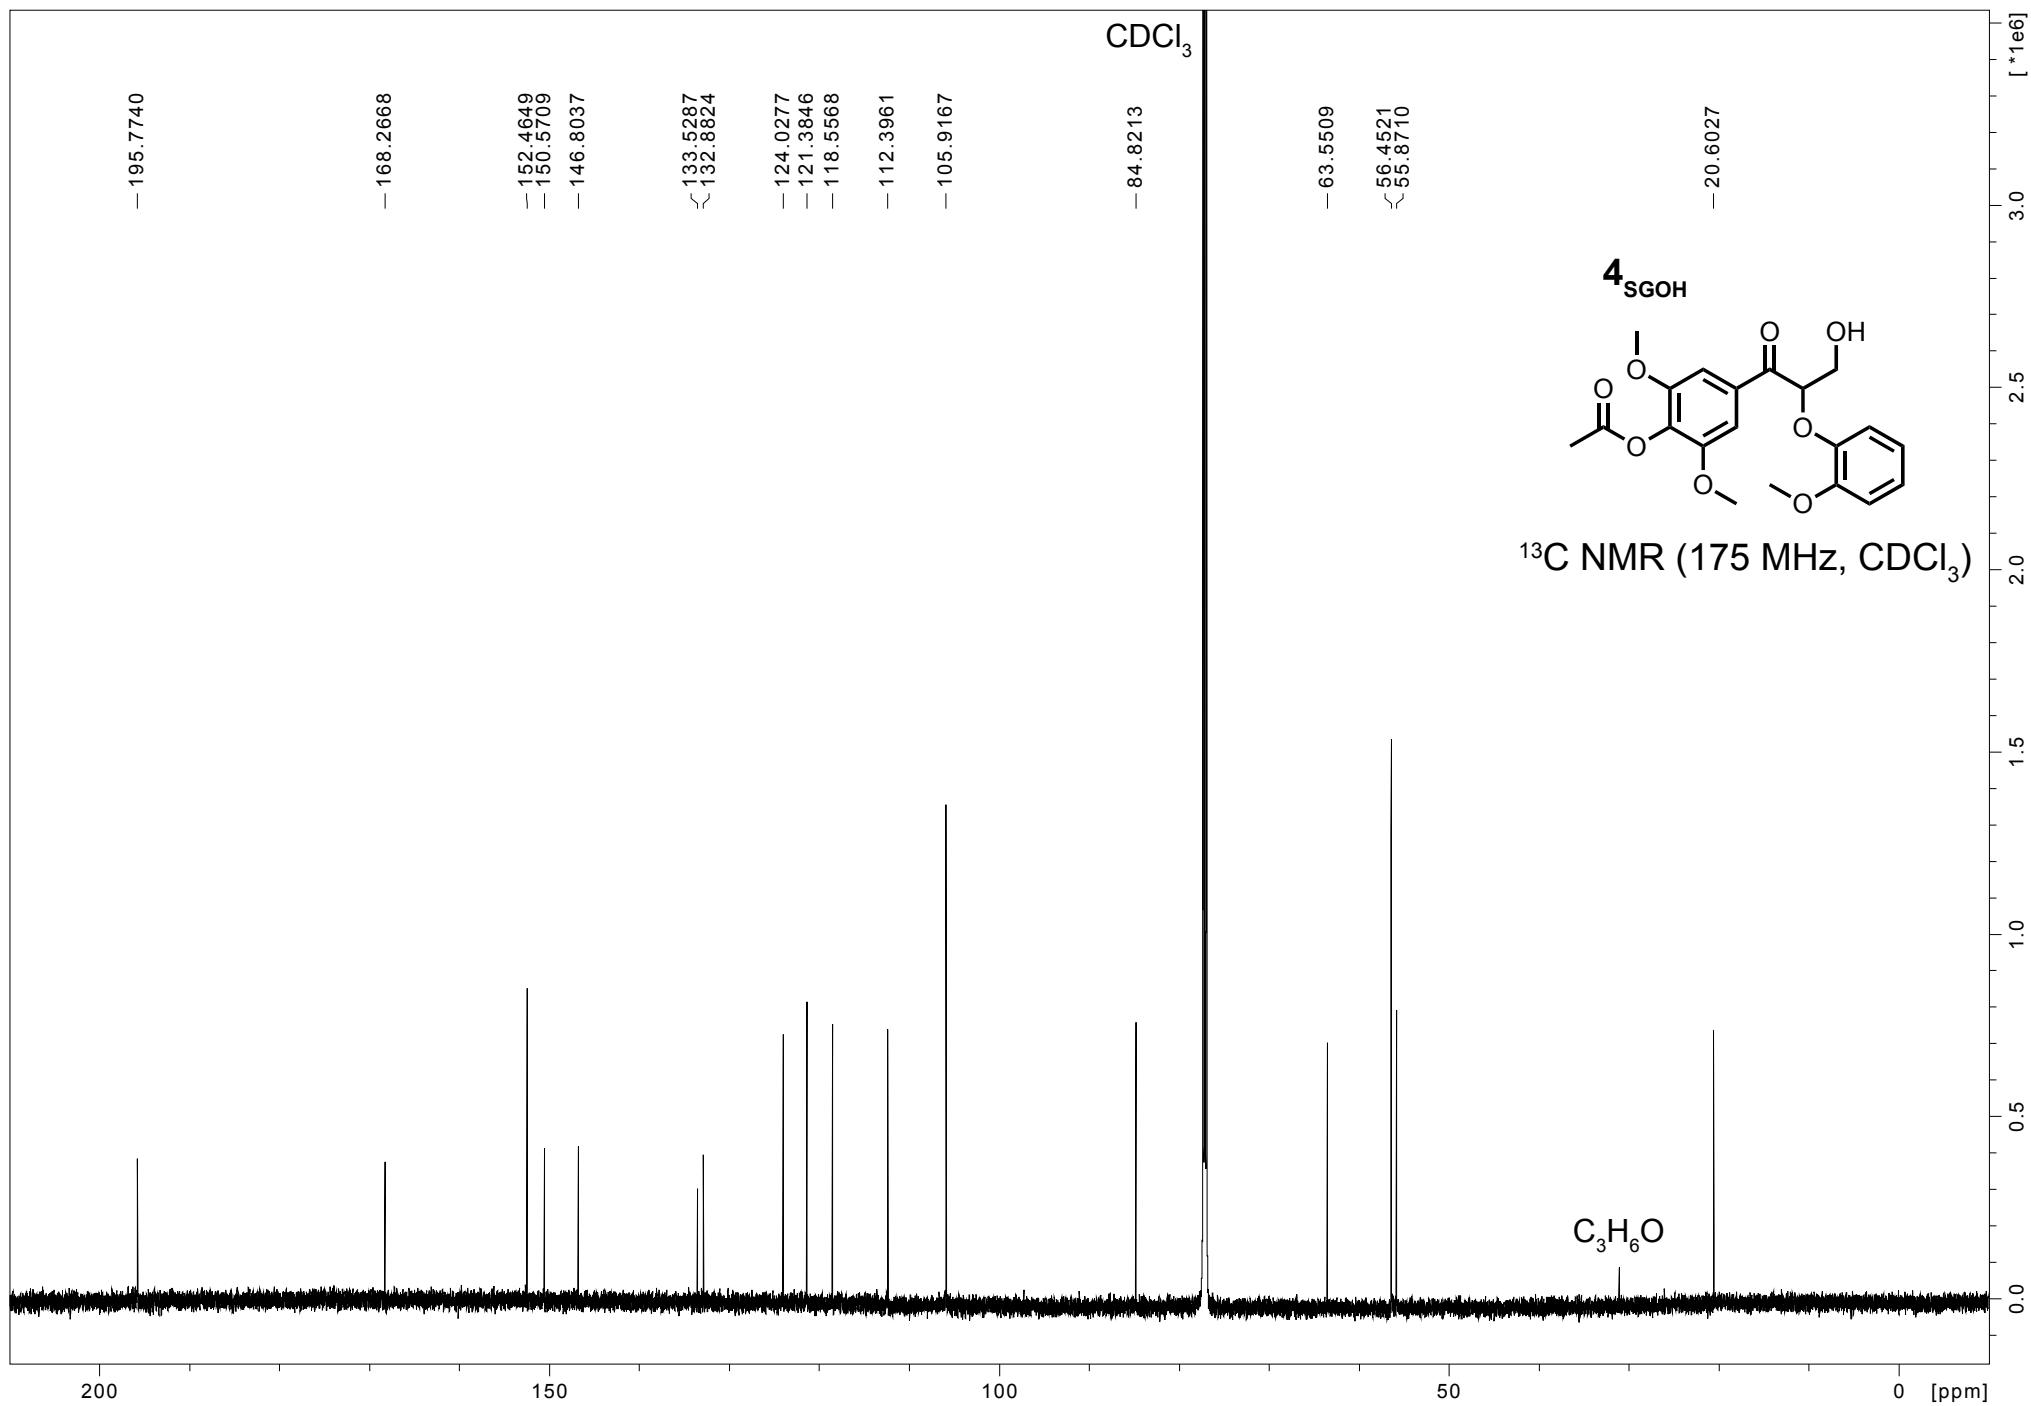

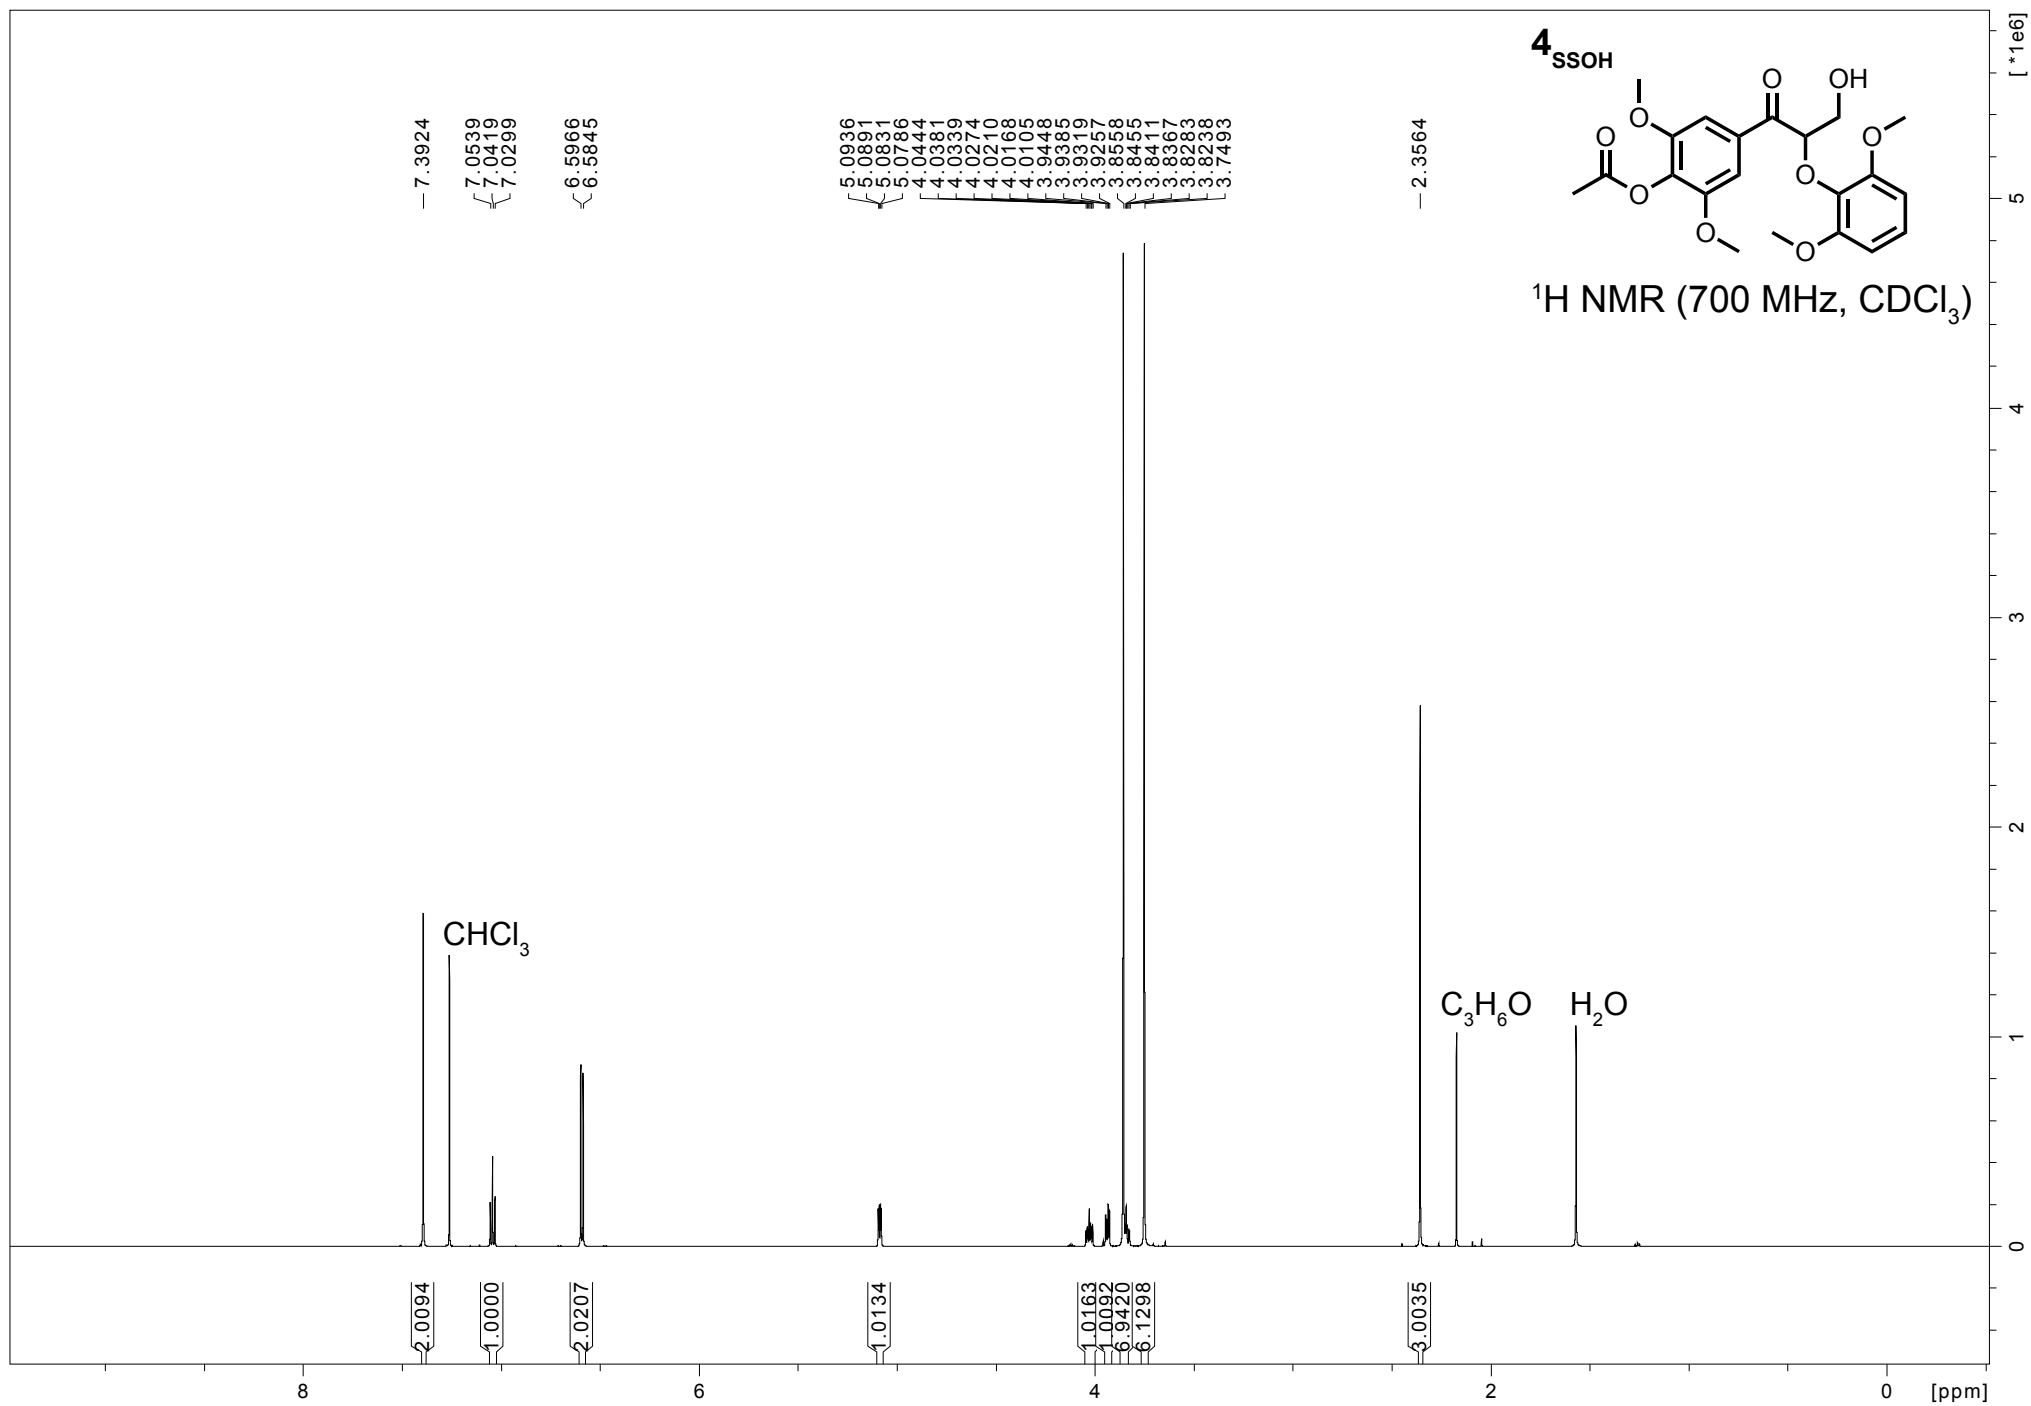

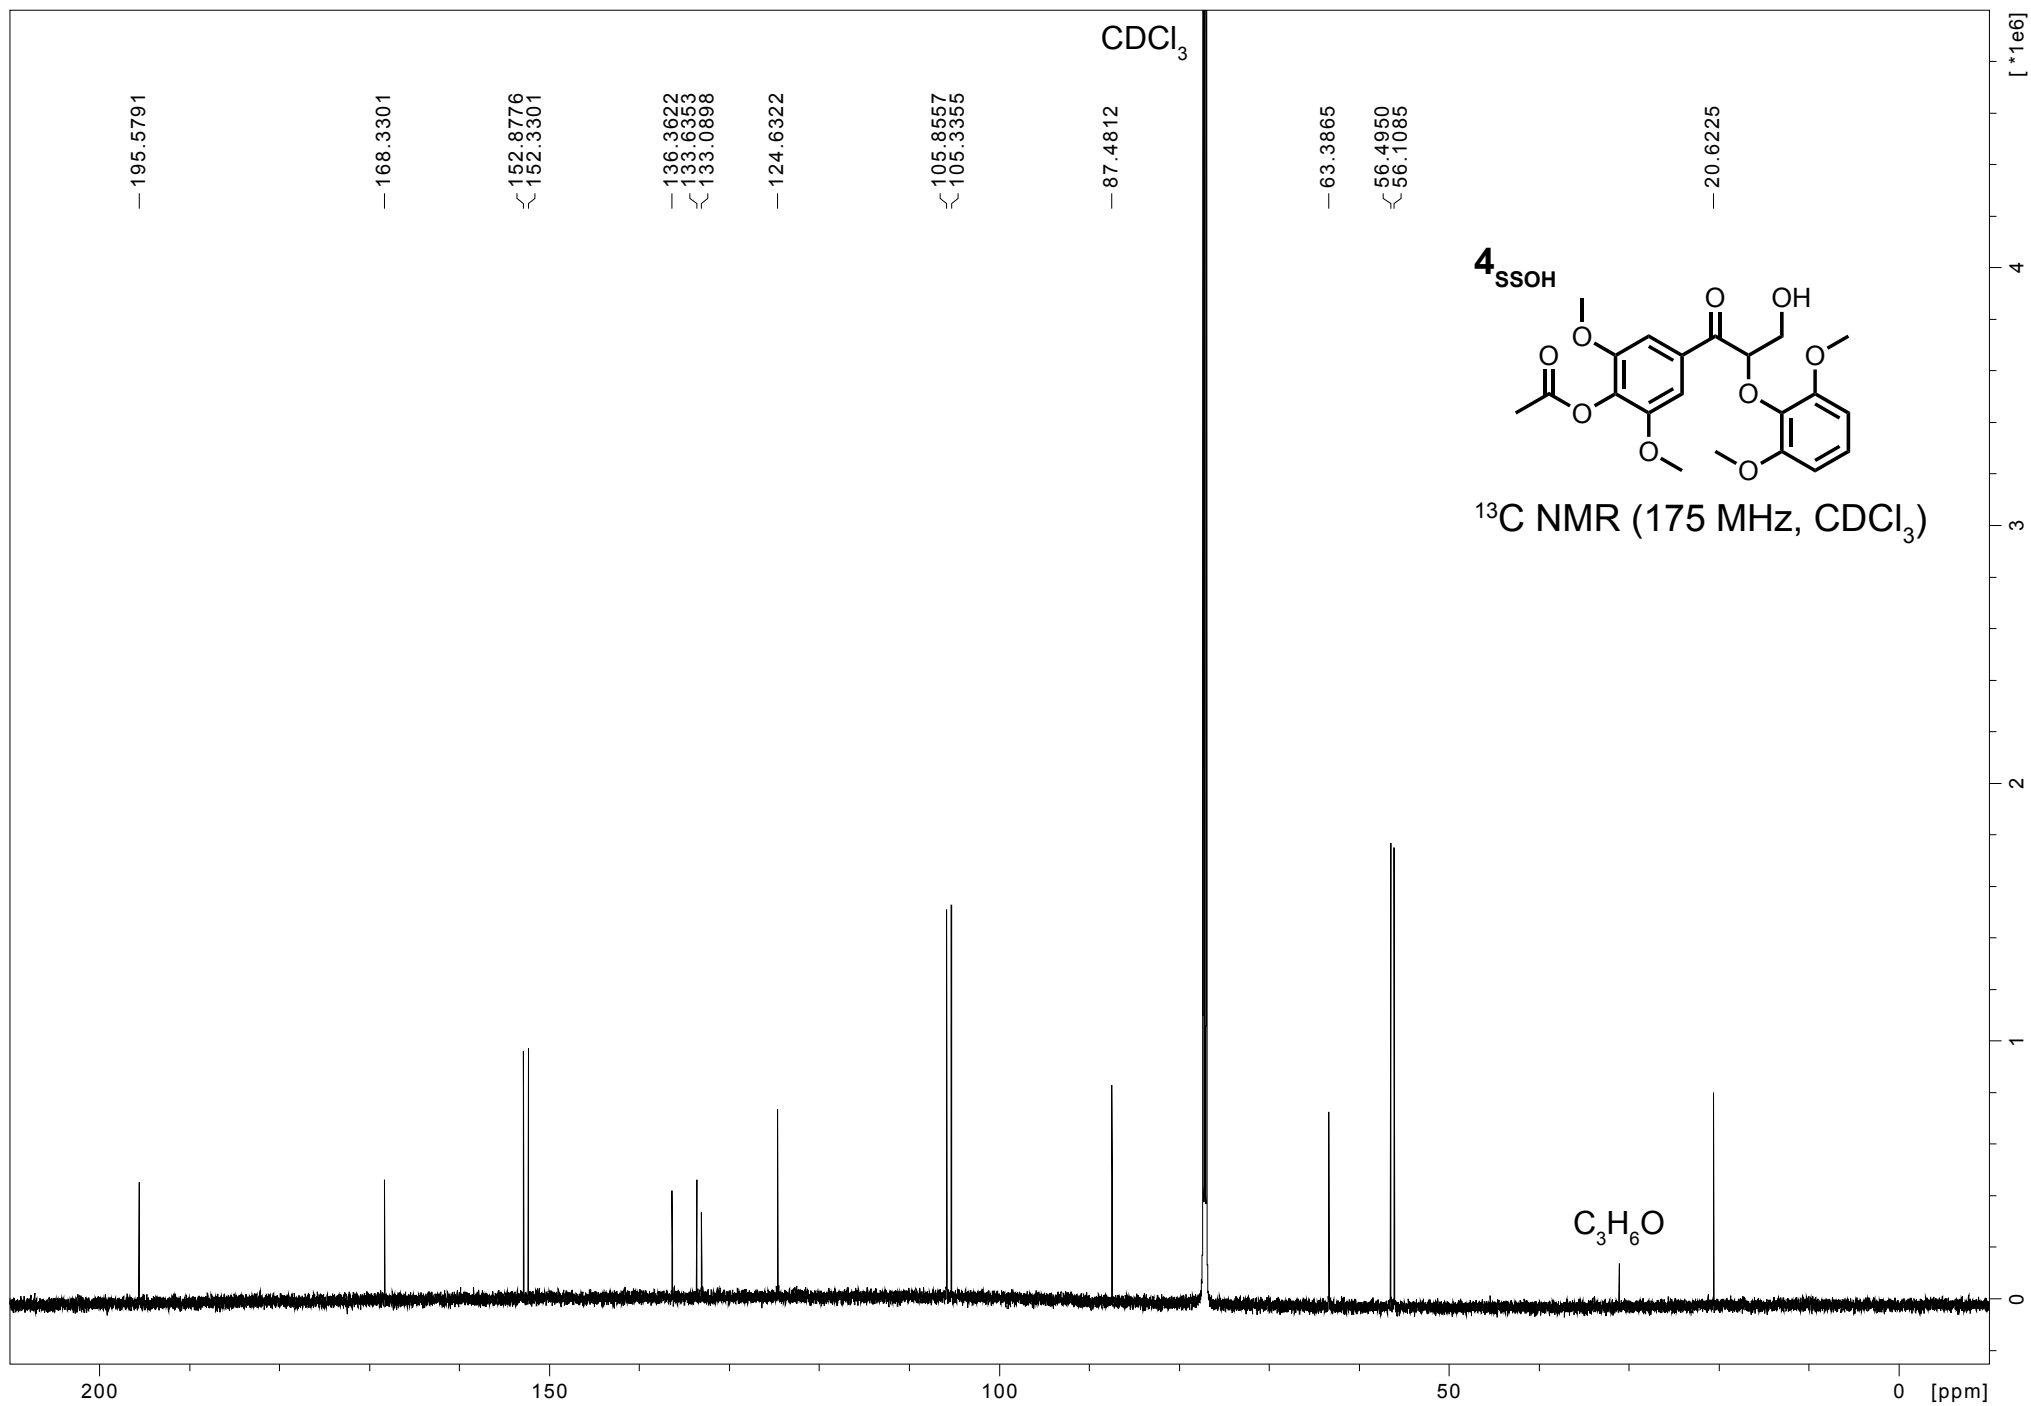

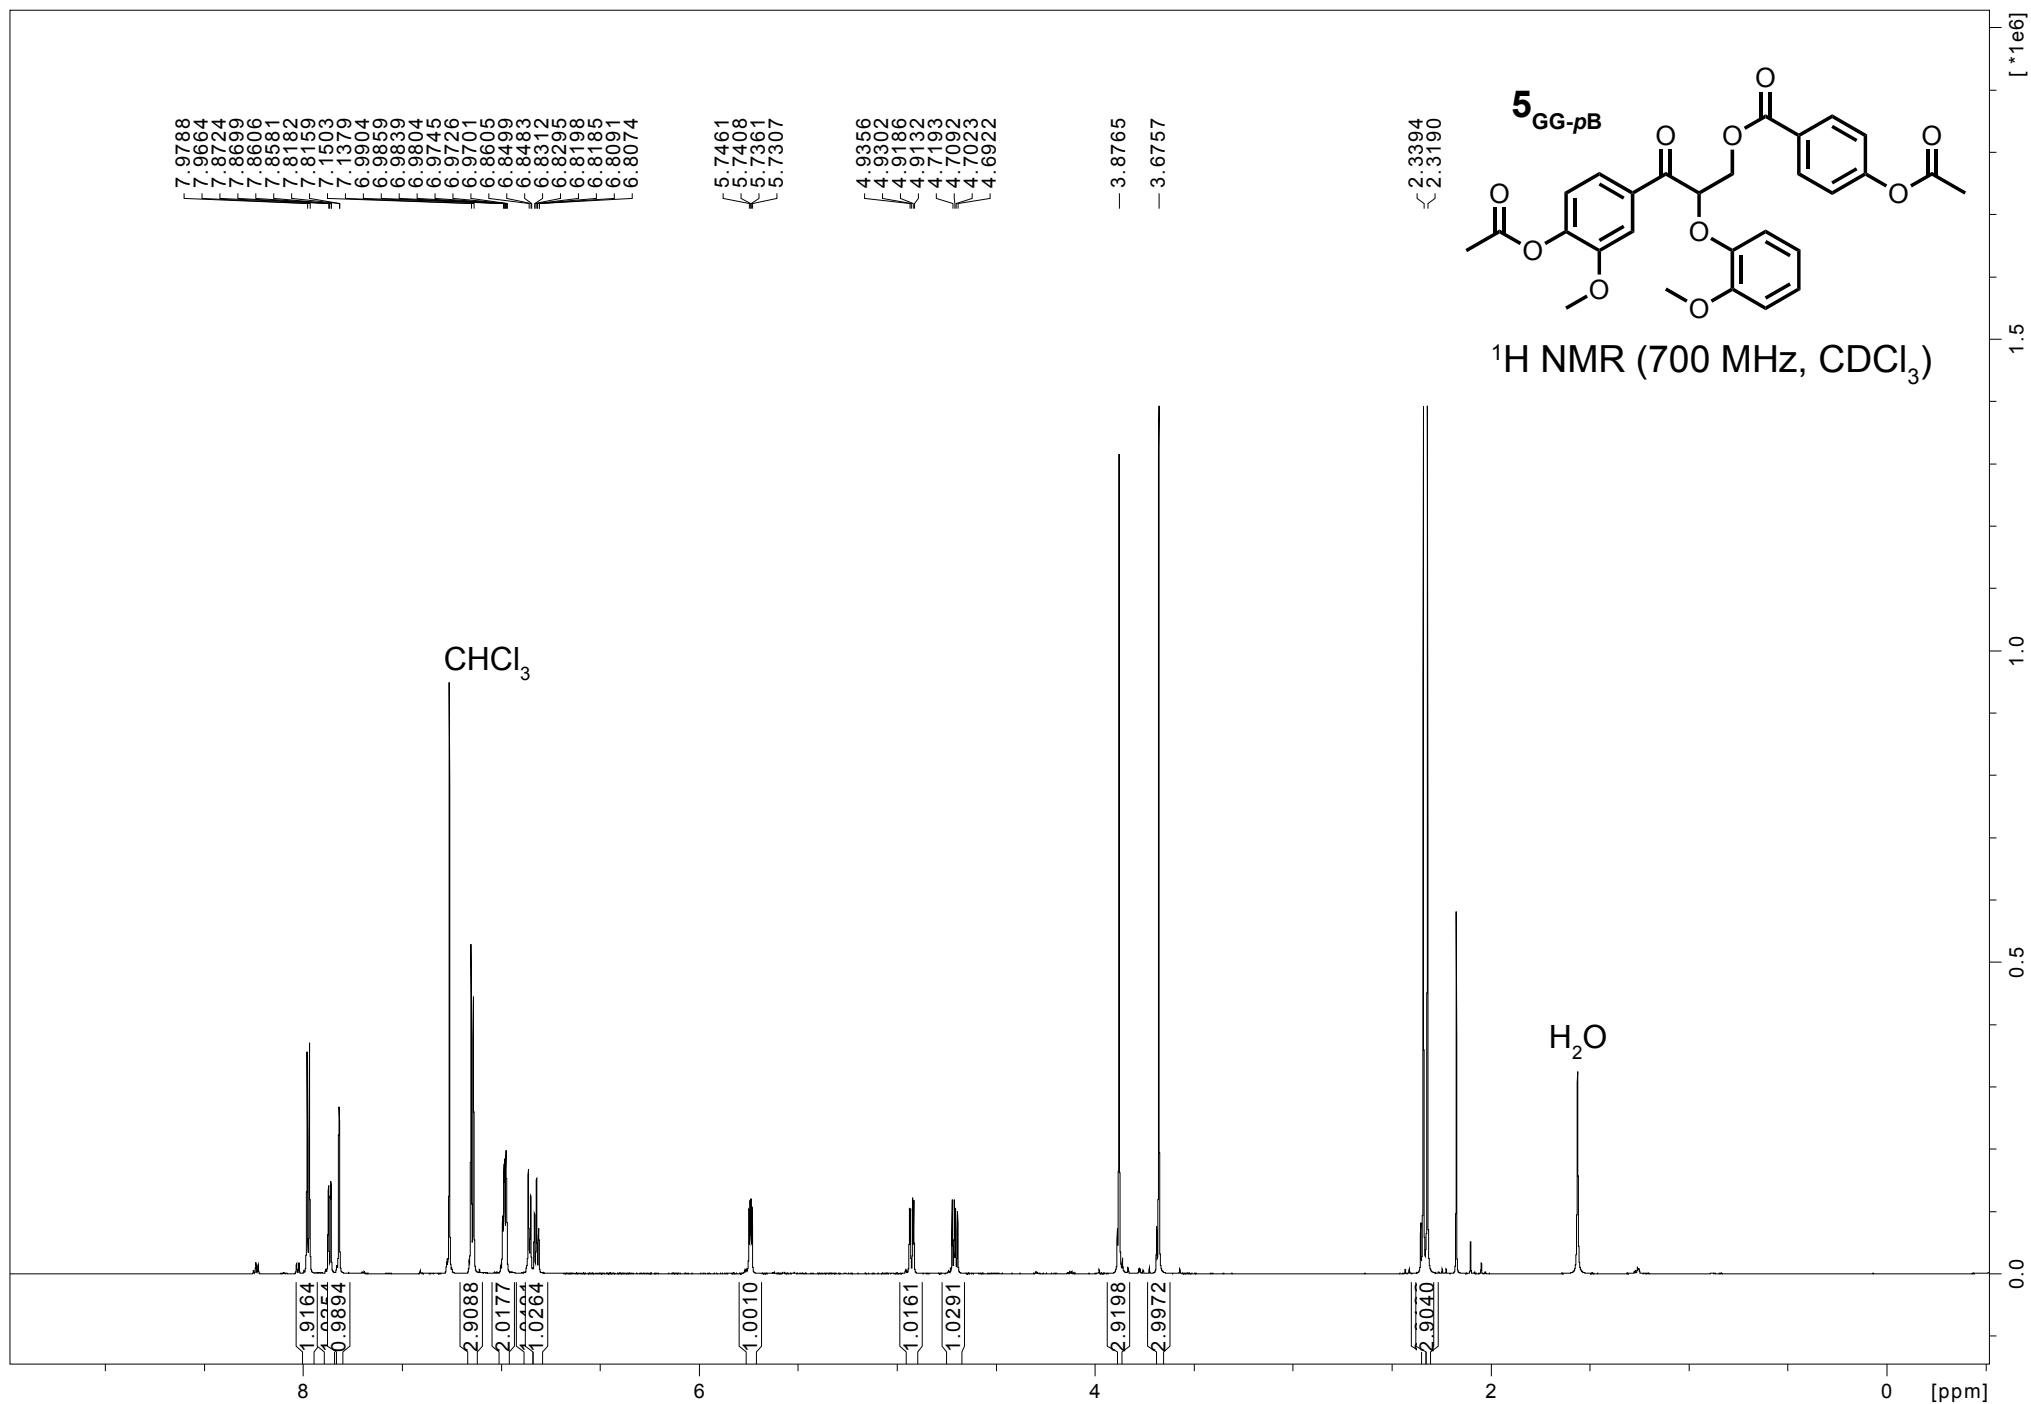

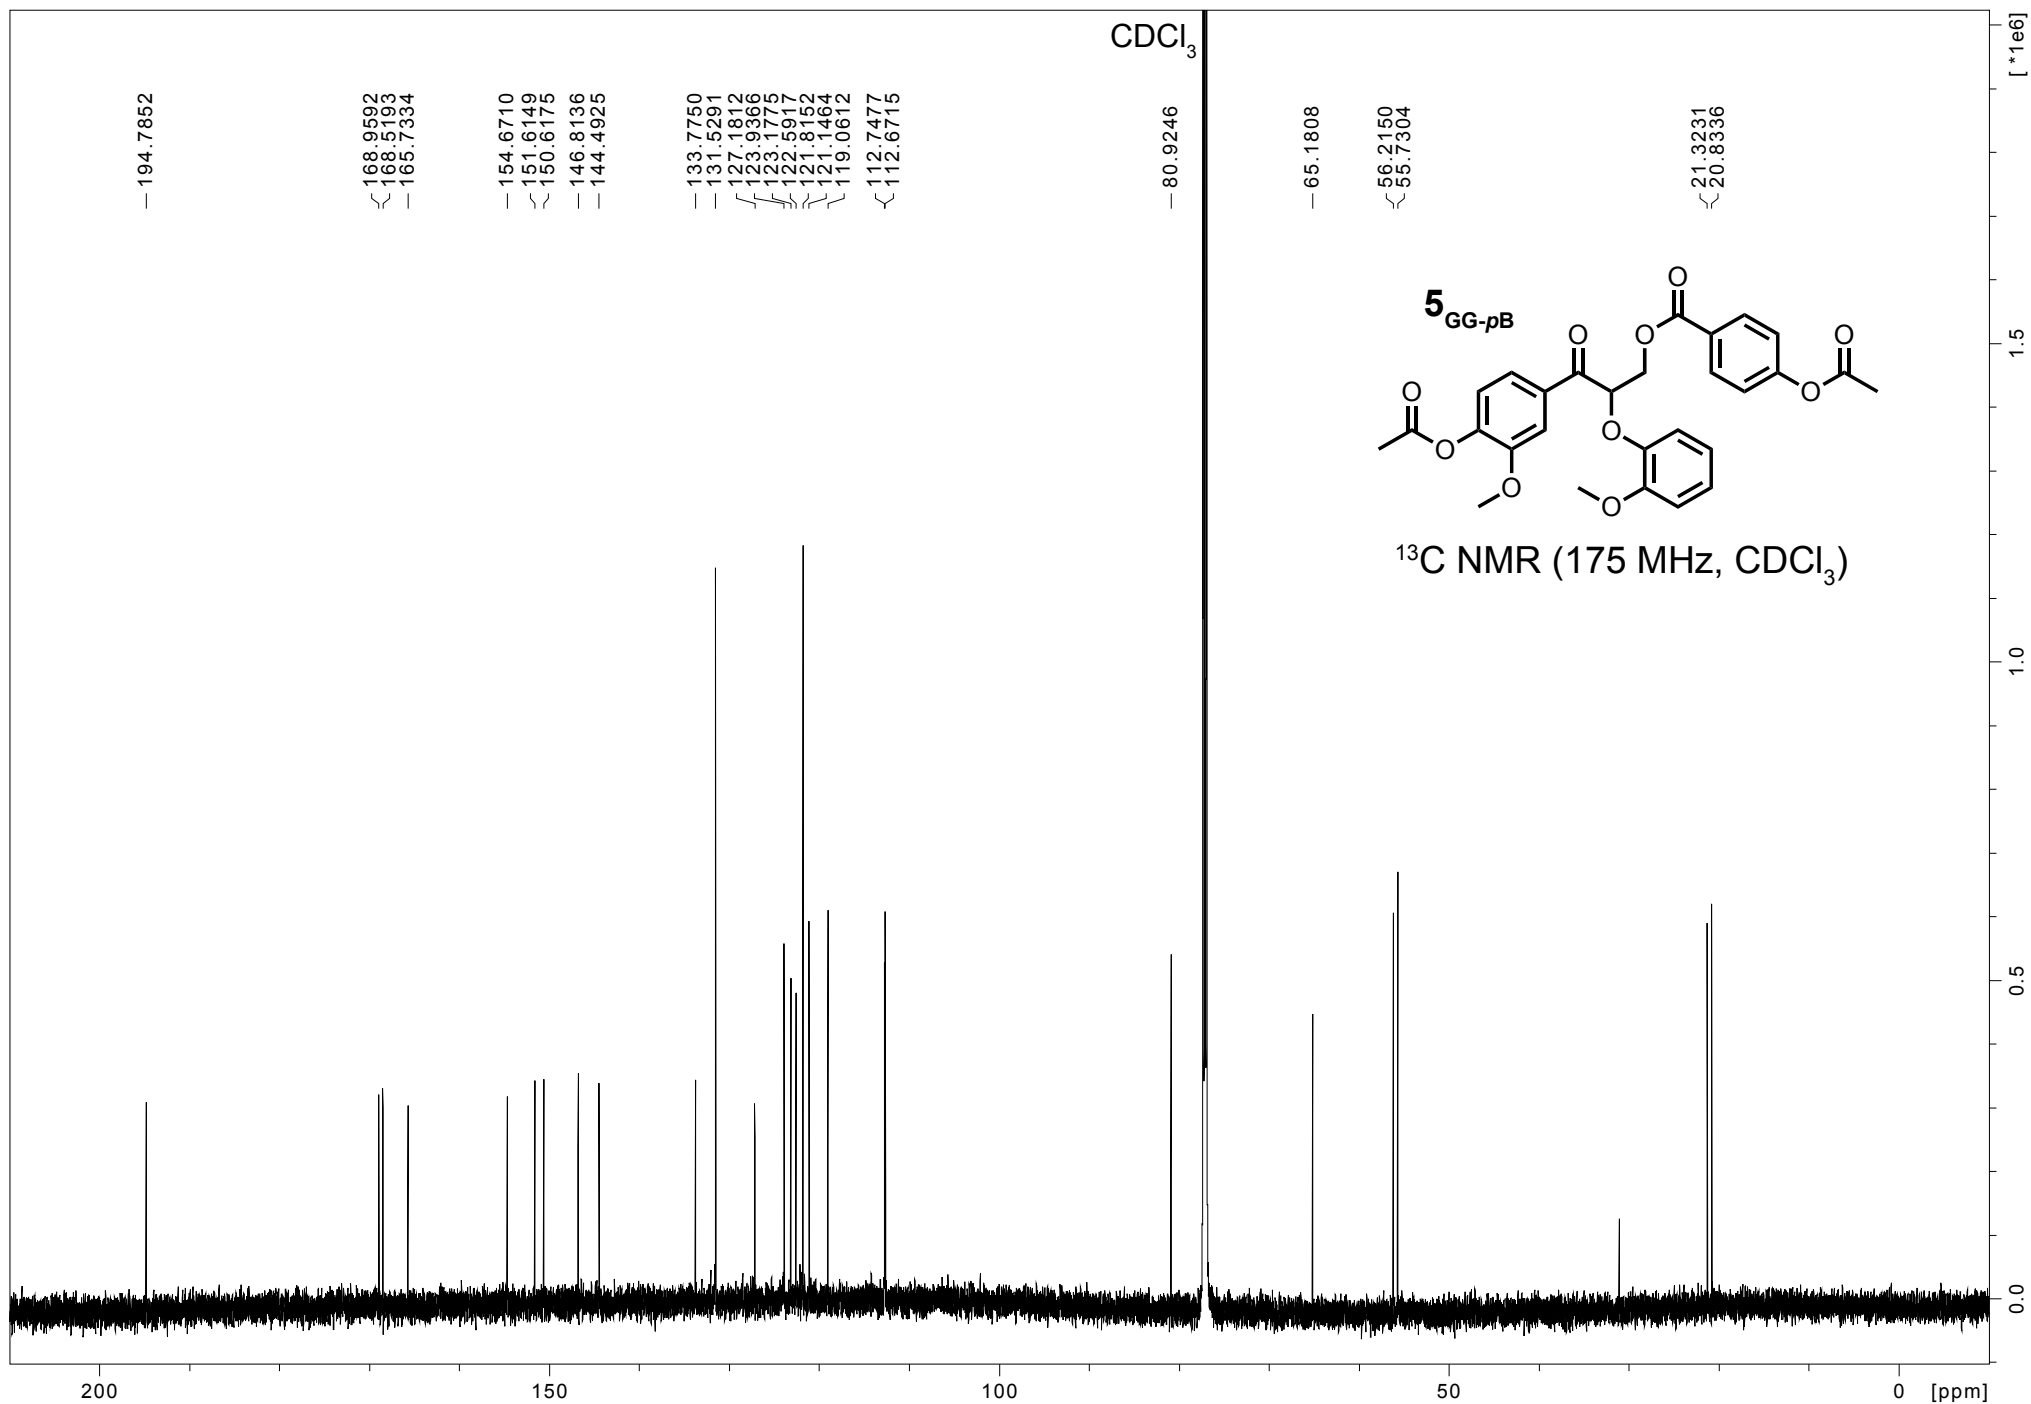

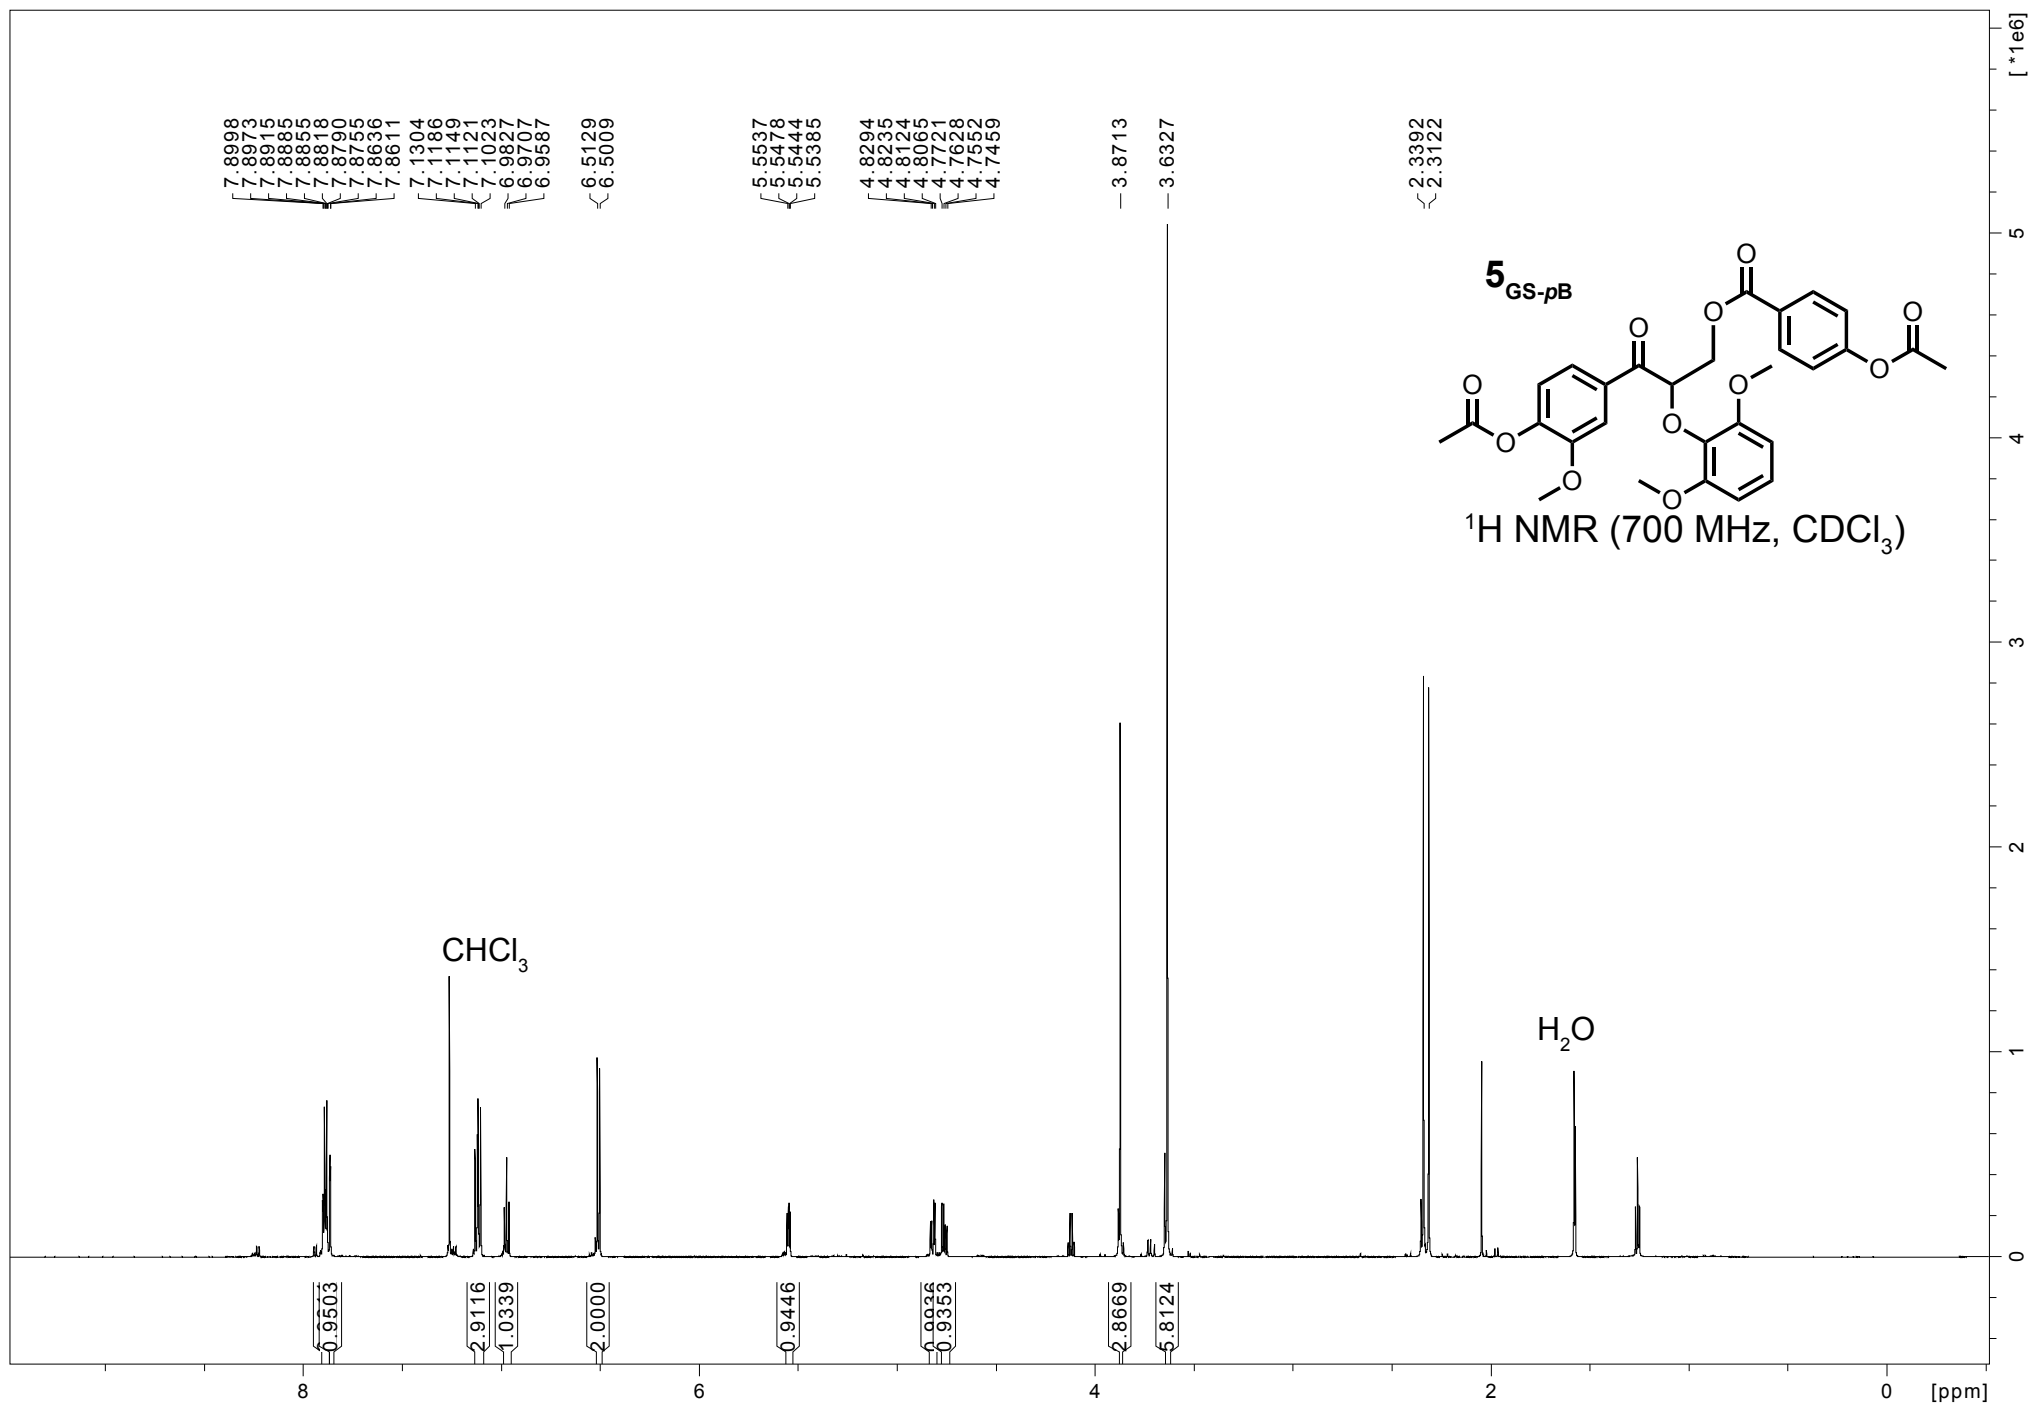

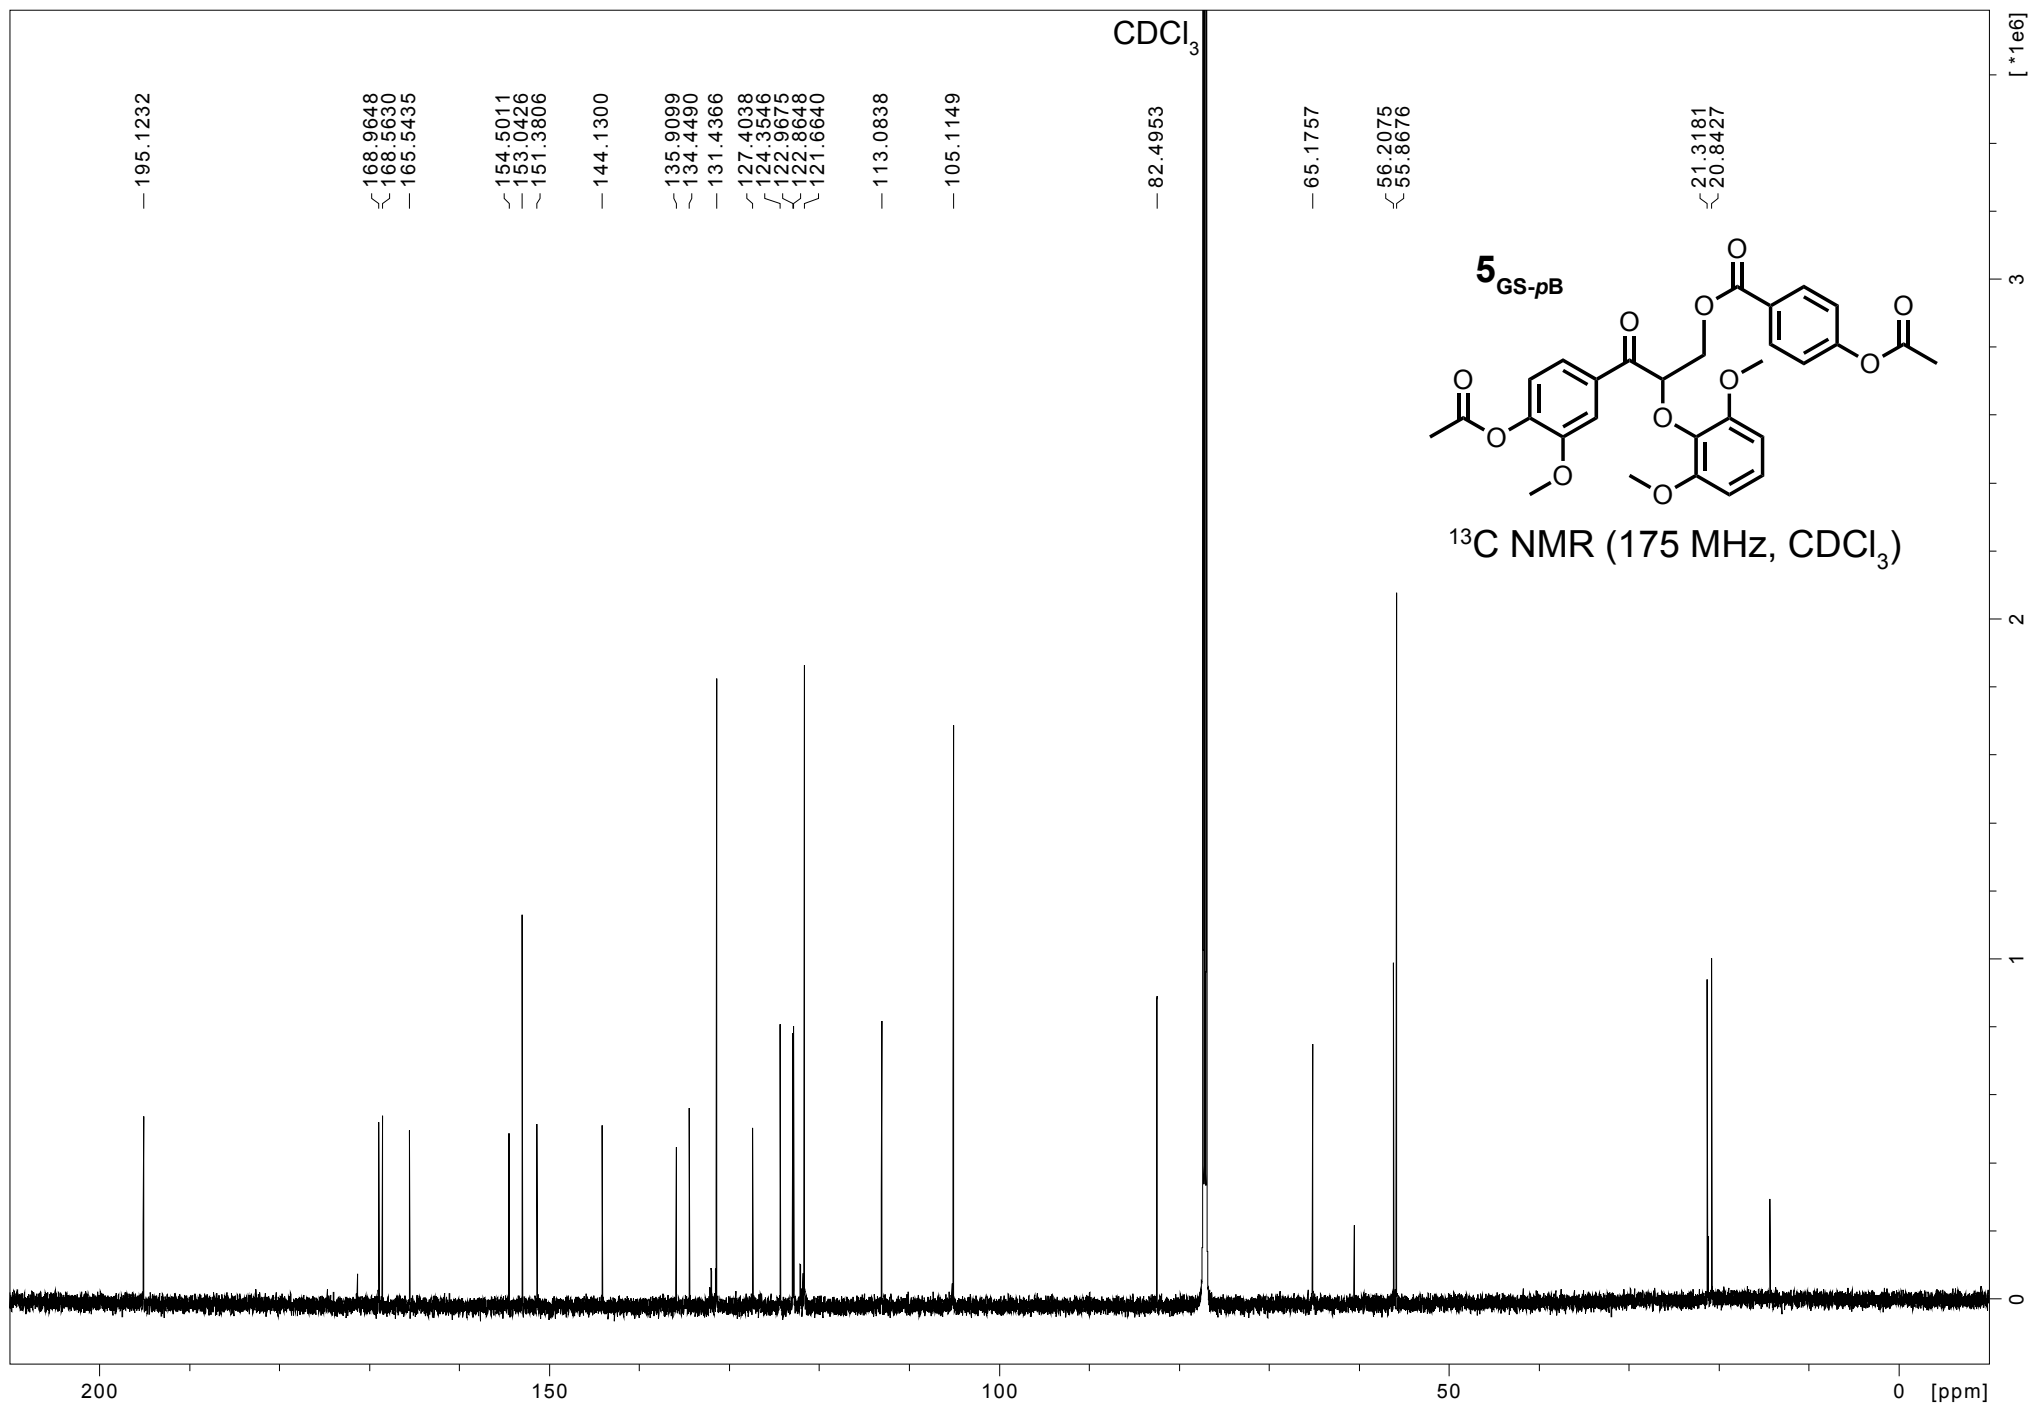

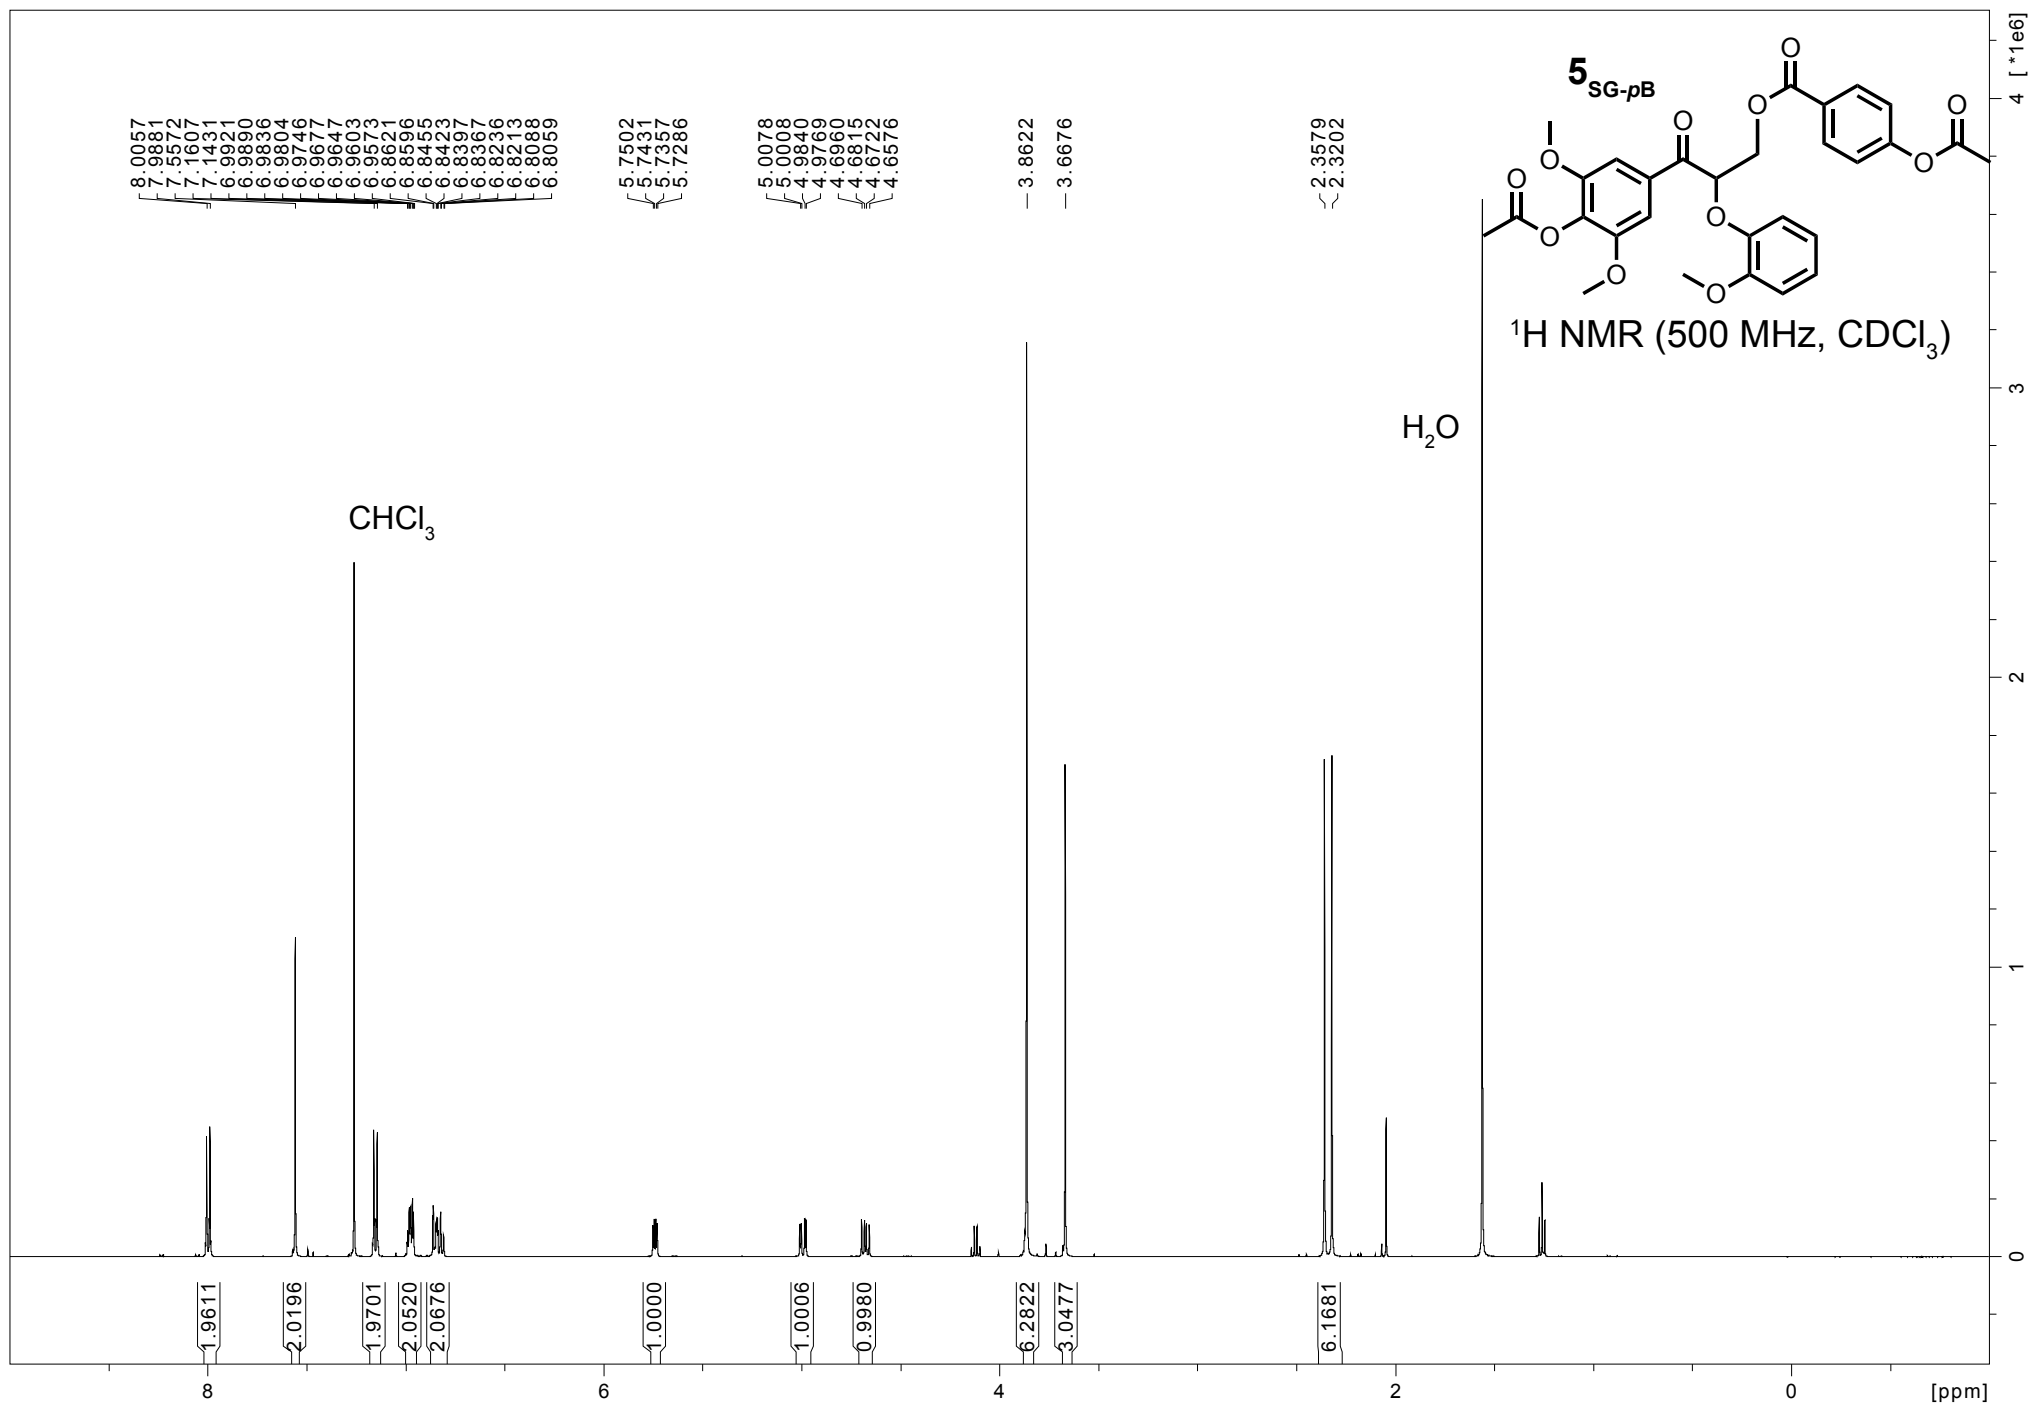



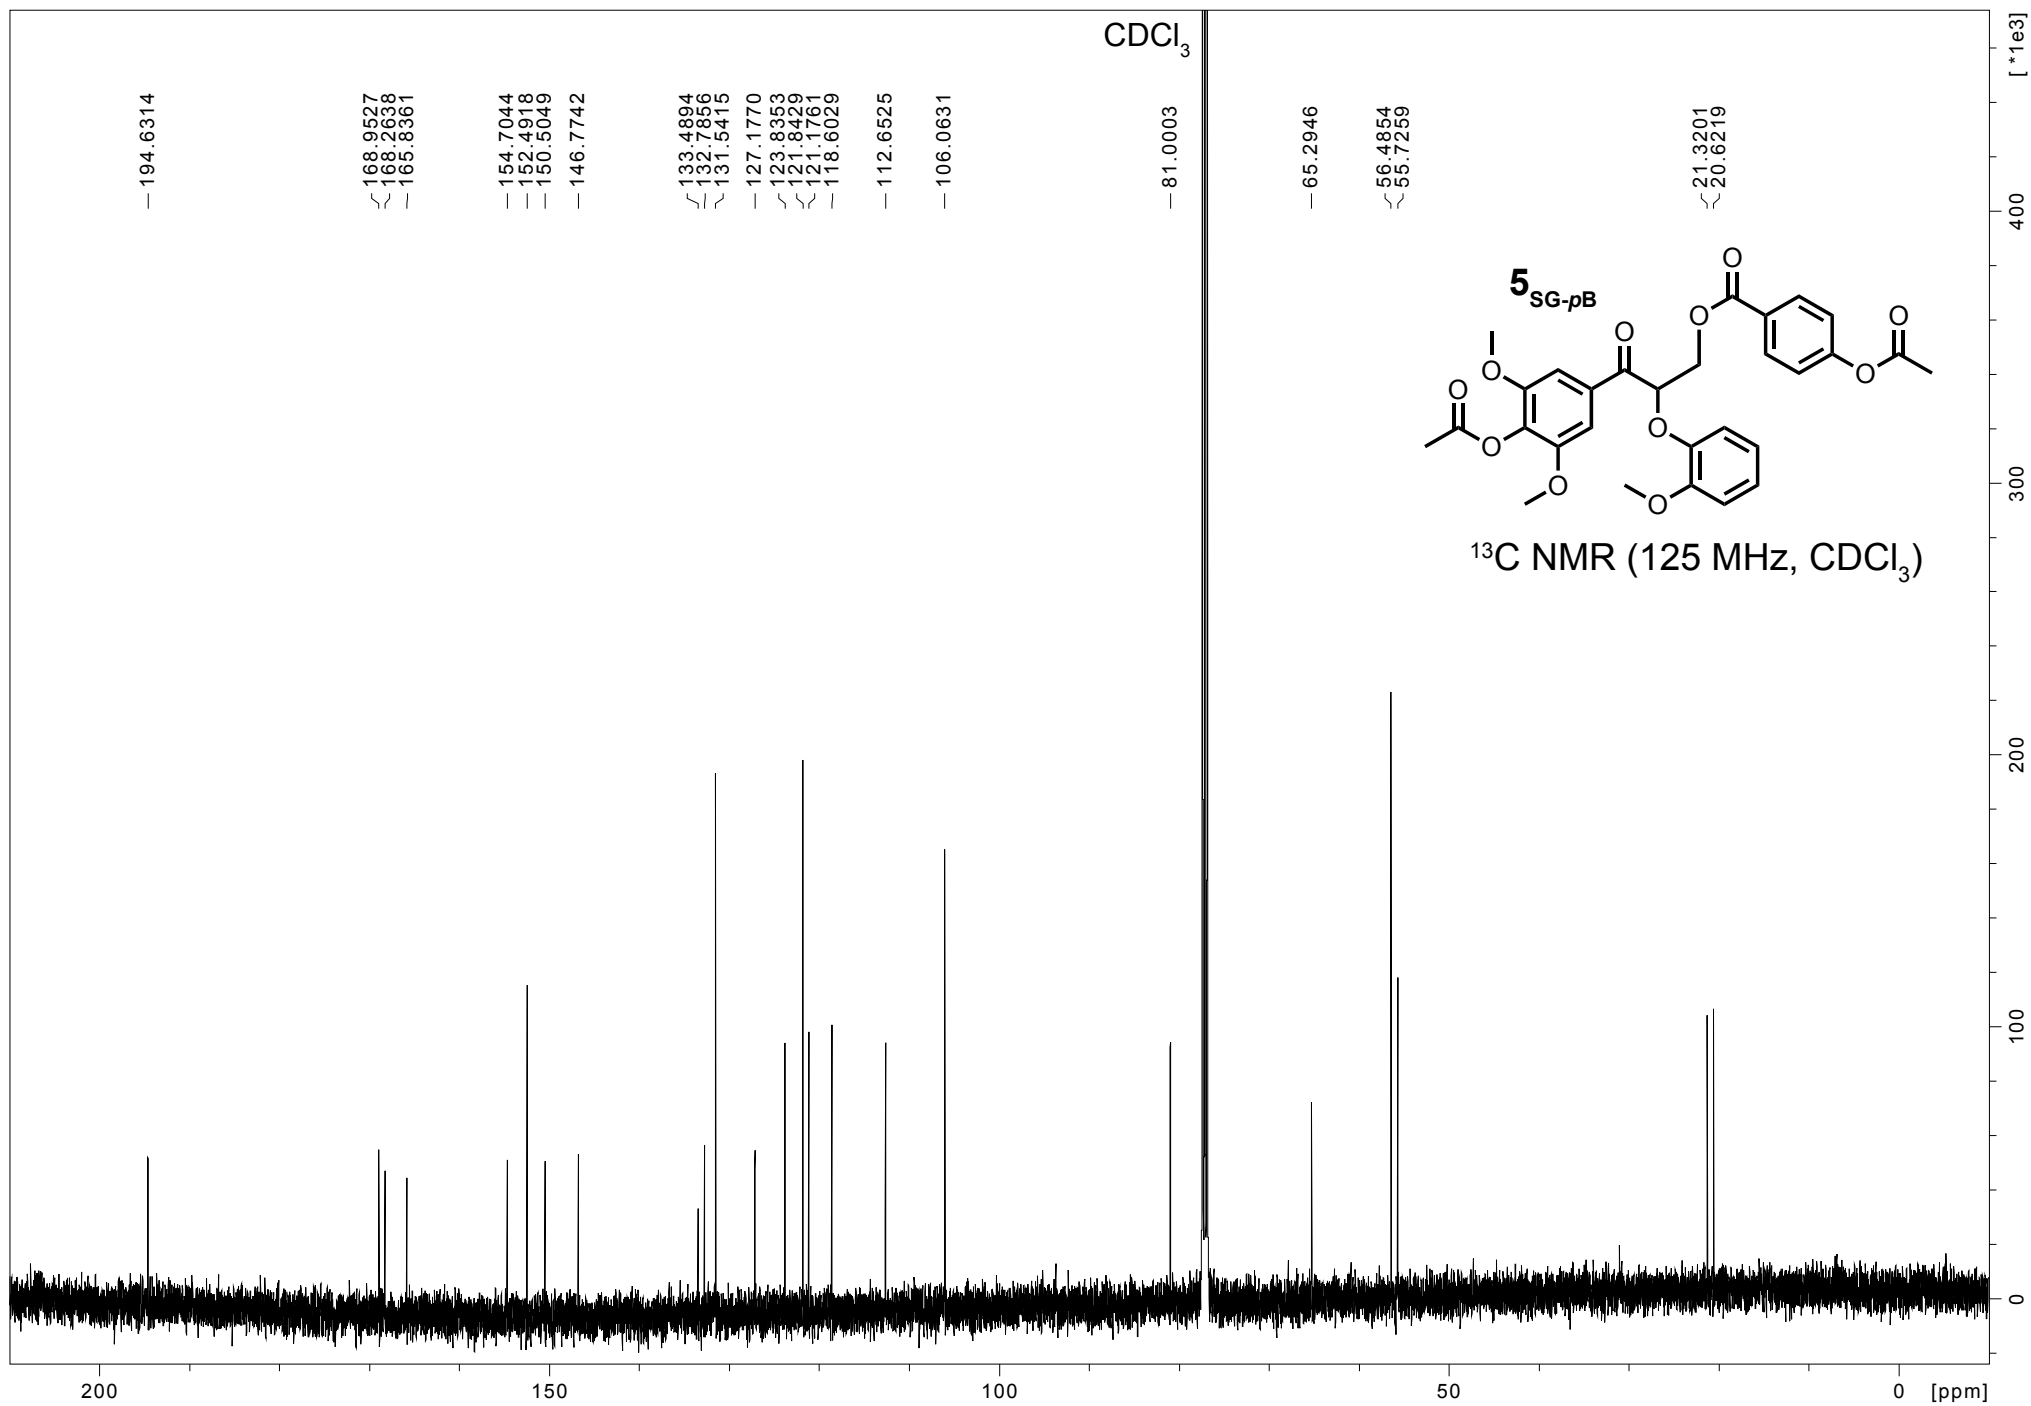

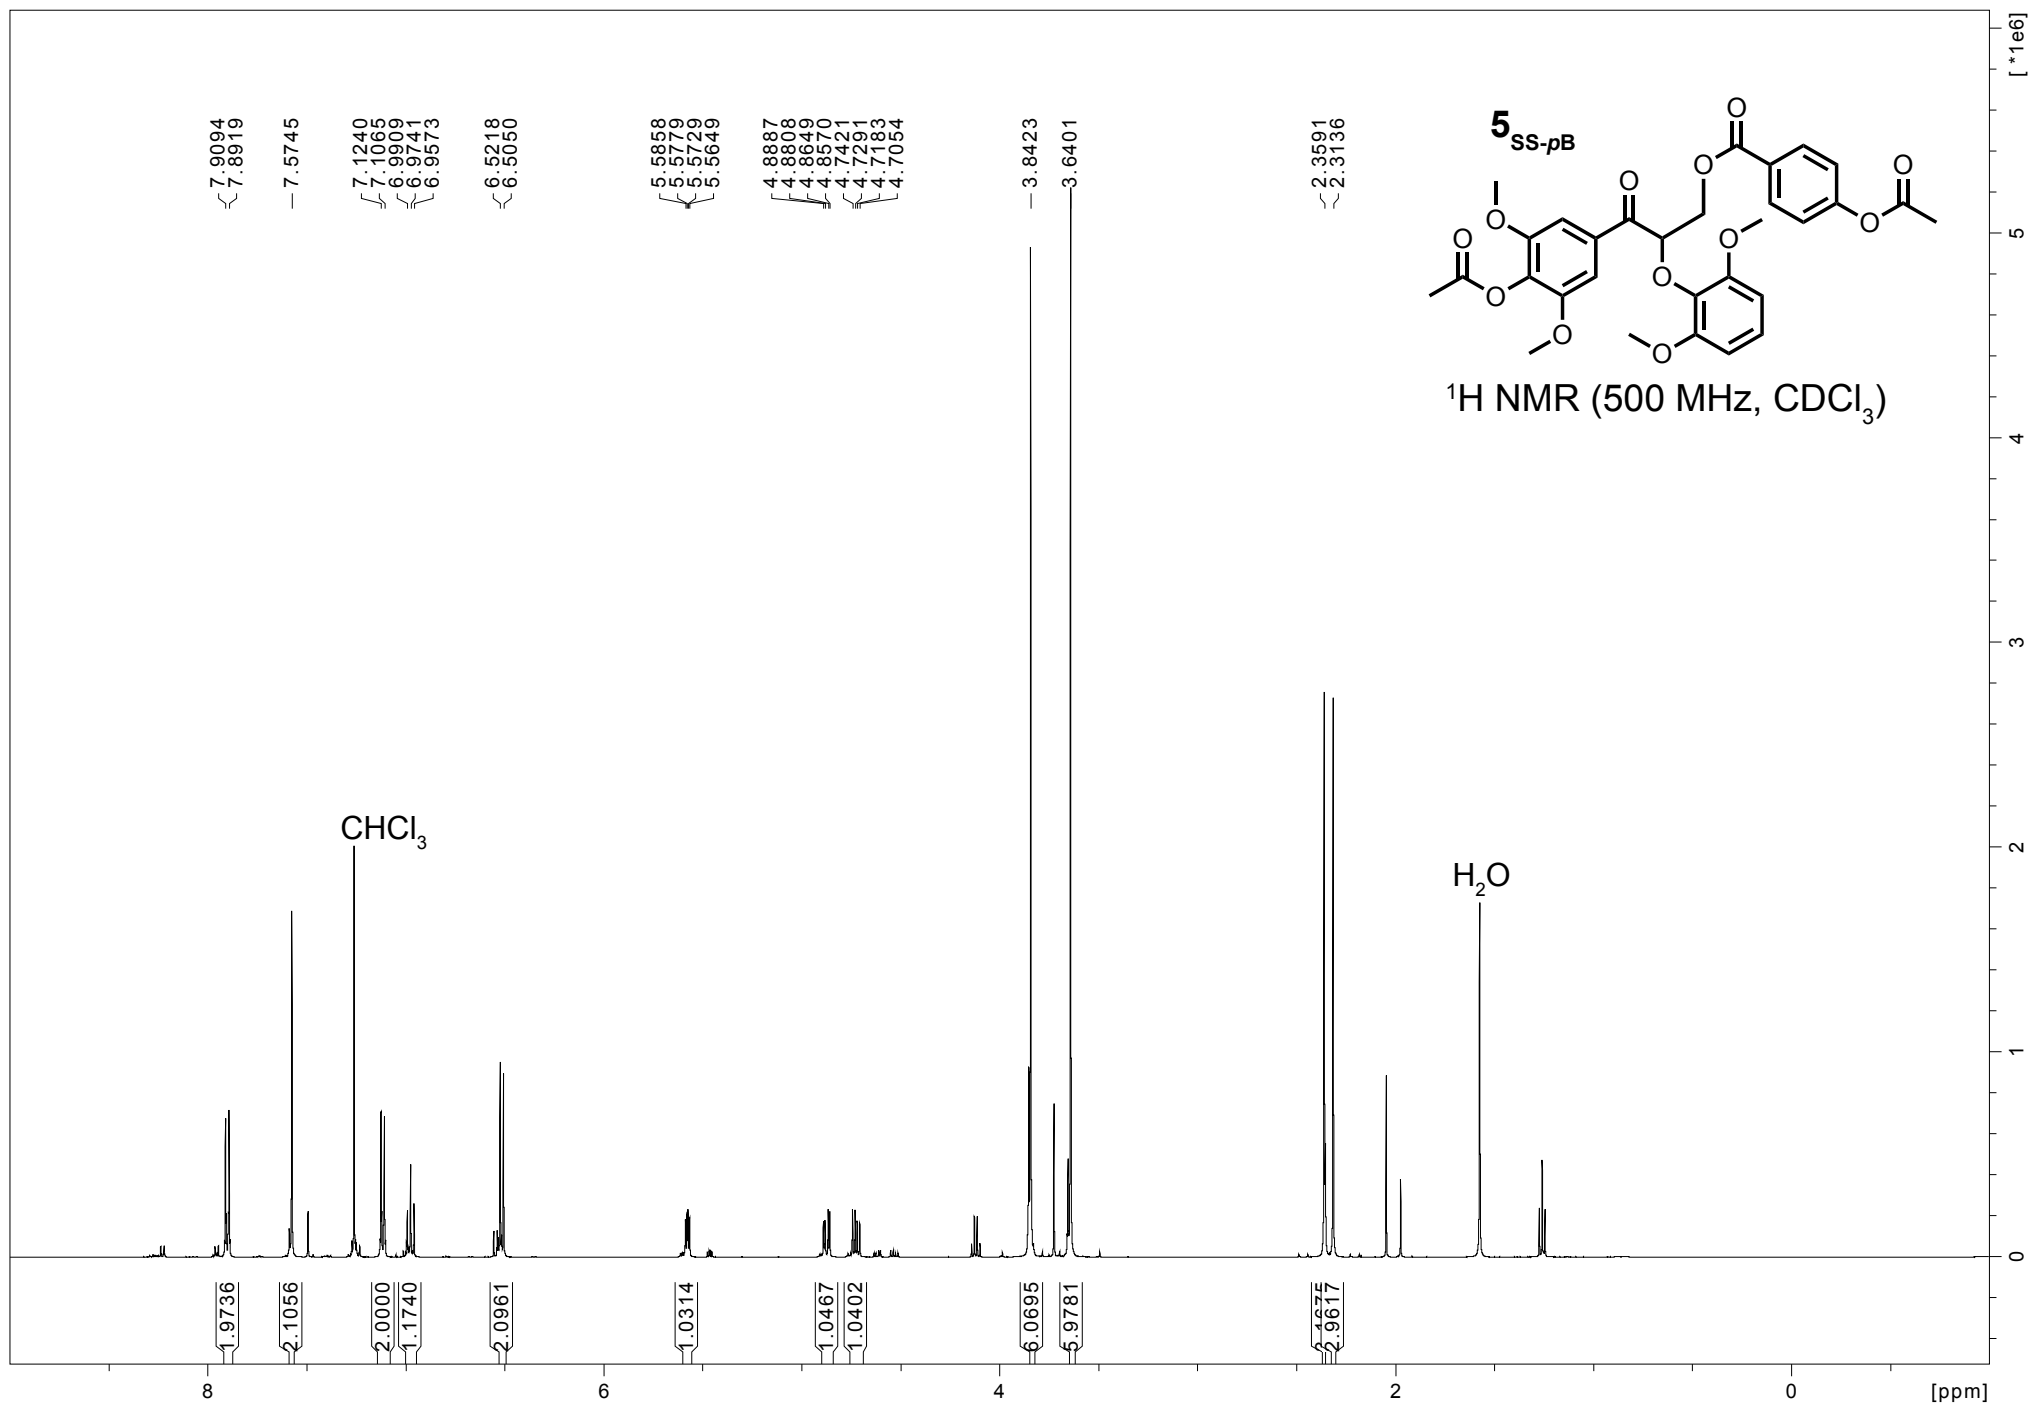

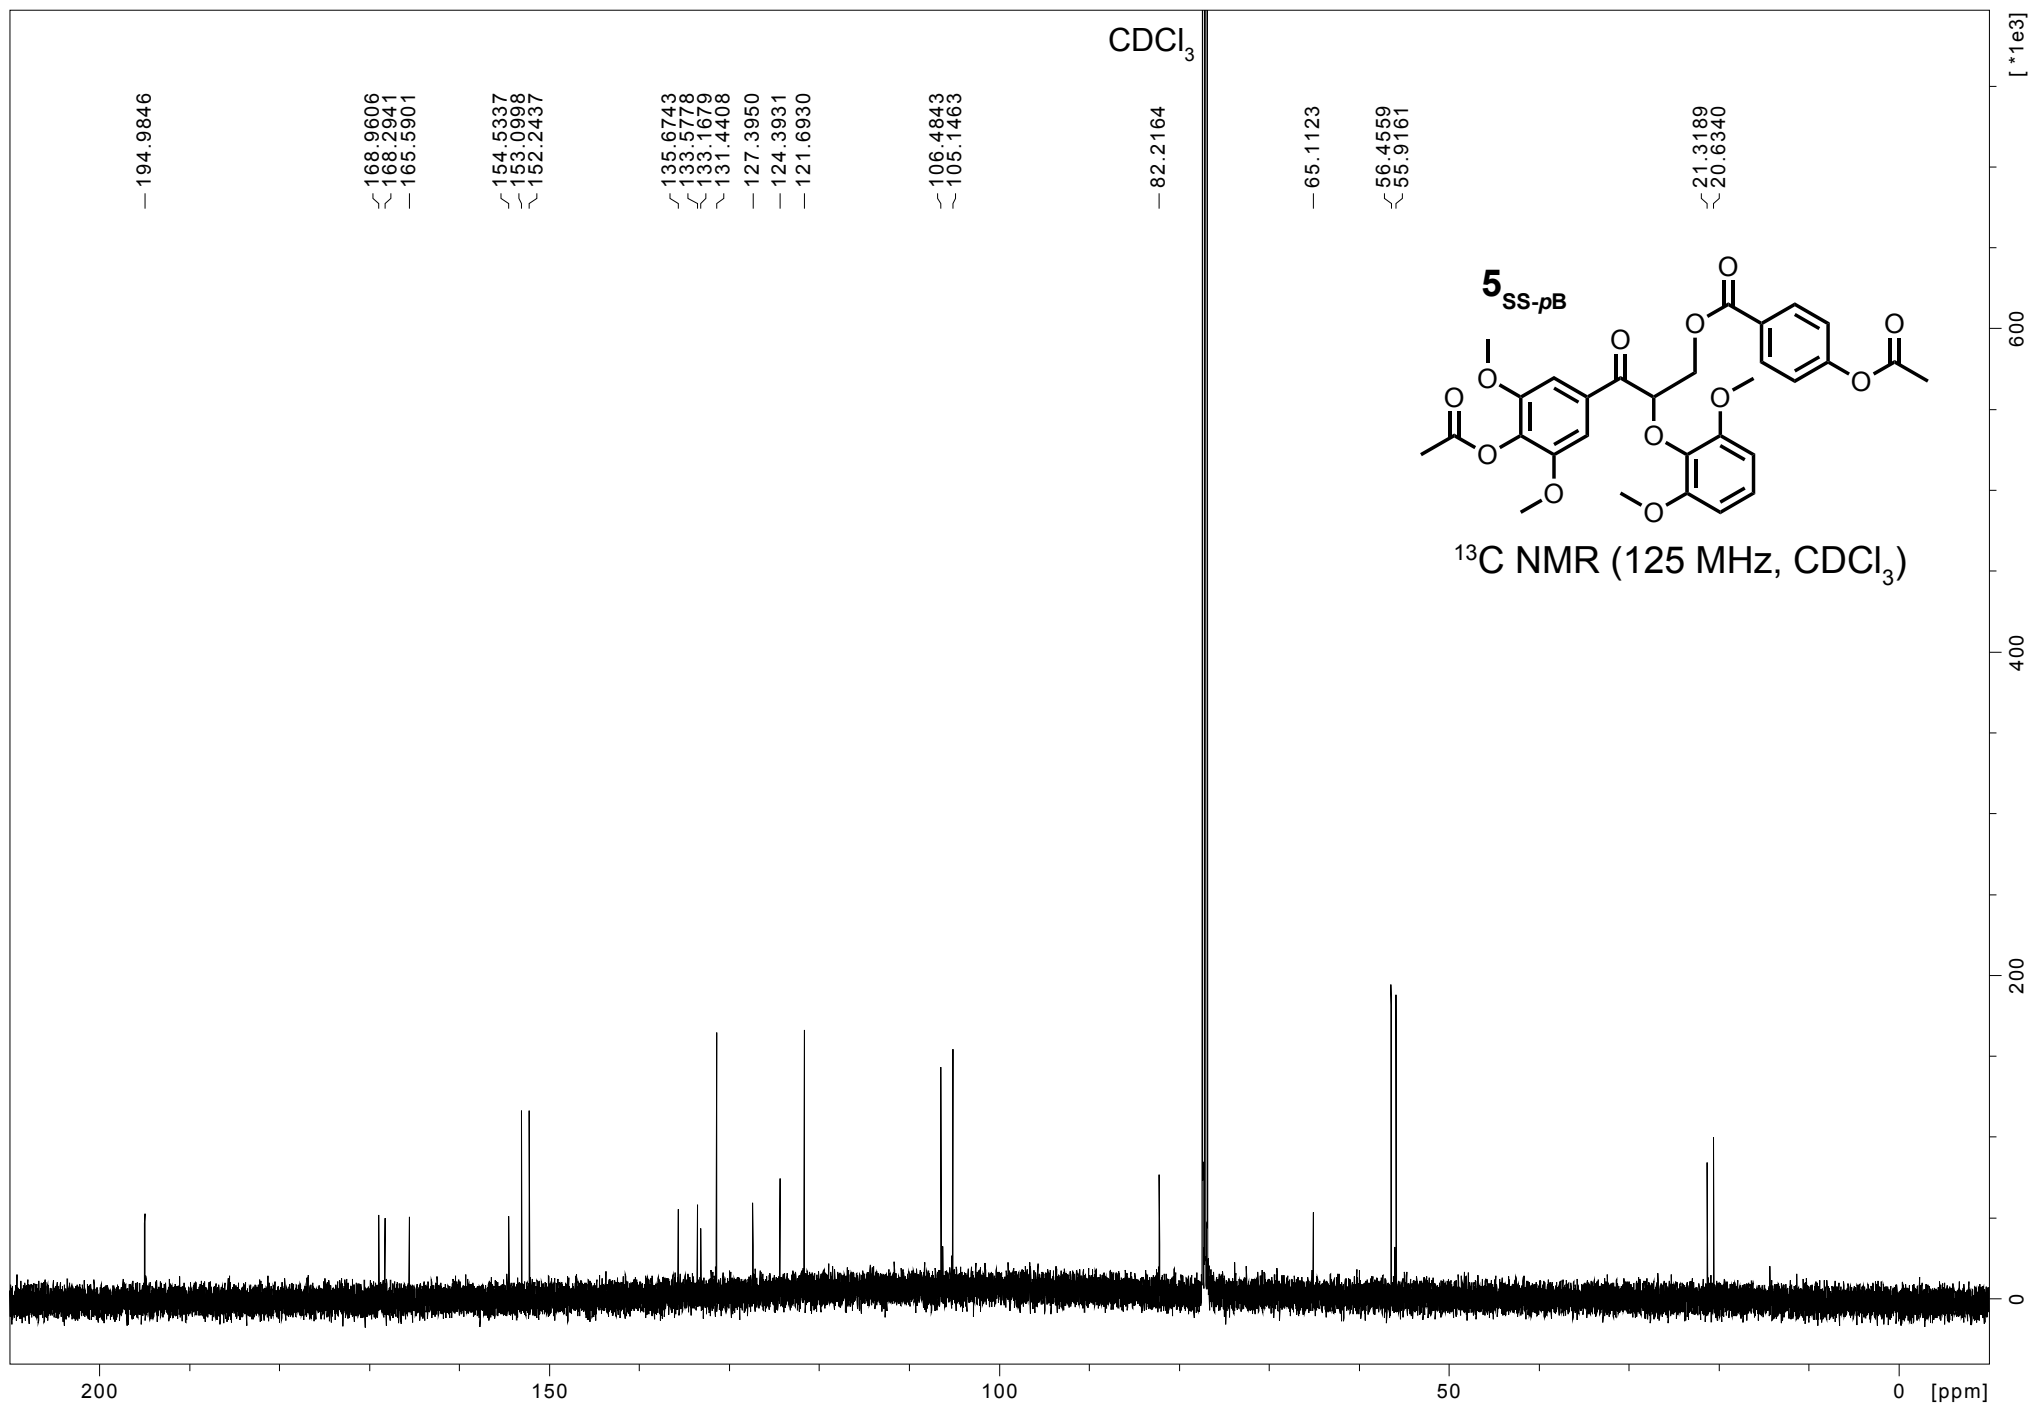

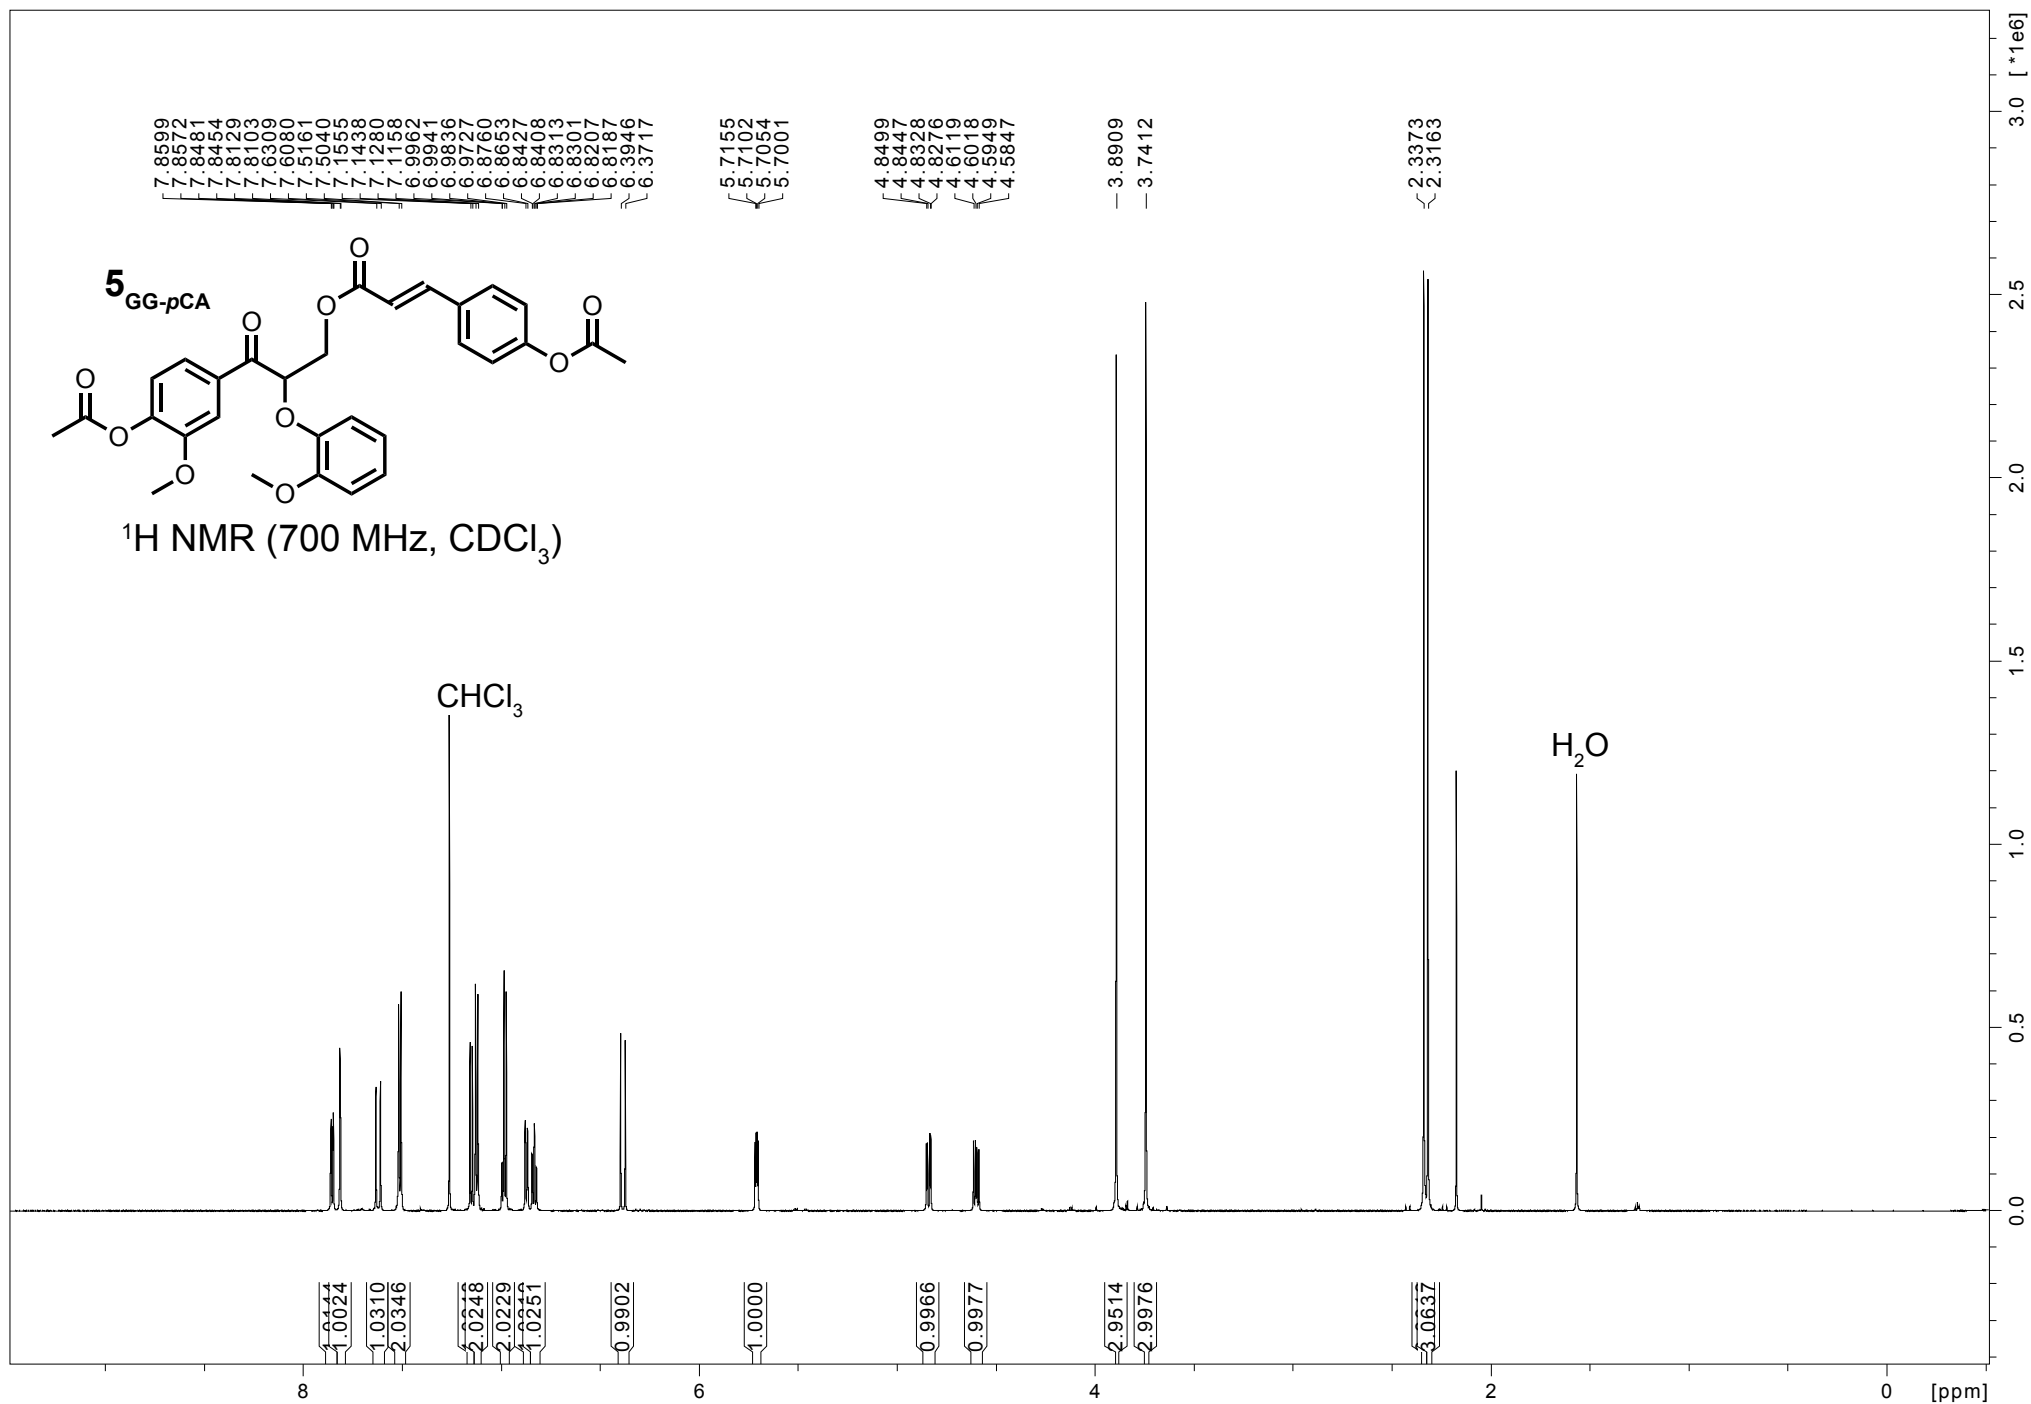

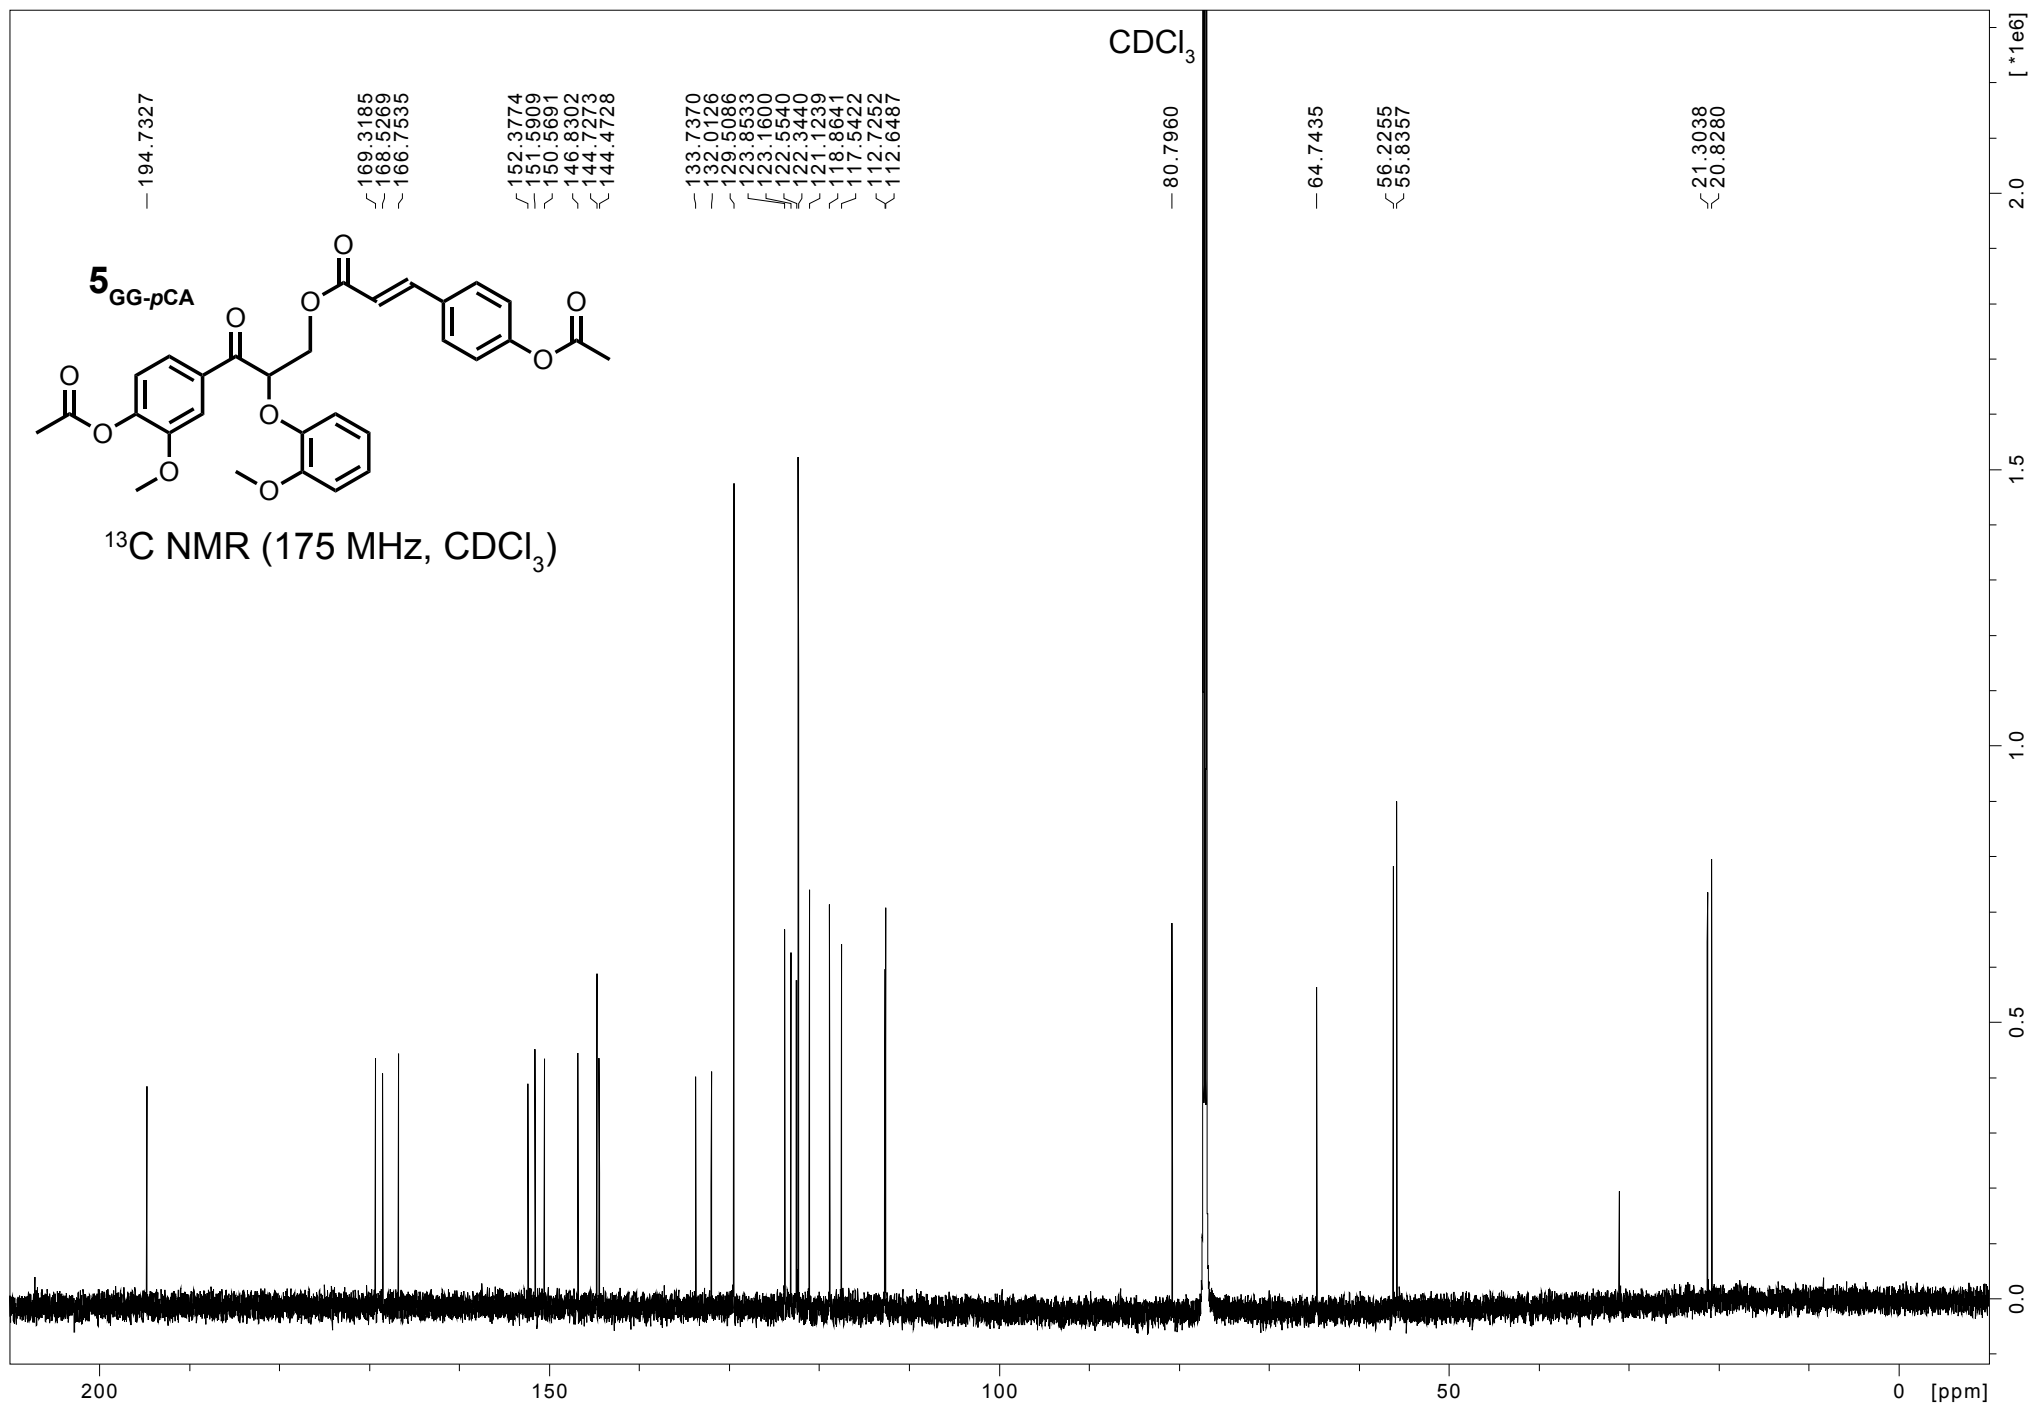

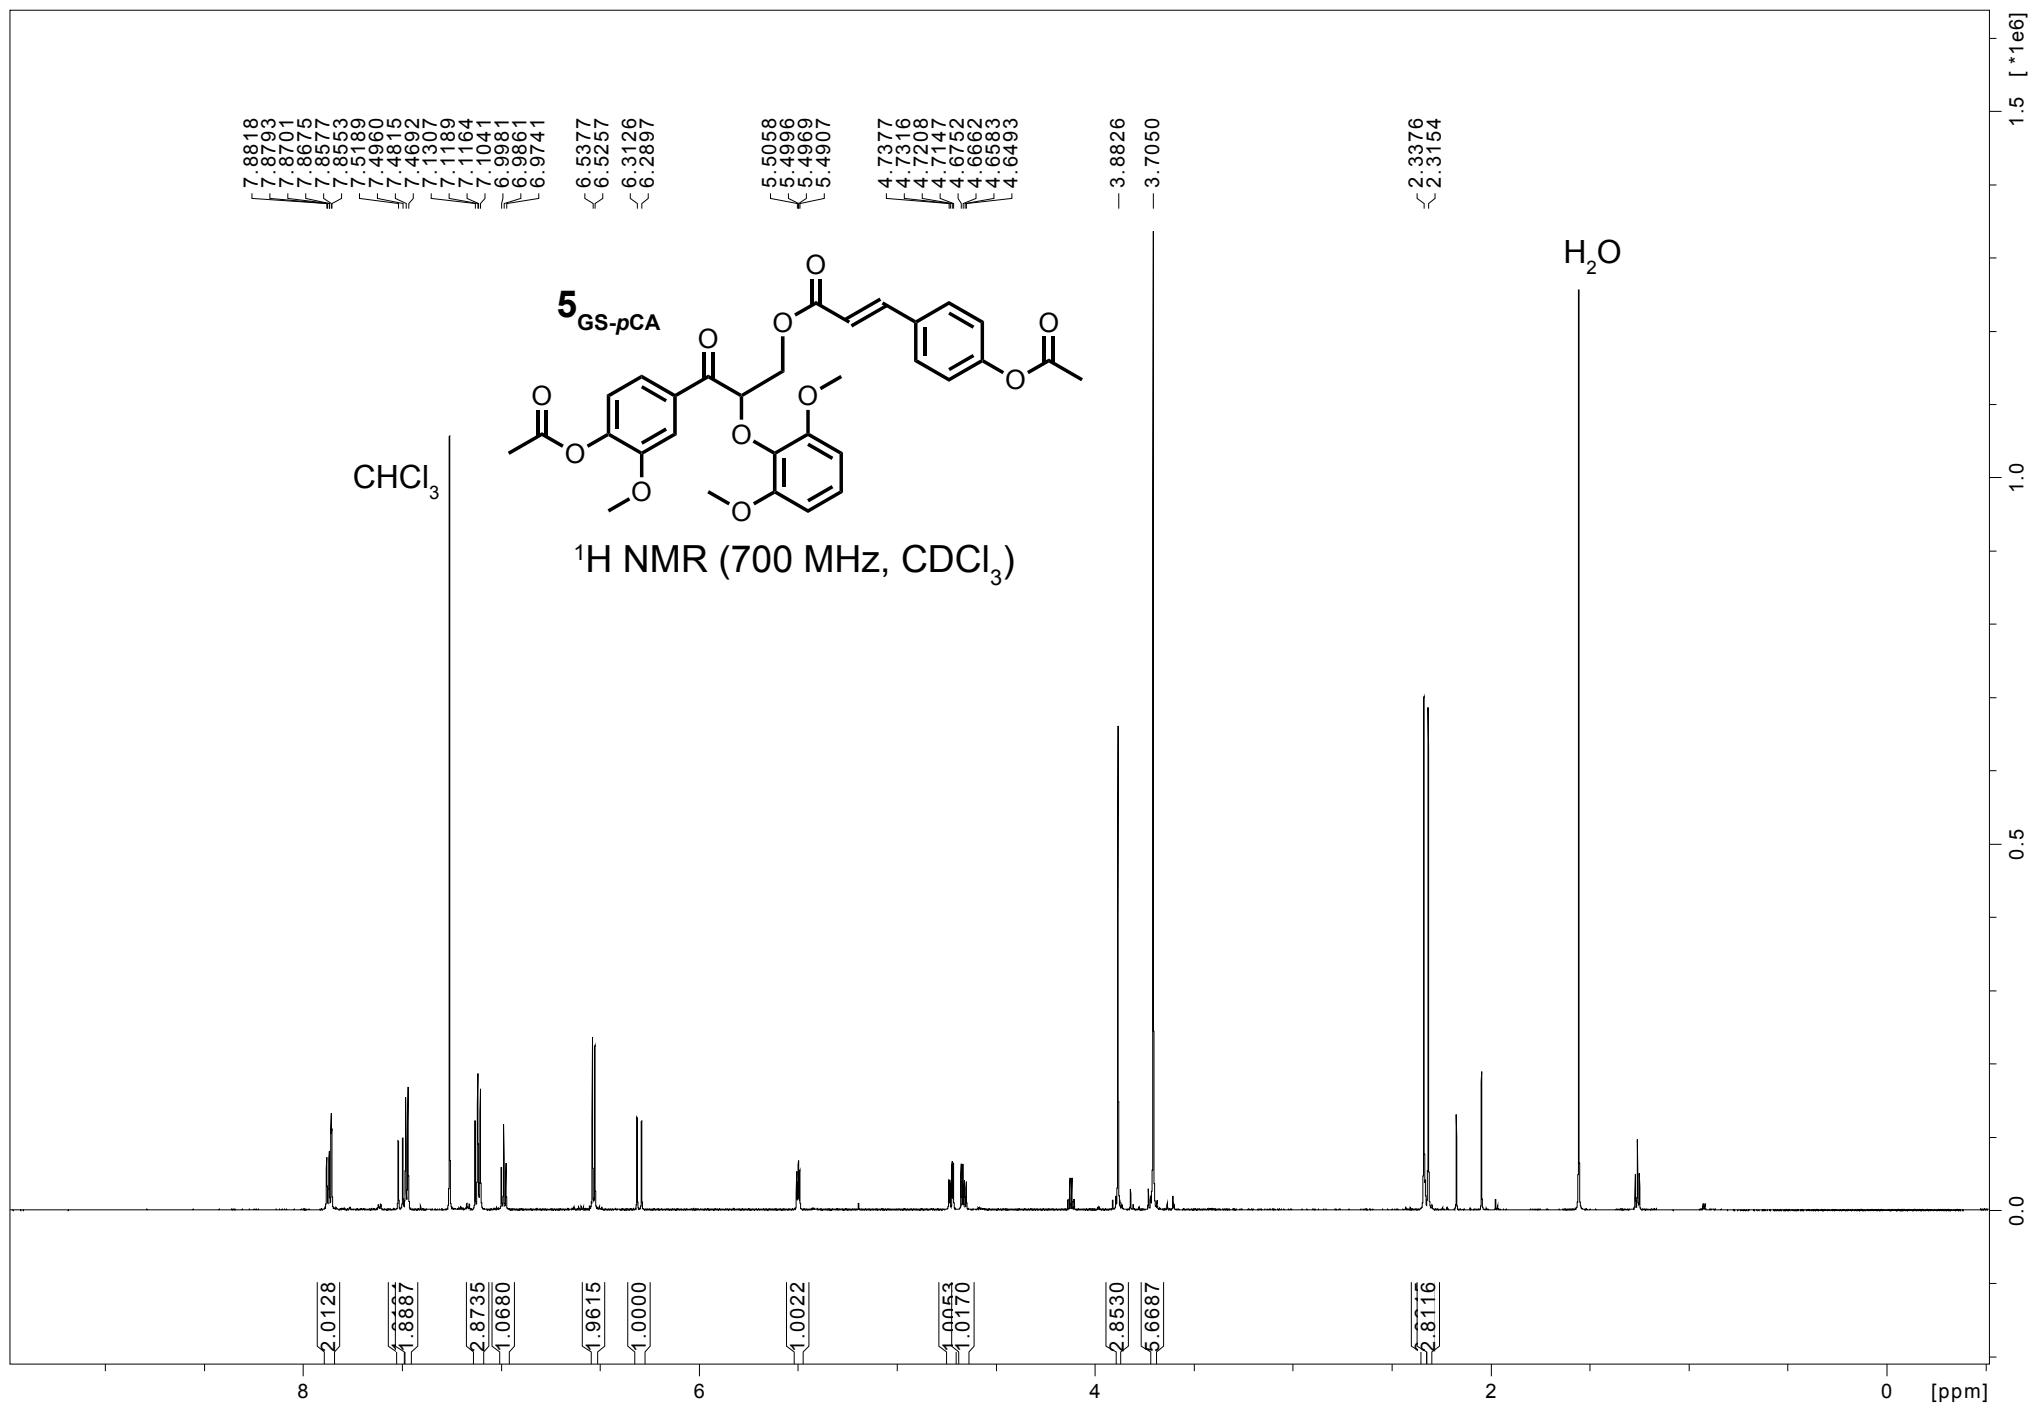

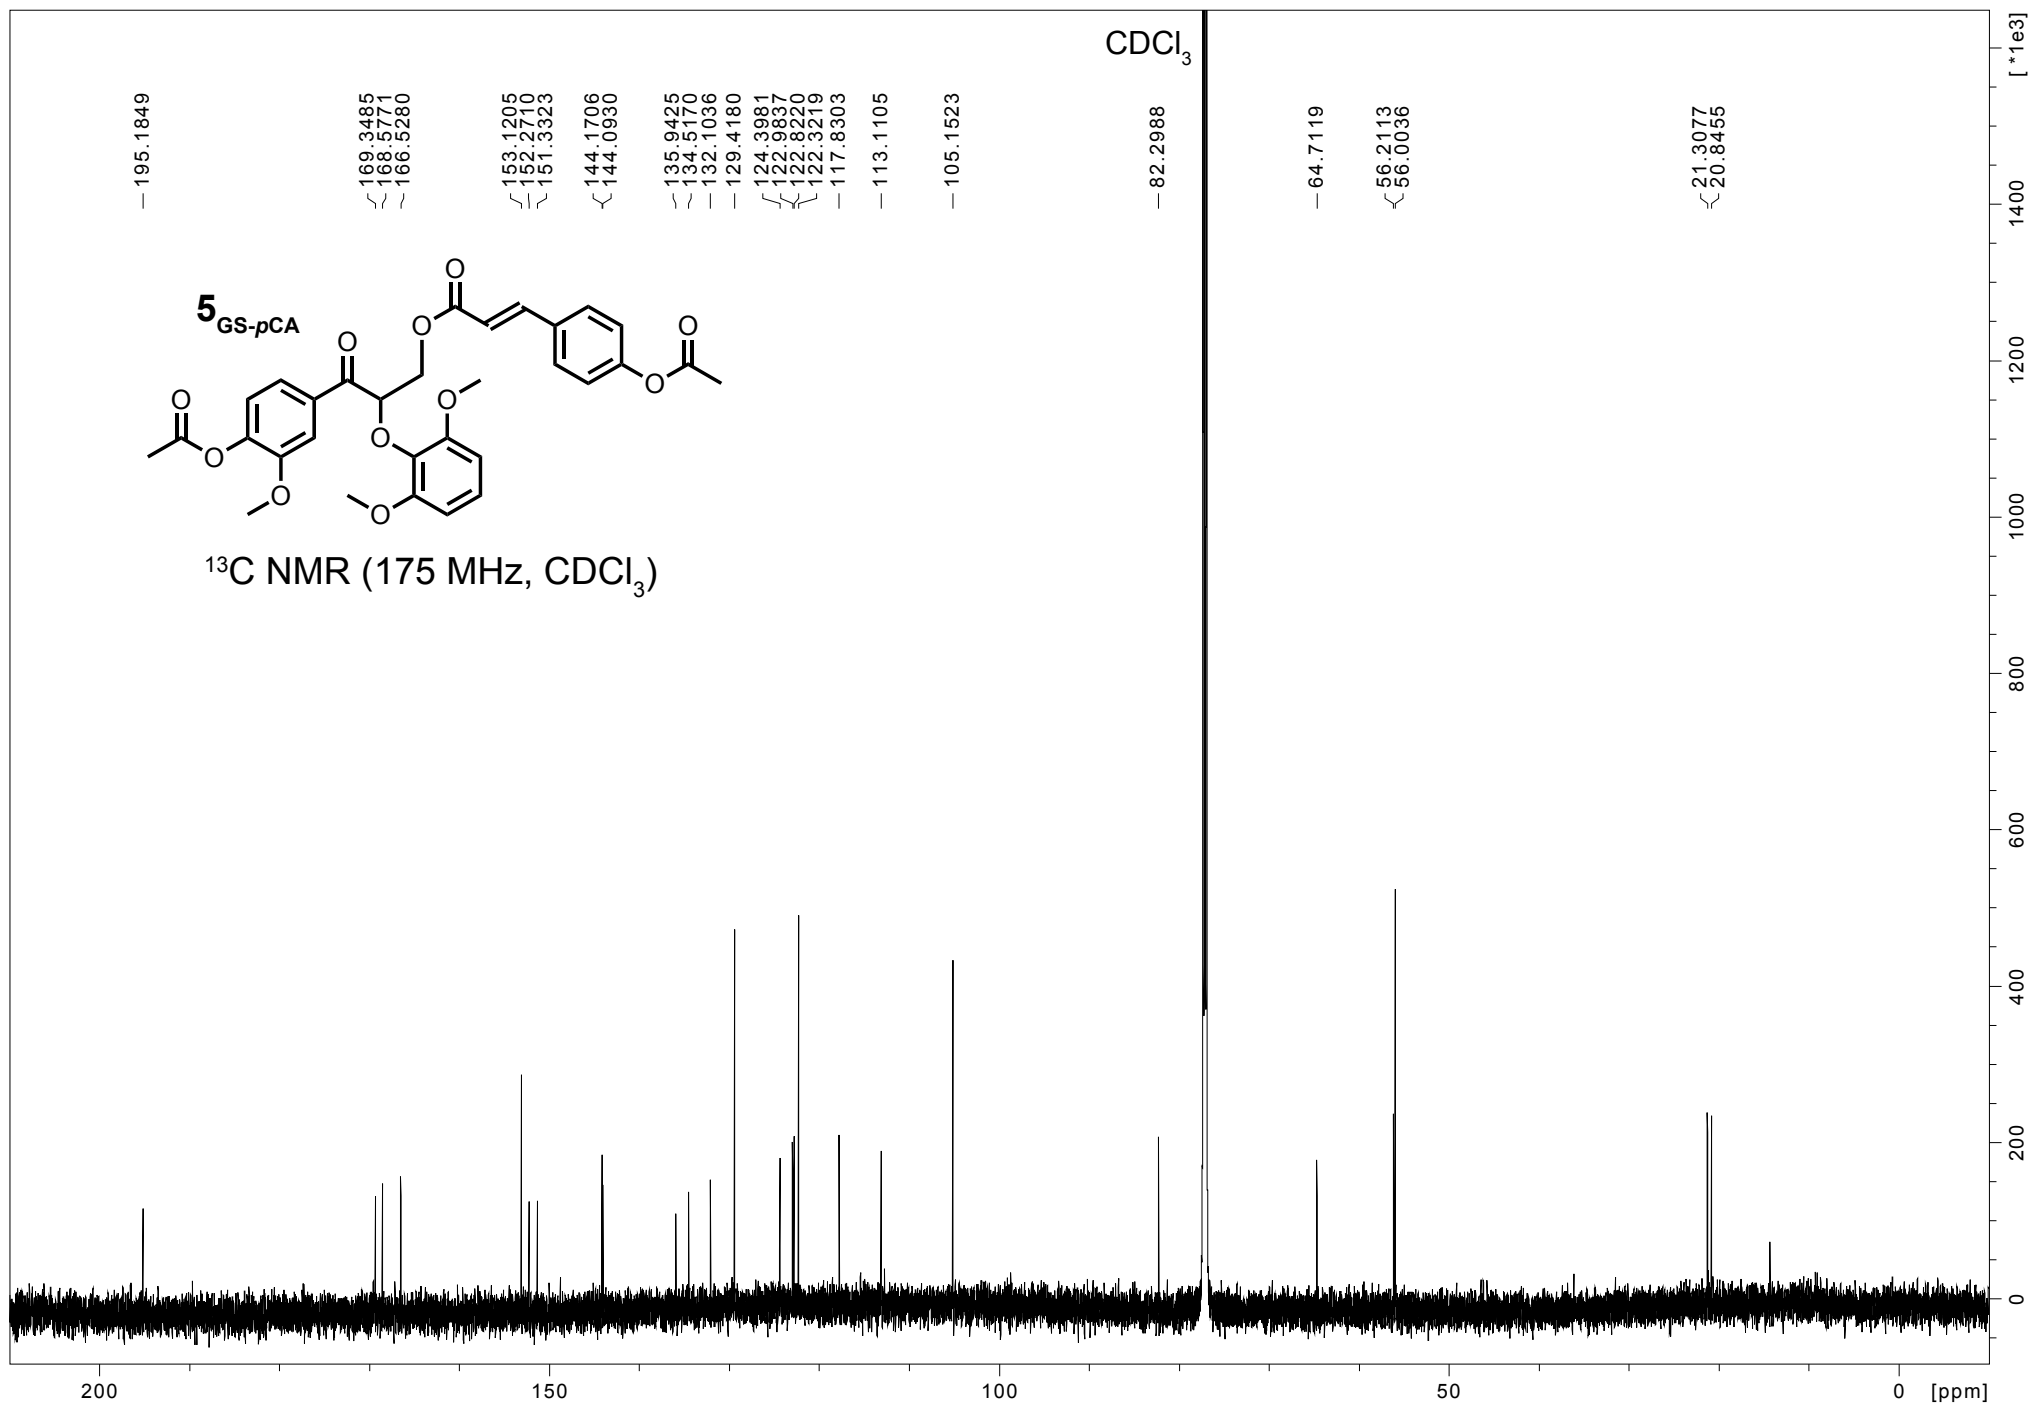

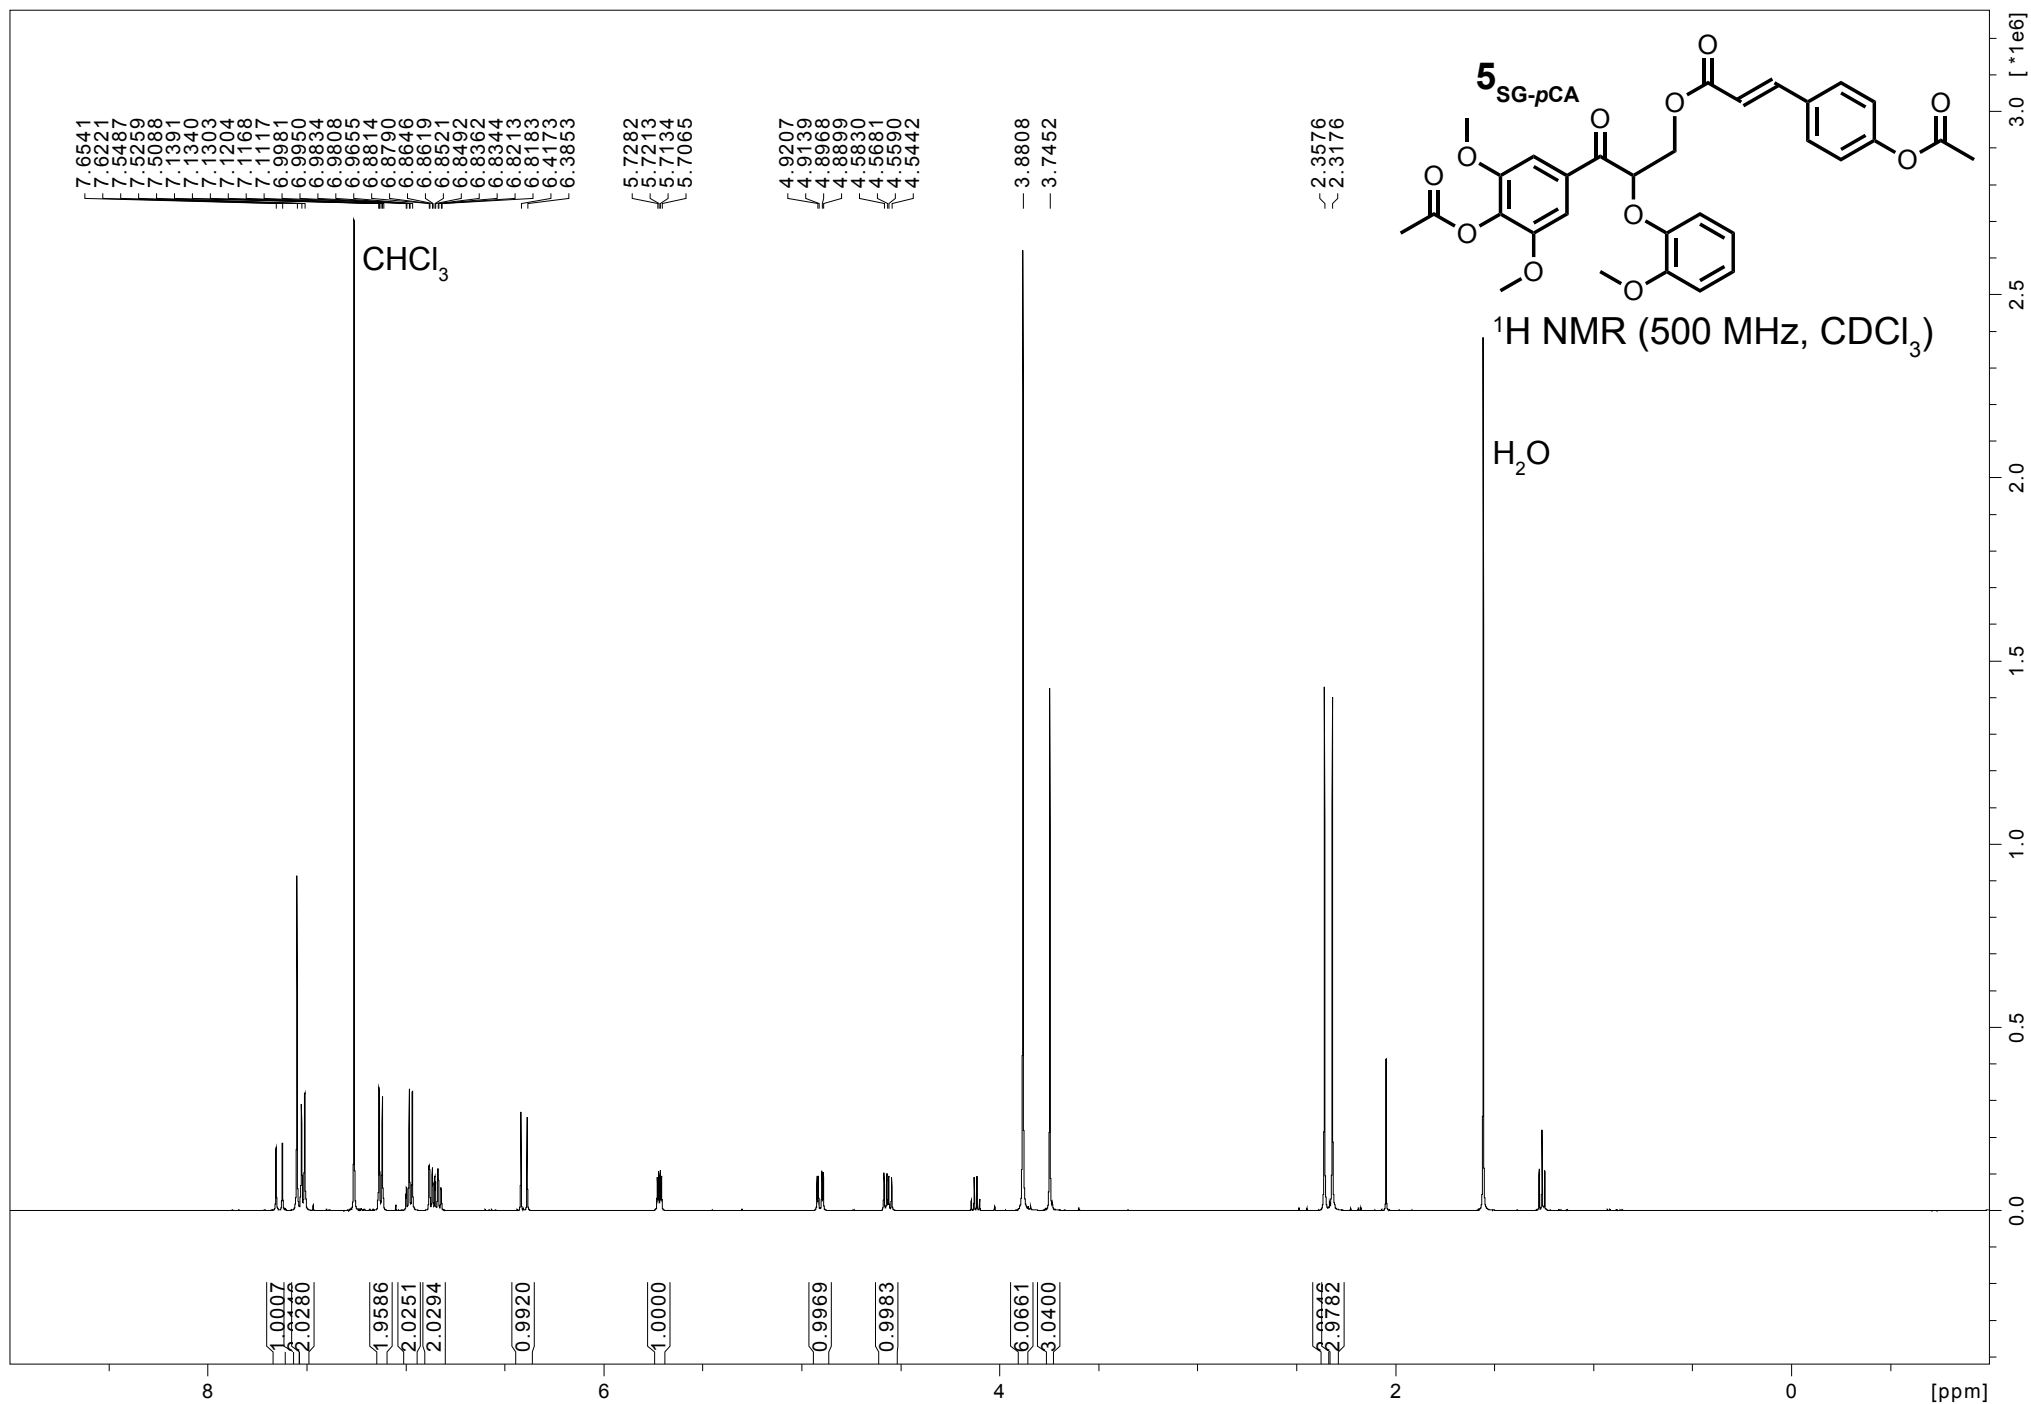



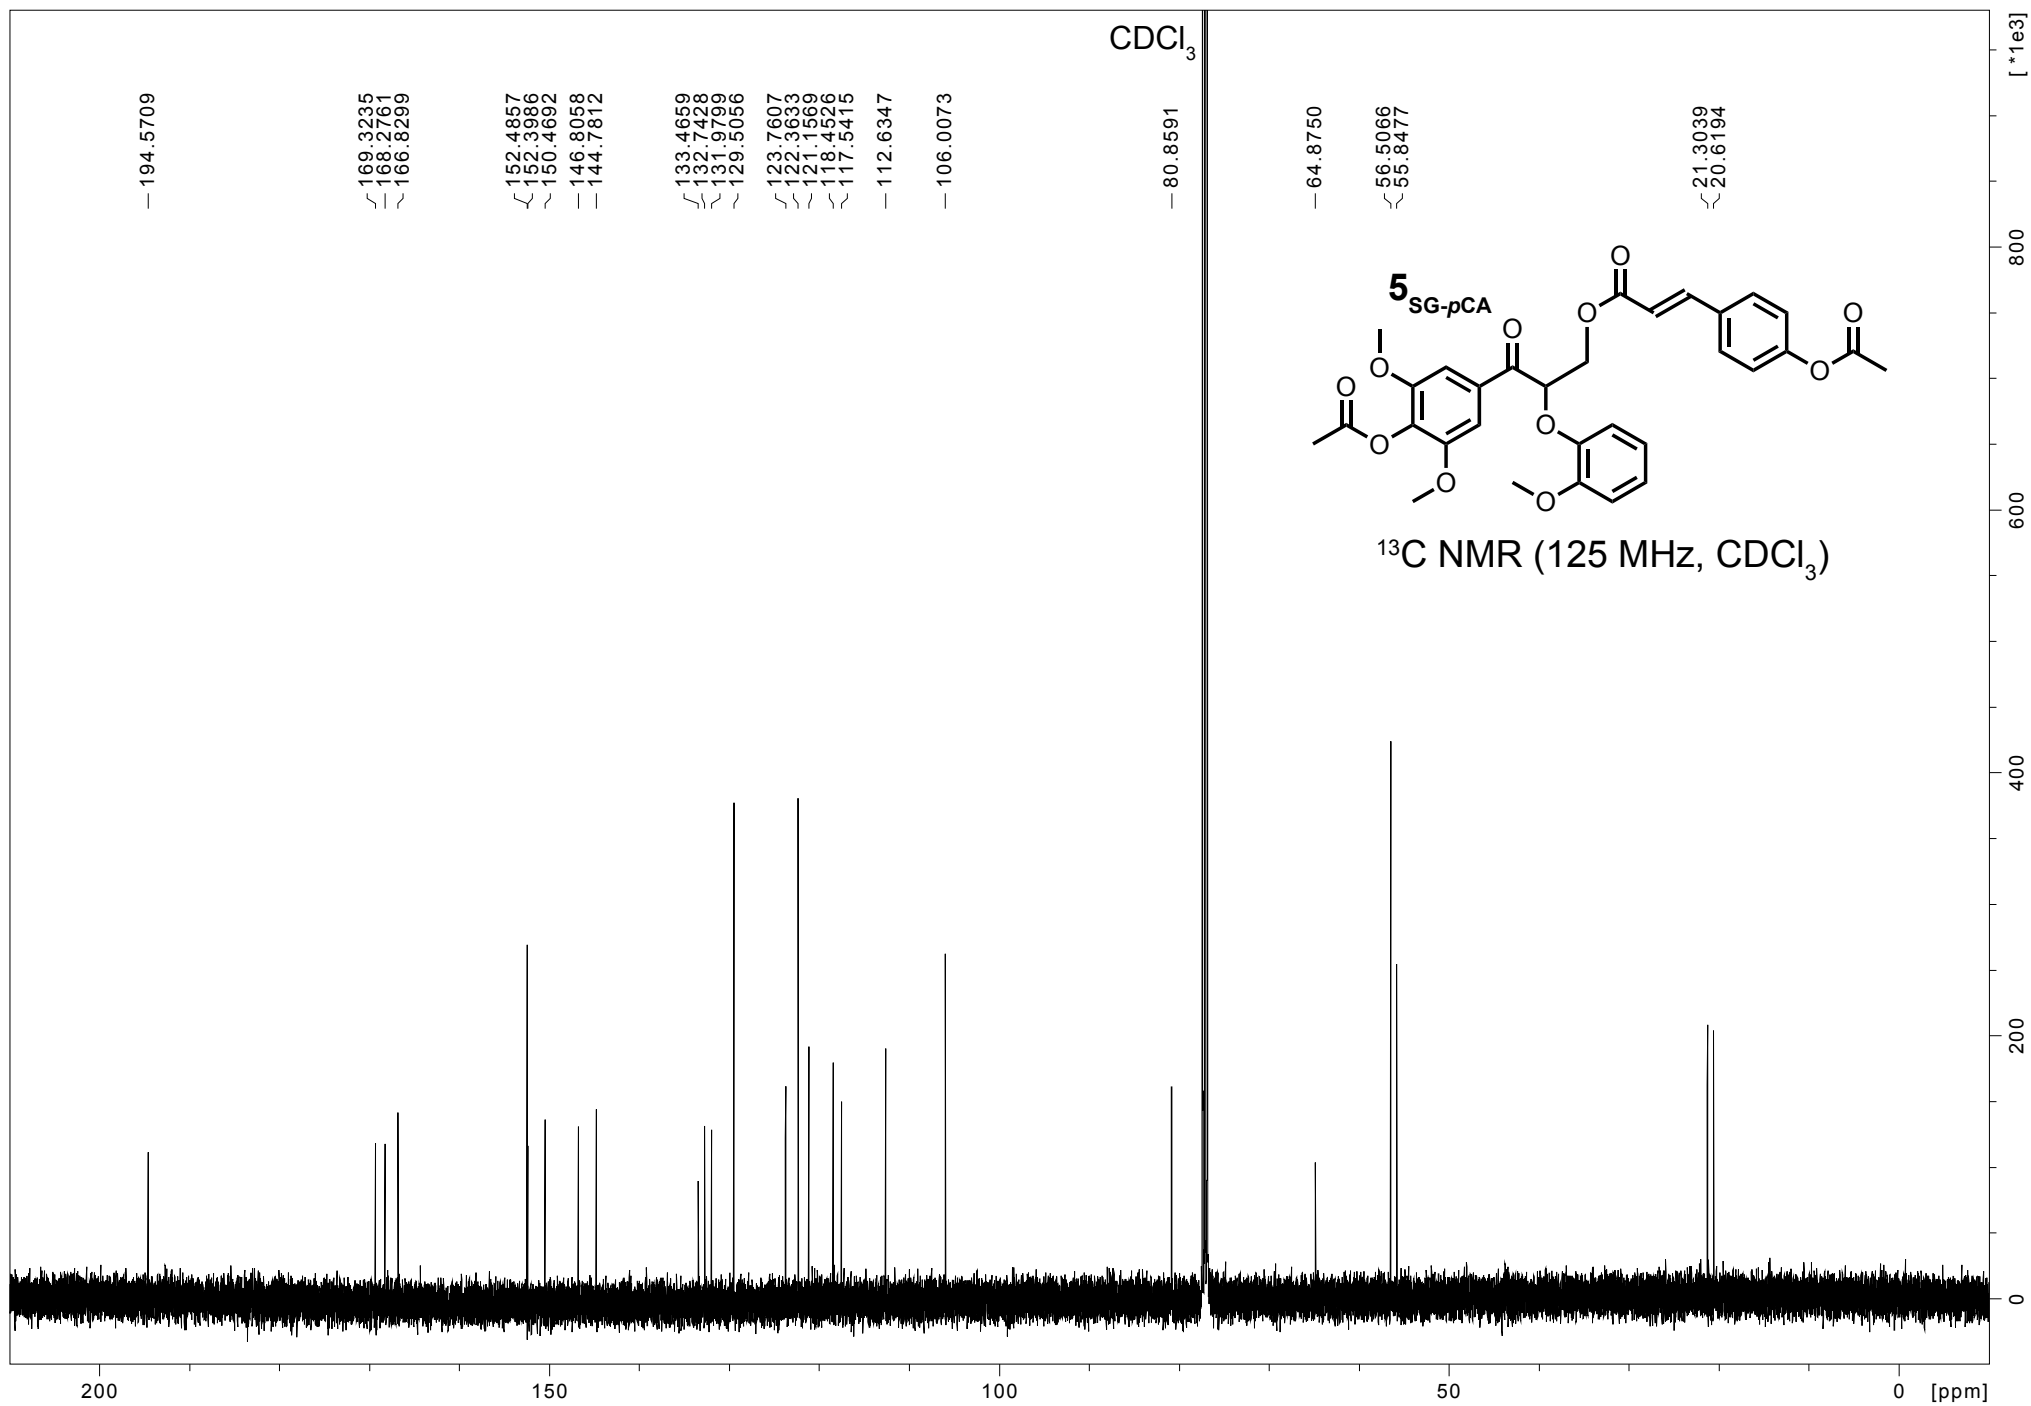

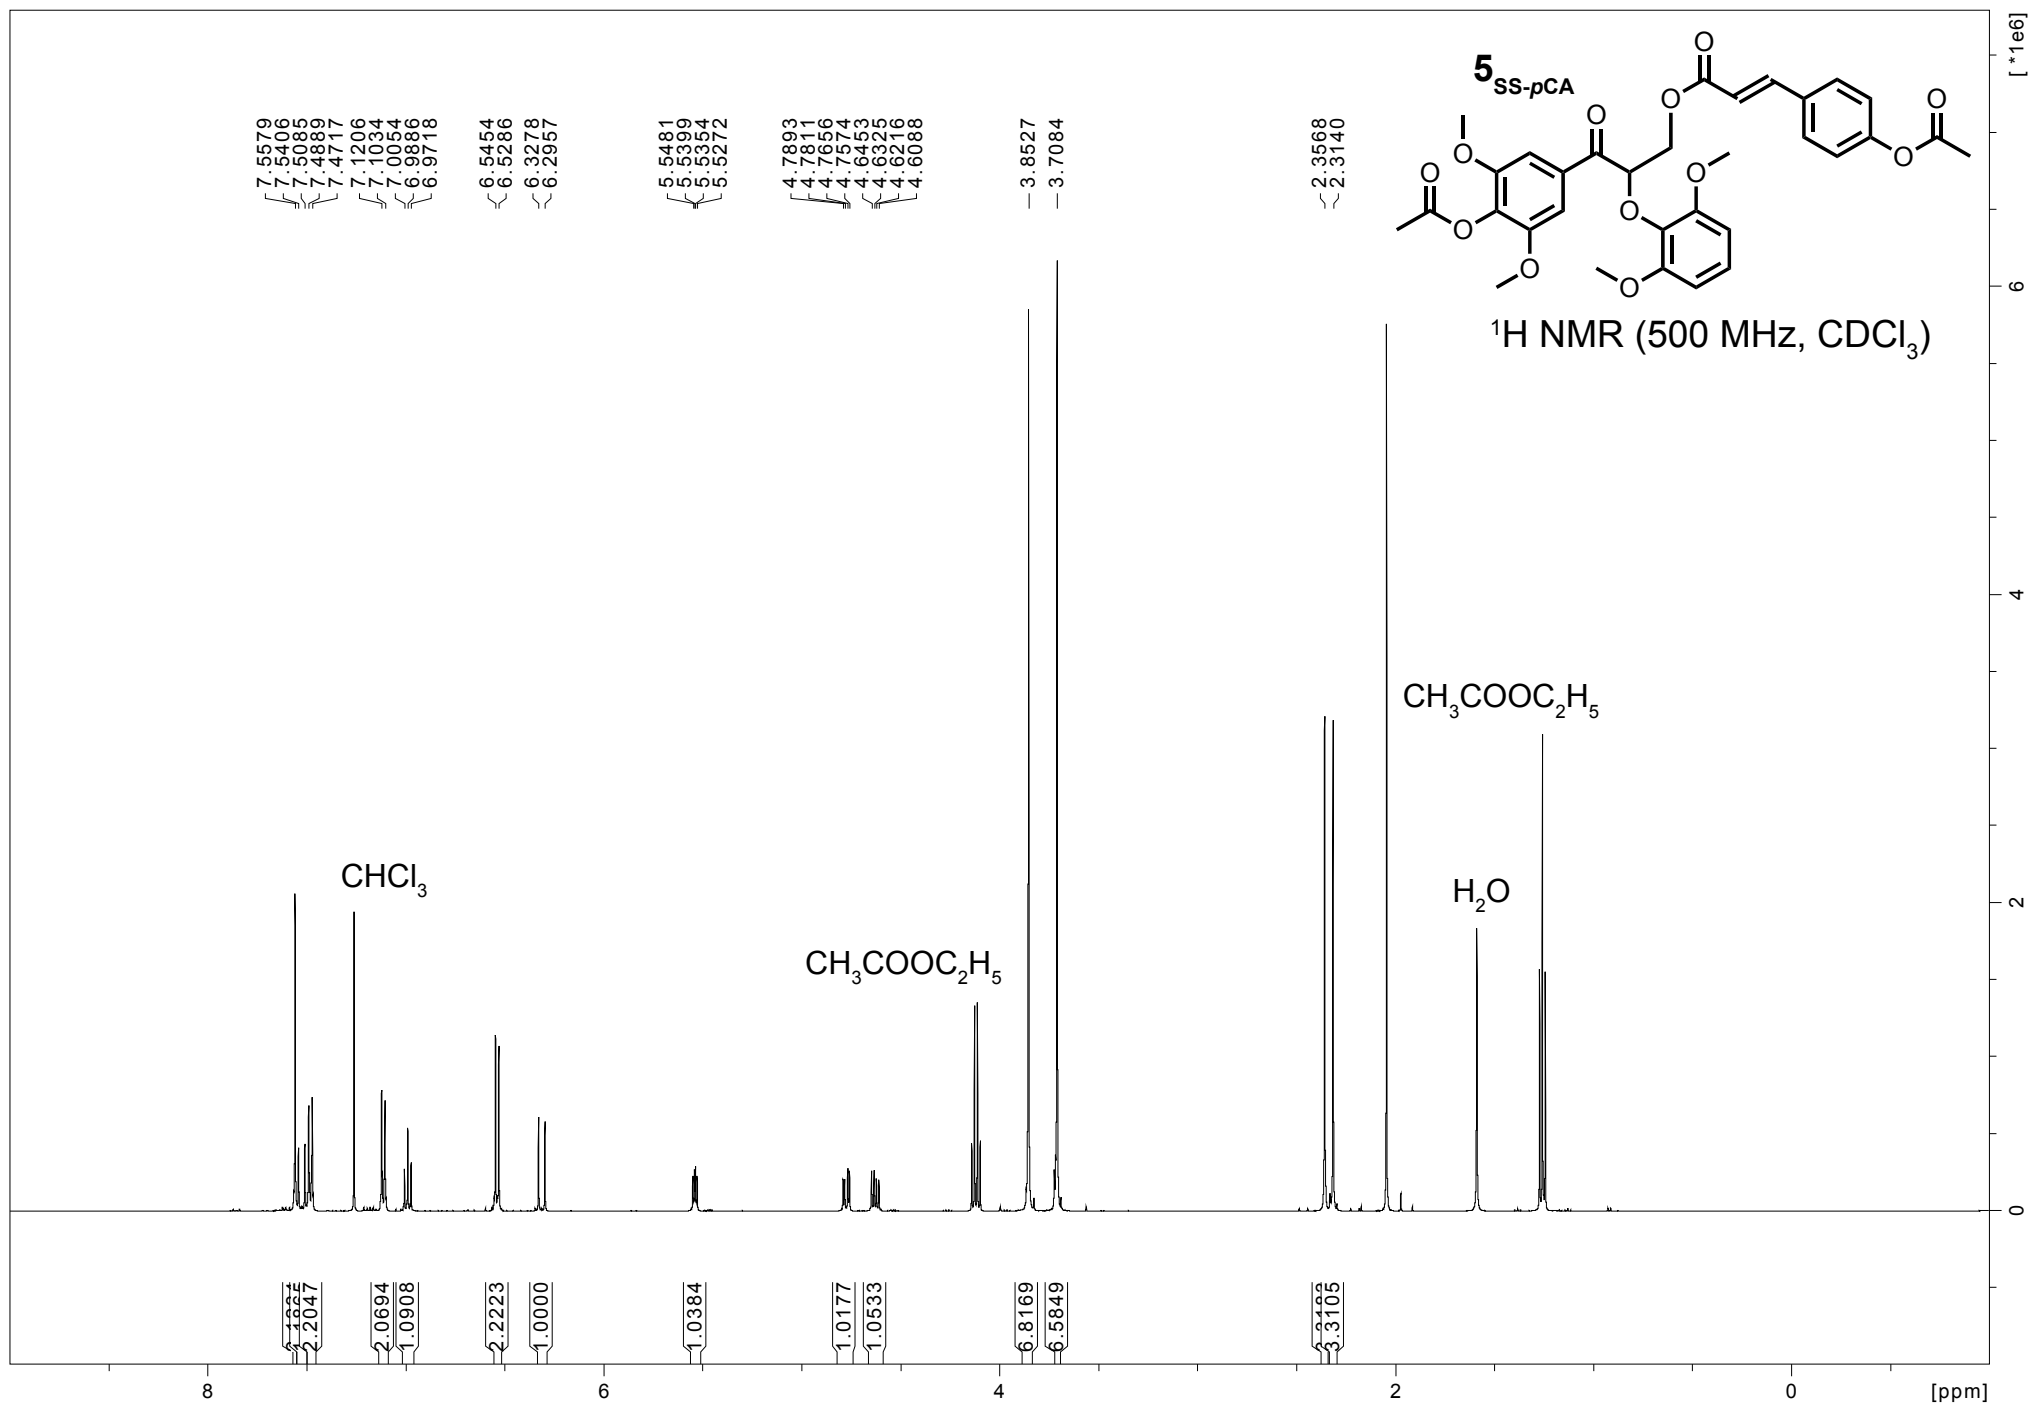

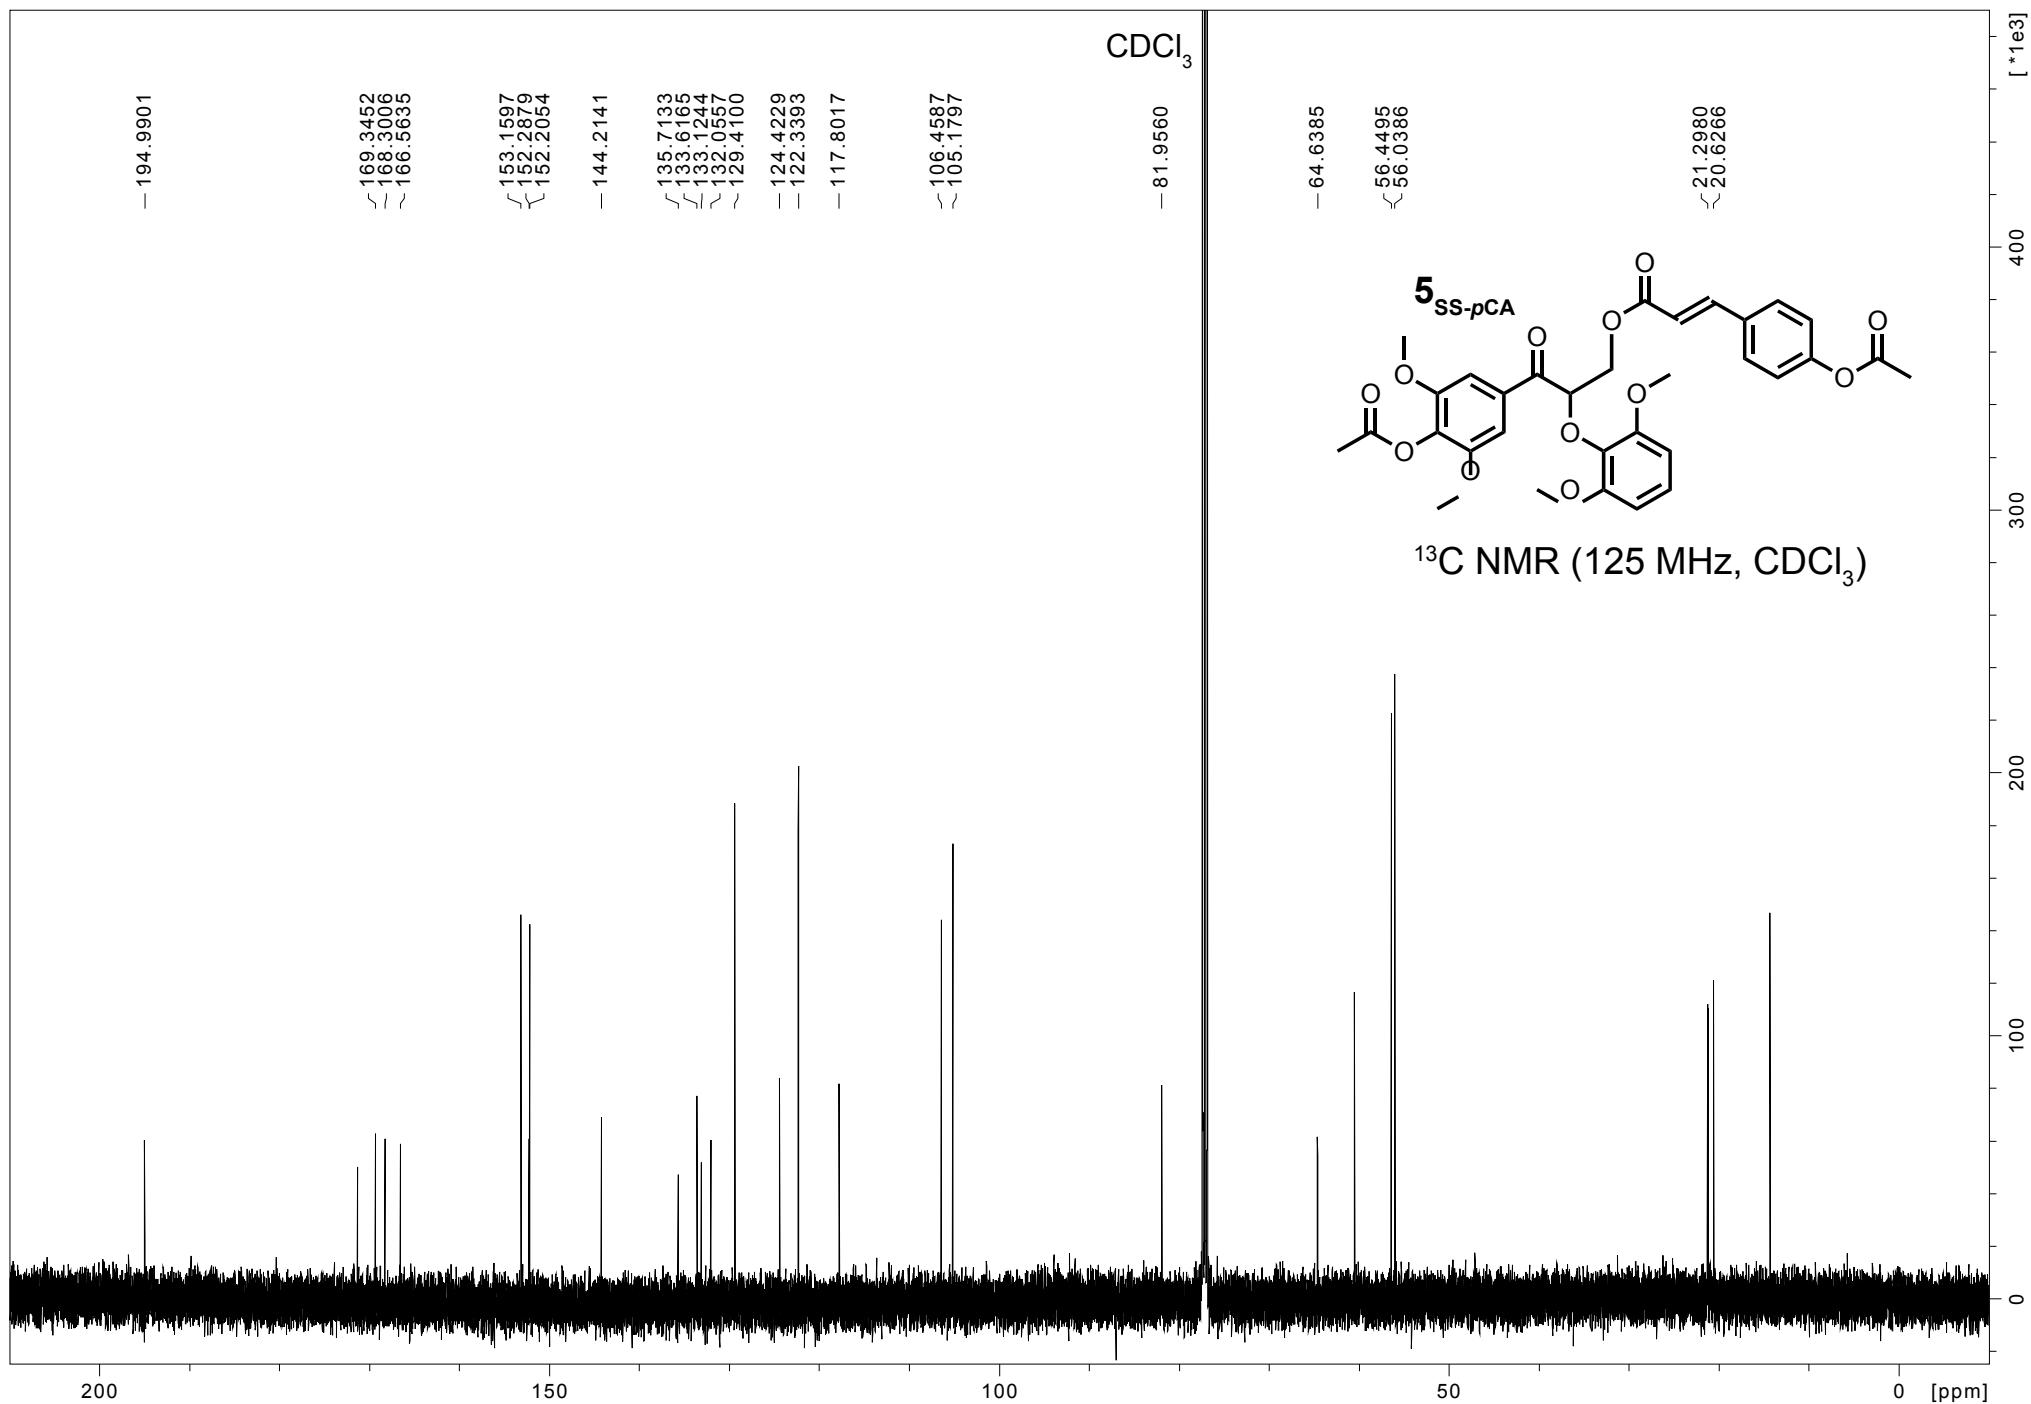

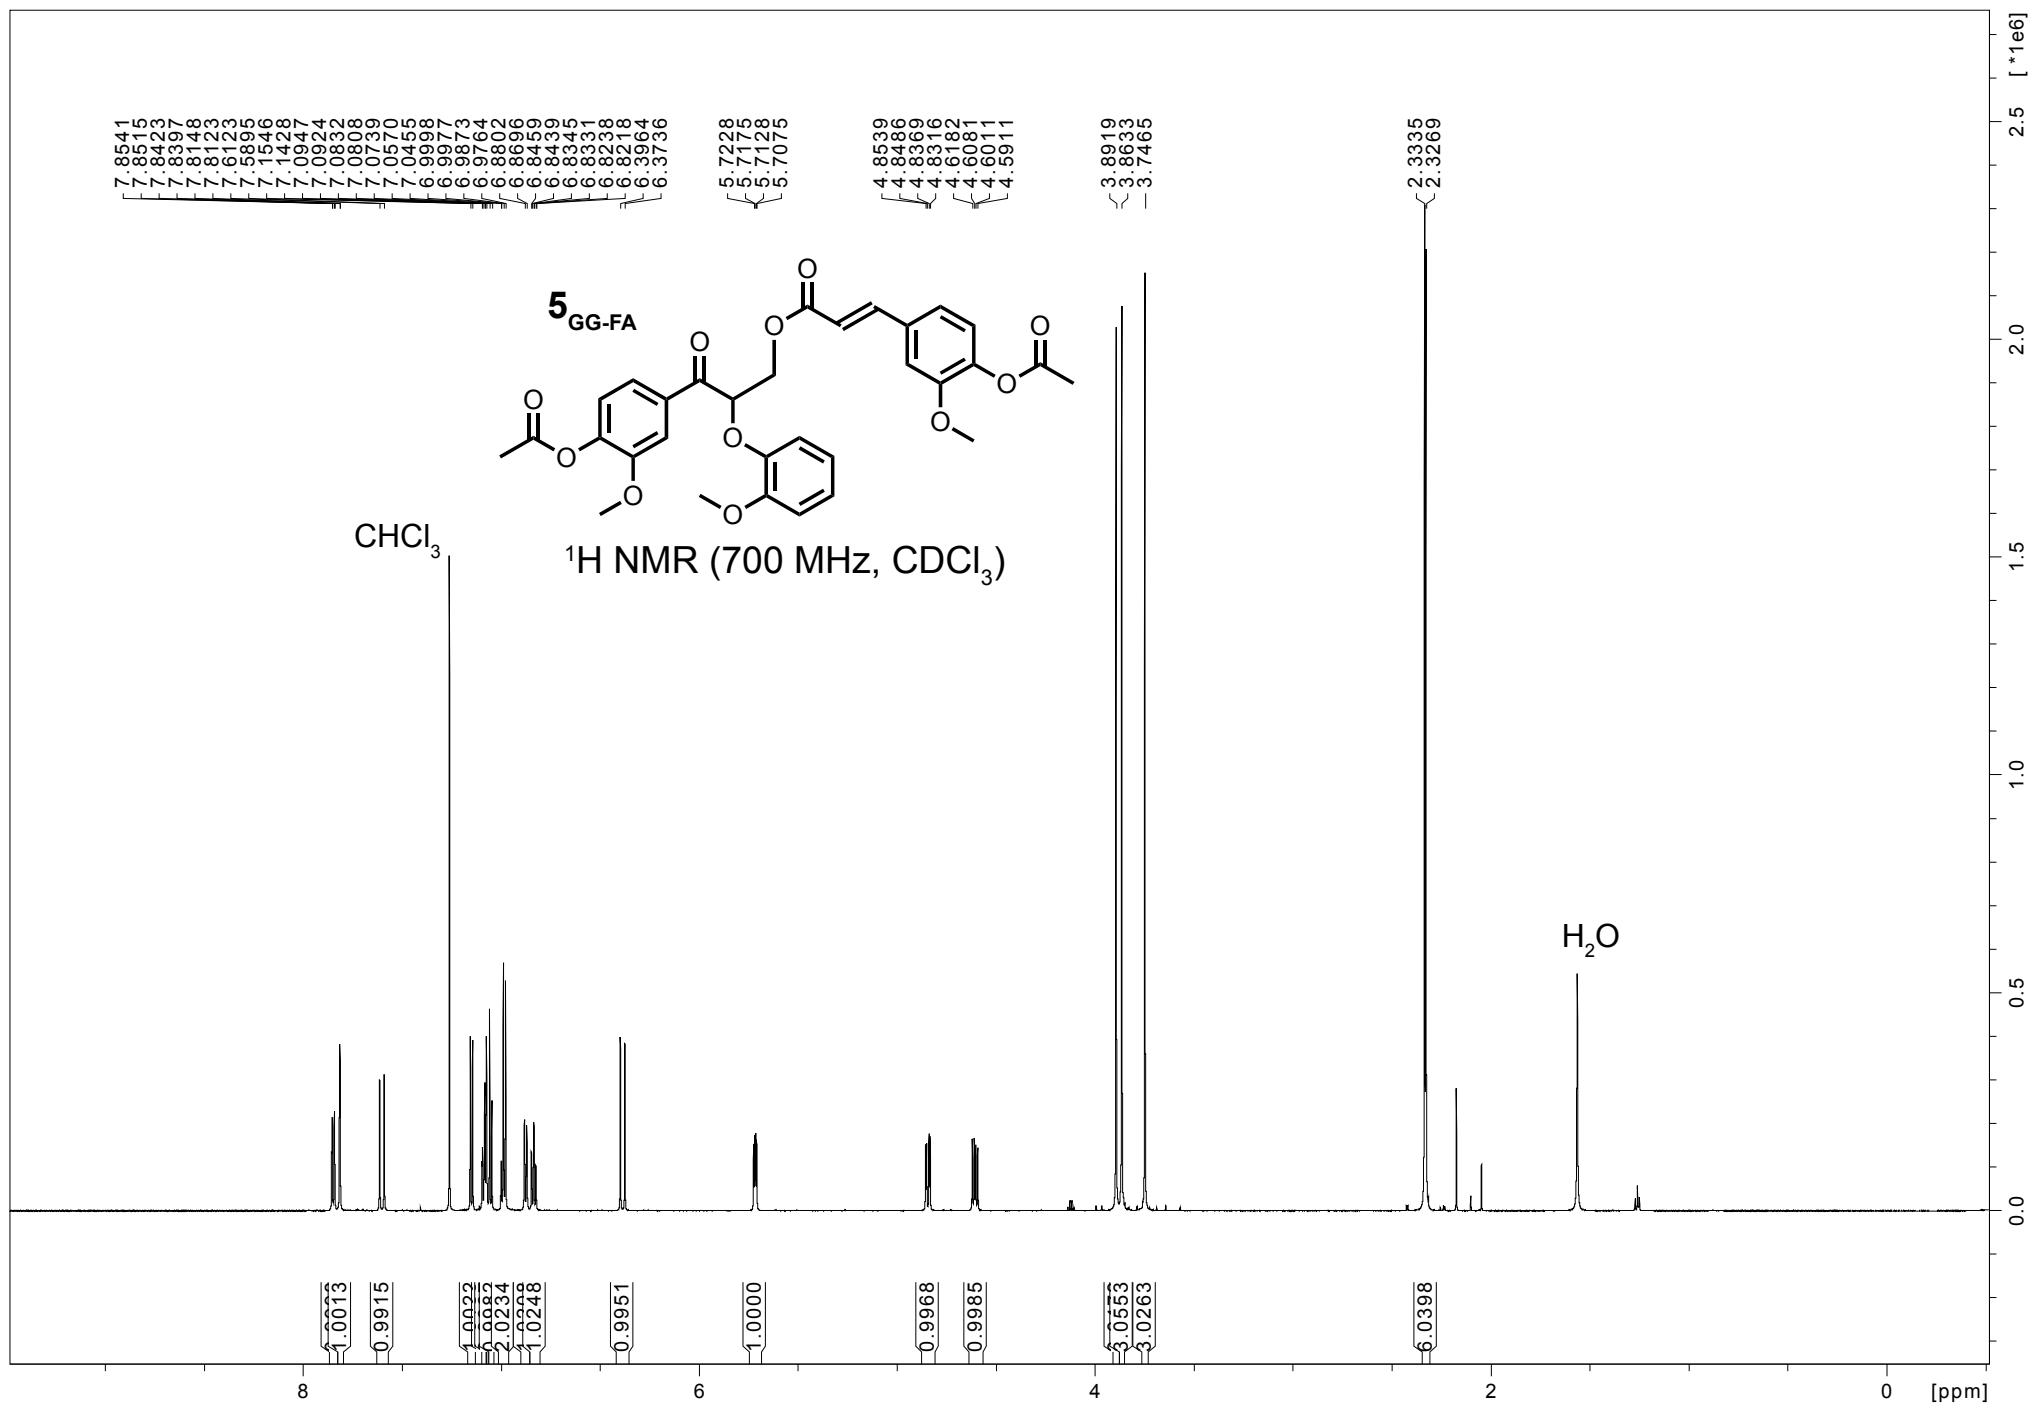

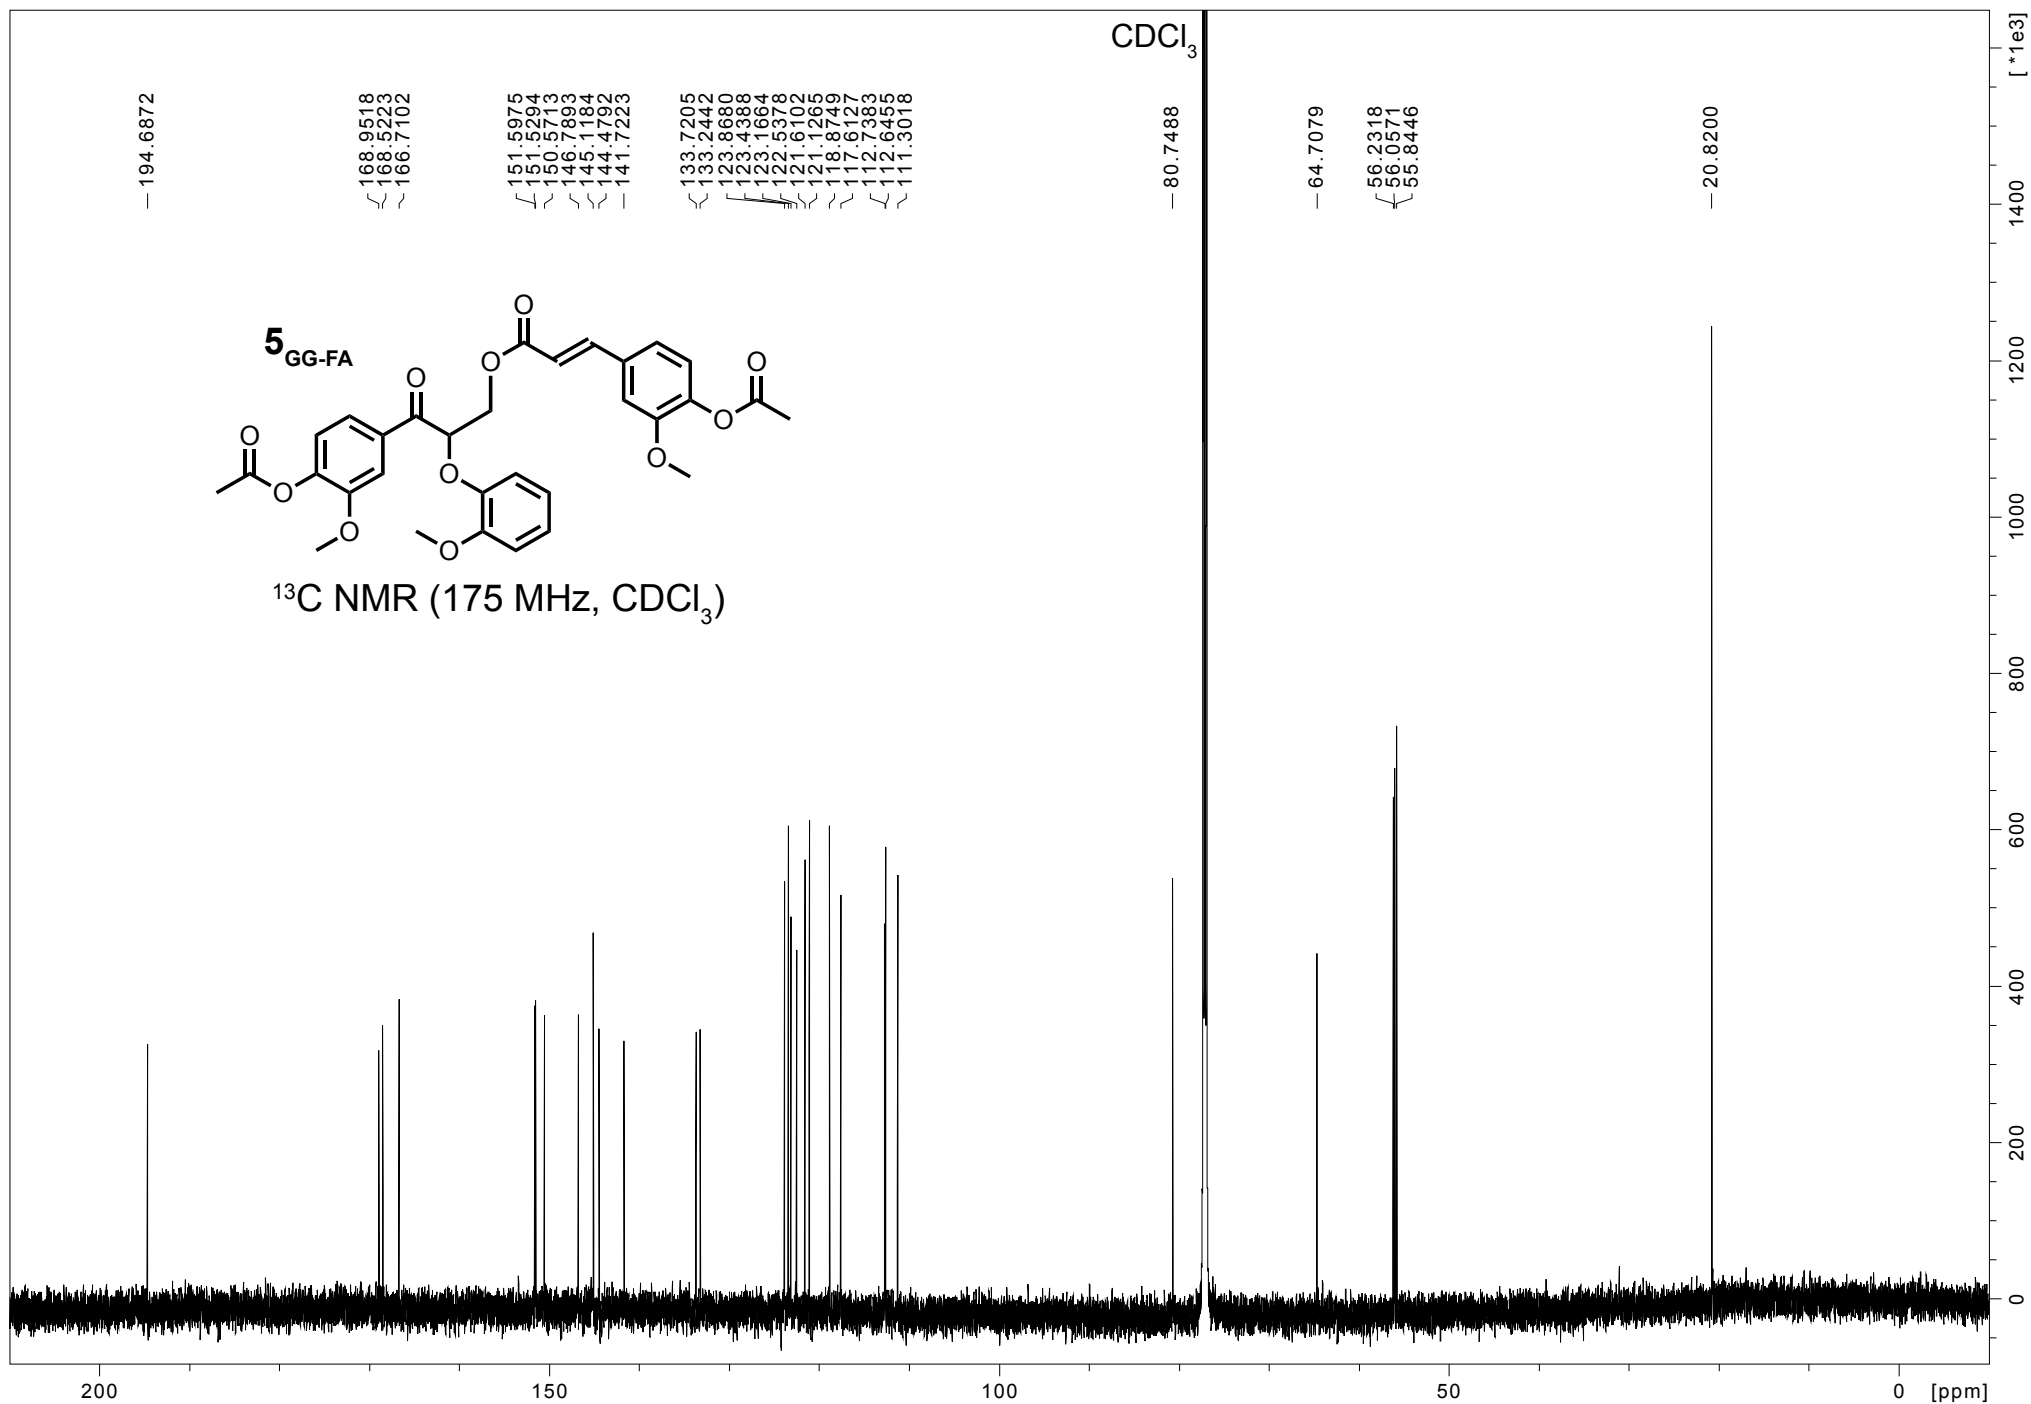

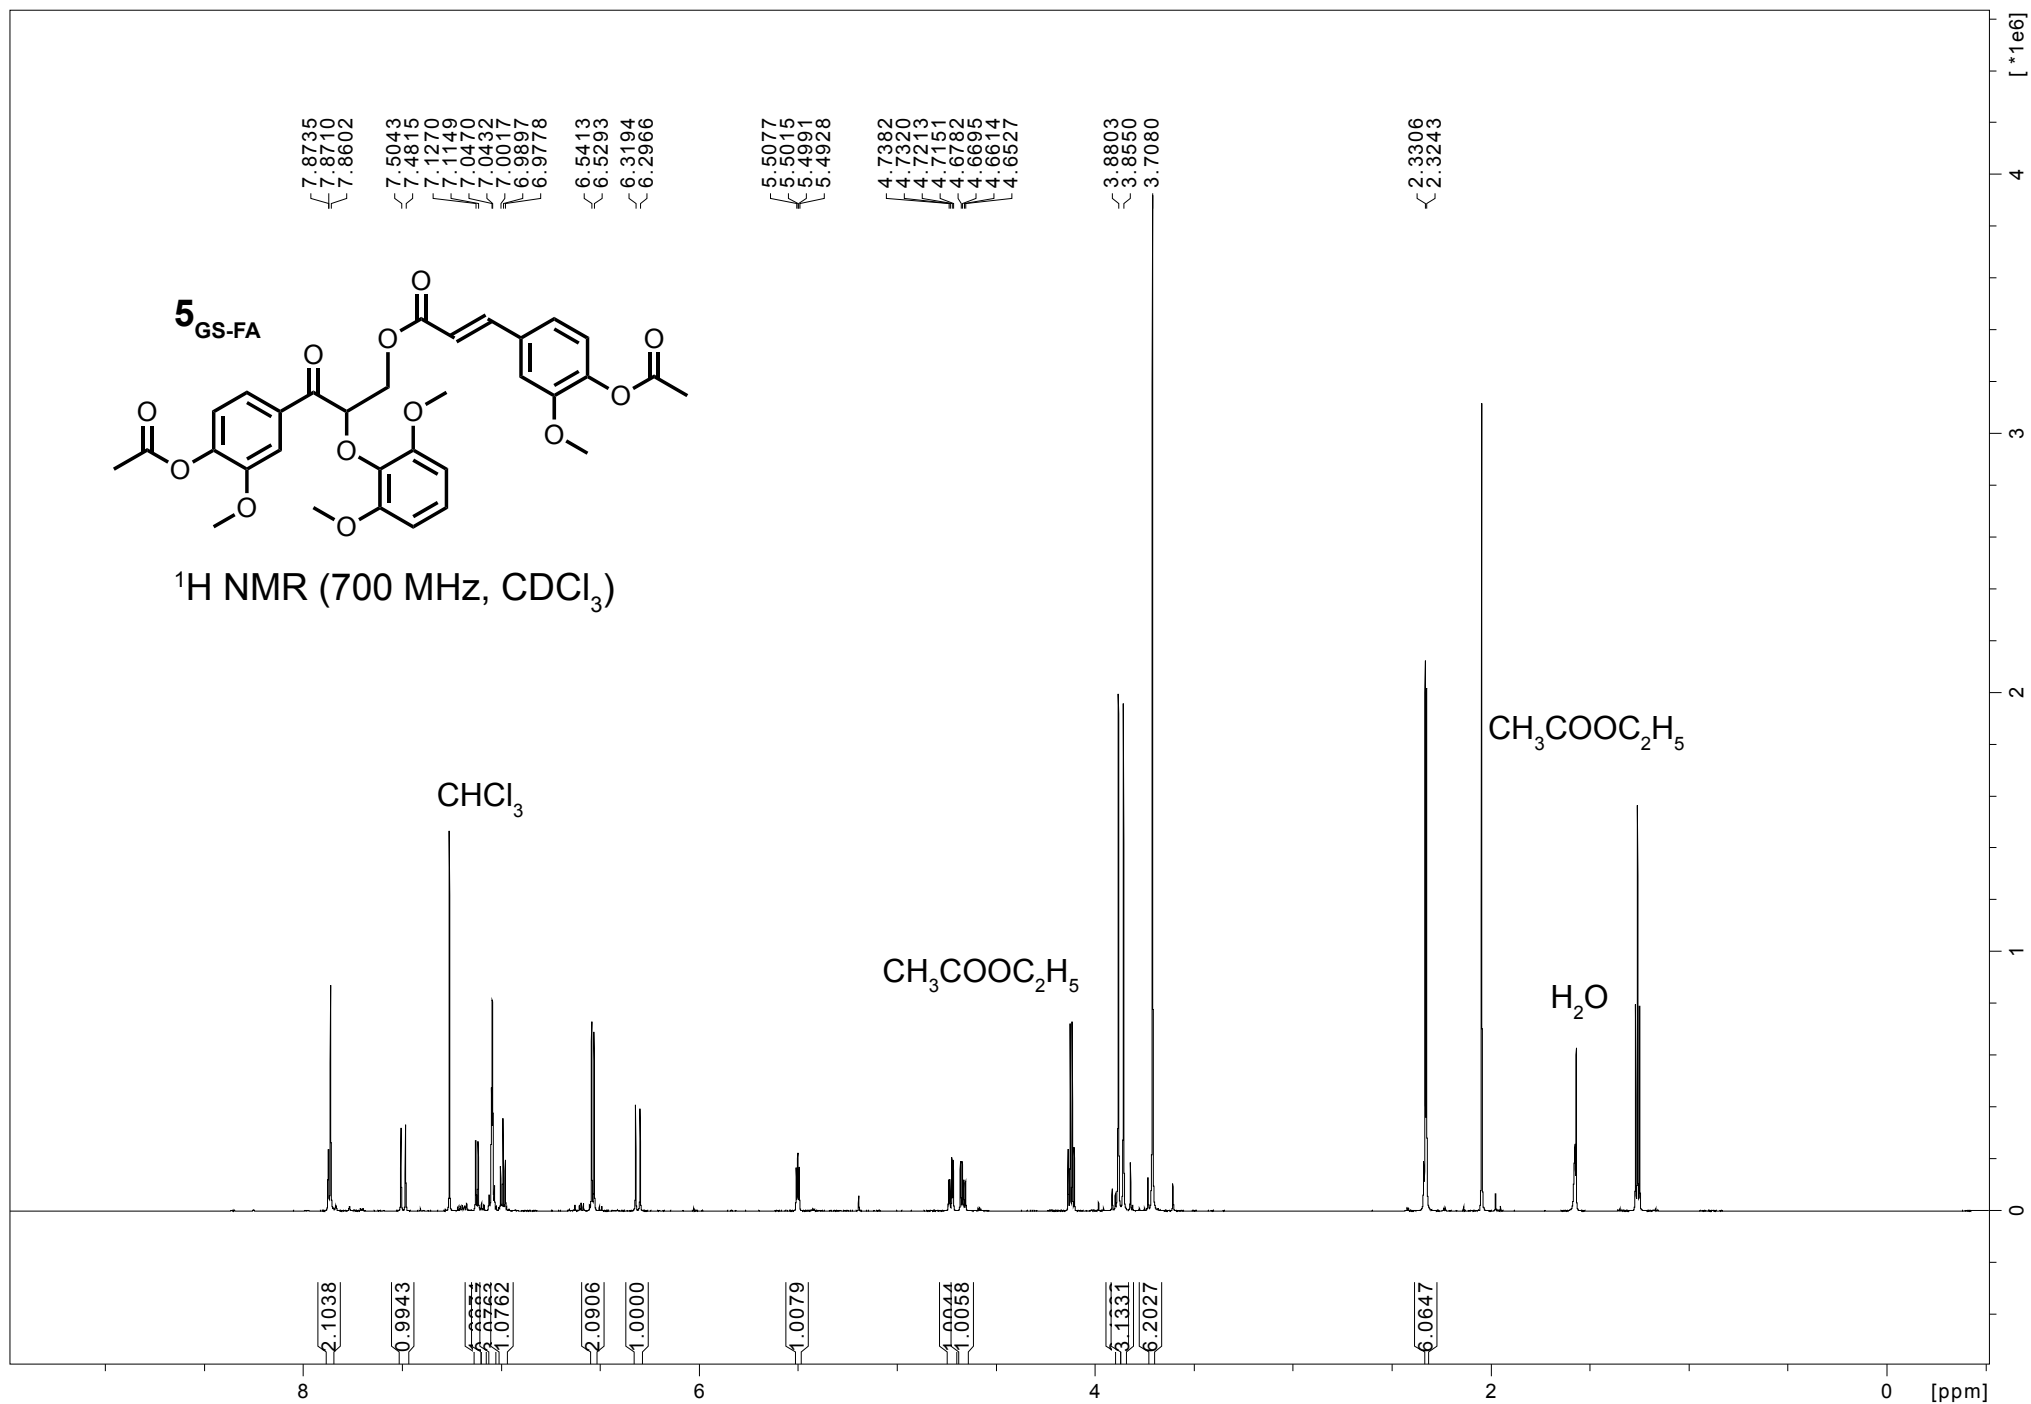

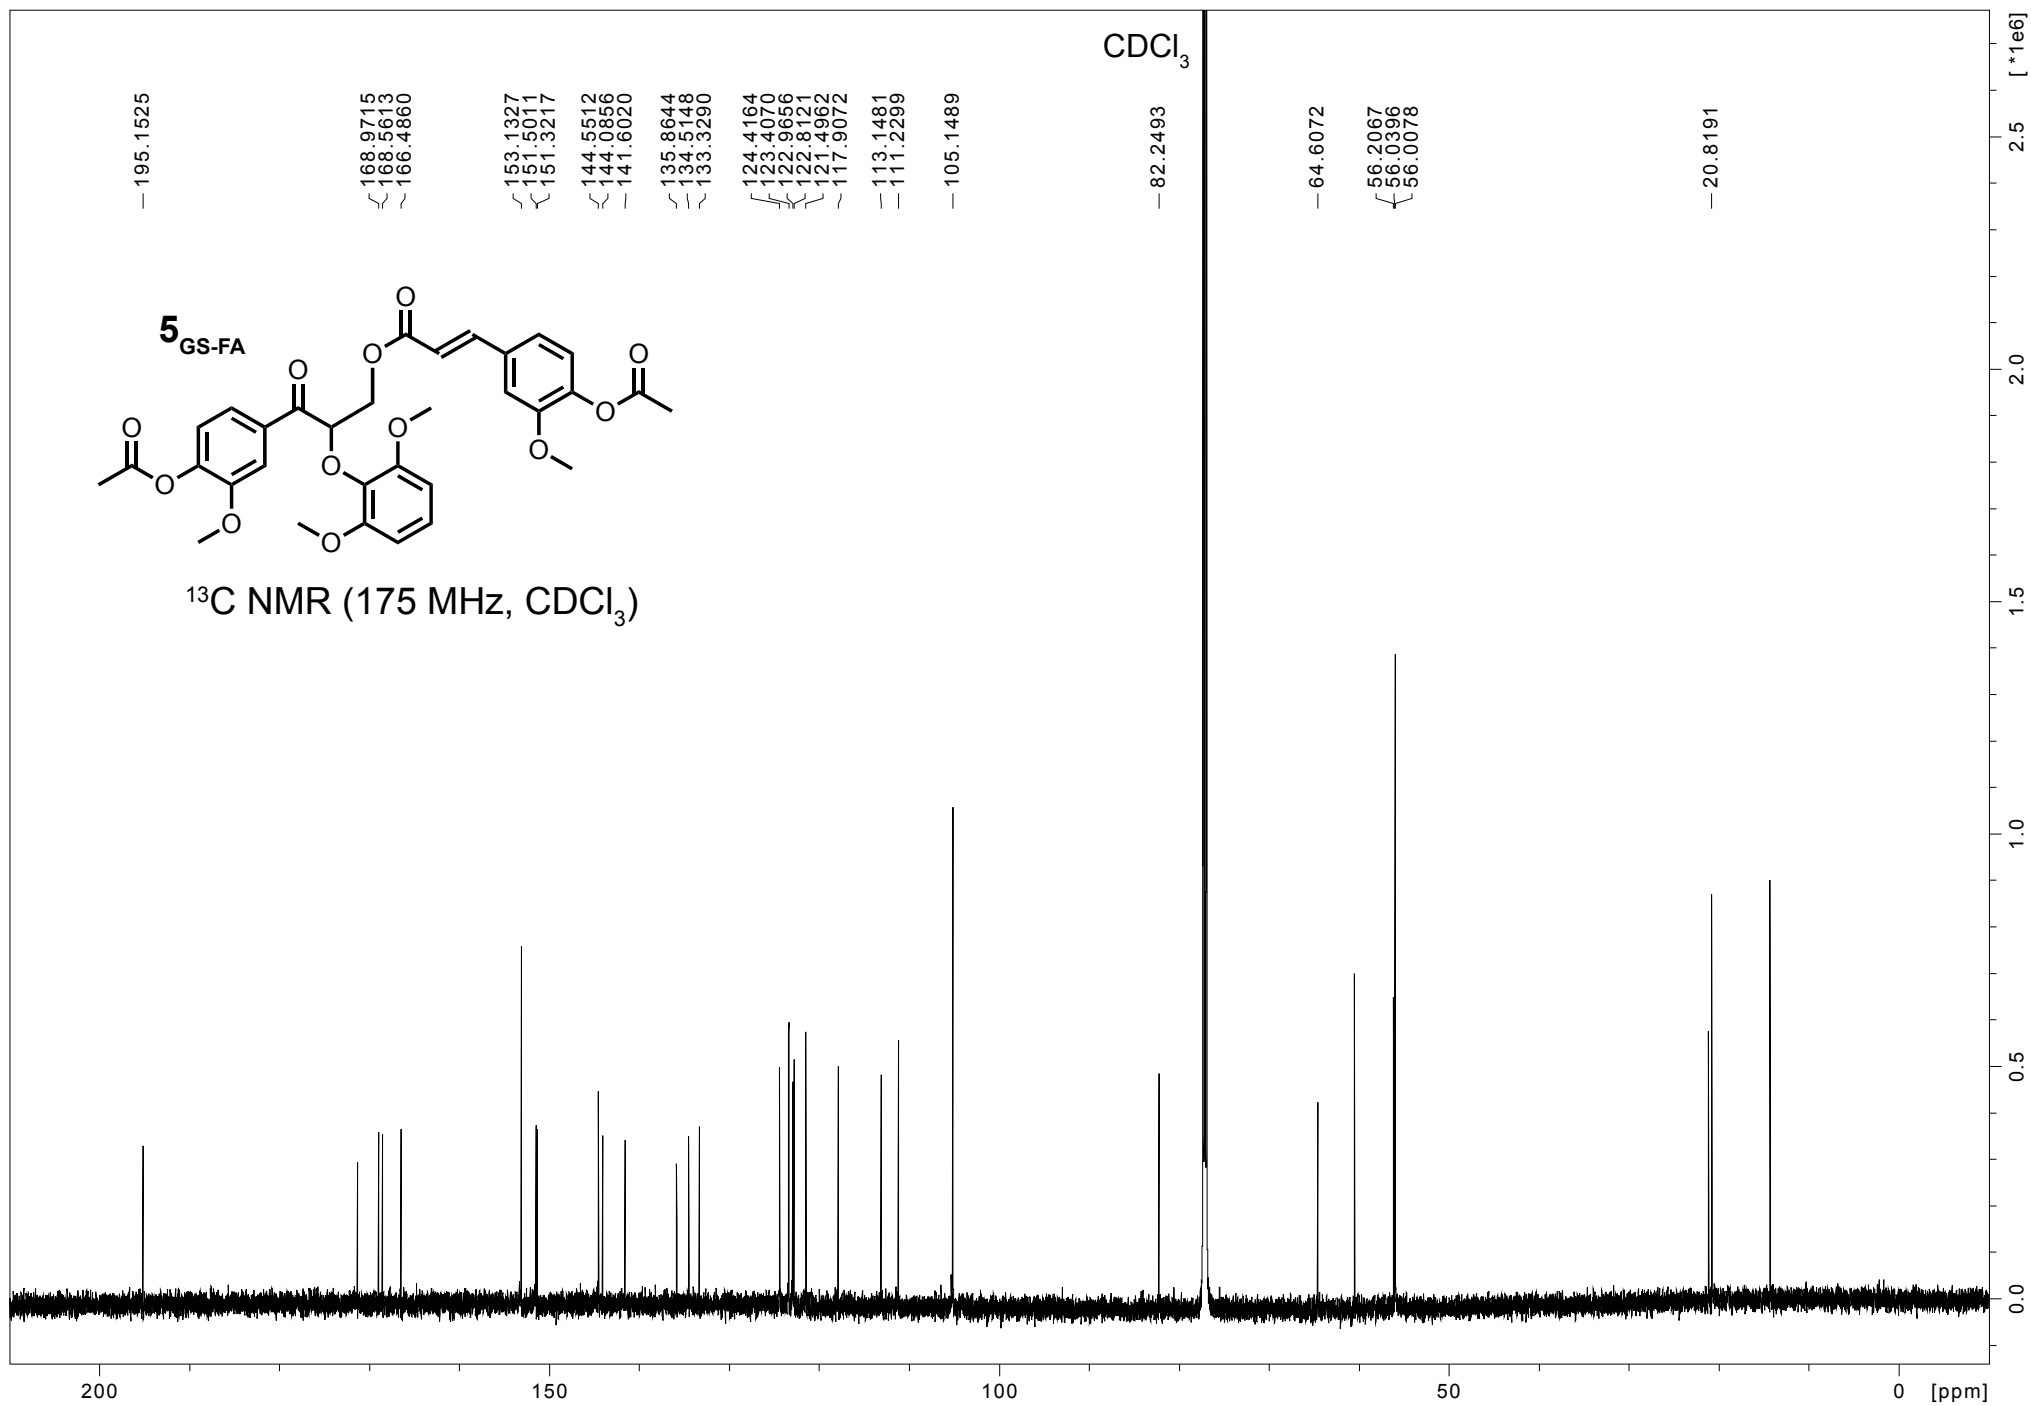

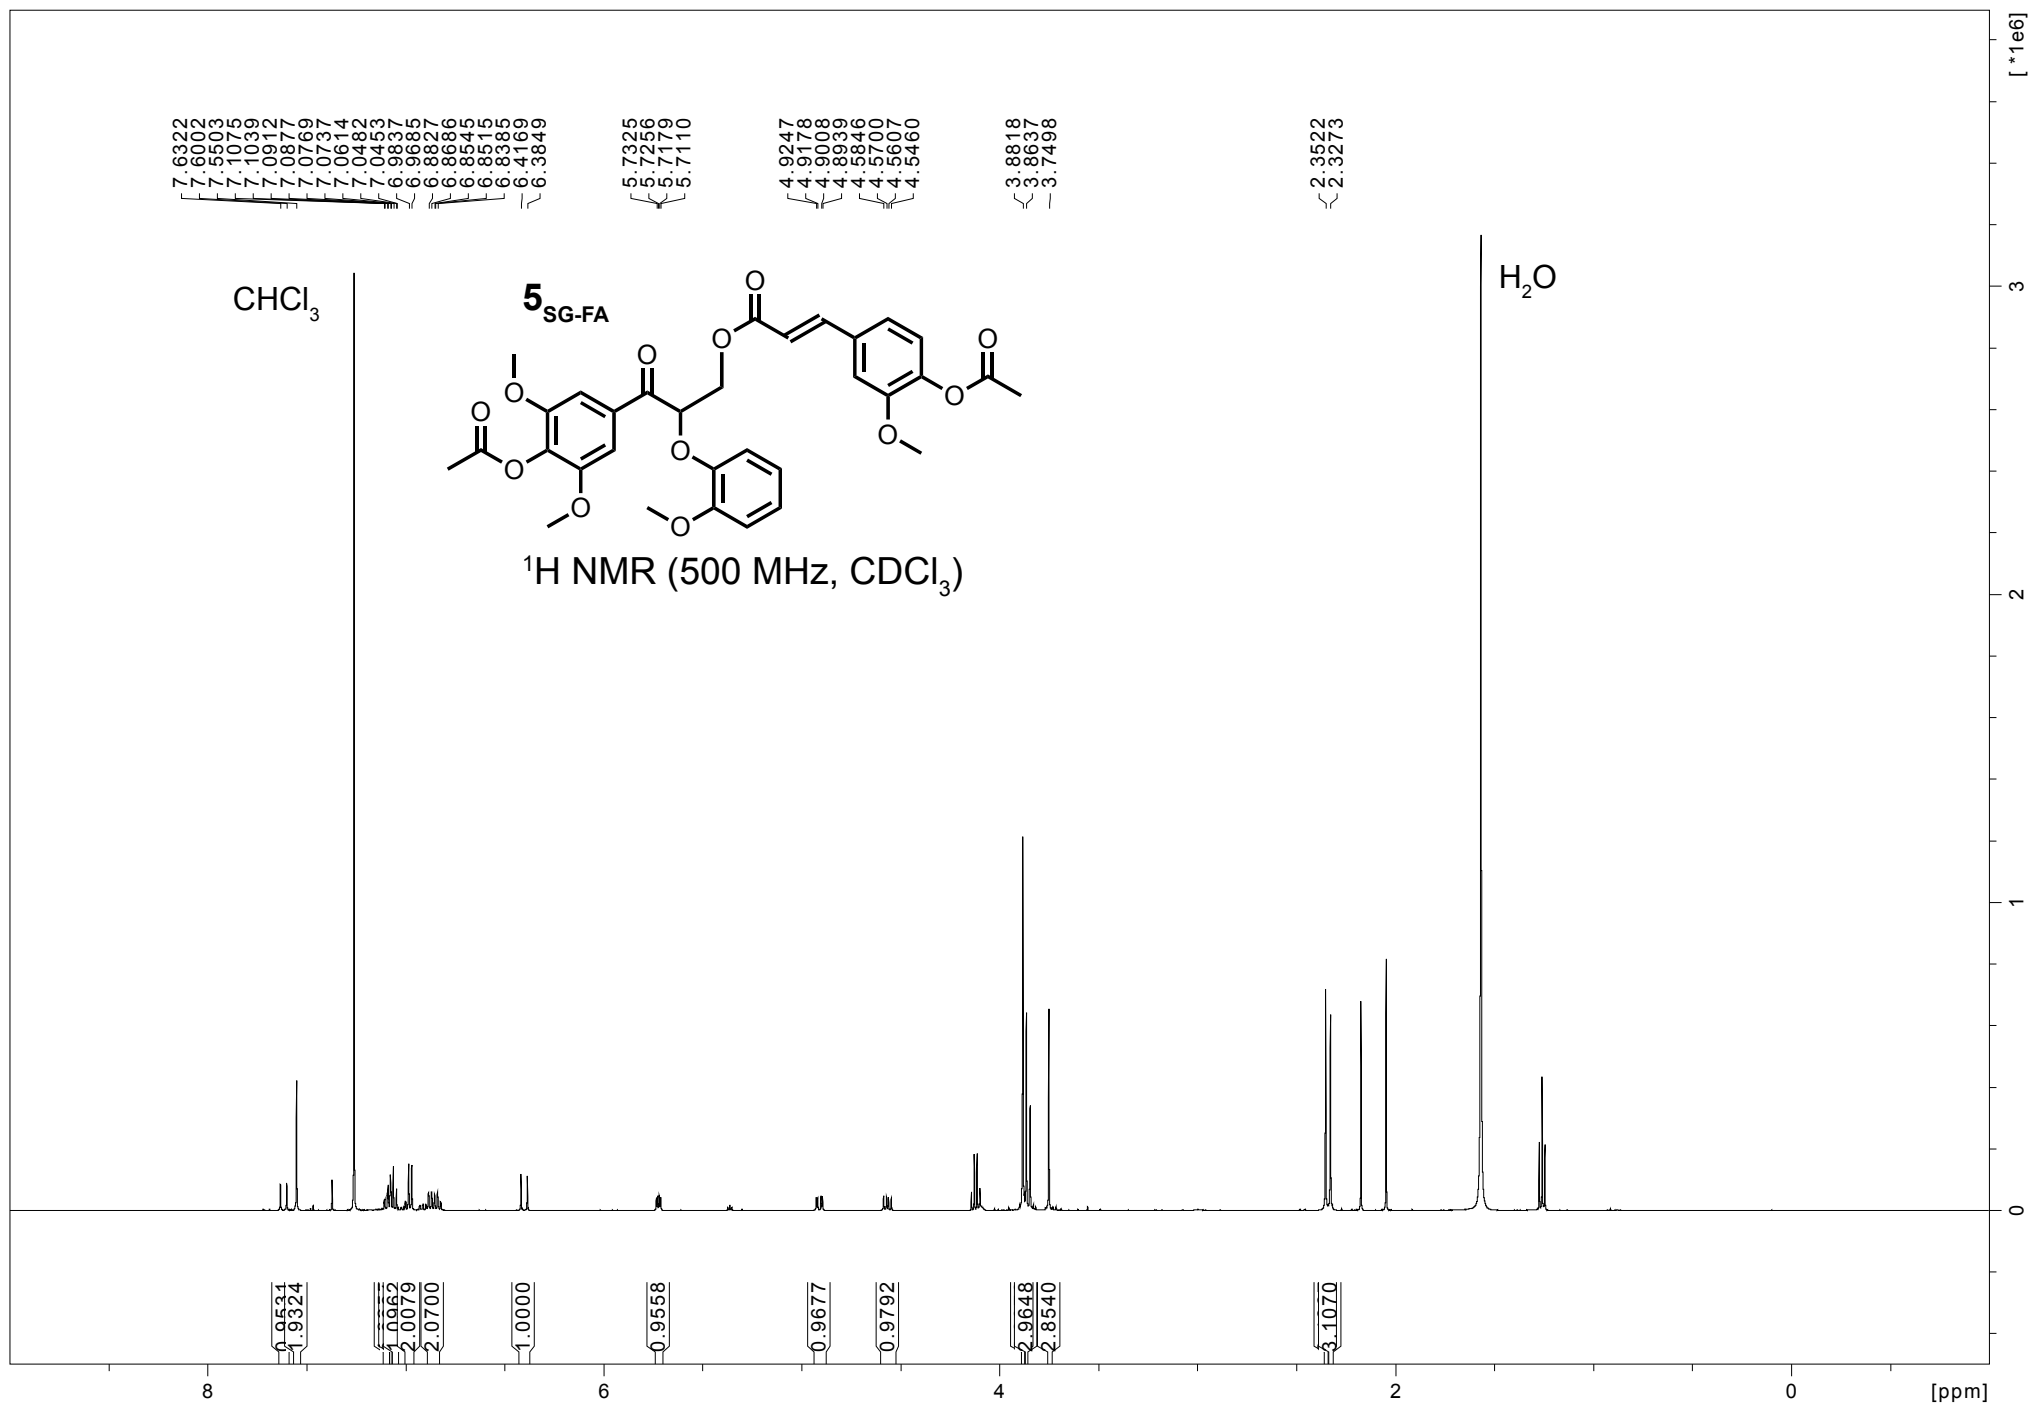



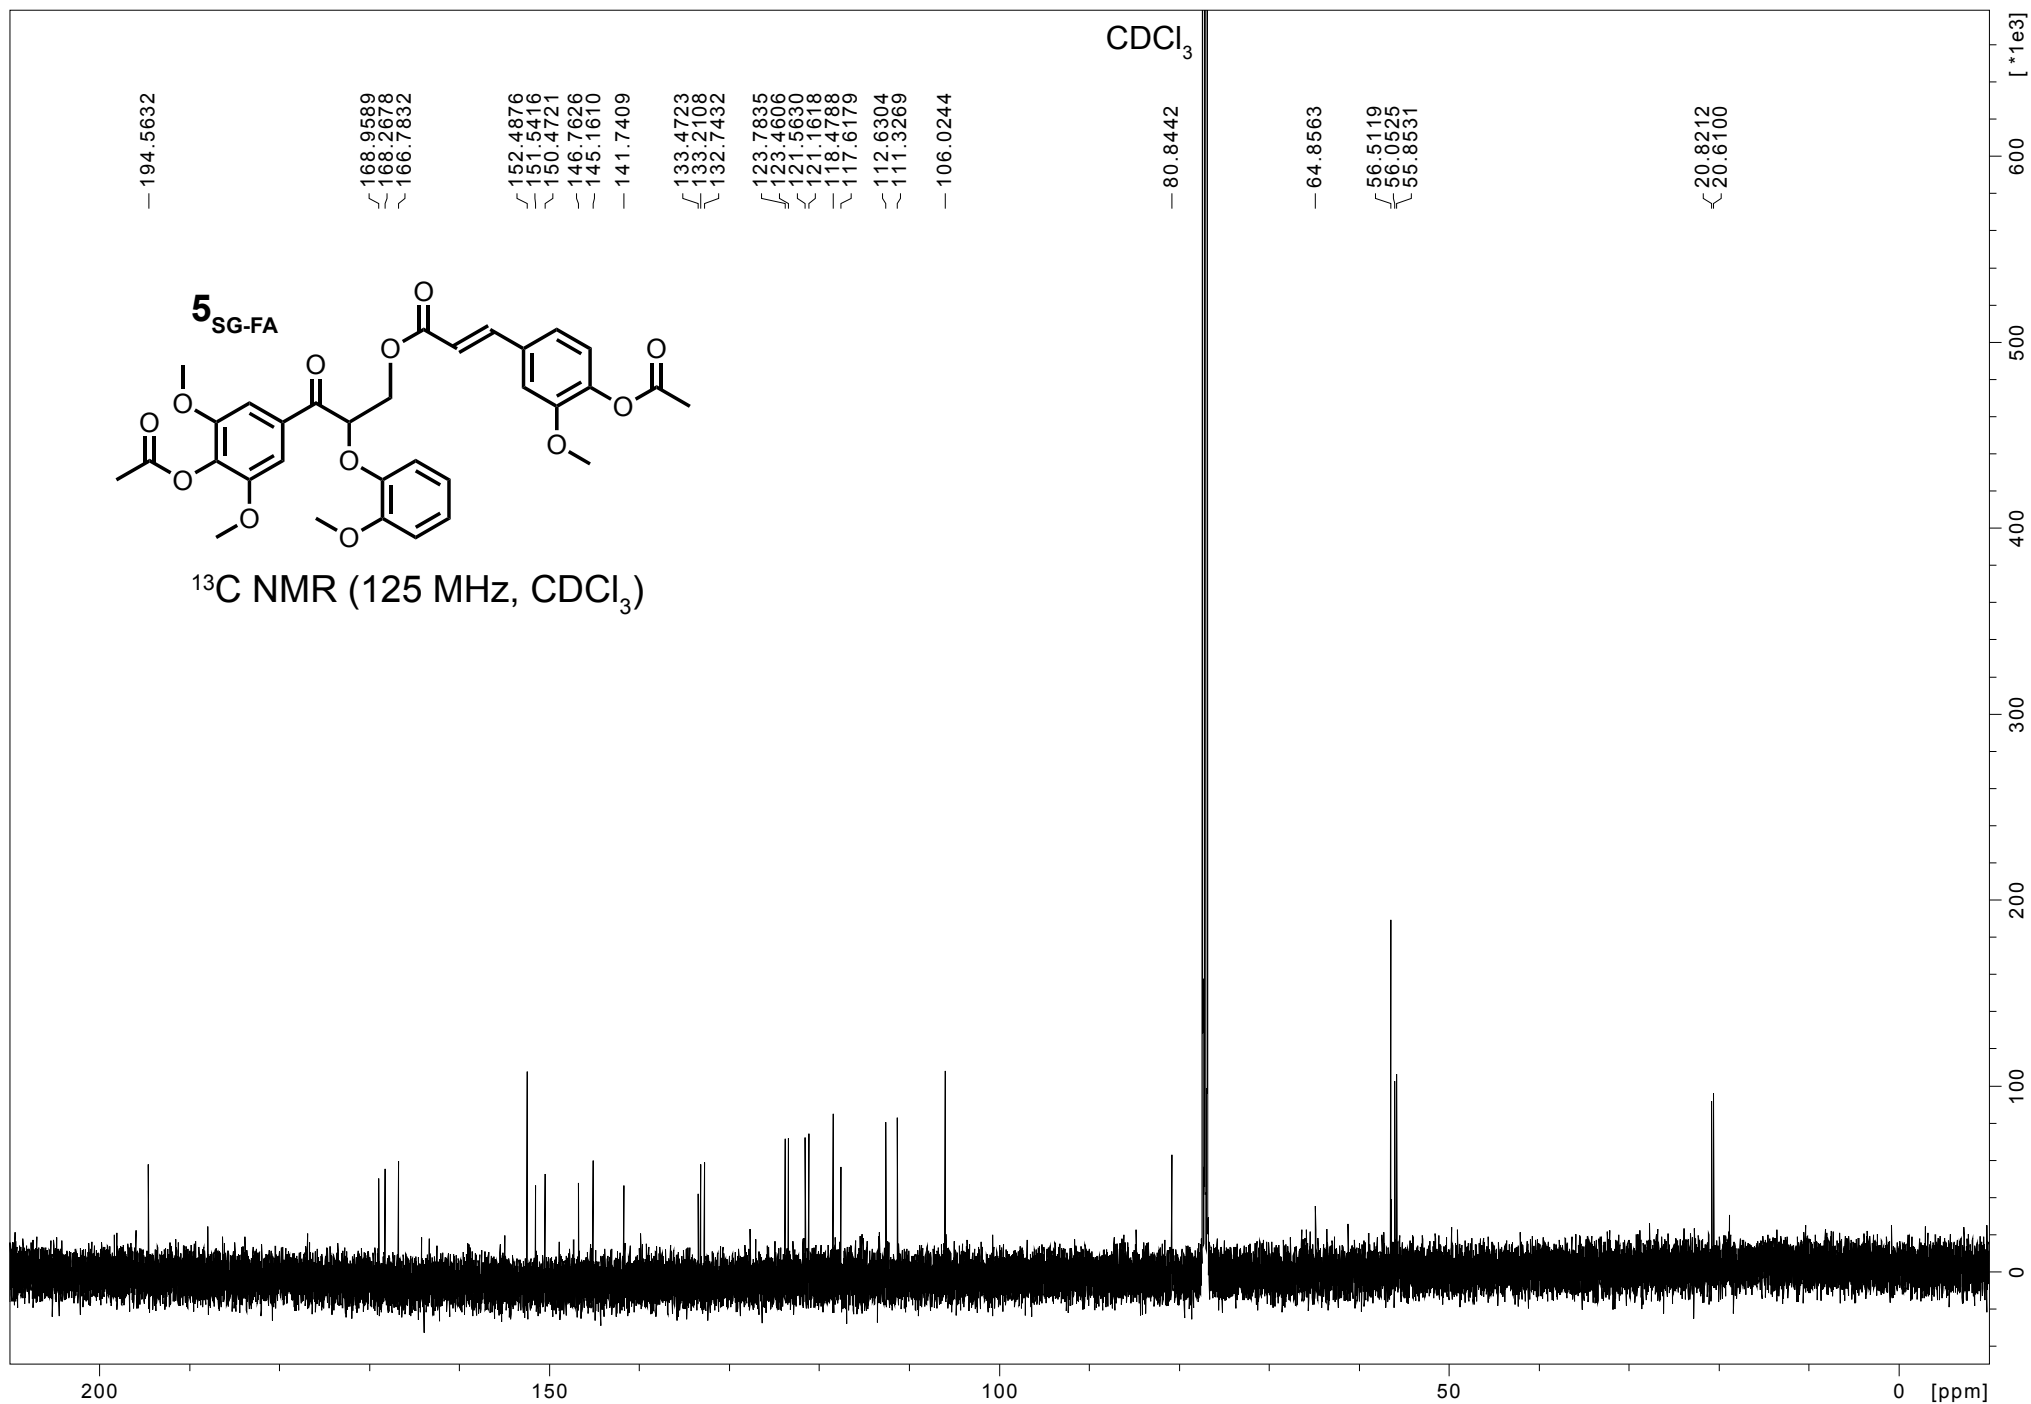

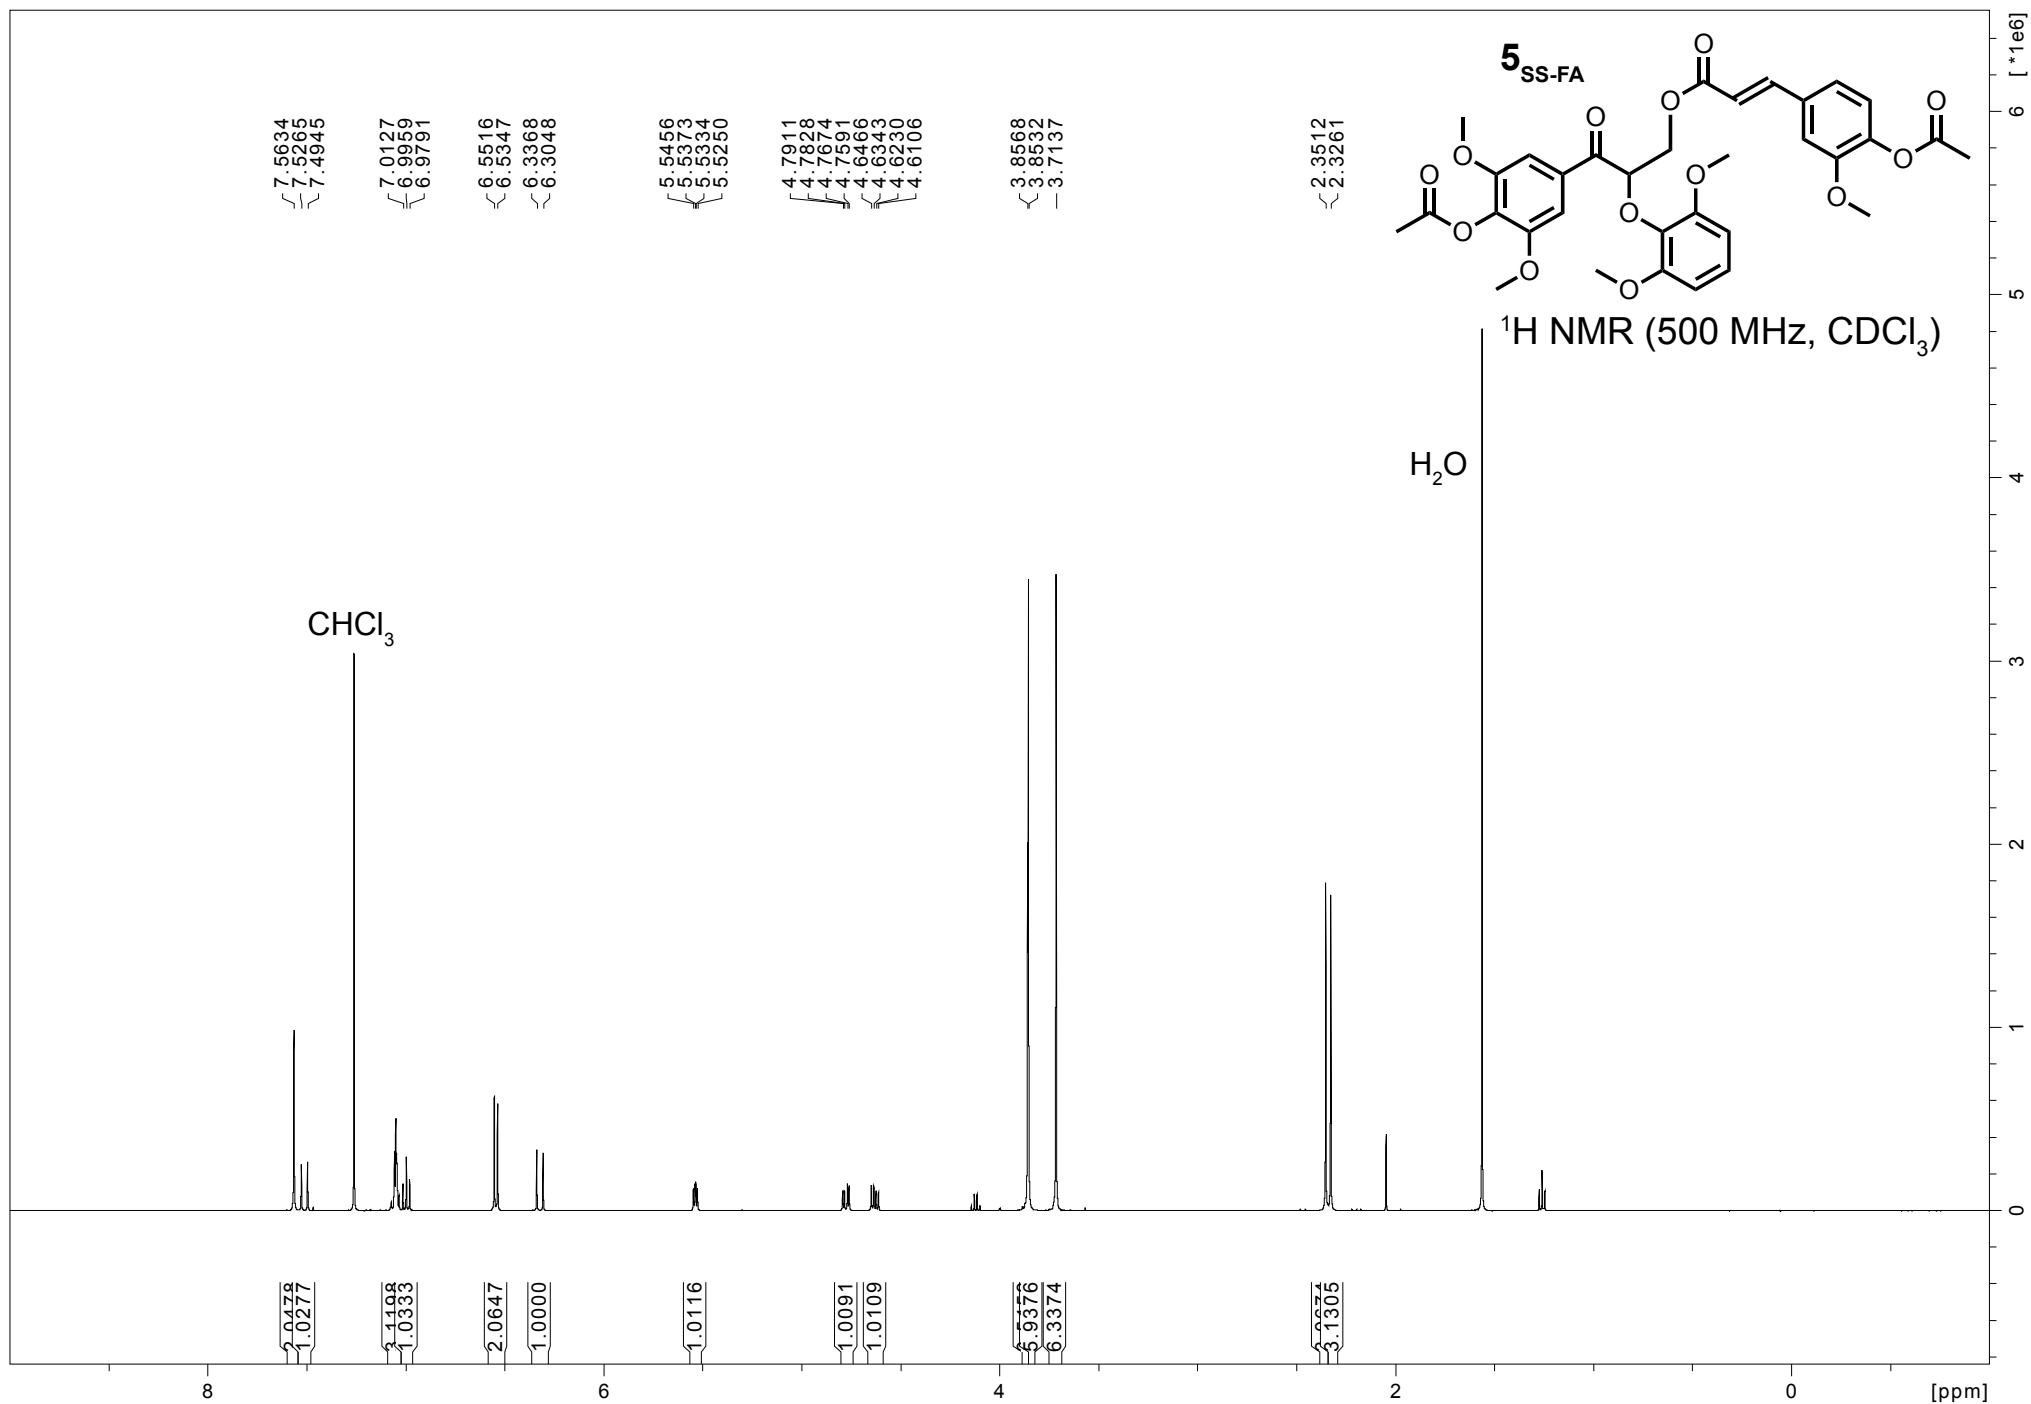

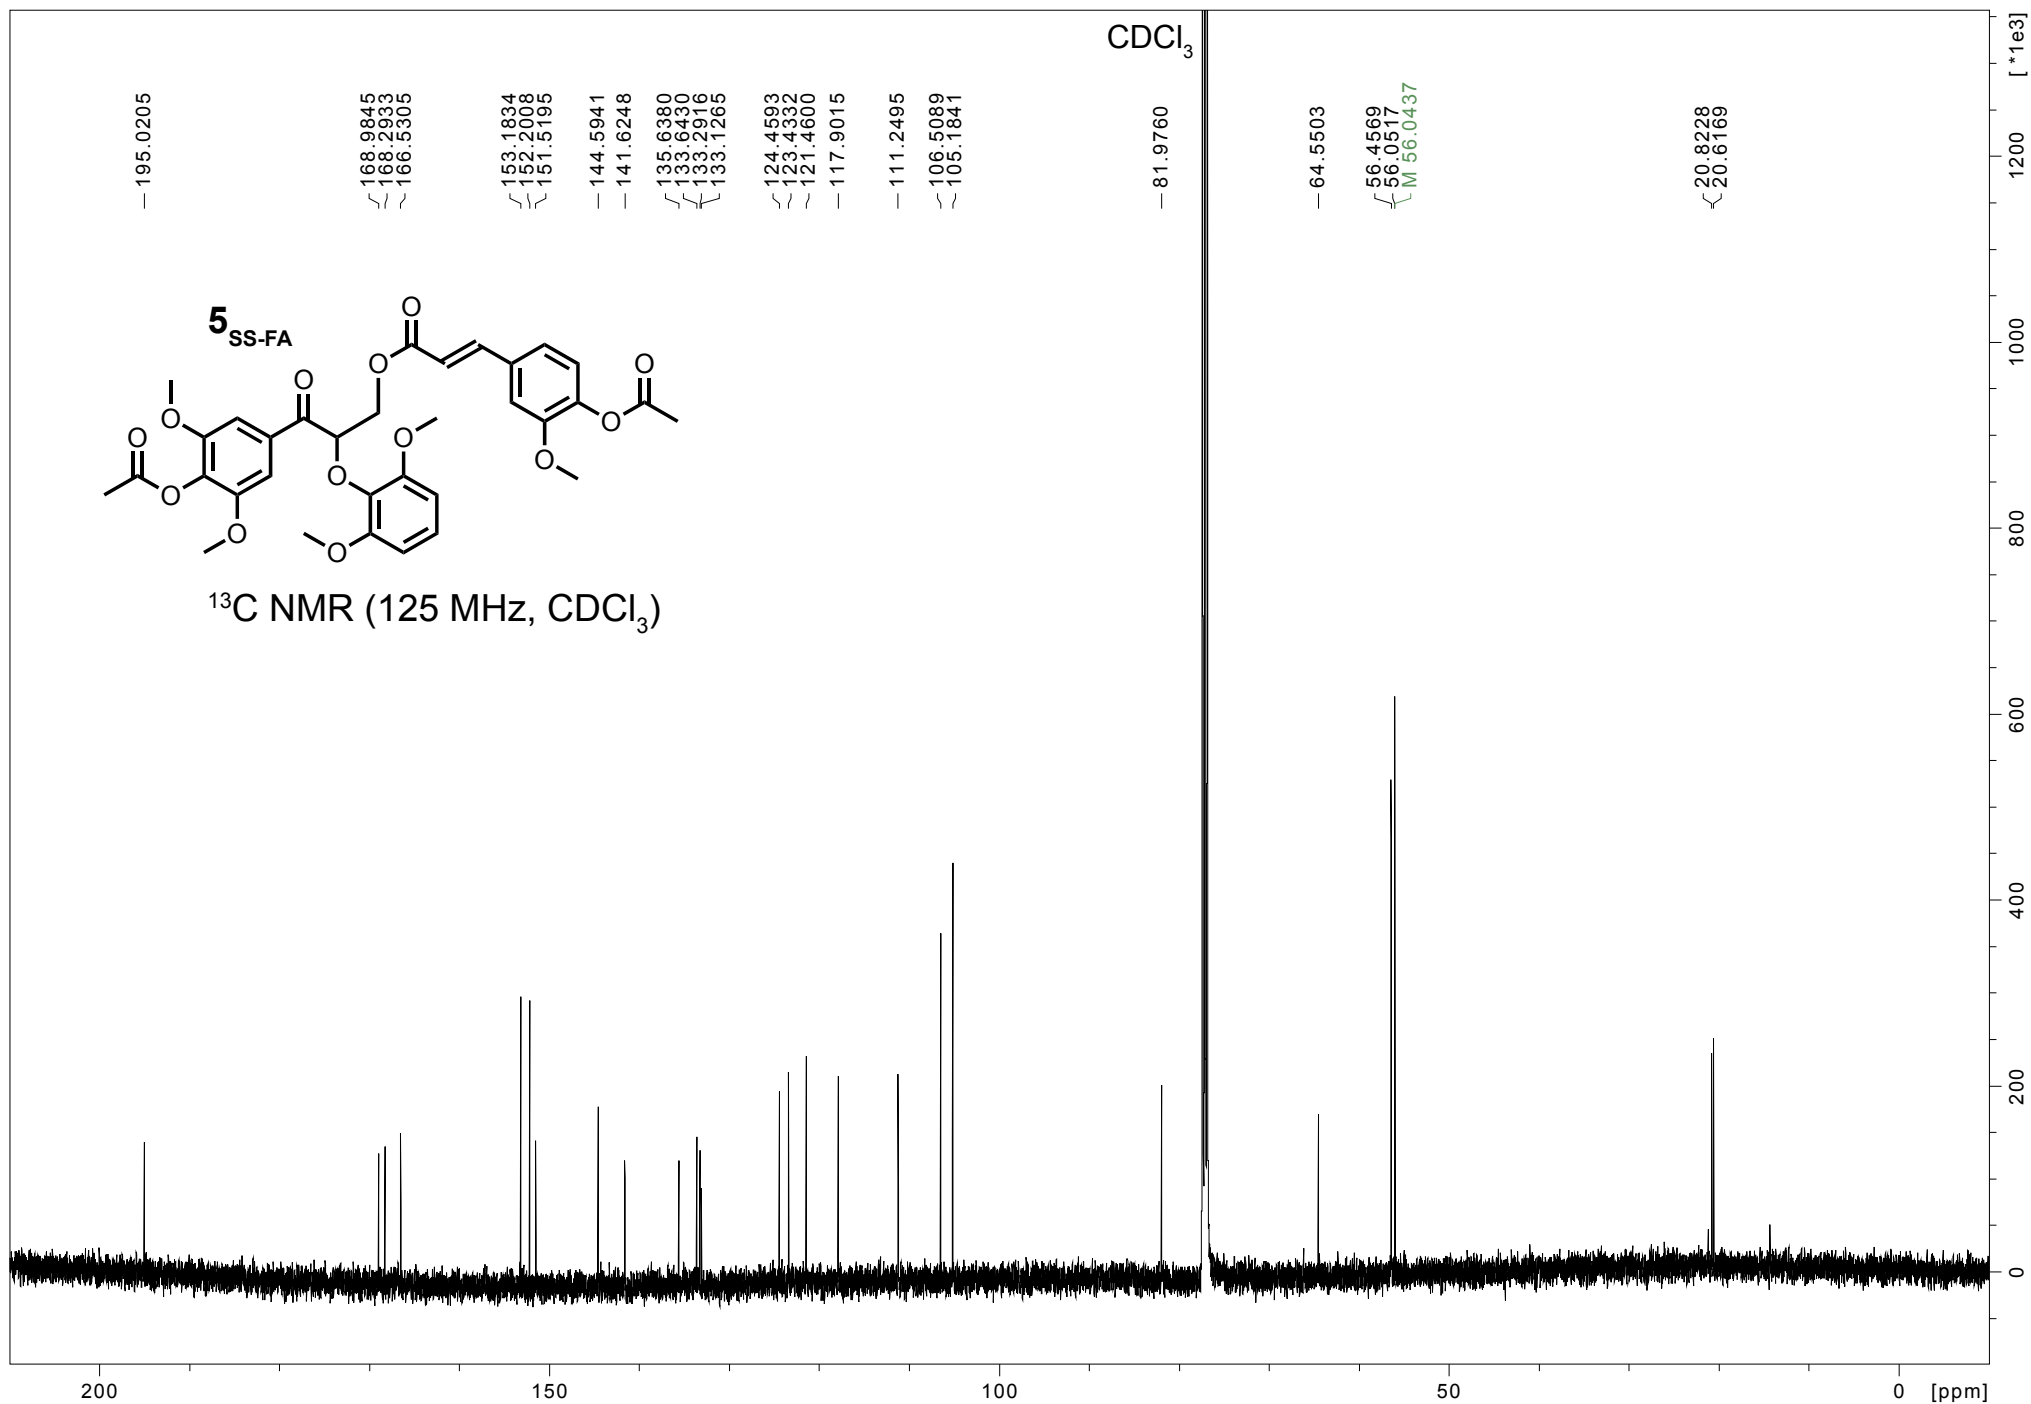

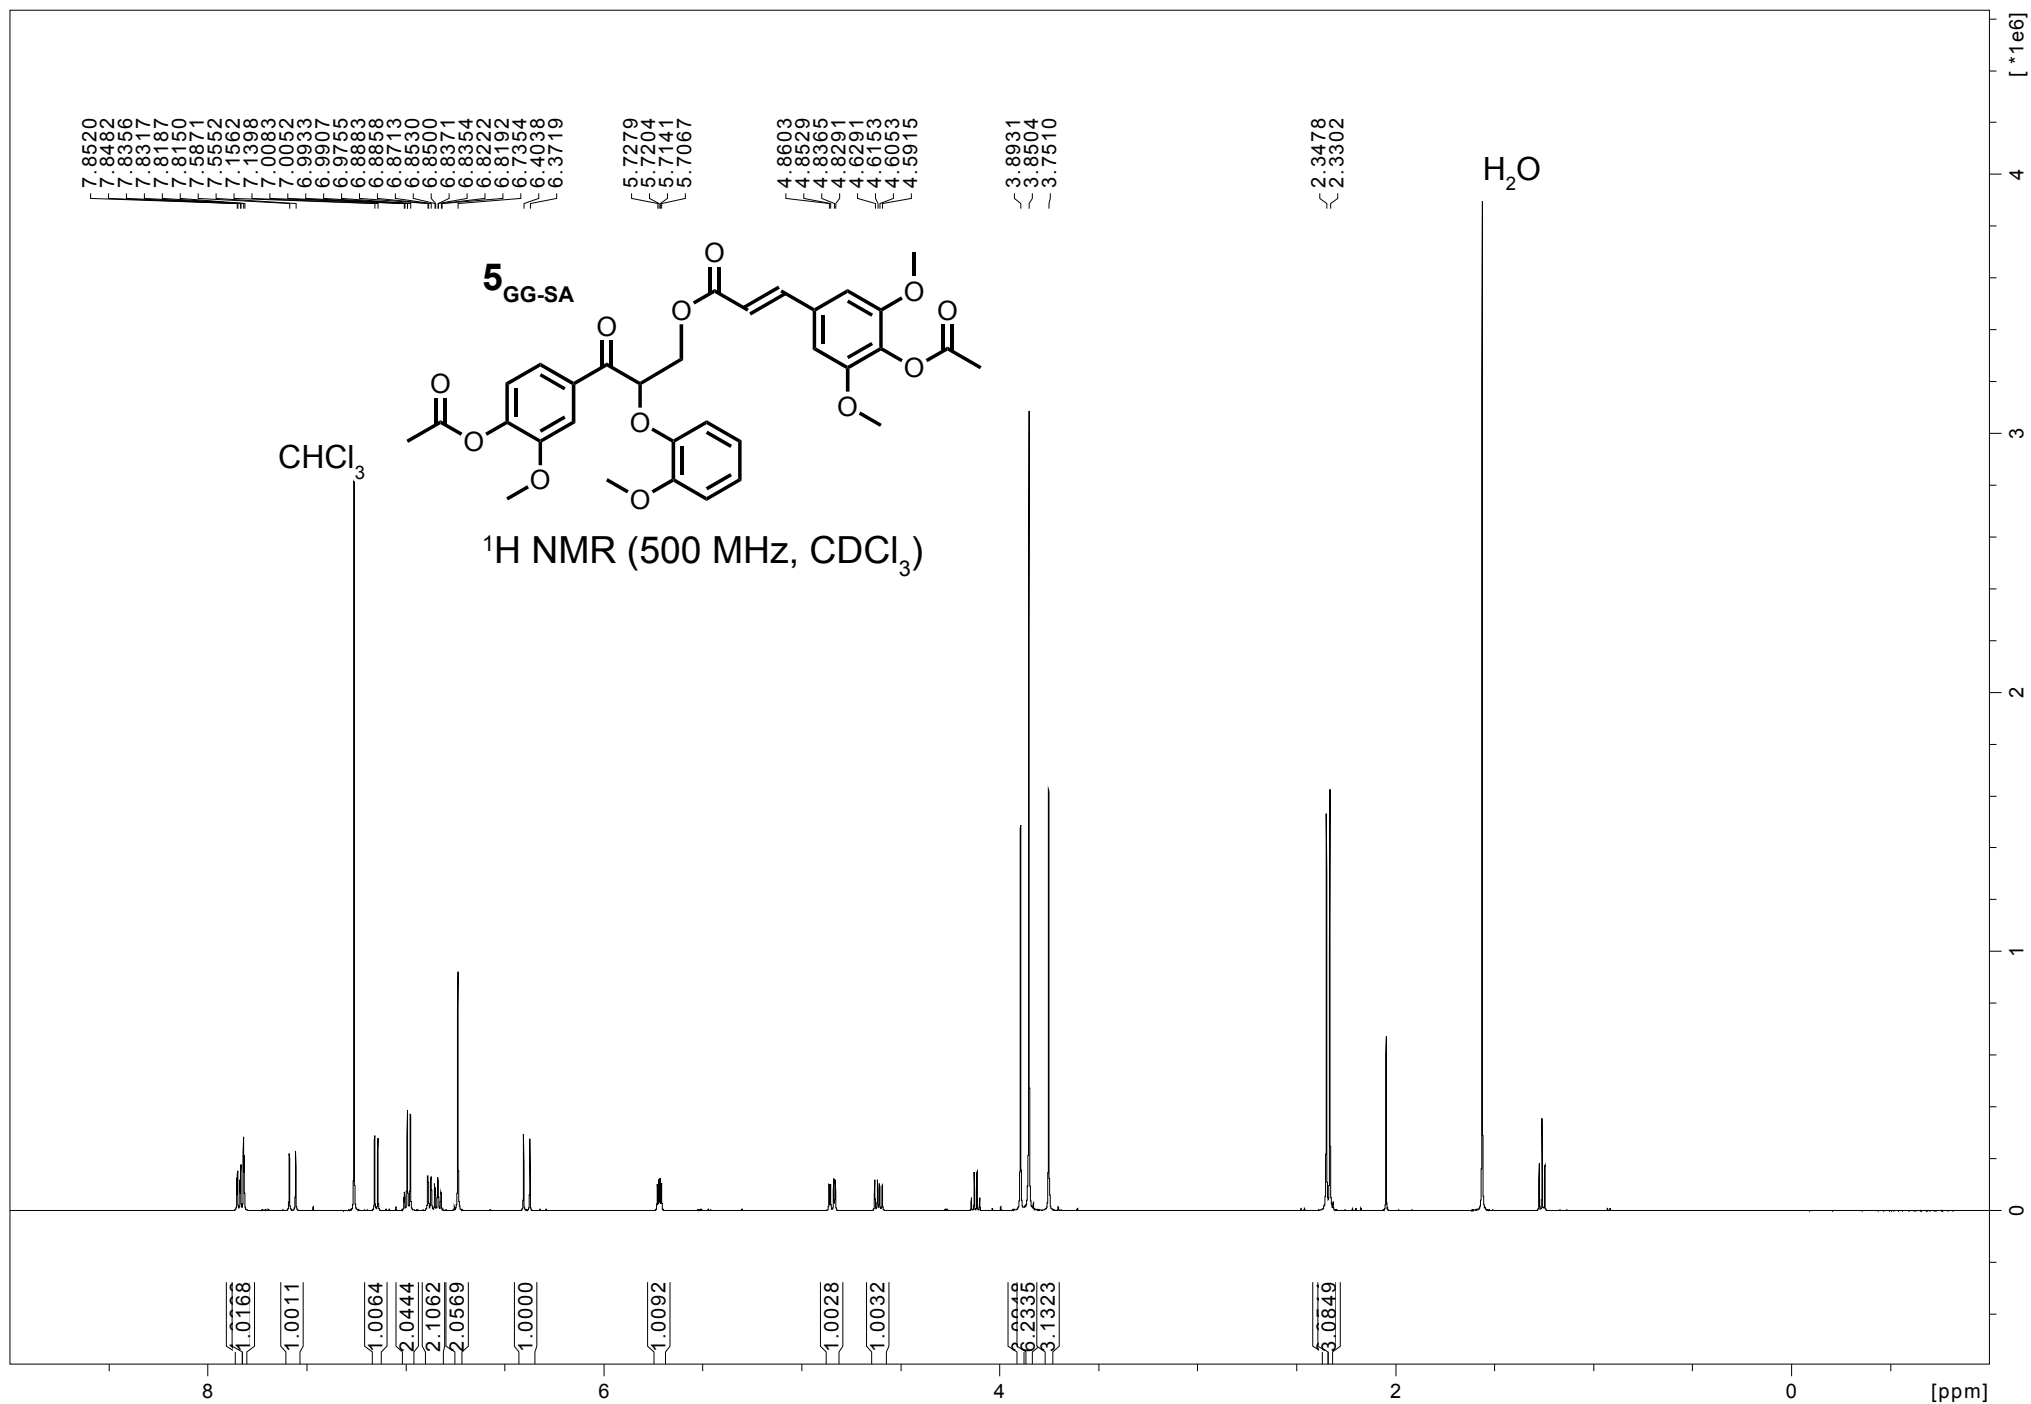

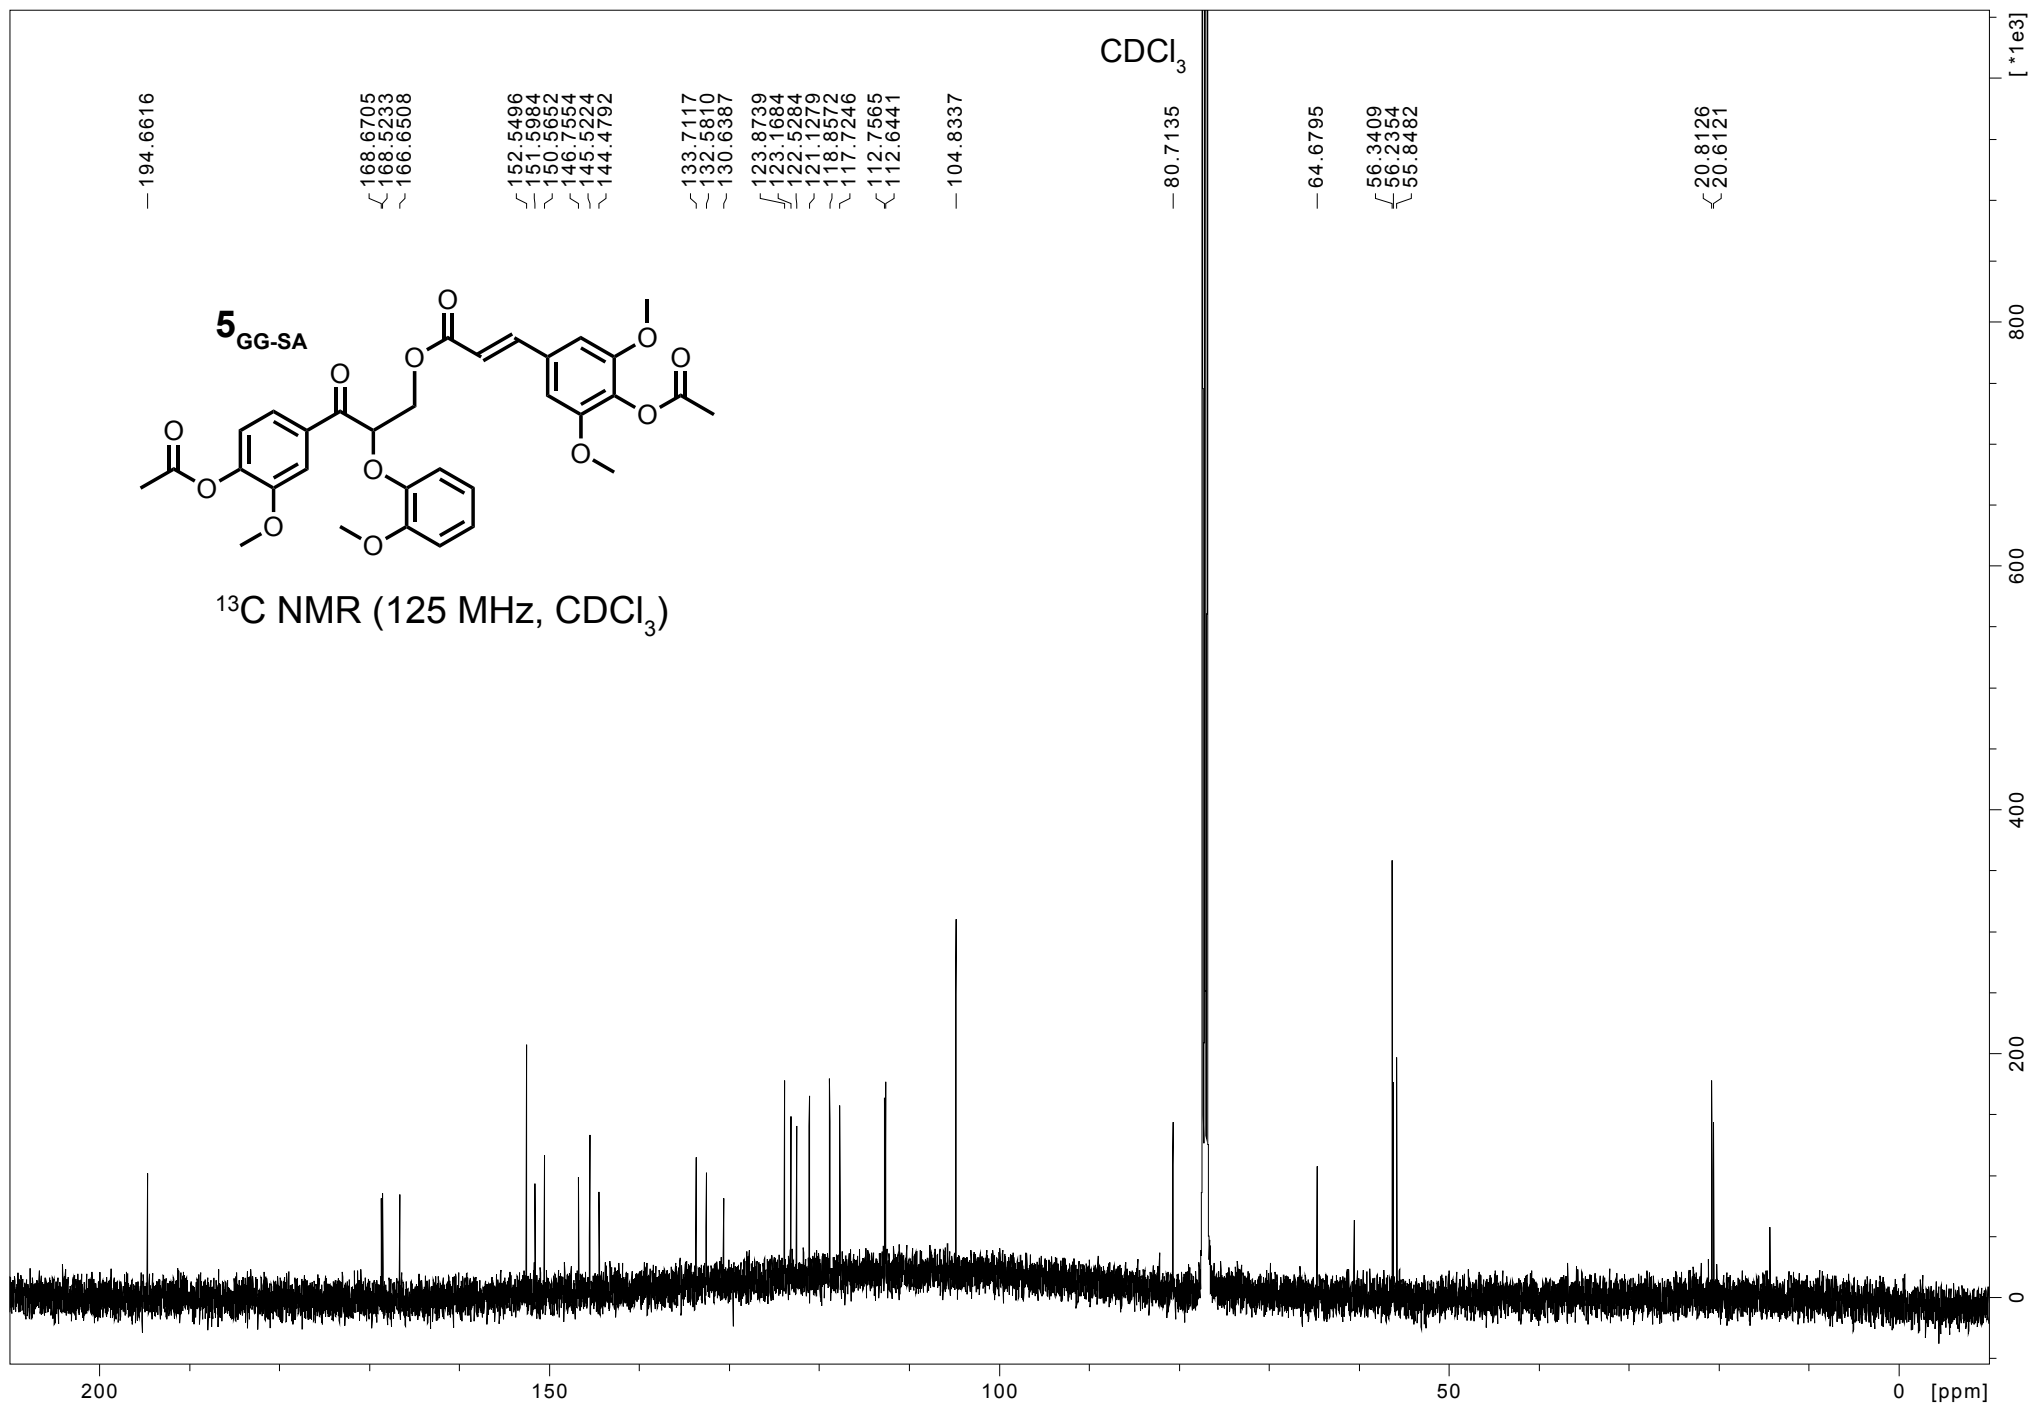

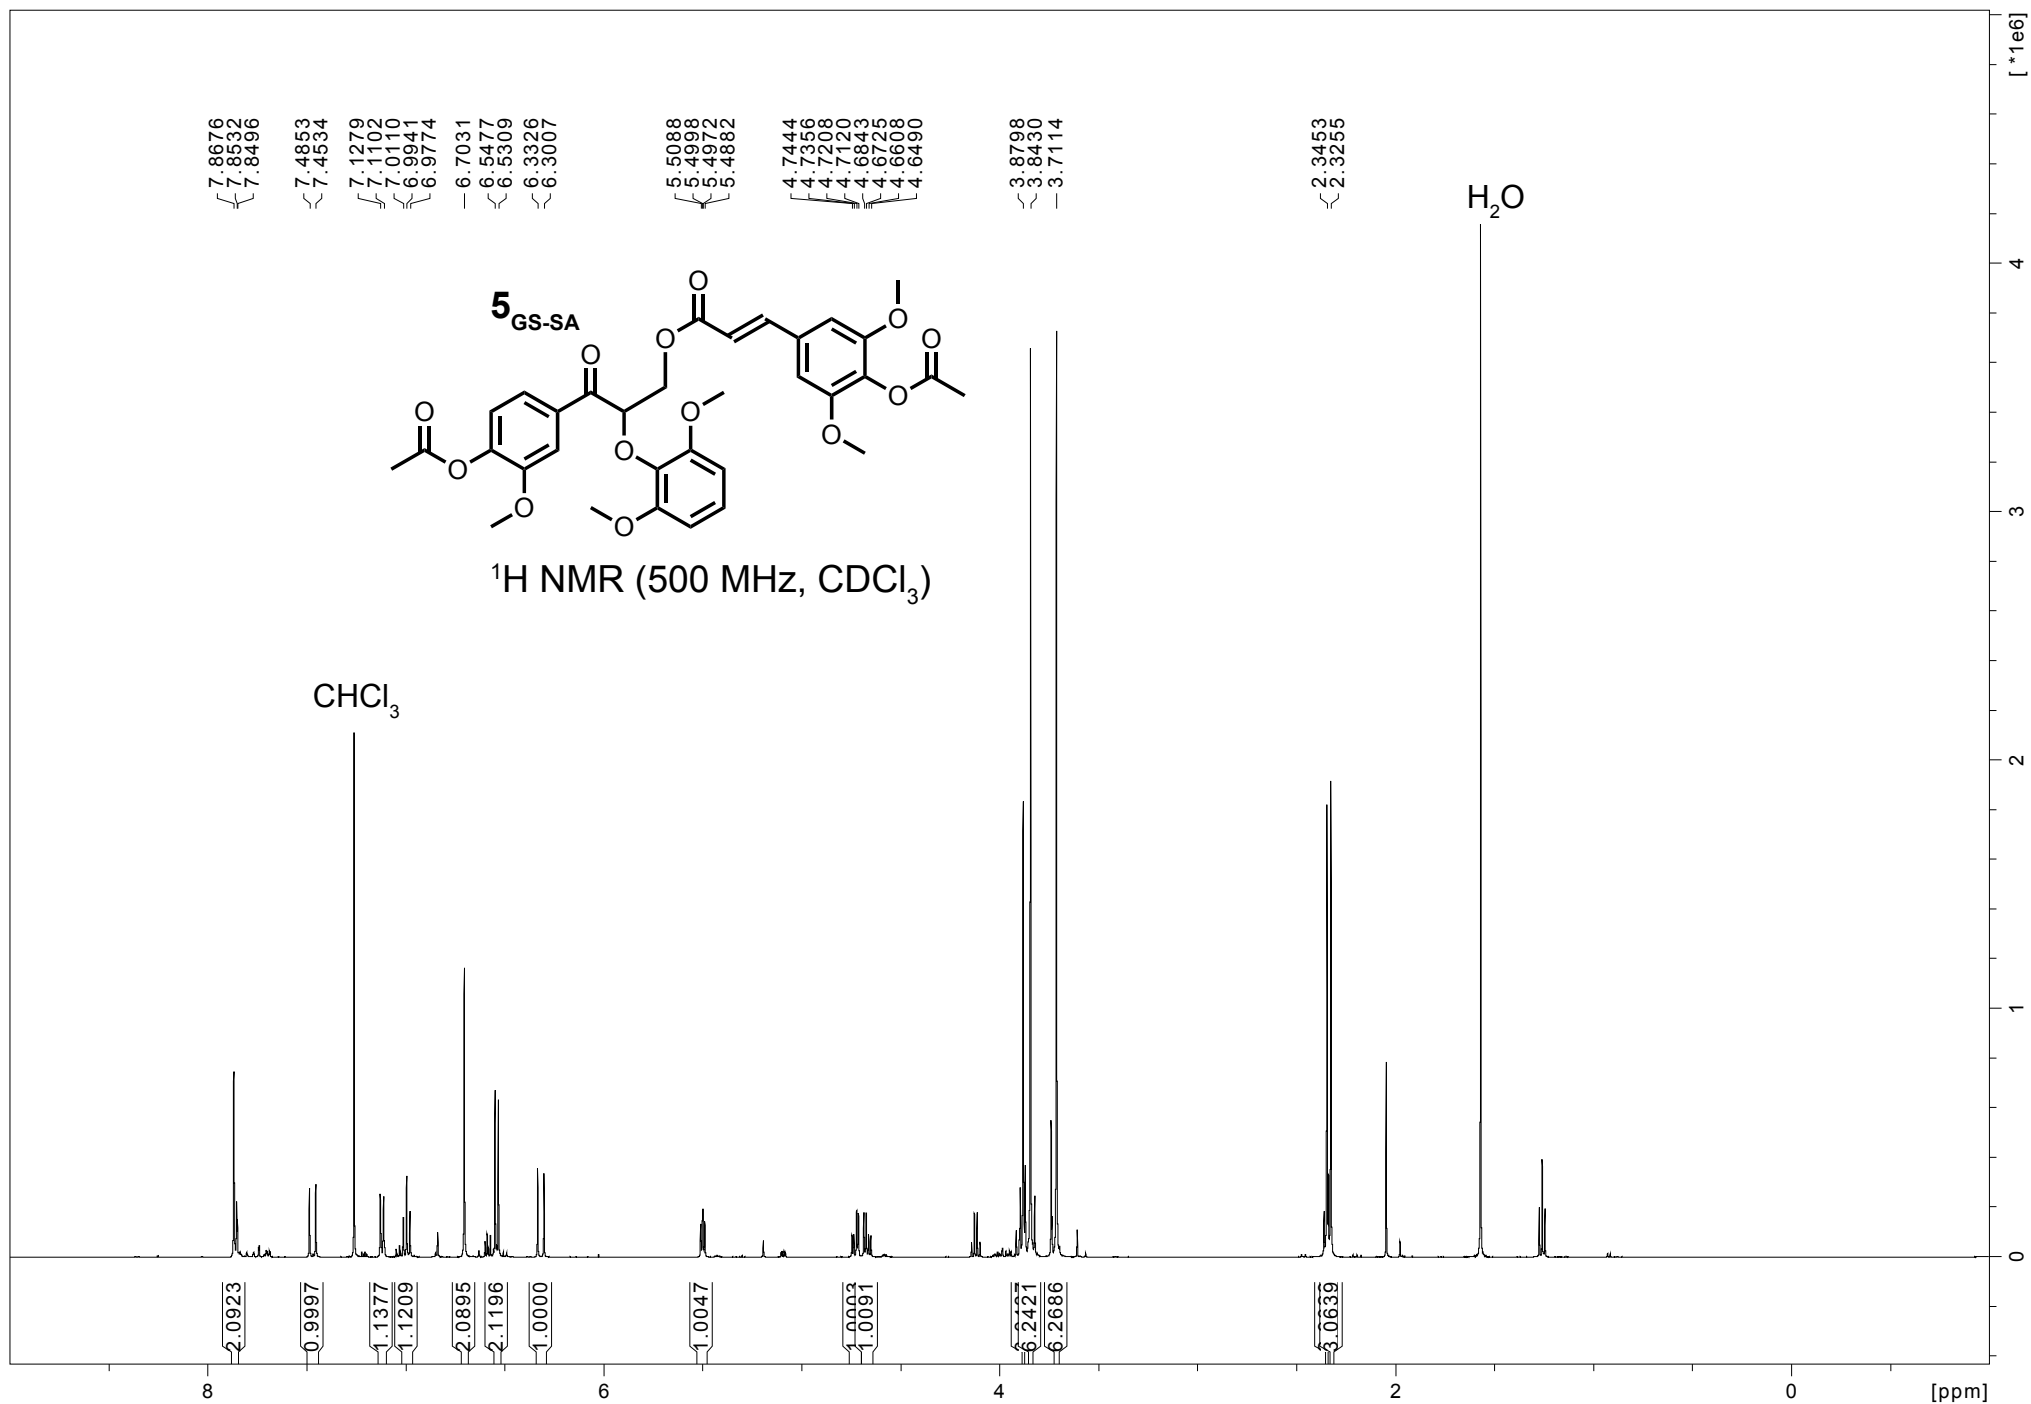

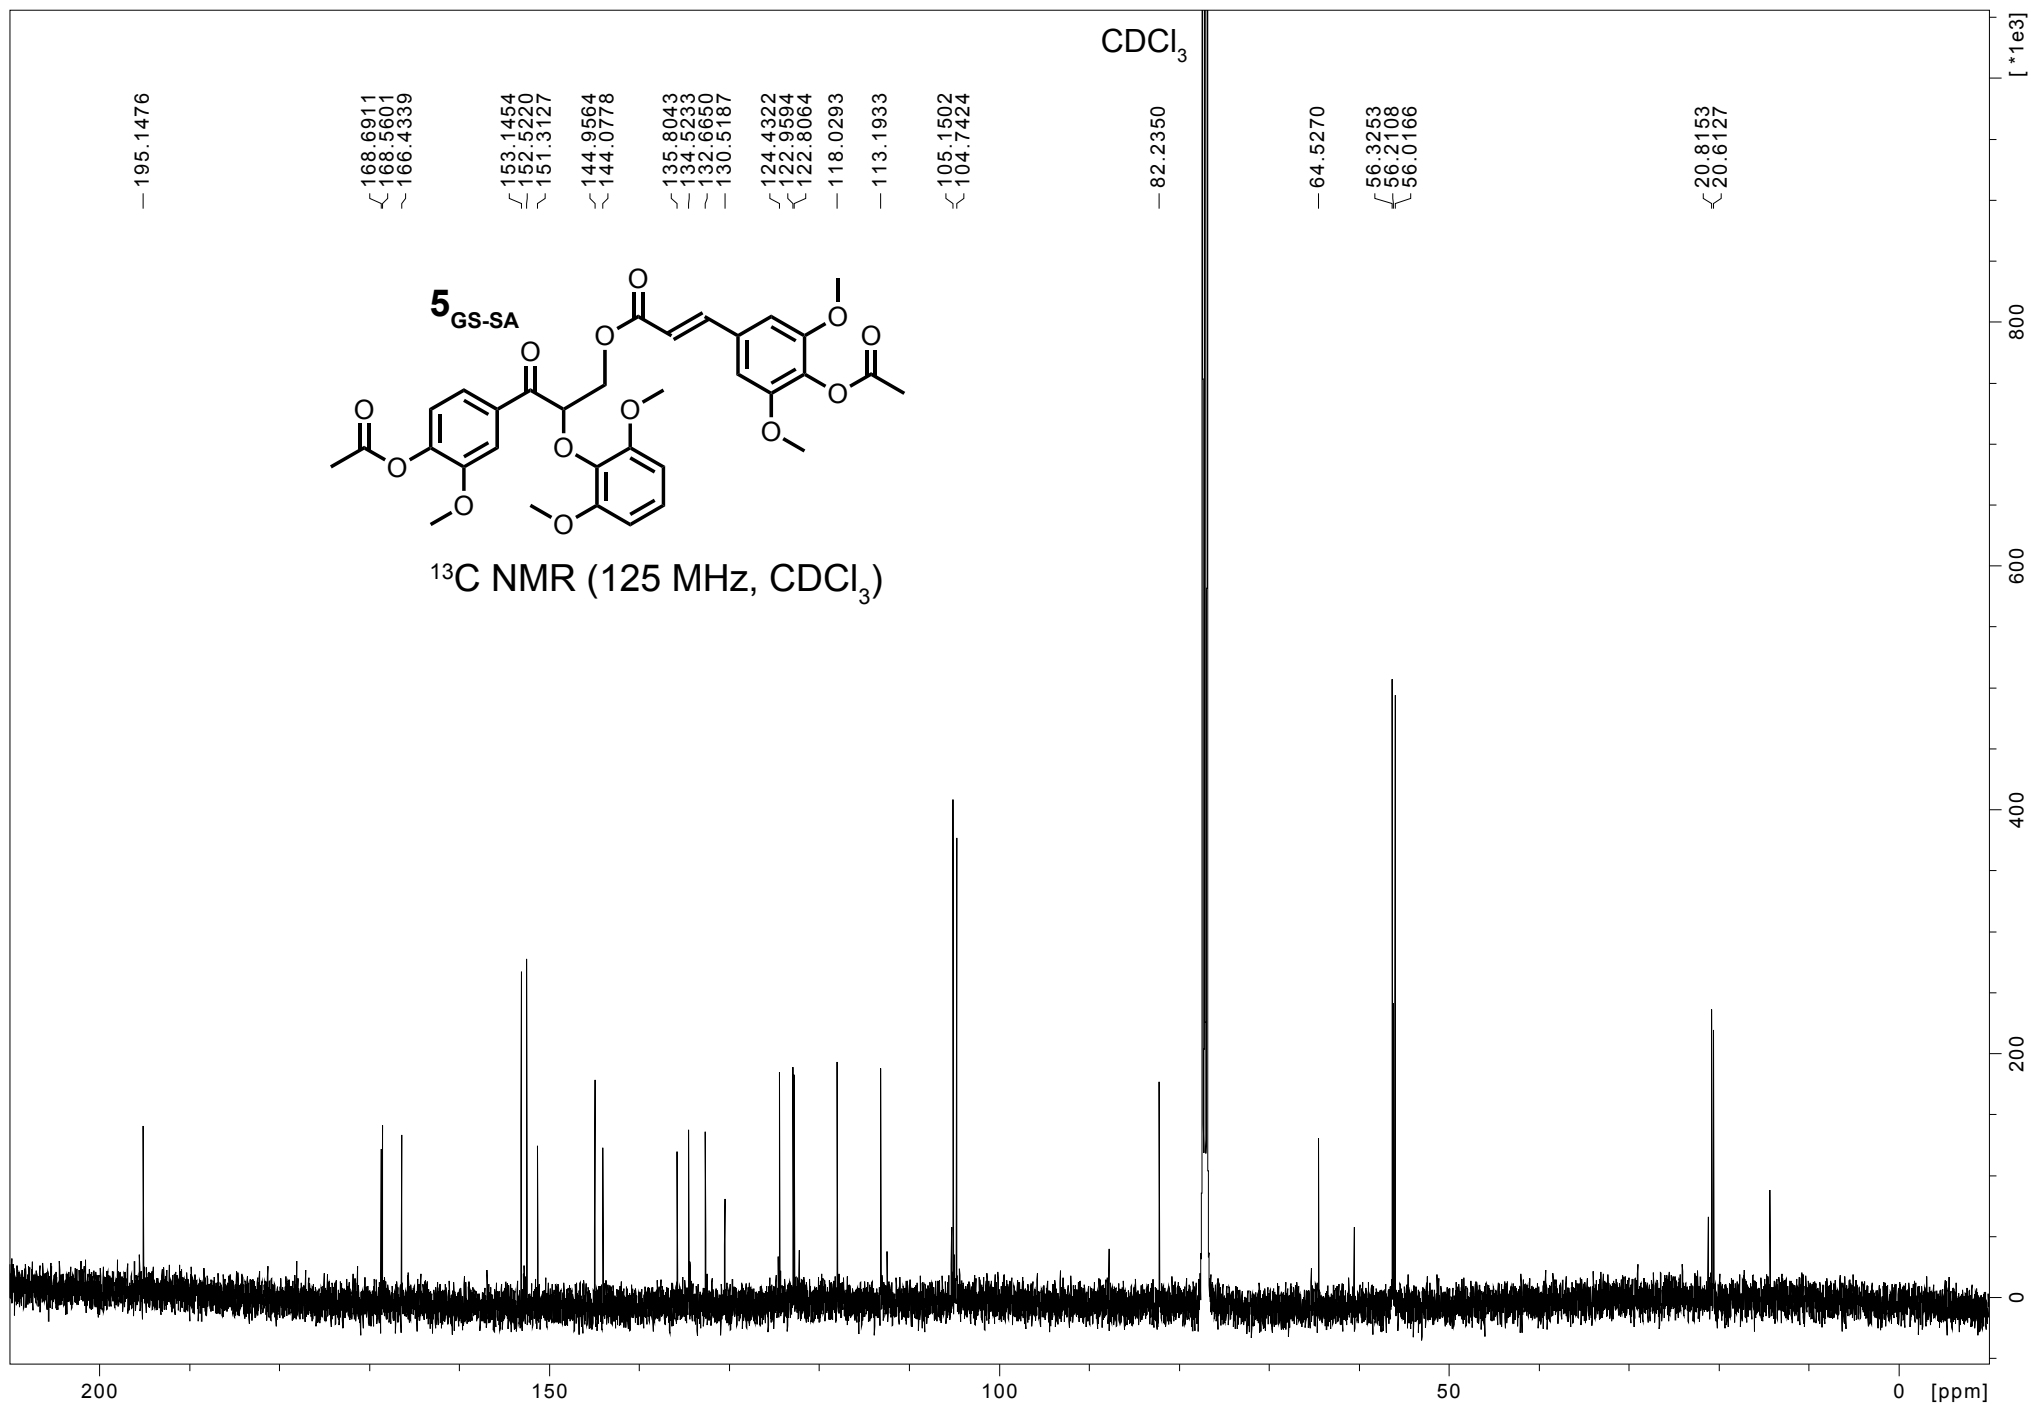

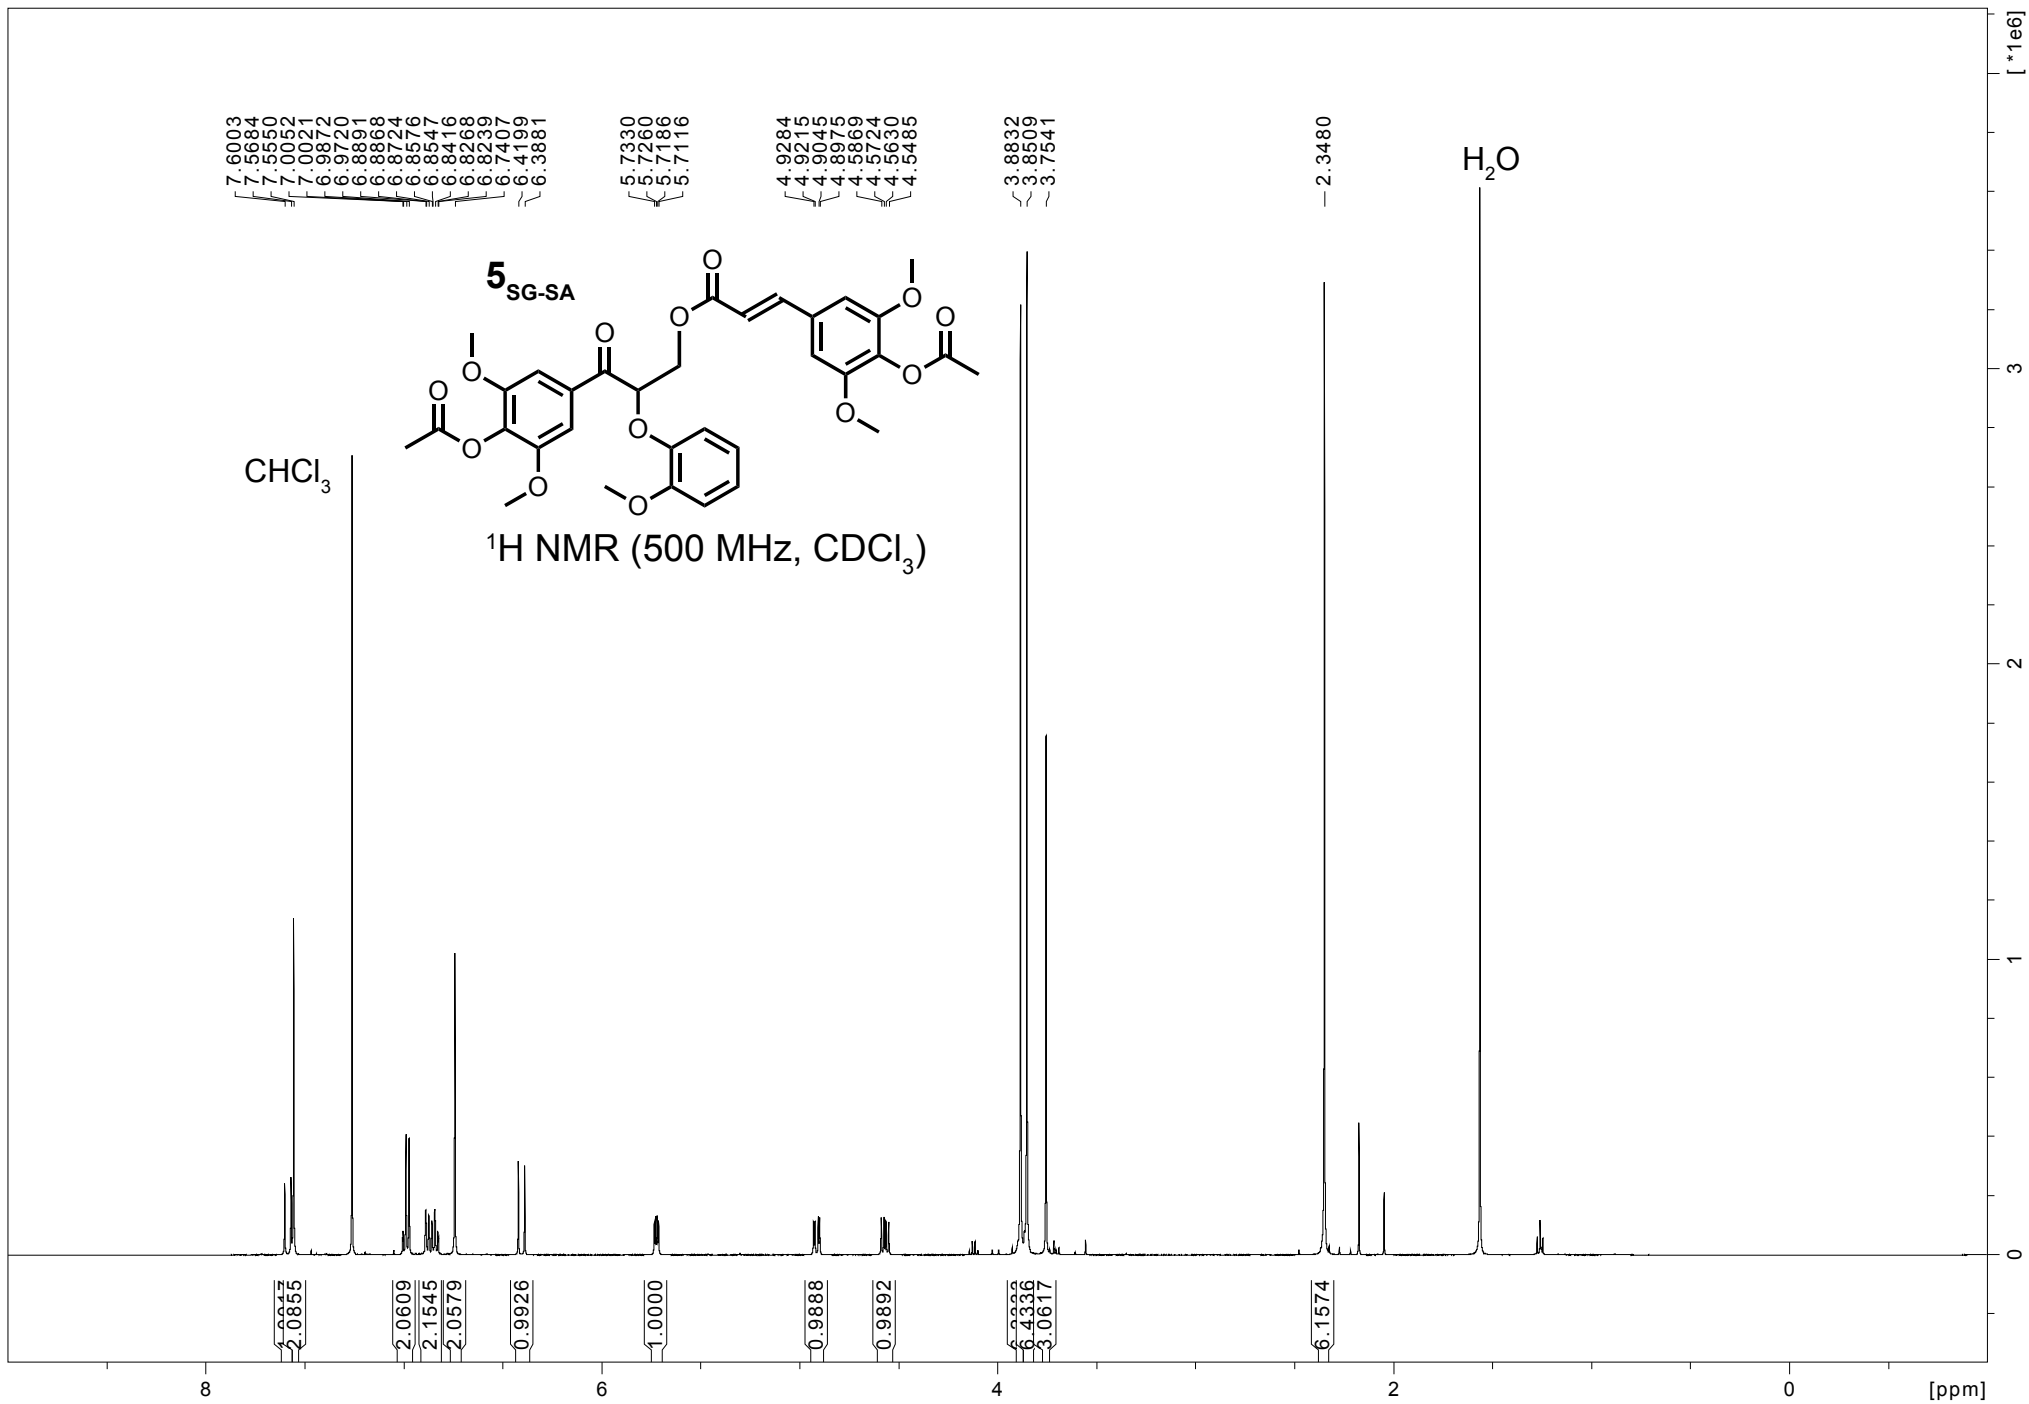



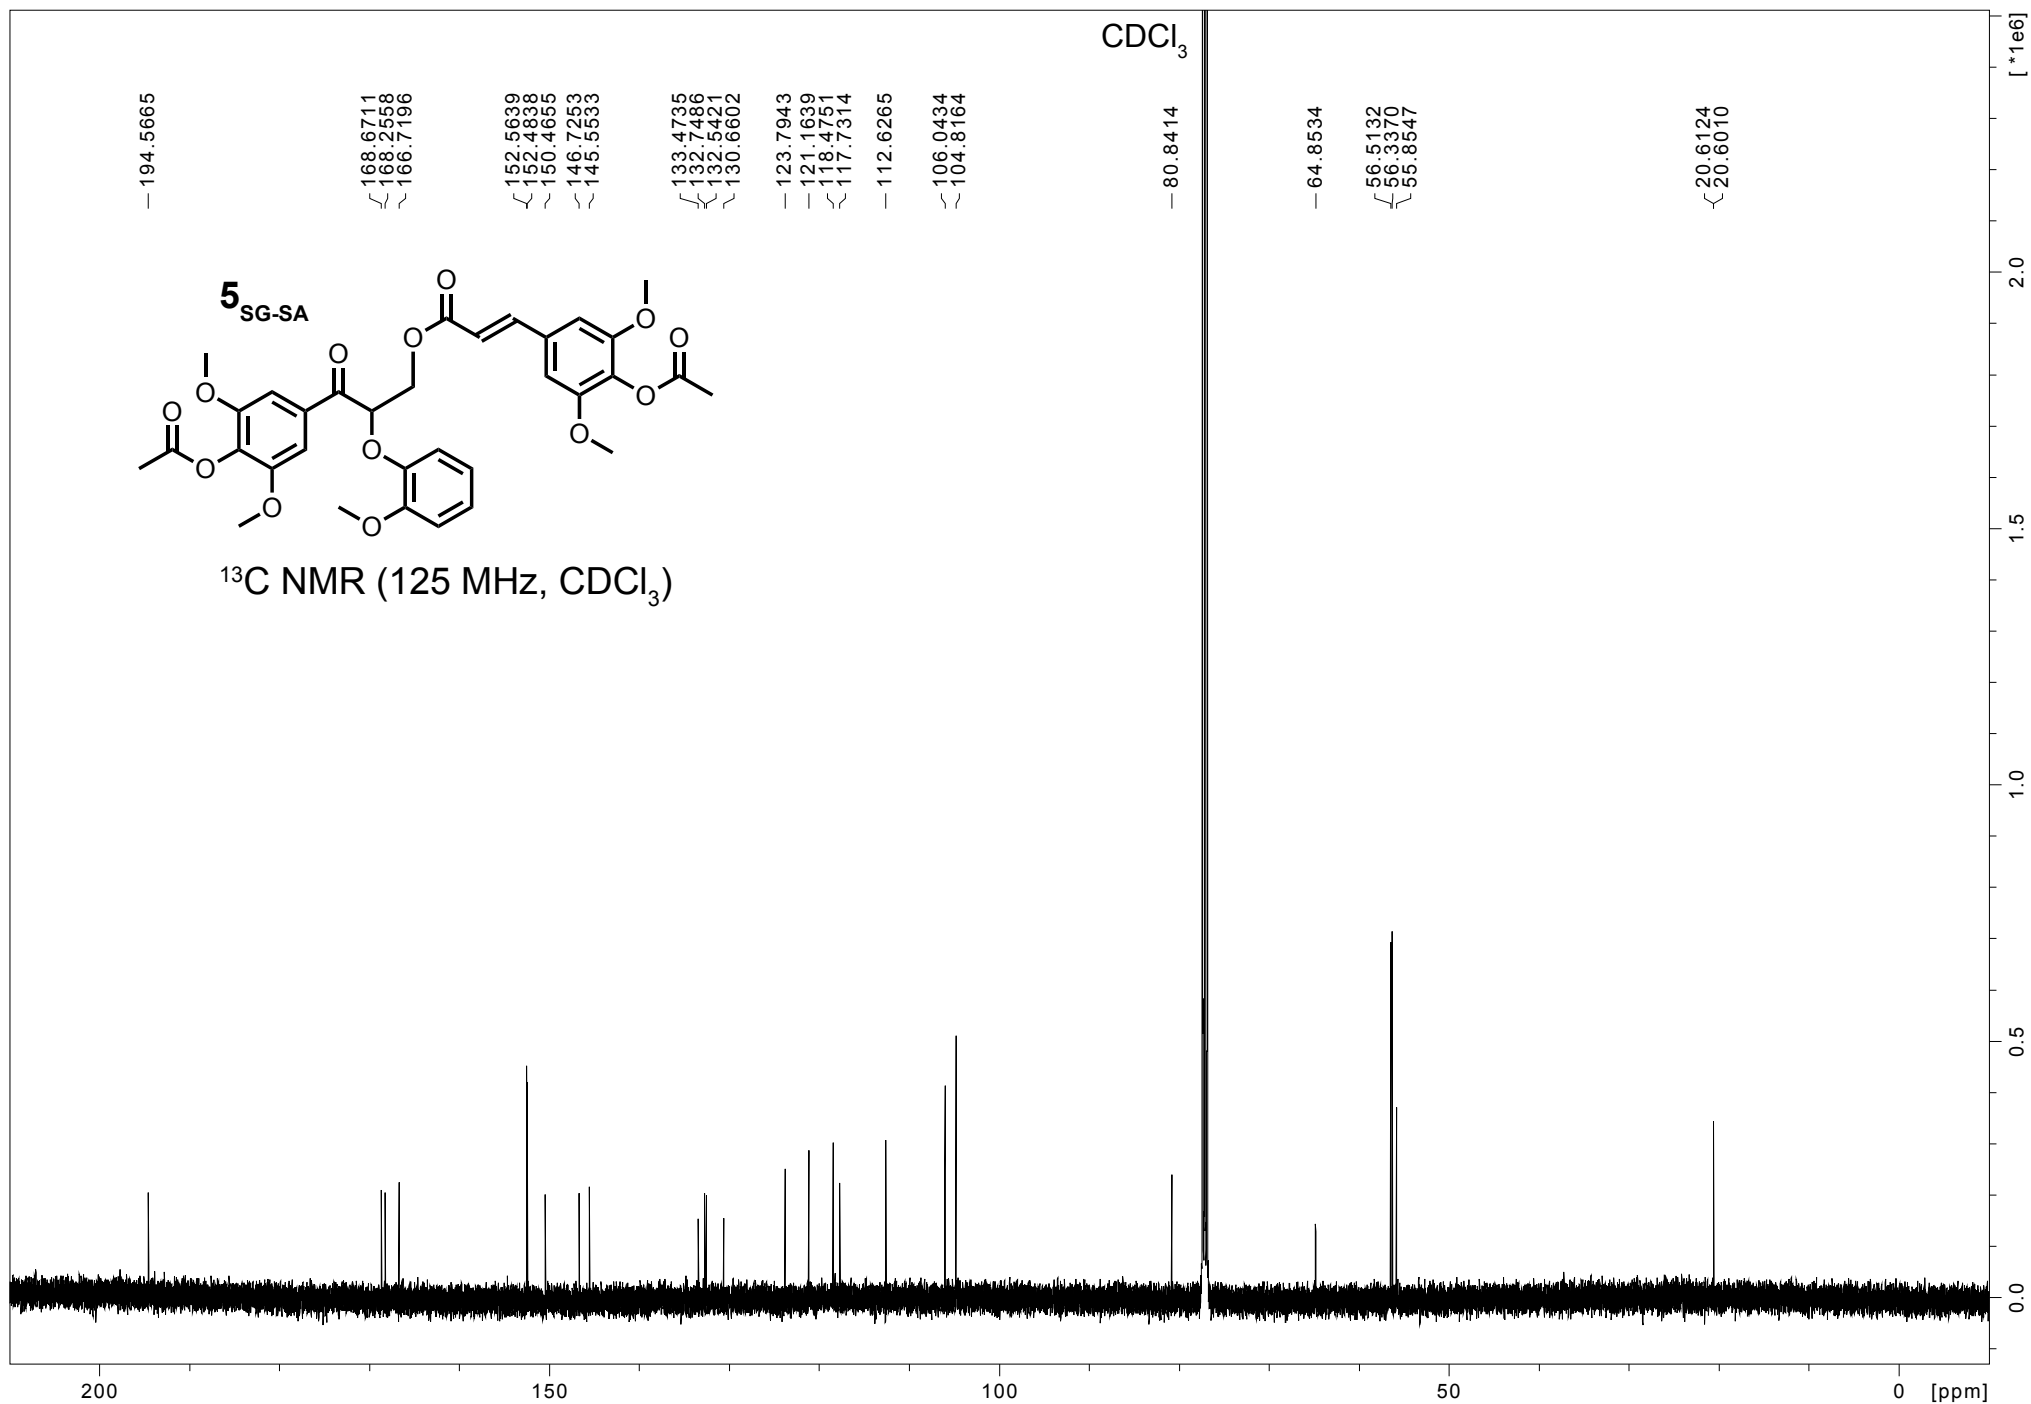

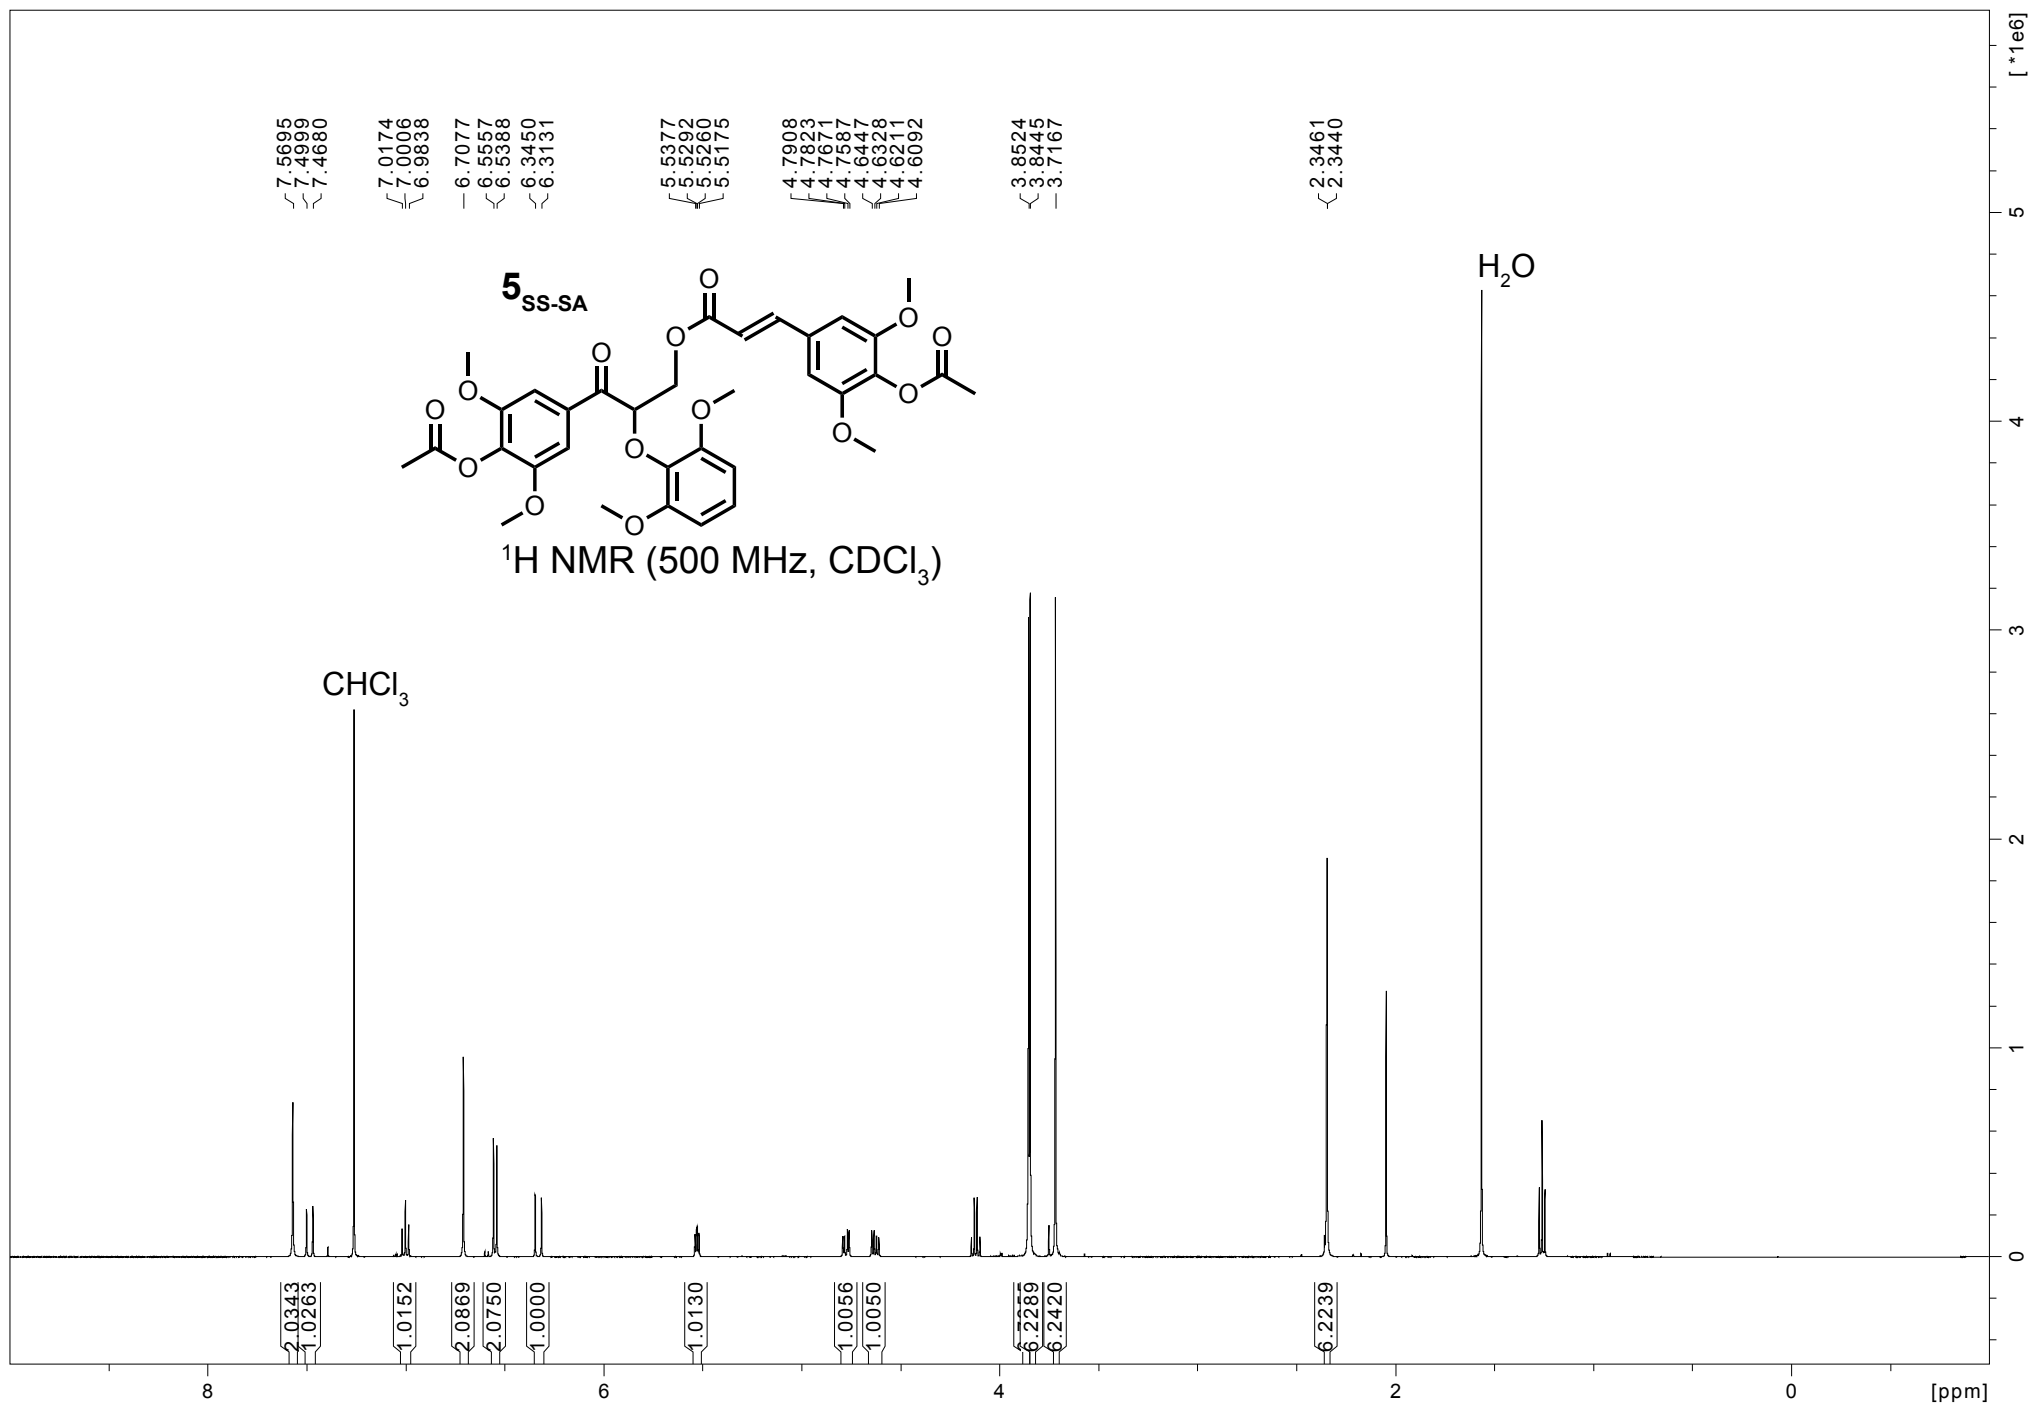

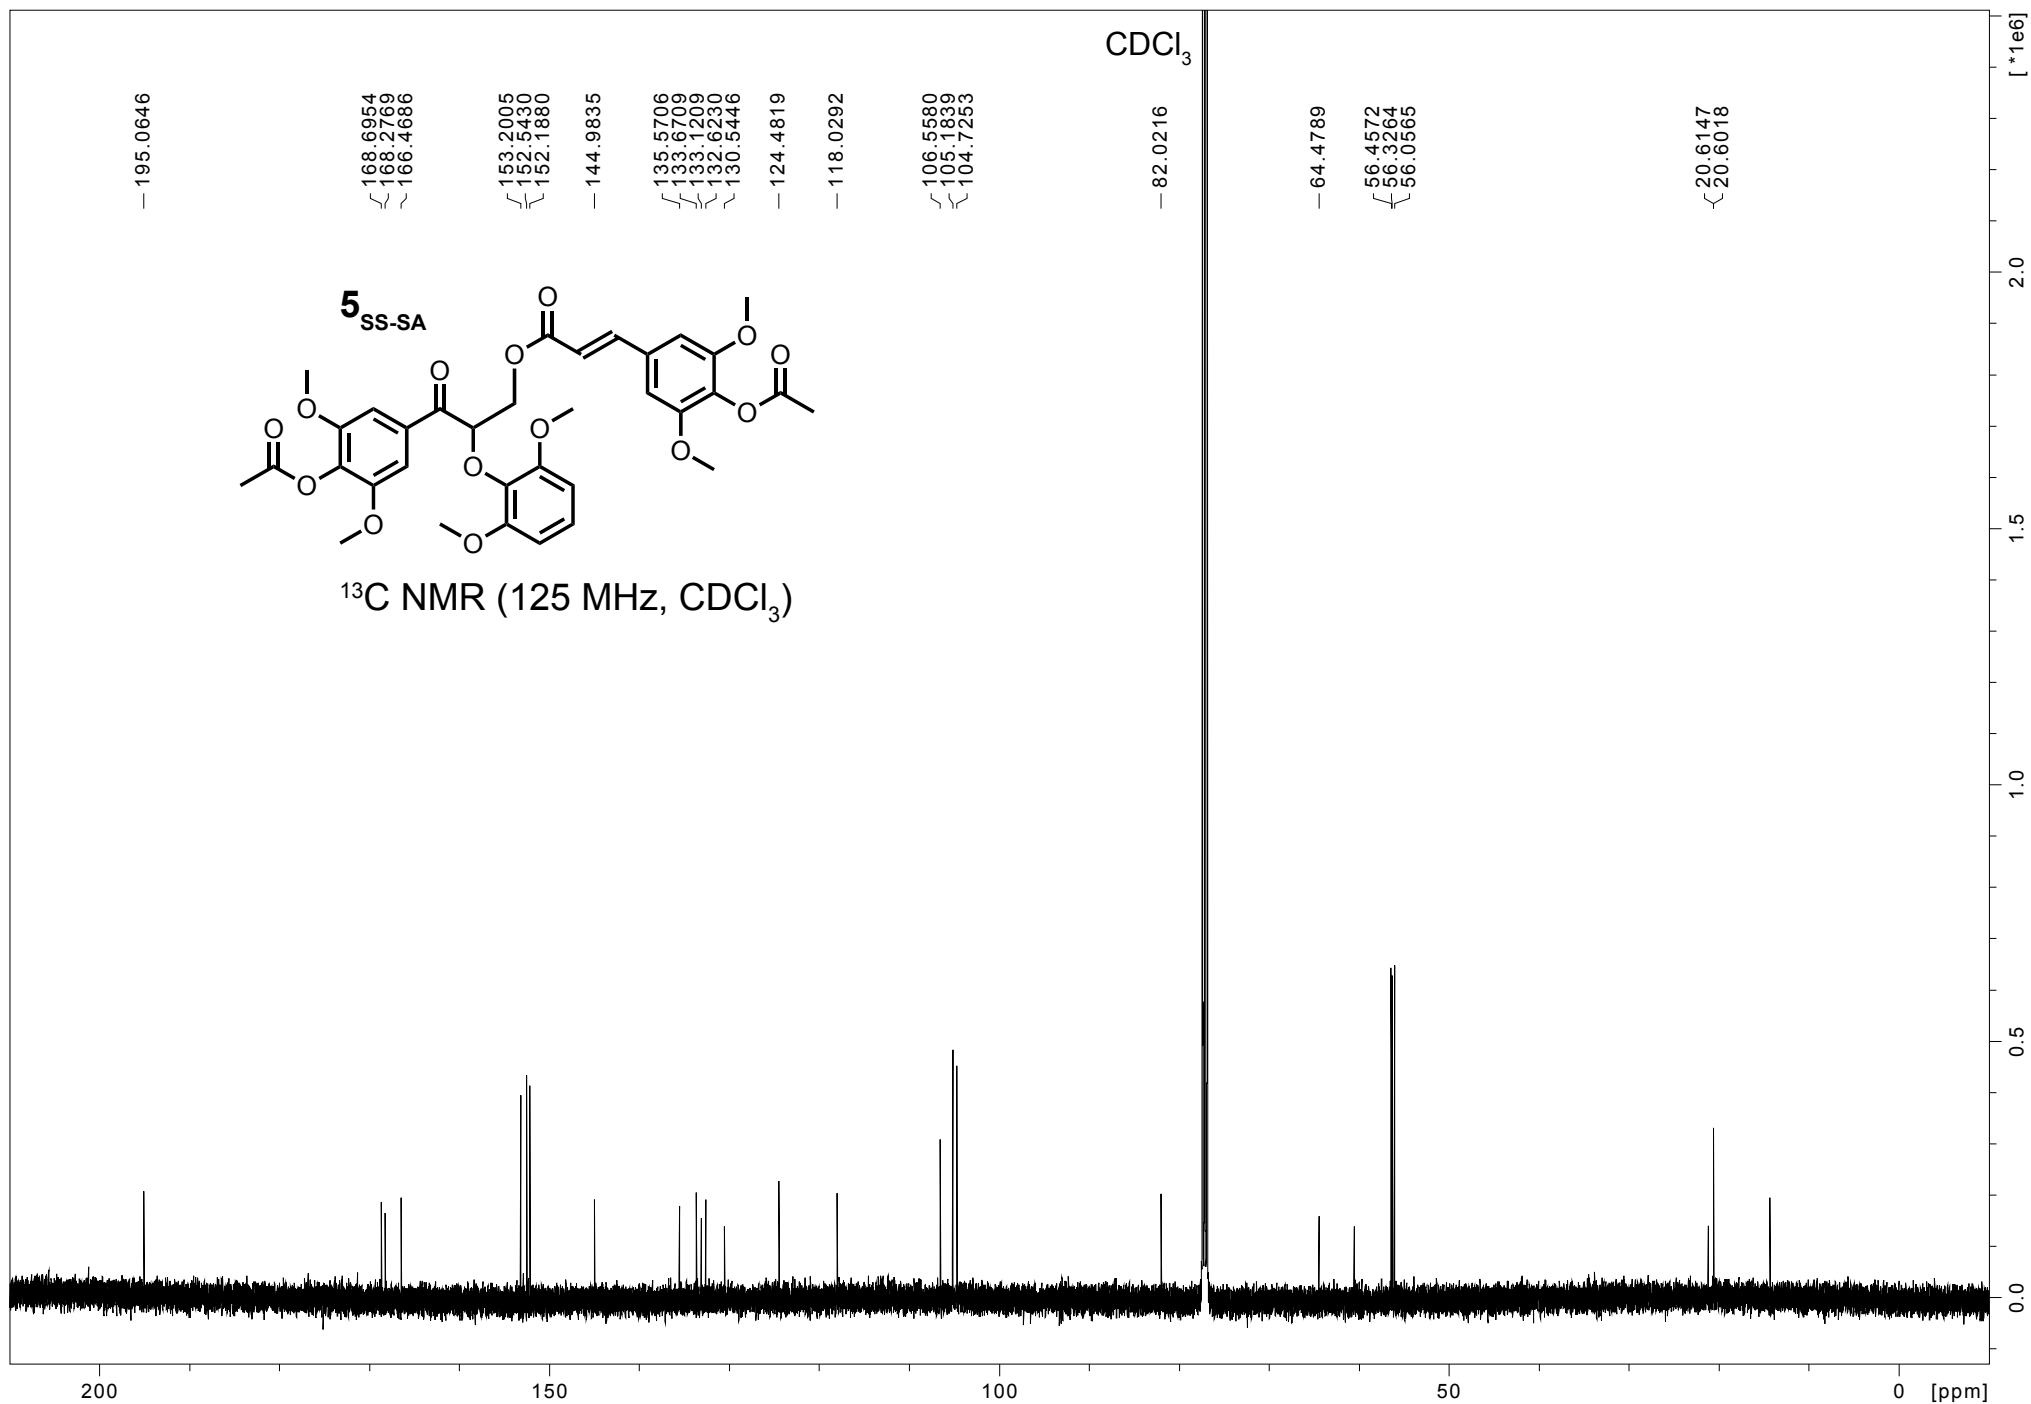

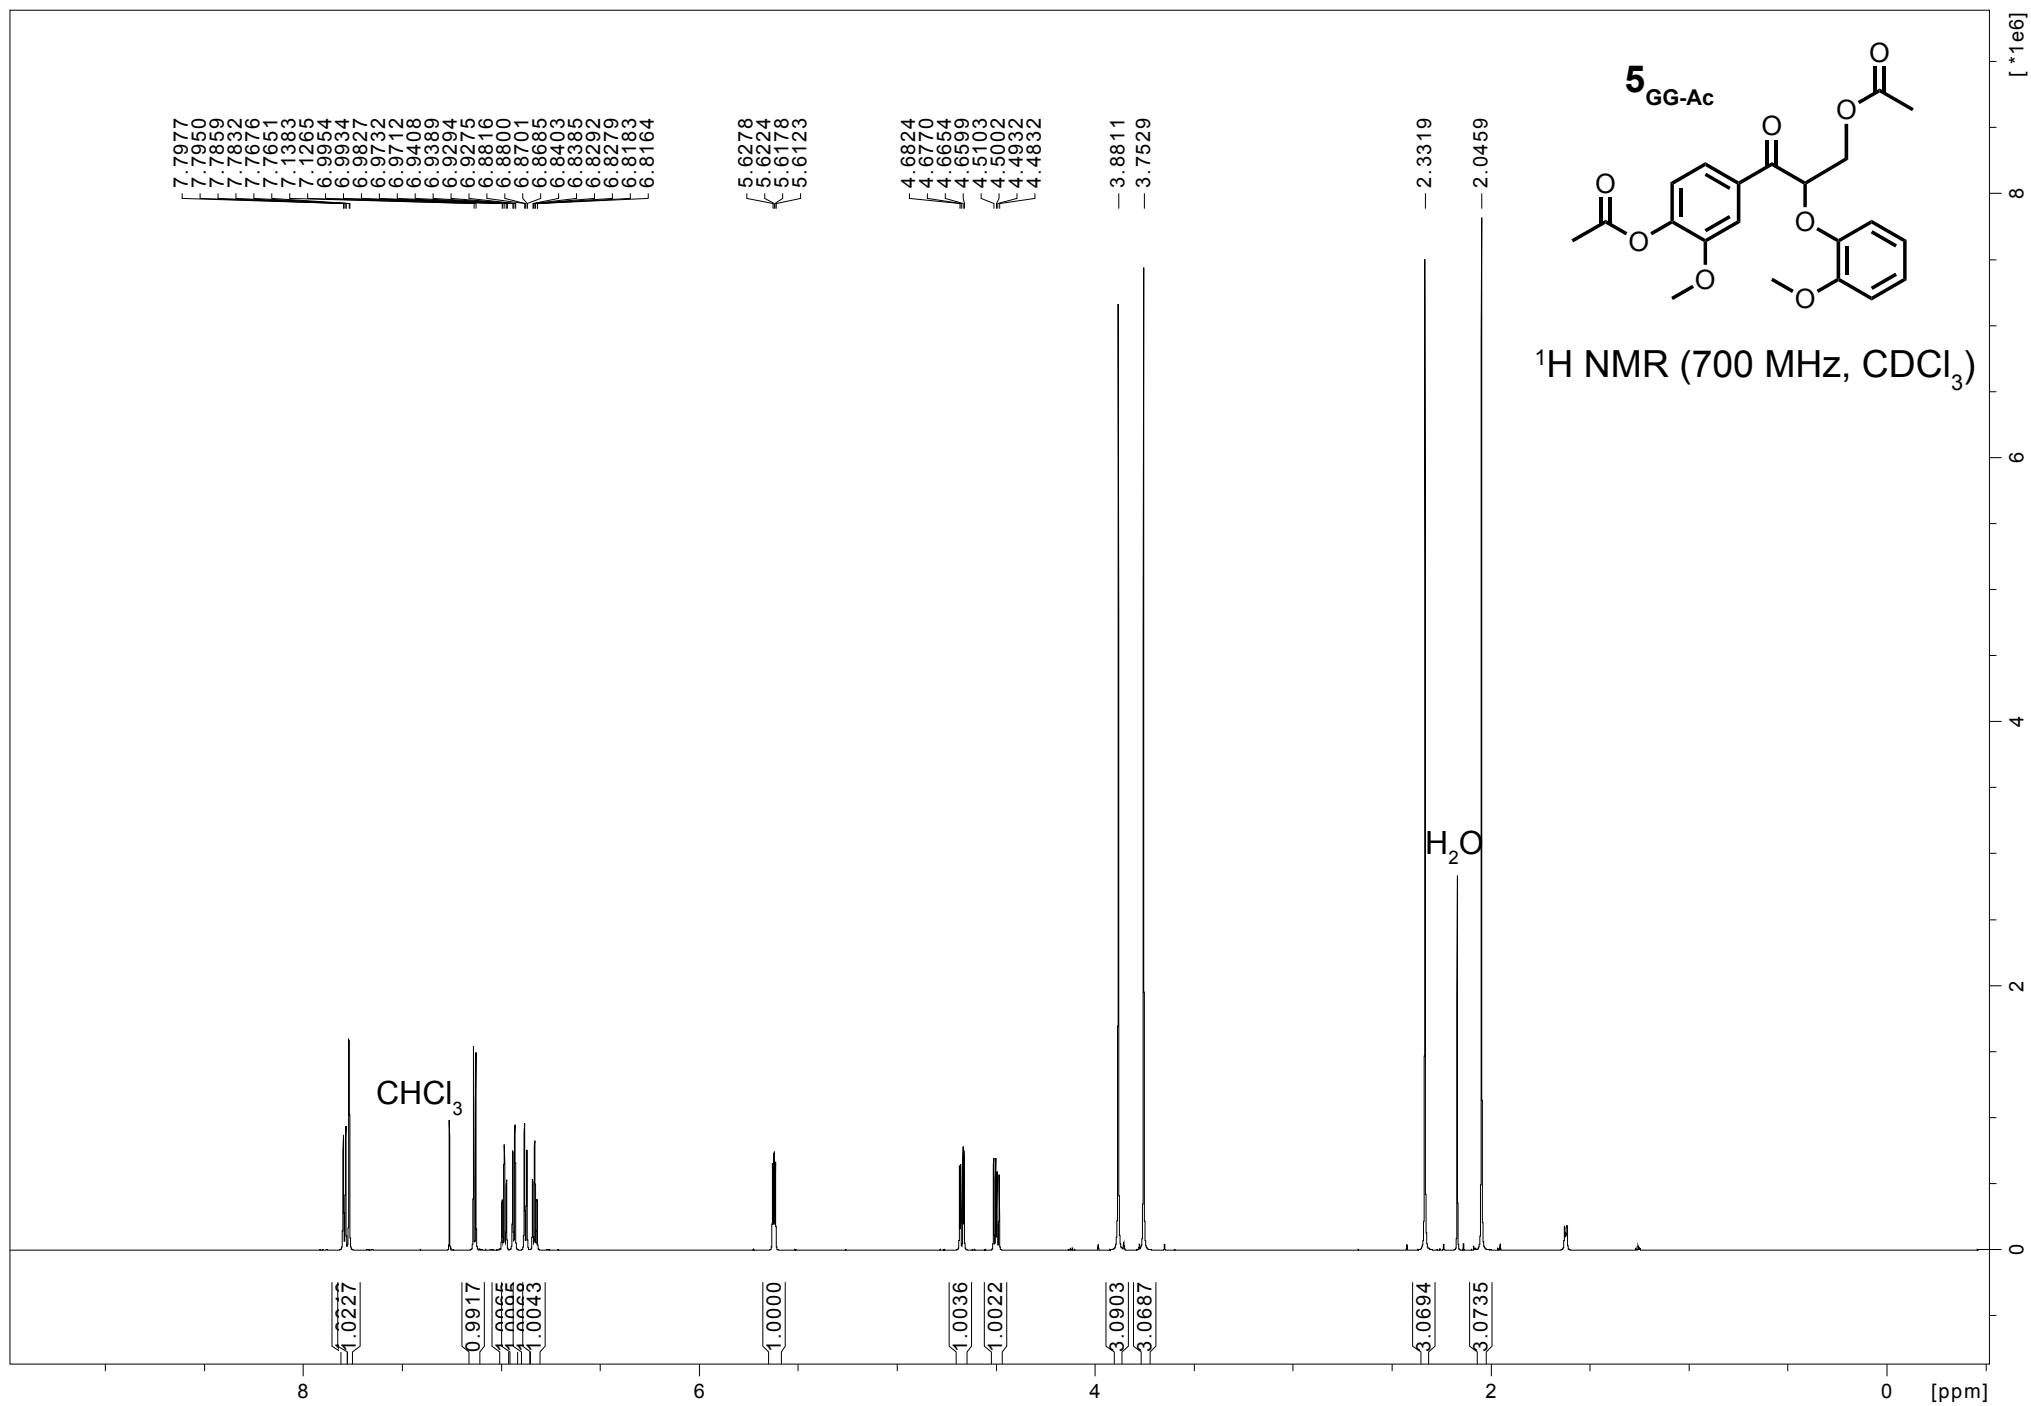

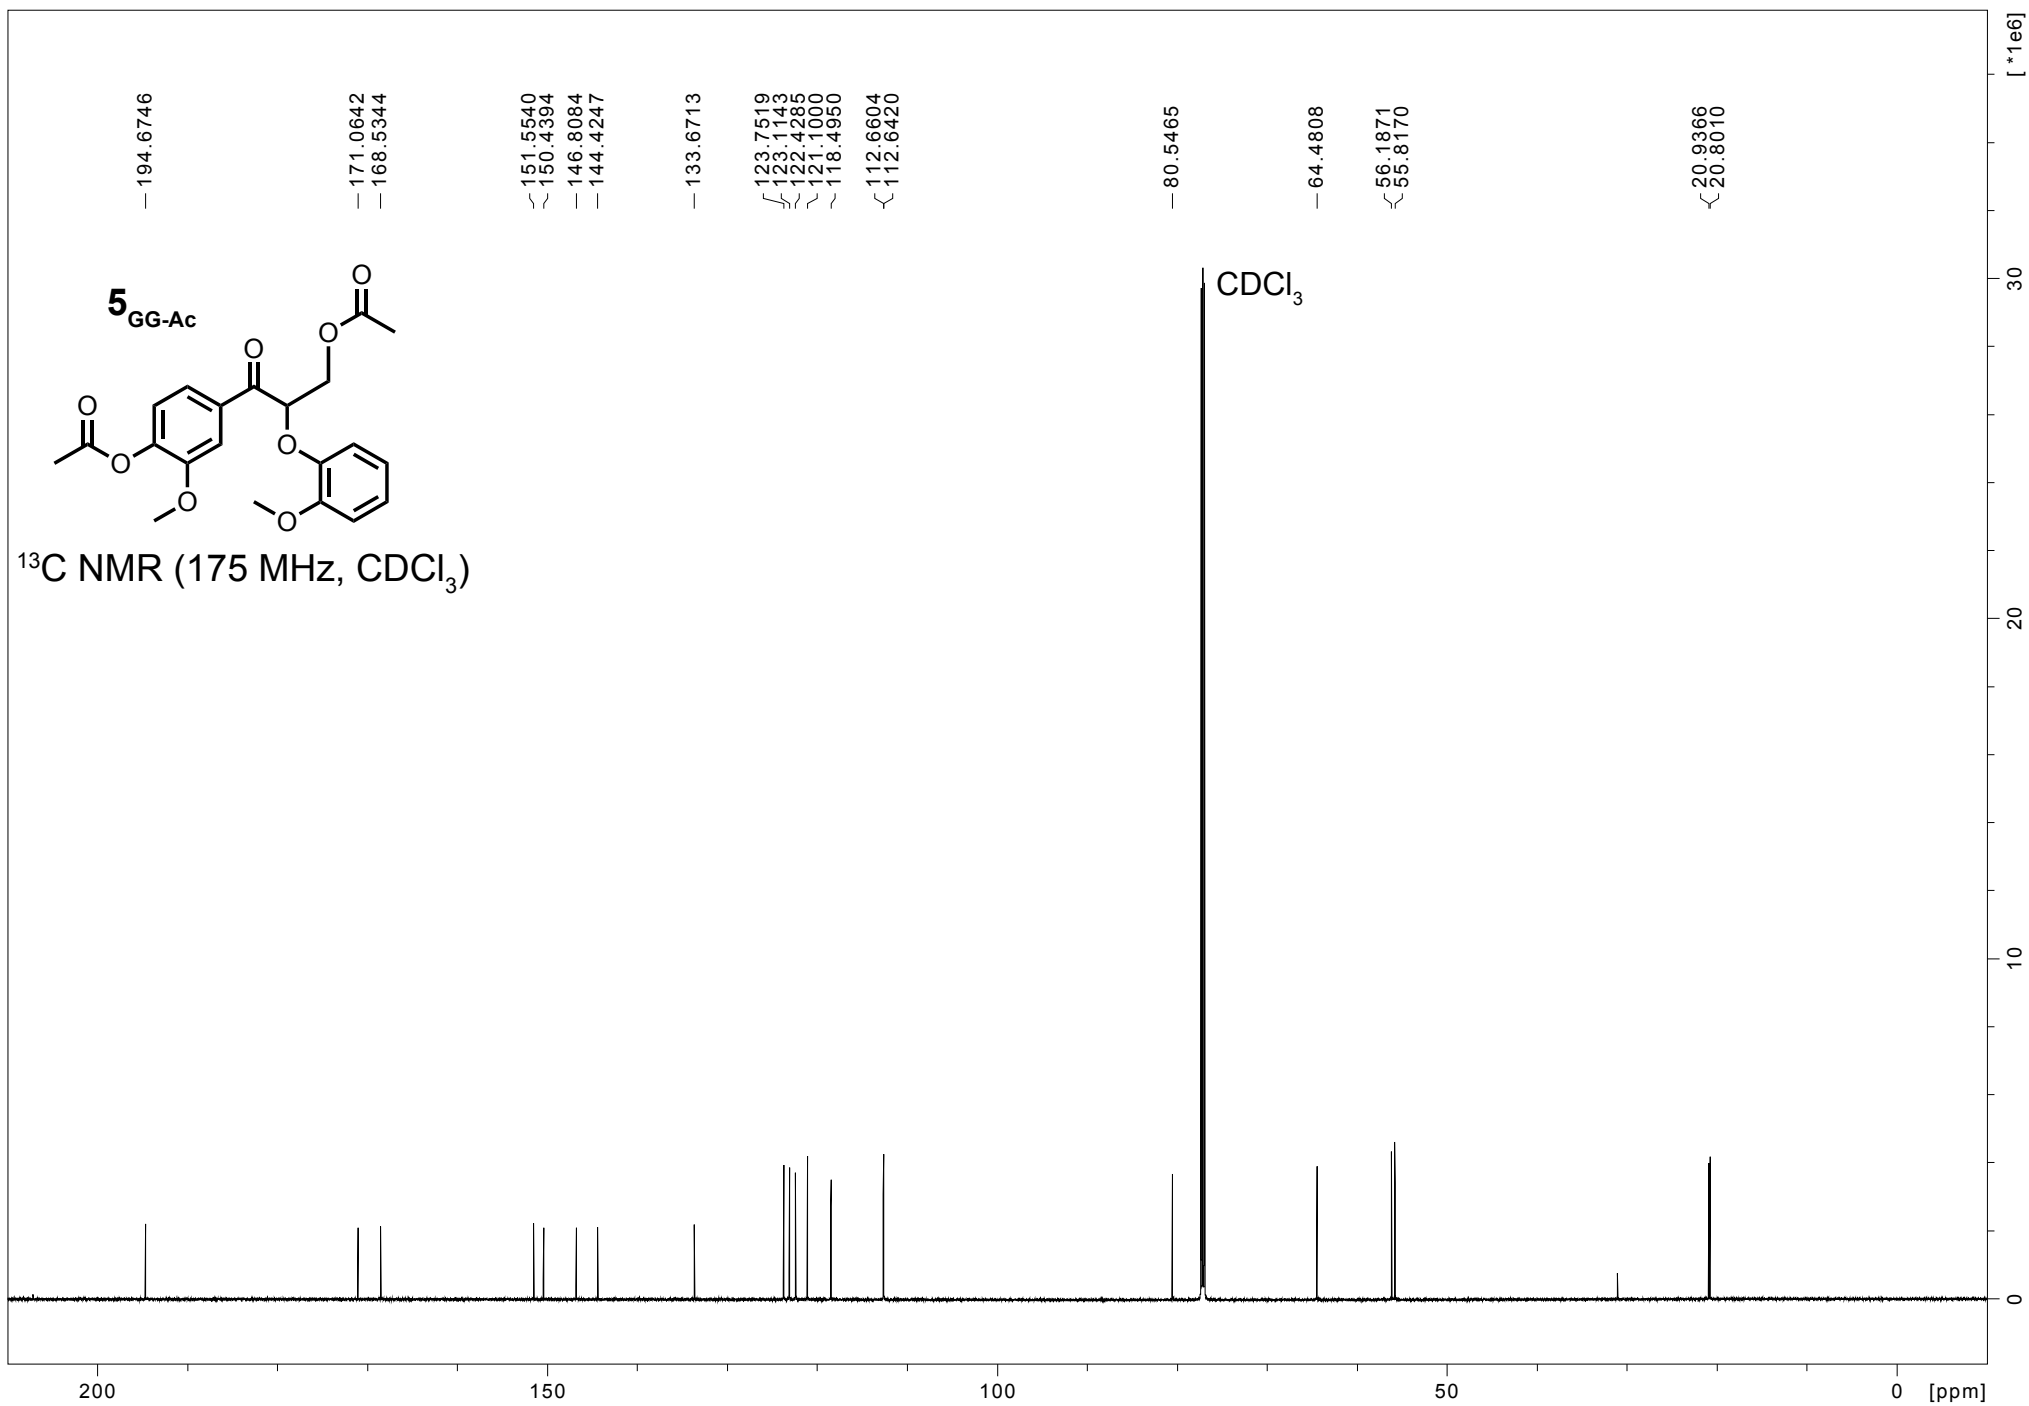

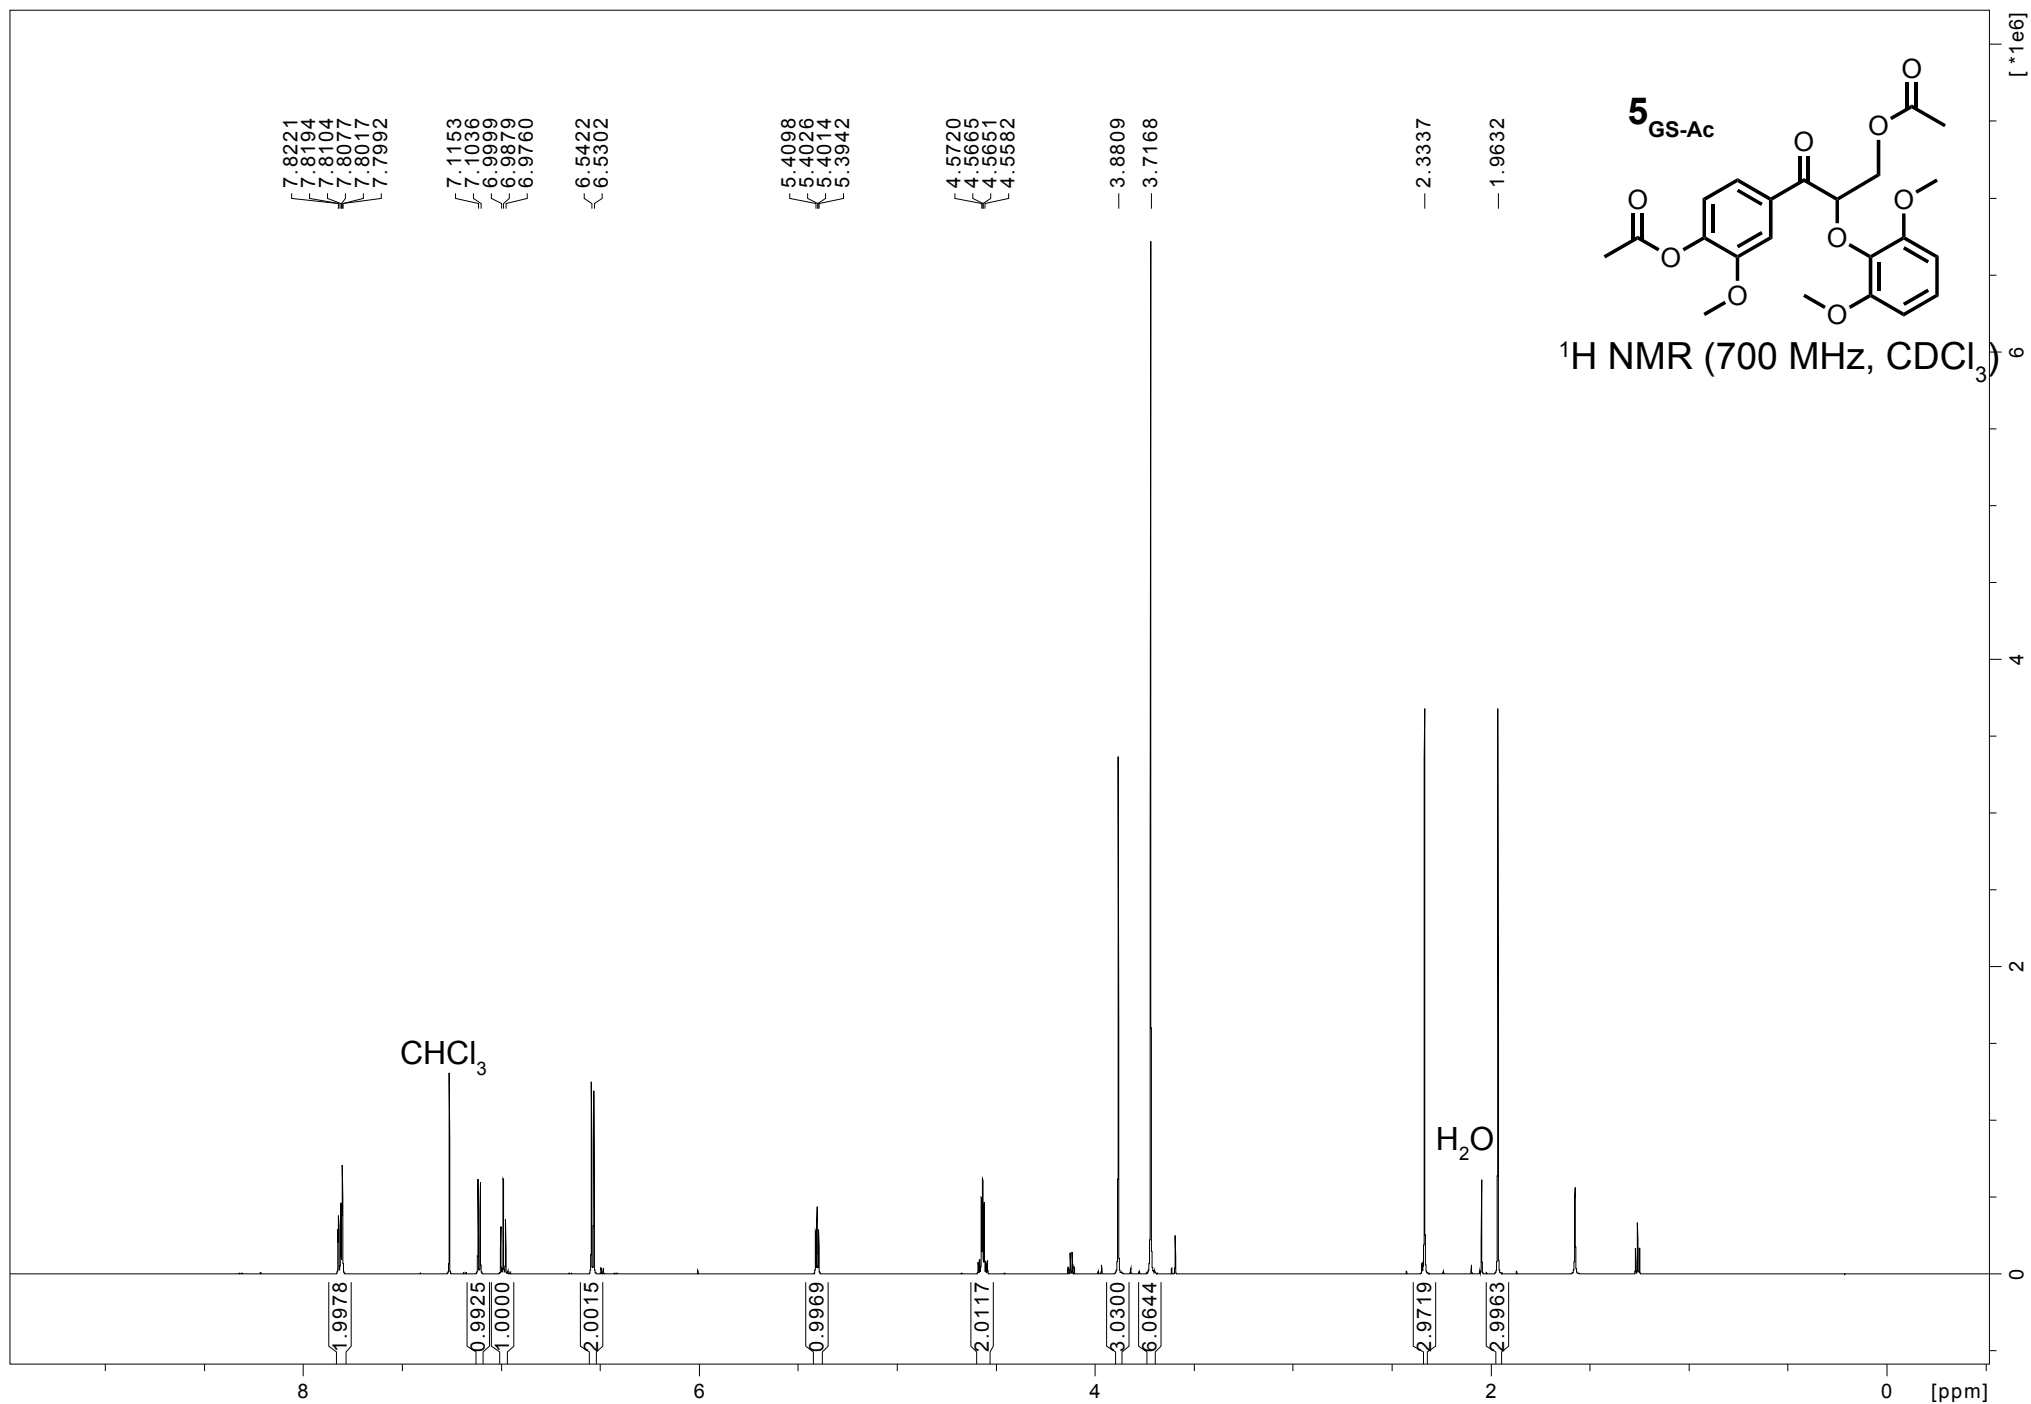

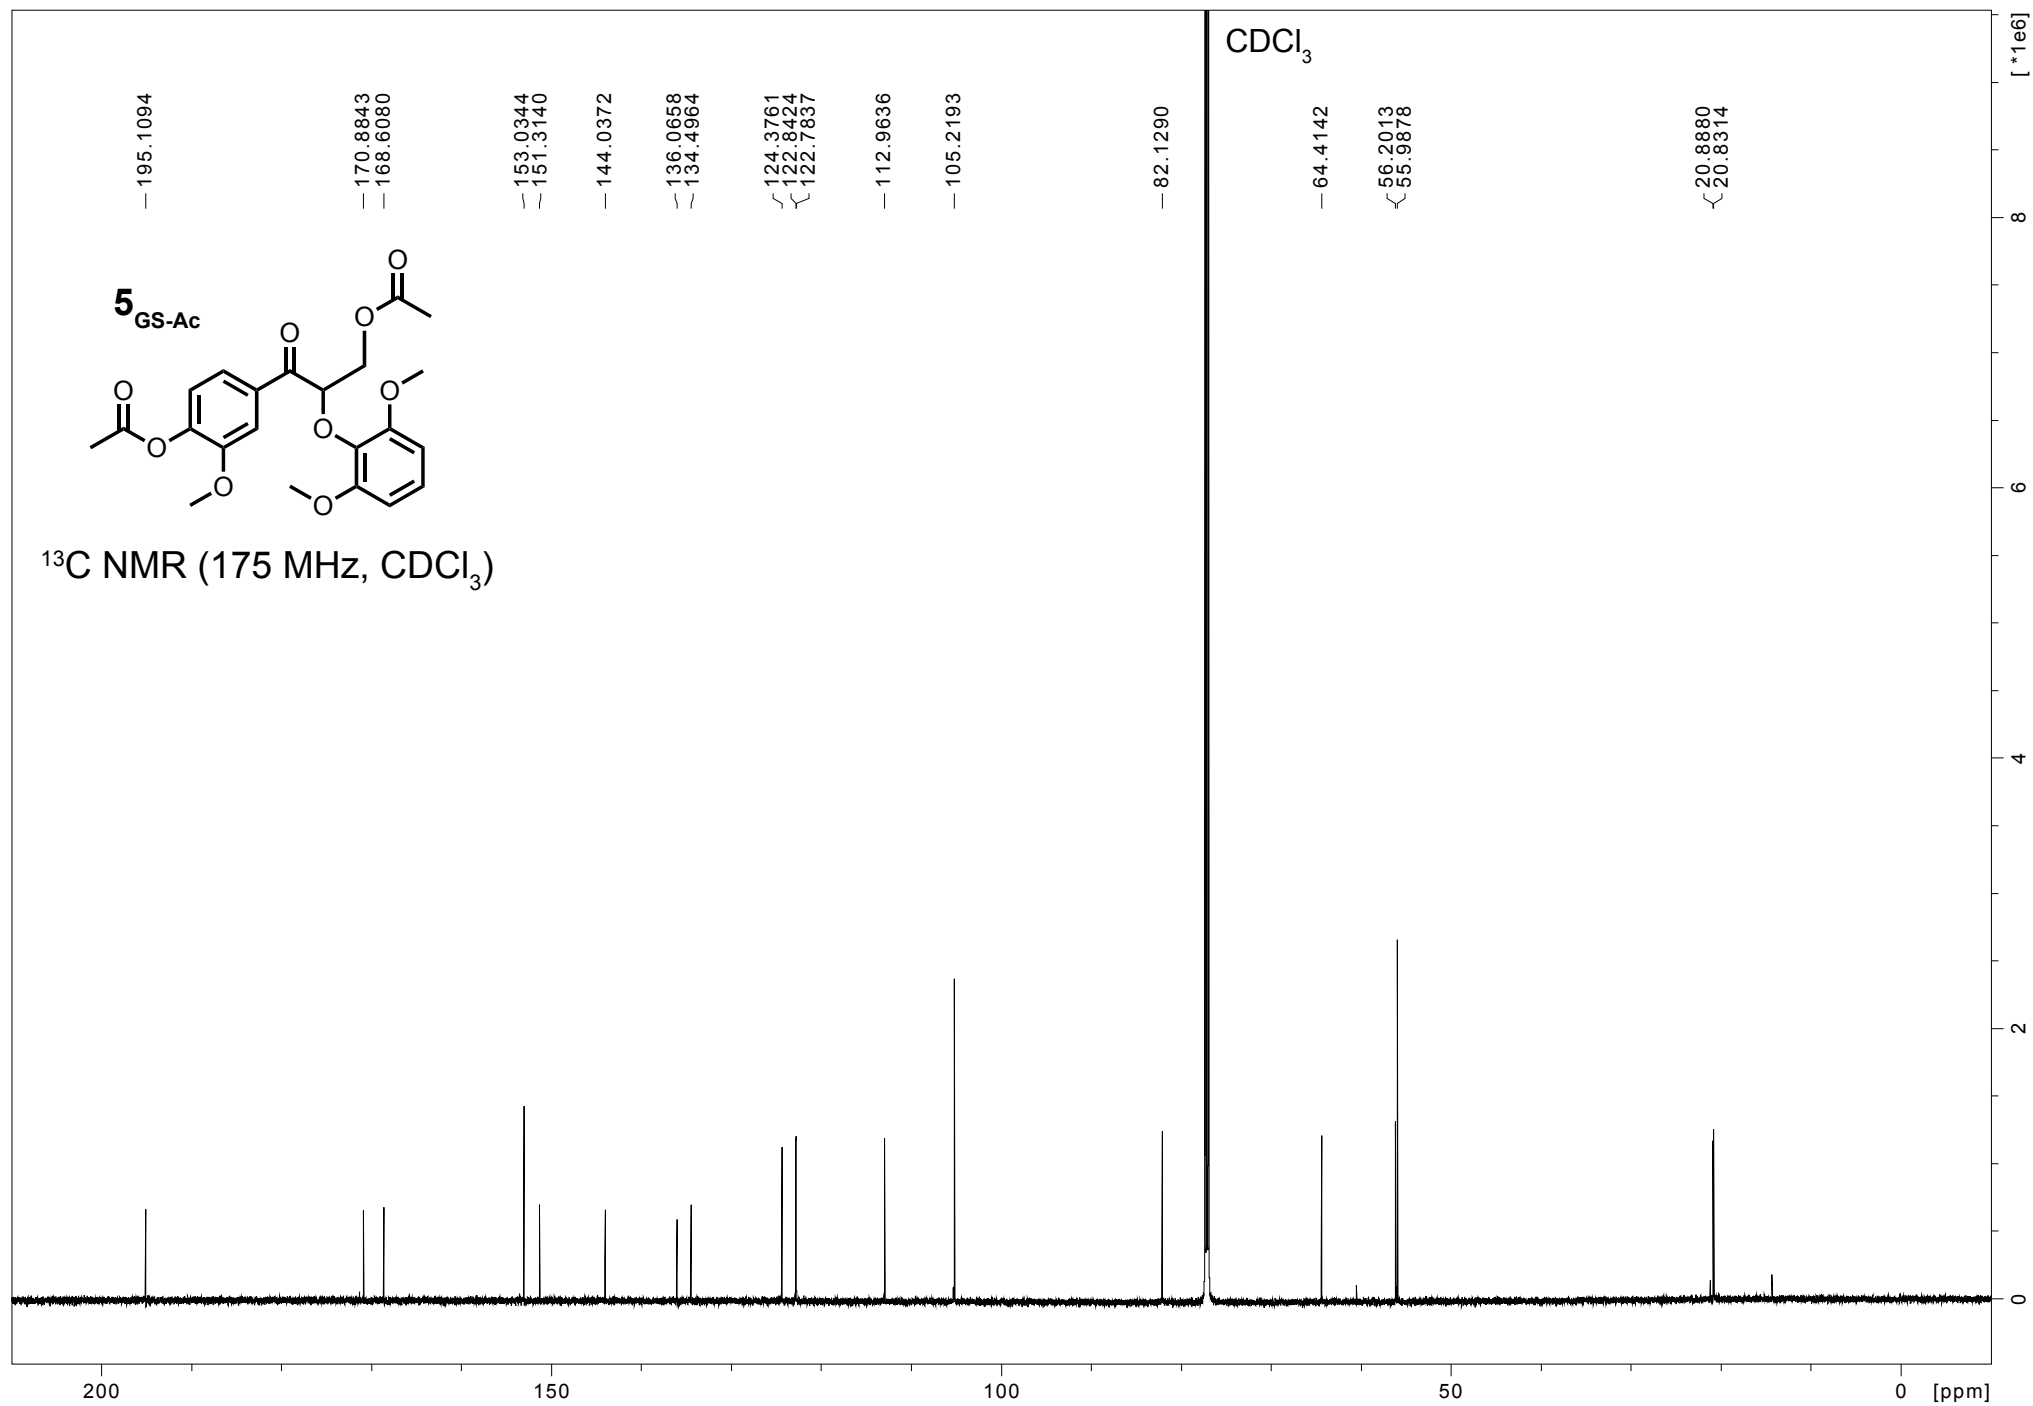

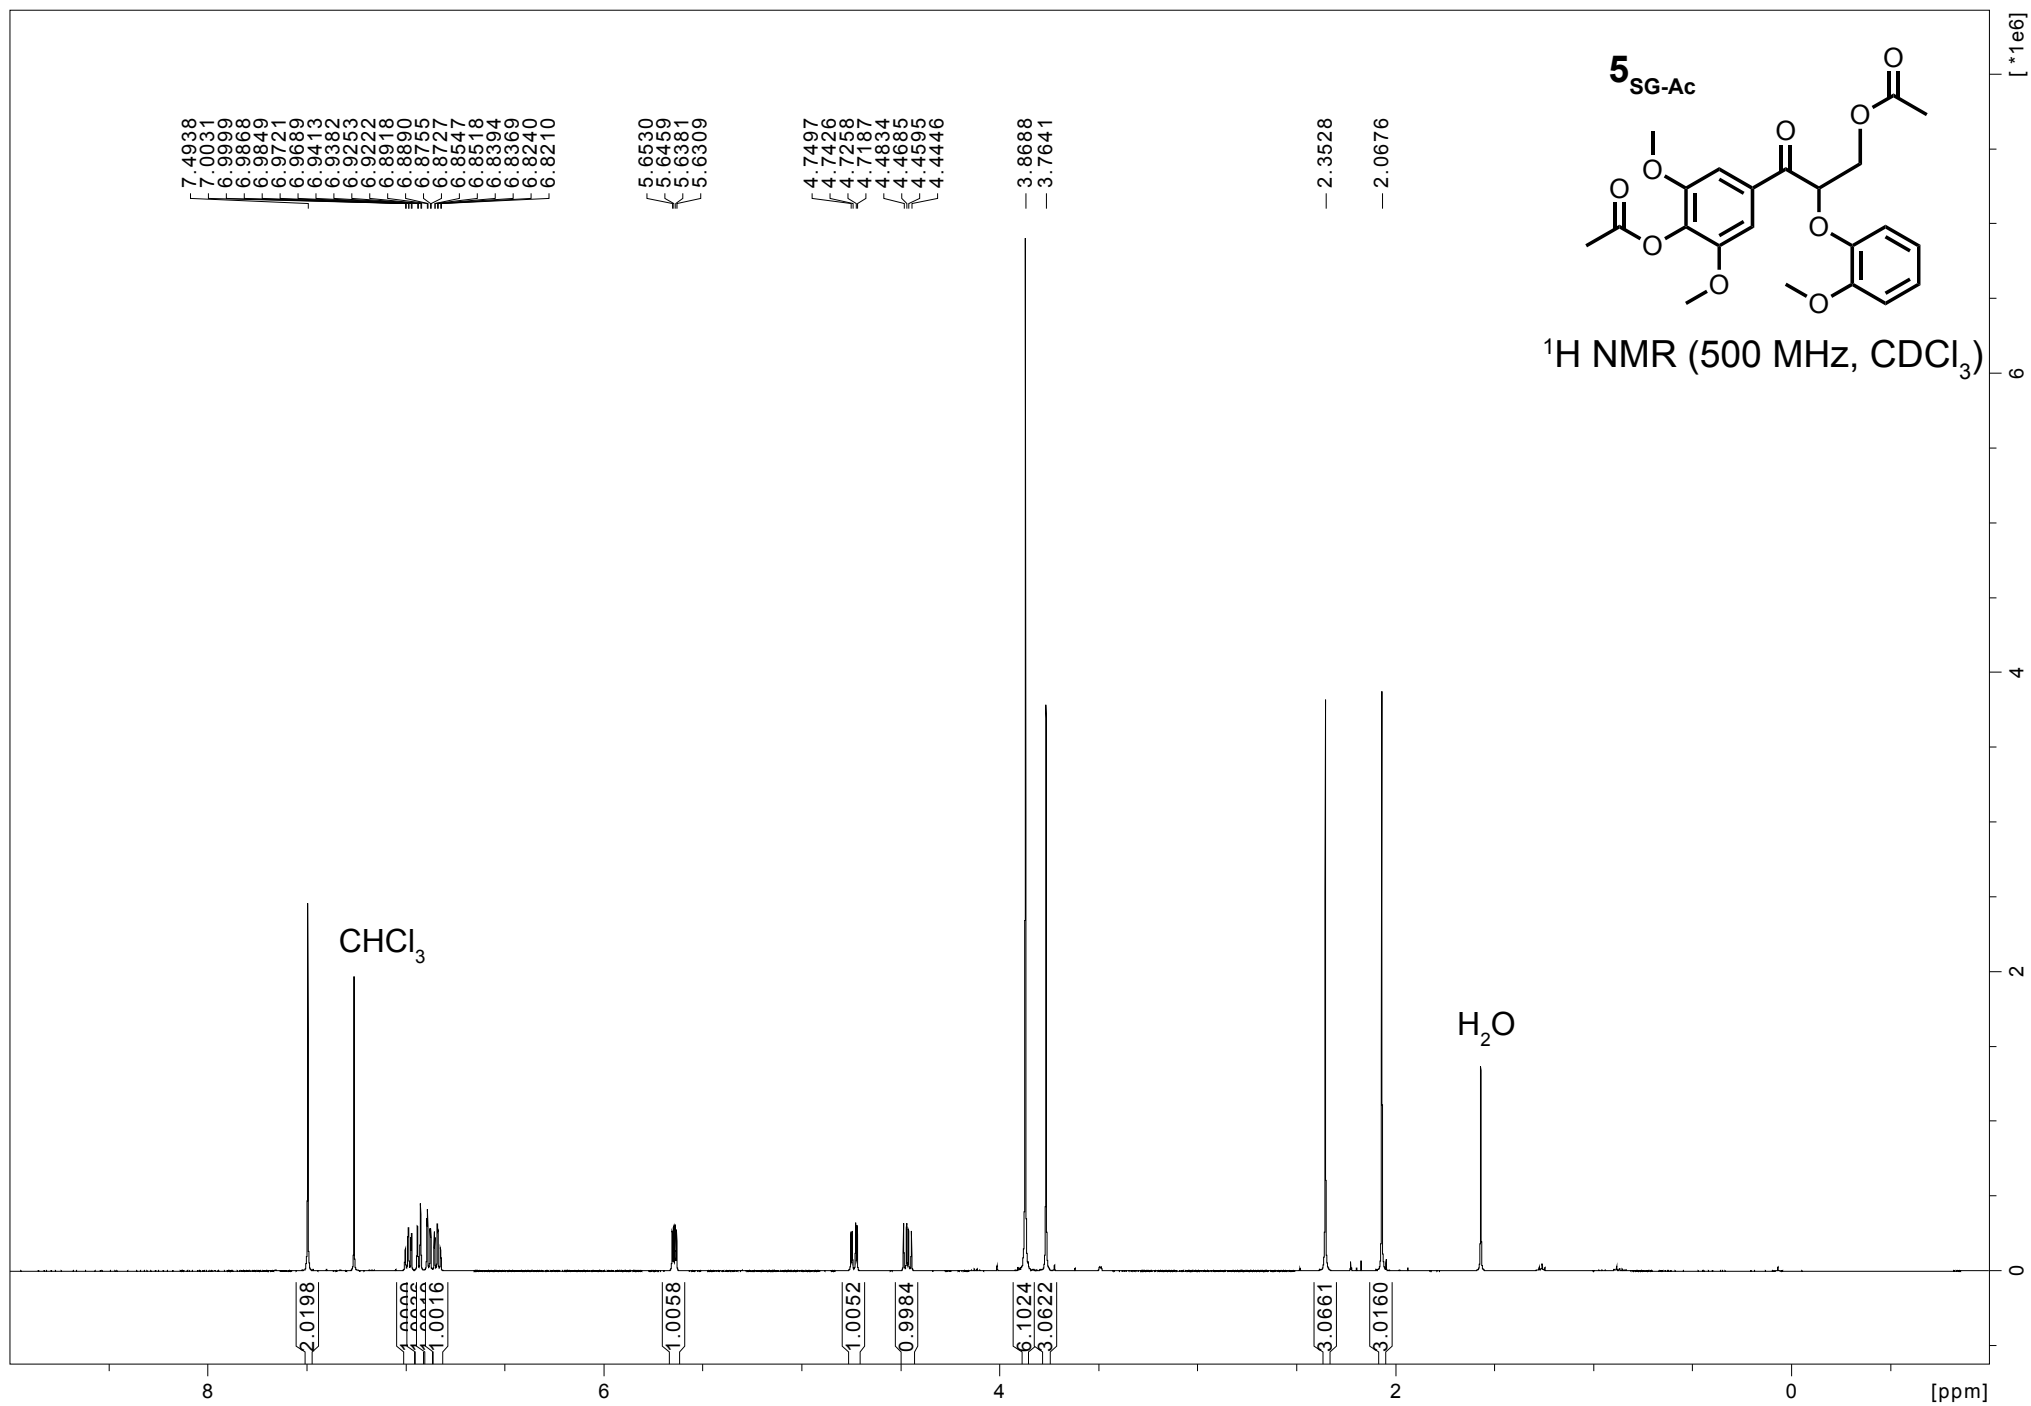



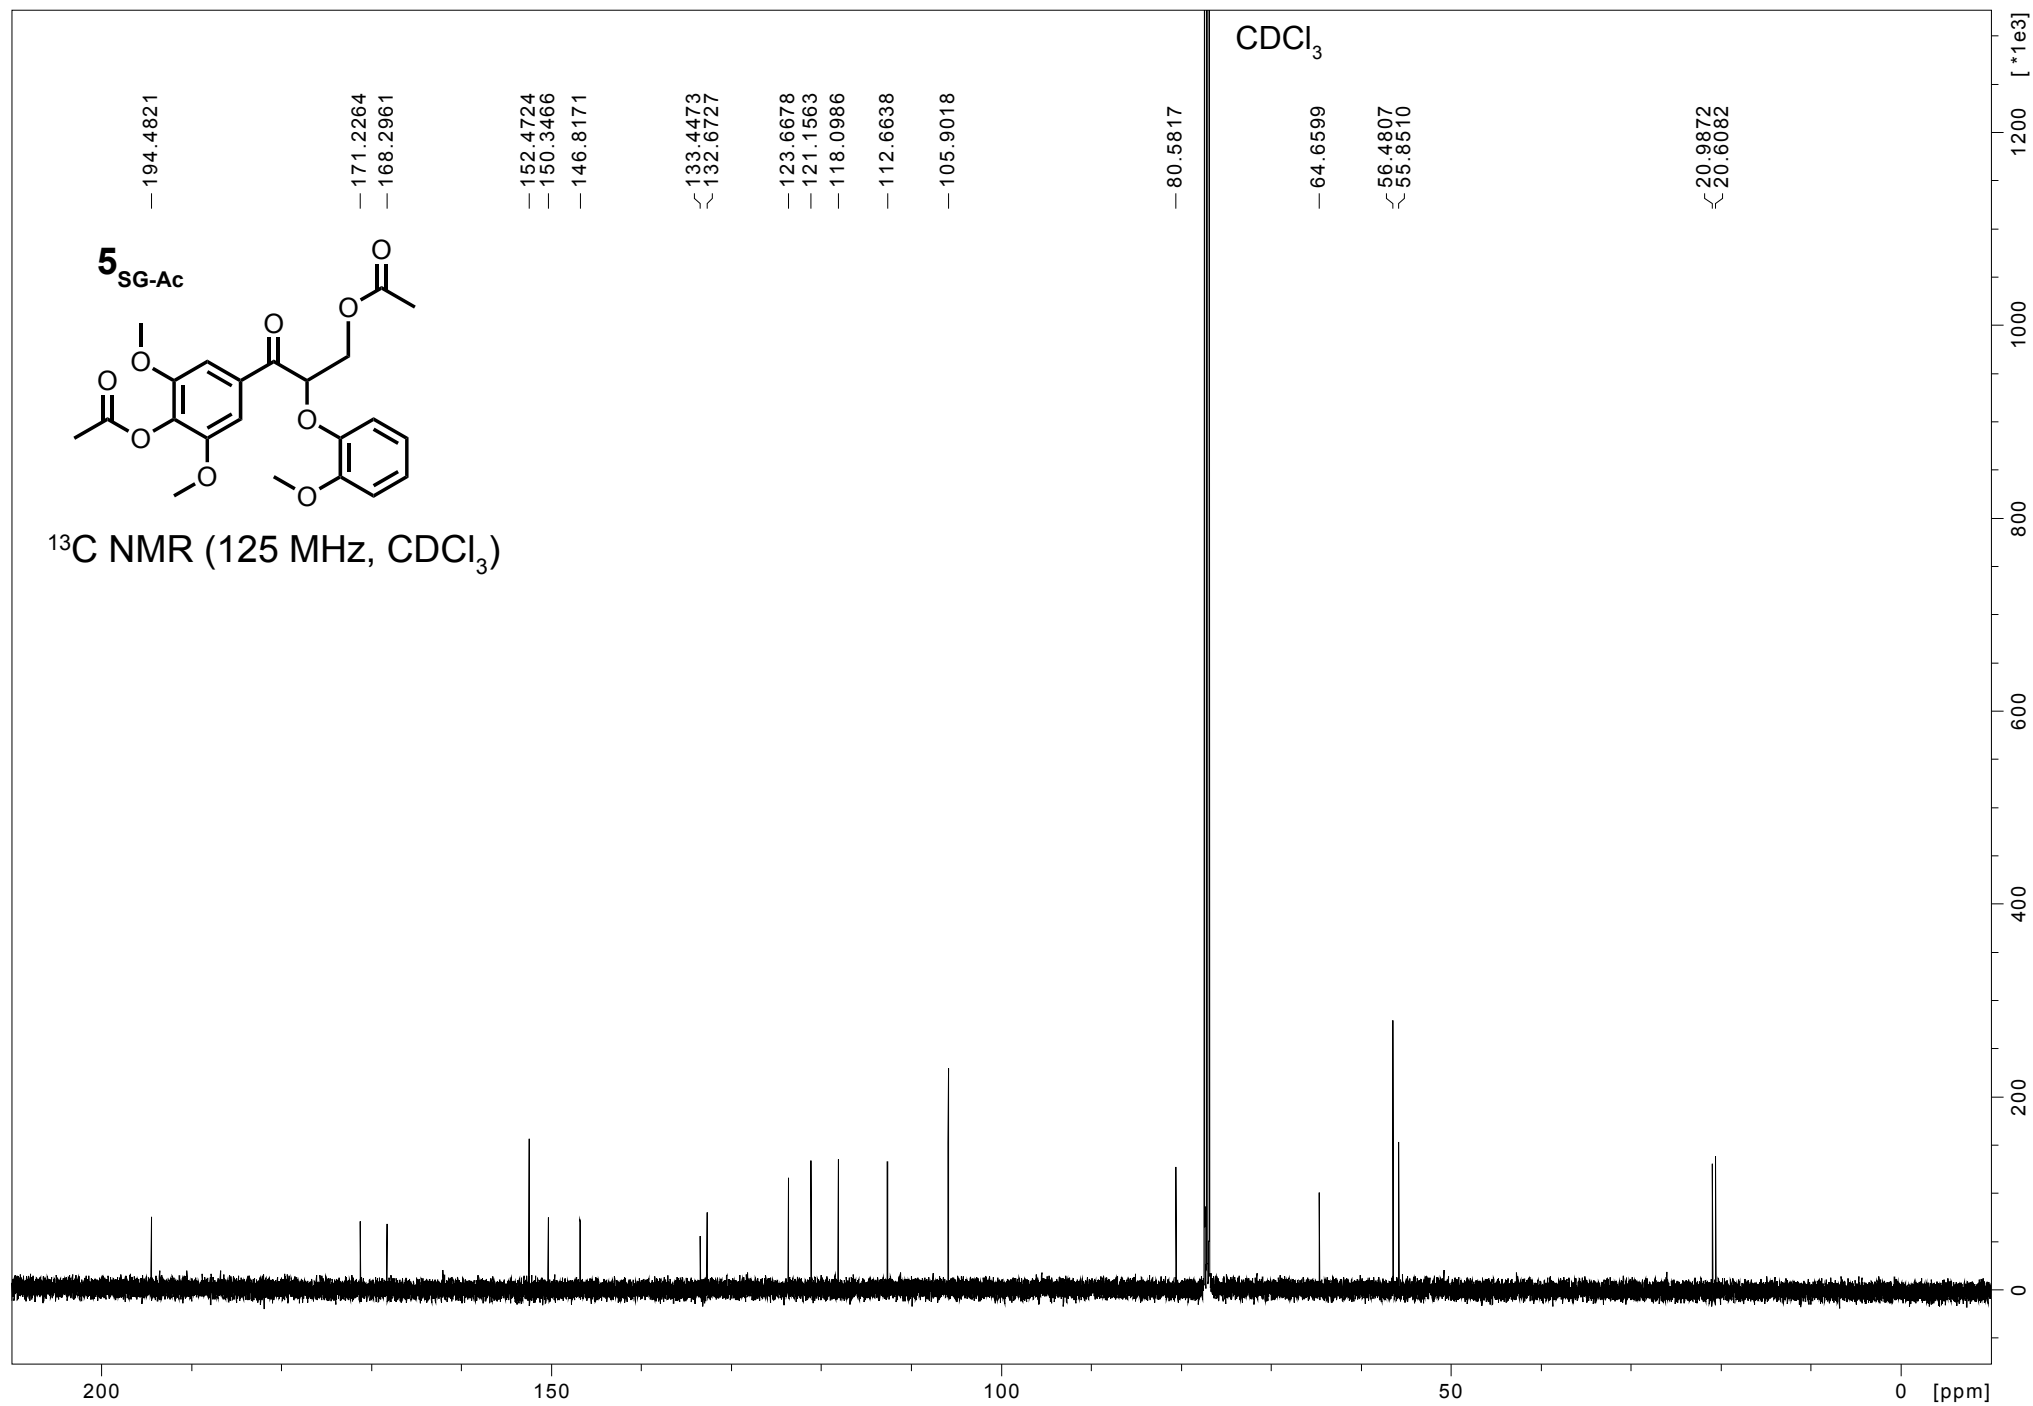

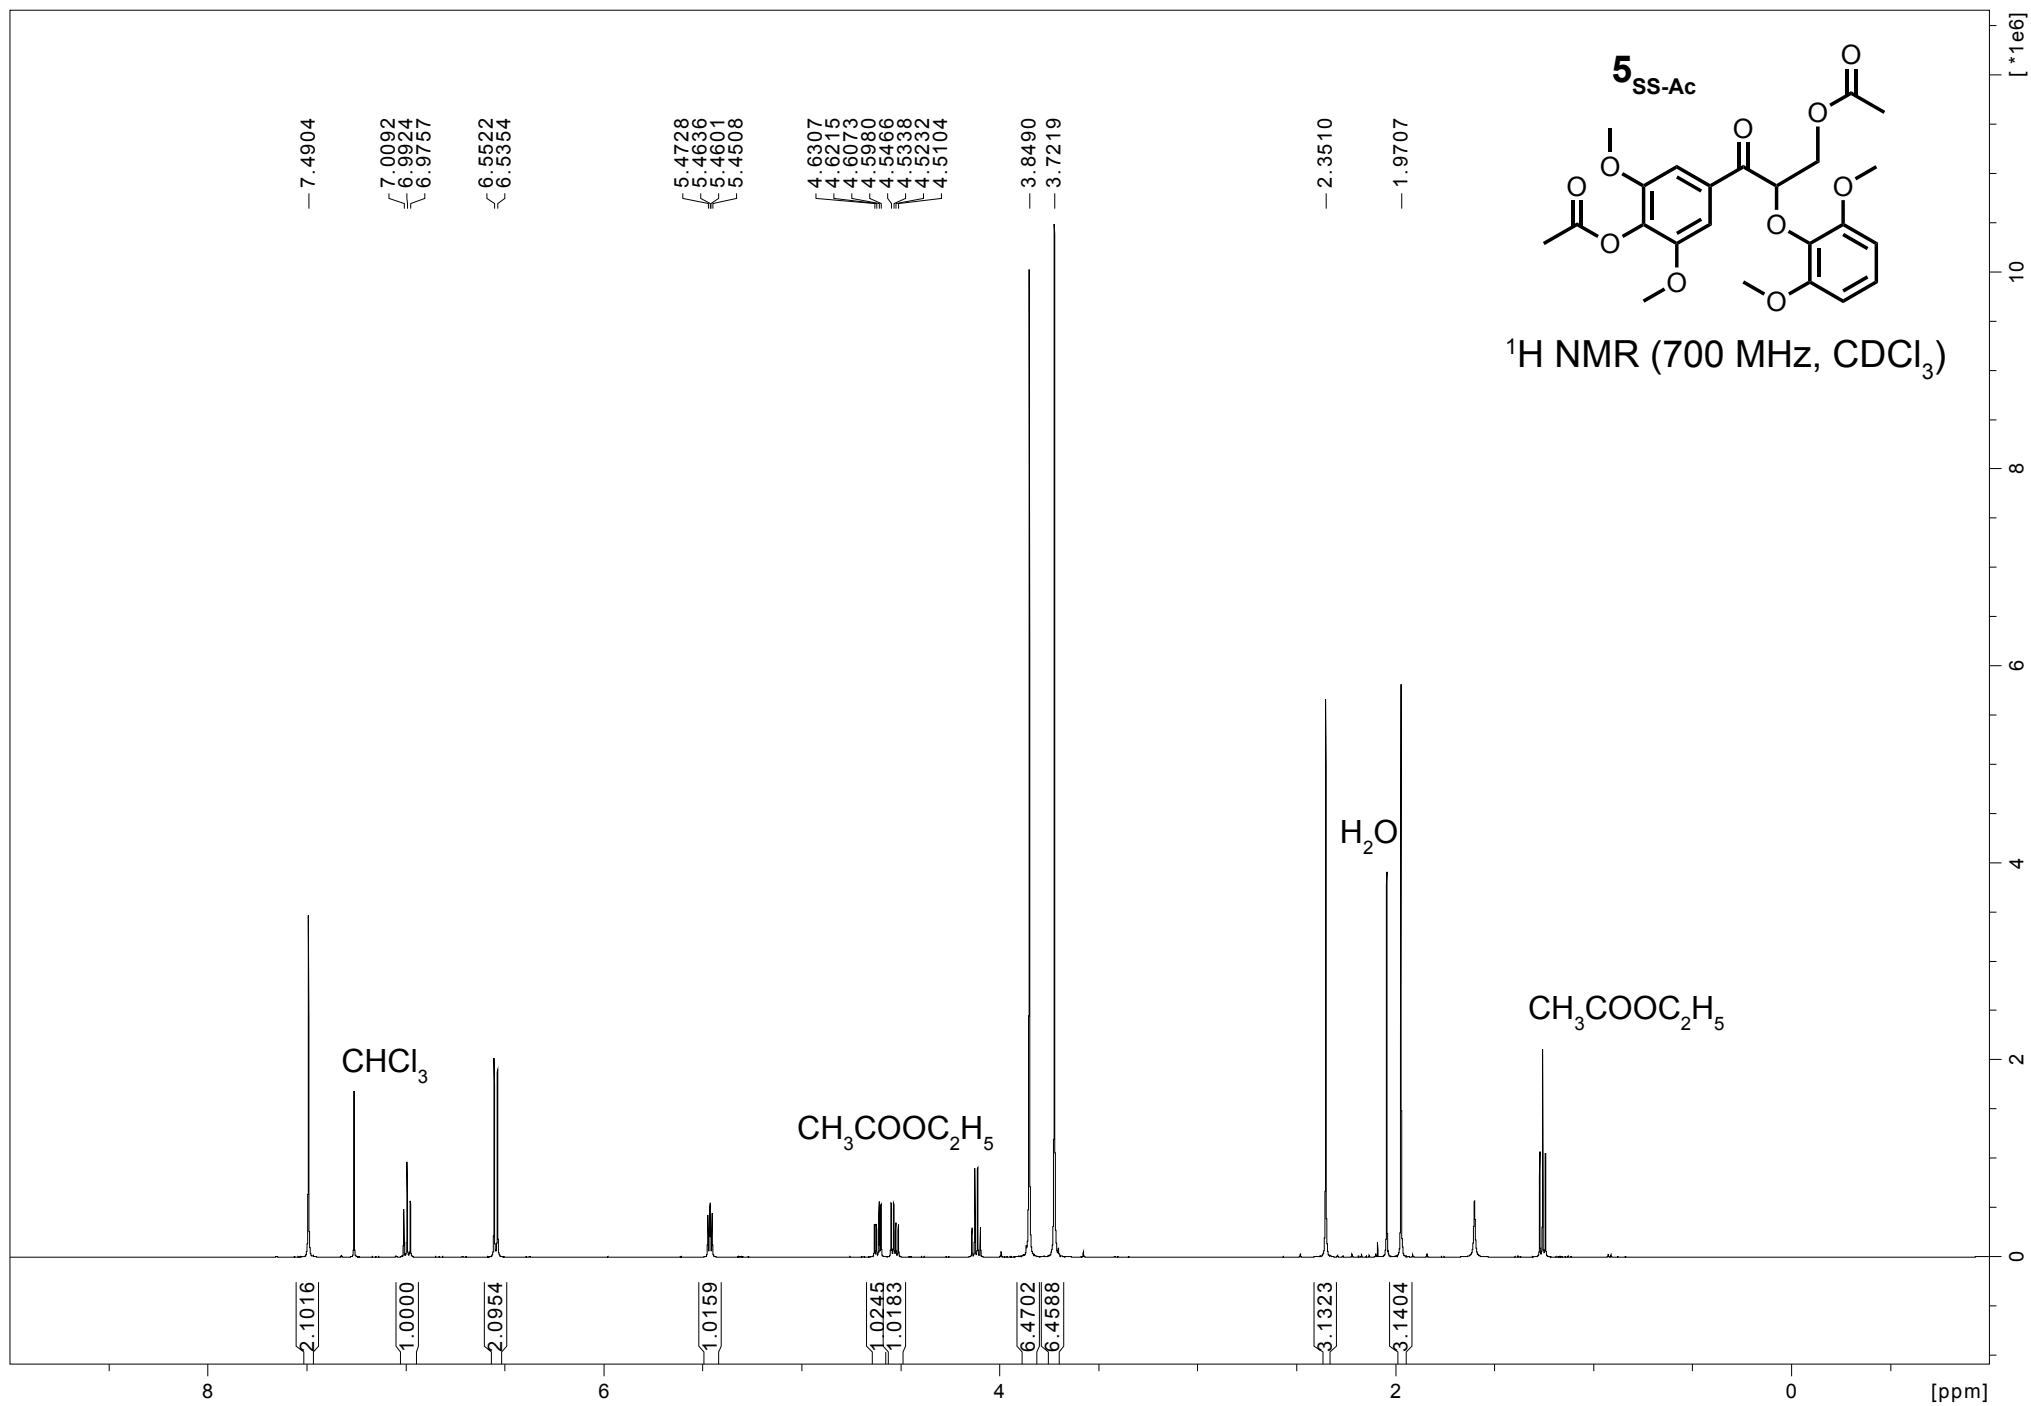

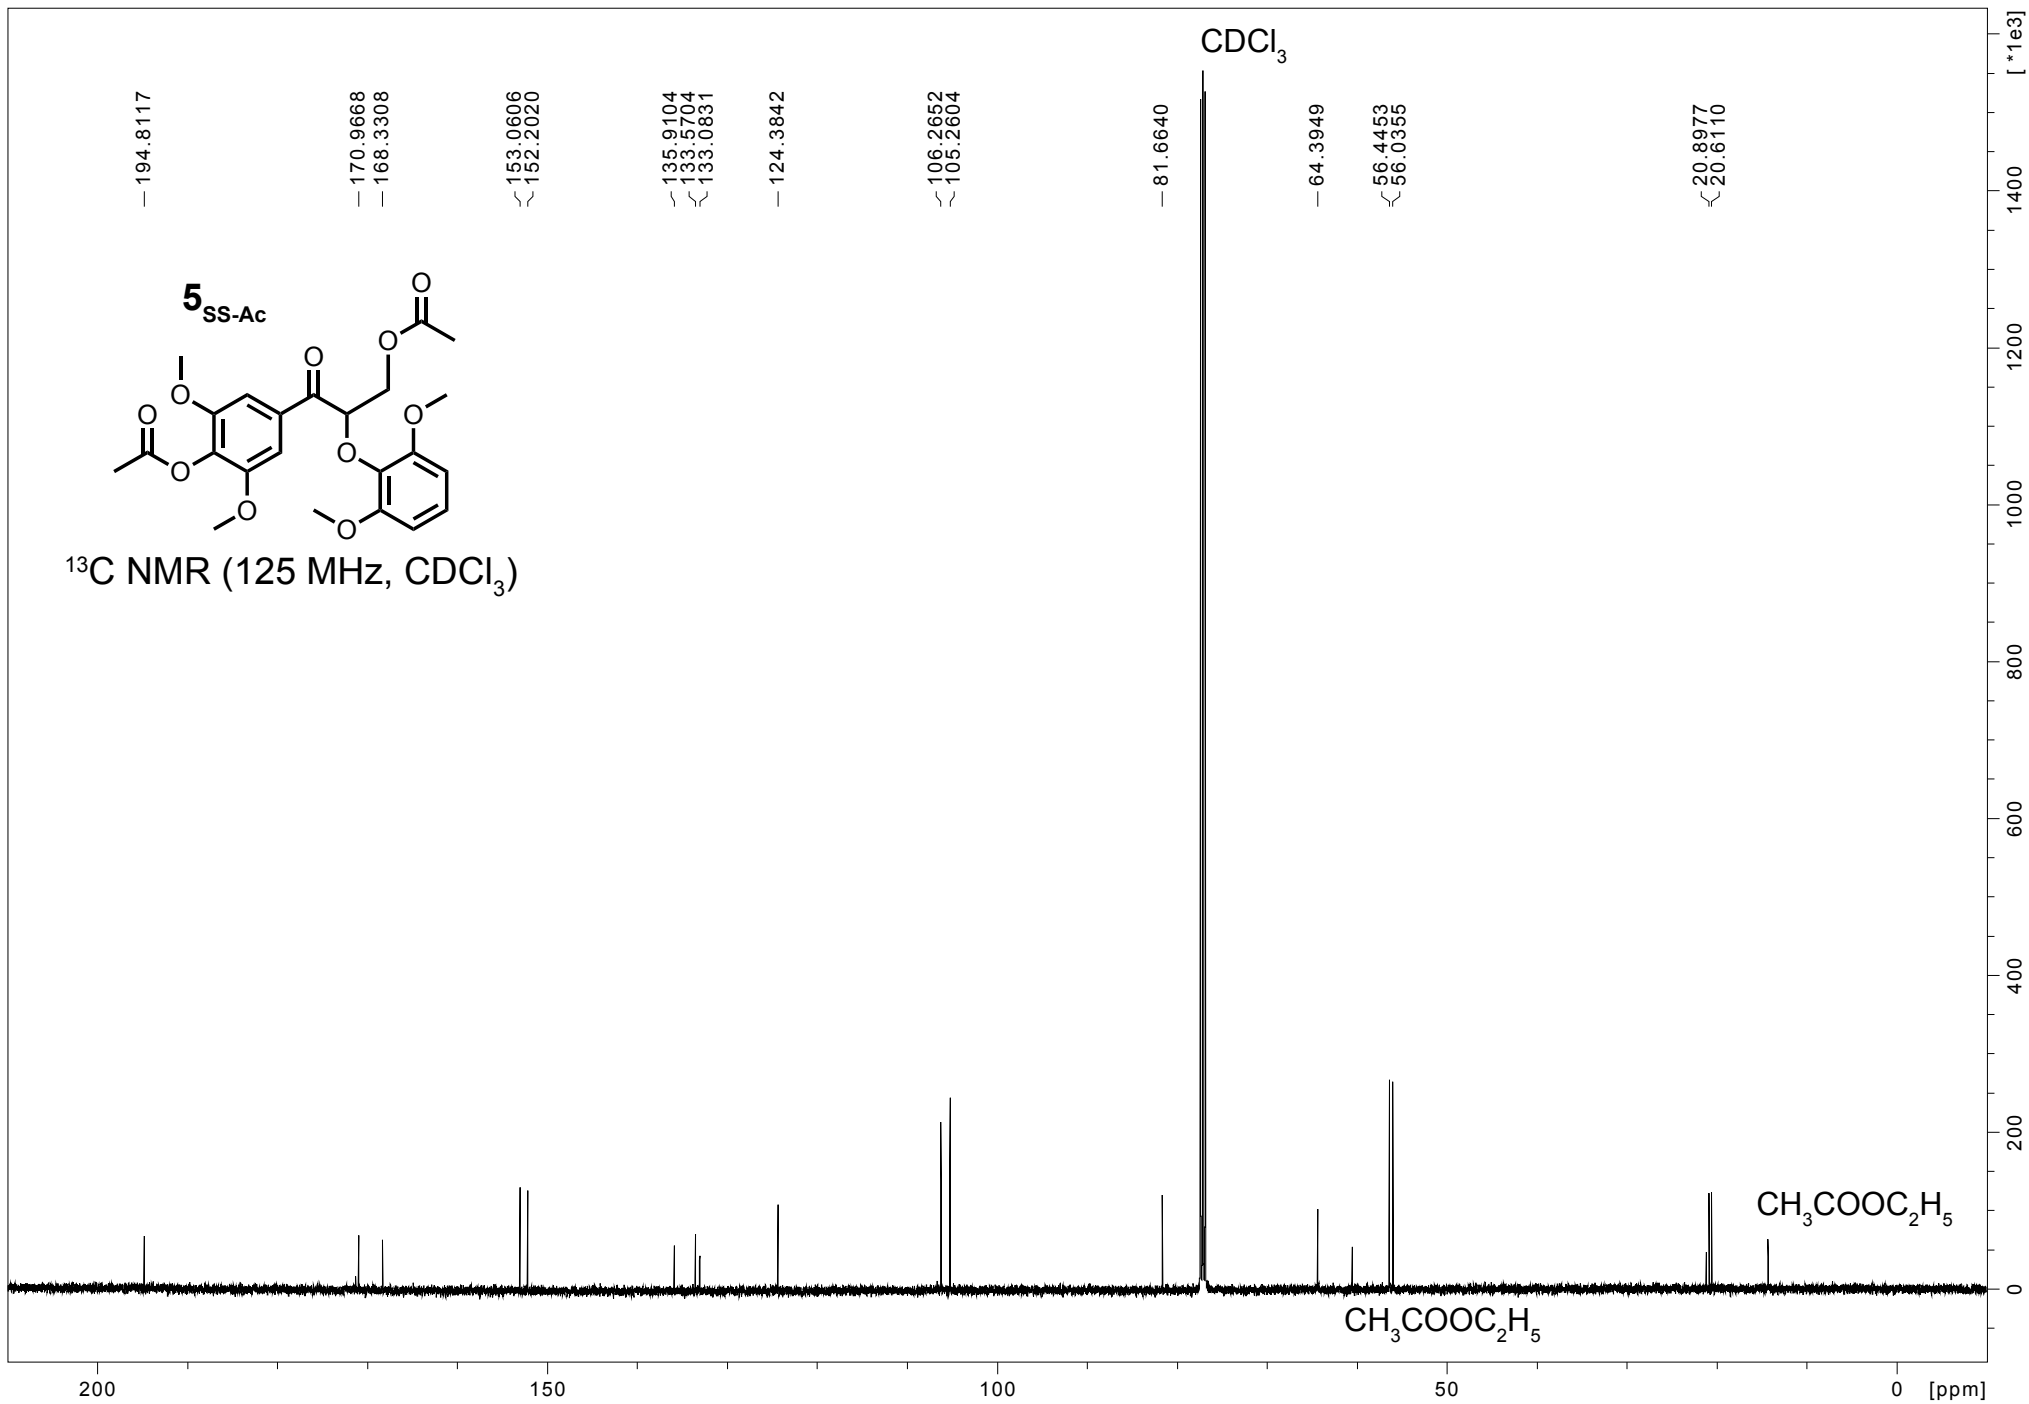

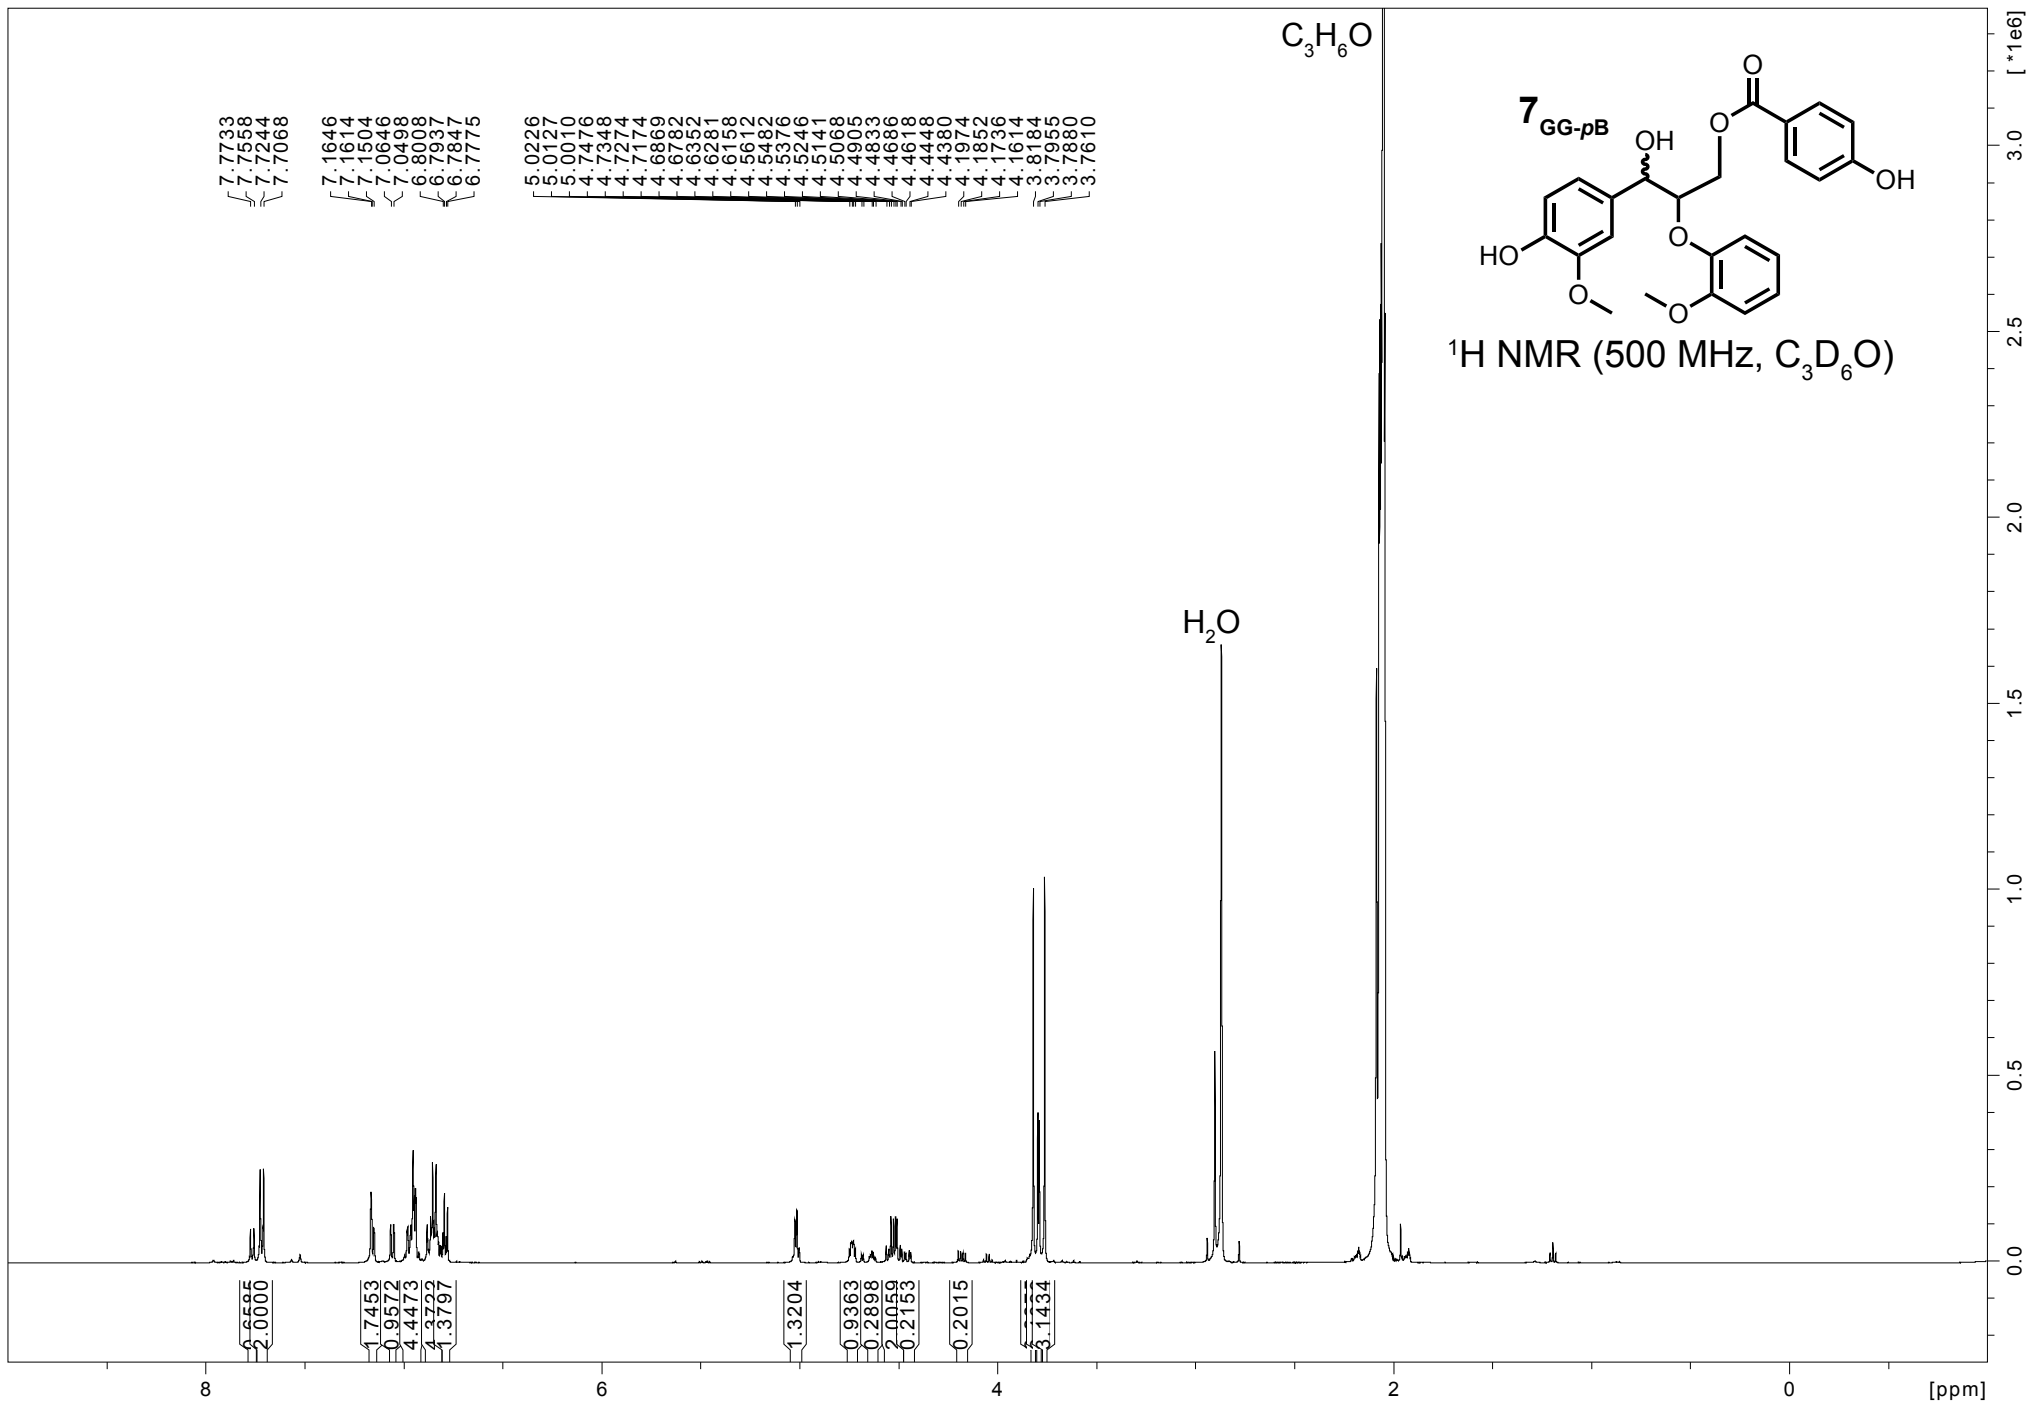

C<sub>3</sub>D<sub>6</sub>O

C<sub>3</sub>D<sub>6</sub>O

[\*1e6]

- 166.4357
- 166.2946
- 152.0656
- 151.8178
- 149.3438
- 148.8500
- 148.0592
- 148.0285
- 146.9333
- 146.6636
- 133.6800
- 132.5409
- 132.5222
- 123.5394
- 122.3211
- 122.1924
- 121.7648
- 121.6923
- 120.5555
- 120.3086
- 119.7834
- 119.4589
- 115.8027
- 115.7966
- 115.2734
- 115.1896
- 113.5949
- 113.5337
- 111.4093
- 111.1481

- 84.5479
- 83.6377
- 73.9904
- 73.2391
- 64.5071
- 64.2952
- 56.1795
- 56.1577
- 56.1250

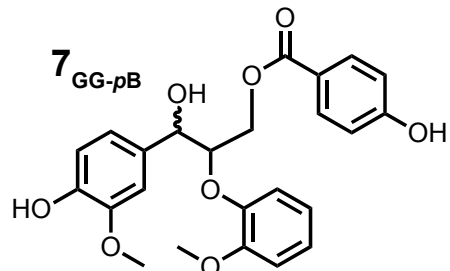

<sup>13</sup>C NMR (125 MHz, C<sub>3</sub>D<sub>6</sub>O)

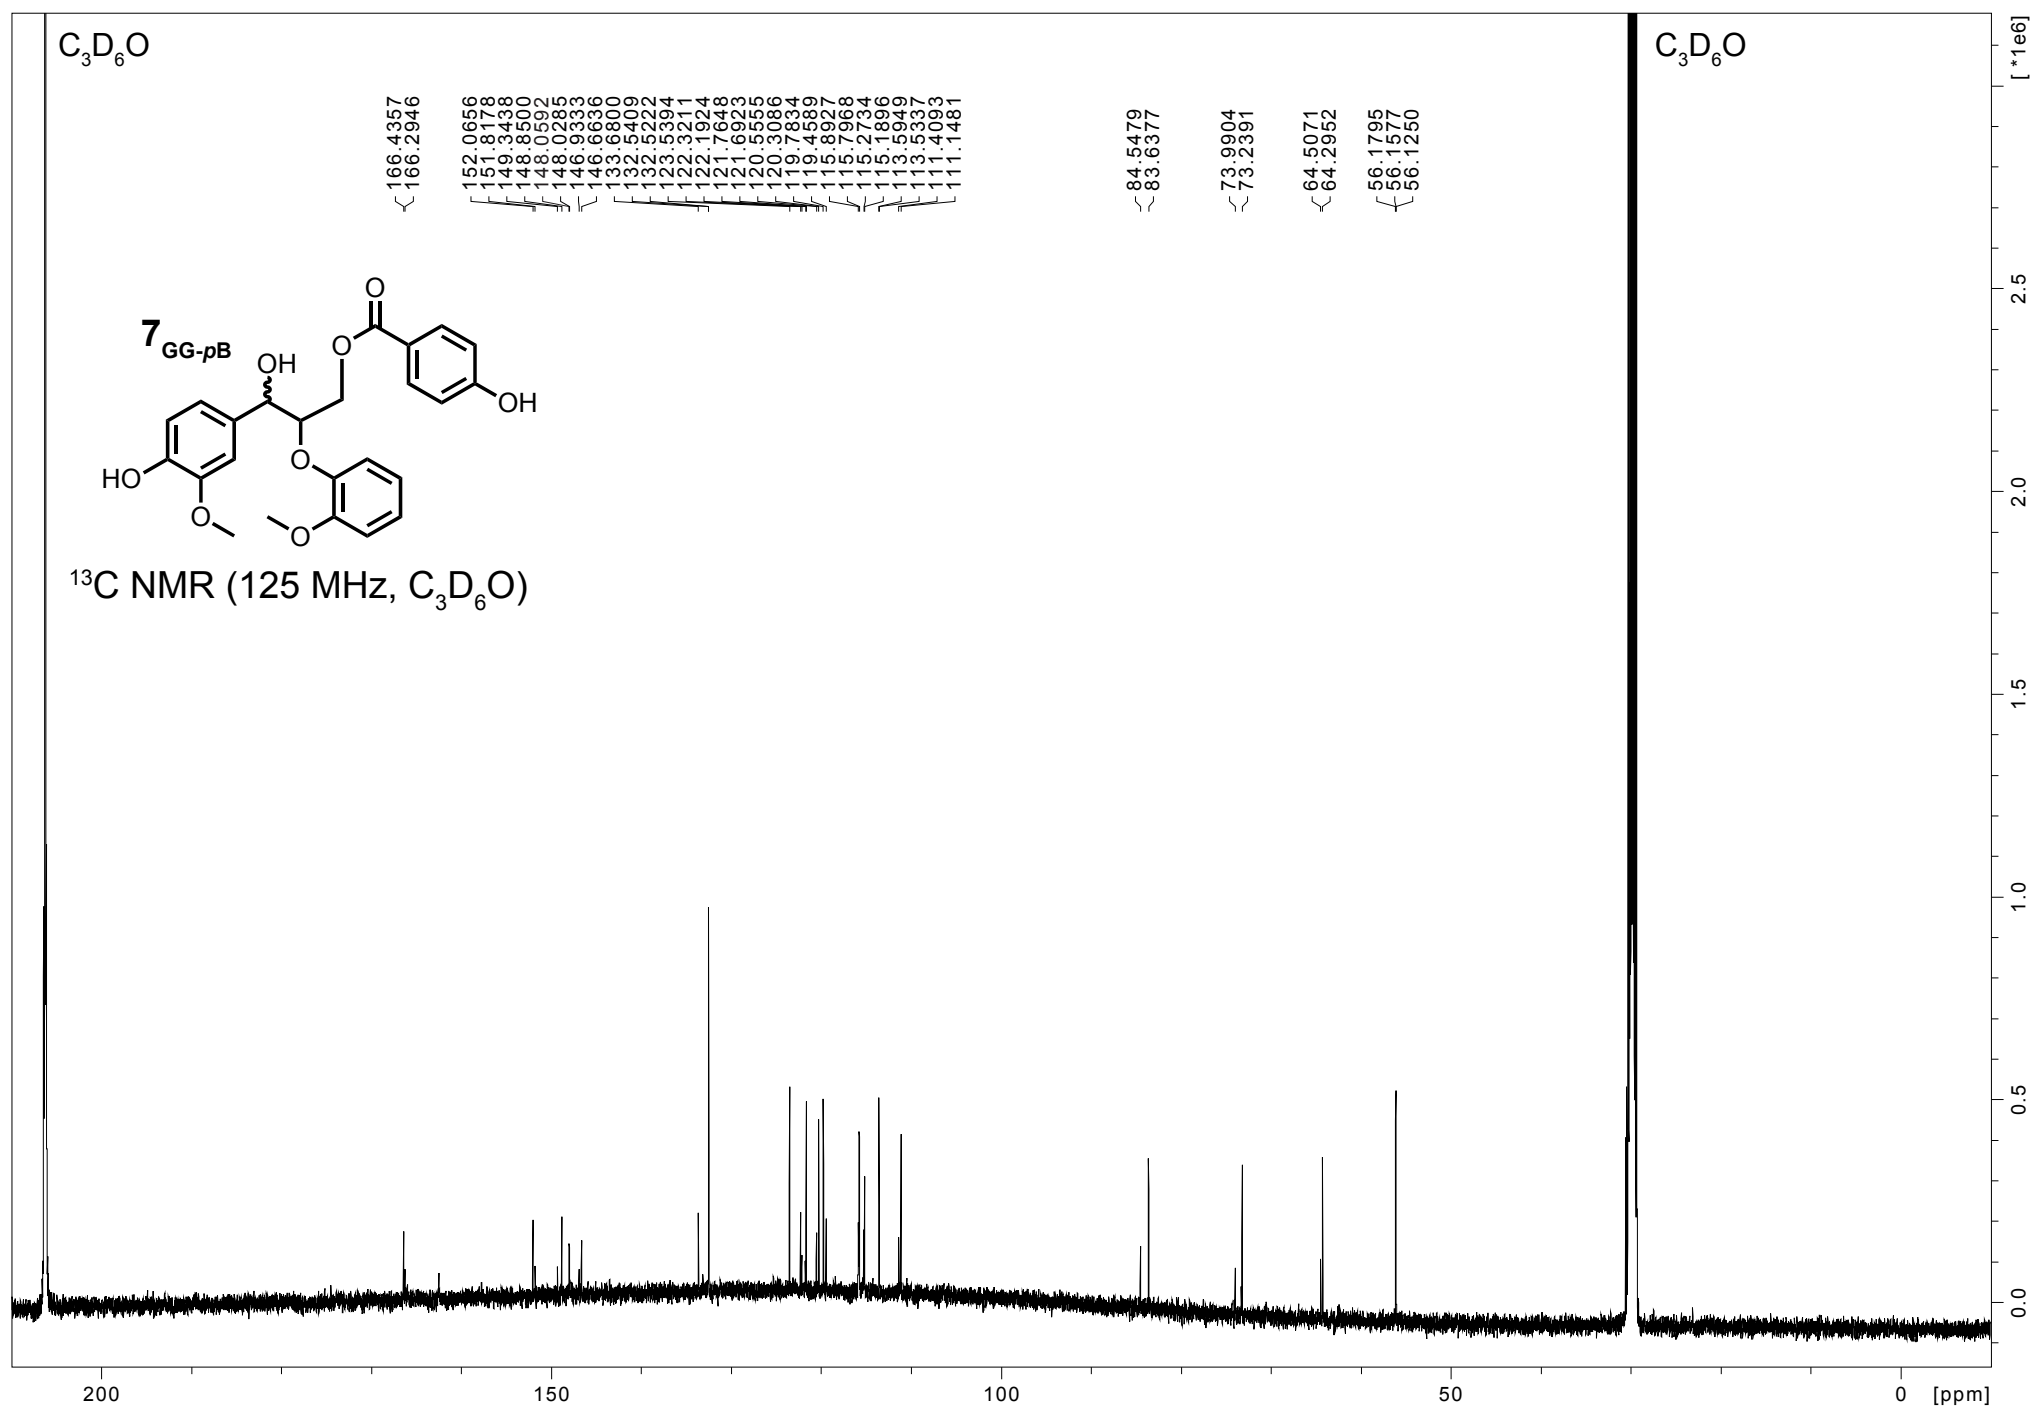

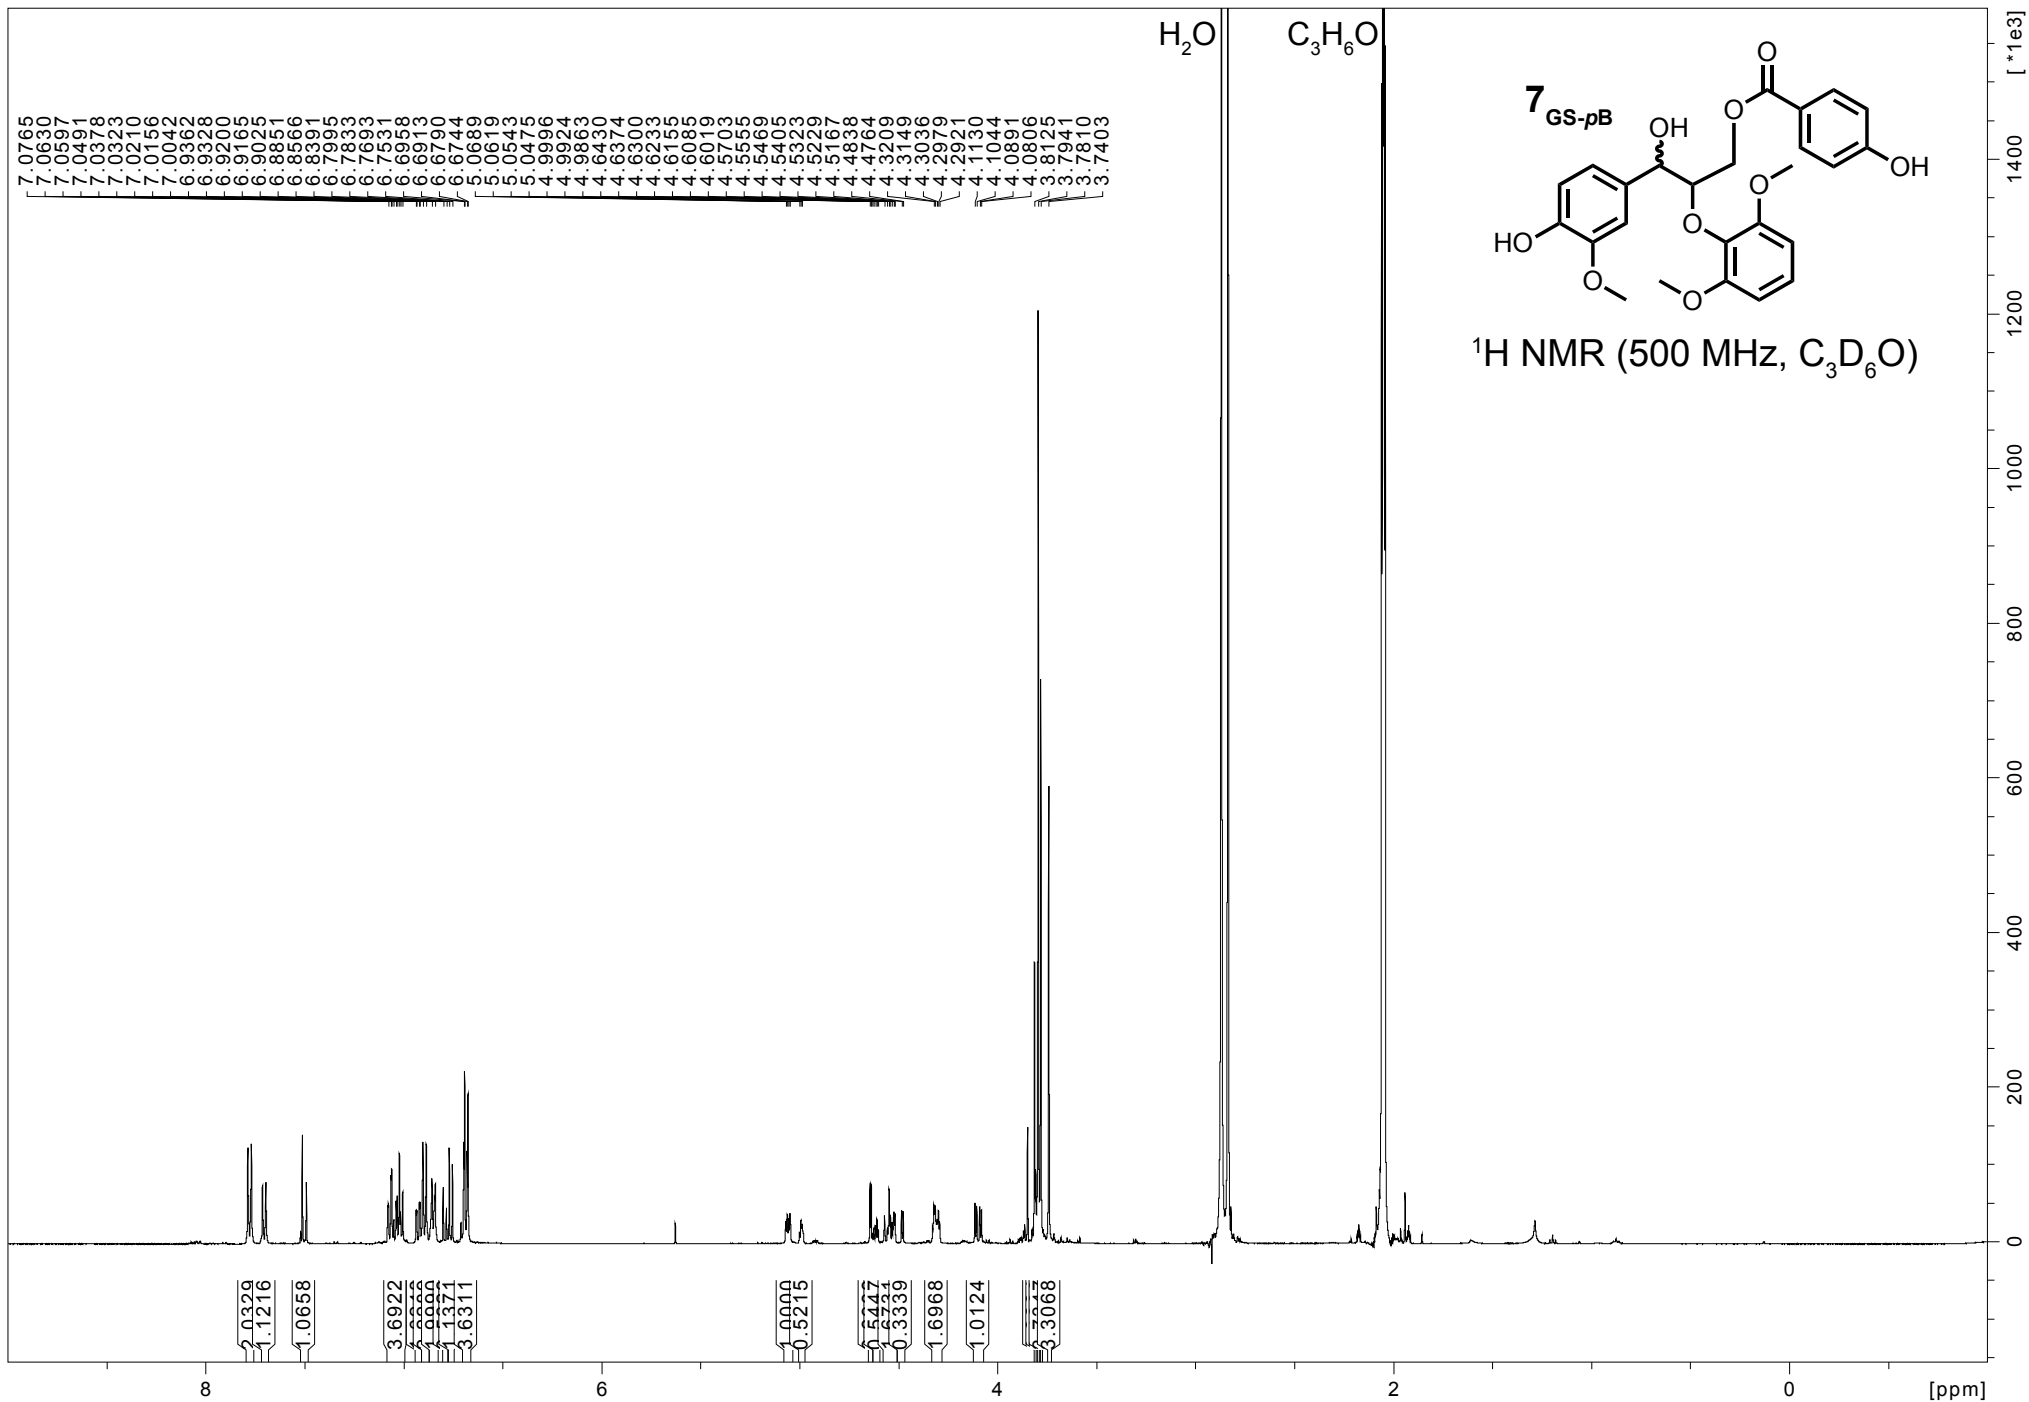

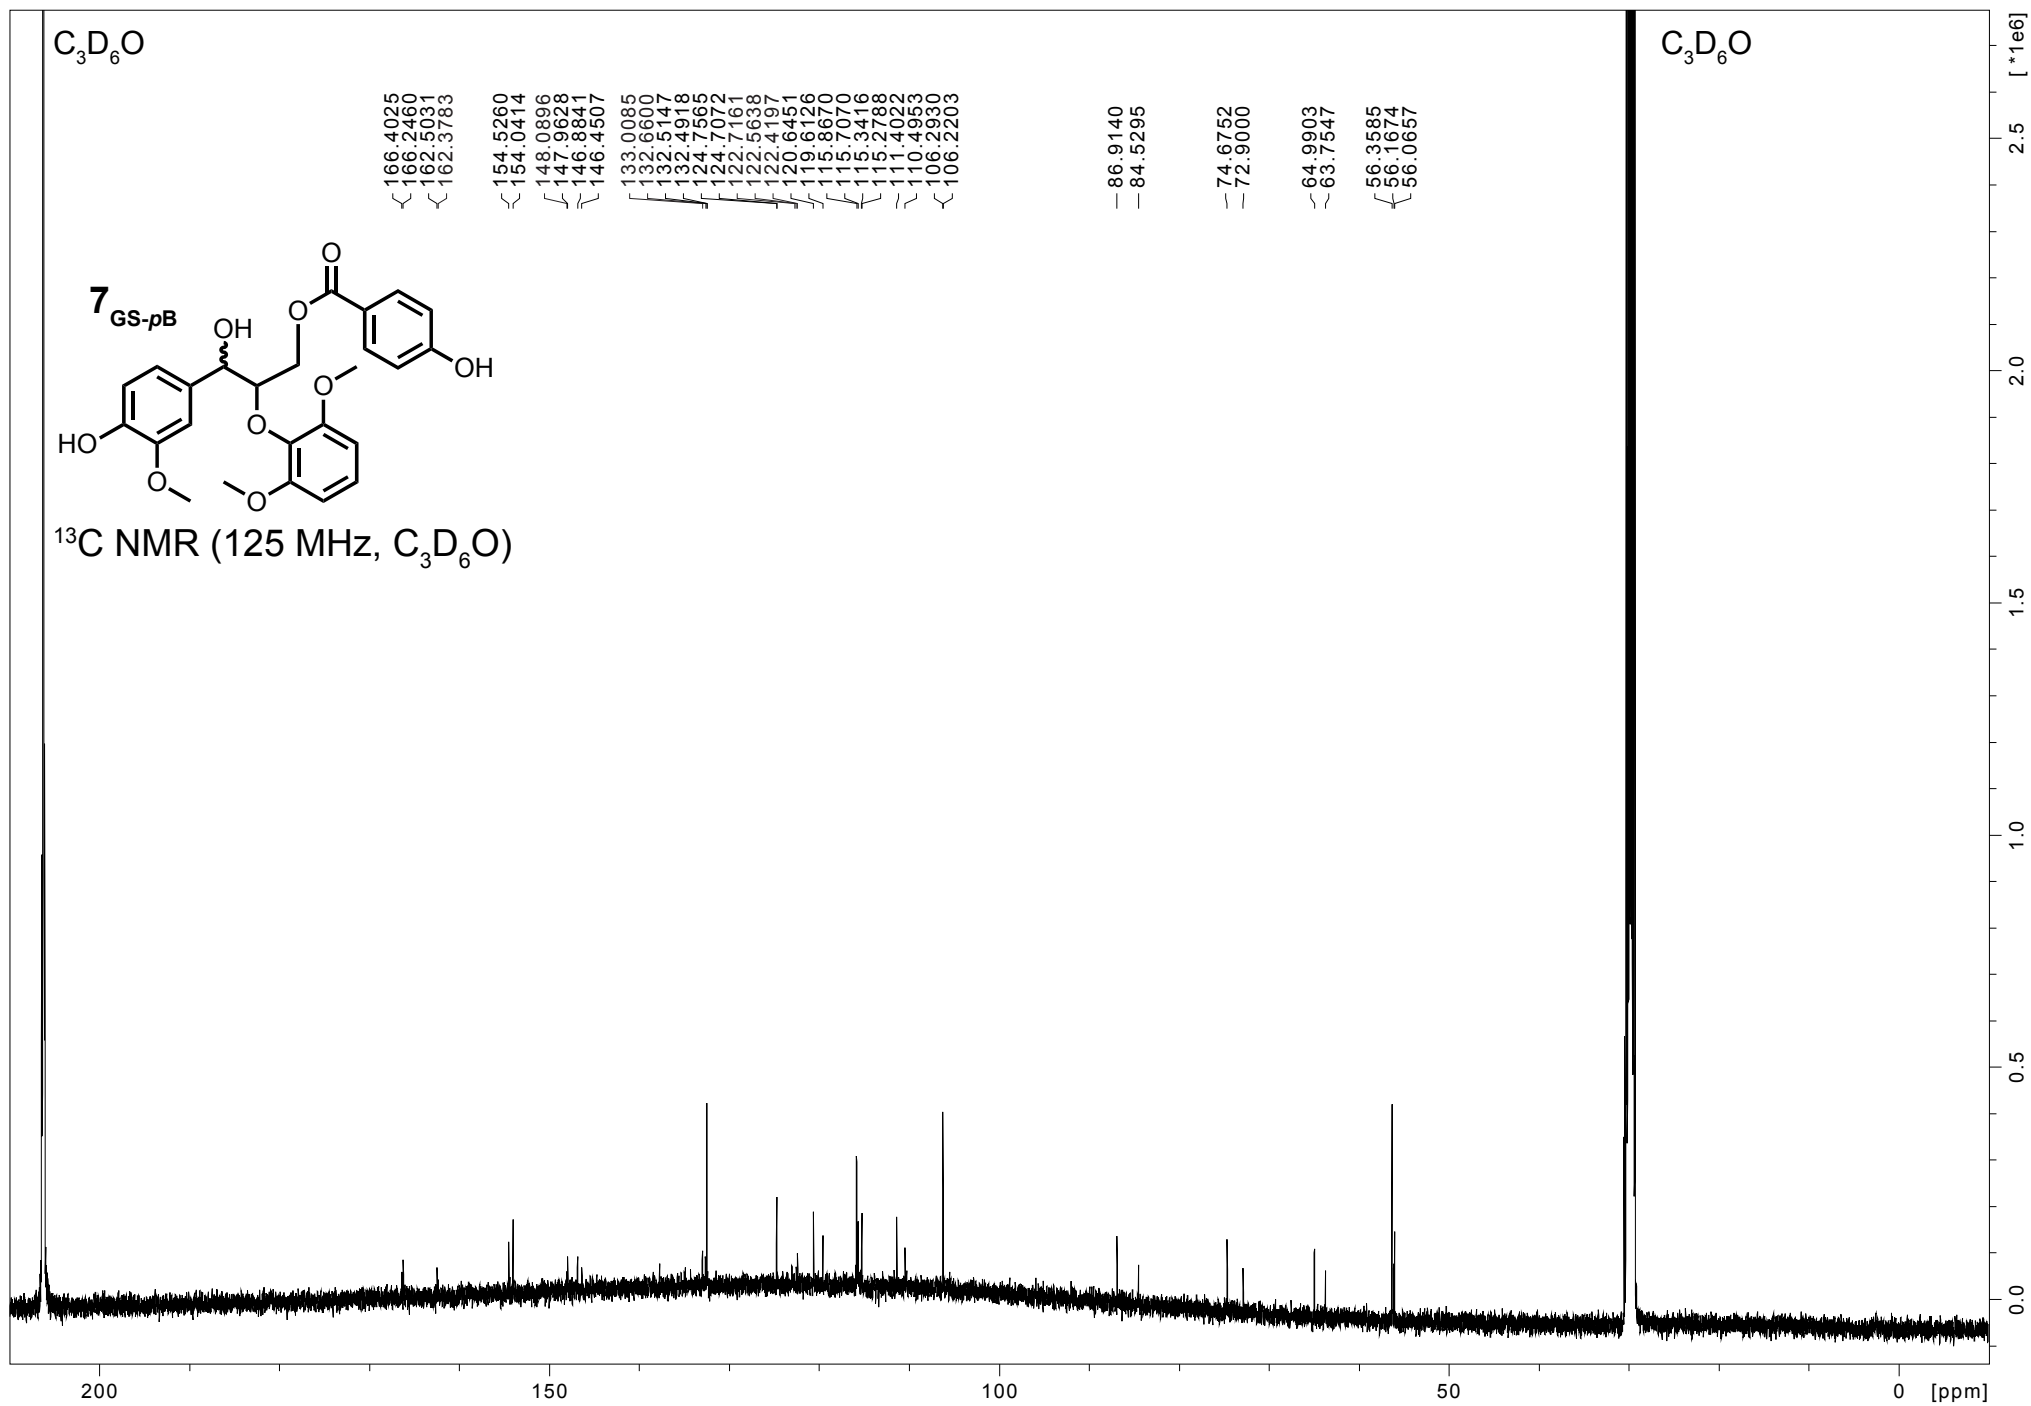

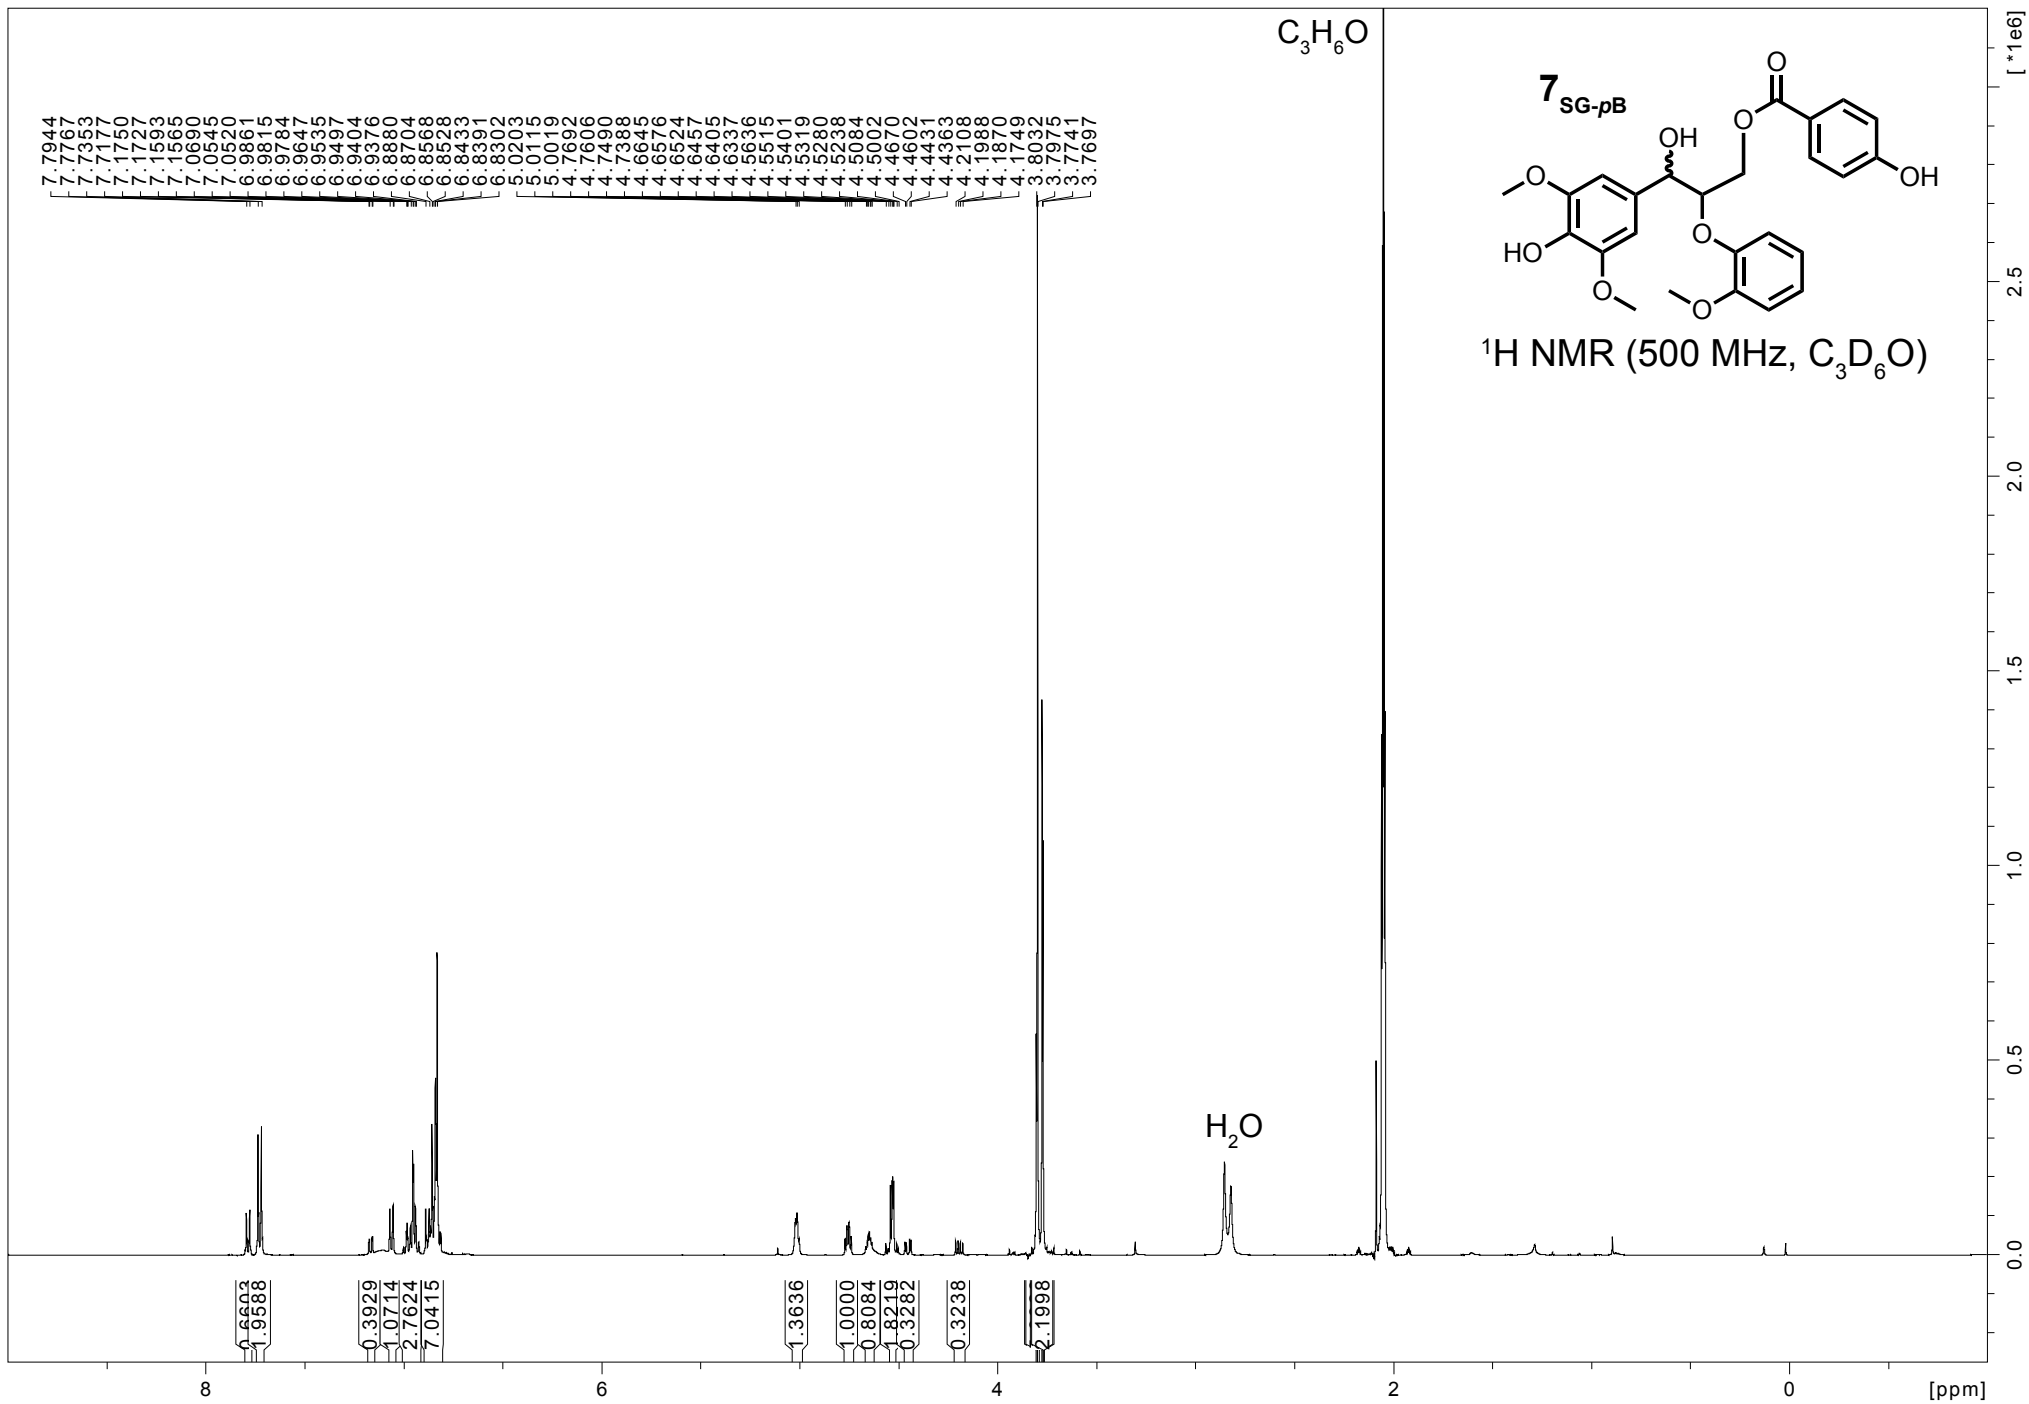



C<sub>3</sub>D<sub>6</sub>O

C<sub>3</sub>D<sub>6</sub>O

6  
5  
4  
3  
2  
1  
0

- 166.4322
- 166.2963
- 162.4643
- 152.0220
- 148.8638
- 148.3800
- 135.9992
- 132.6267
- 132.5270
- 123.4955
- 122.3634
- 122.2451
- 121.7664
- 121.6904
- 119.6618
- 119.3405
- 115.8982
- 115.7972
- 113.5726
- 113.5337
- 105.2991
- 105.1171
- 84.4138
- 83.4958
- 74.1803
- 73.4679
- 64.5430
- 64.3395
- 56.5595
- 56.4937
- 56.1691
- 56.1267

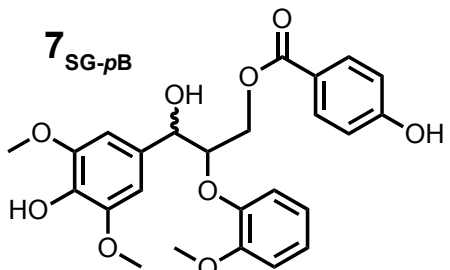

<sup>13</sup>C NMR (125 MHz, C<sub>3</sub>D<sub>6</sub>O)

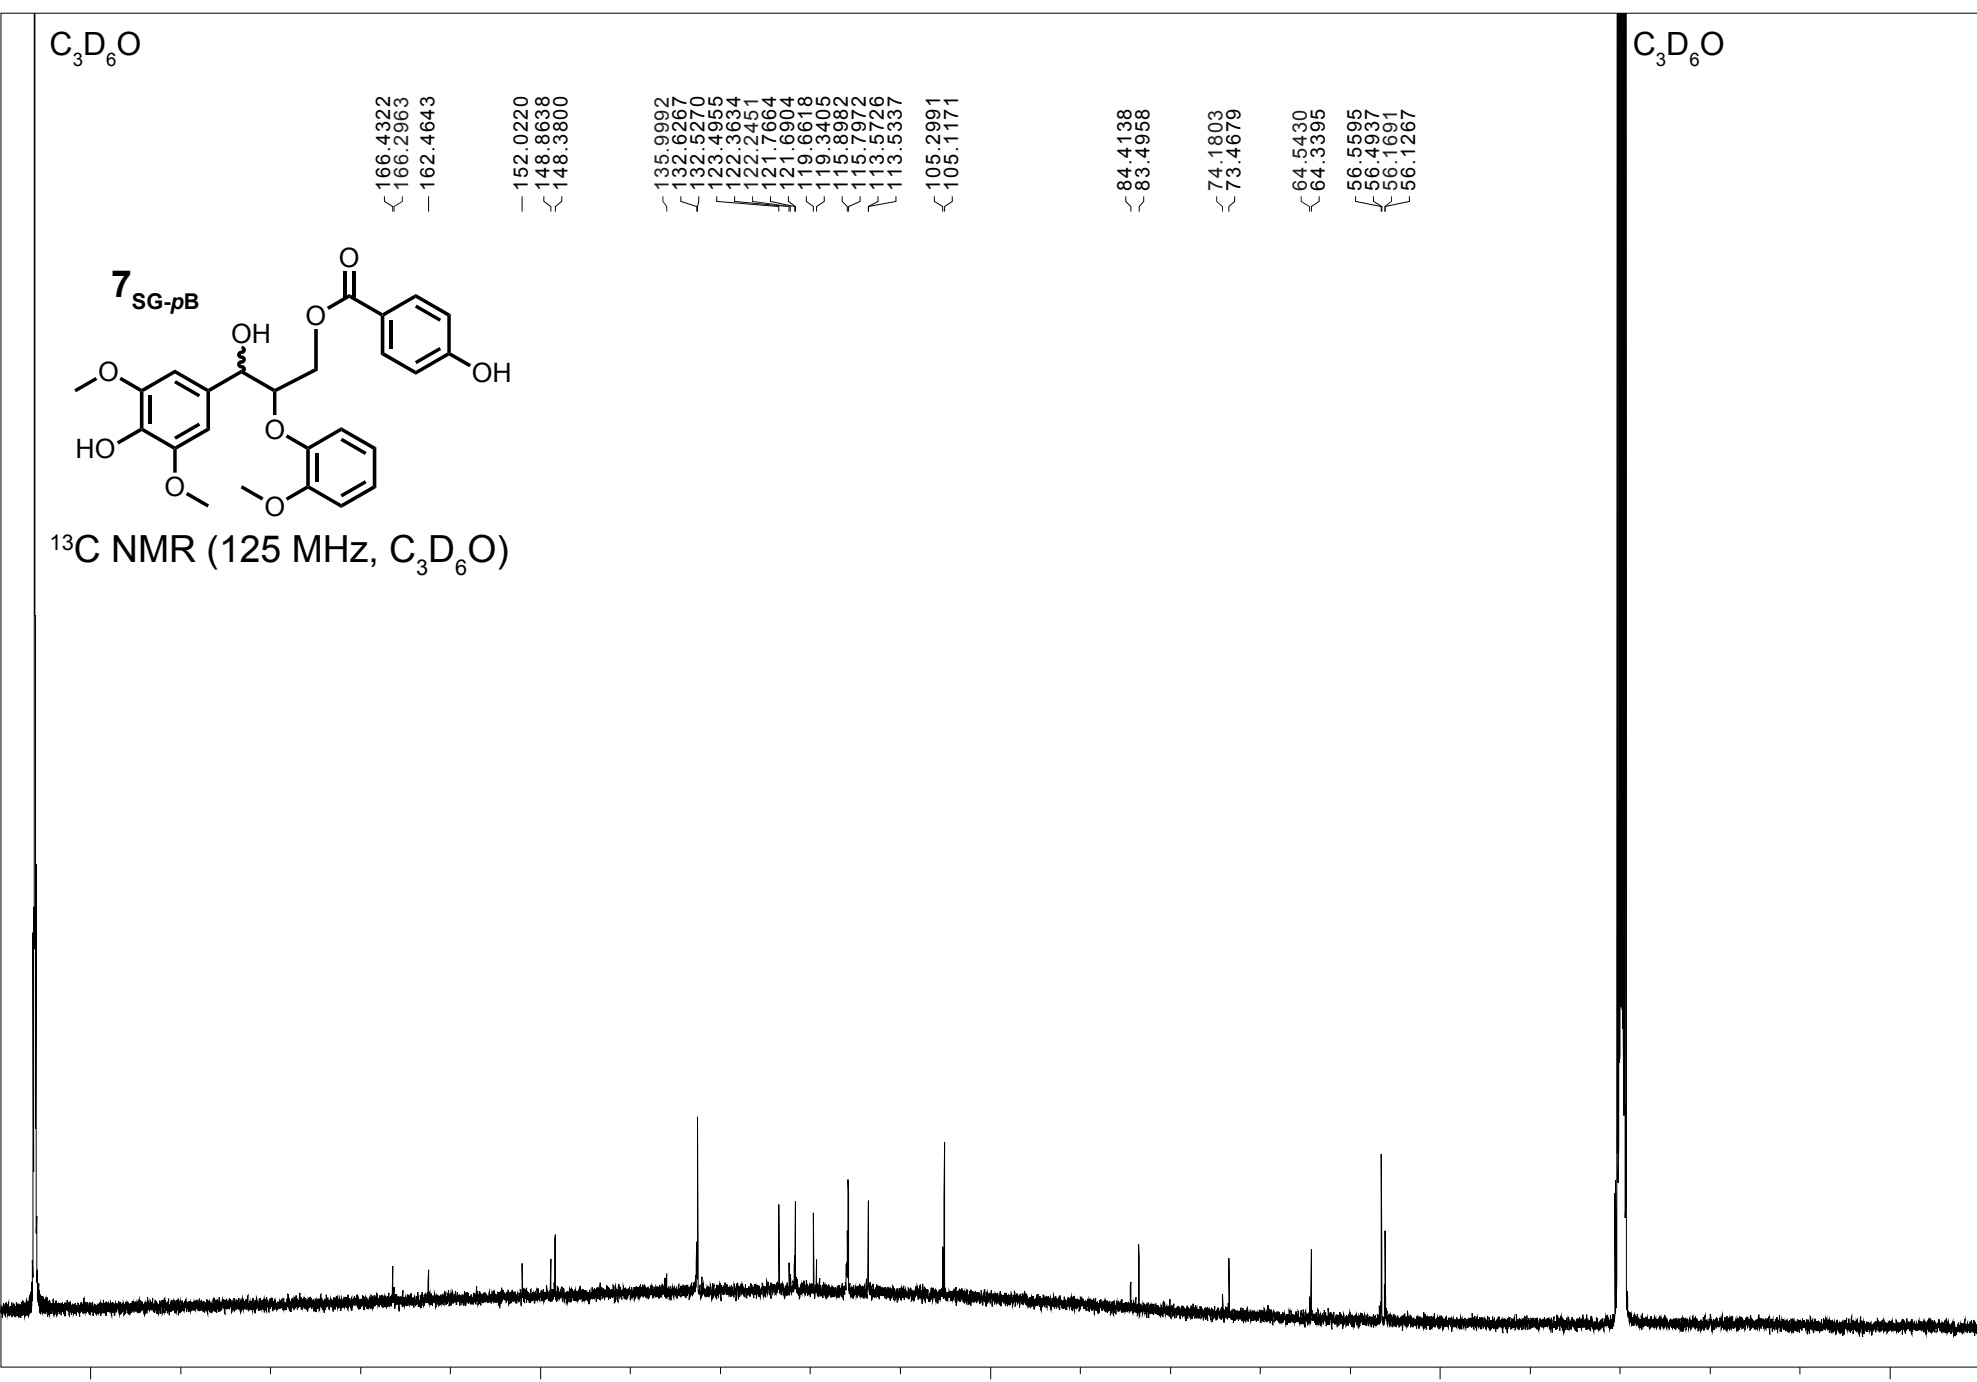

200

150

100

50

0 [ppm]

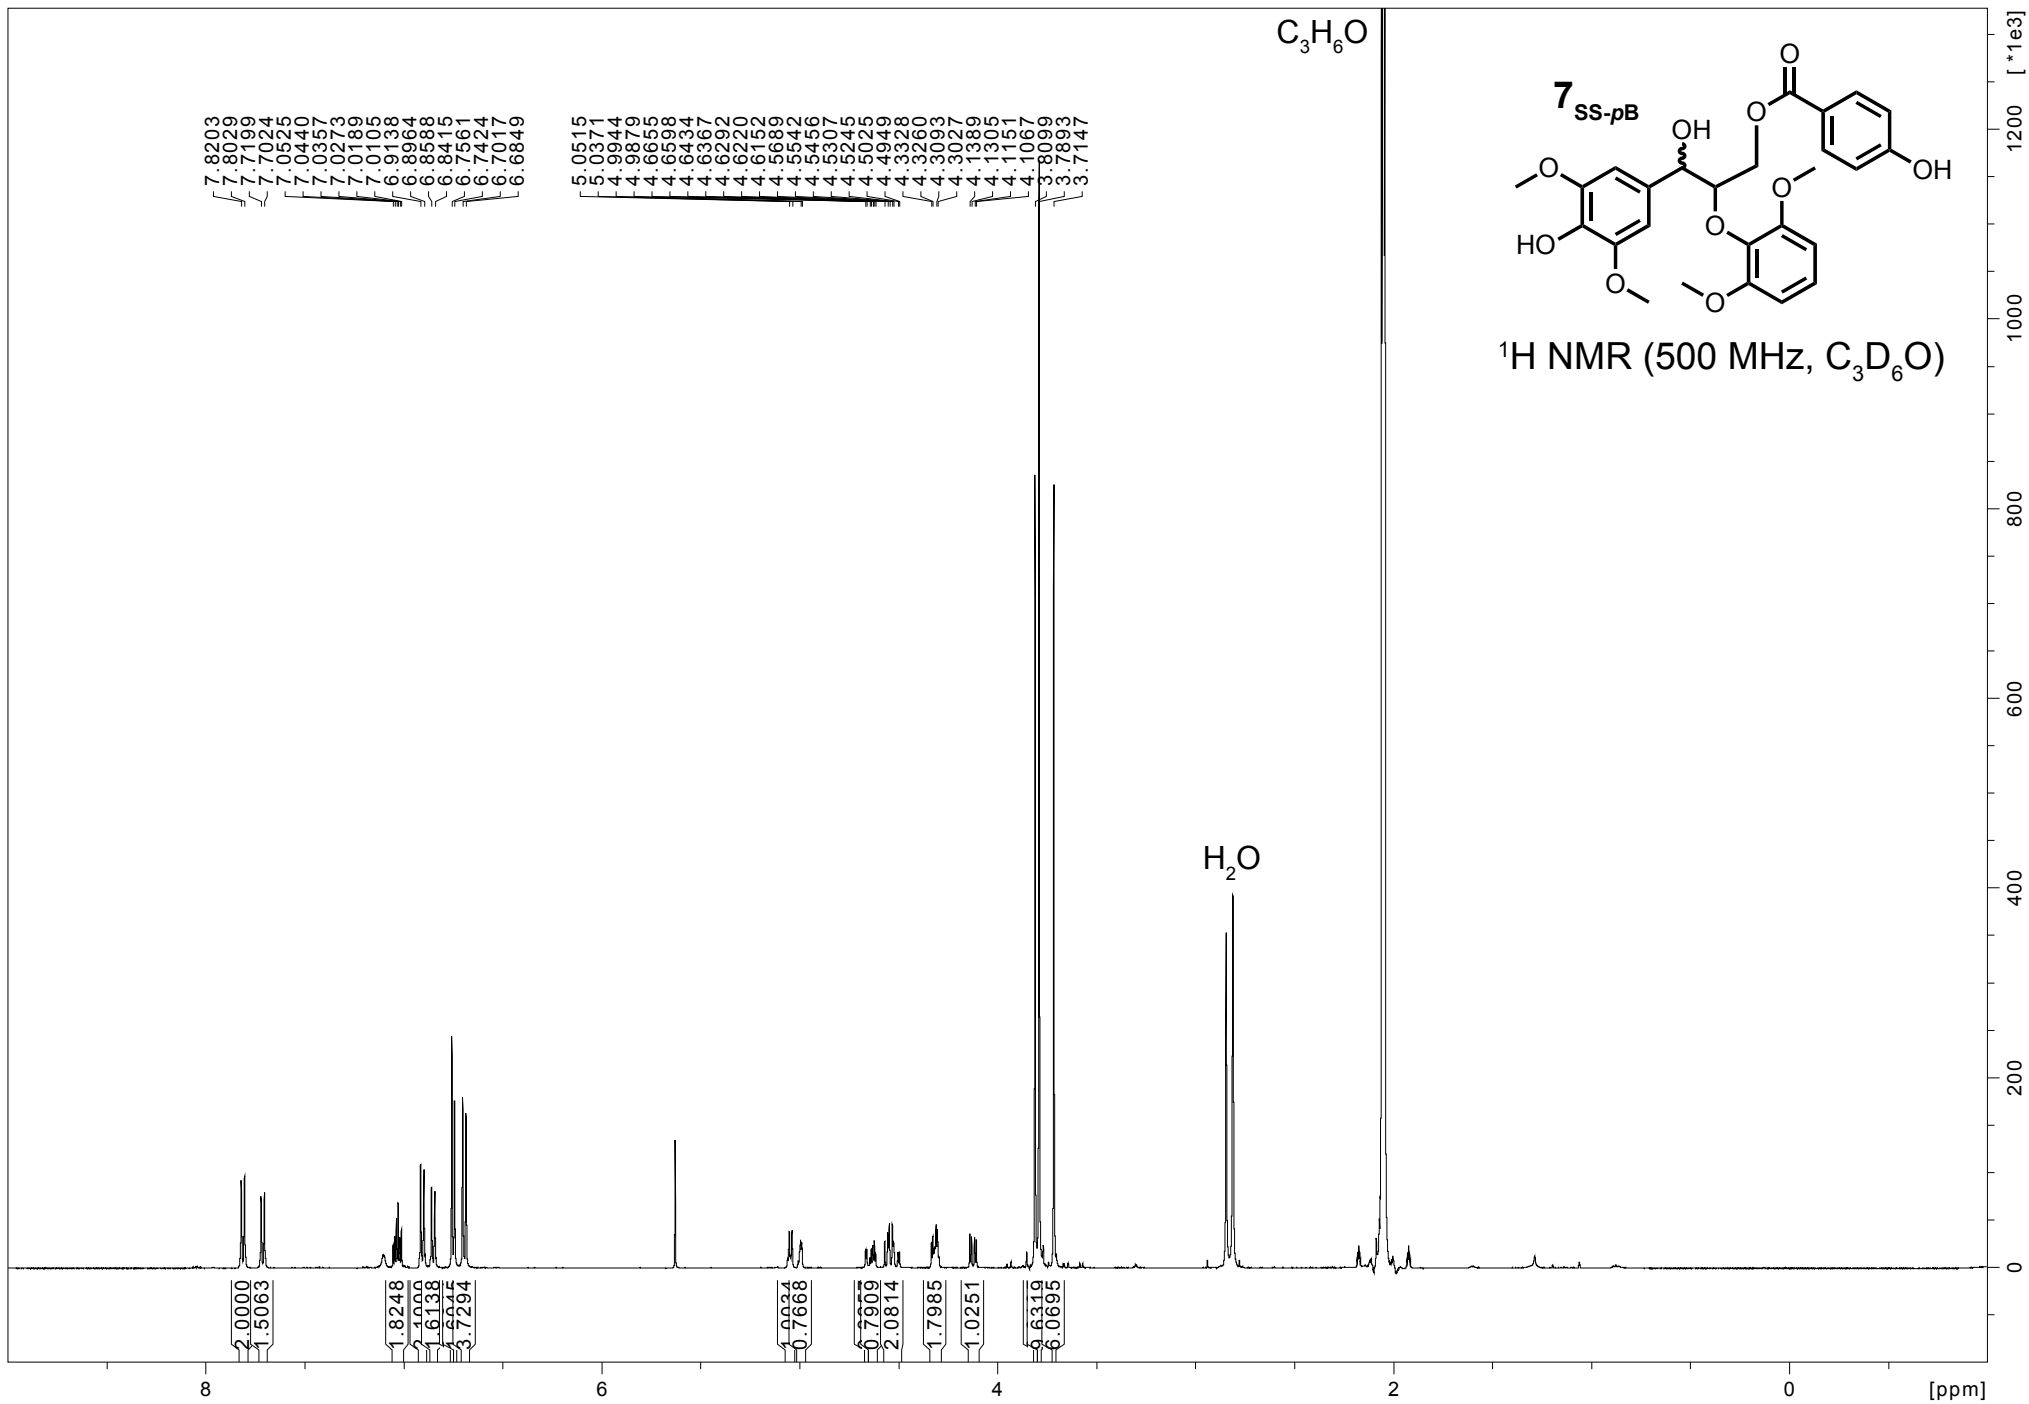

C<sub>3</sub>D<sub>6</sub>O

C<sub>3</sub>D<sub>6</sub>O

[\*1e6]

166.3956  
166.2511  
162.4927  
162.3483

154.5093  
154.0465  
148.4739  
148.3423

137.7994  
136.4798  
136.1725  
135.8122  
132.5169  
132.4908

124.7307  
122.6069  
122.4577

115.9008  
115.7137

106.3289  
106.2220  
105.3028  
104.4539

-87.0171  
-84.5324

-74.9326  
-73.1179

-65.0679  
-63.7897

-56.5493  
-56.4254  
-56.3934  
-56.3586

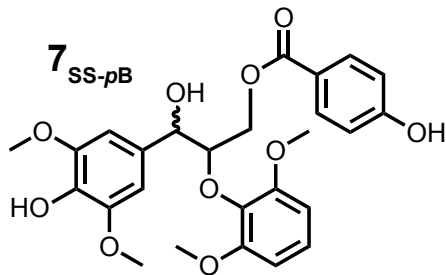

<sup>13</sup>C NMR (125 MHz, C<sub>3</sub>D<sub>6</sub>O)

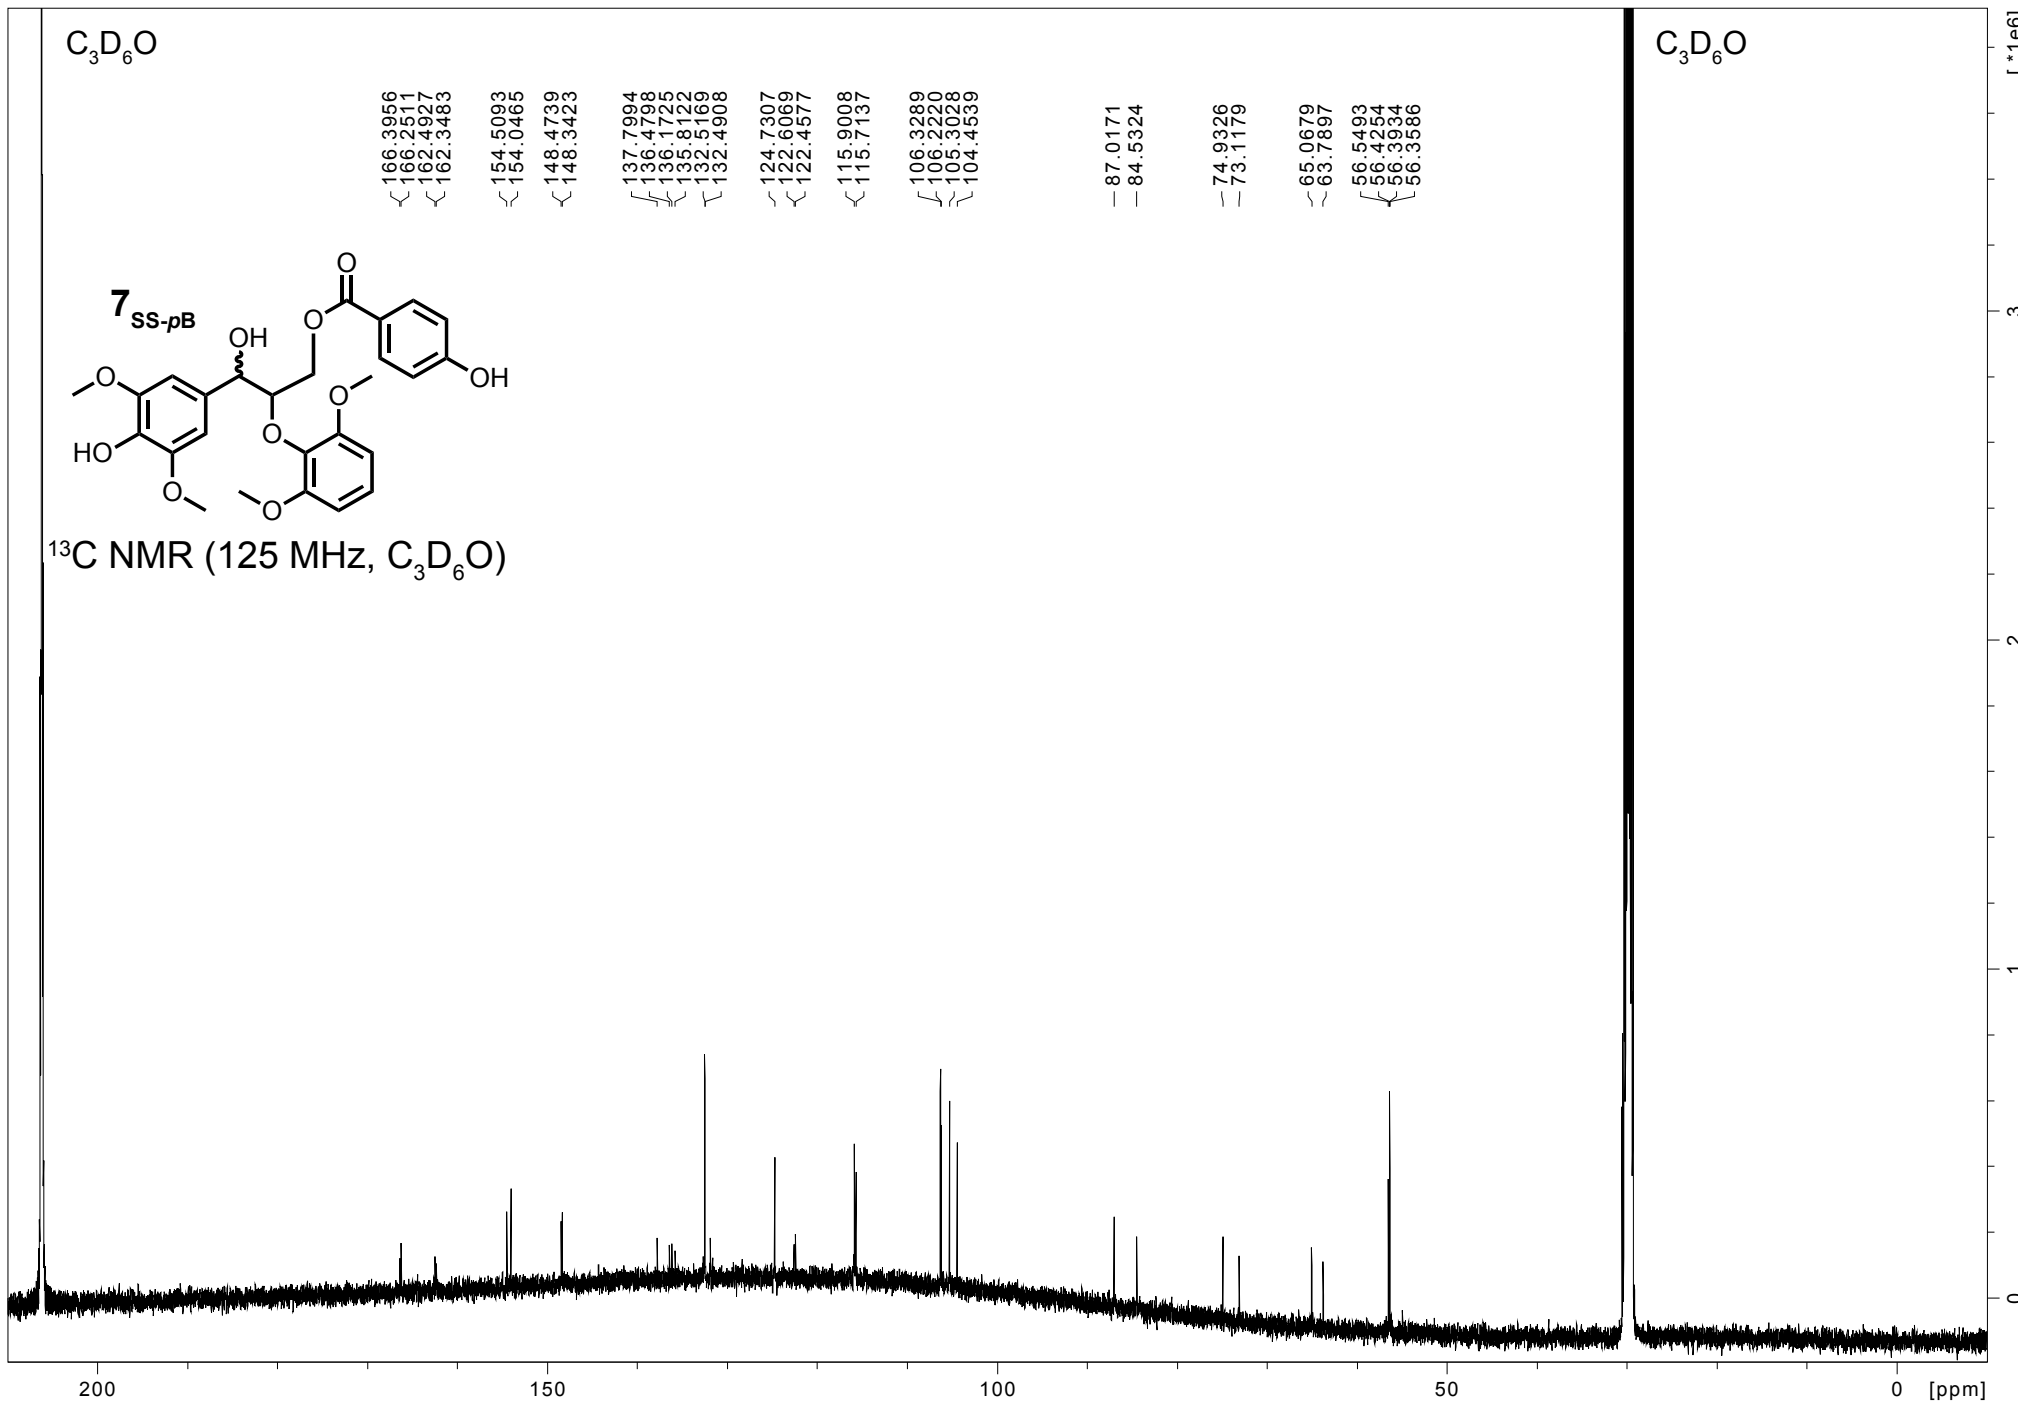

200

150

100

50

0 [ppm]

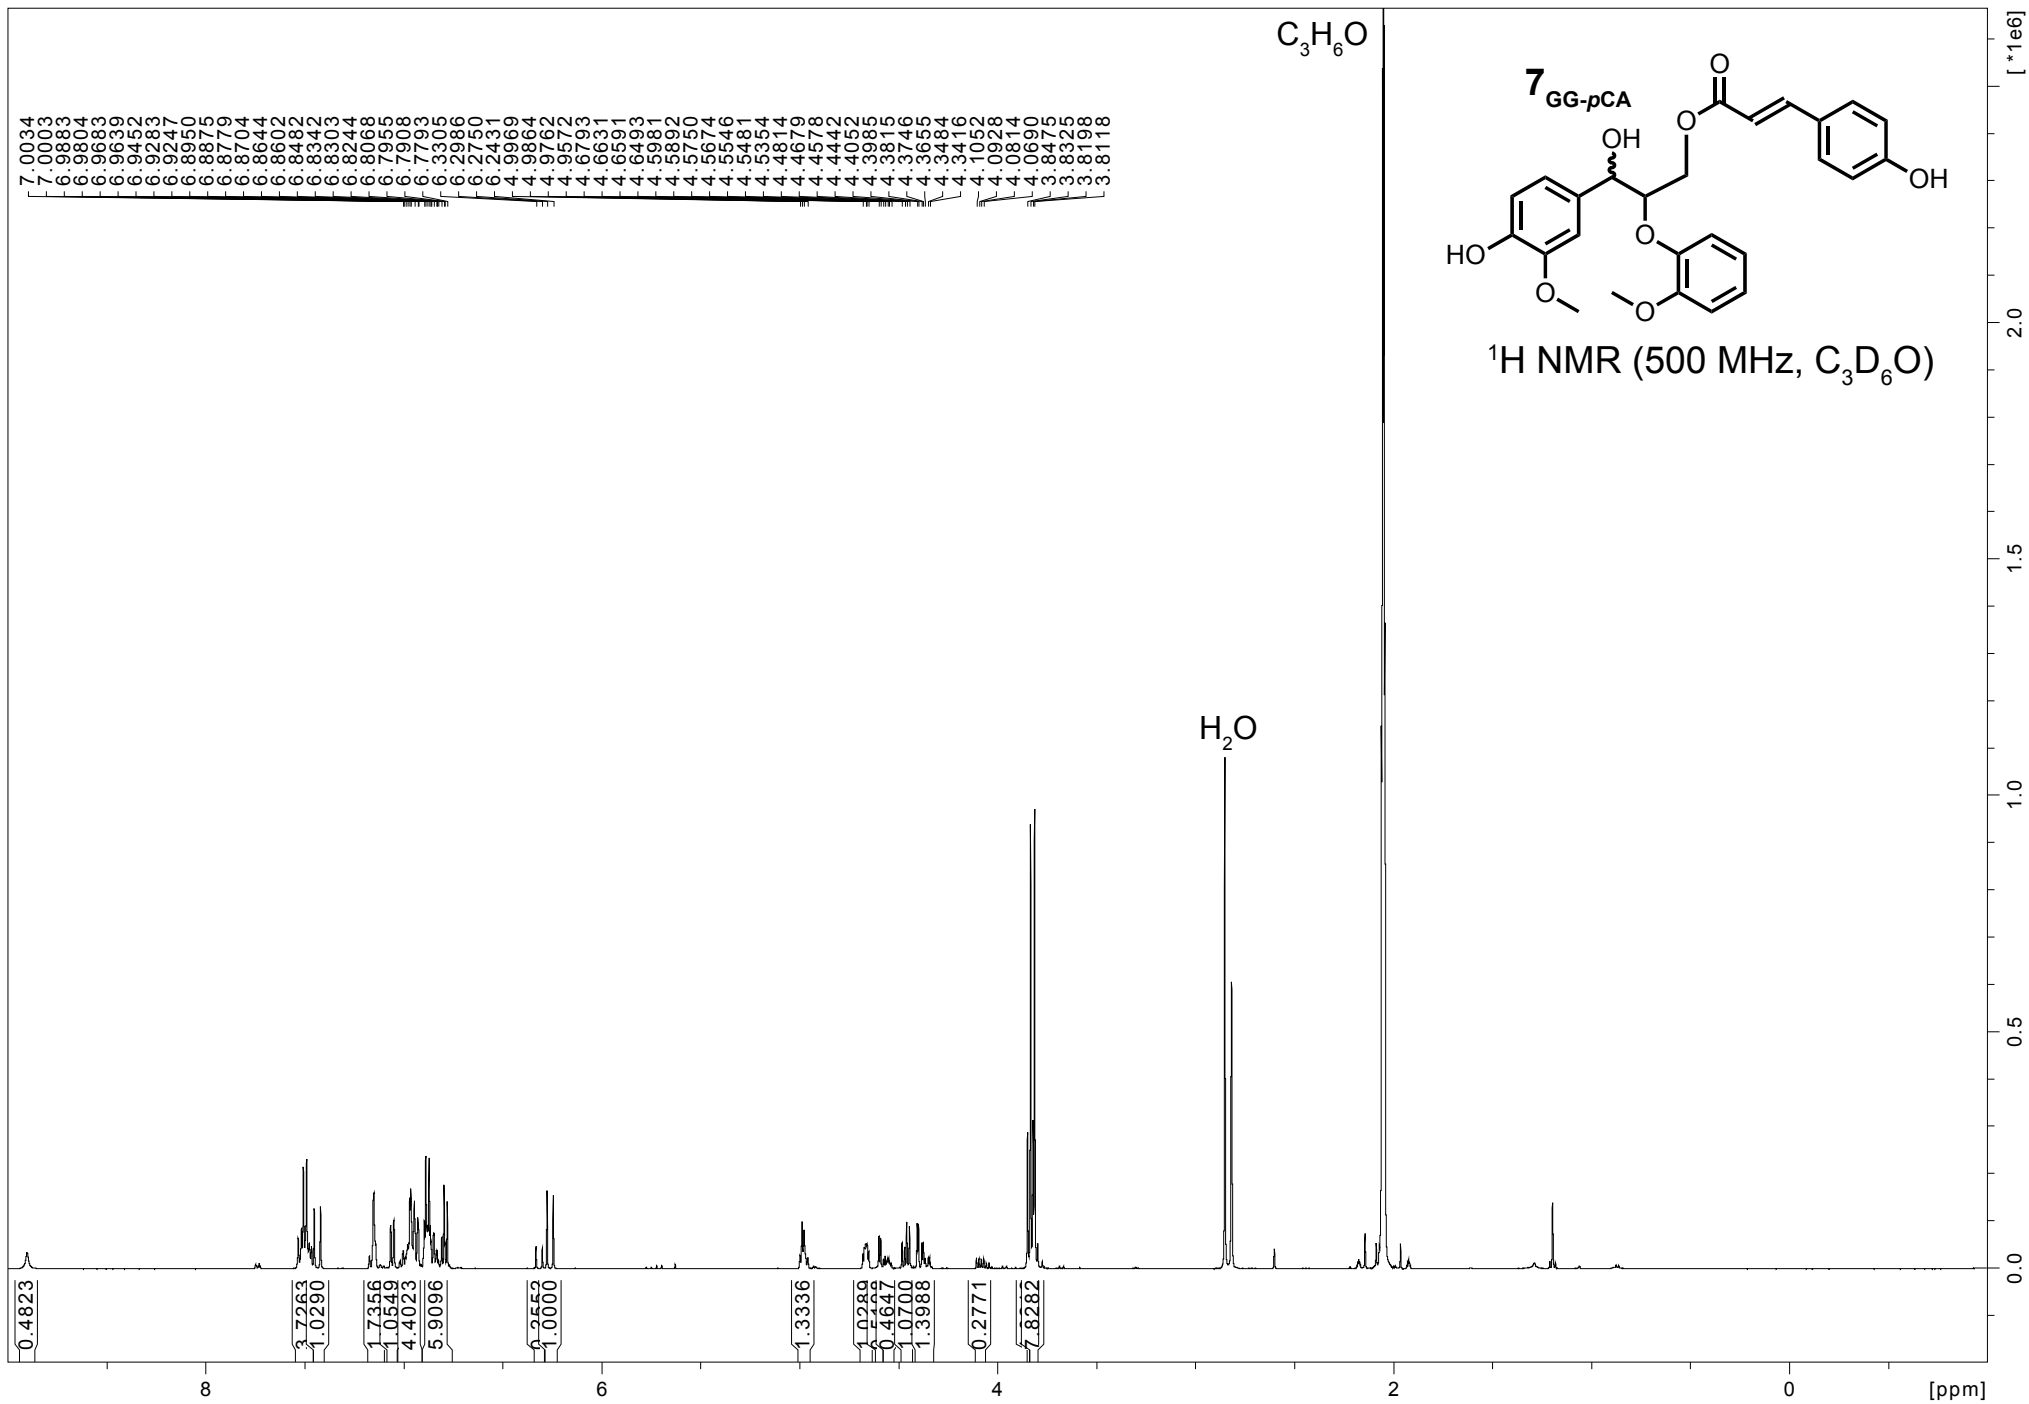

C<sub>3</sub>D<sub>6</sub>O

C<sub>3</sub>D<sub>6</sub>O

167.2697  
167.1552  
160.4543  
152.0622  
151.8163  
149.3870  
148.8890  
148.0243  
147.9876  
146.7447  
146.6399  
145.5730  
145.4072  
133.7611  
133.6332  
131.0041  
130.9495  
126.9523  
126.9403  
123.5665  
123.5238  
121.8095  
121.7160  
120.5577  
120.3023  
119.6929  
119.4436  
116.6612  
116.5769  
115.3810  
115.2606  
115.2467  
115.1621  
113.5924  
113.5204  
111.3898  
111.1436

~ 84.5936  
~ 83.5709

~ 73.2516  
~ 73.1397

~ 64.2096  
~ 64.0044

~ 56.2288  
~ 56.2012  
~ 56.1844  
~ 56.1586

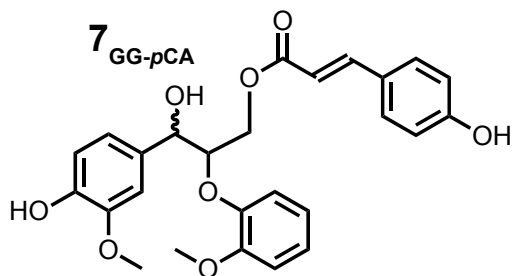

<sup>13</sup>C NMR (125 MHz, C<sub>3</sub>D<sub>6</sub>O)

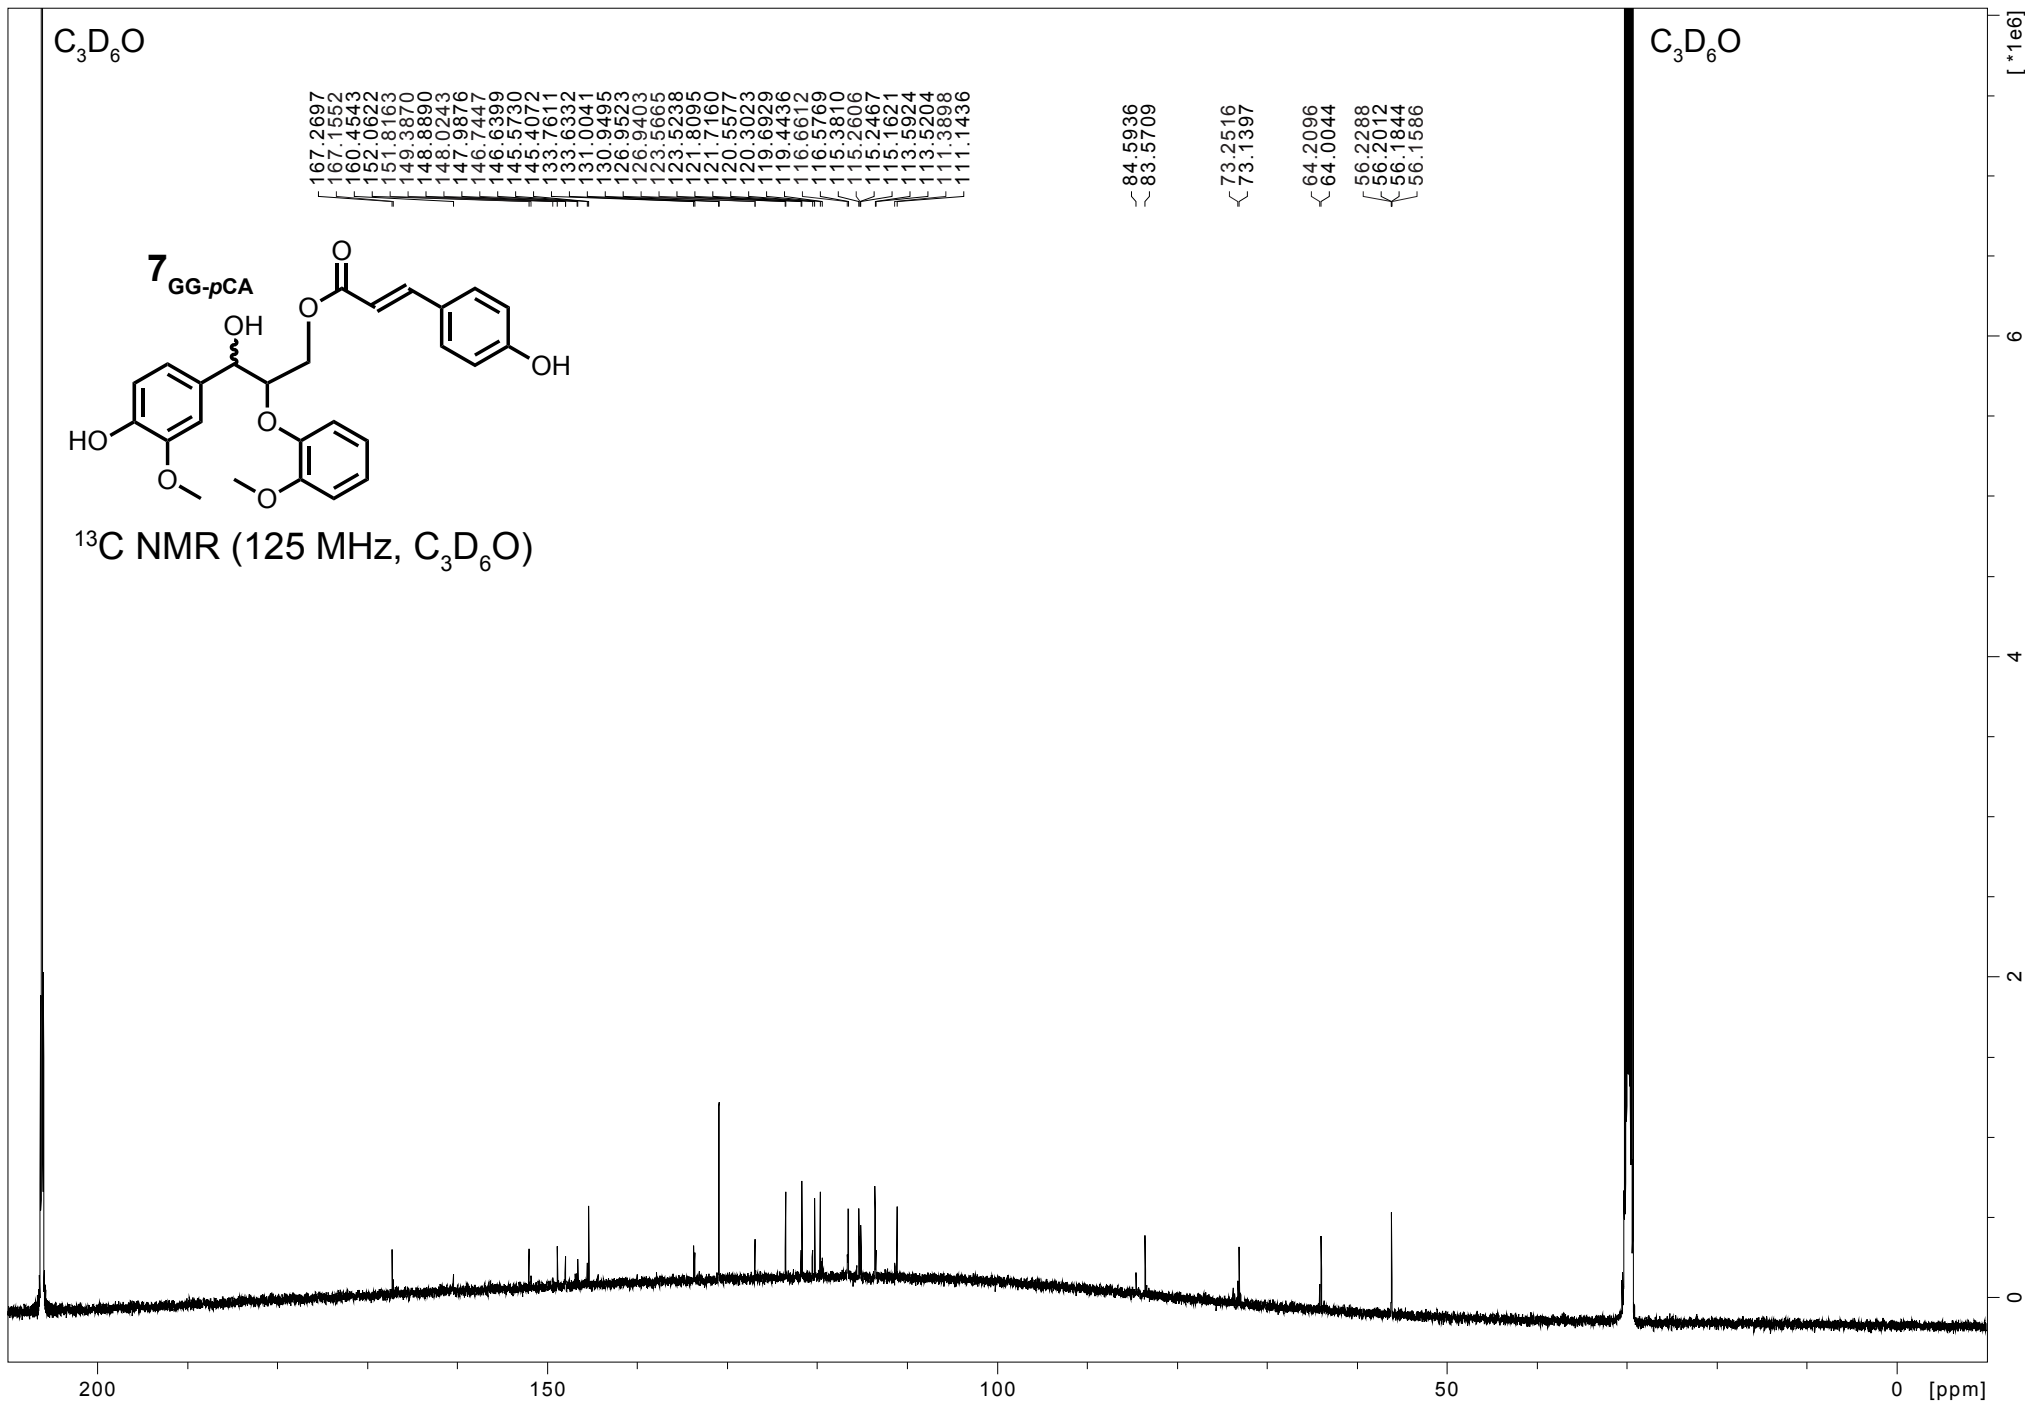

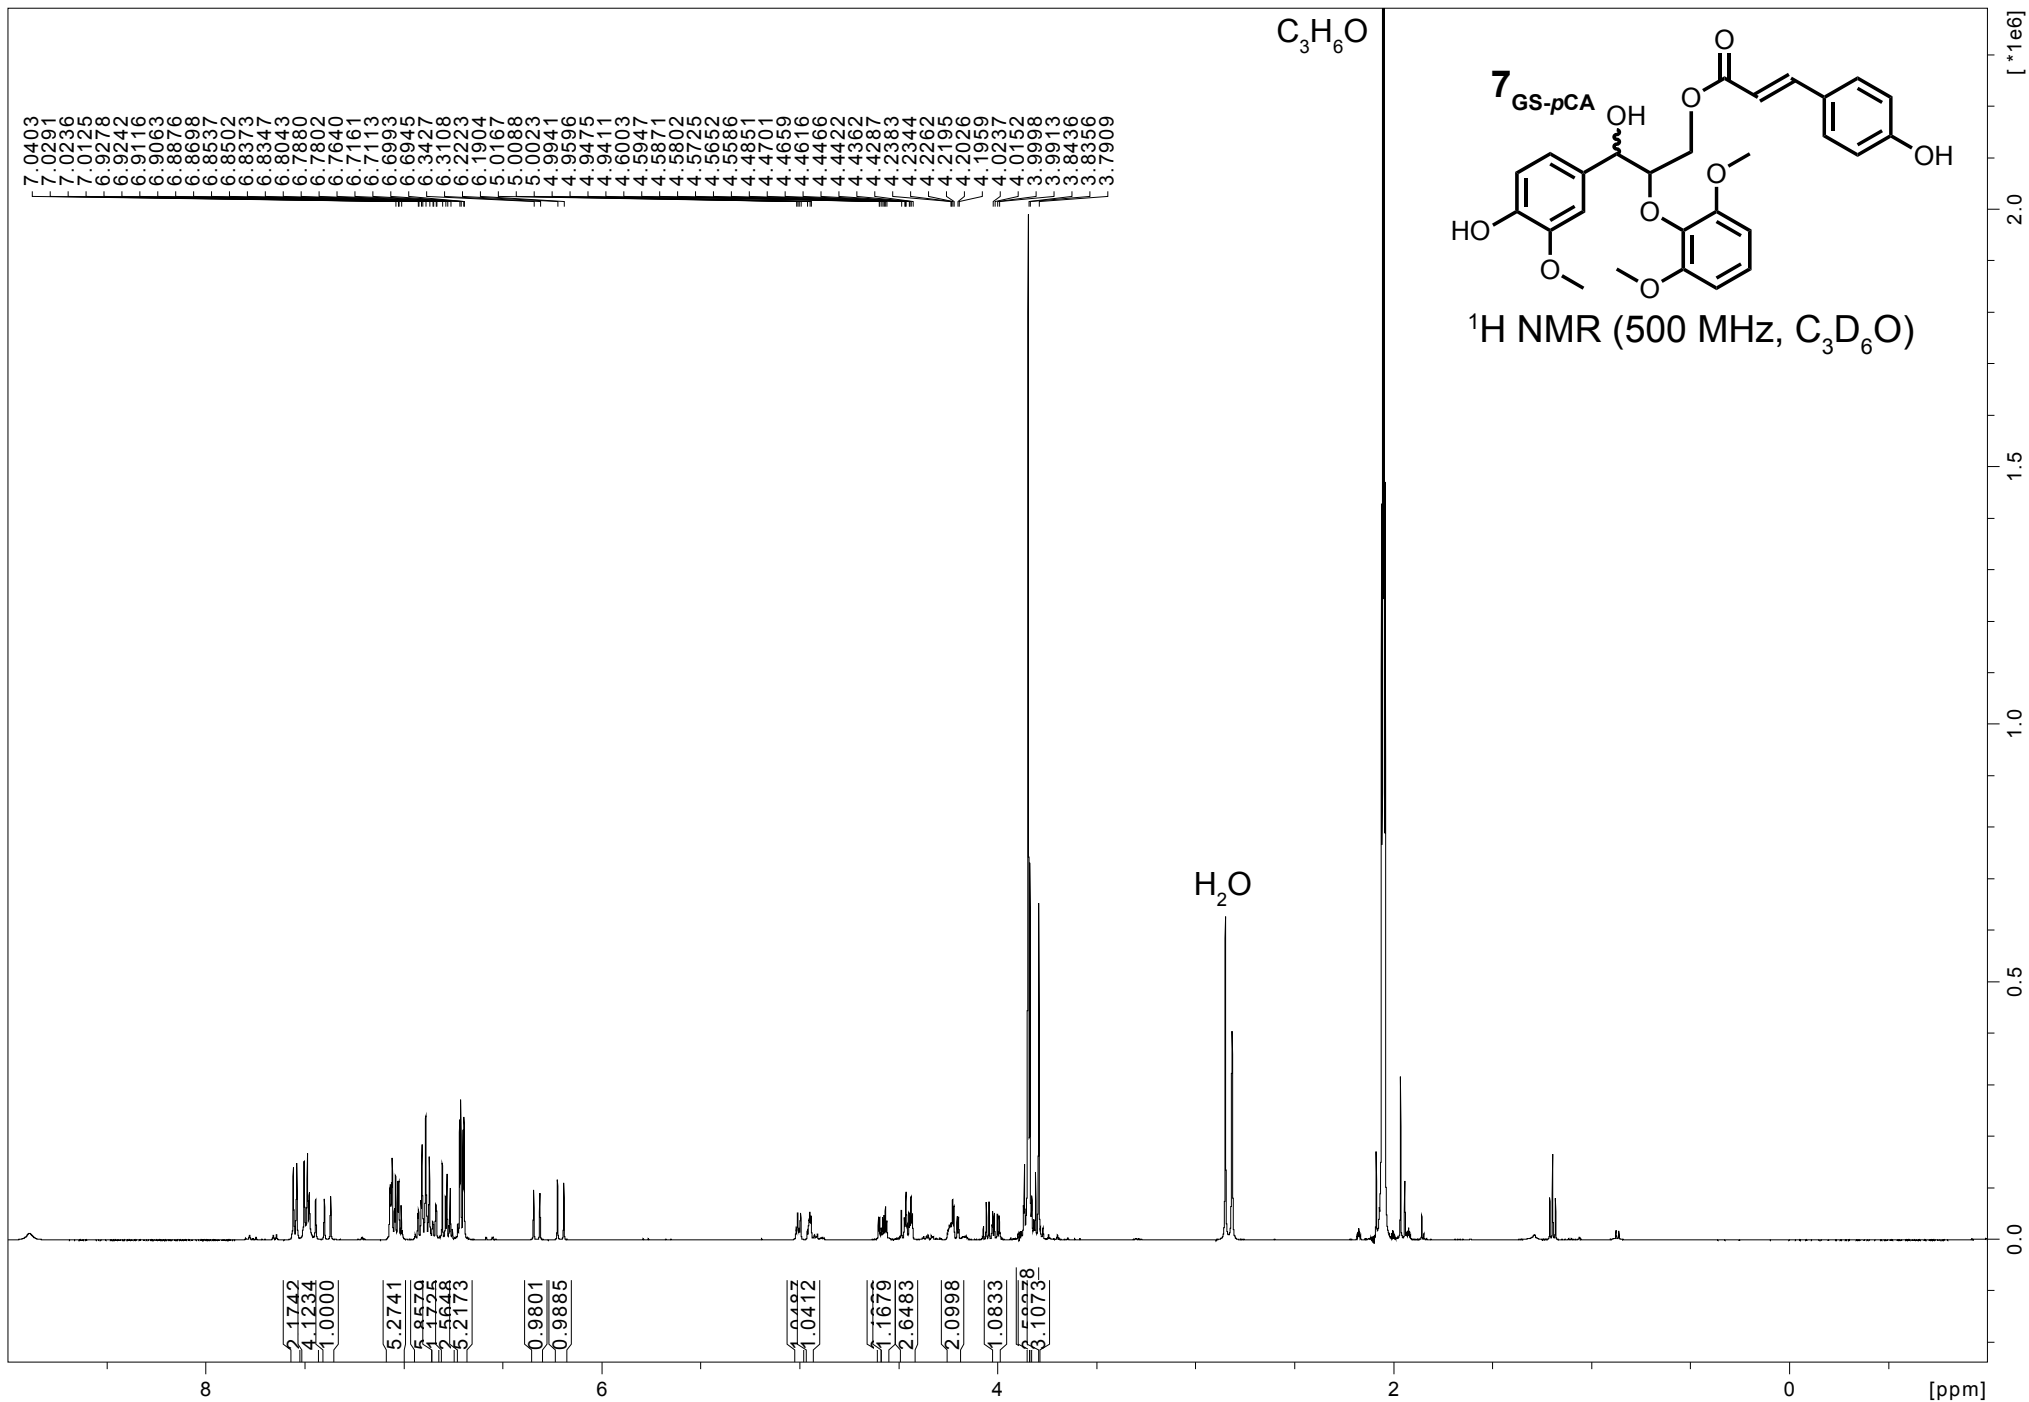

C<sub>3</sub>D<sub>6</sub>O

C<sub>3</sub>D<sub>6</sub>O

[ \*1e6]

- 167.1706
- 167.1032
- 160.4640
- 160.3931
- 154.5461
- 154.0322
- 148.0414
- 147.9327
- 146.8488
- 146.4192
- 145.2390
- 145.0086
- 137.8200
- 136.4564
- 133.8664
- 133.0258
- 132.6329
- 130.9661
- 130.8610
- 126.9911
- 124.7871
- 124.7329
- 120.6479
- 119.6426
- 116.6680
- 116.5703
- 115.6794
- 115.5221
- 115.3060
- 111.3530
- 111.3832
- 110.5065
- 106.2804

- ~ 86.9339
- ~ 84.4330
- ~ 74.4746
- ~ 72.8657
- ~ 64.7387
- ~ 63.5560
- 56.4632
- 56.4078
- 56.1799
- 56.1327

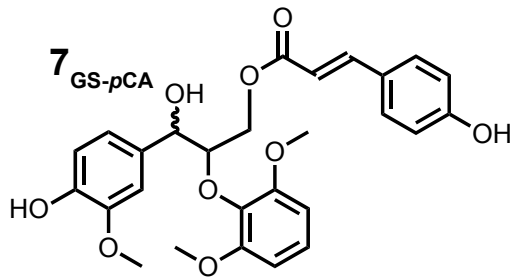

<sup>13</sup>C NMR (125 MHz, C<sub>3</sub>D<sub>6</sub>O)

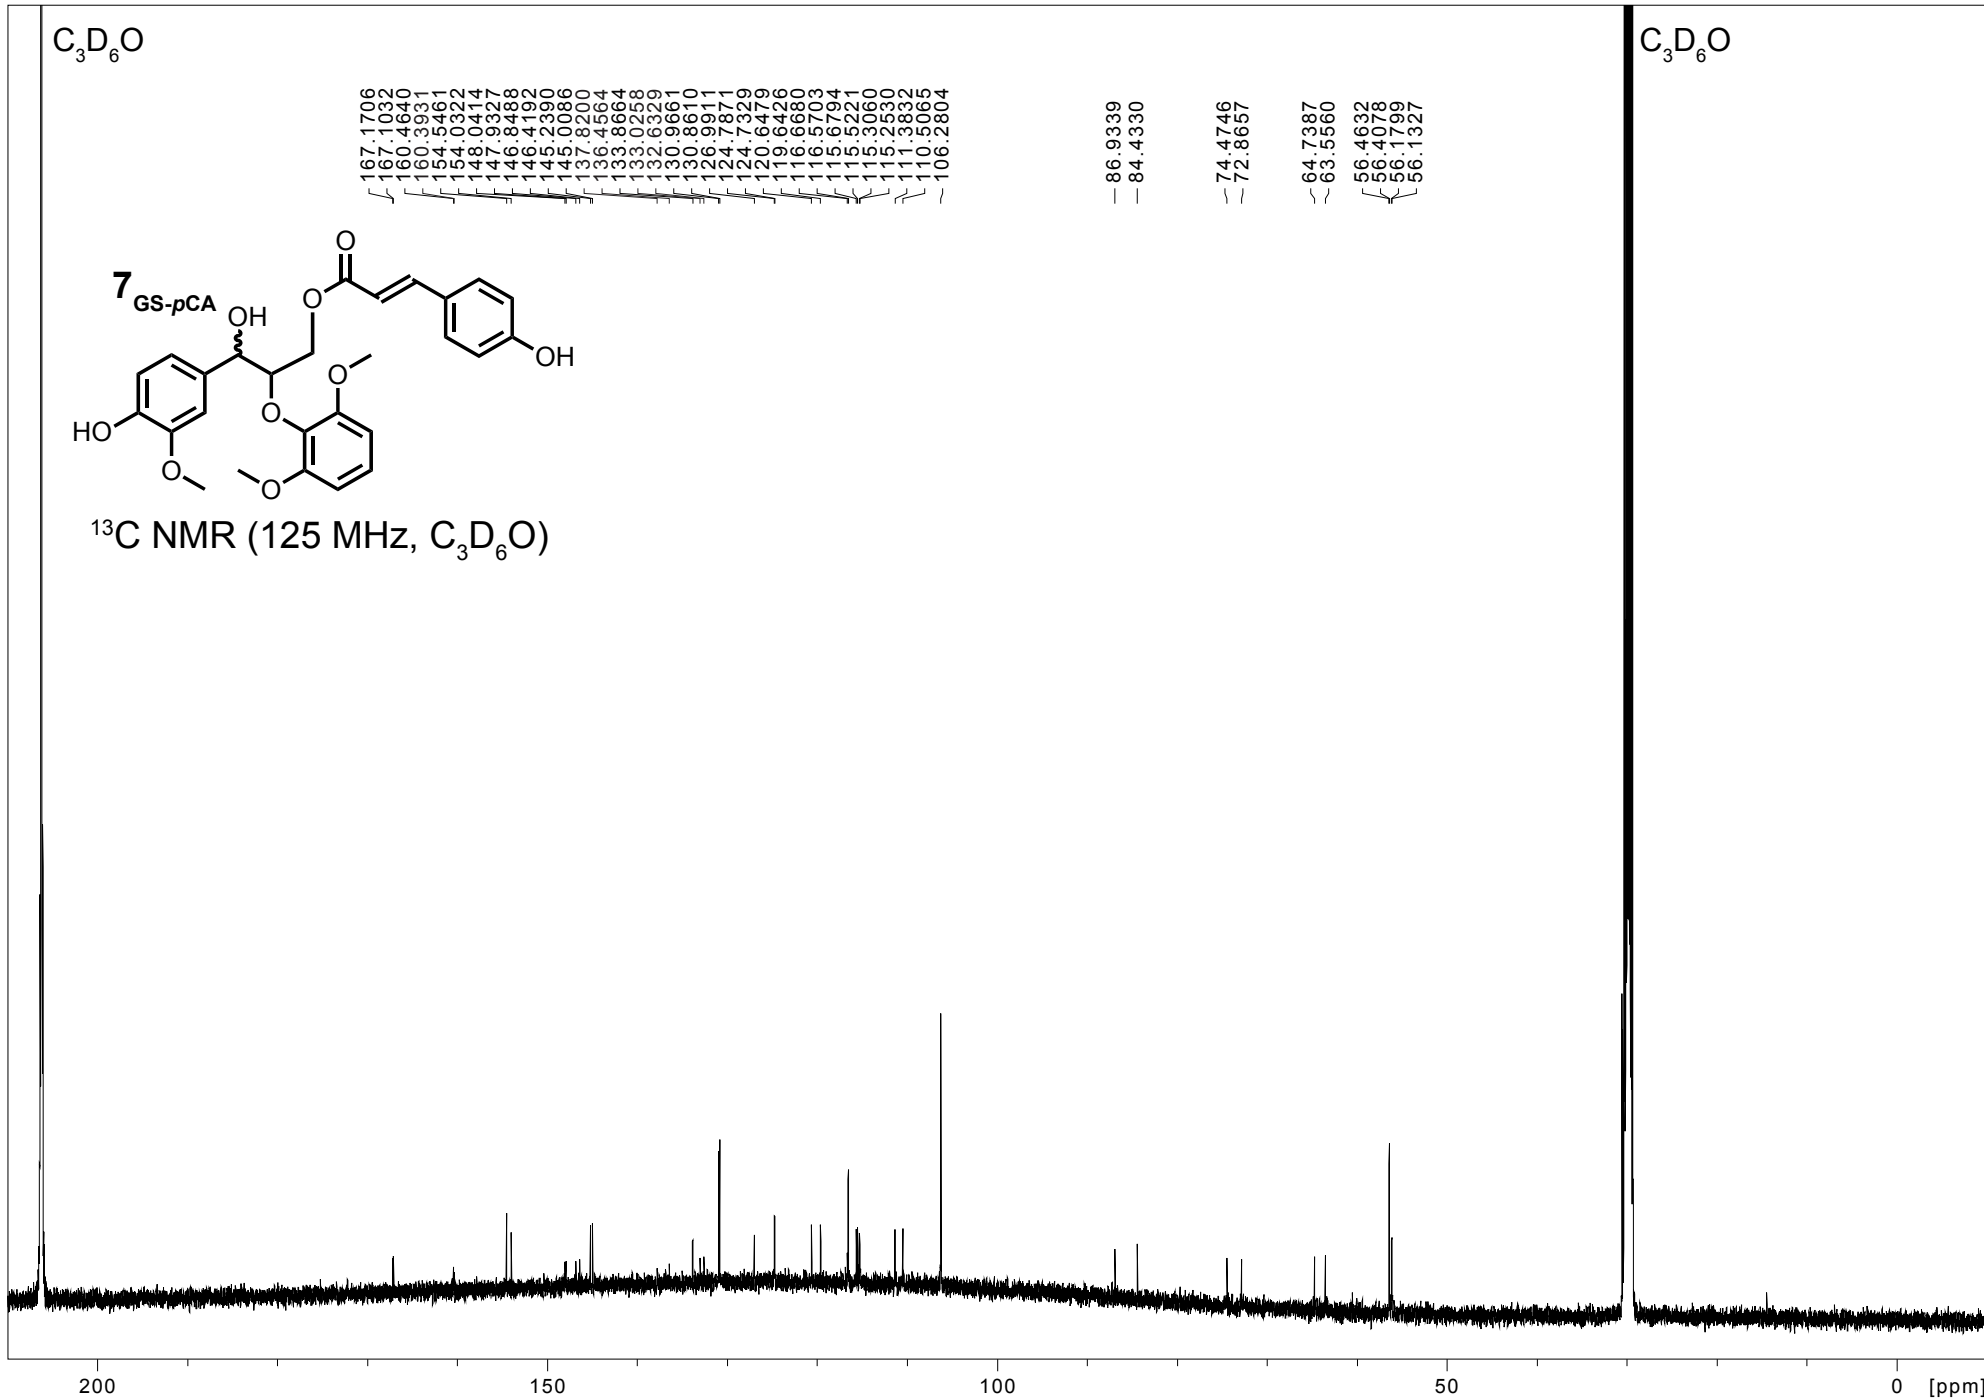

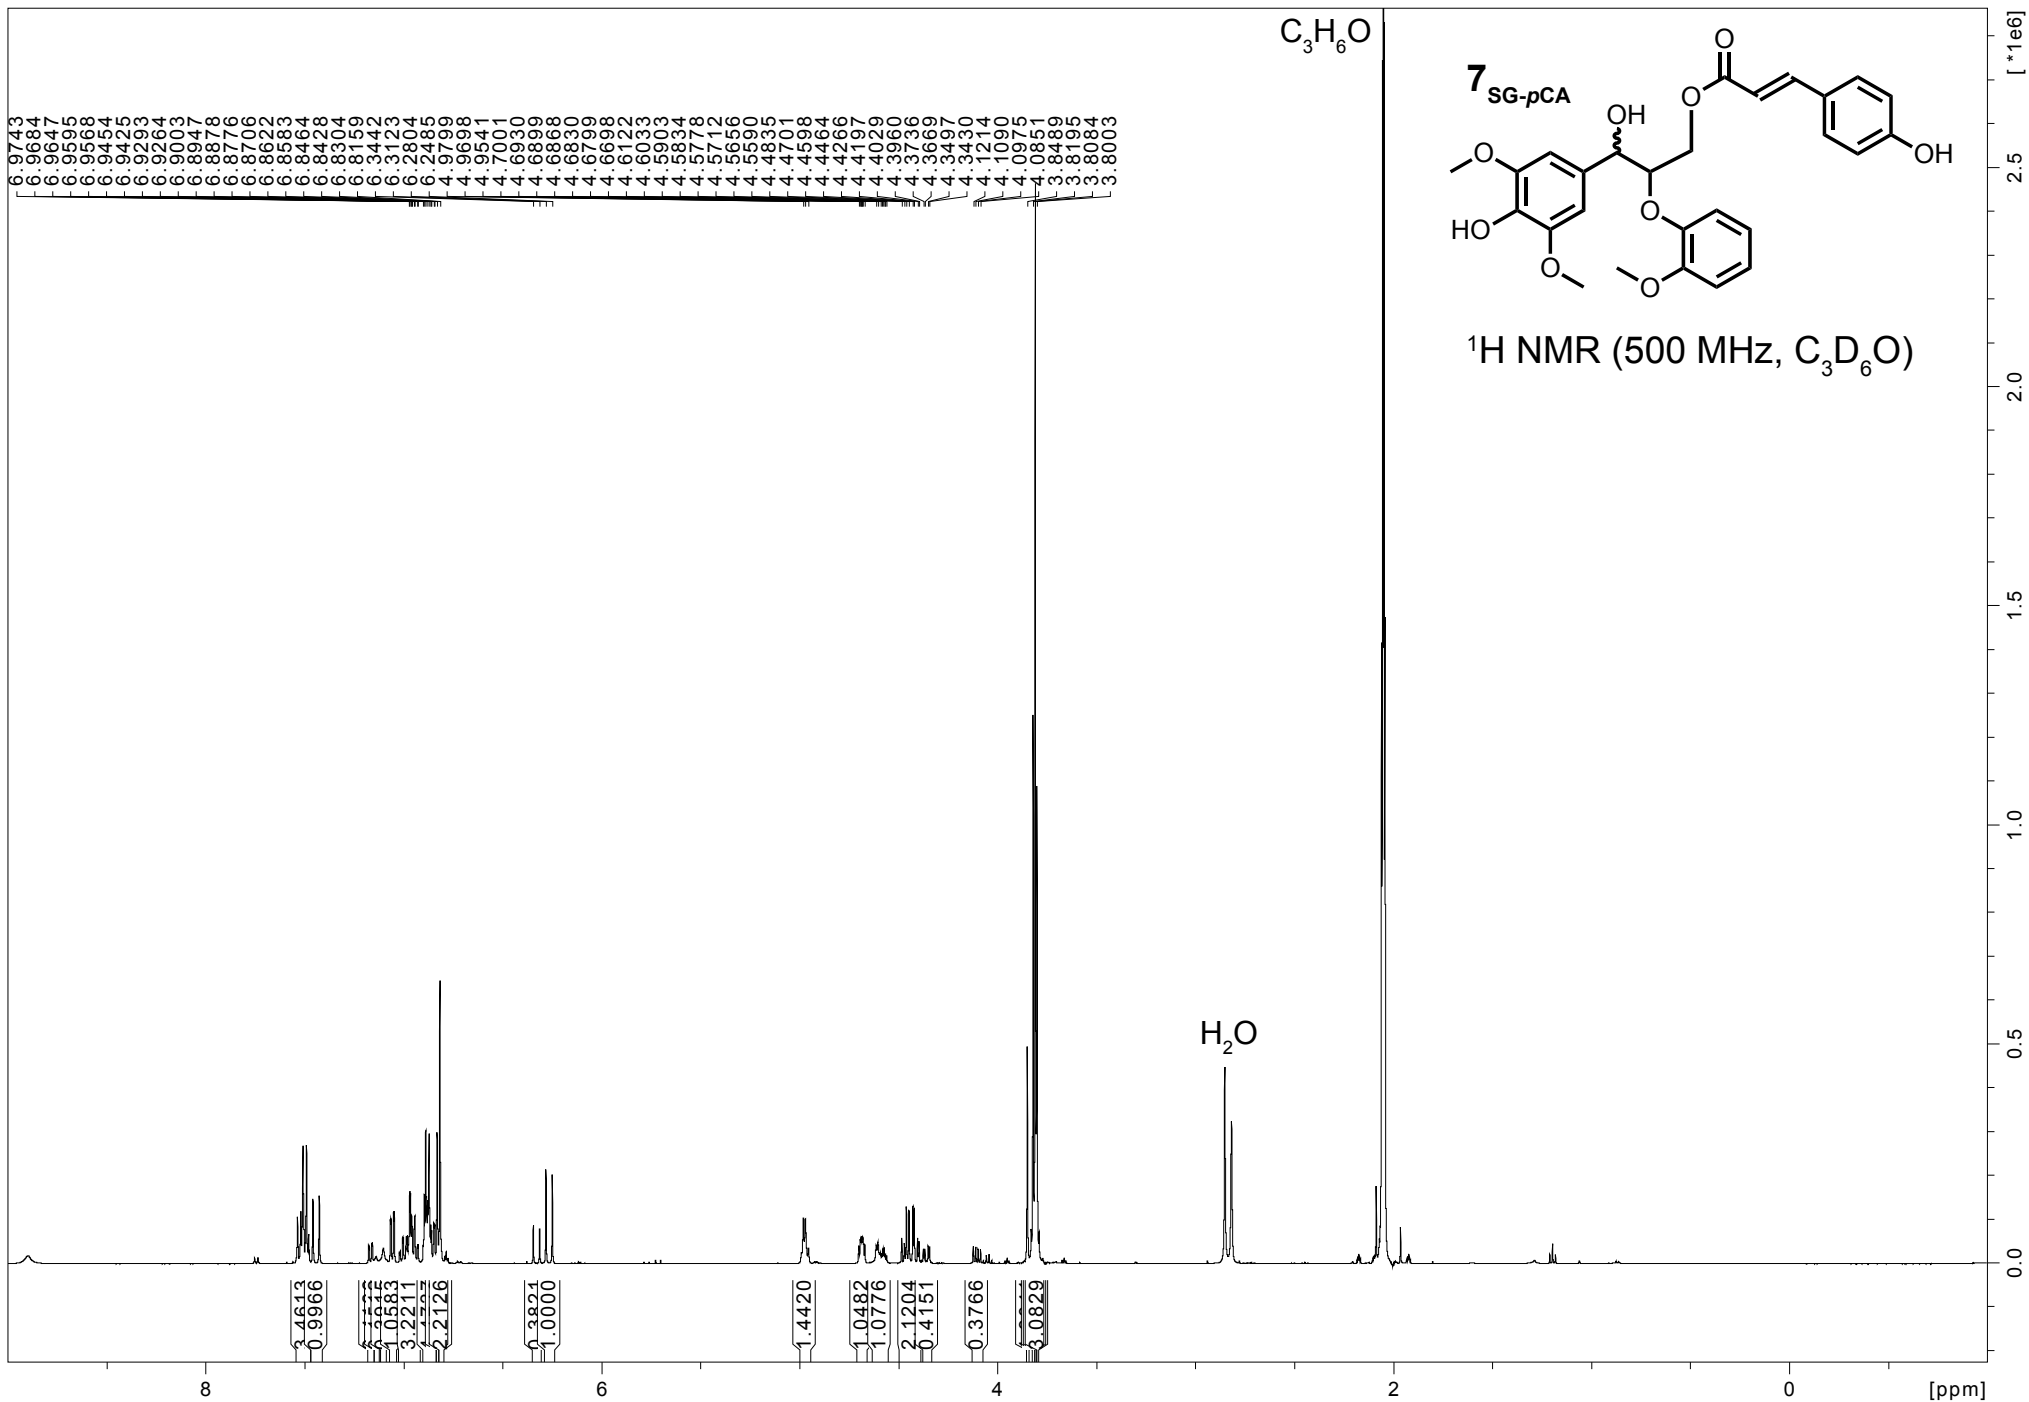



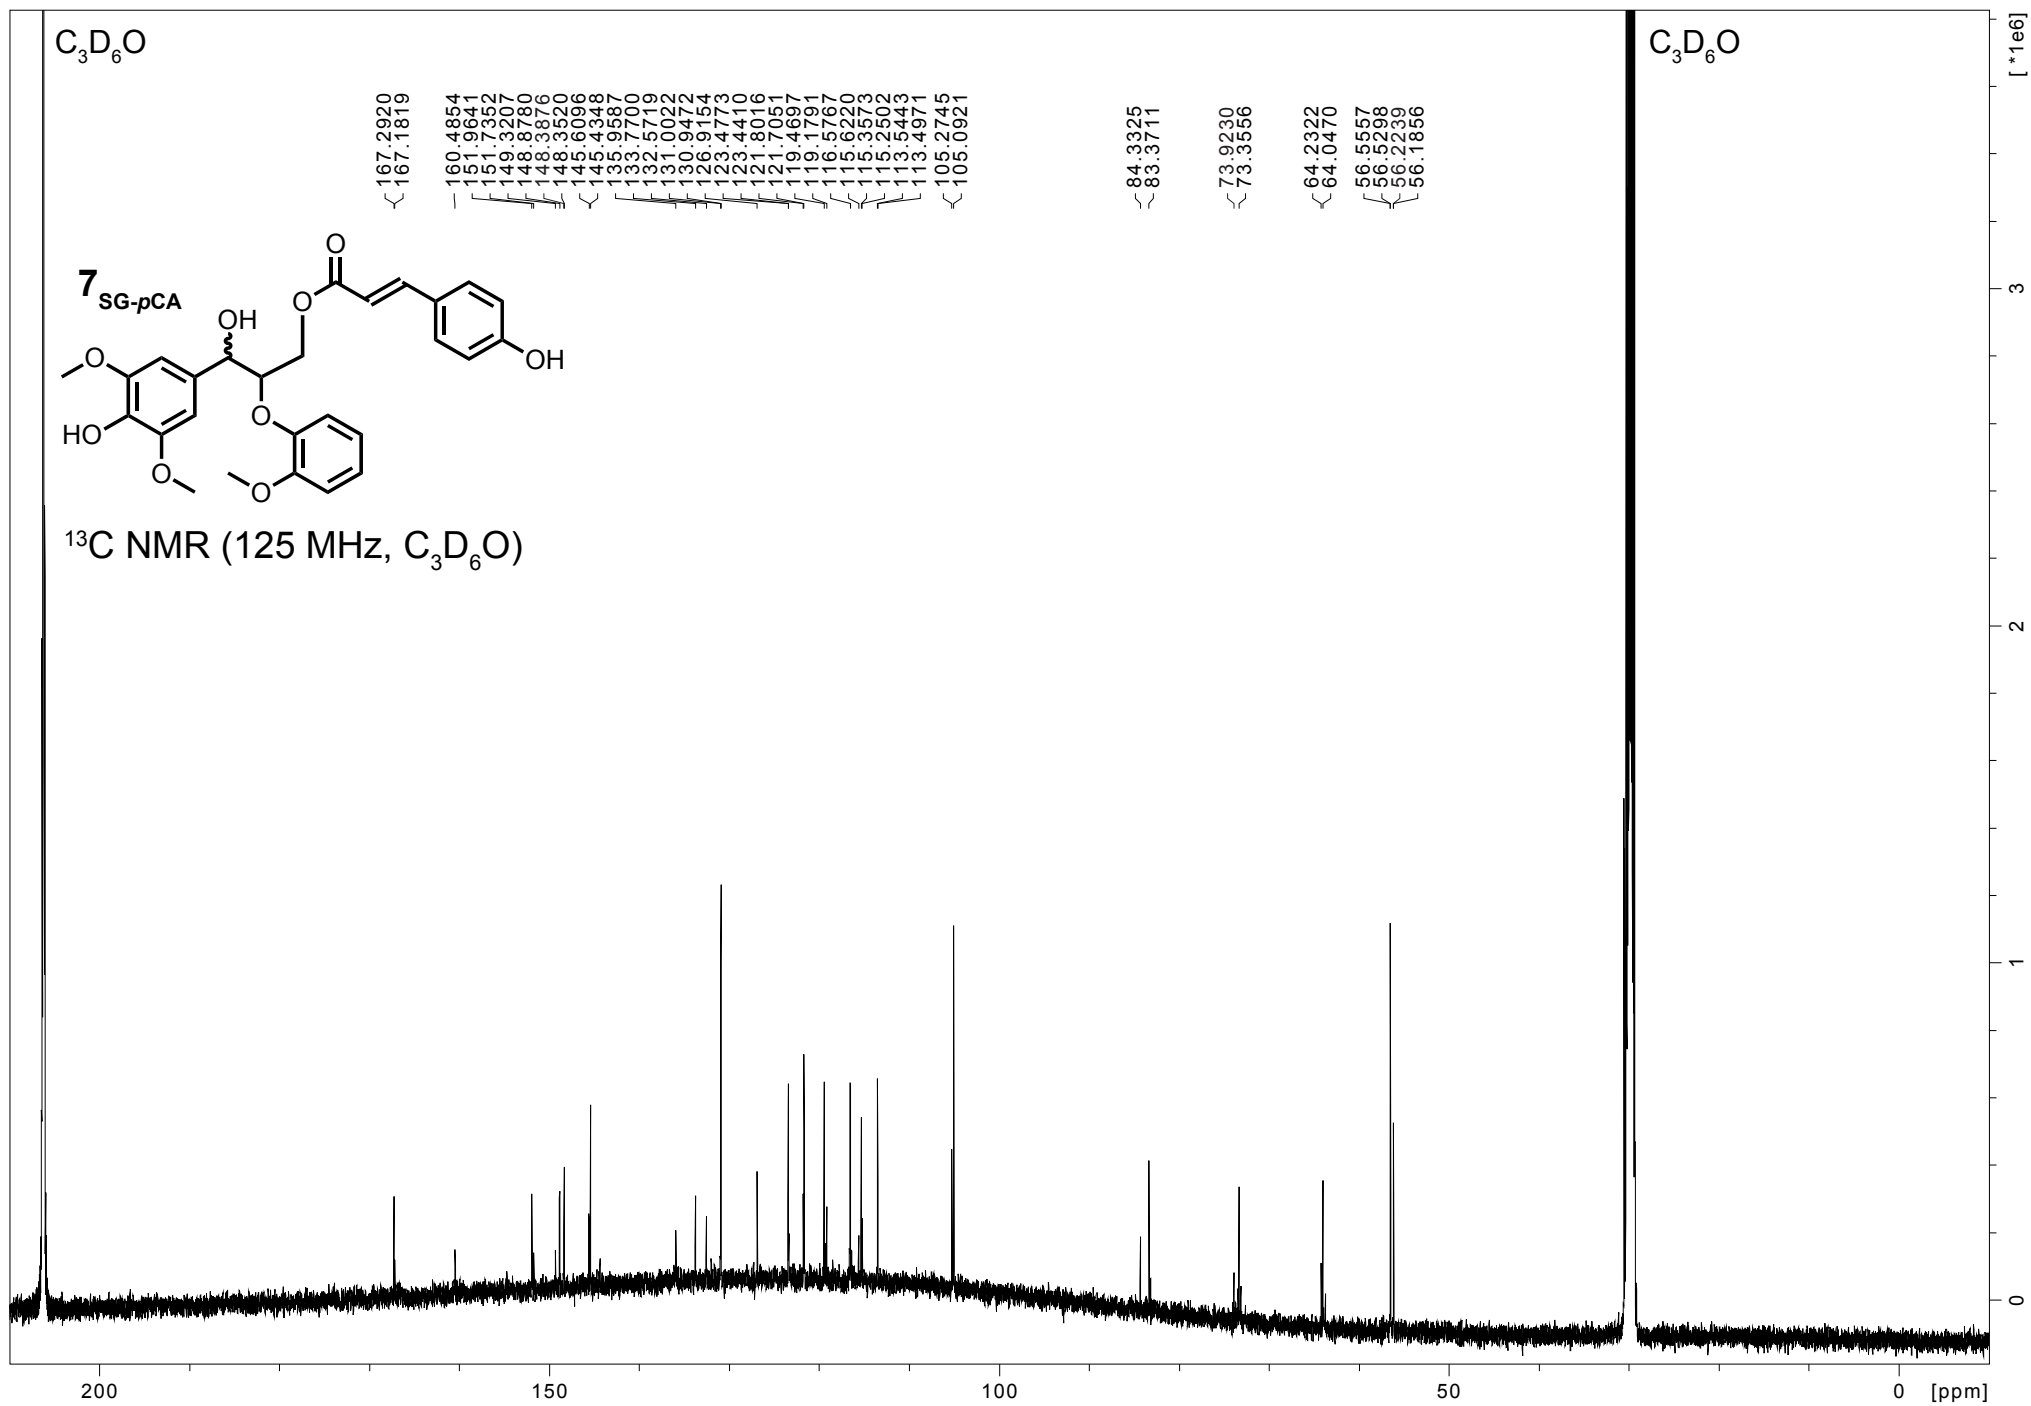

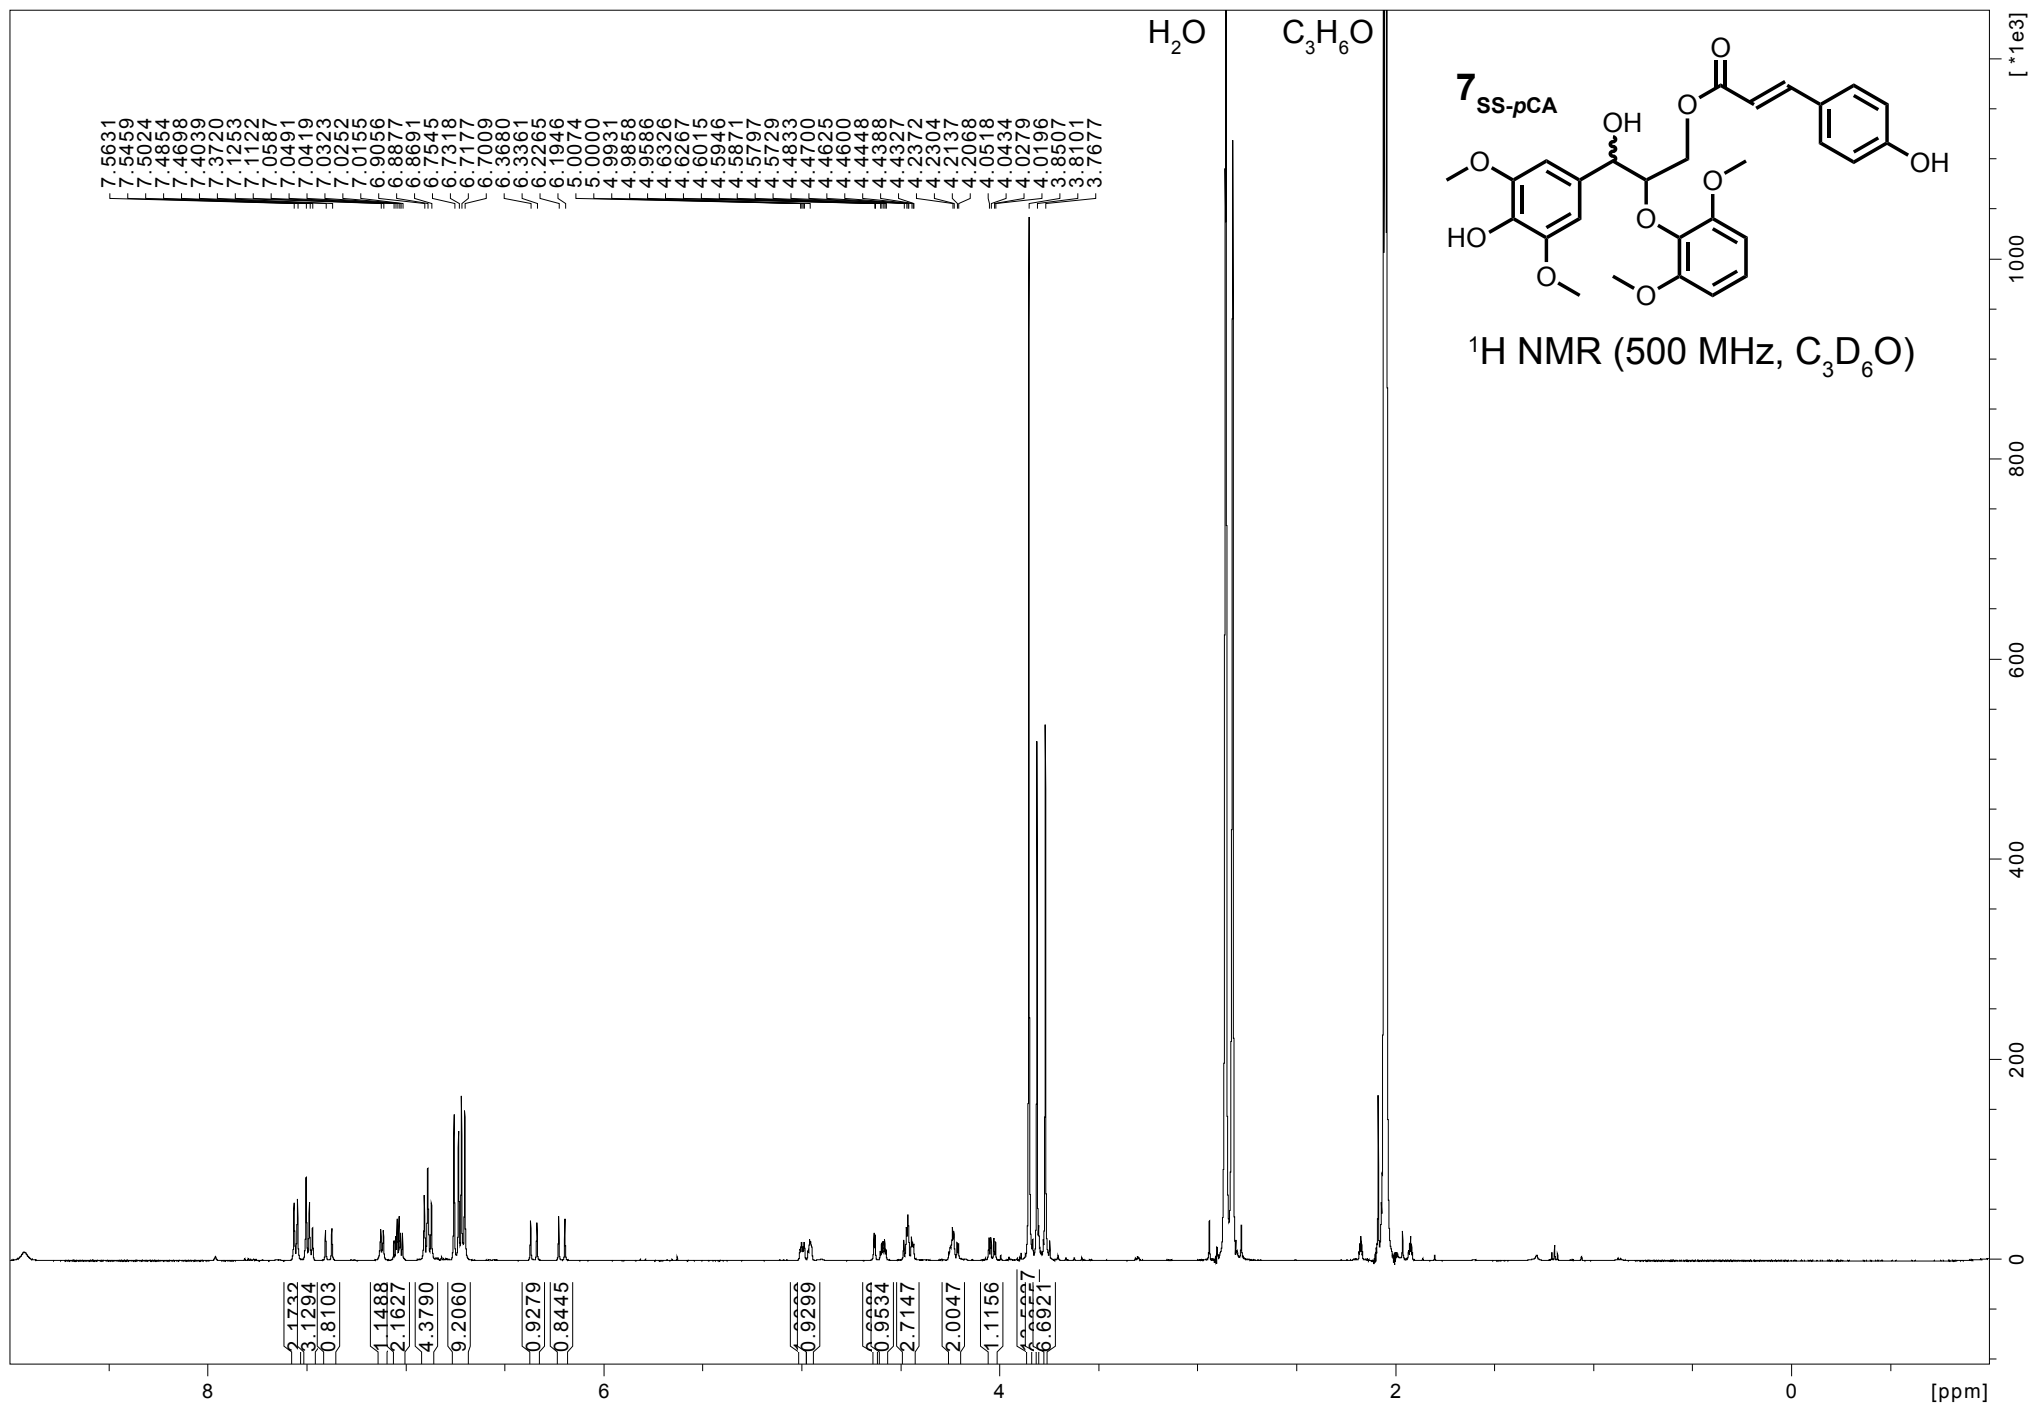

C<sub>3</sub>D<sub>6</sub>O

C<sub>3</sub>D<sub>6</sub>O

- 166.4131
- 166.2688
- 154.4964
- 154.0404
- 148.4020
- 148.3420
- 145.3063
- 145.0260
- 137.7830
- 136.4767
- 136.2746
- 136.1659
- 135.9116
- 132.5076
- 132.4815
- 131.8809
- 130.9719
- 130.8616
- 124.7324
- 116.5890
- 115.9825
- 115.9015
- 115.7118
- 106.3236
- 106.2173
- 105.2060
- 104.4508
- 86.9935
- 84.5340
- 75.0315
- 74.9264
- 73.2478
- 73.1313
- 65.0673
- 63.7994
- 56.5469
- 56.4236
- 56.3901
- 56.3550

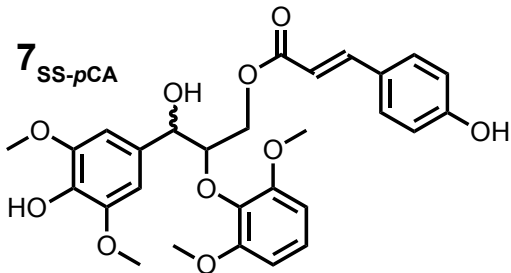

<sup>13</sup>C NMR (125 MHz, C<sub>3</sub>D<sub>6</sub>O)

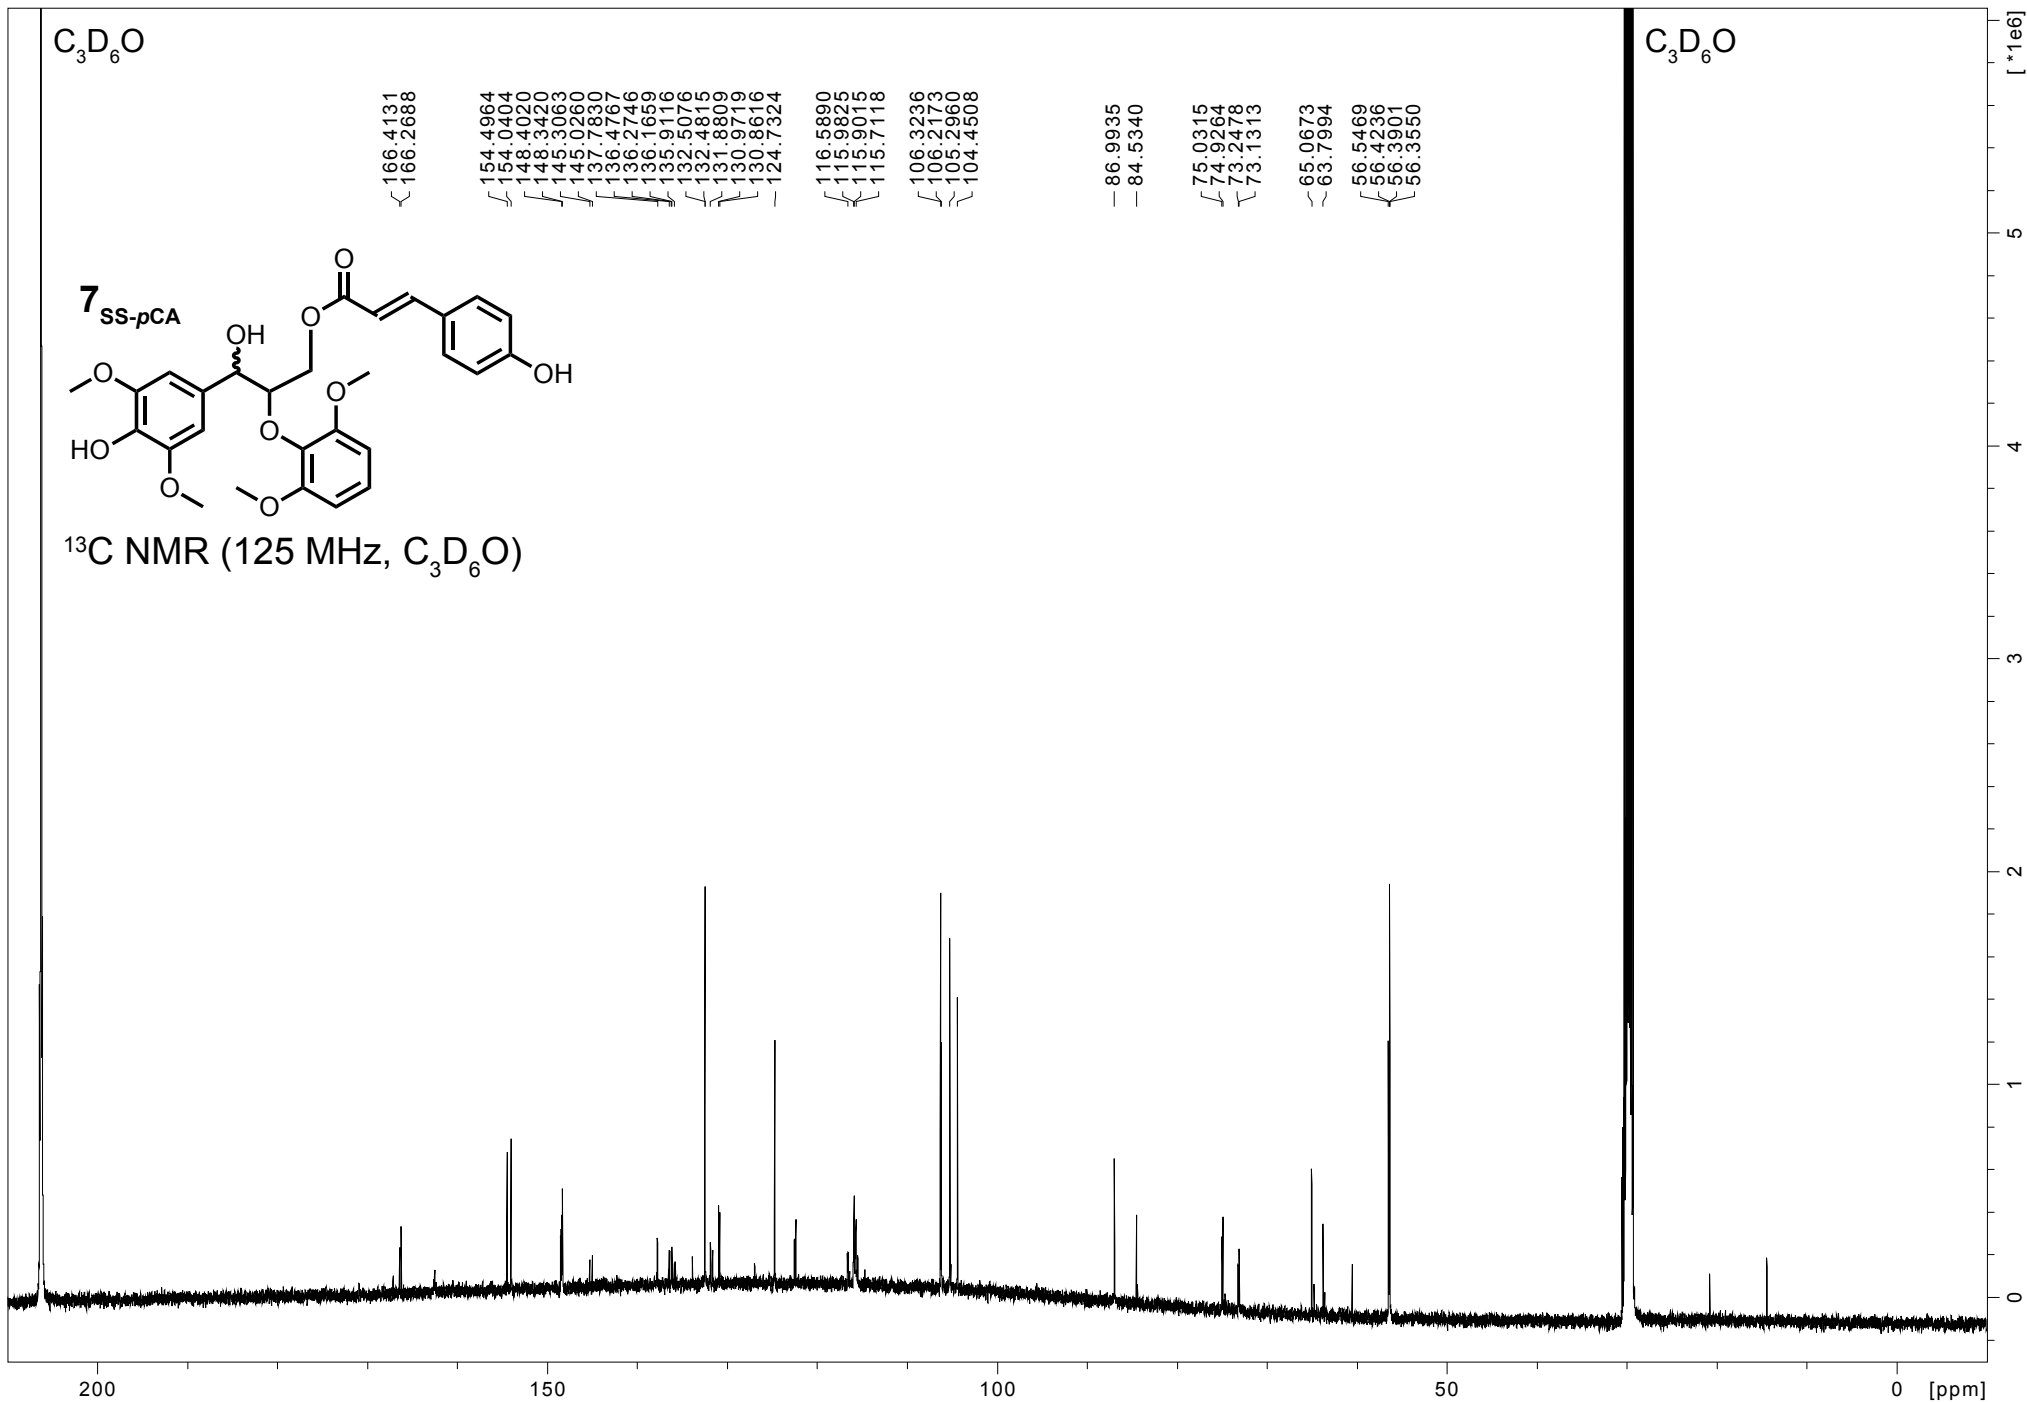

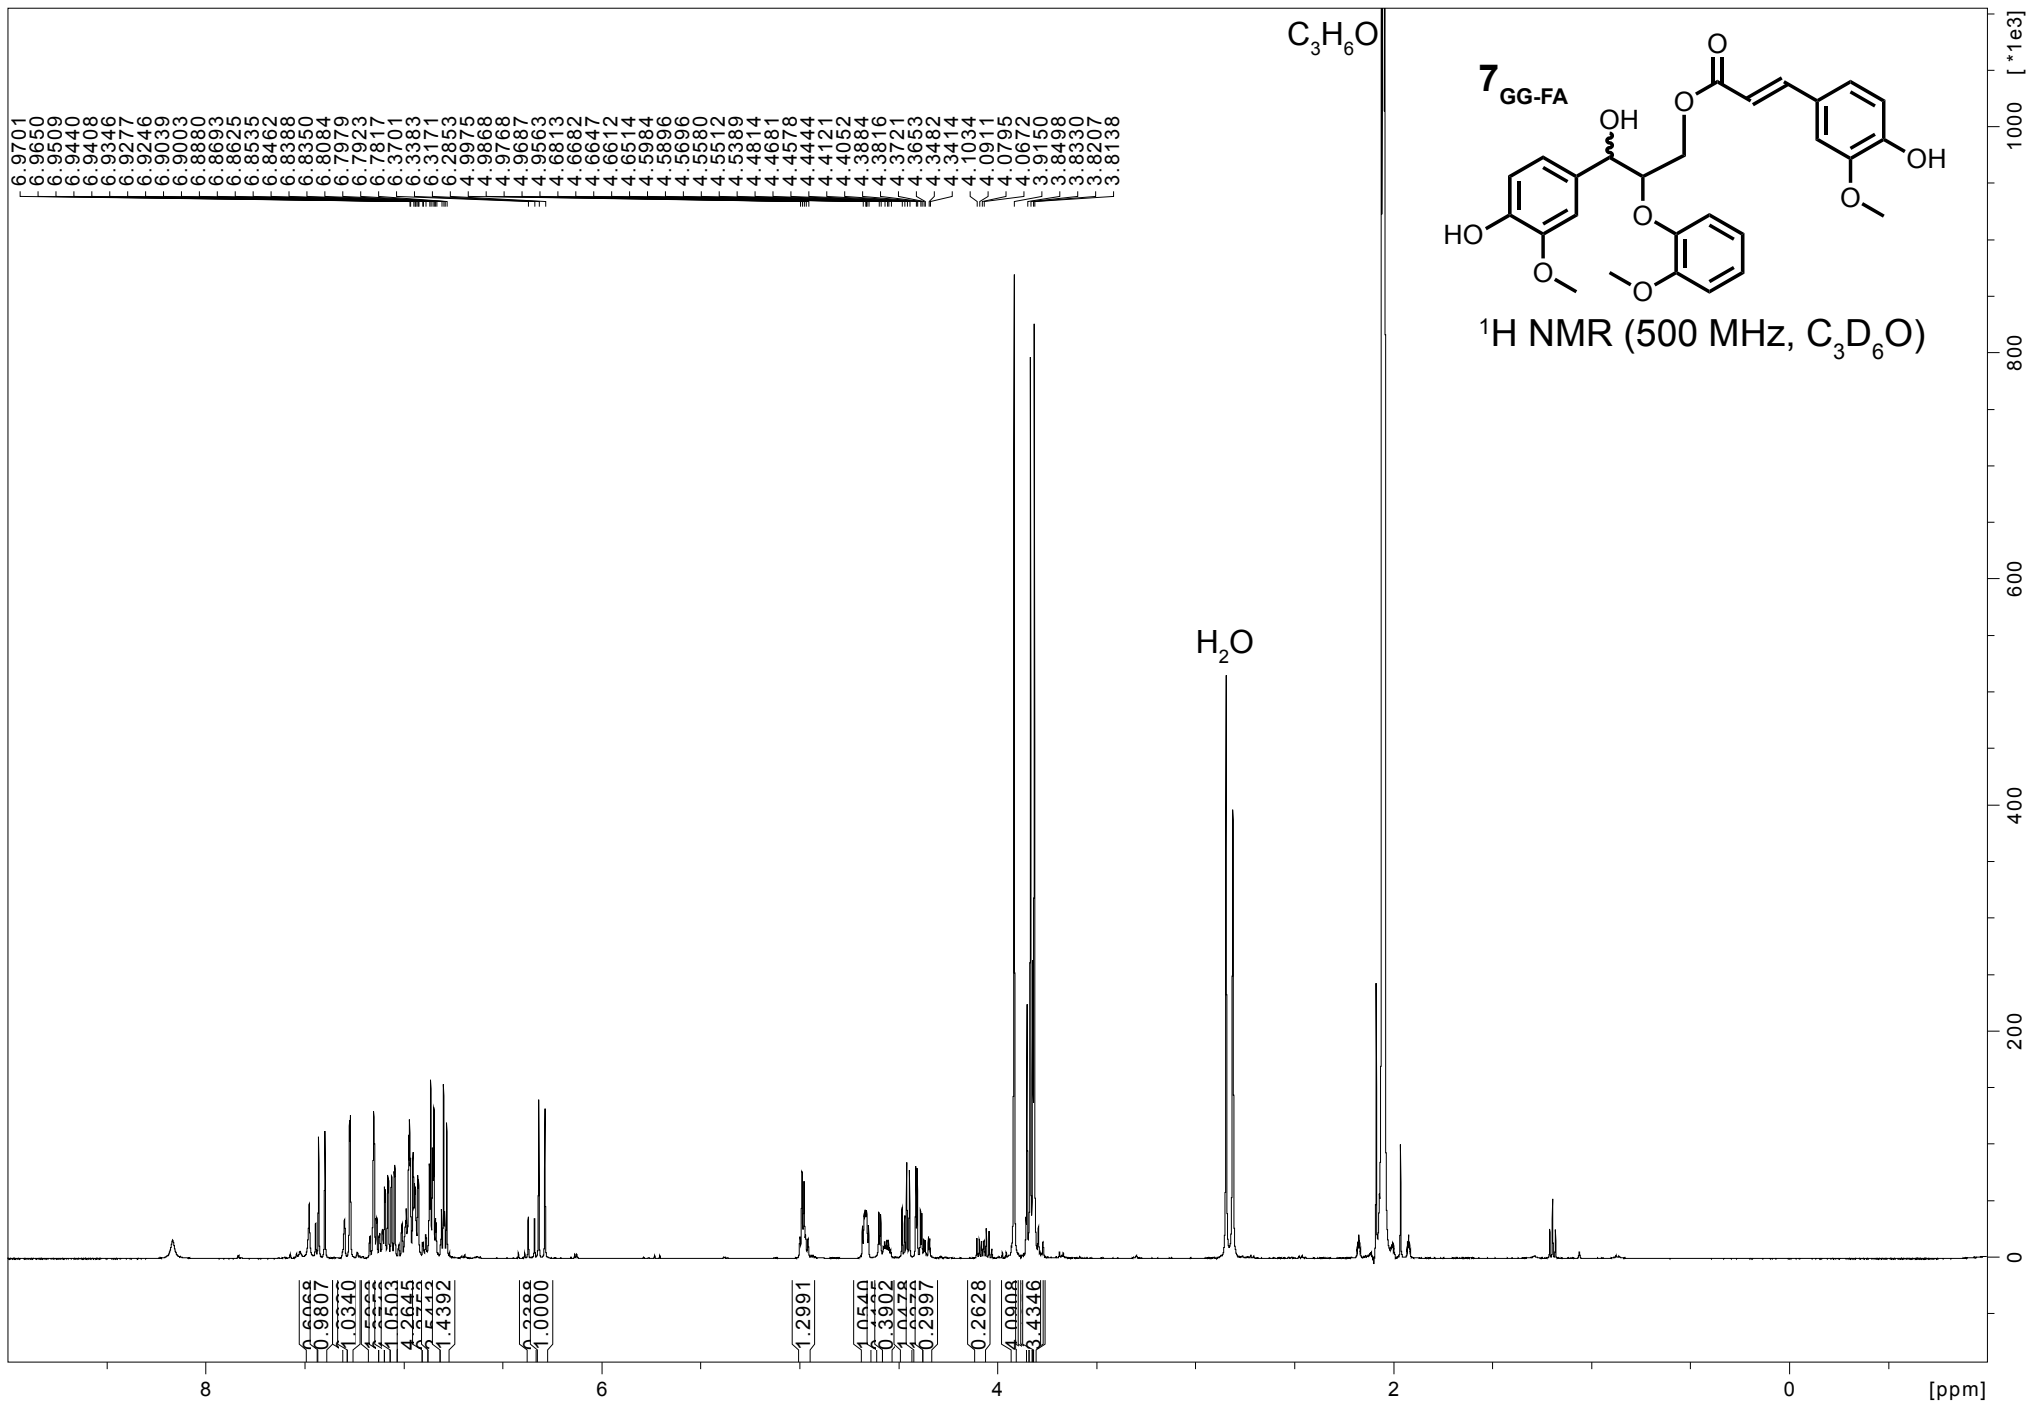

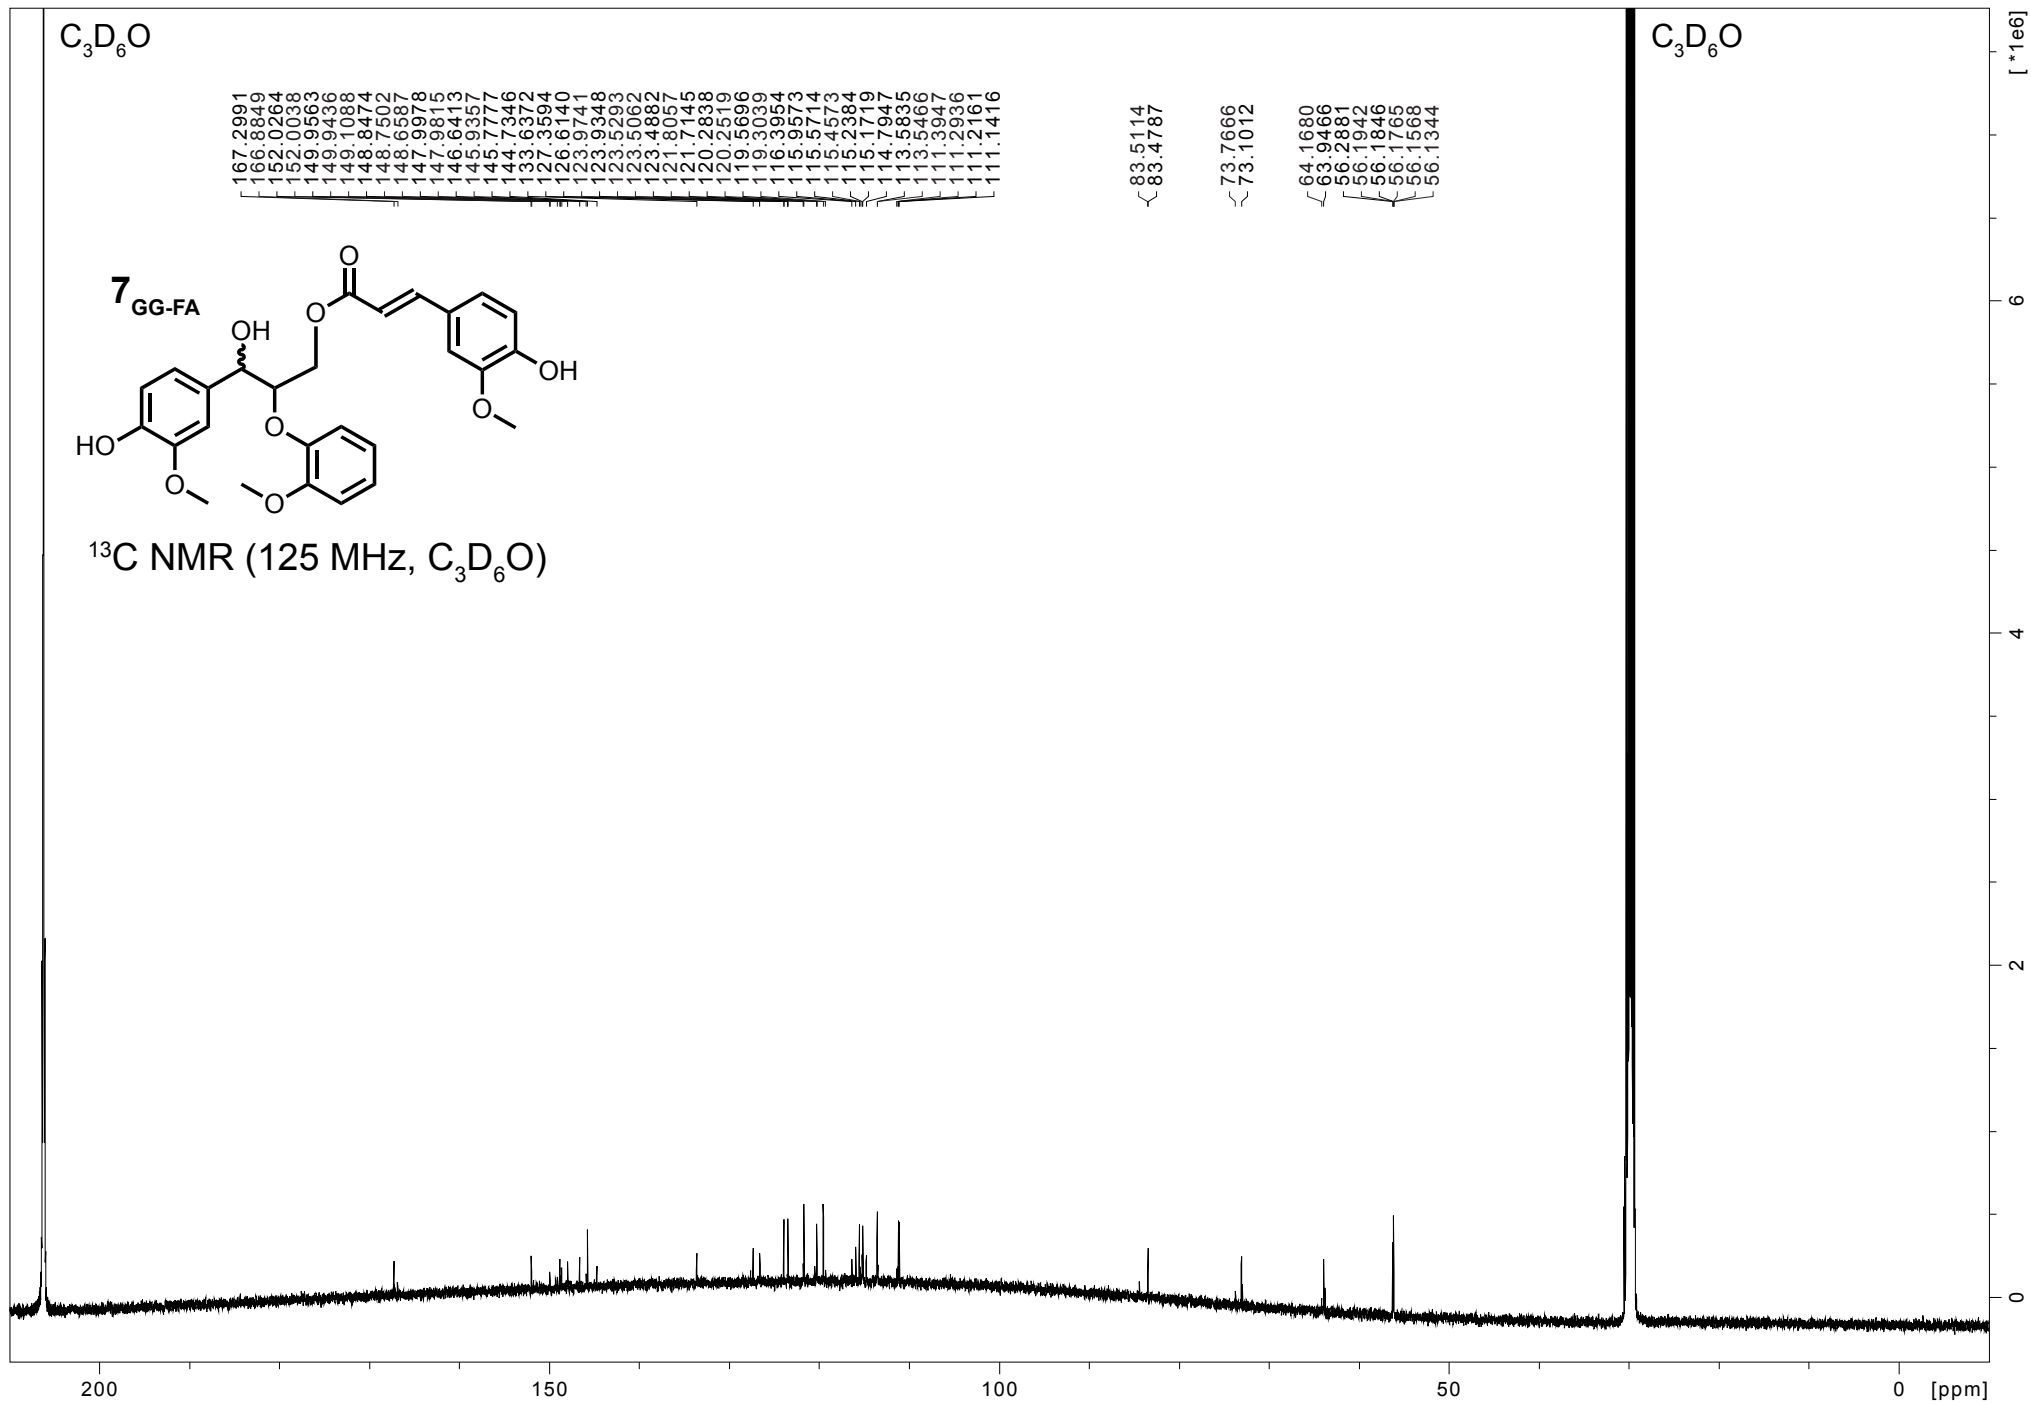

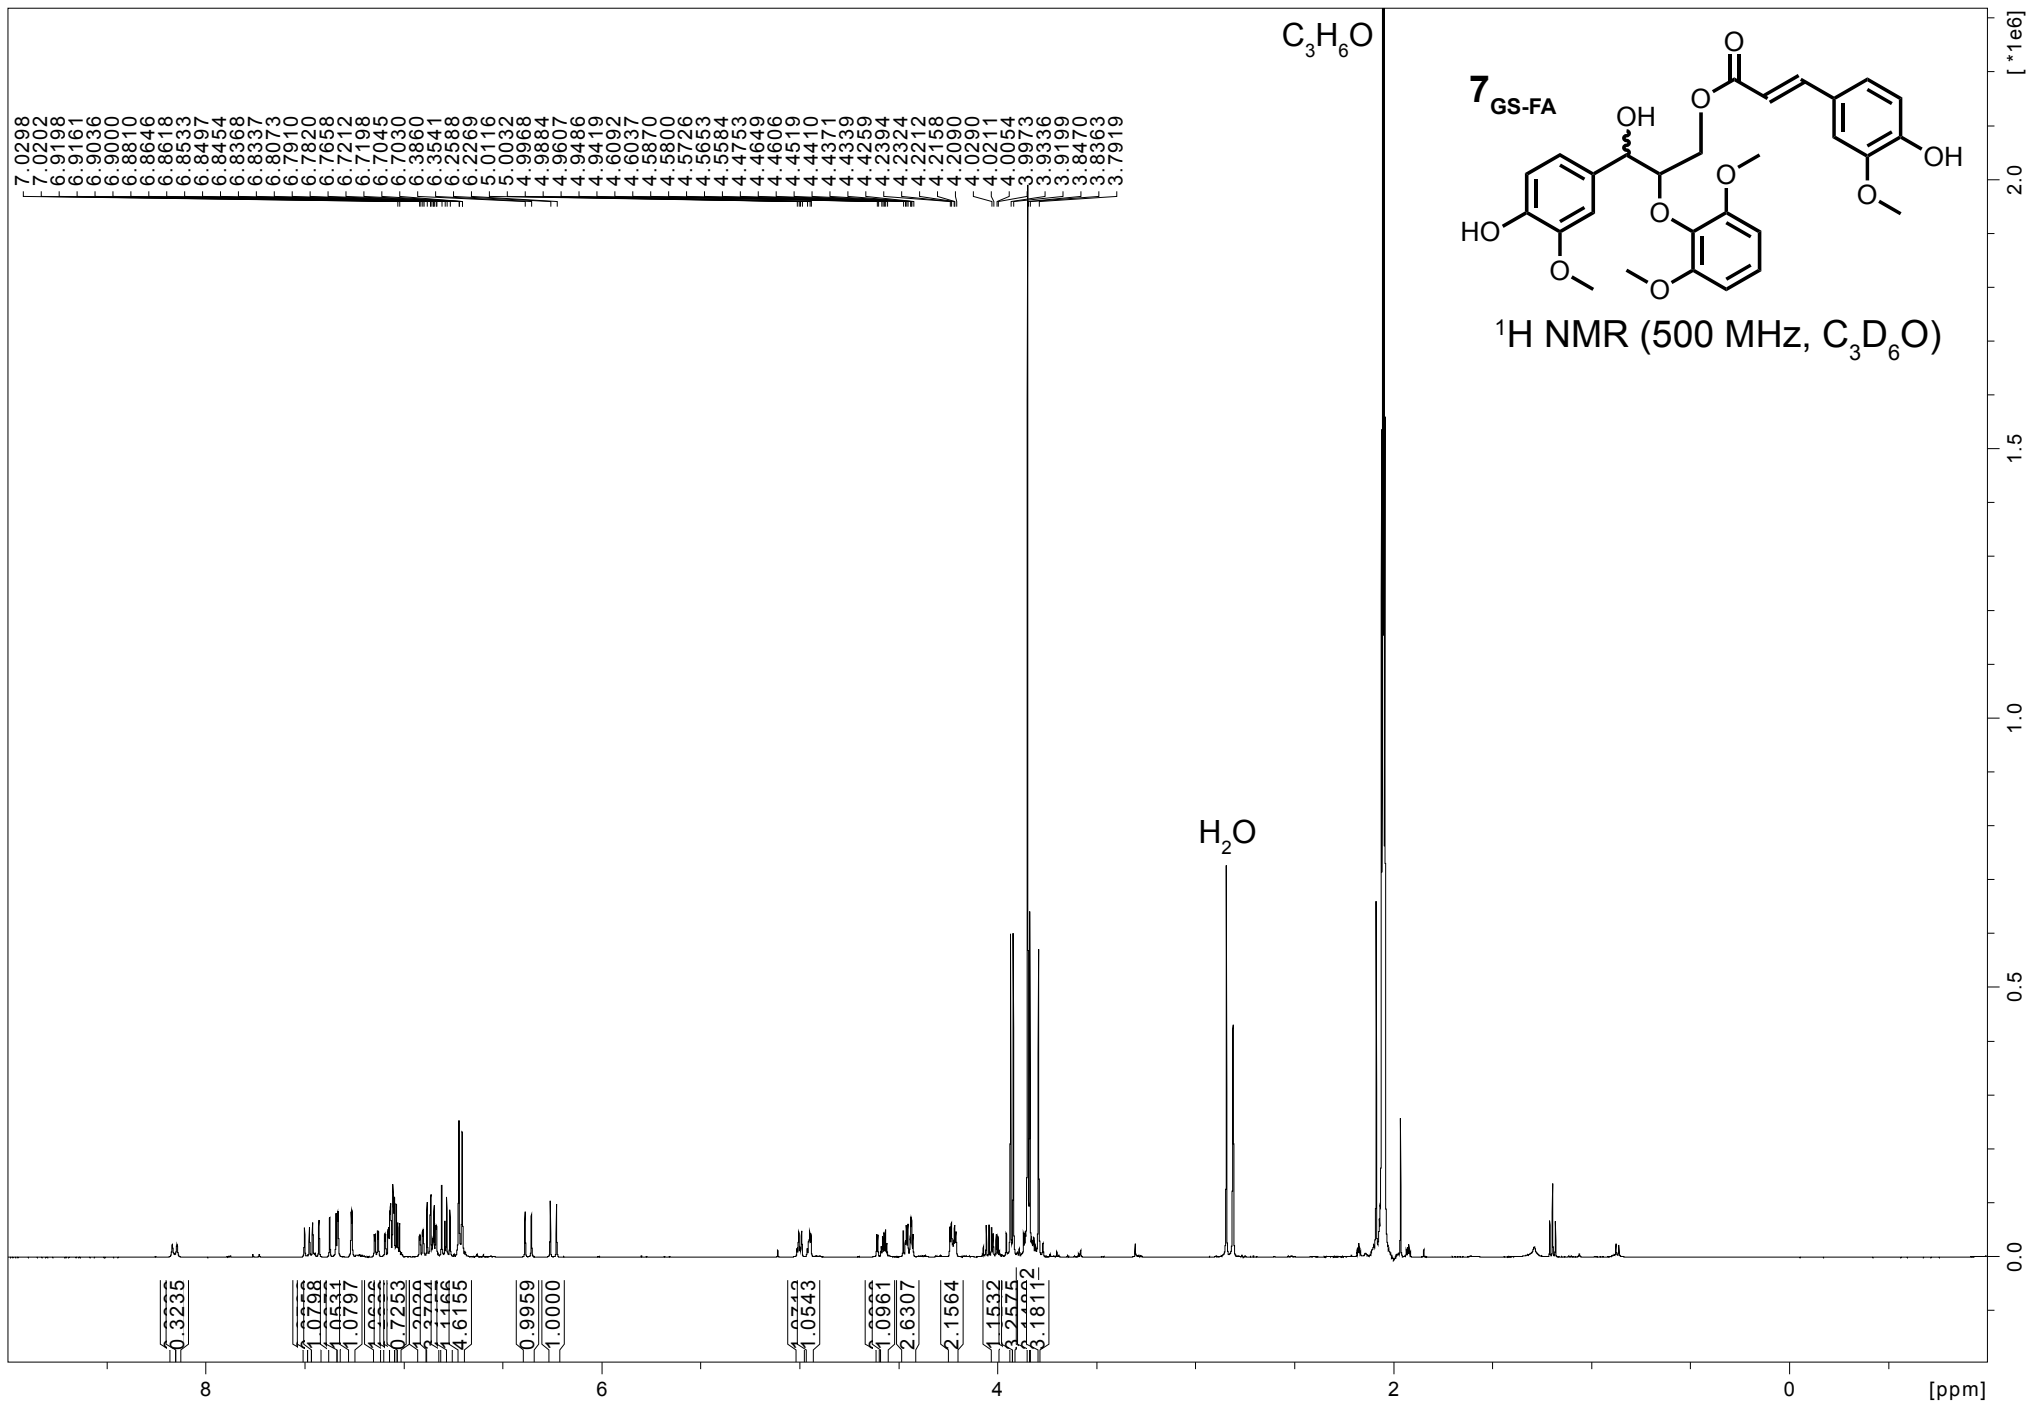

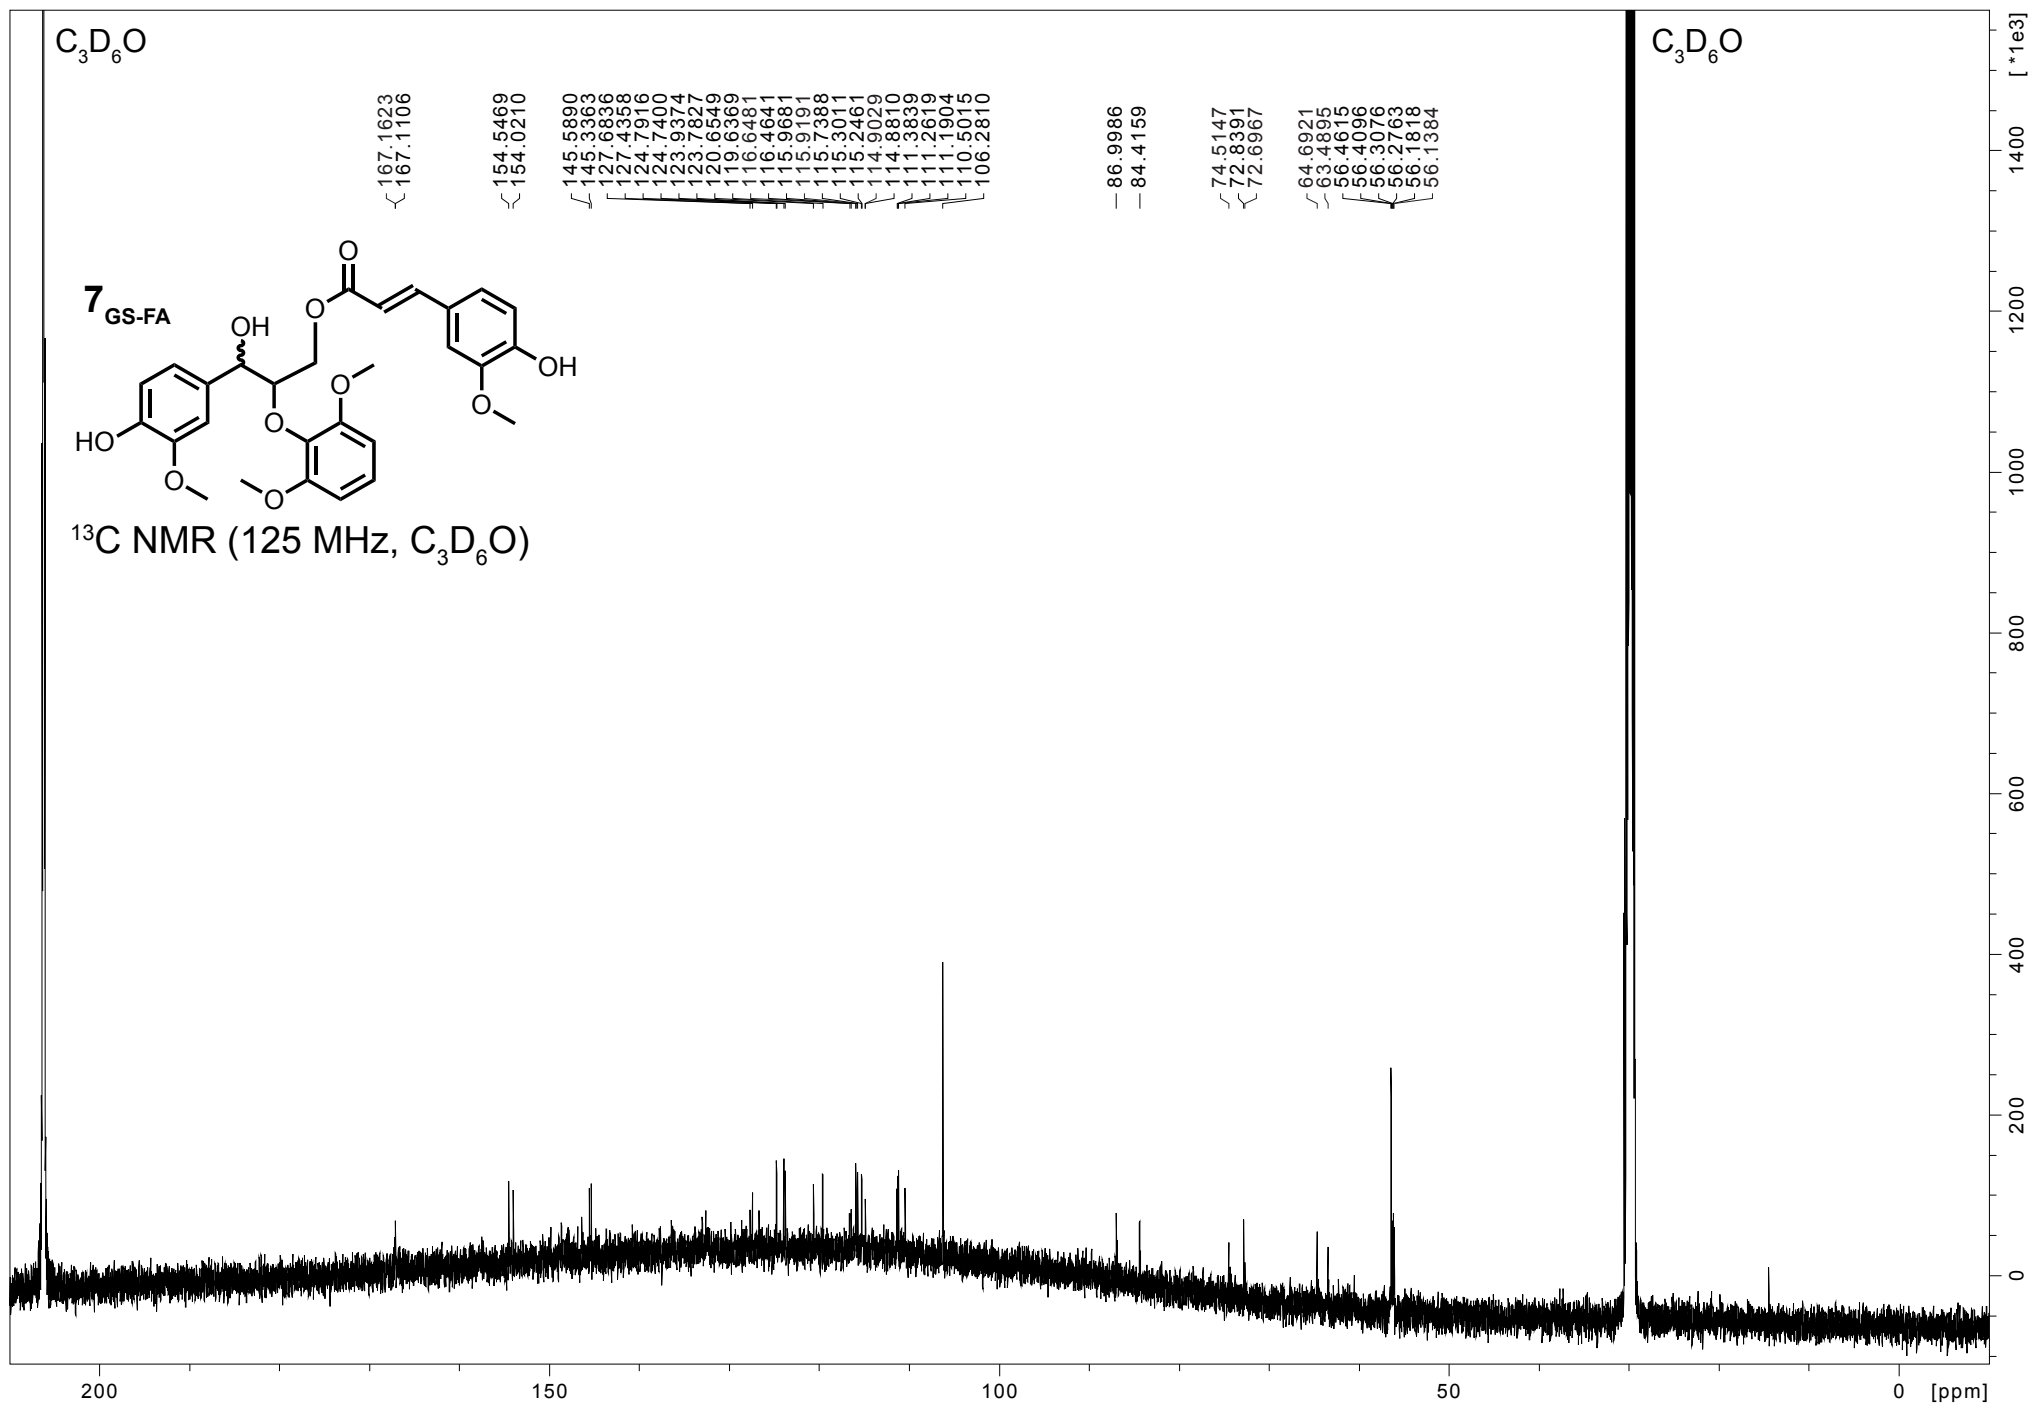

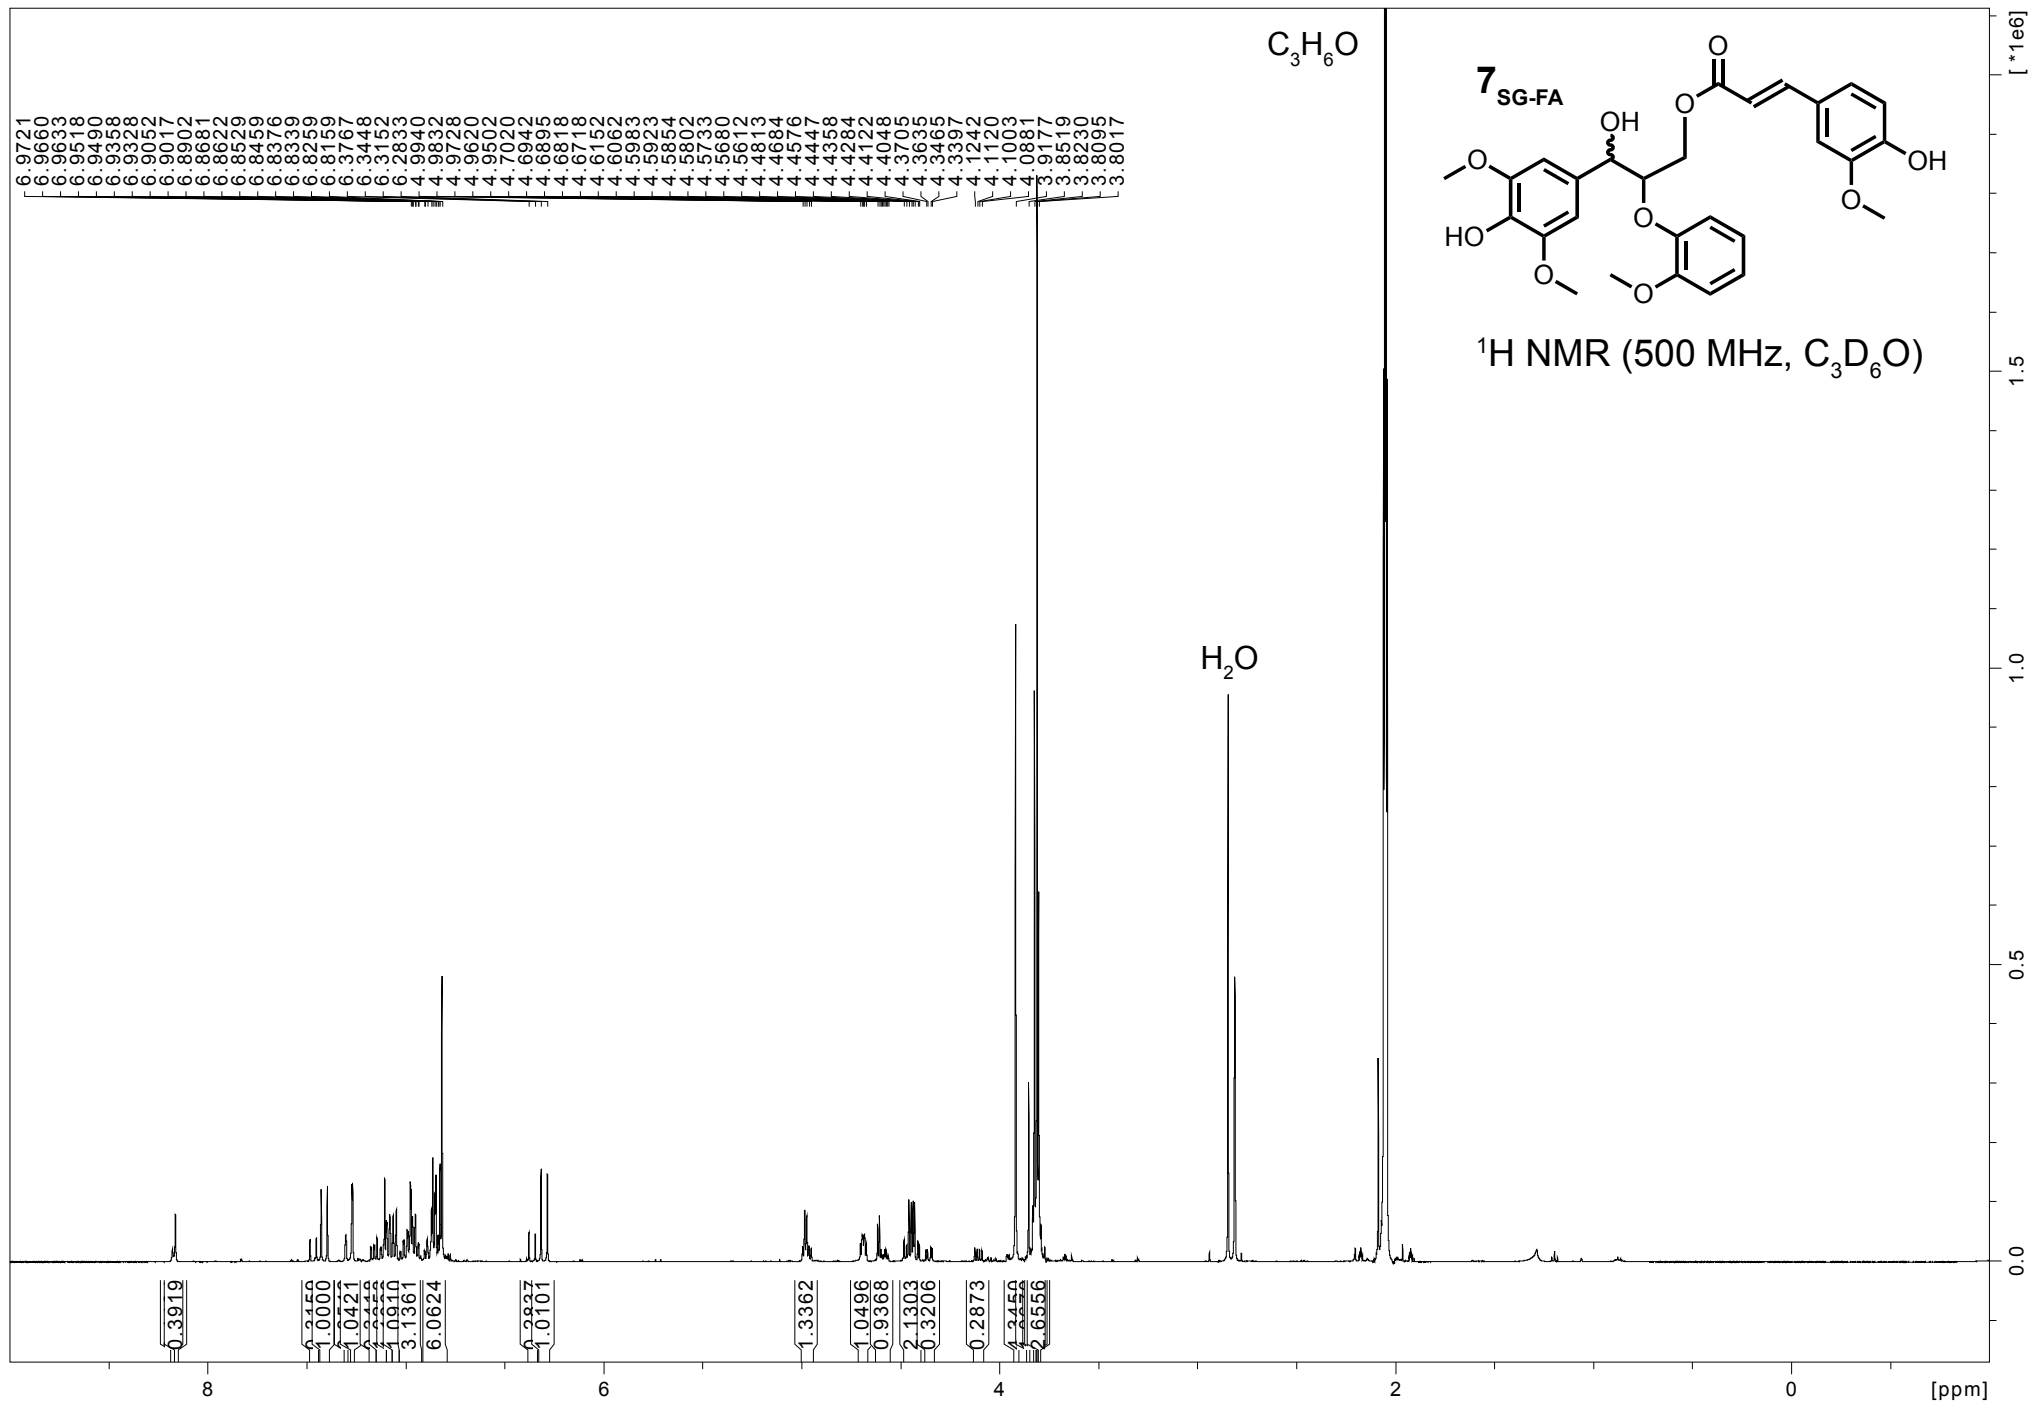



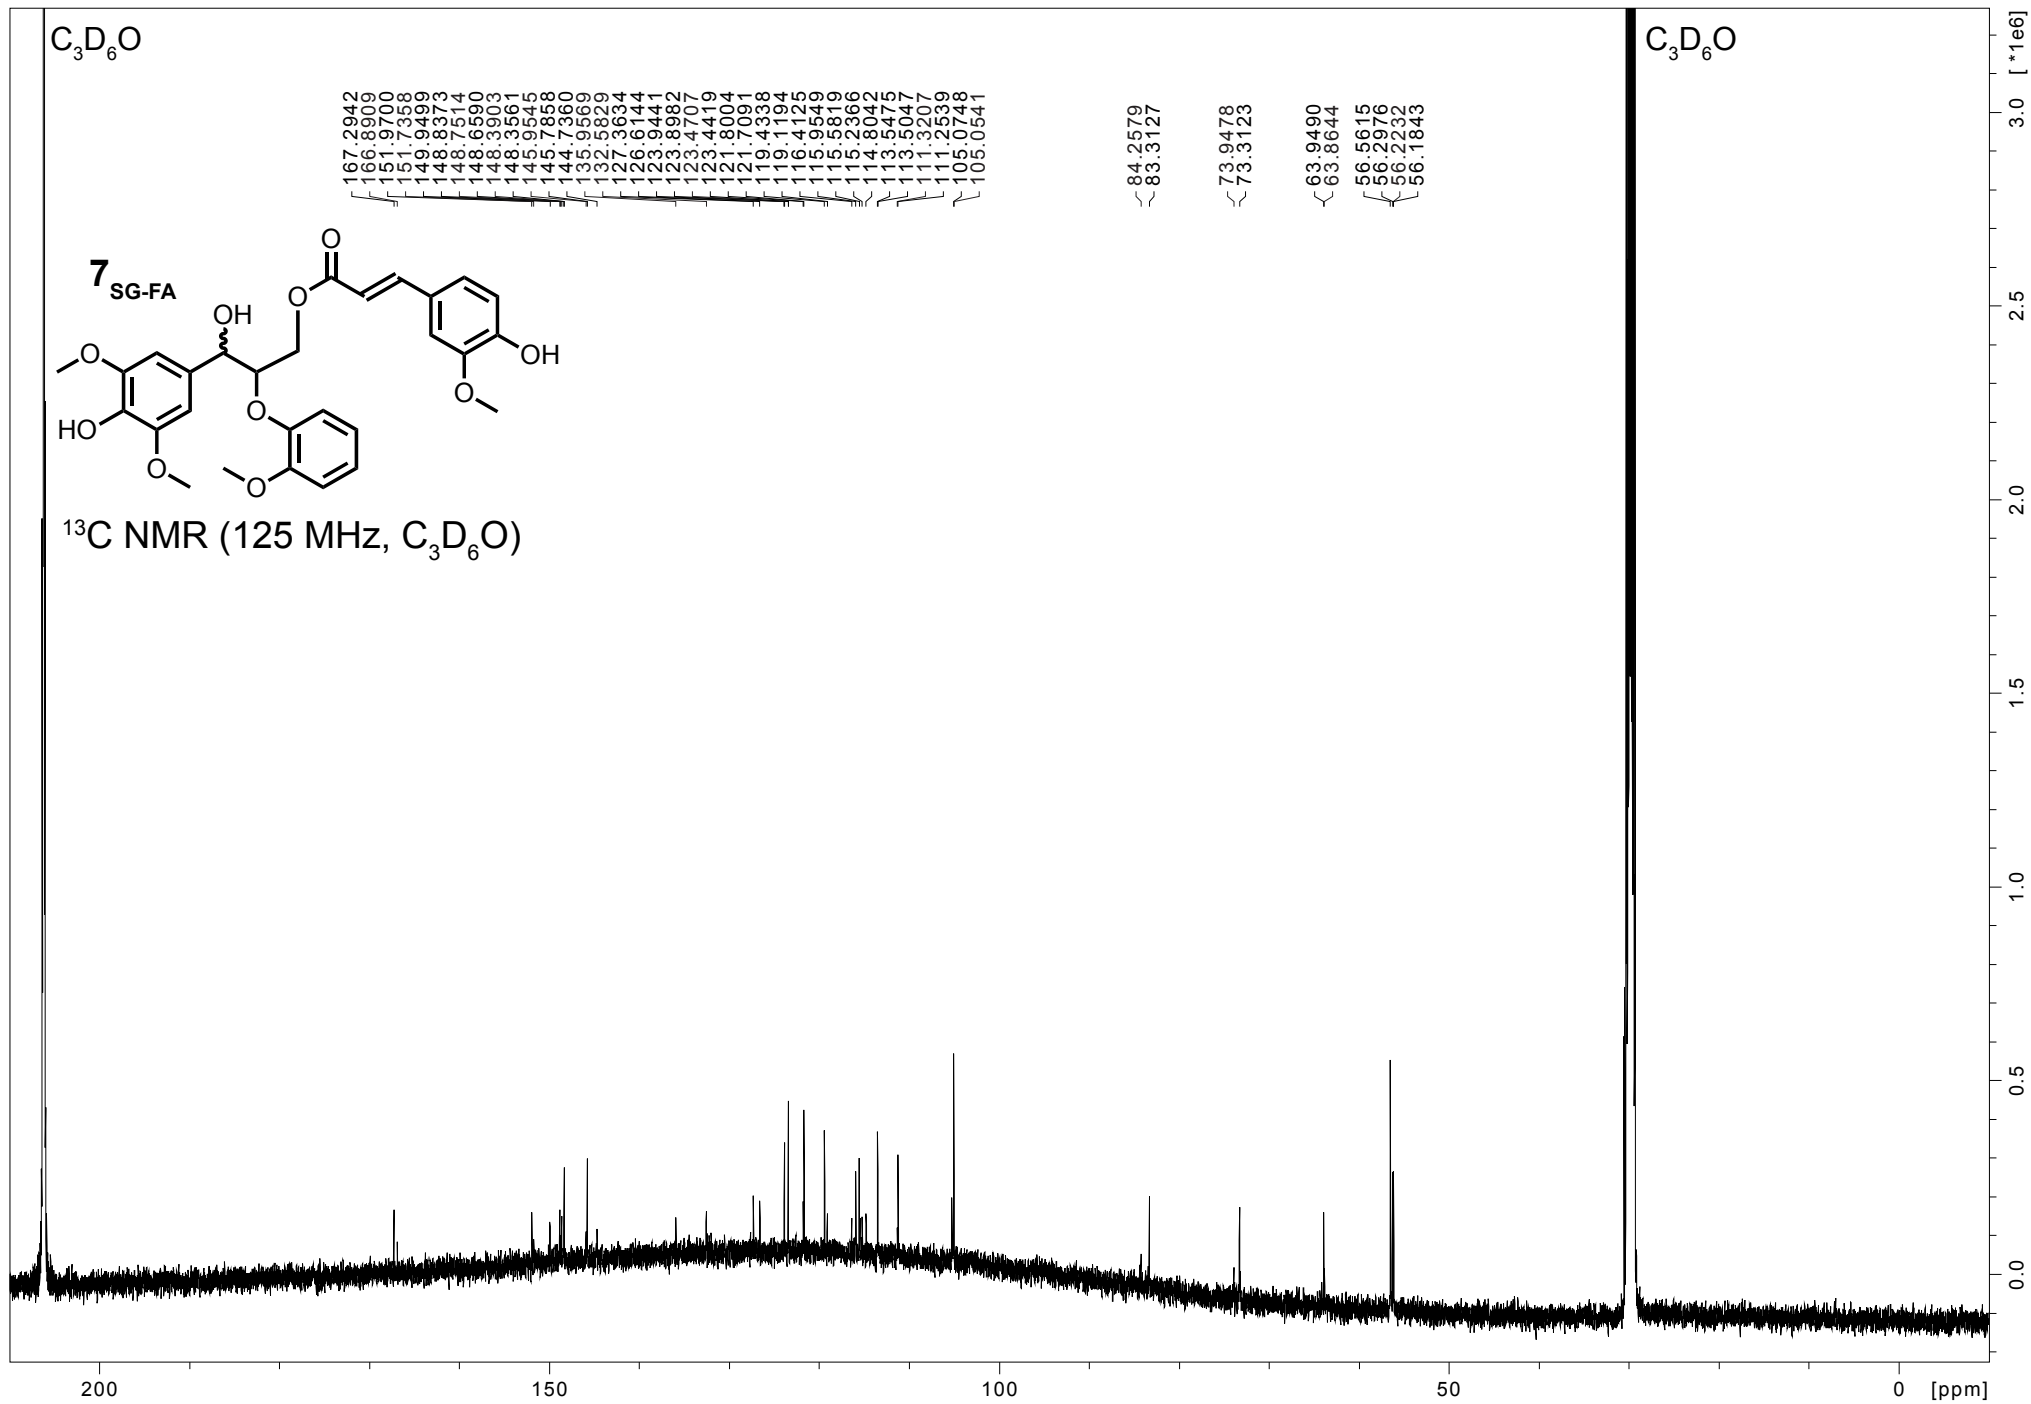

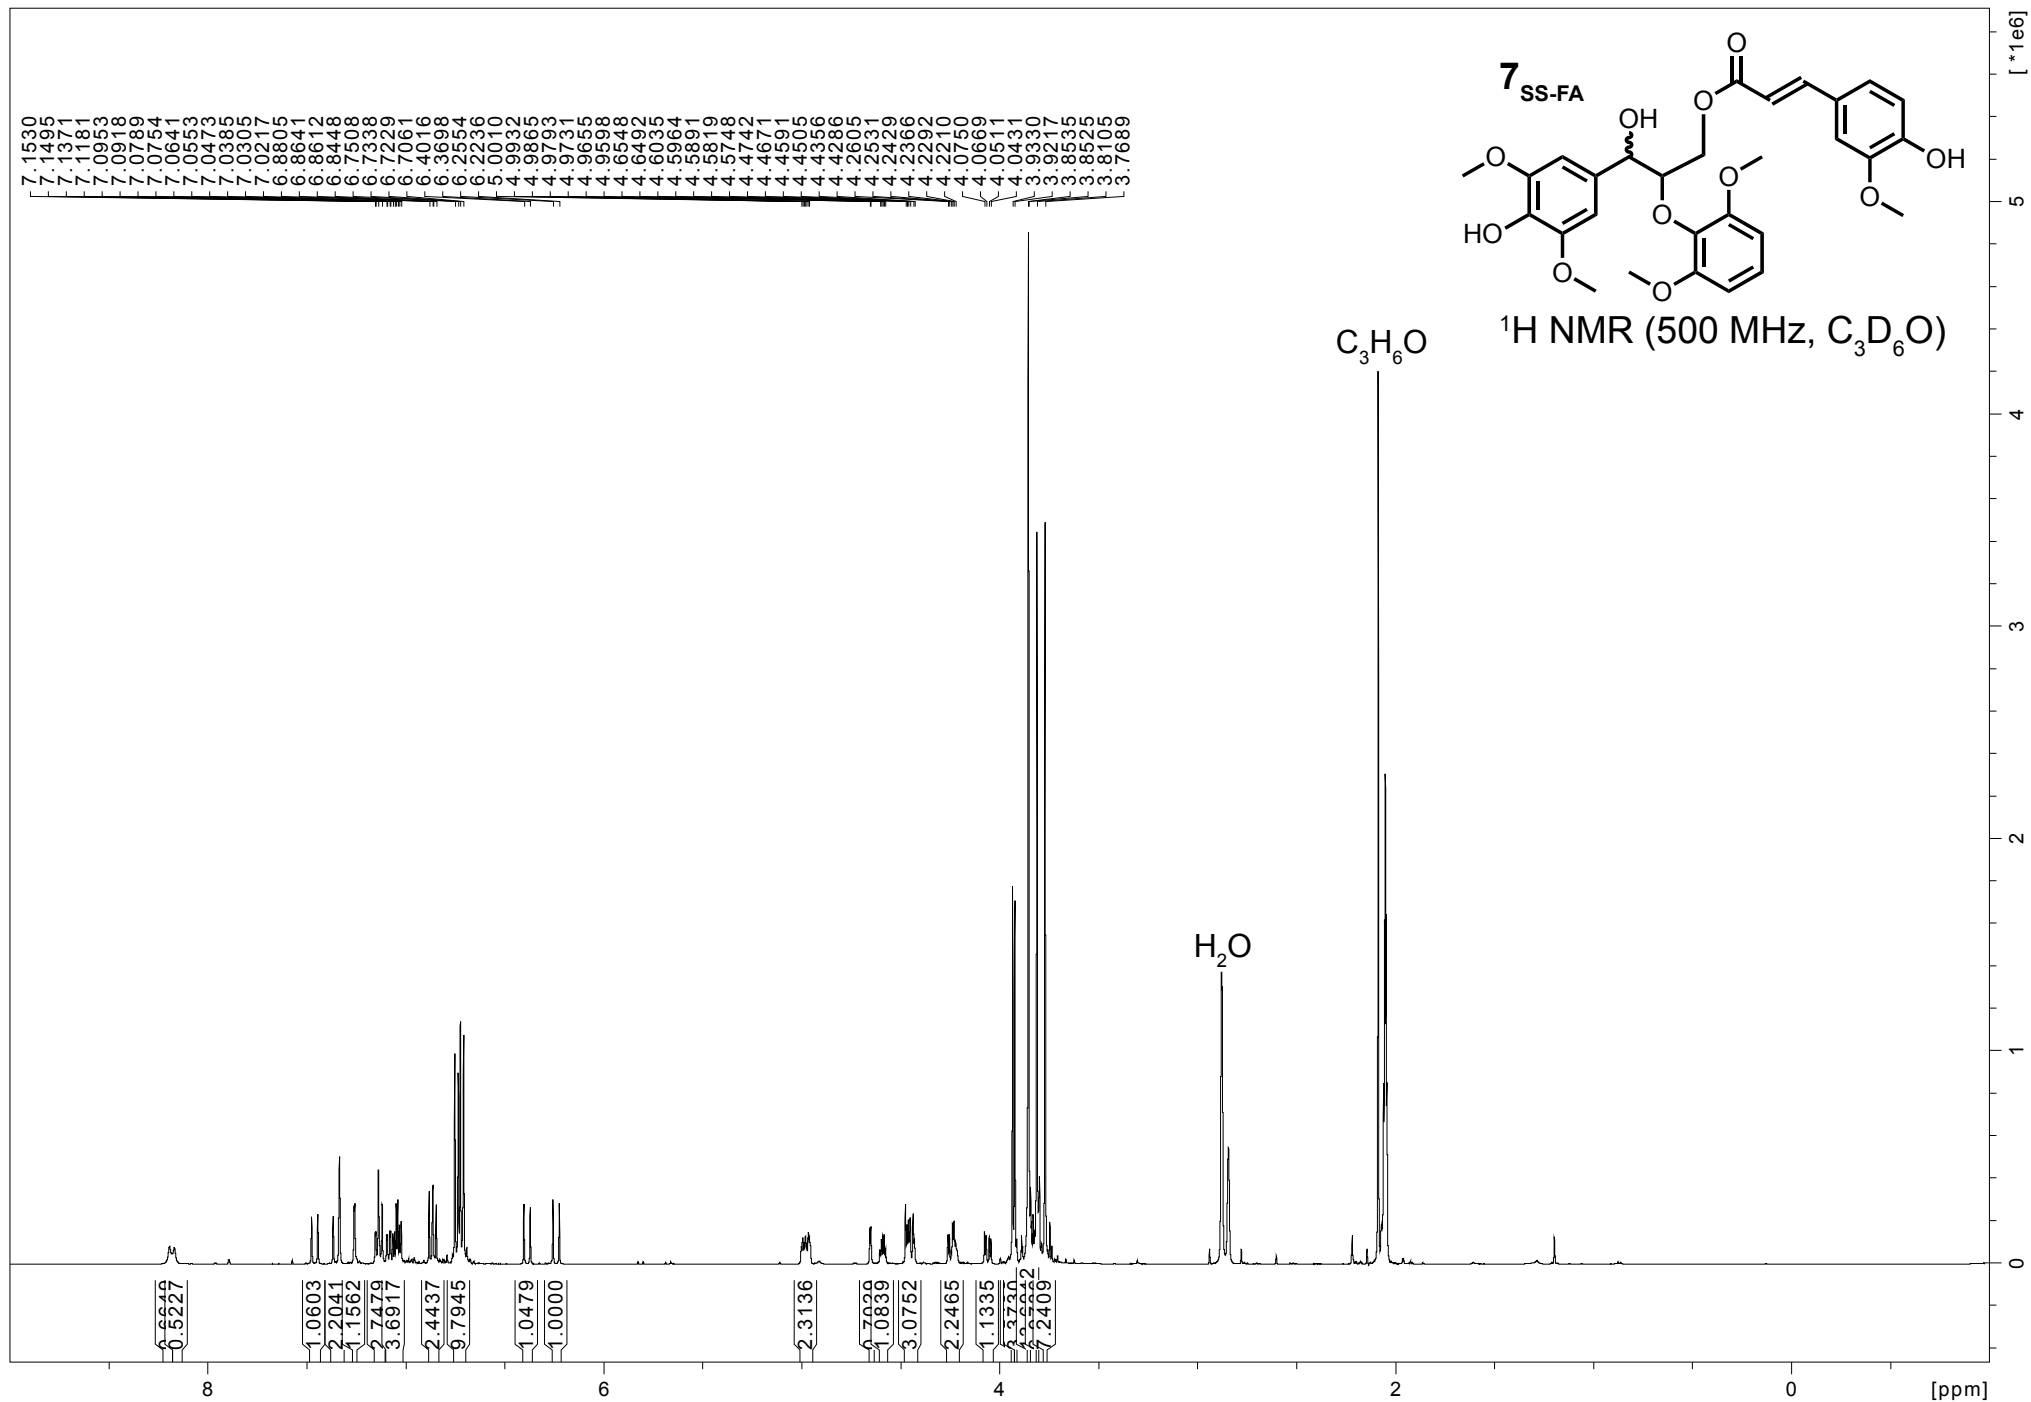

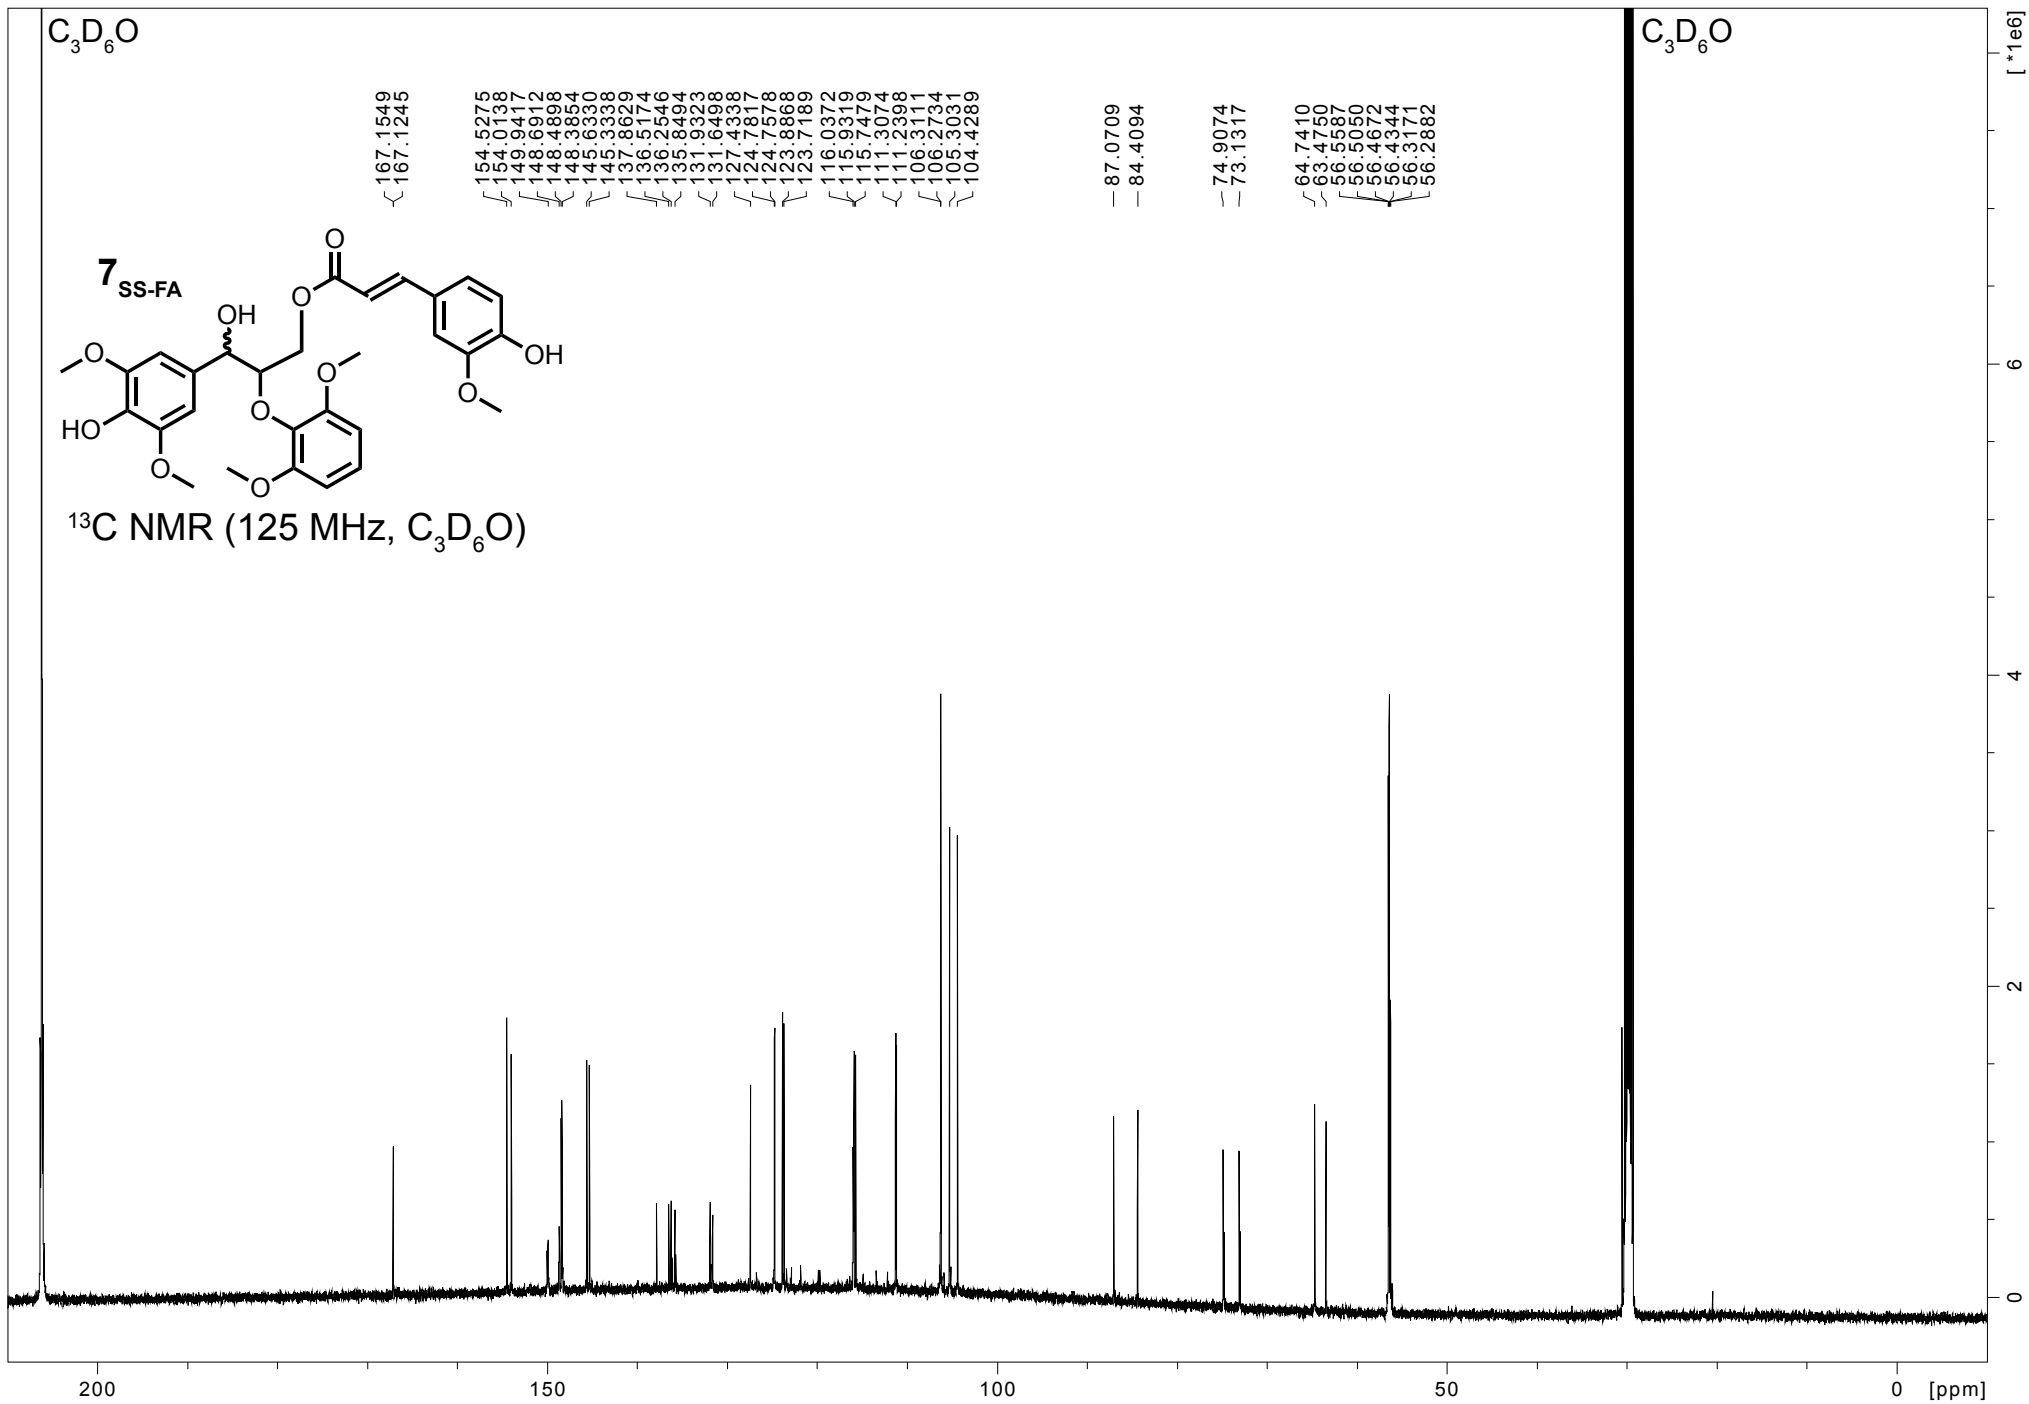

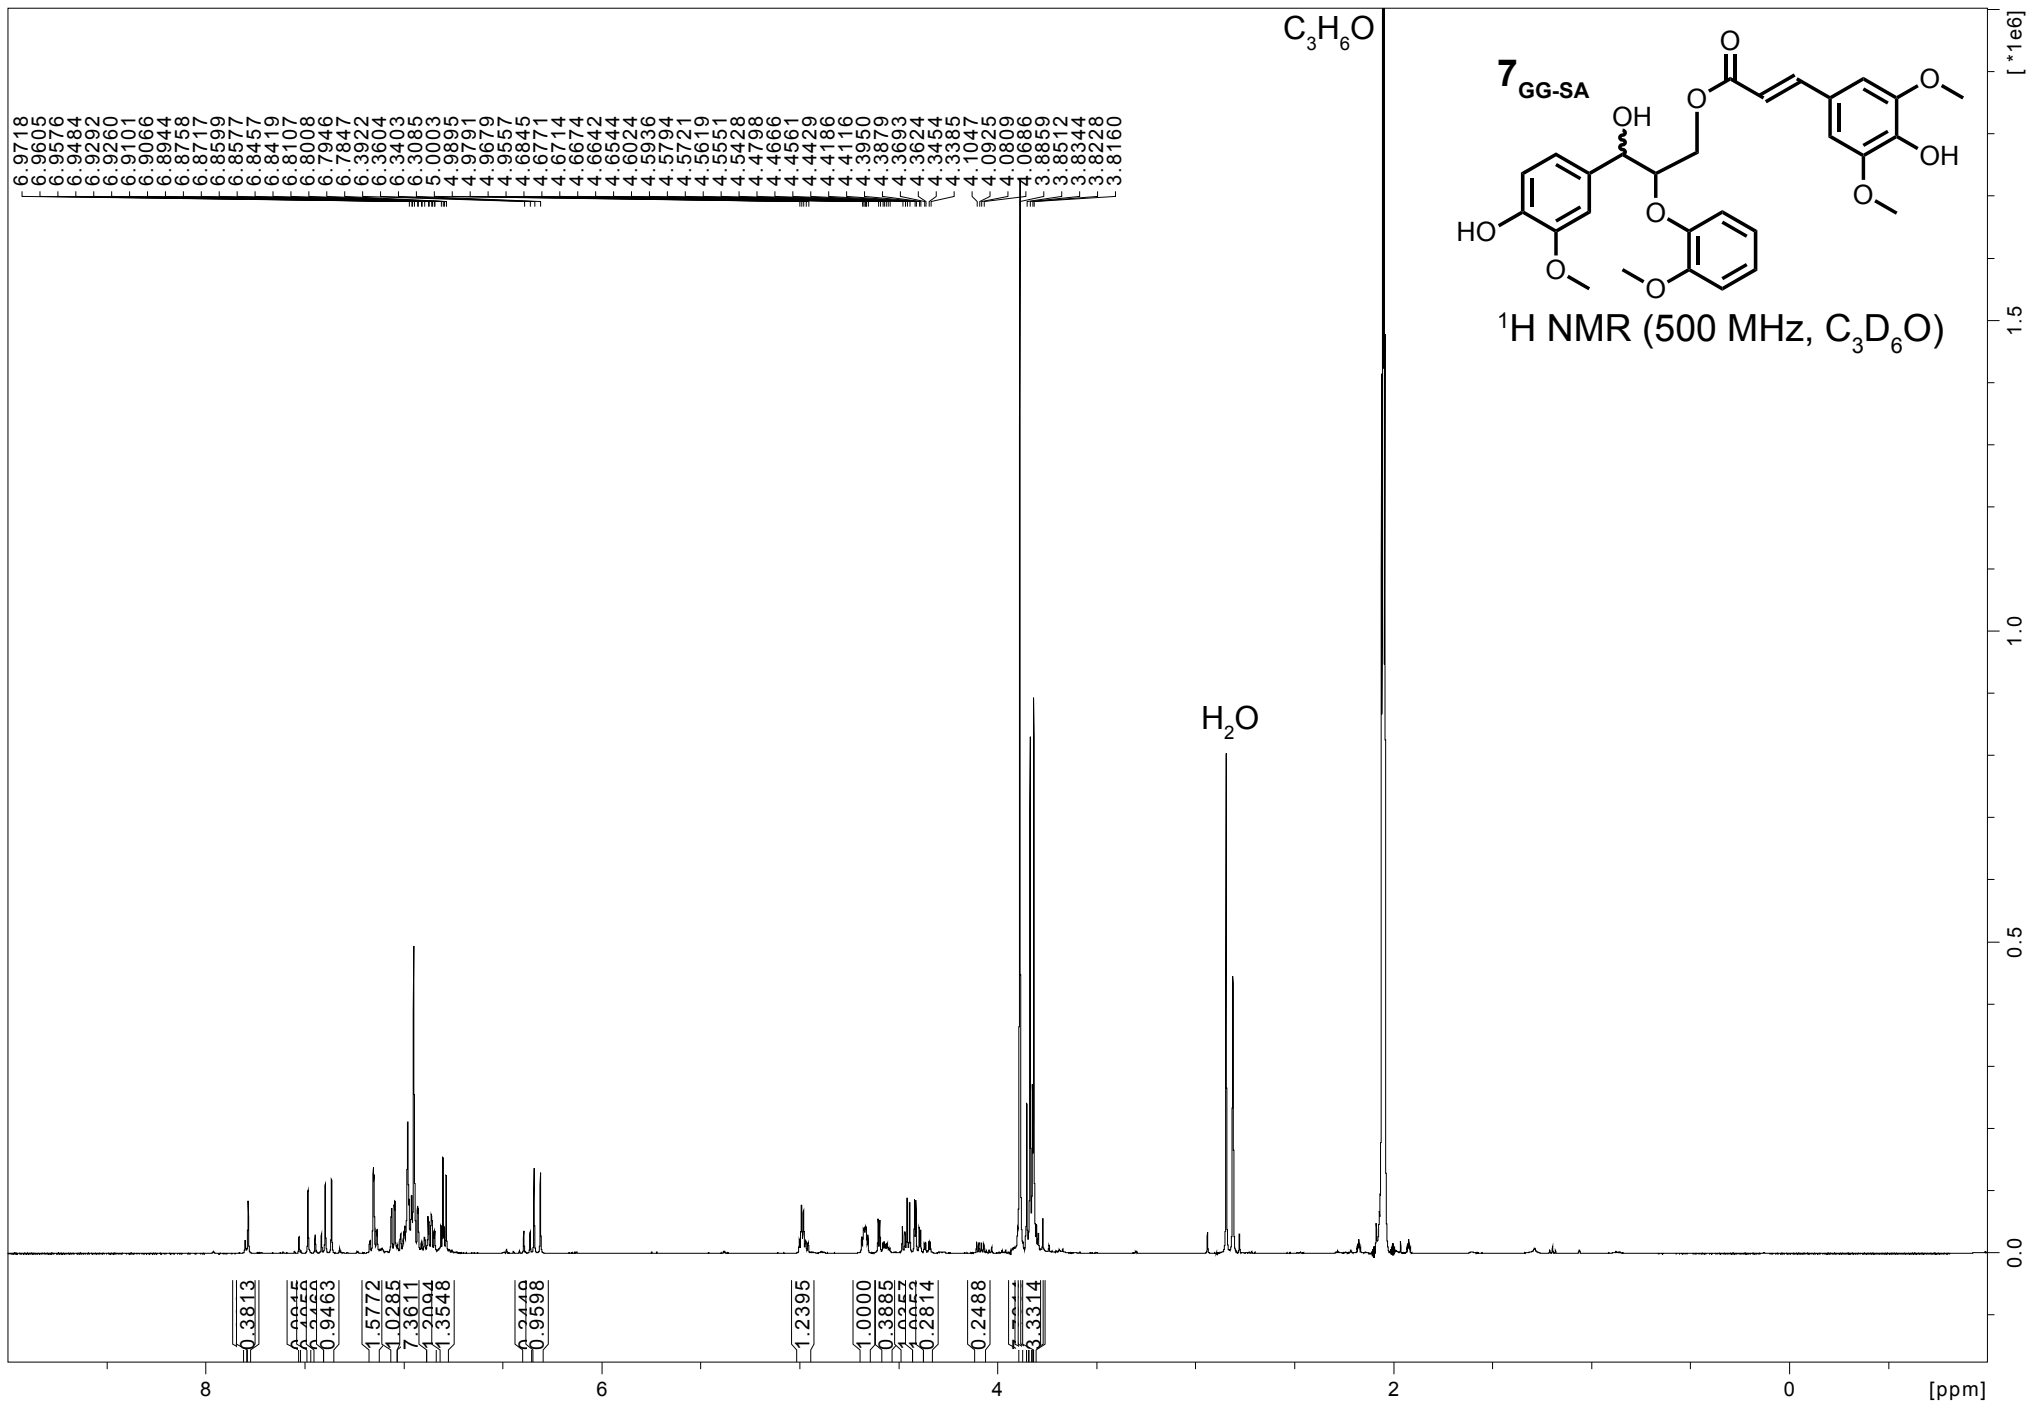

C<sub>3</sub>D<sub>6</sub>O

C<sub>3</sub>D<sub>6</sub>O

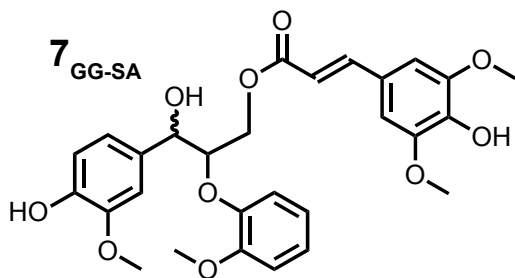

<sup>13</sup>C NMR (125 MHz, C<sub>3</sub>D<sub>6</sub>O)

167.2657  
166.9135  
152.0209  
151.7710  
148.8740  
148.8478  
148.0238  
148.0049  
146.2820  
146.1196  
133.6454  
126.0560  
123.5222  
123.4692  
121.7148  
121.7054  
120.2732  
120.2416  
119.6108  
119.5340  
116.7247  
116.6938  
115.9231  
115.8122  
115.1804  
115.1737  
113.5816  
113.5414  
111.1359  
111.1082  
109.8685  
106.7667  
106.7082

83.5743  
83.4413

73.7582  
73.0953

64.1735  
63.9412  
56.6340  
56.5412  
56.4966  
56.1906  
56.1753

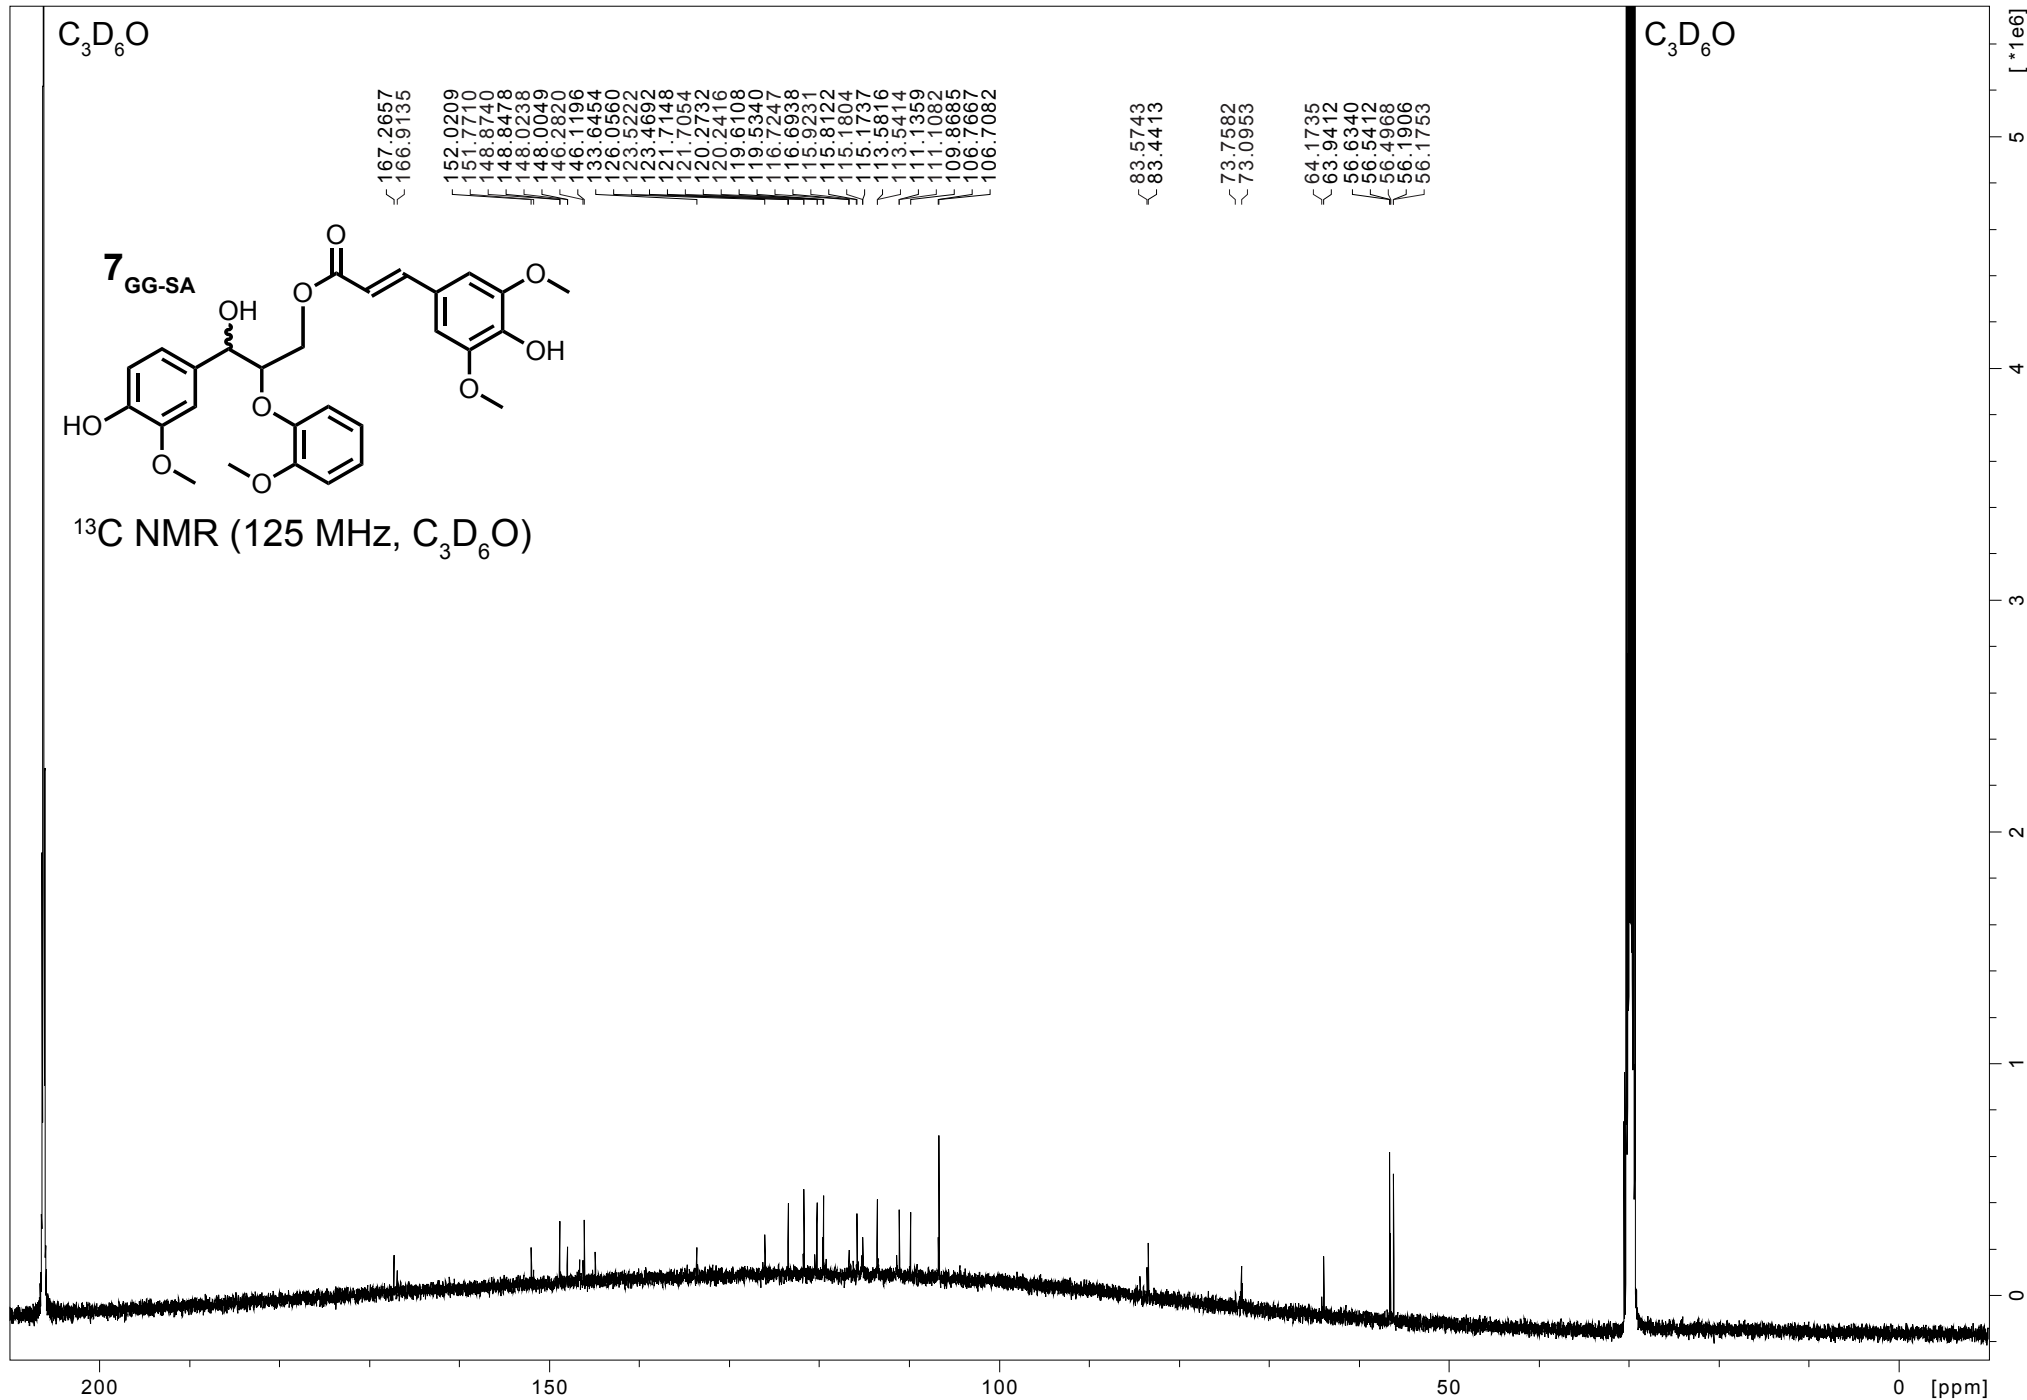

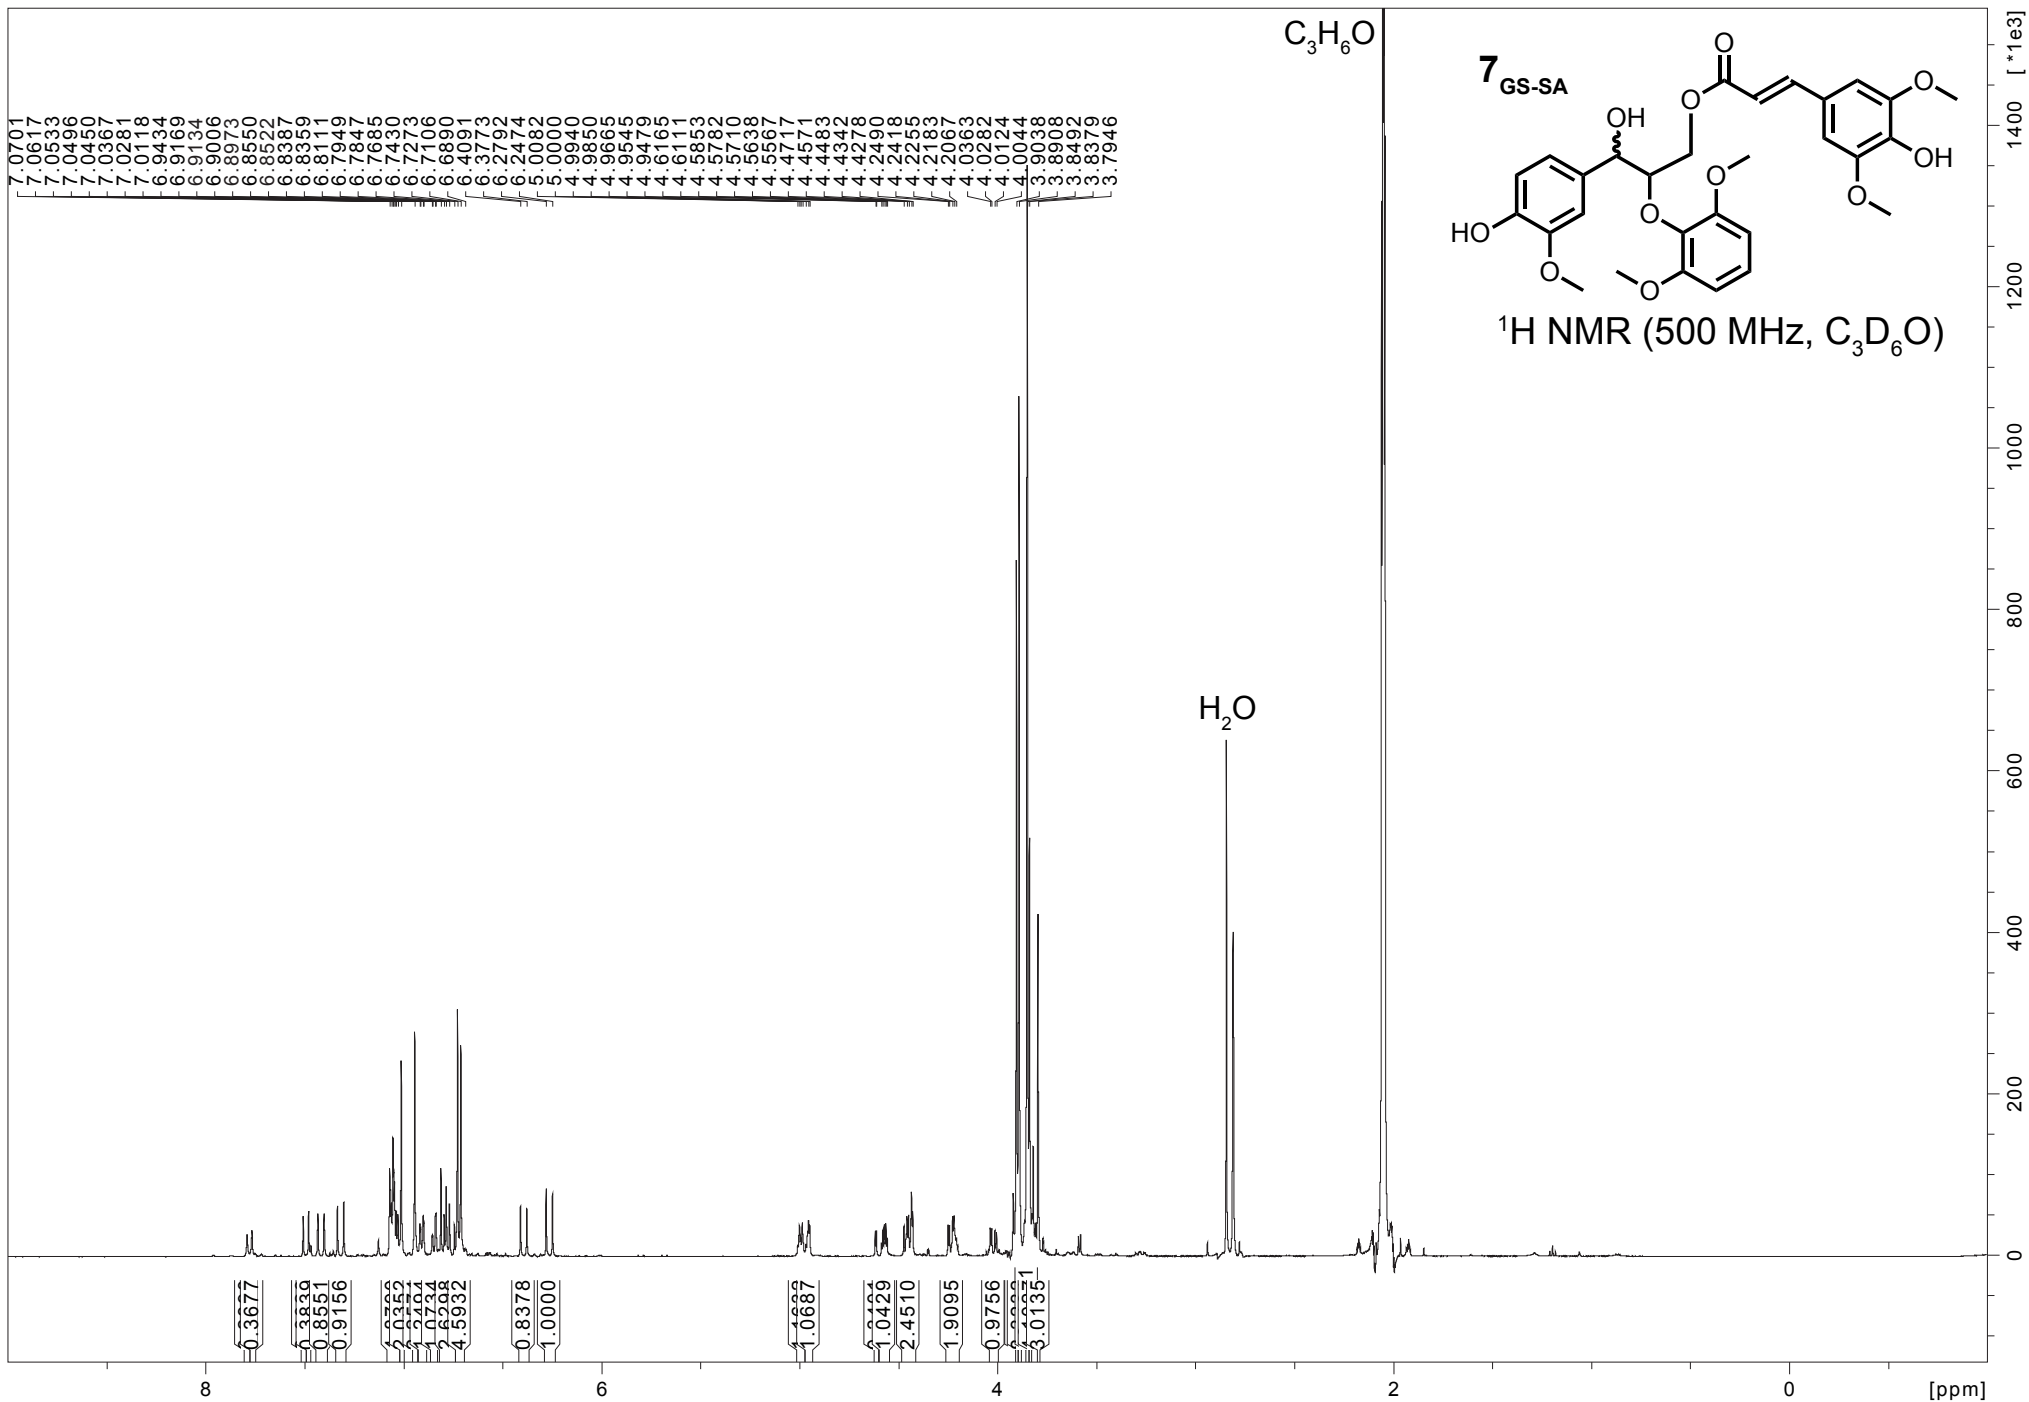

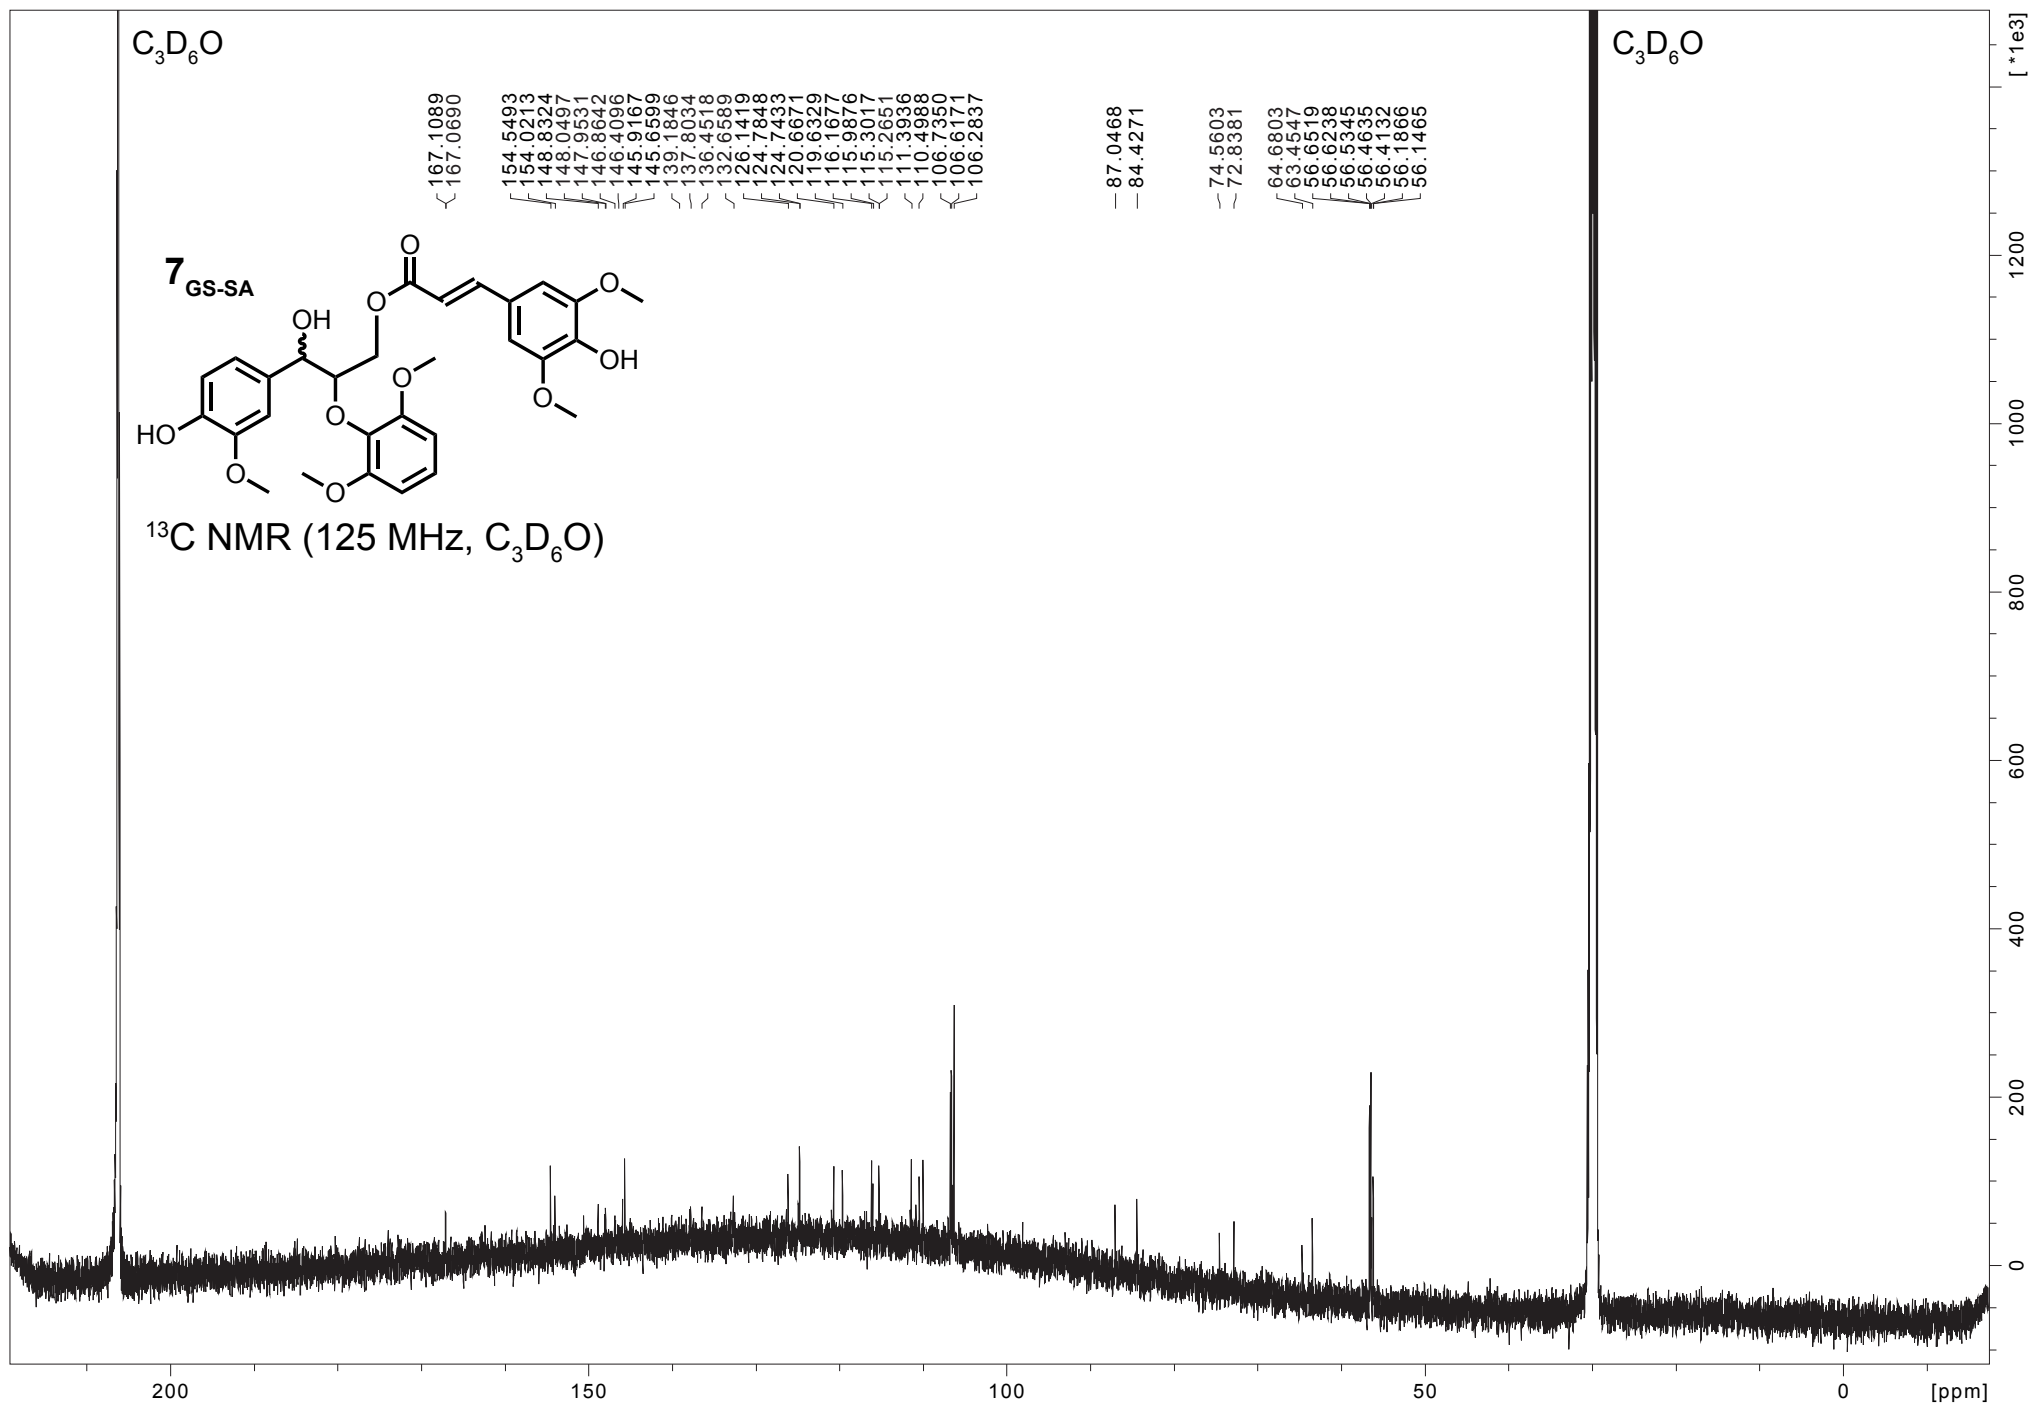

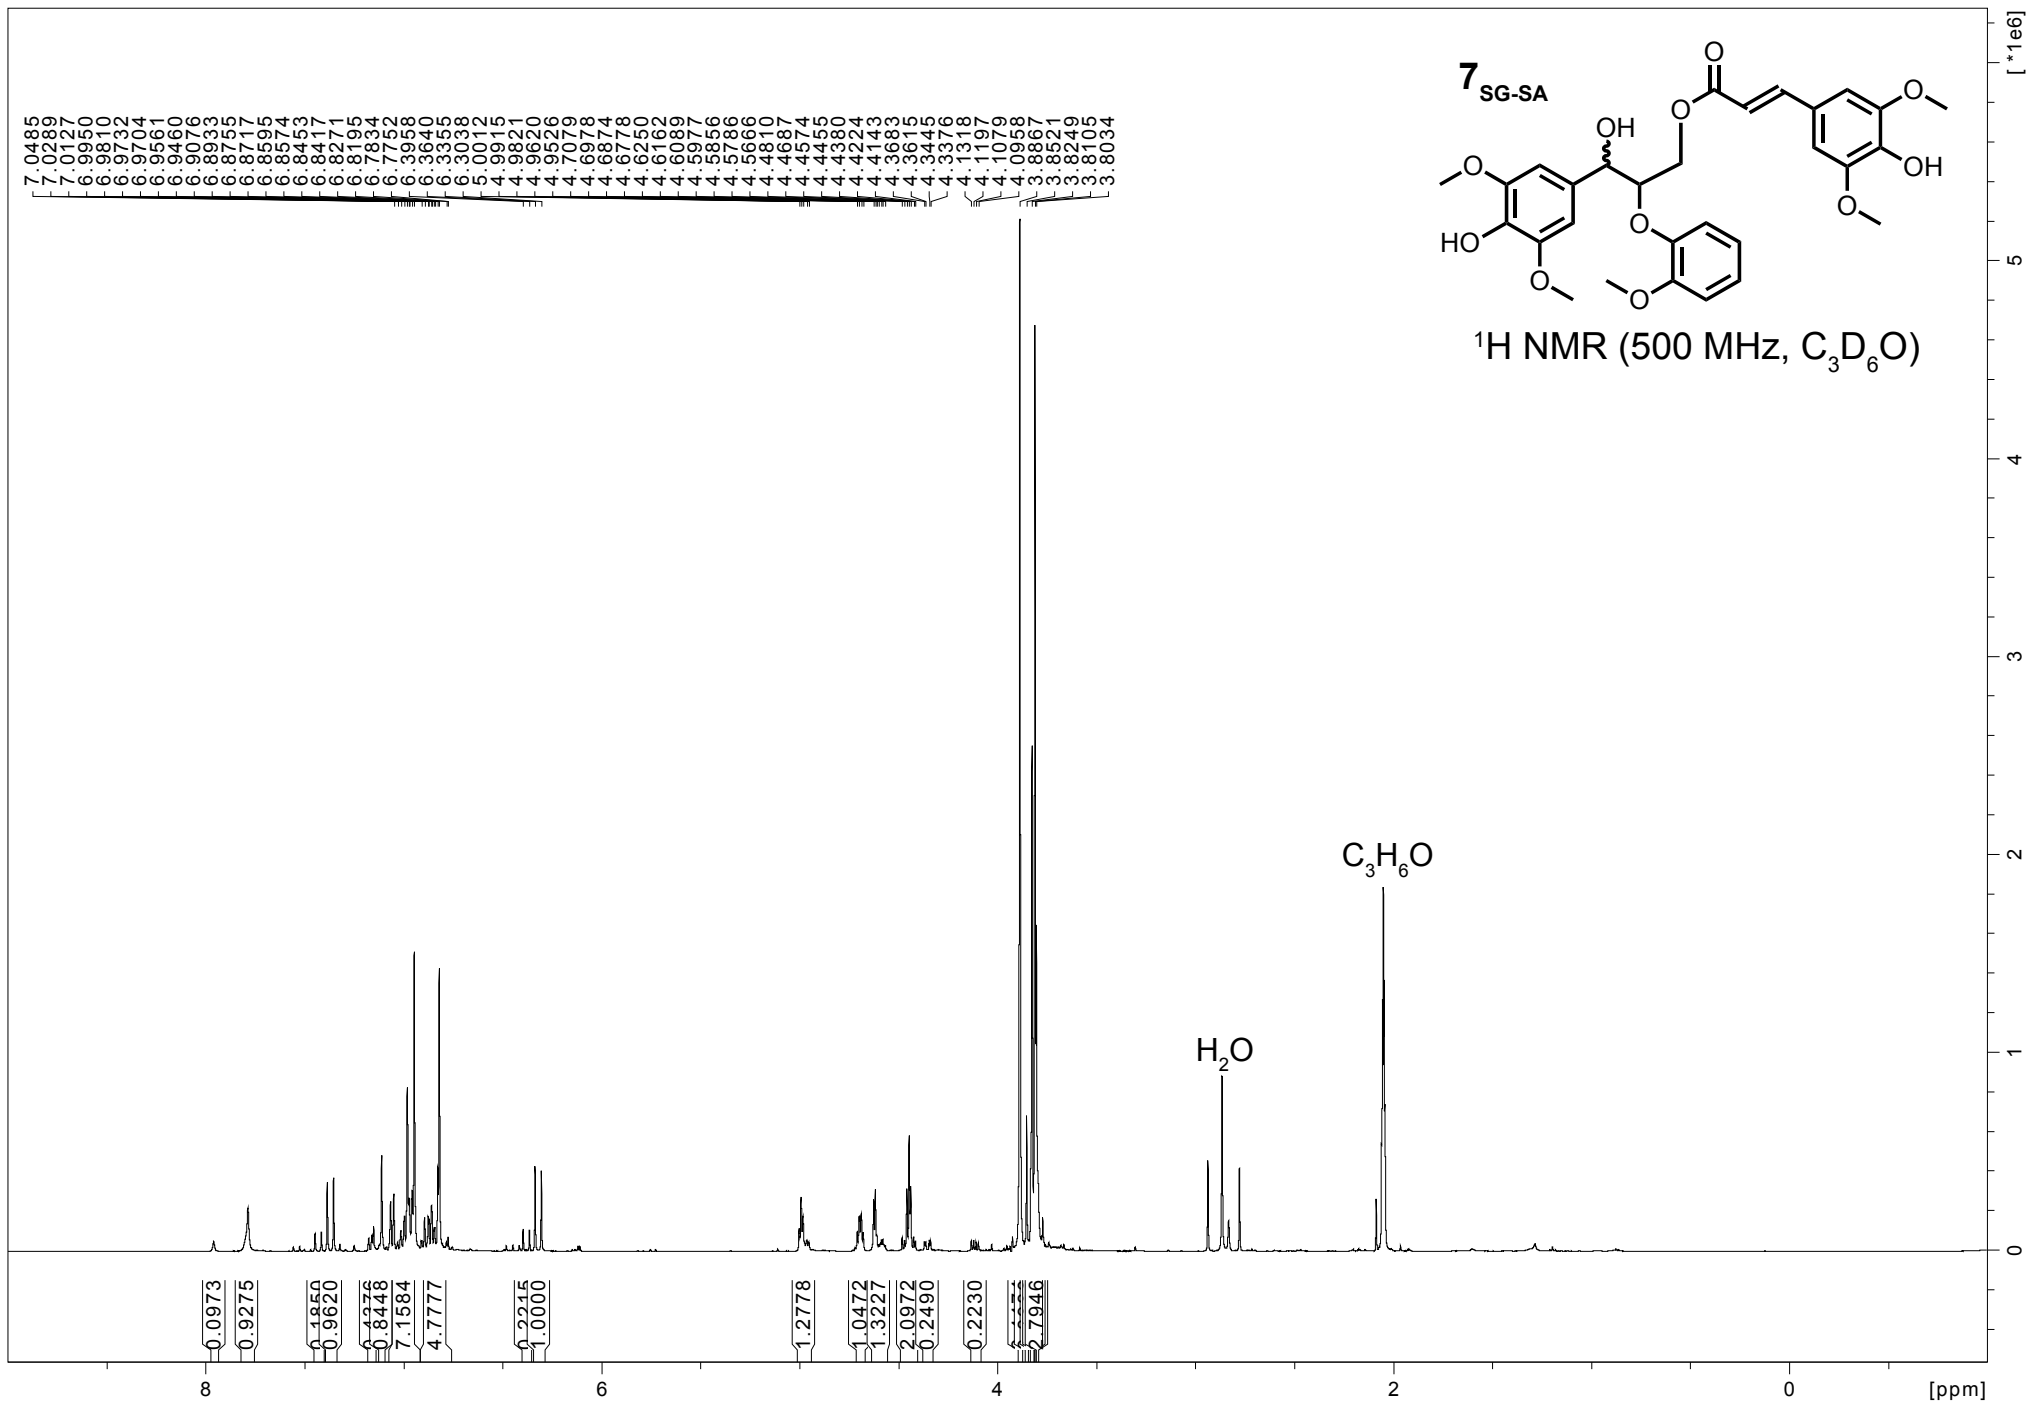



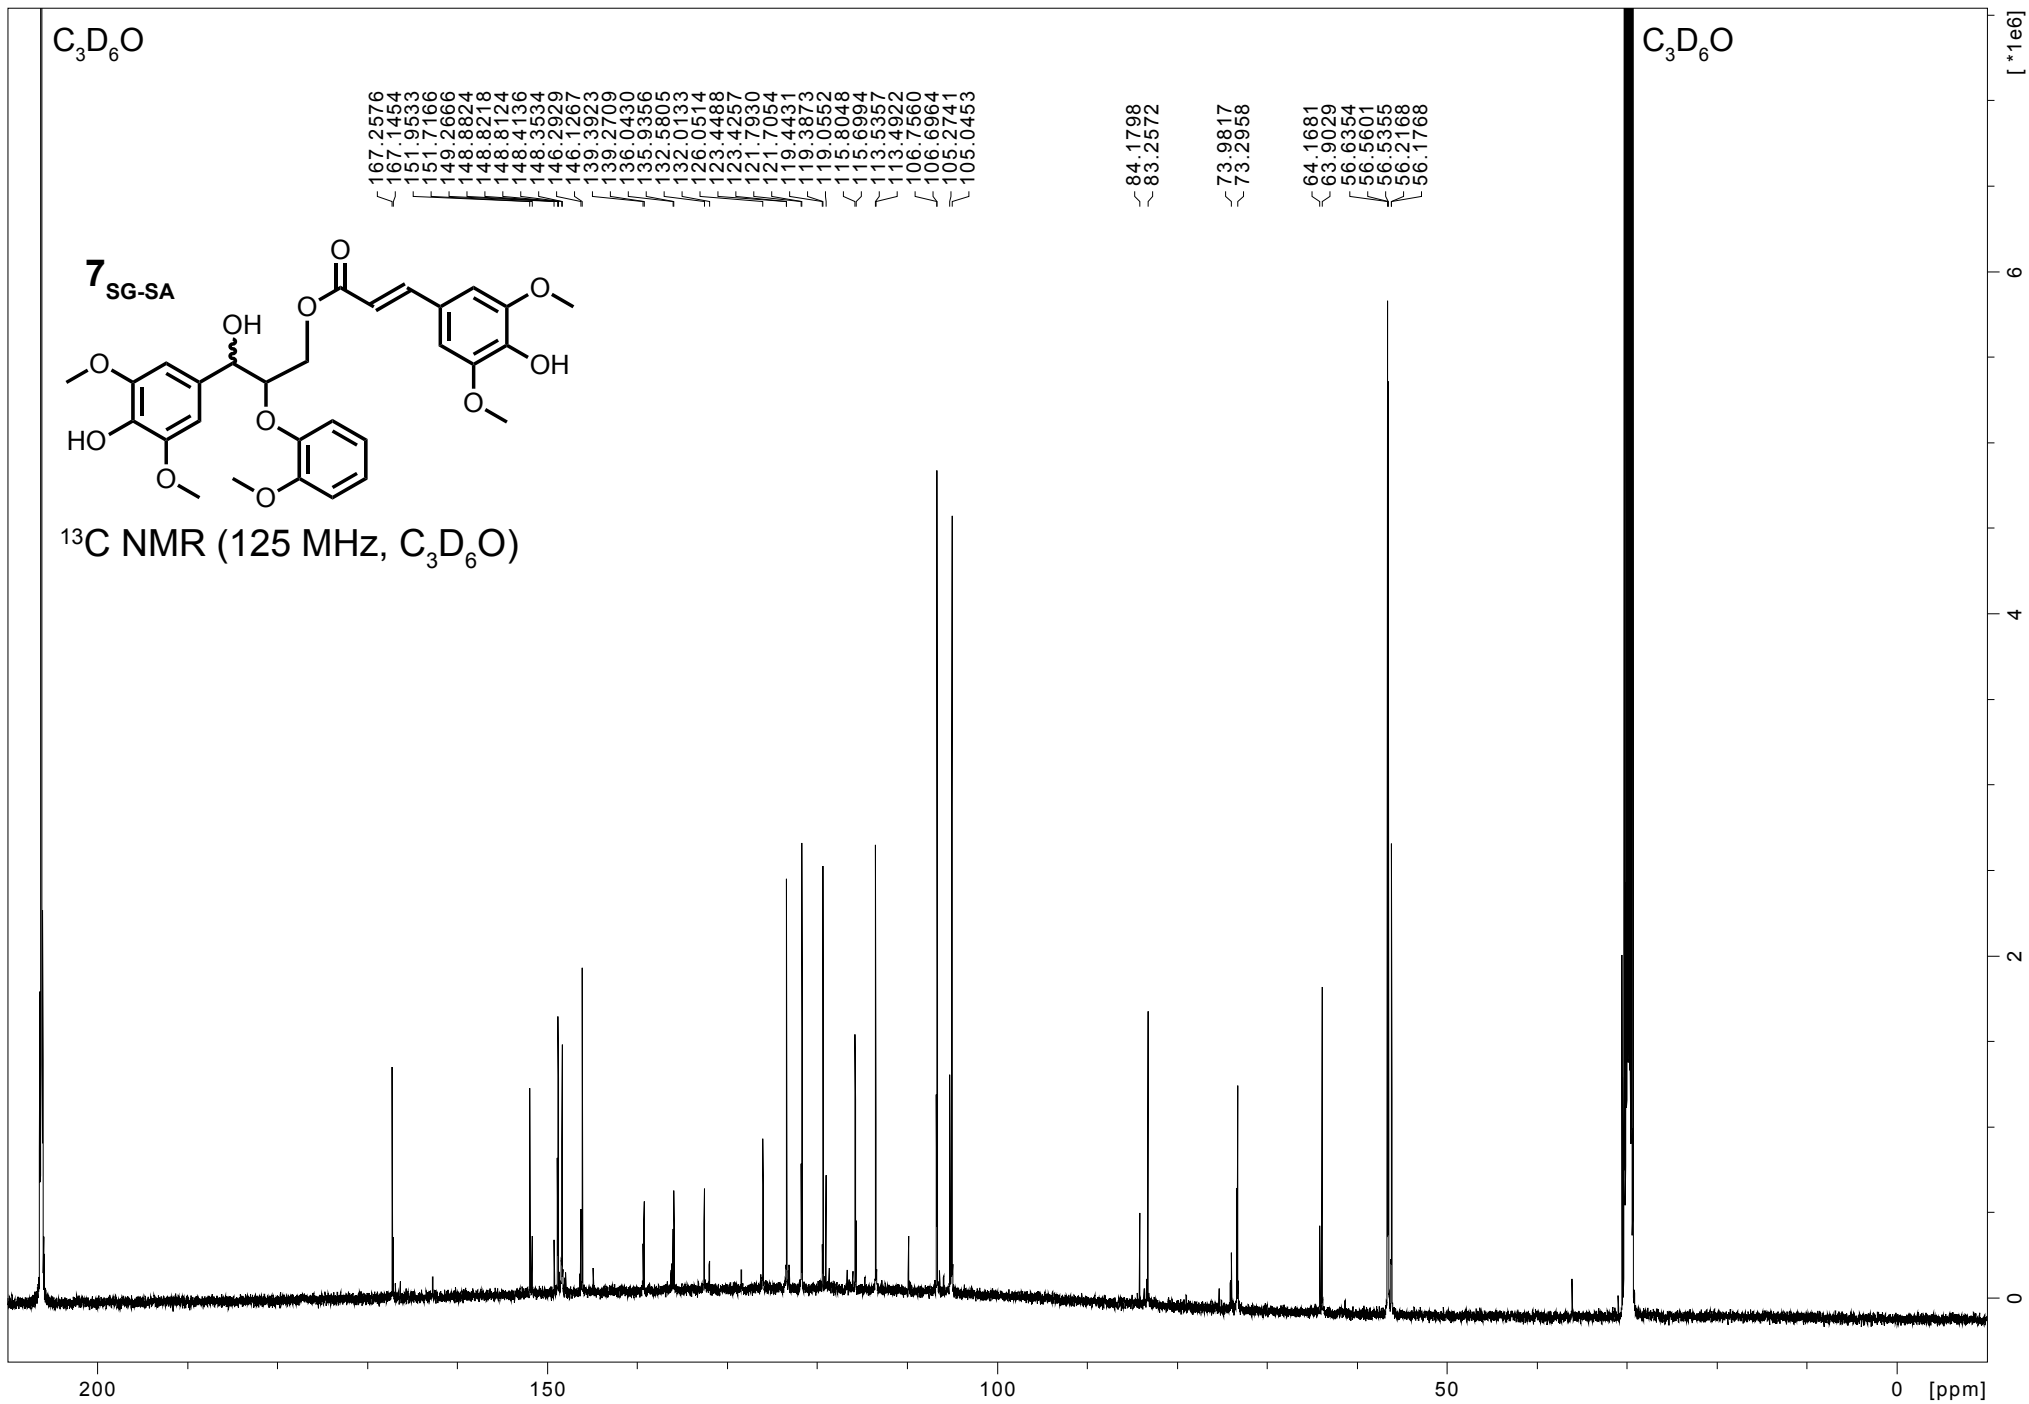

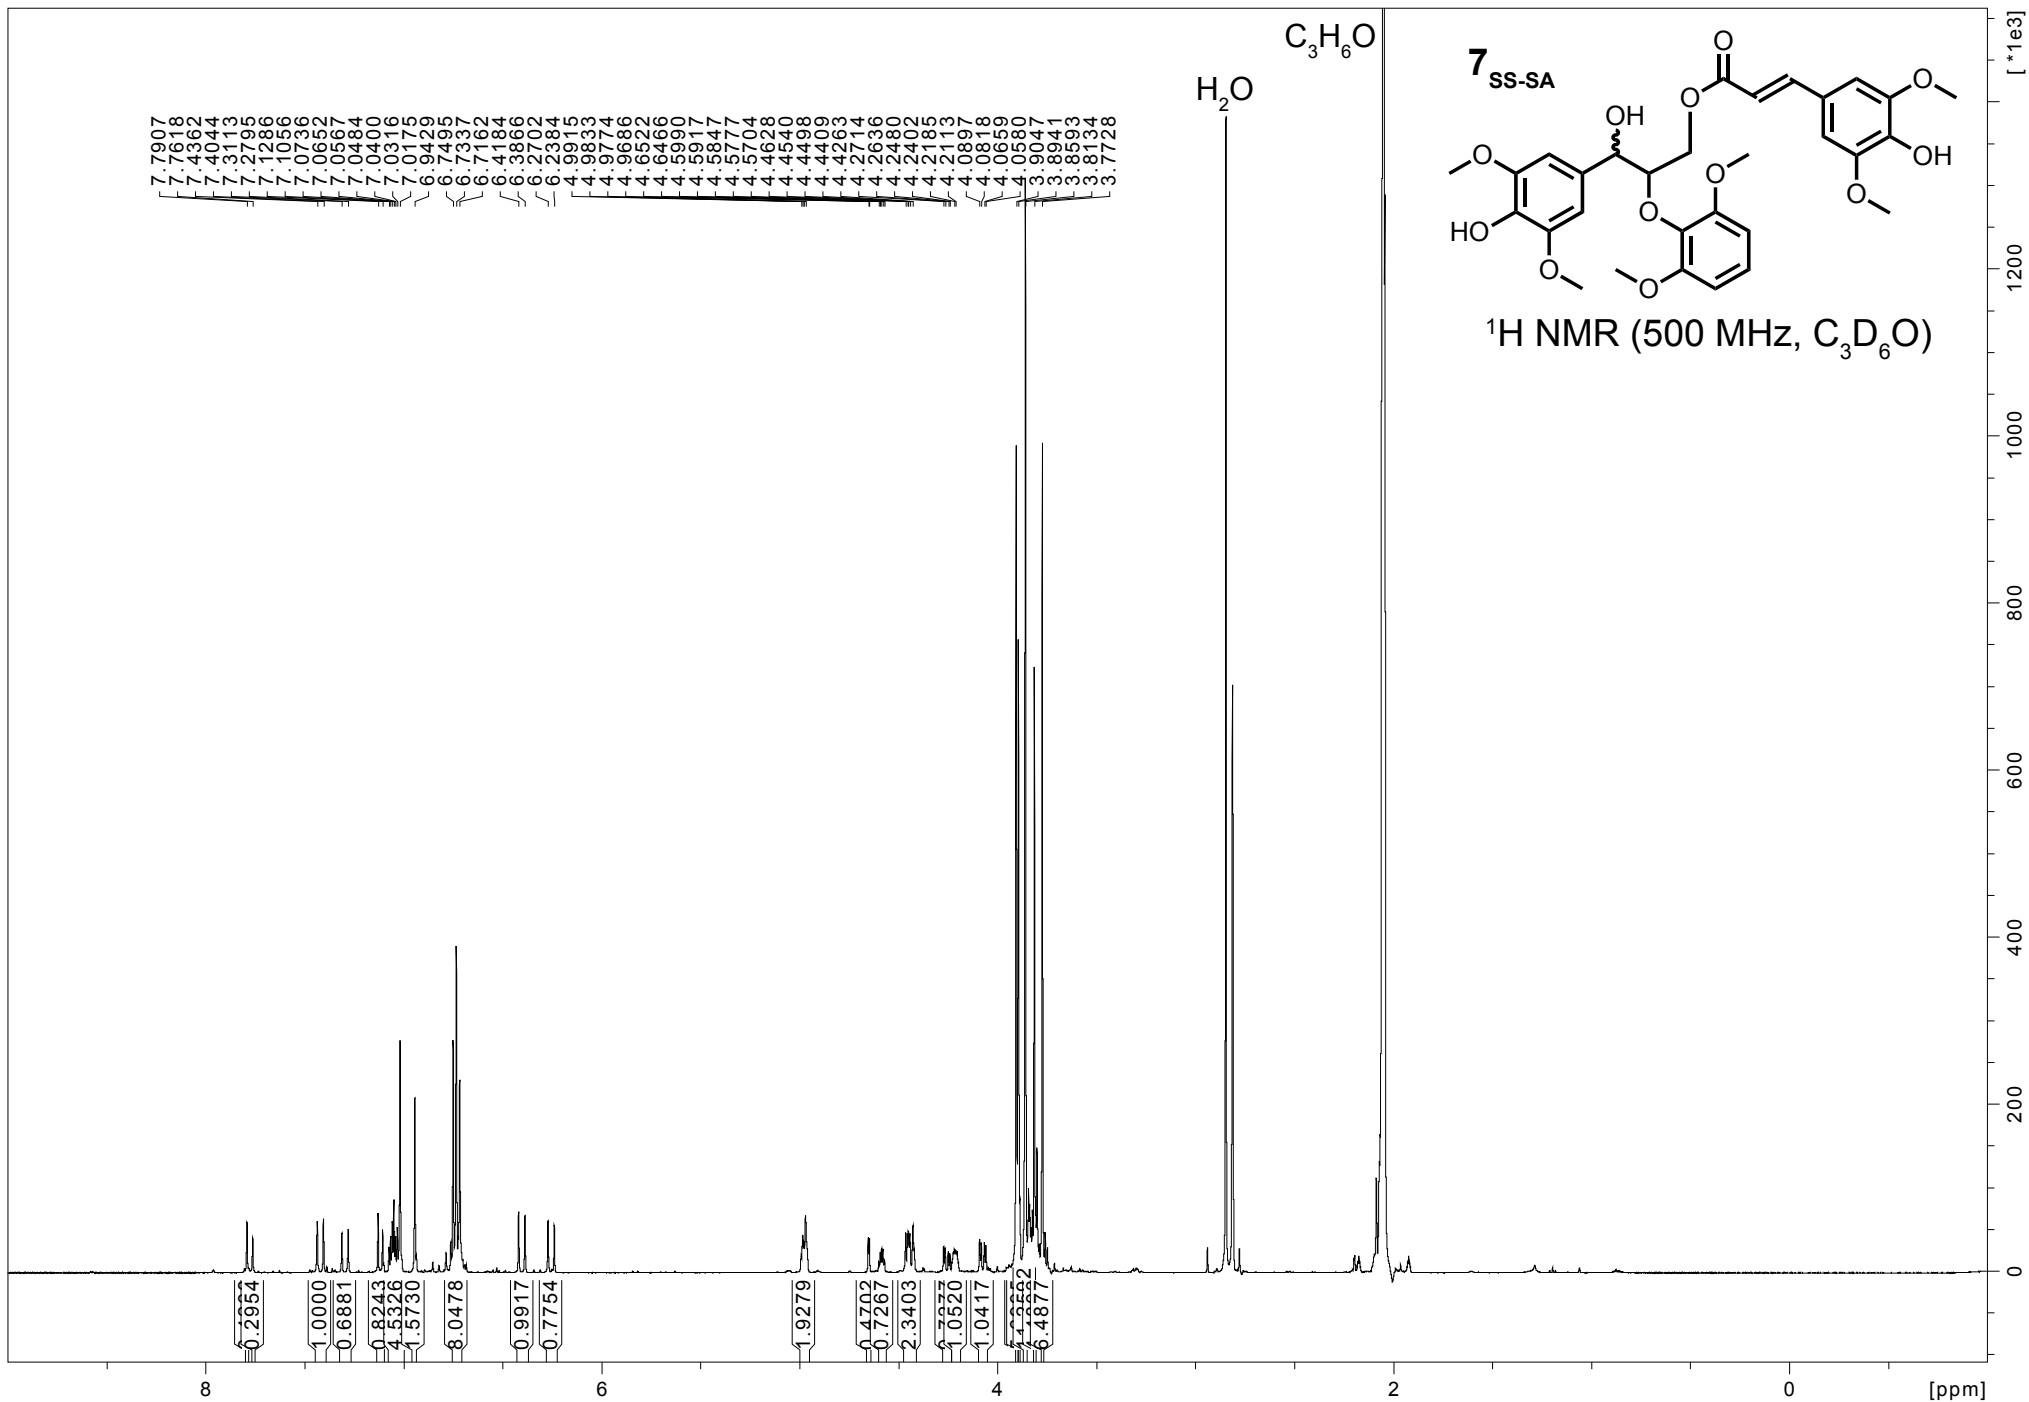

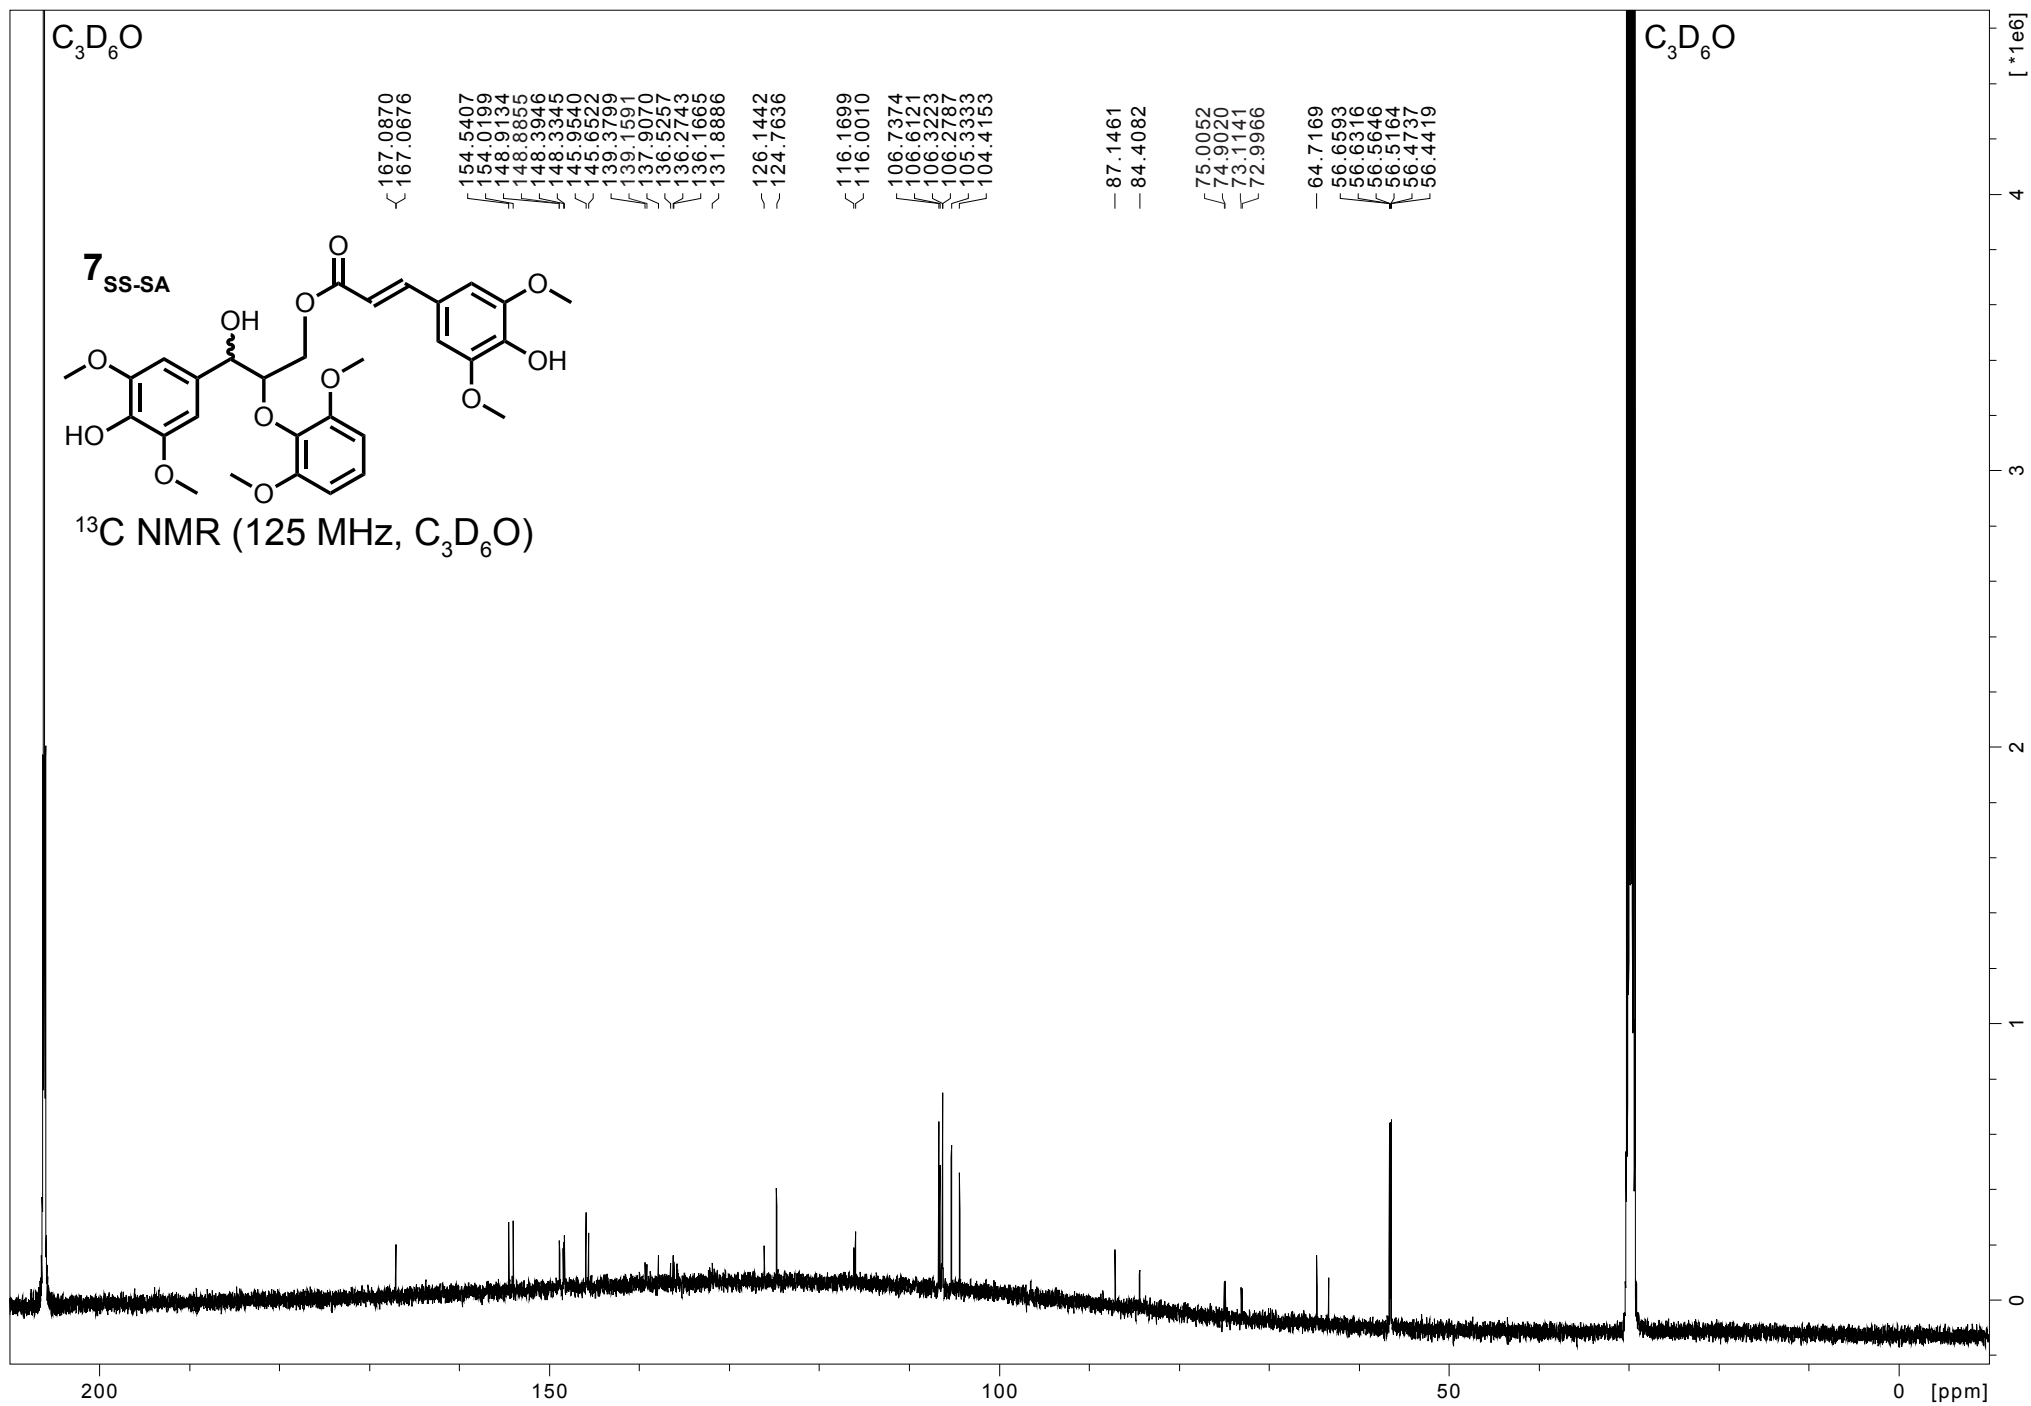

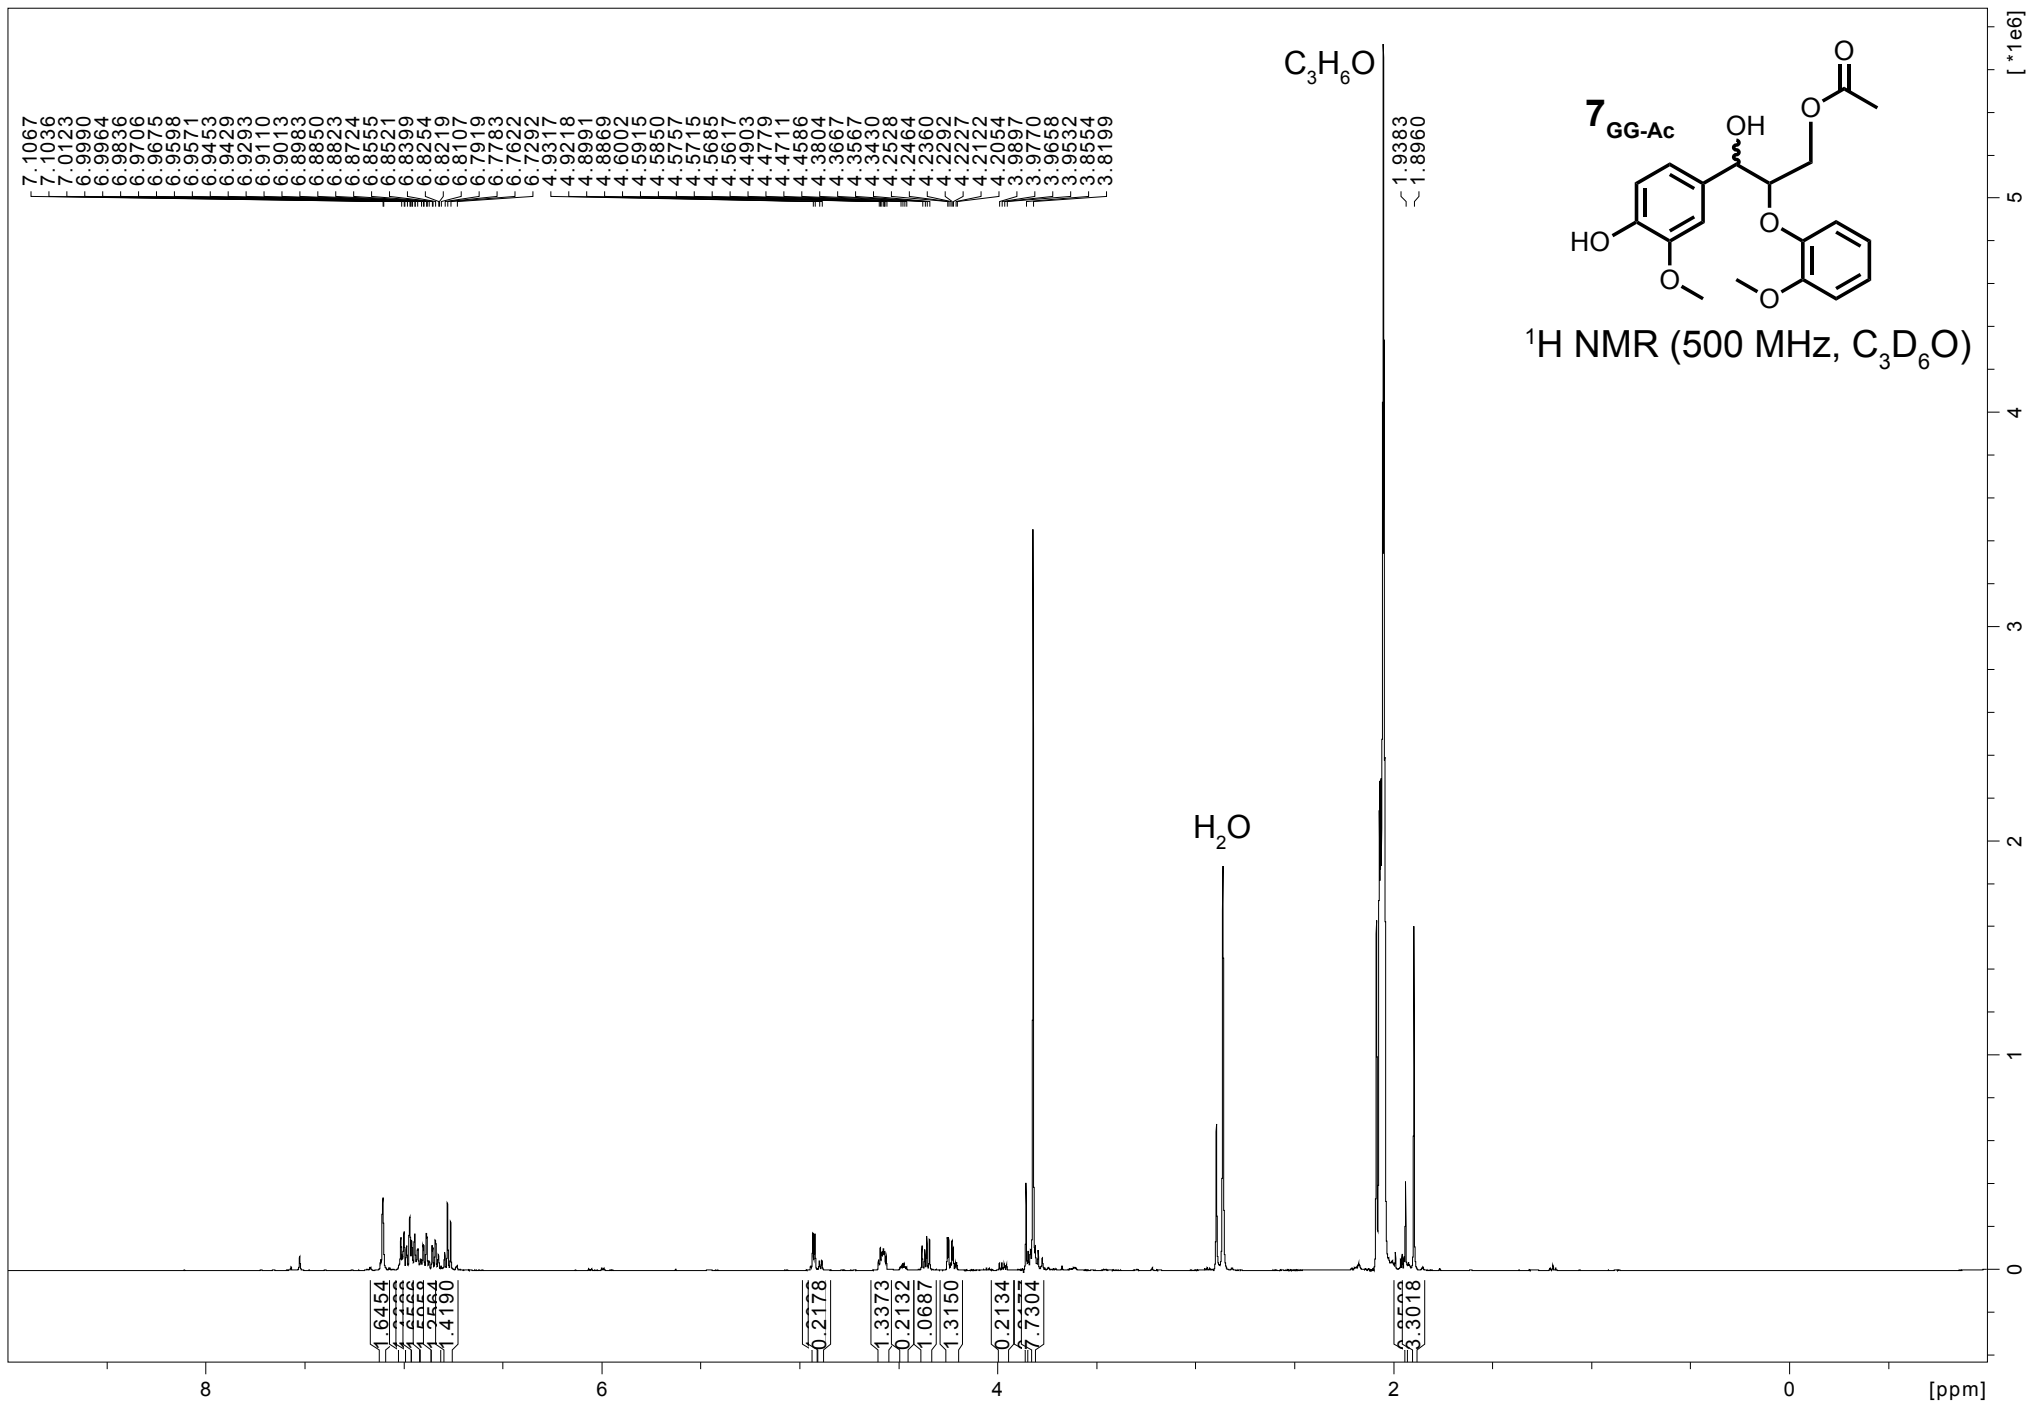

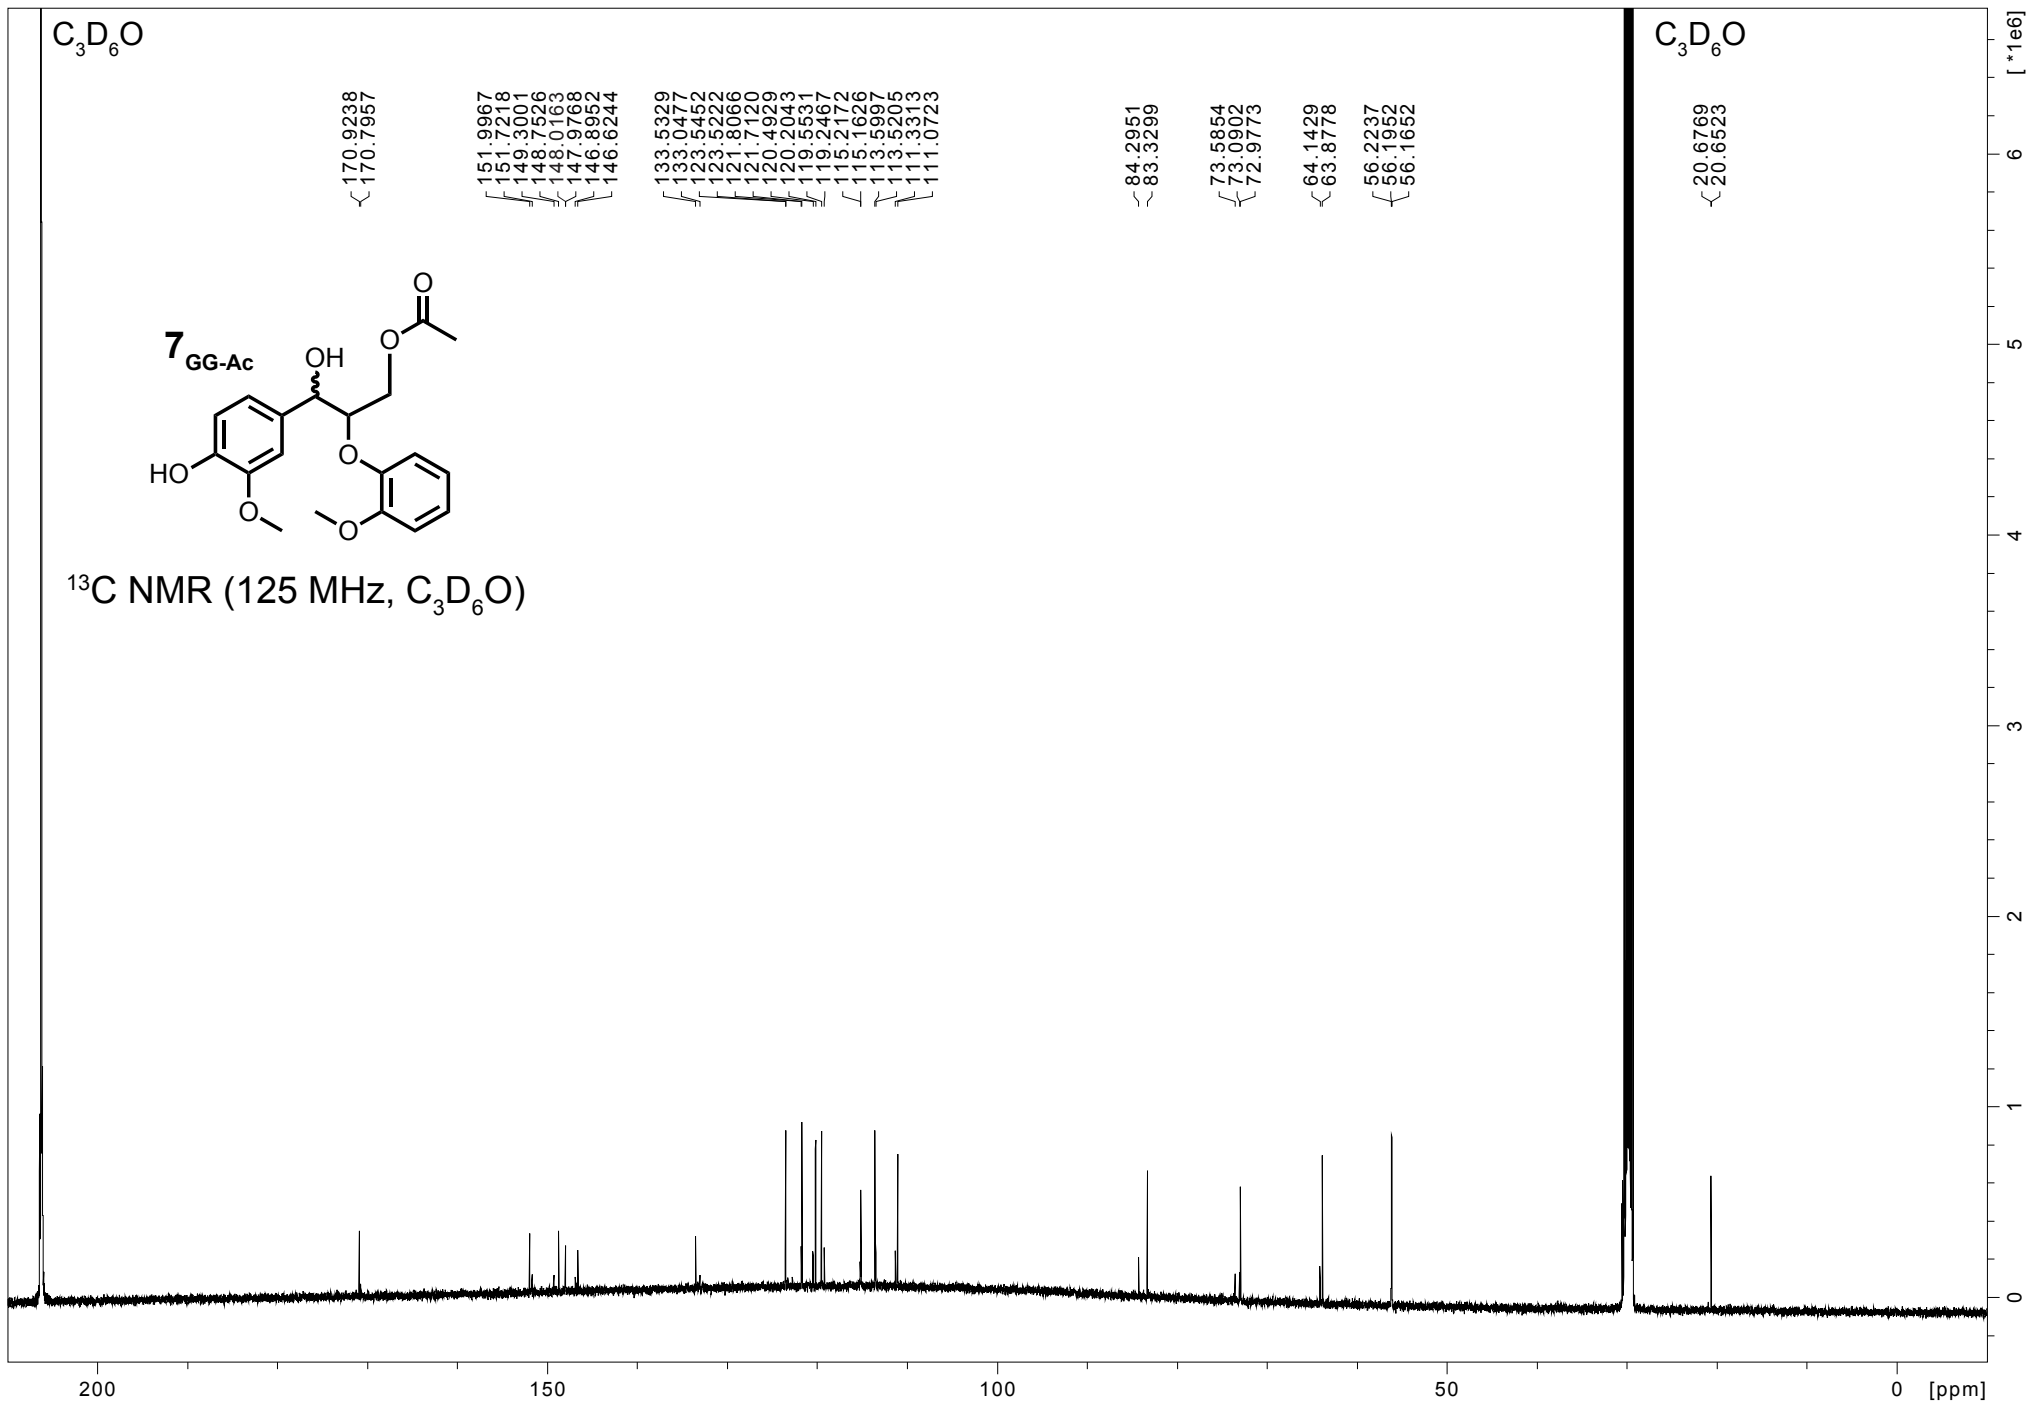

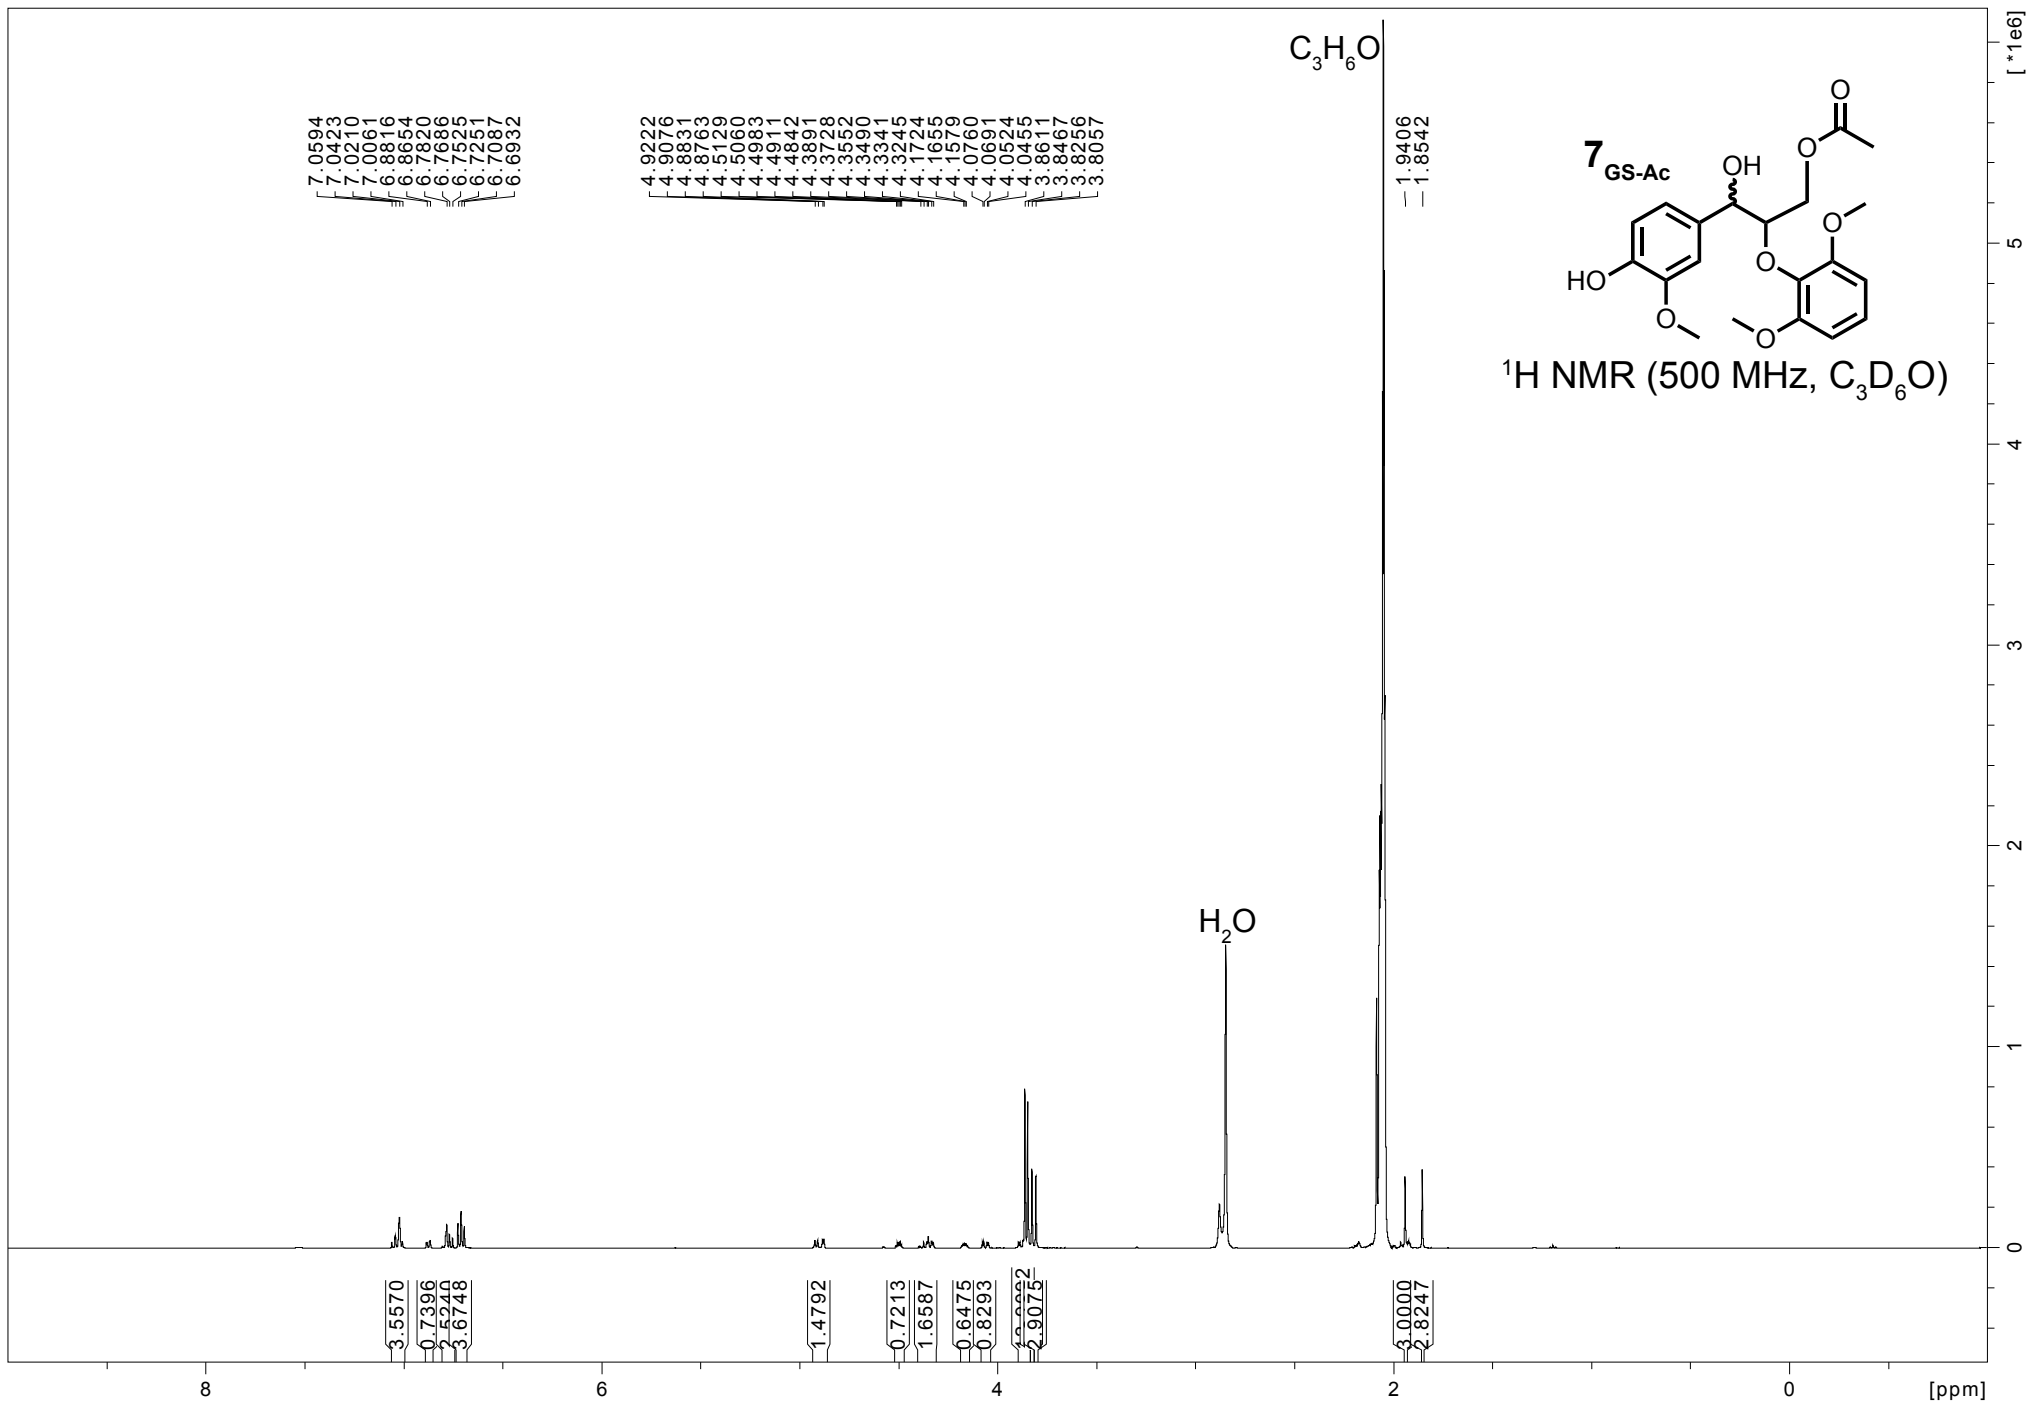

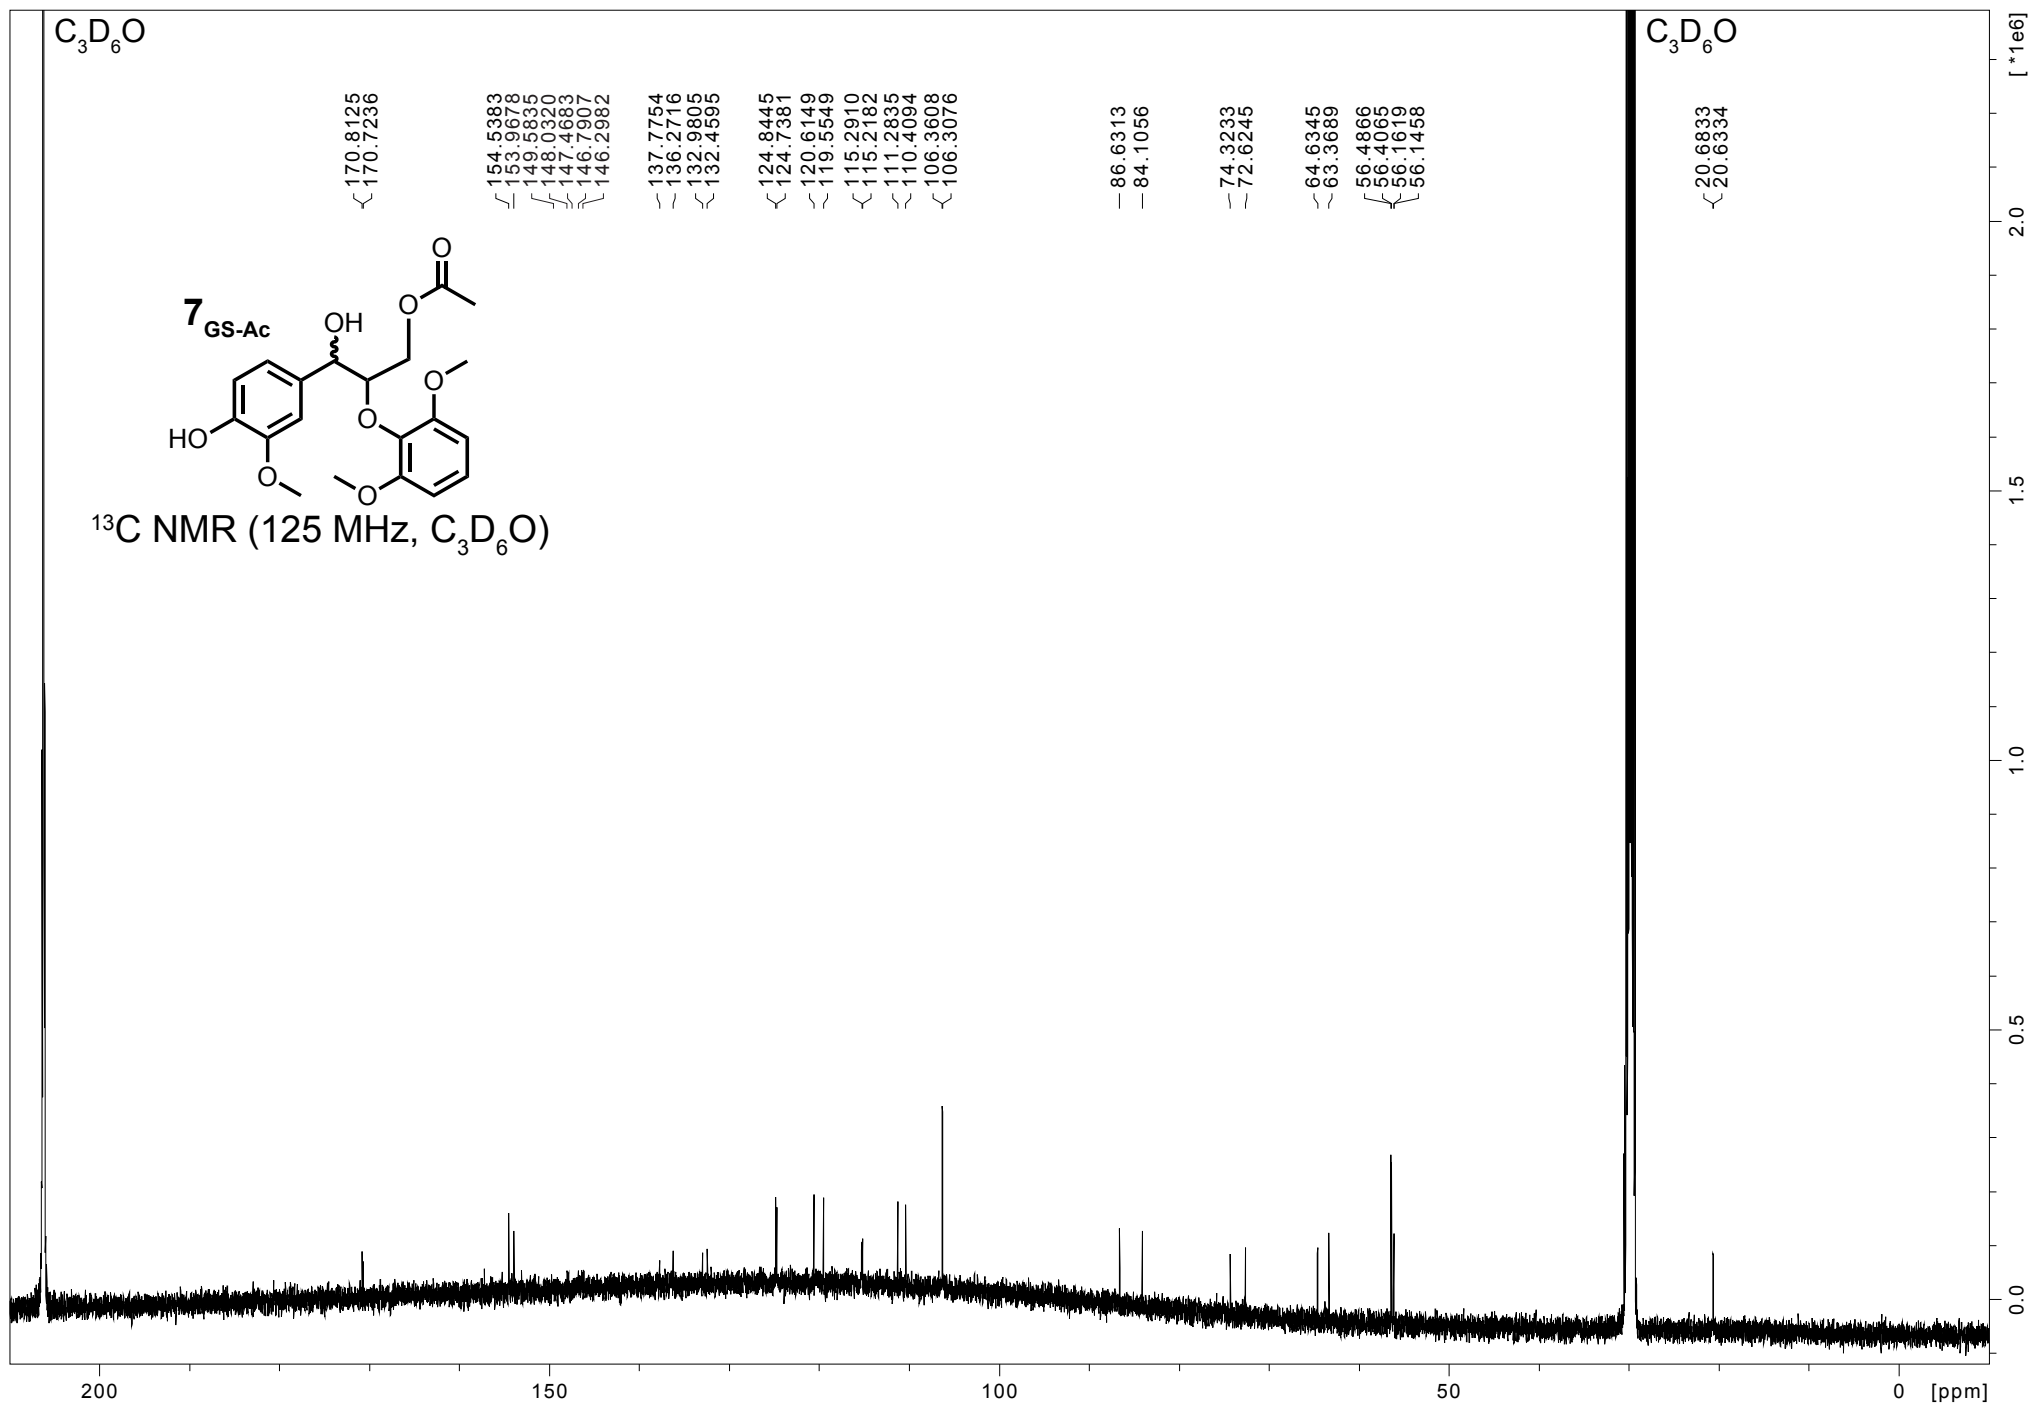

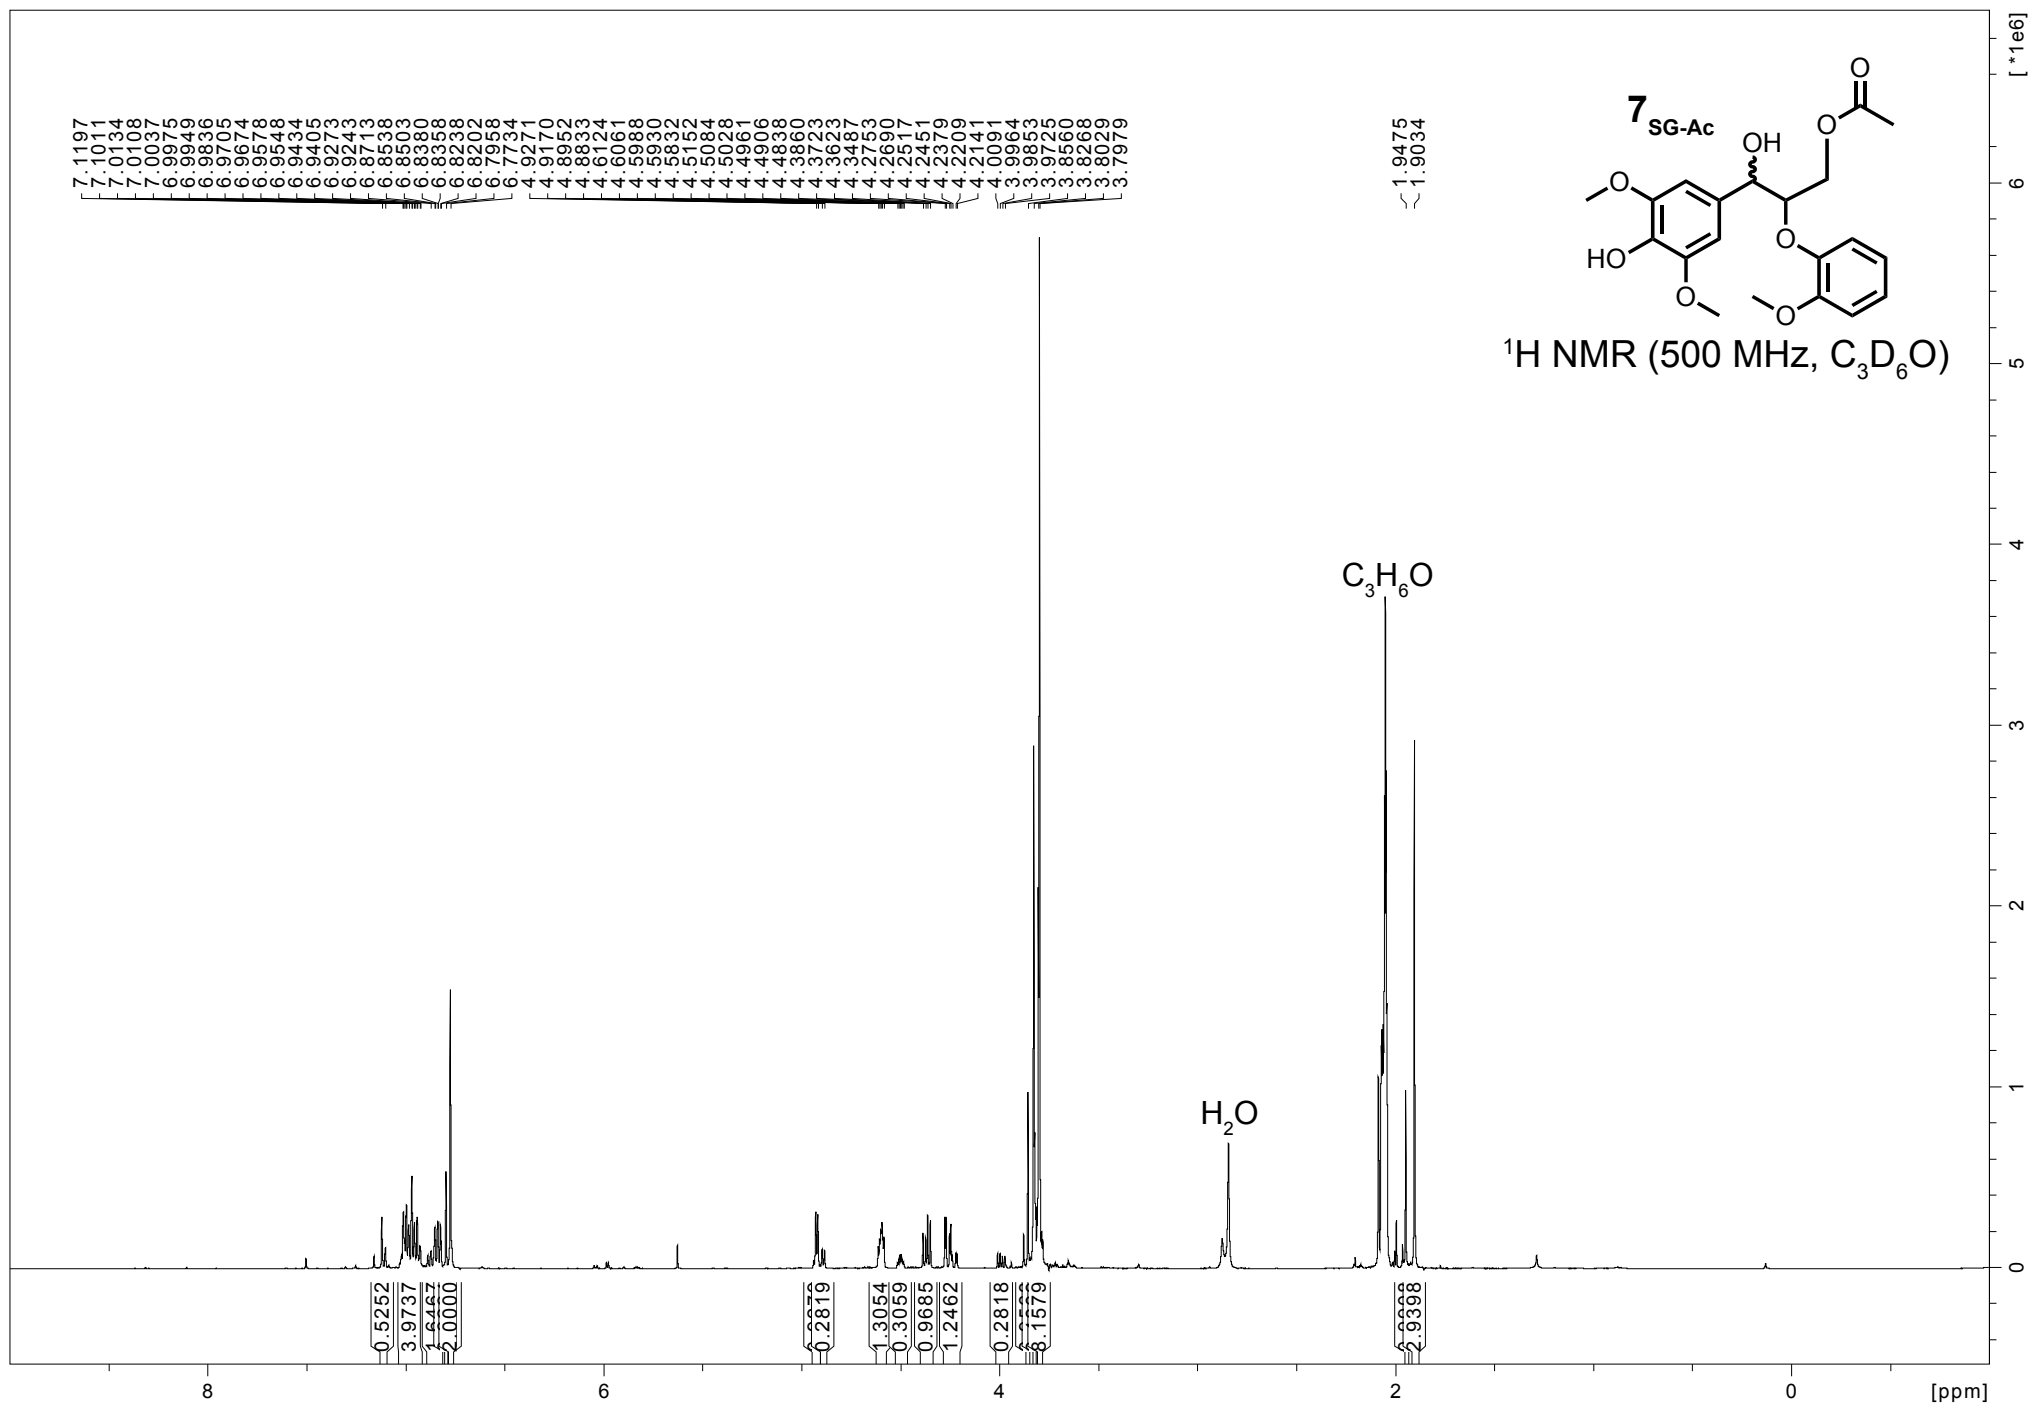



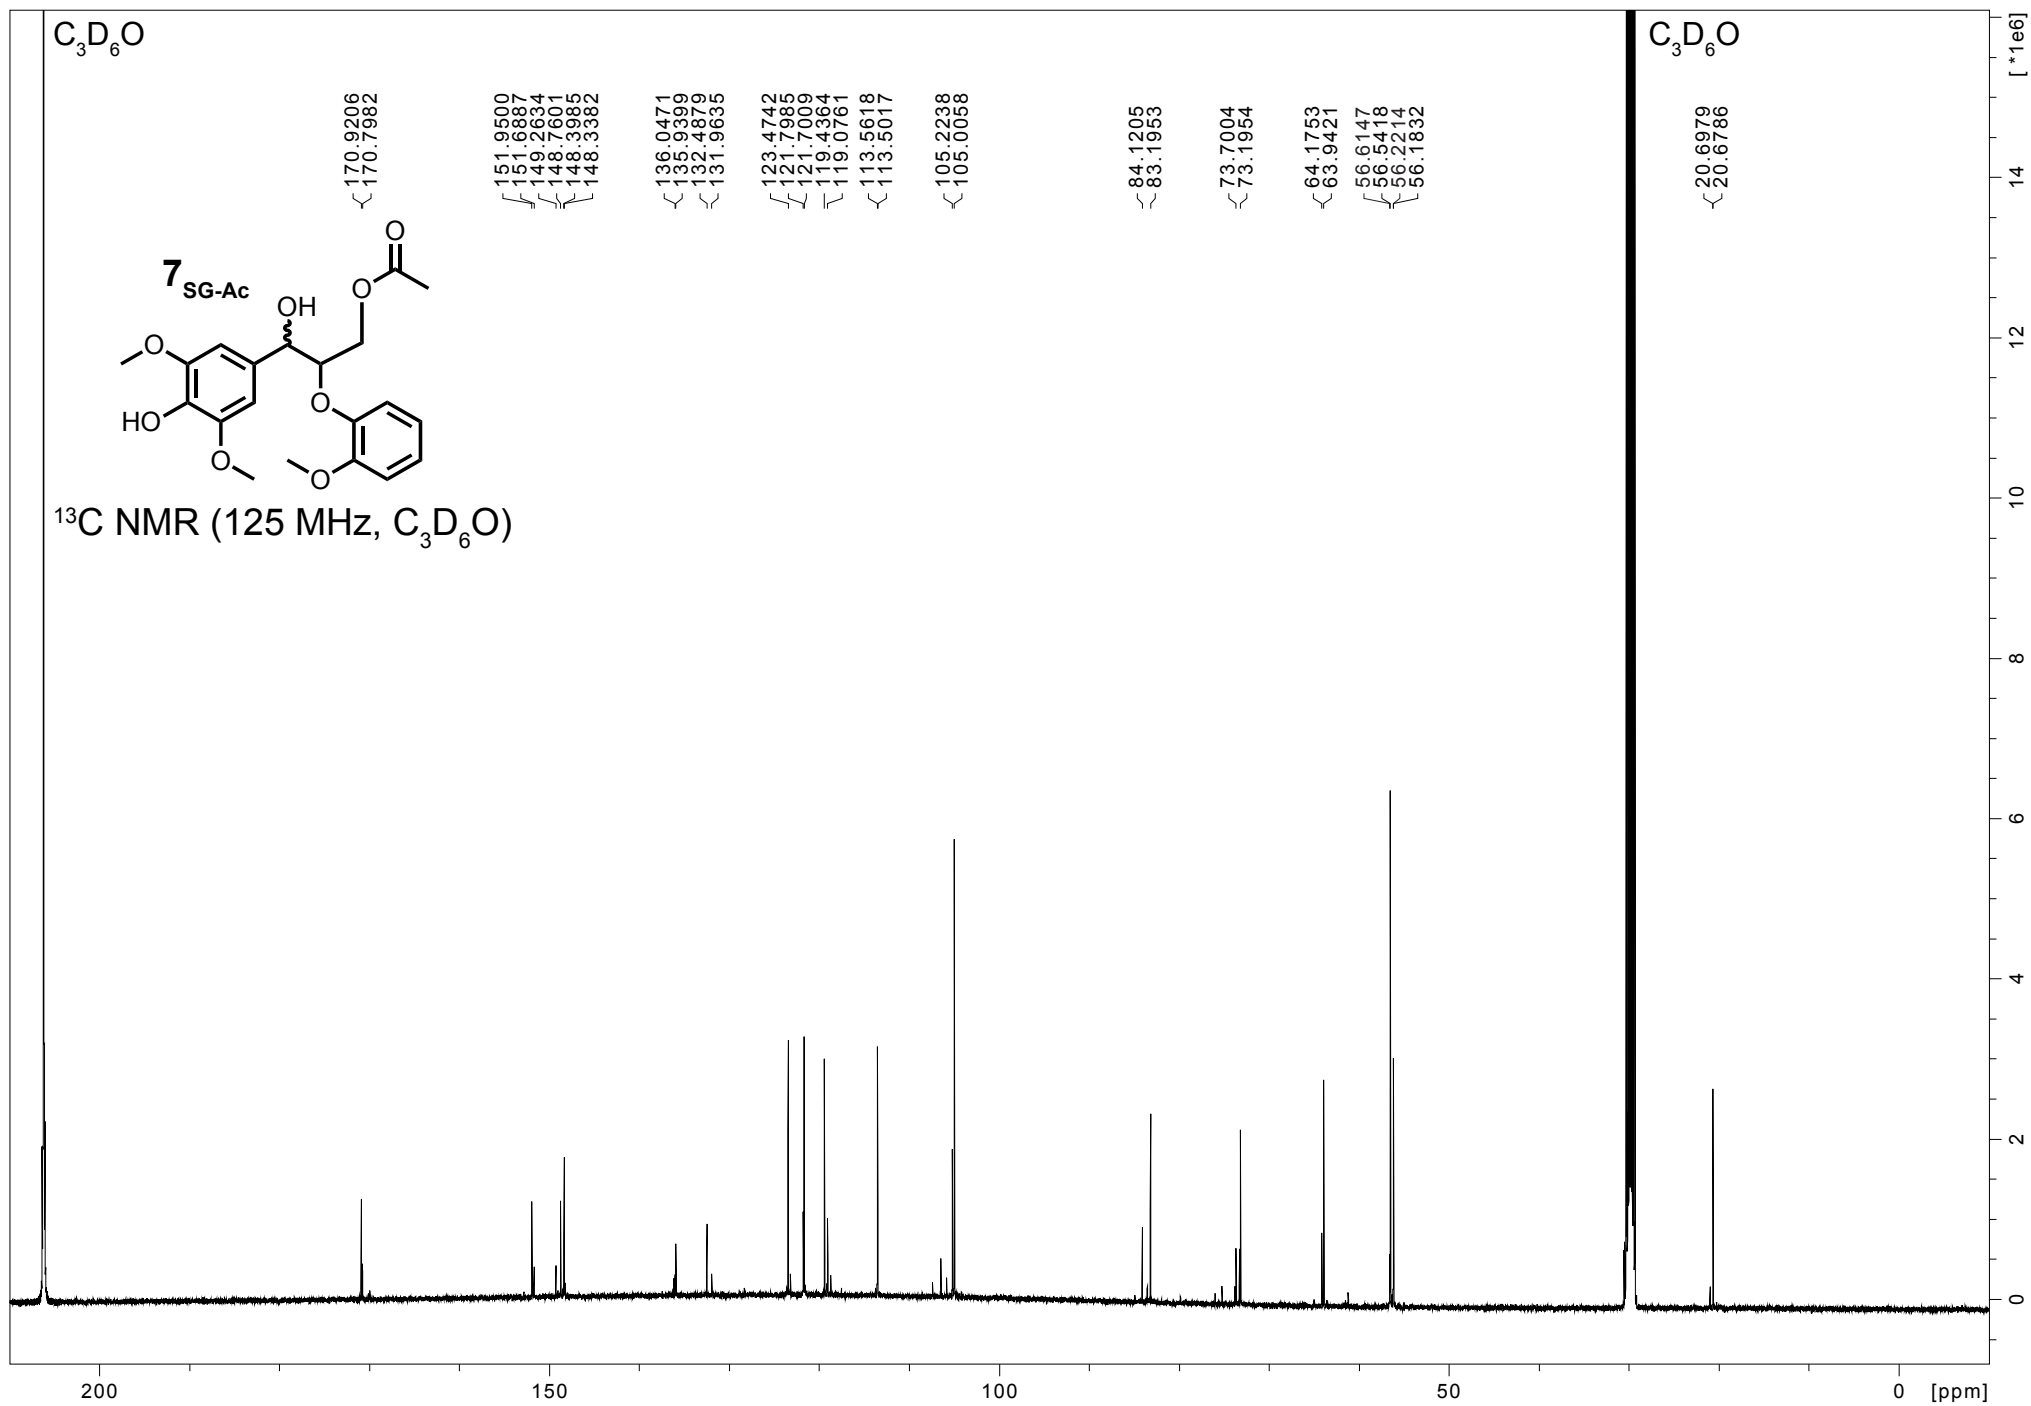

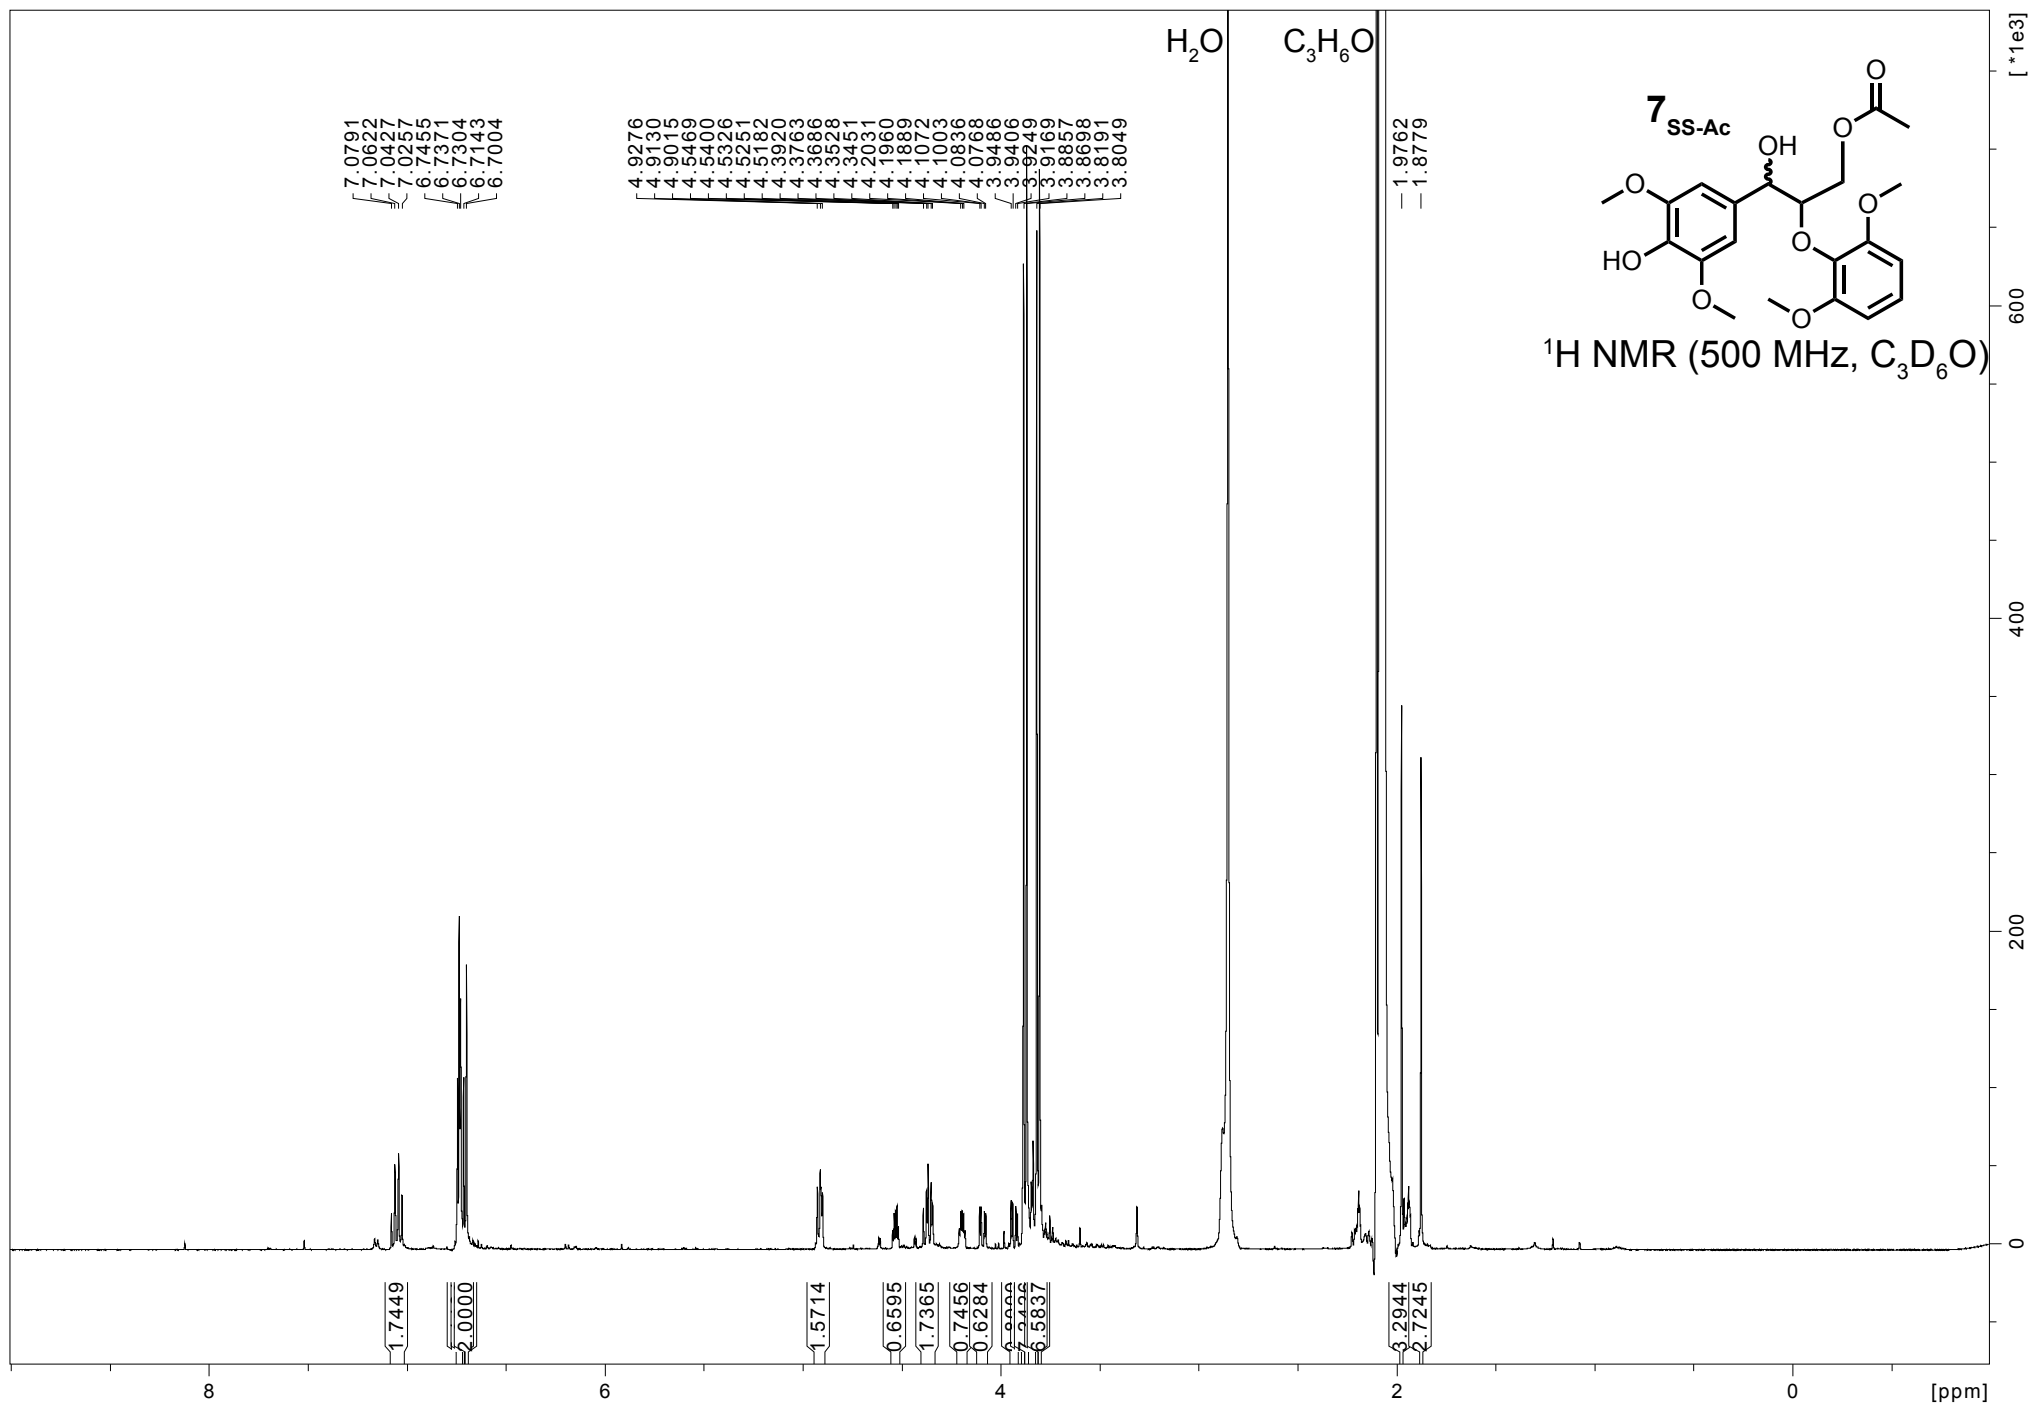

C<sub>3</sub>D<sub>6</sub>O

C<sub>3</sub>D<sub>6</sub>O

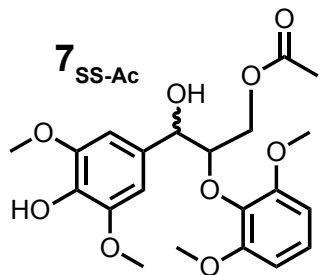

<sup>13</sup>C NMR (125 MHz, C<sub>3</sub>D<sub>6</sub>O)

170.8193  
170.7425

154.5259  
153.9651  
148.4248  
148.3135

137.8024  
136.9652  
135.7418  
131.9062  
131.4477

124.8236  
124.7423

106.3622  
106.3311  
105.2284  
104.3479

86.6218  
84.1062

74.5057  
72.8167

64.6900  
63.4305

56.5393  
56.5156  
56.4920  
56.4279

20.7088  
20.6682

200

150

100

50

0 [ppm]

[\*1e6]

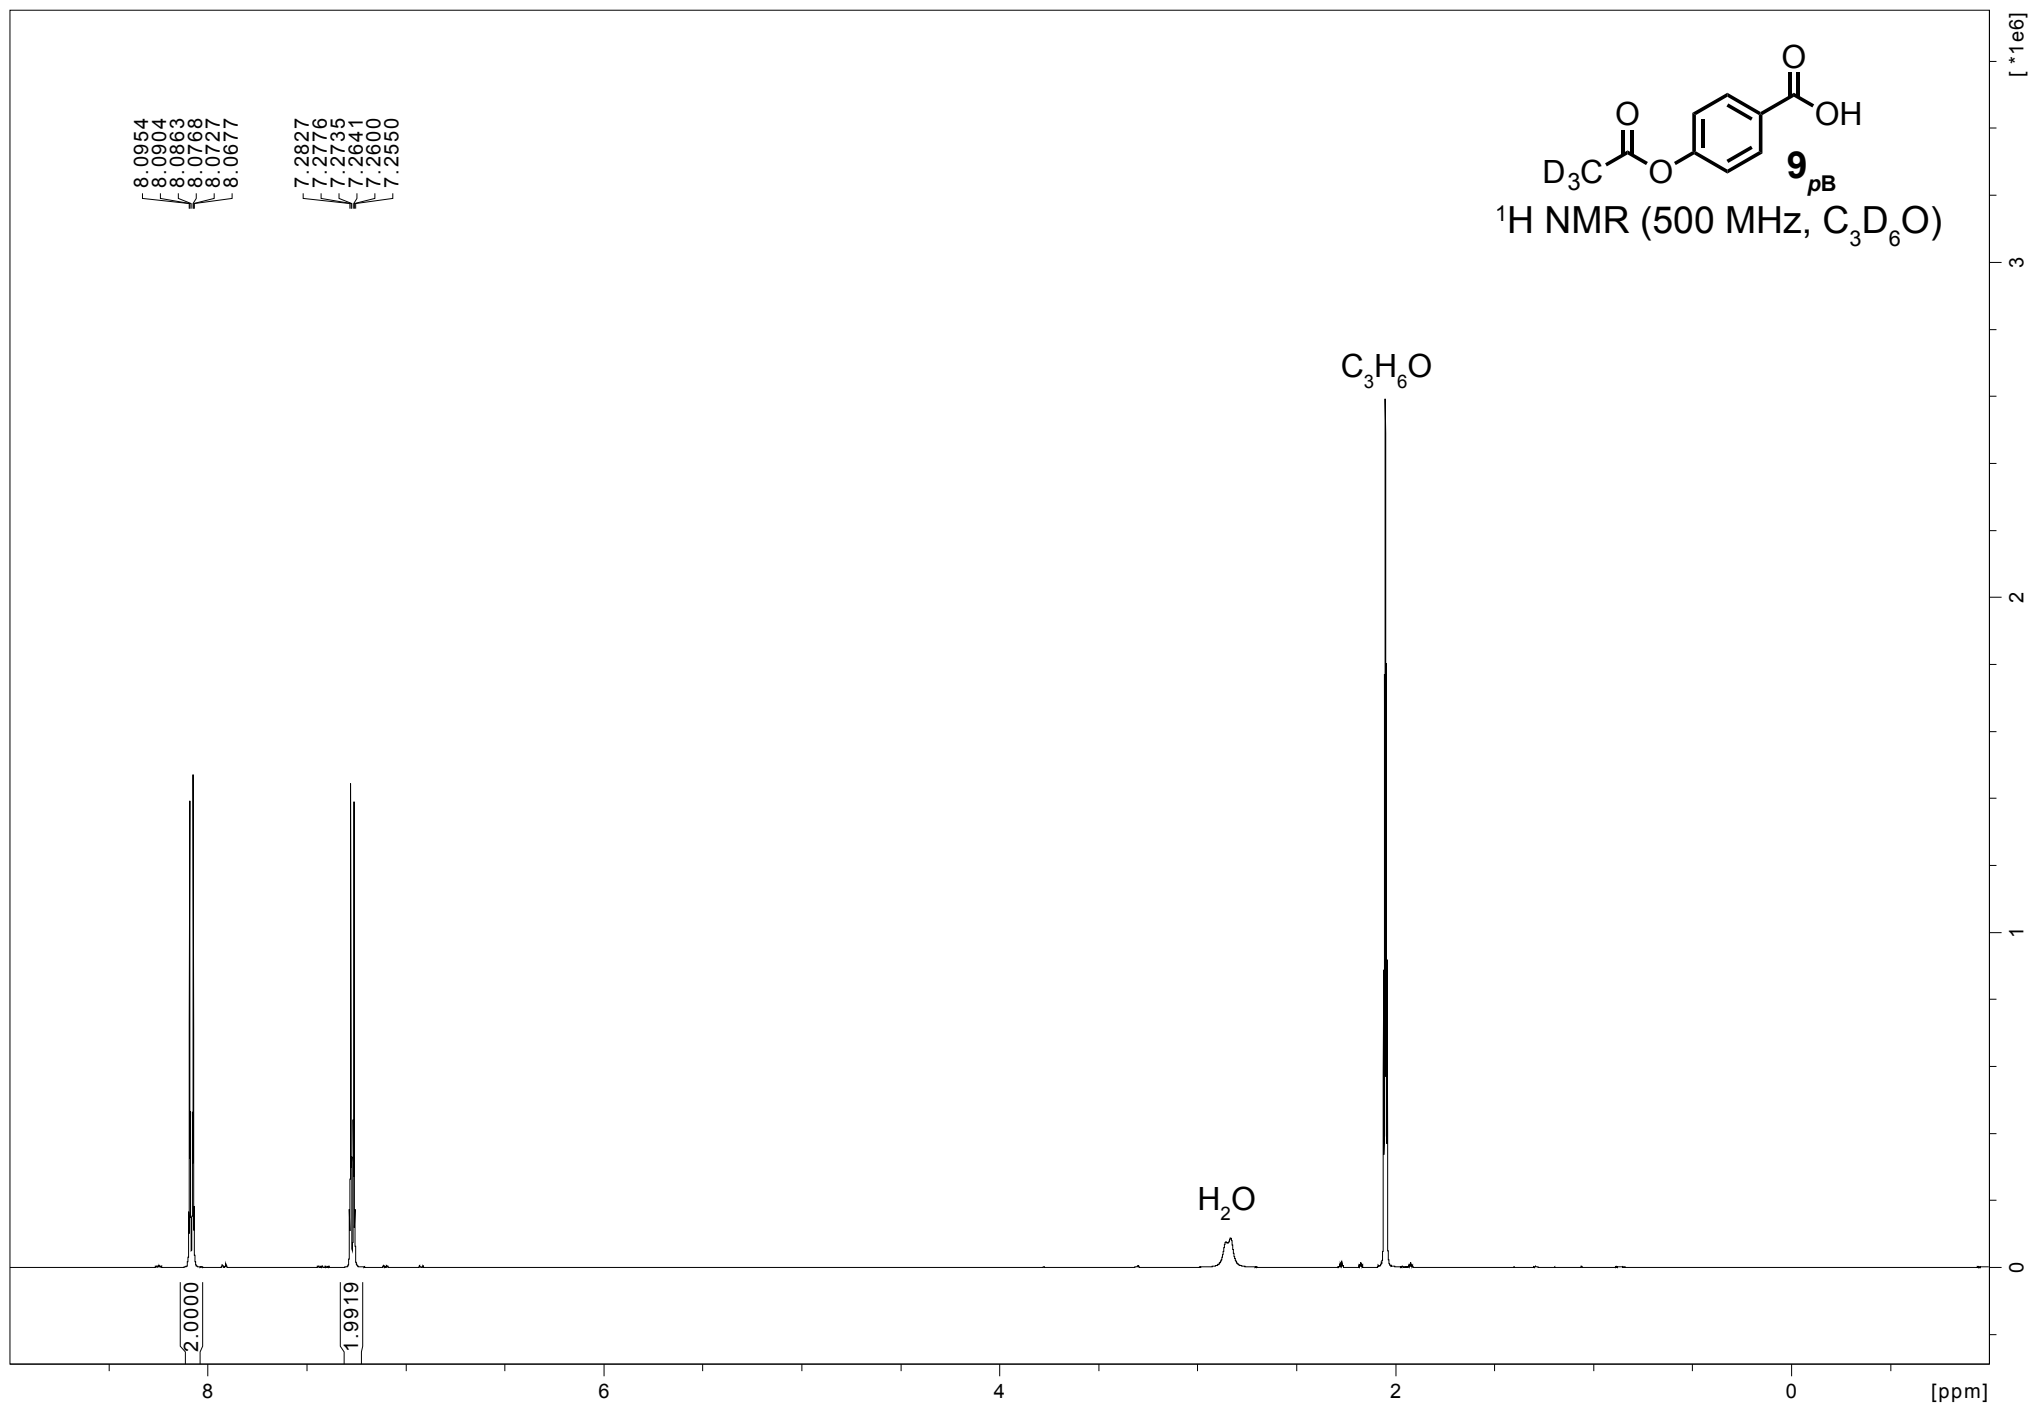

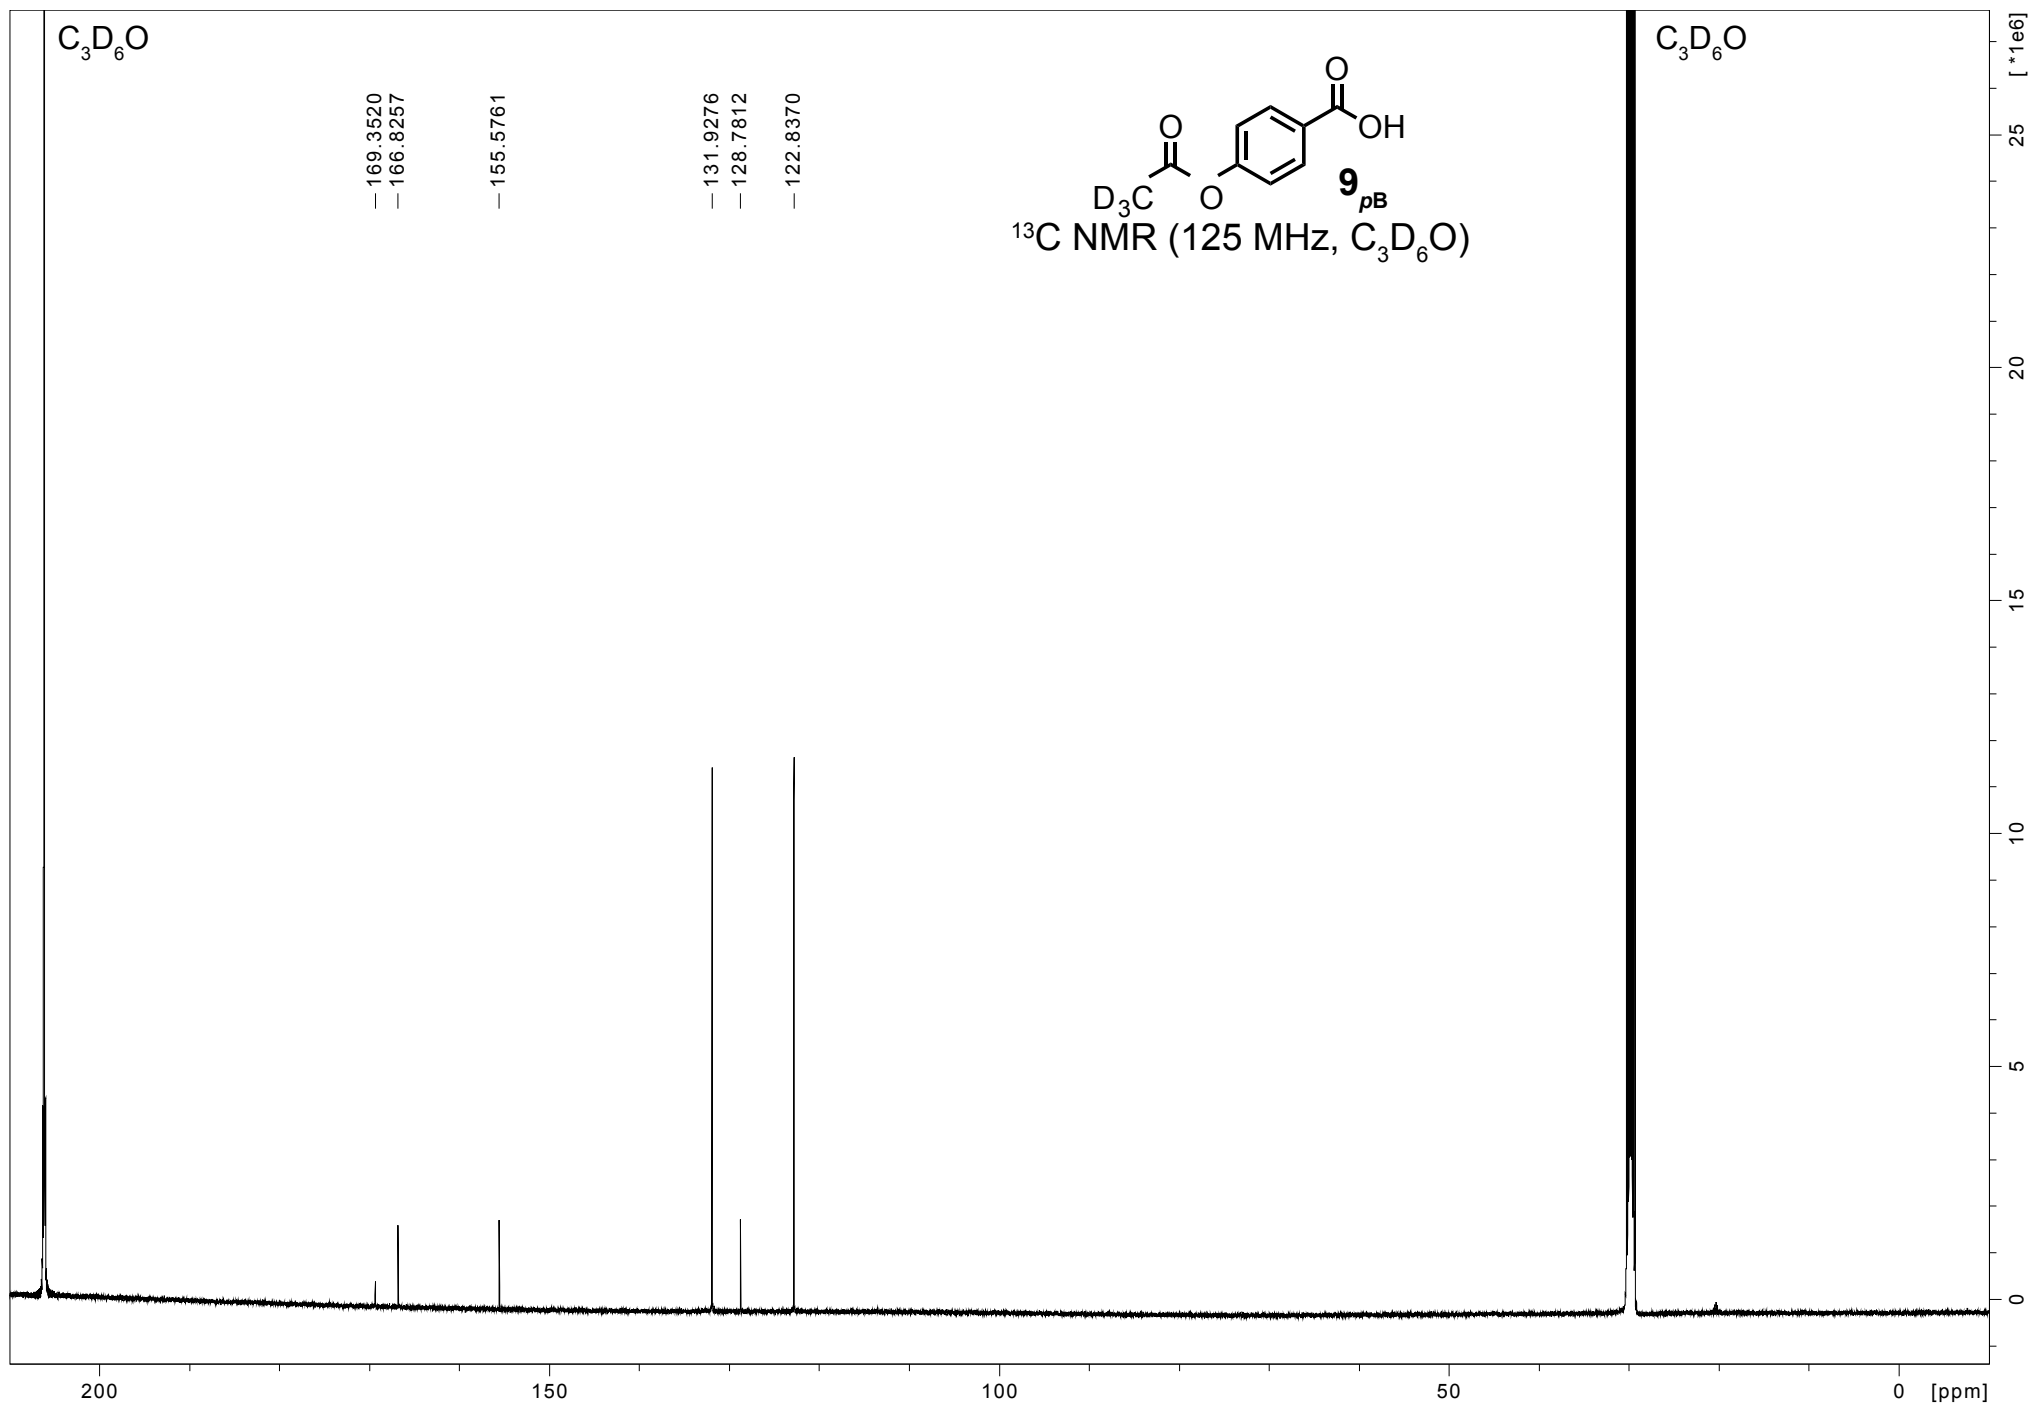

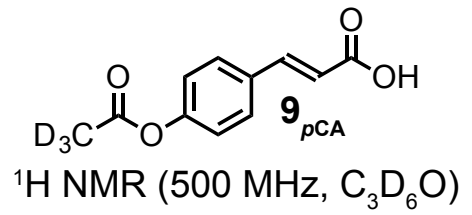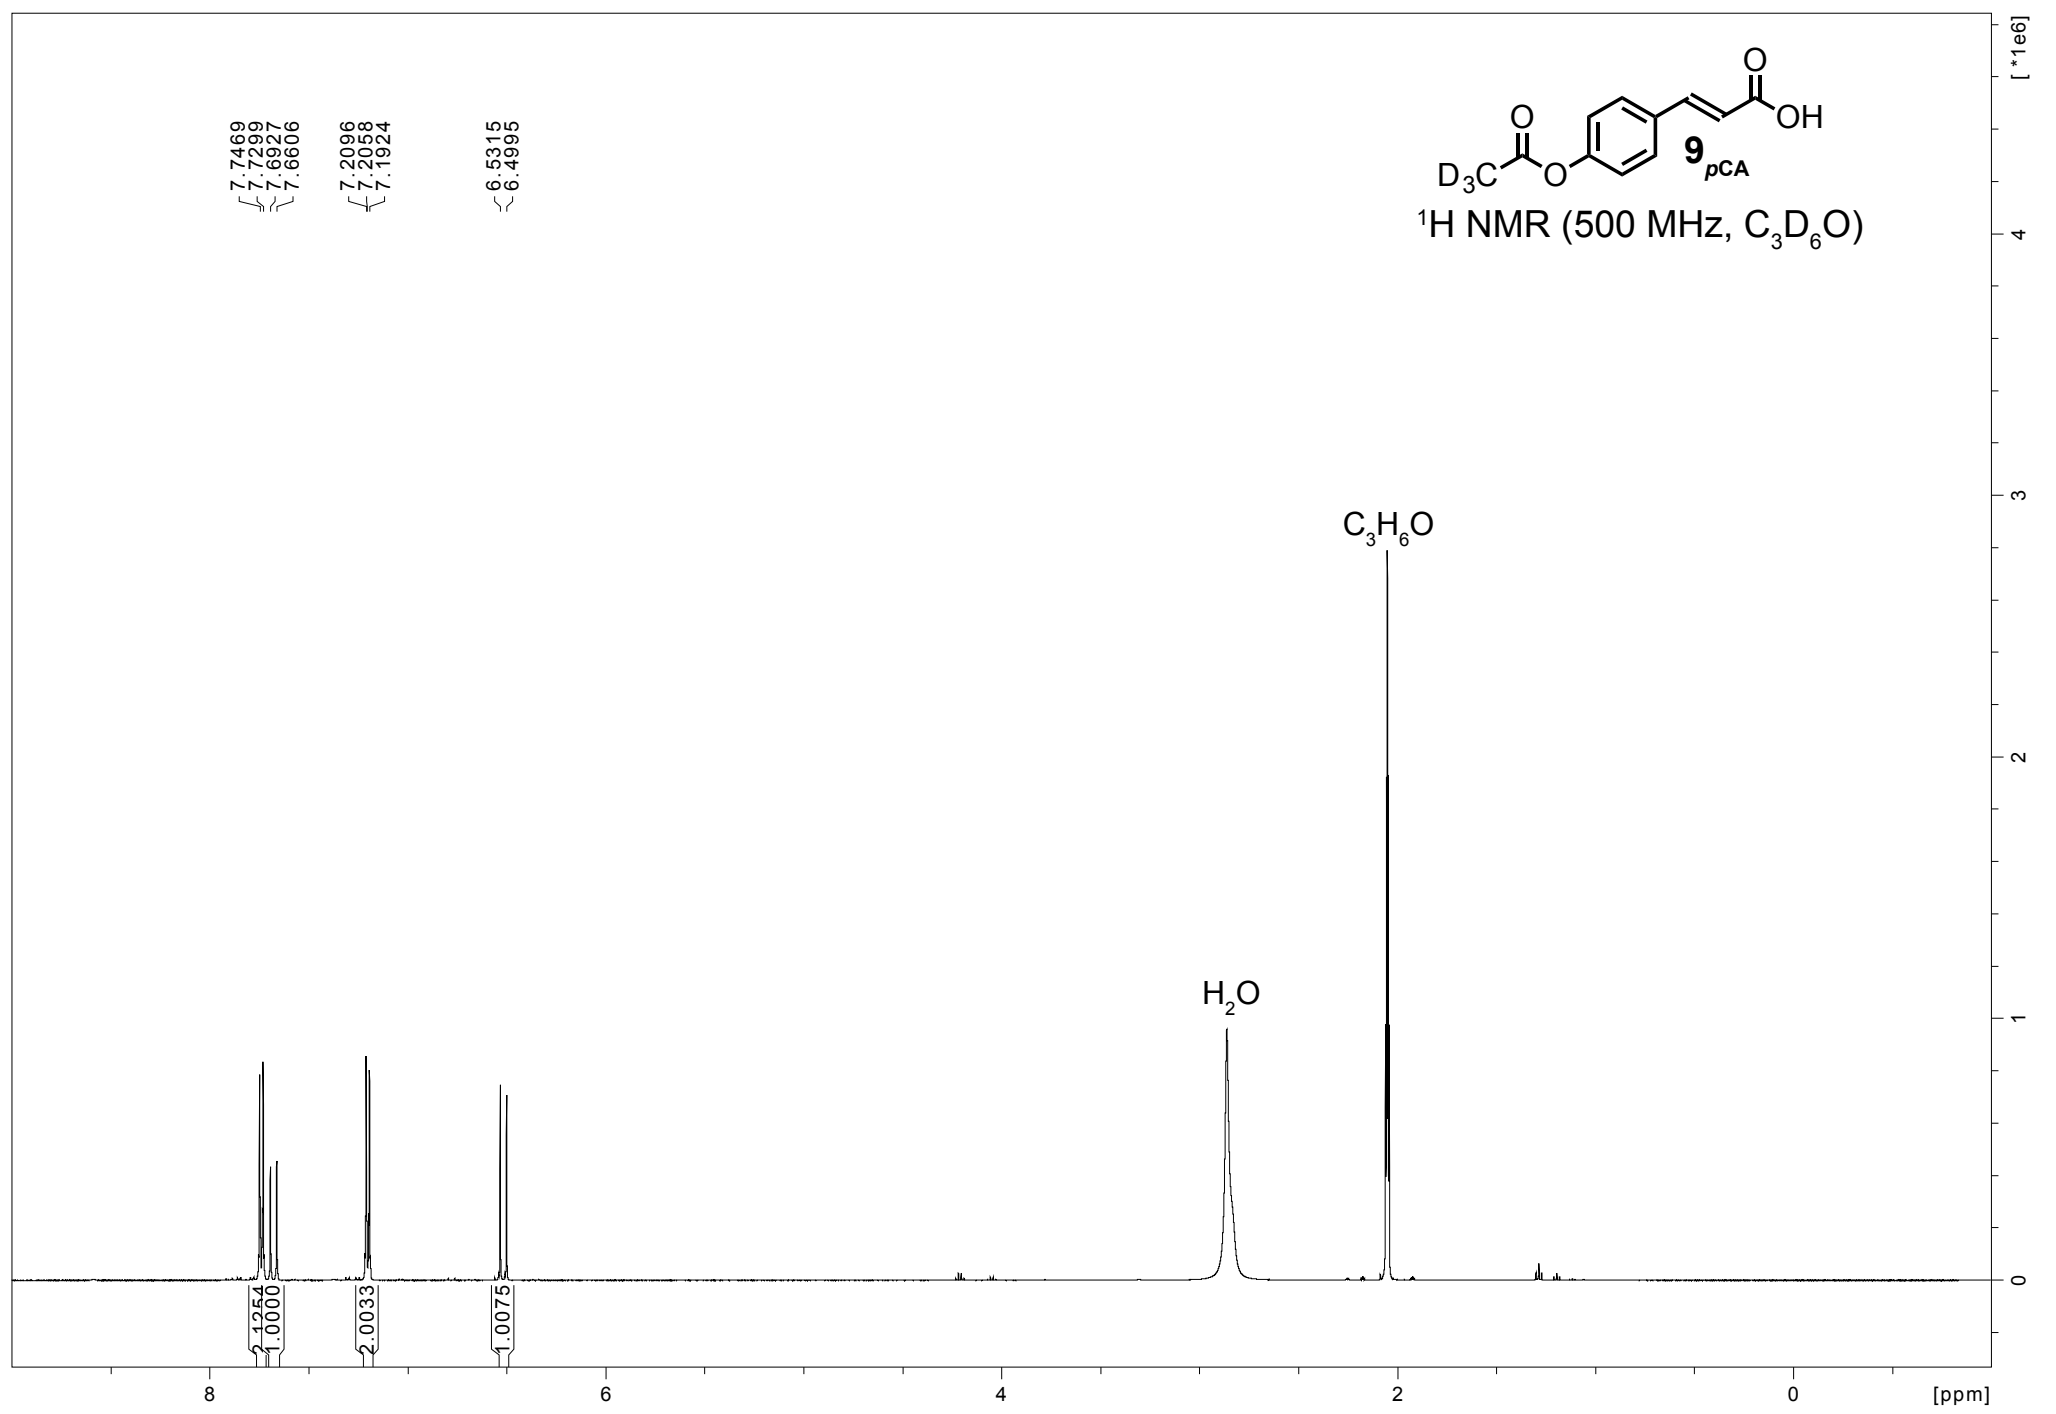

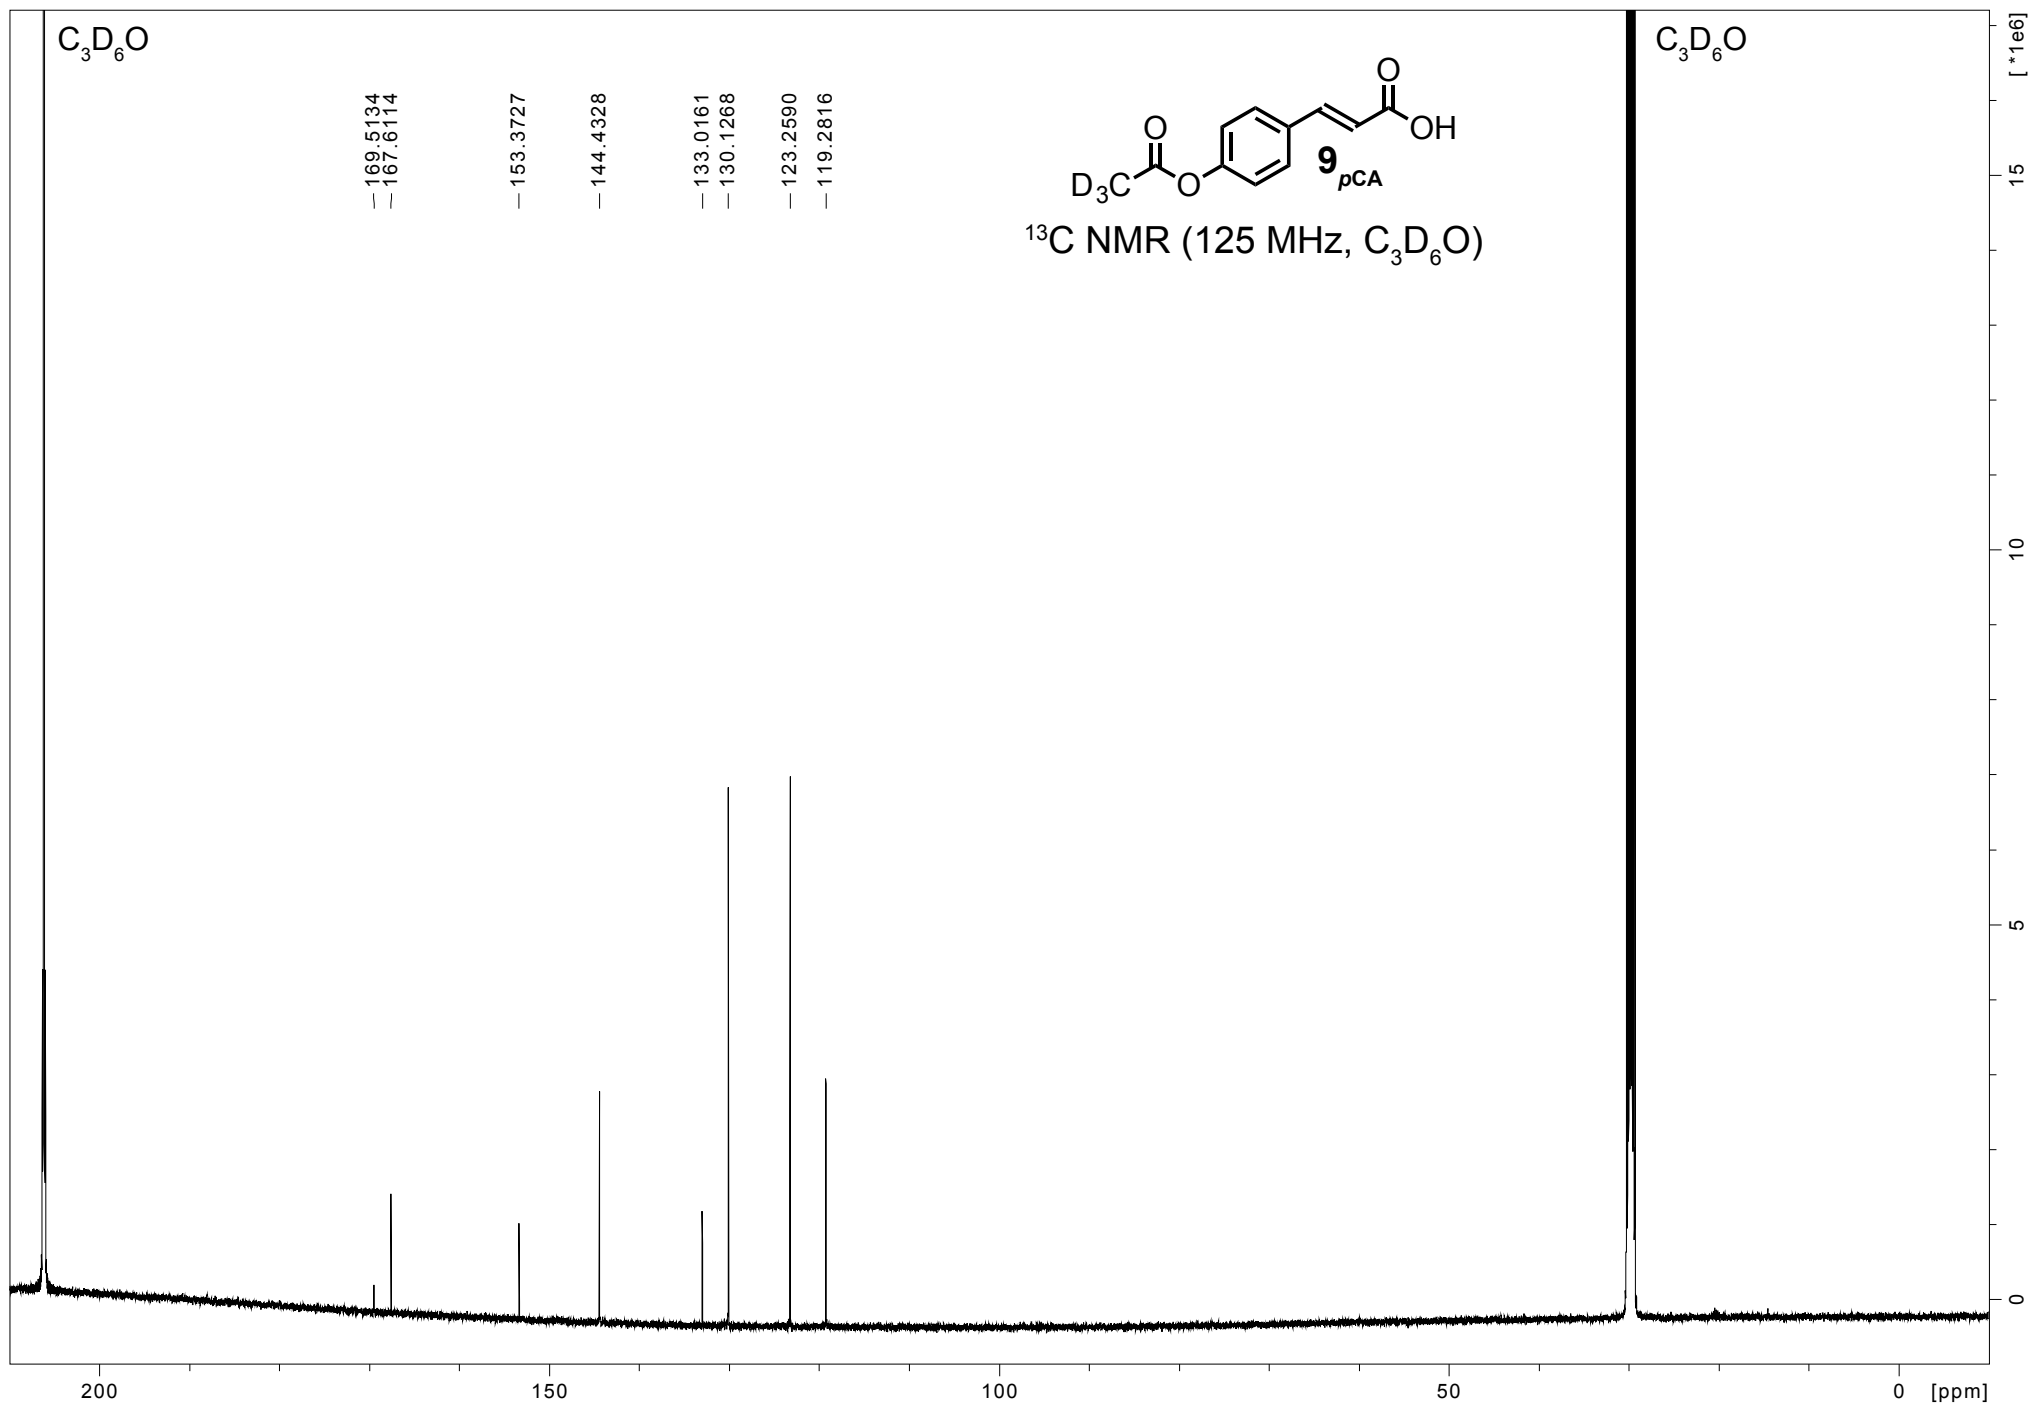

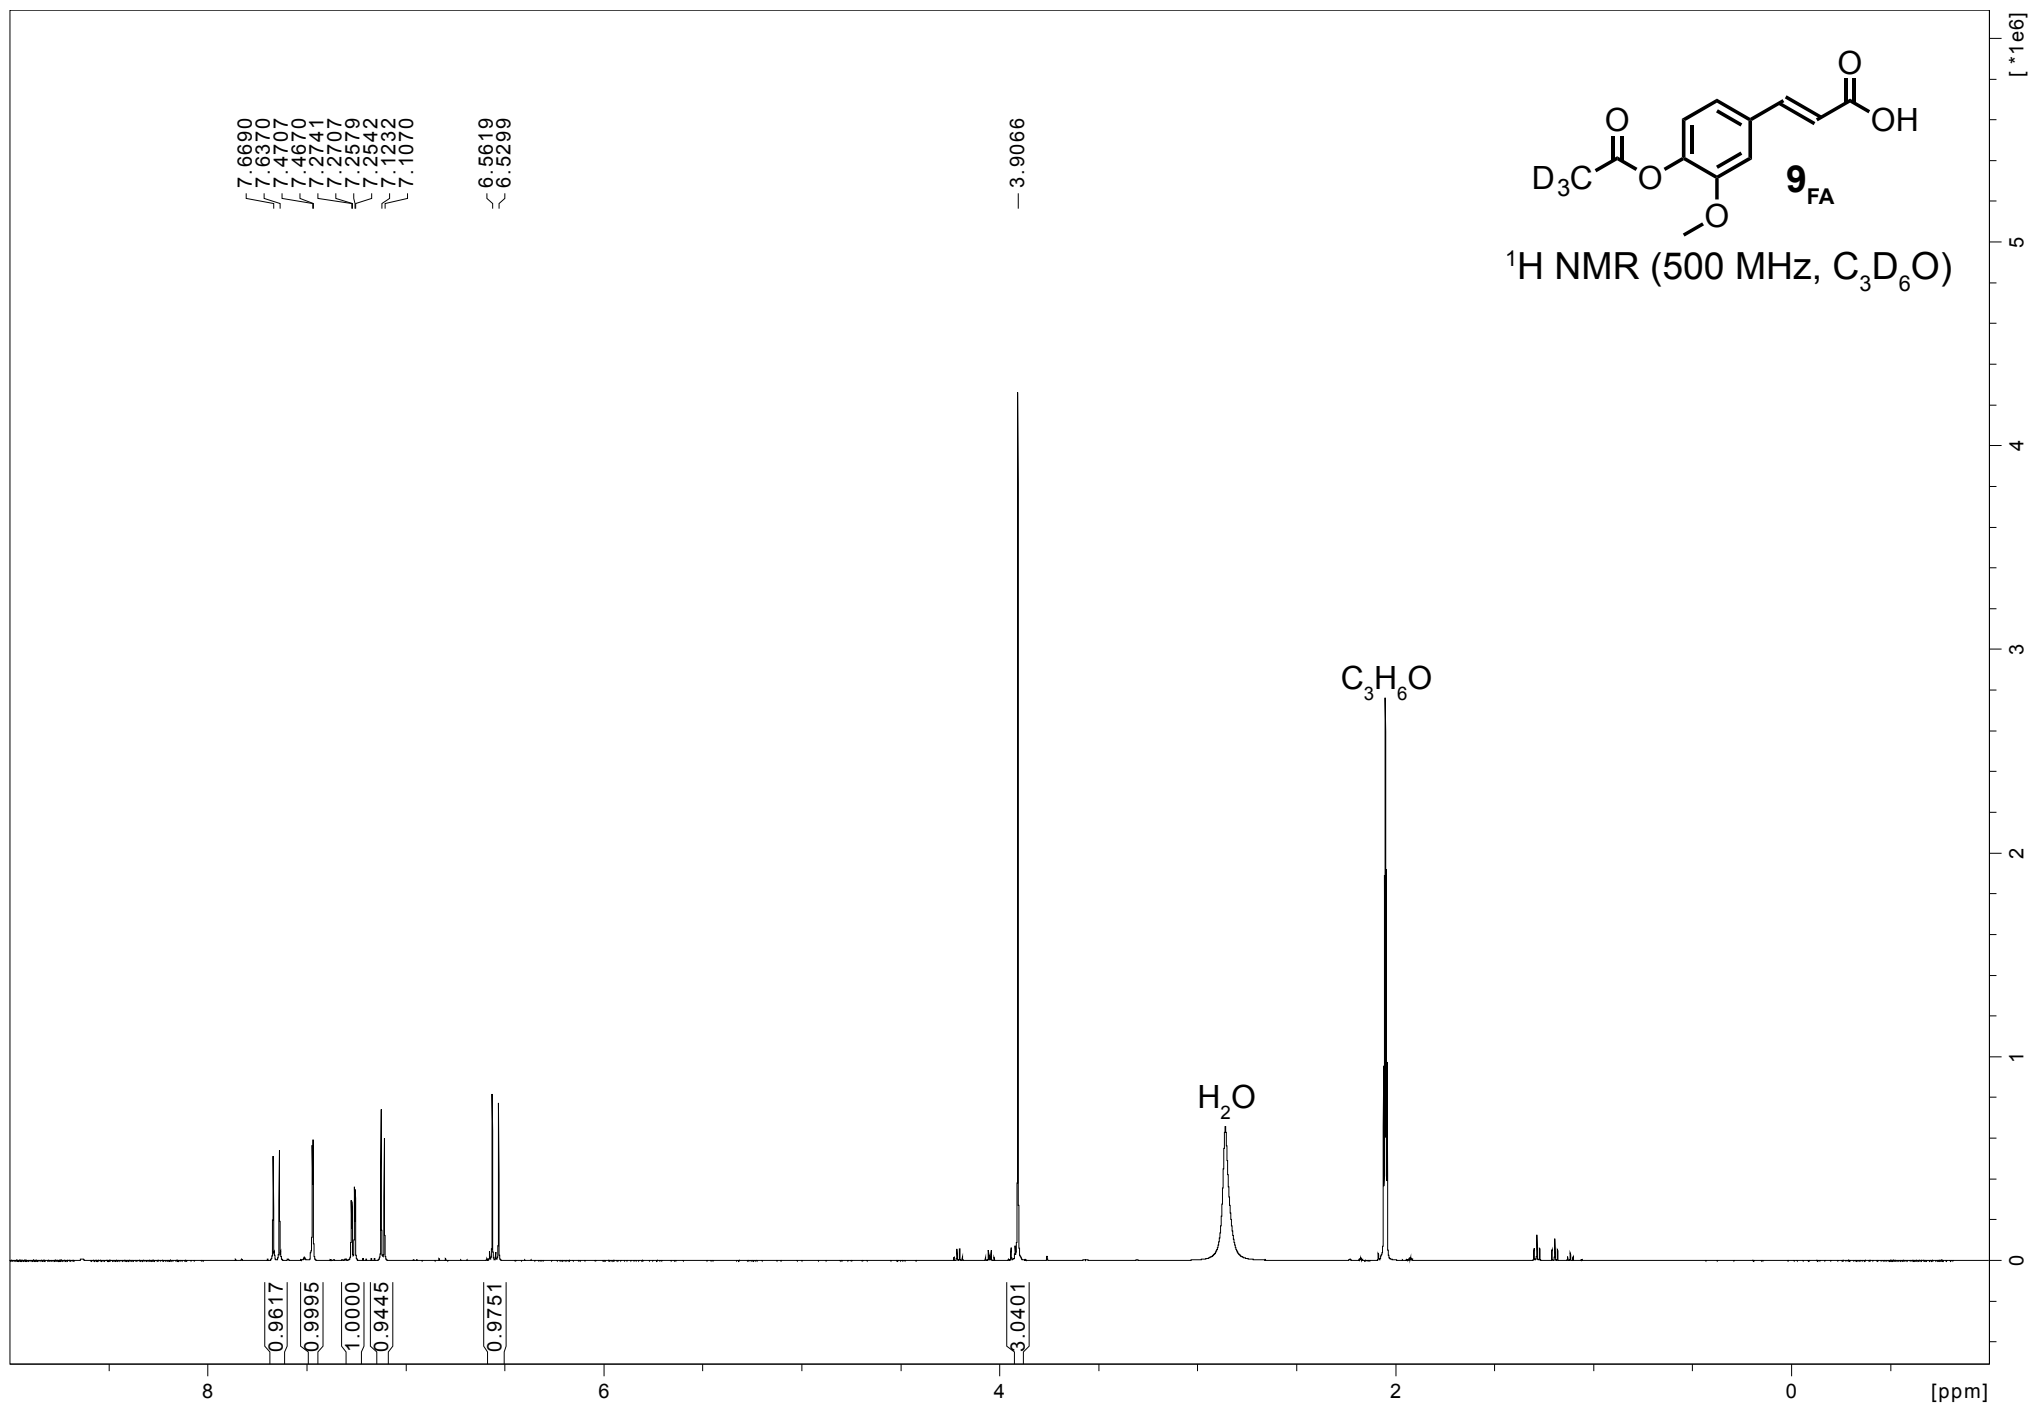



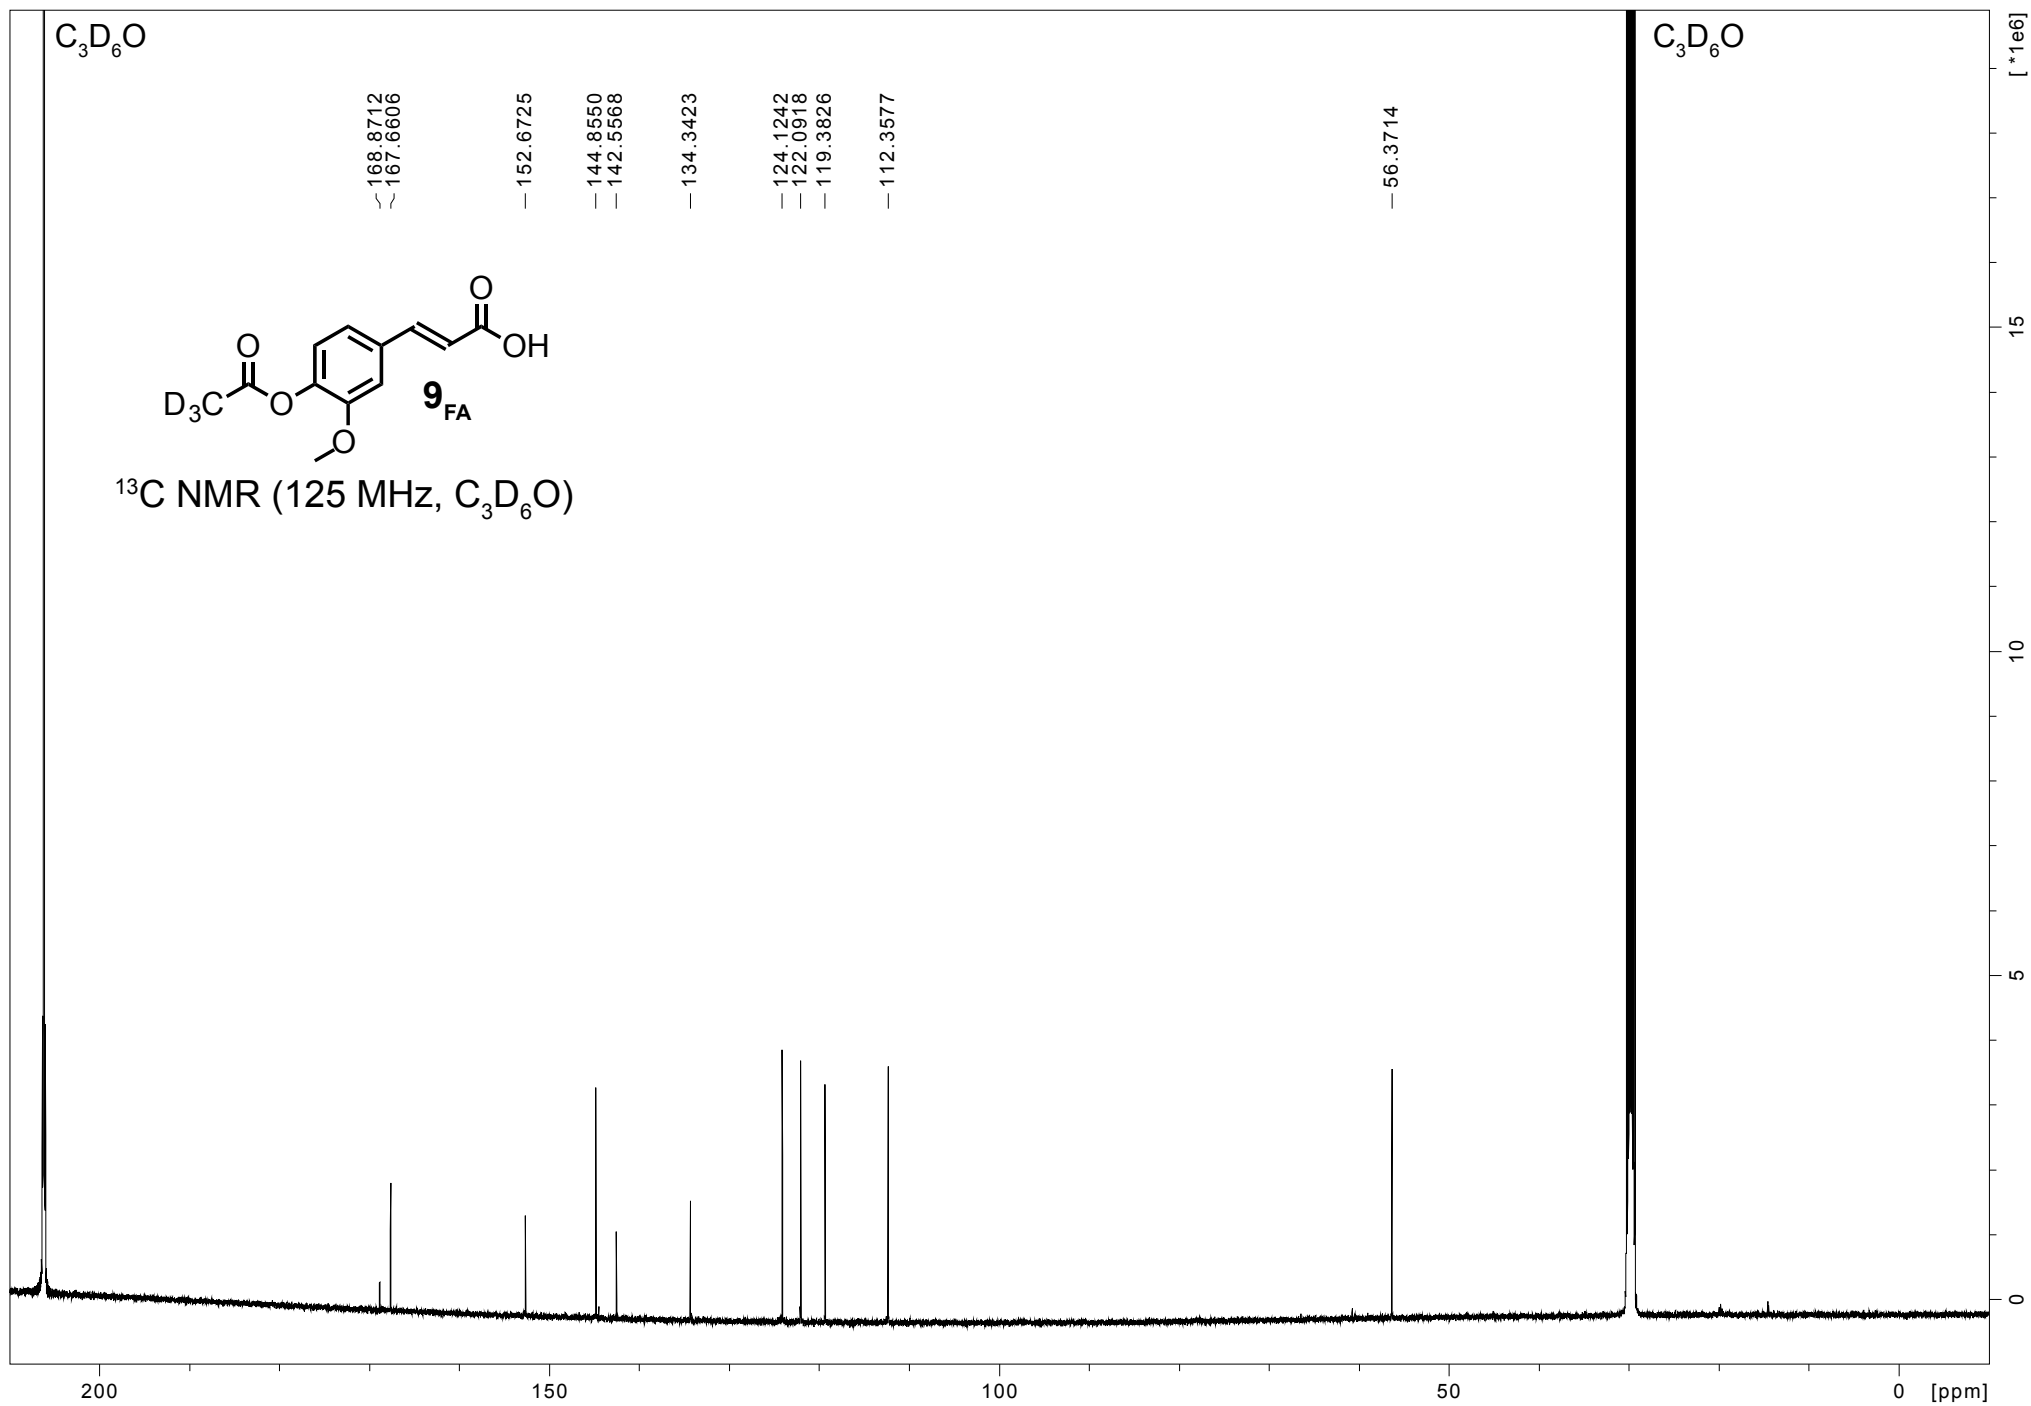

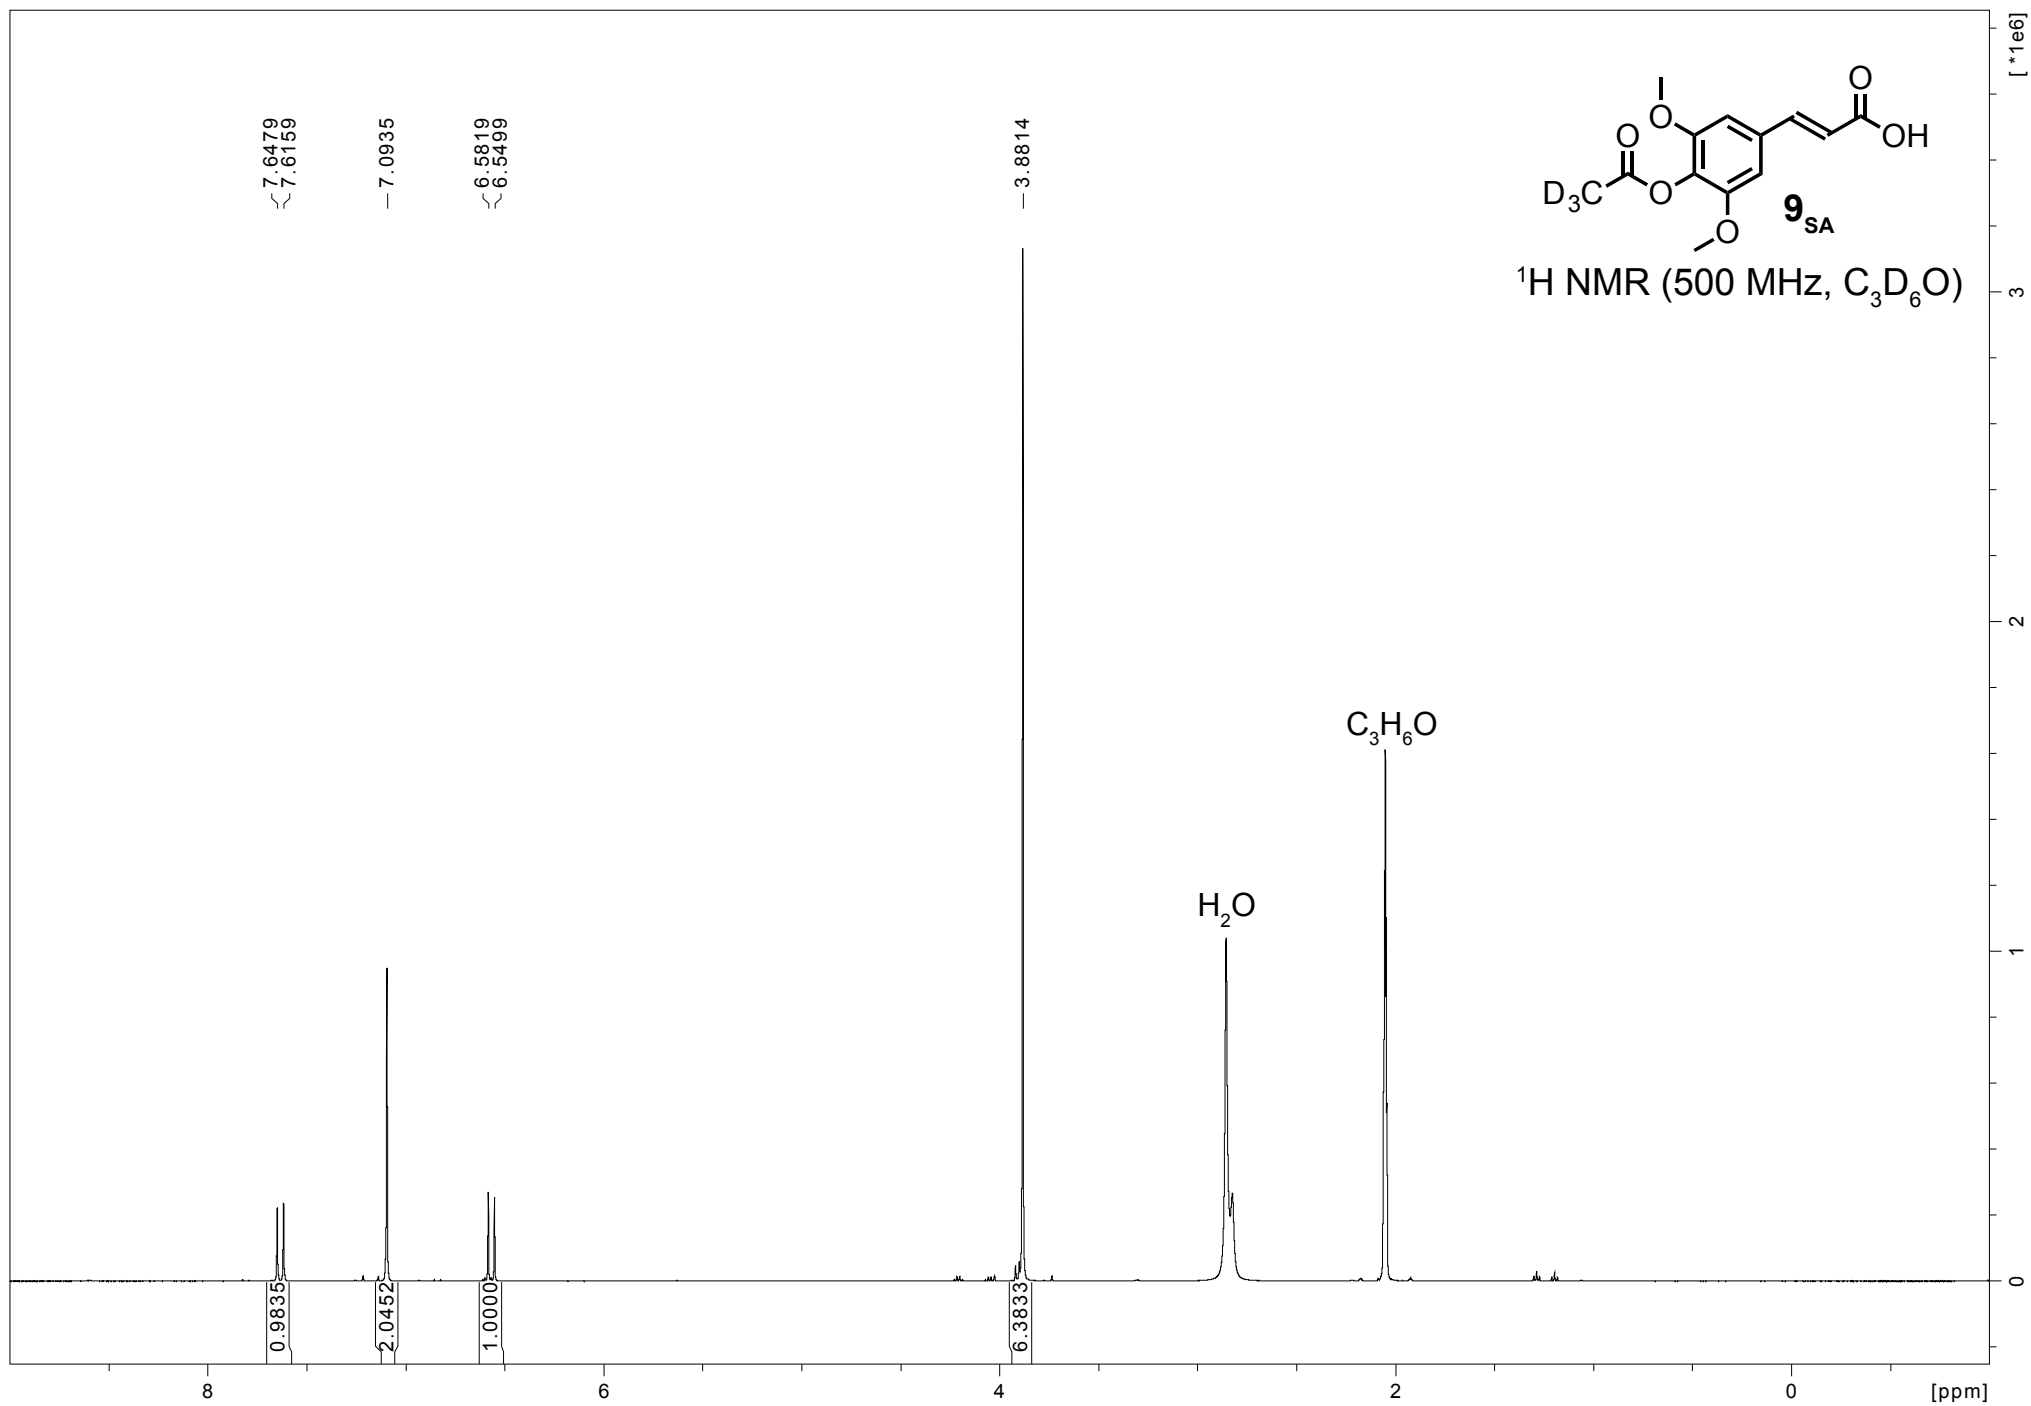

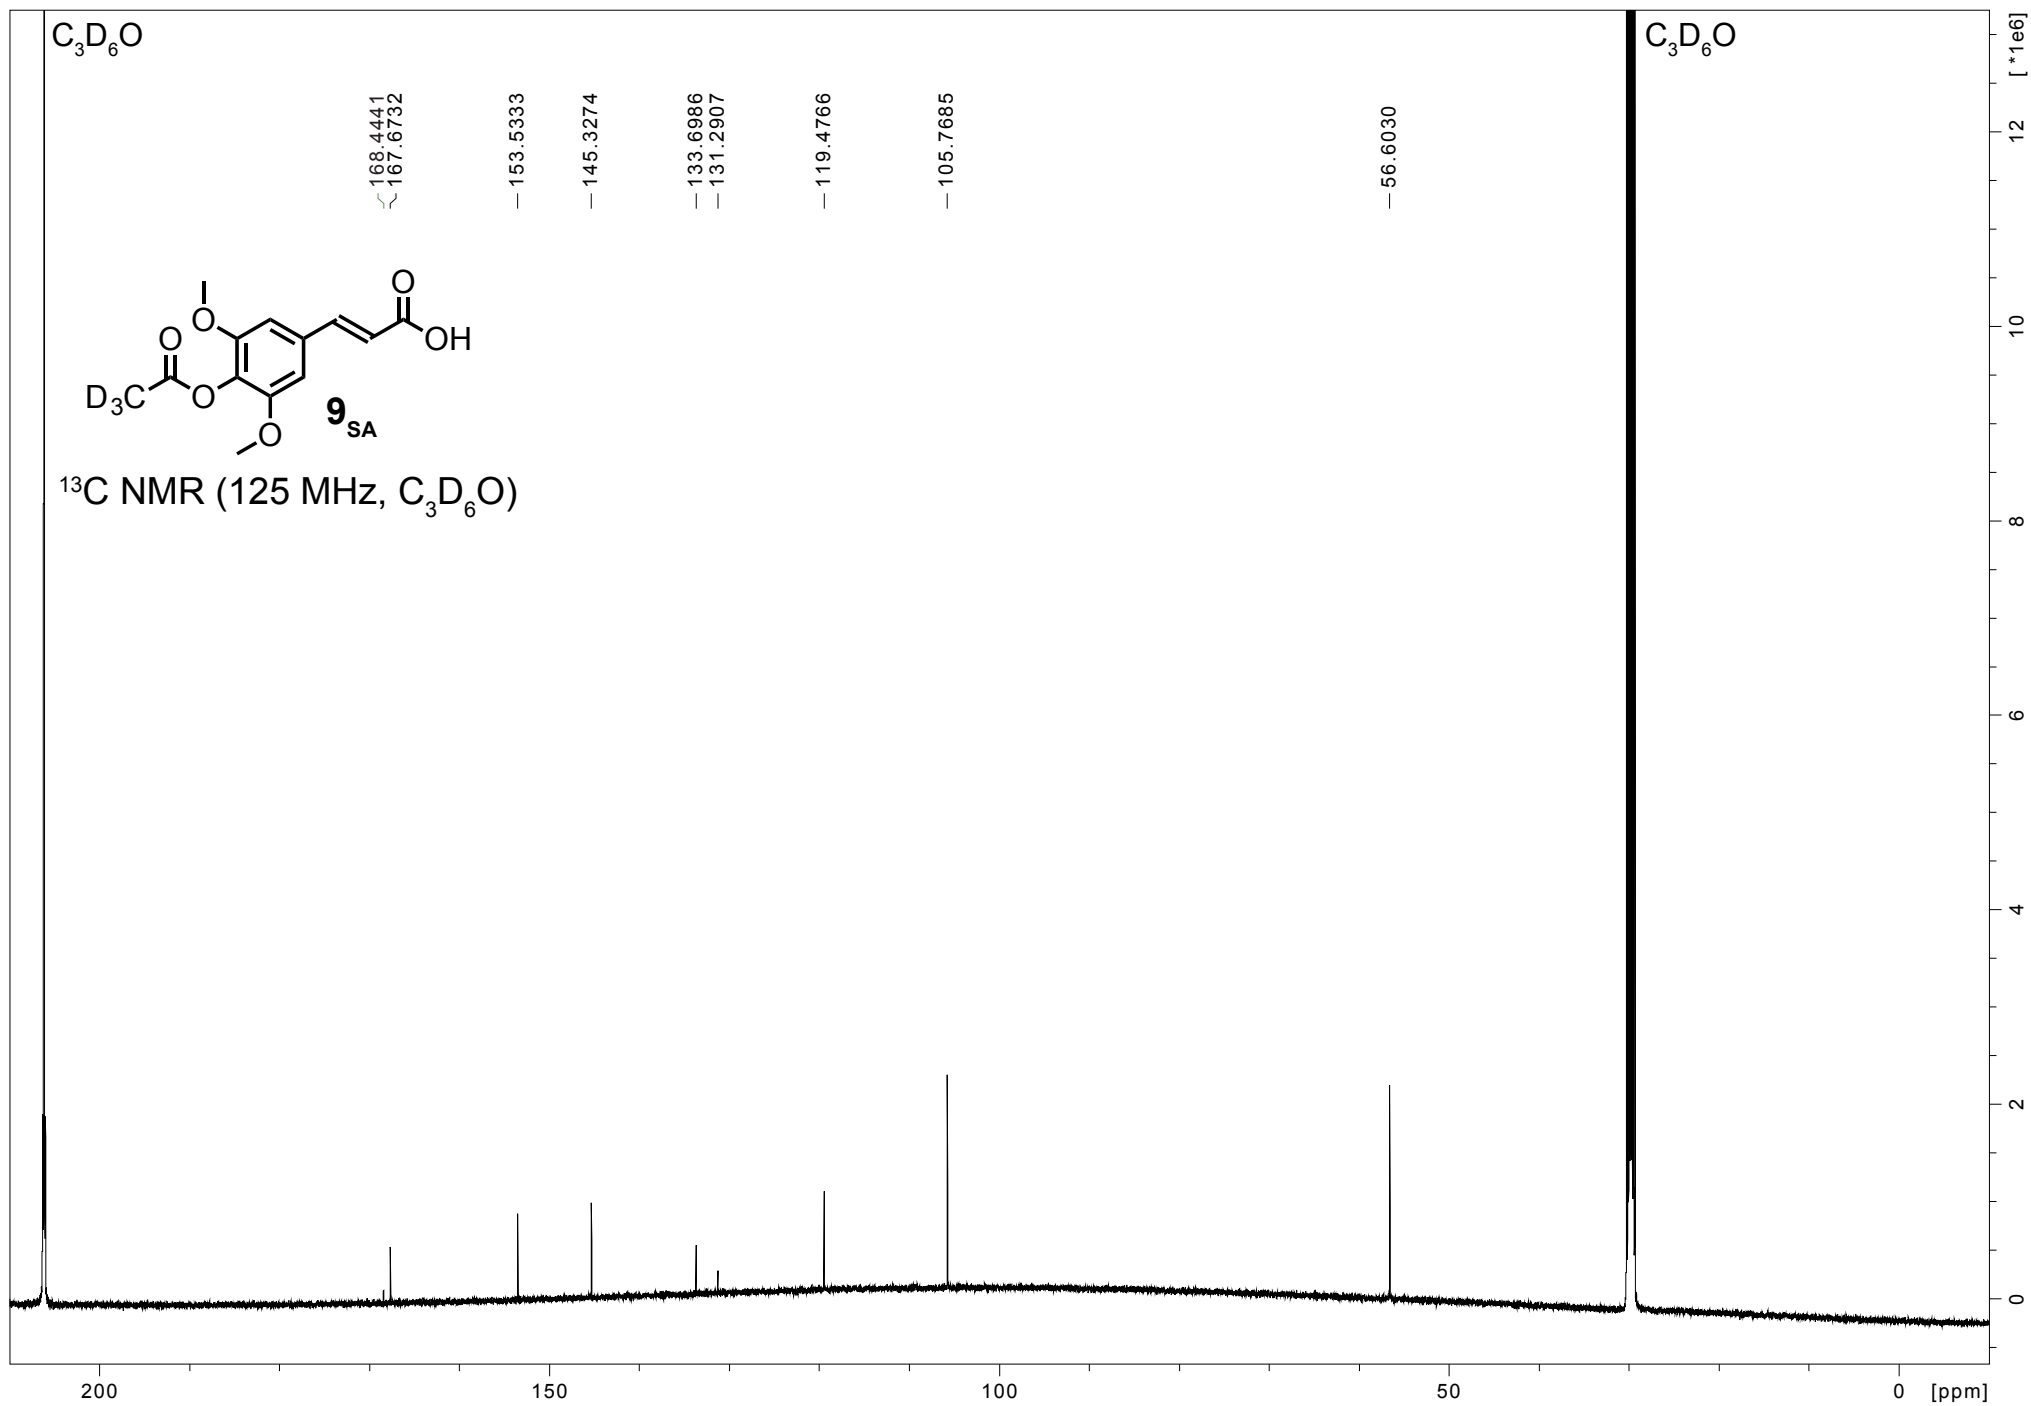

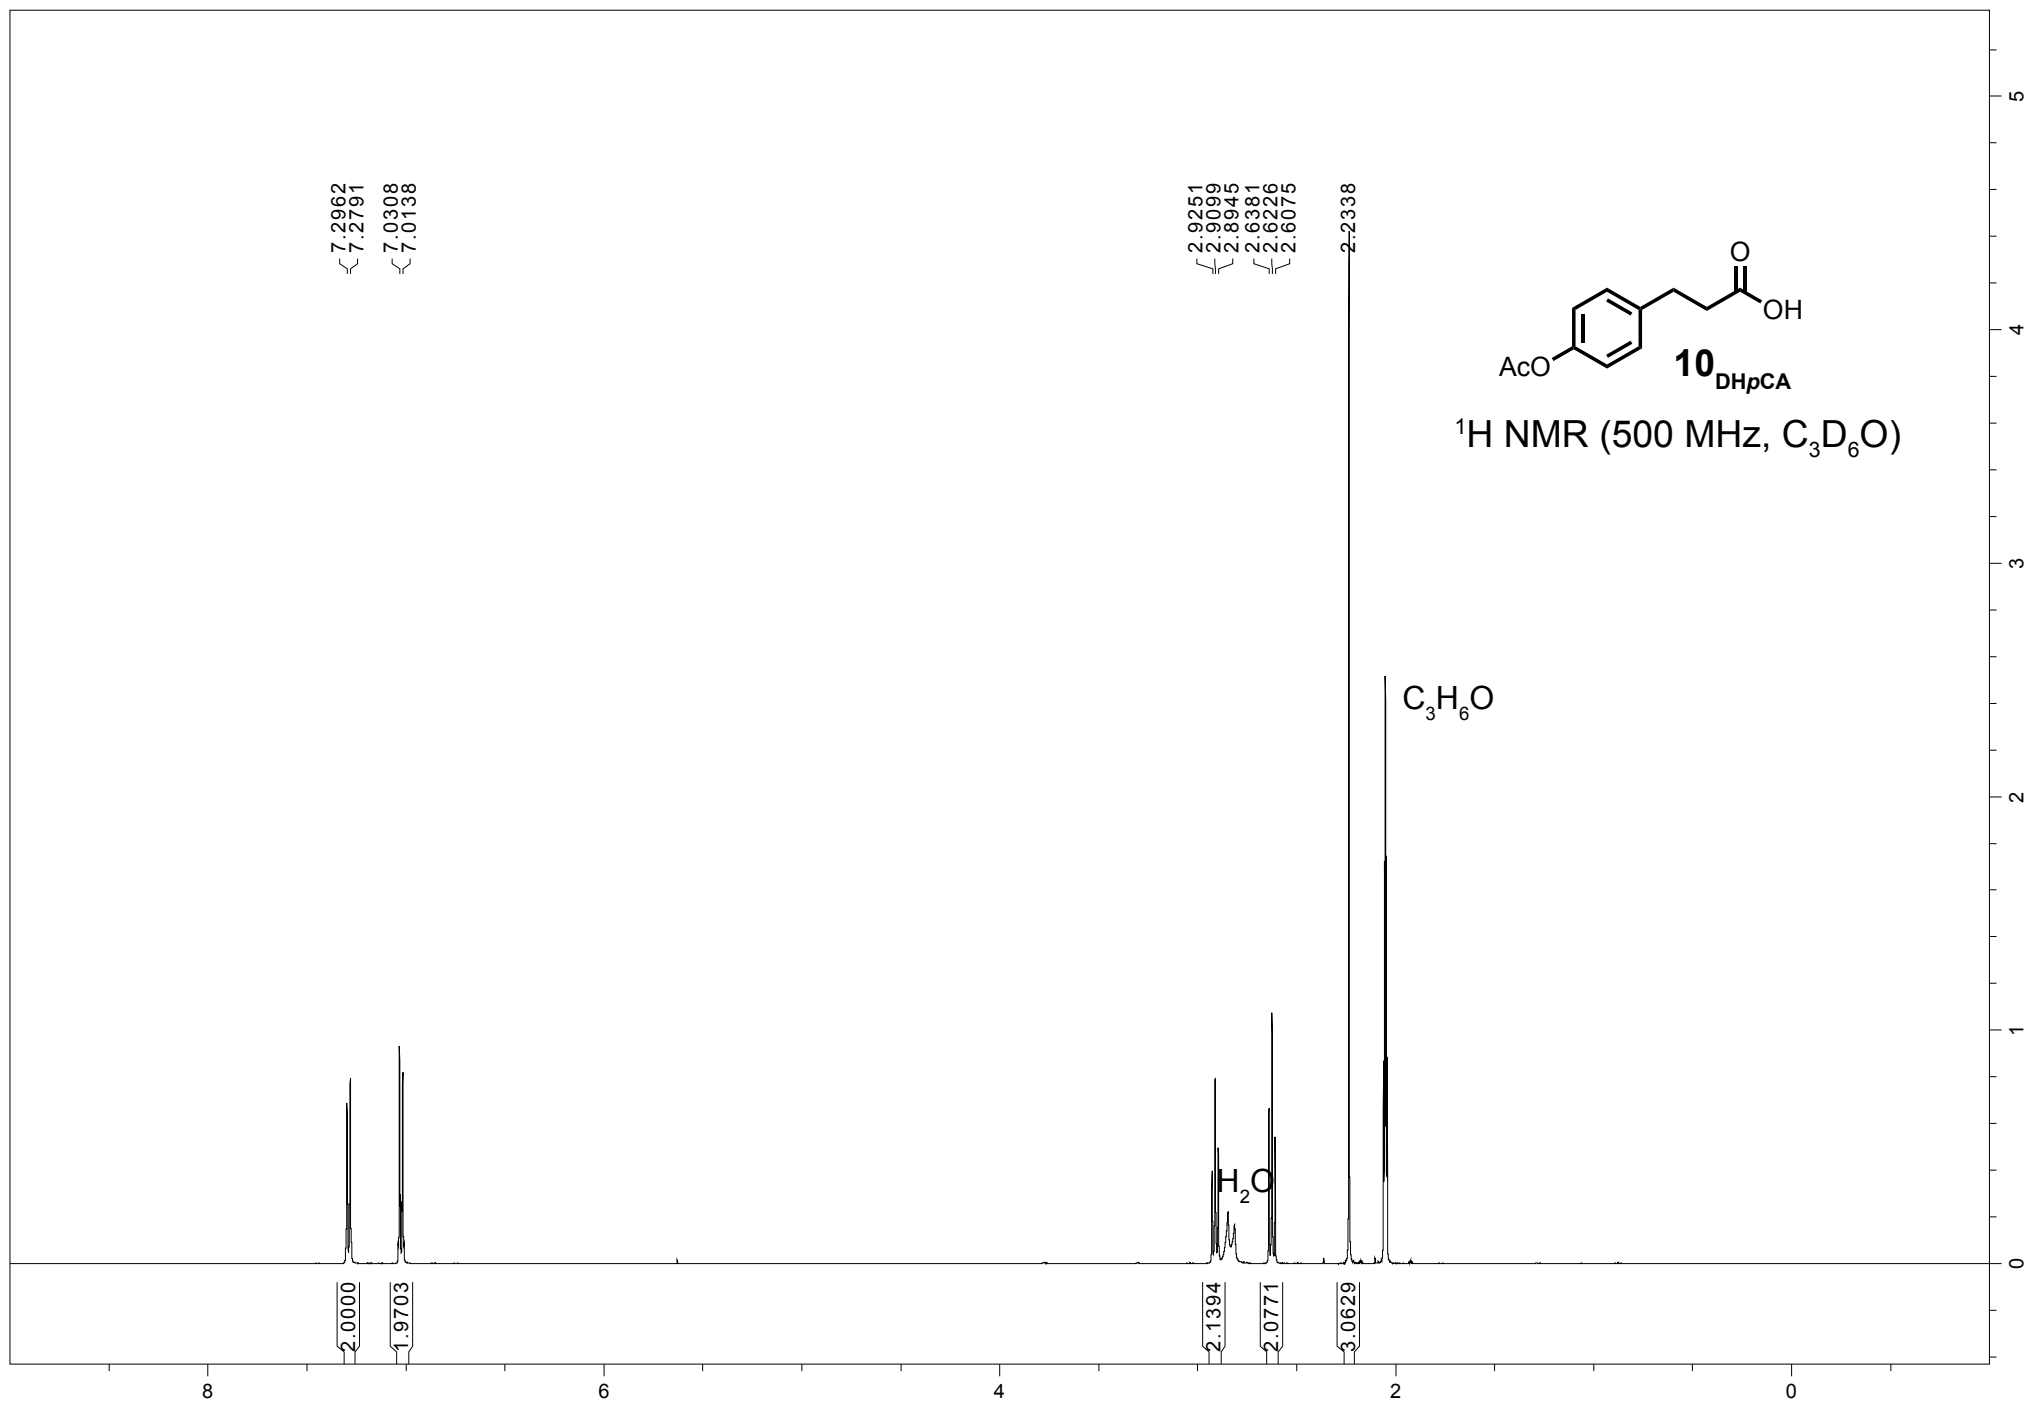

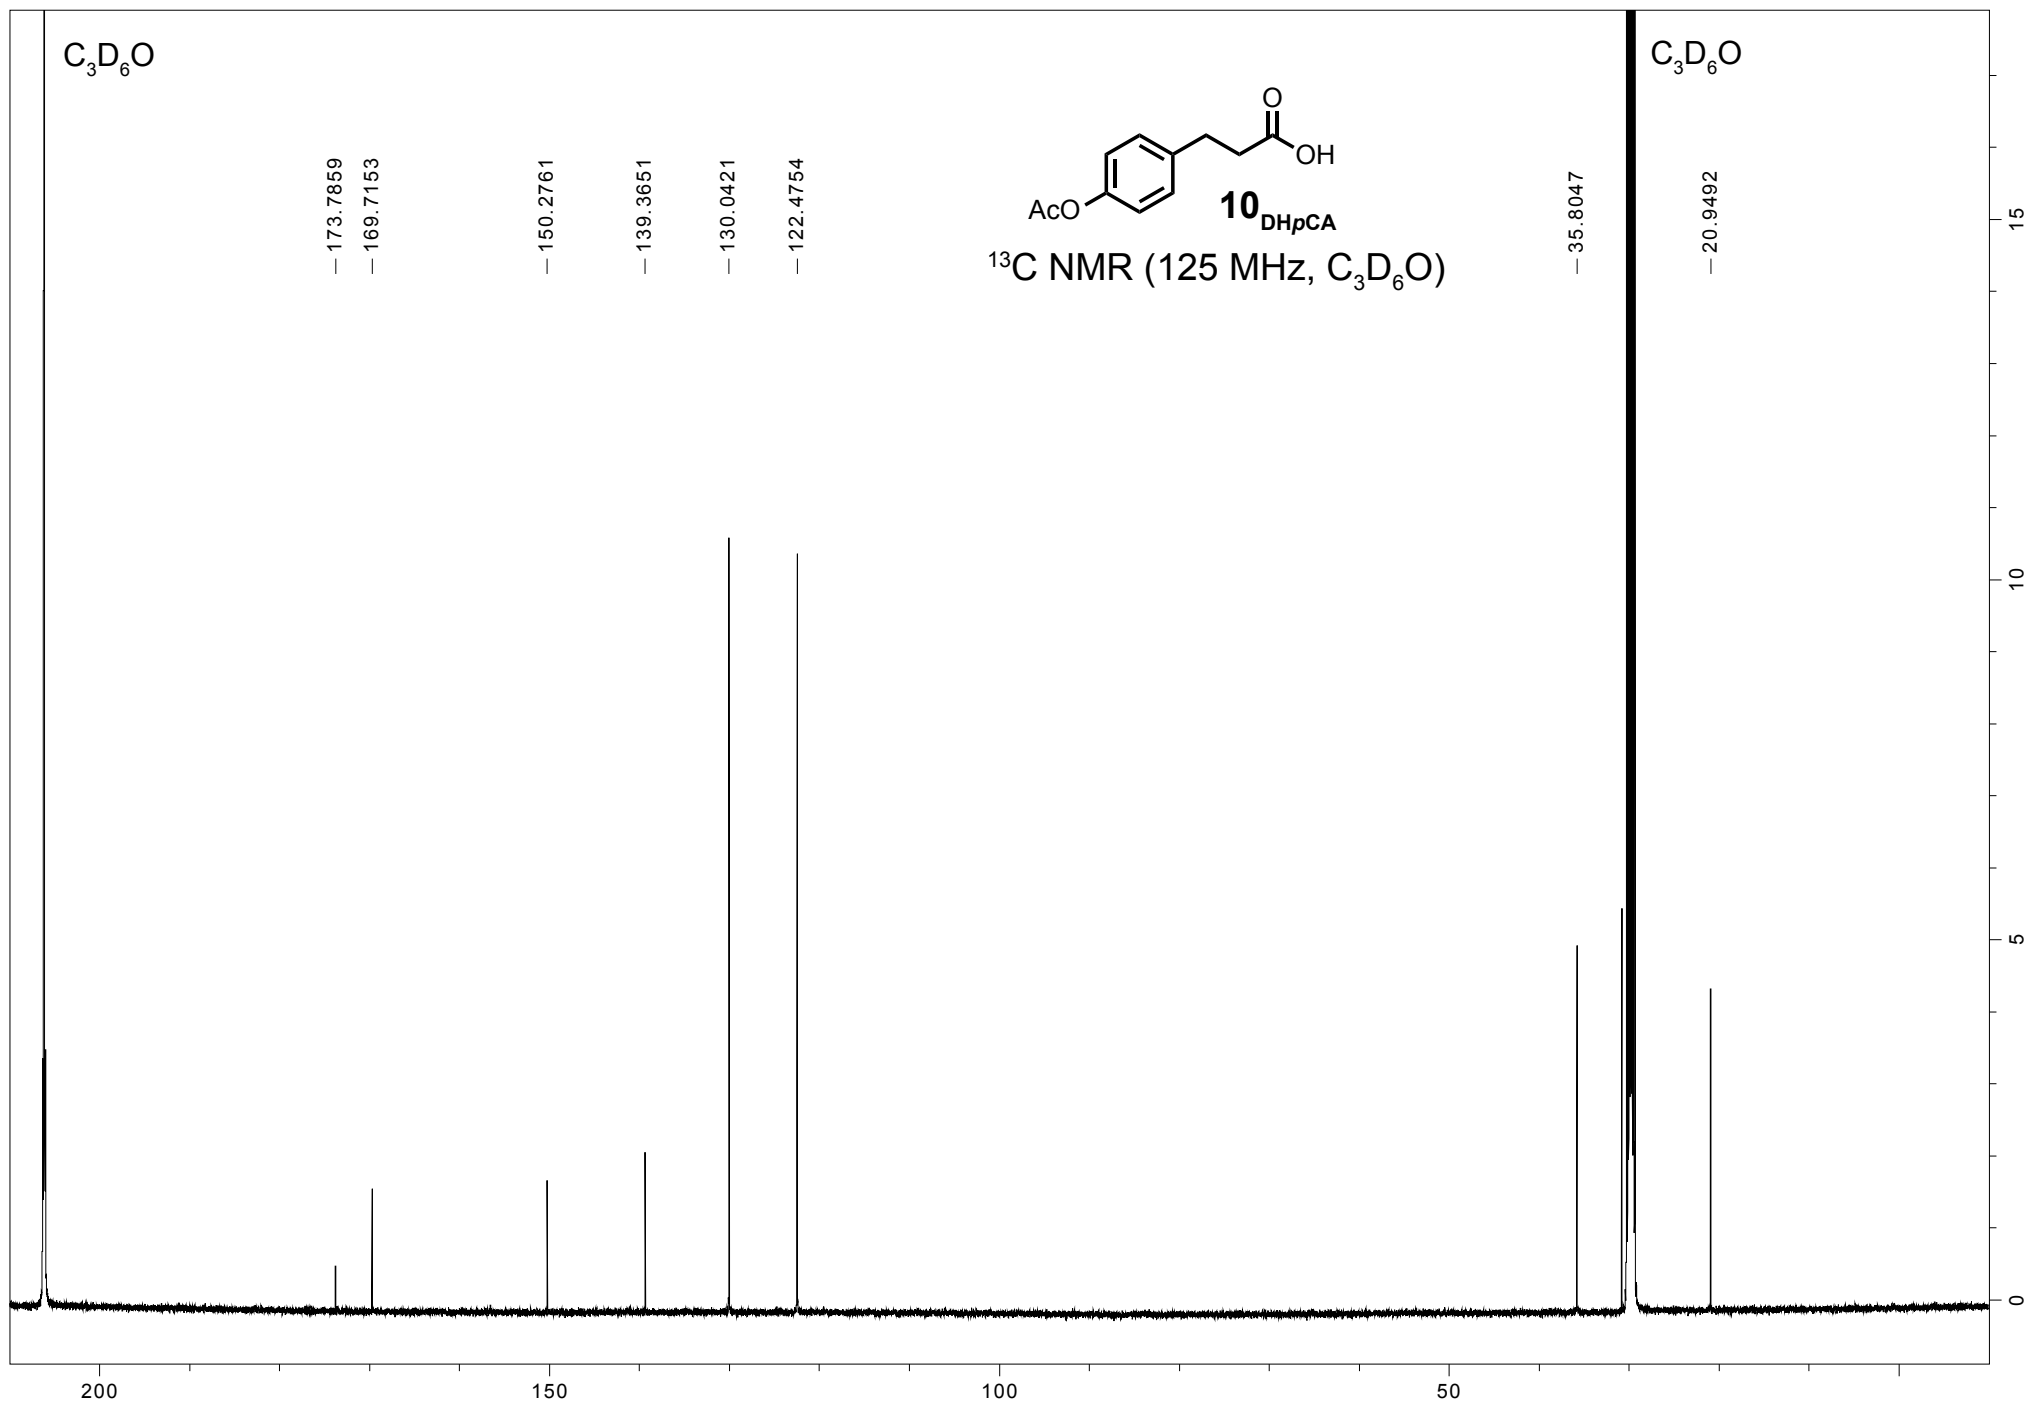

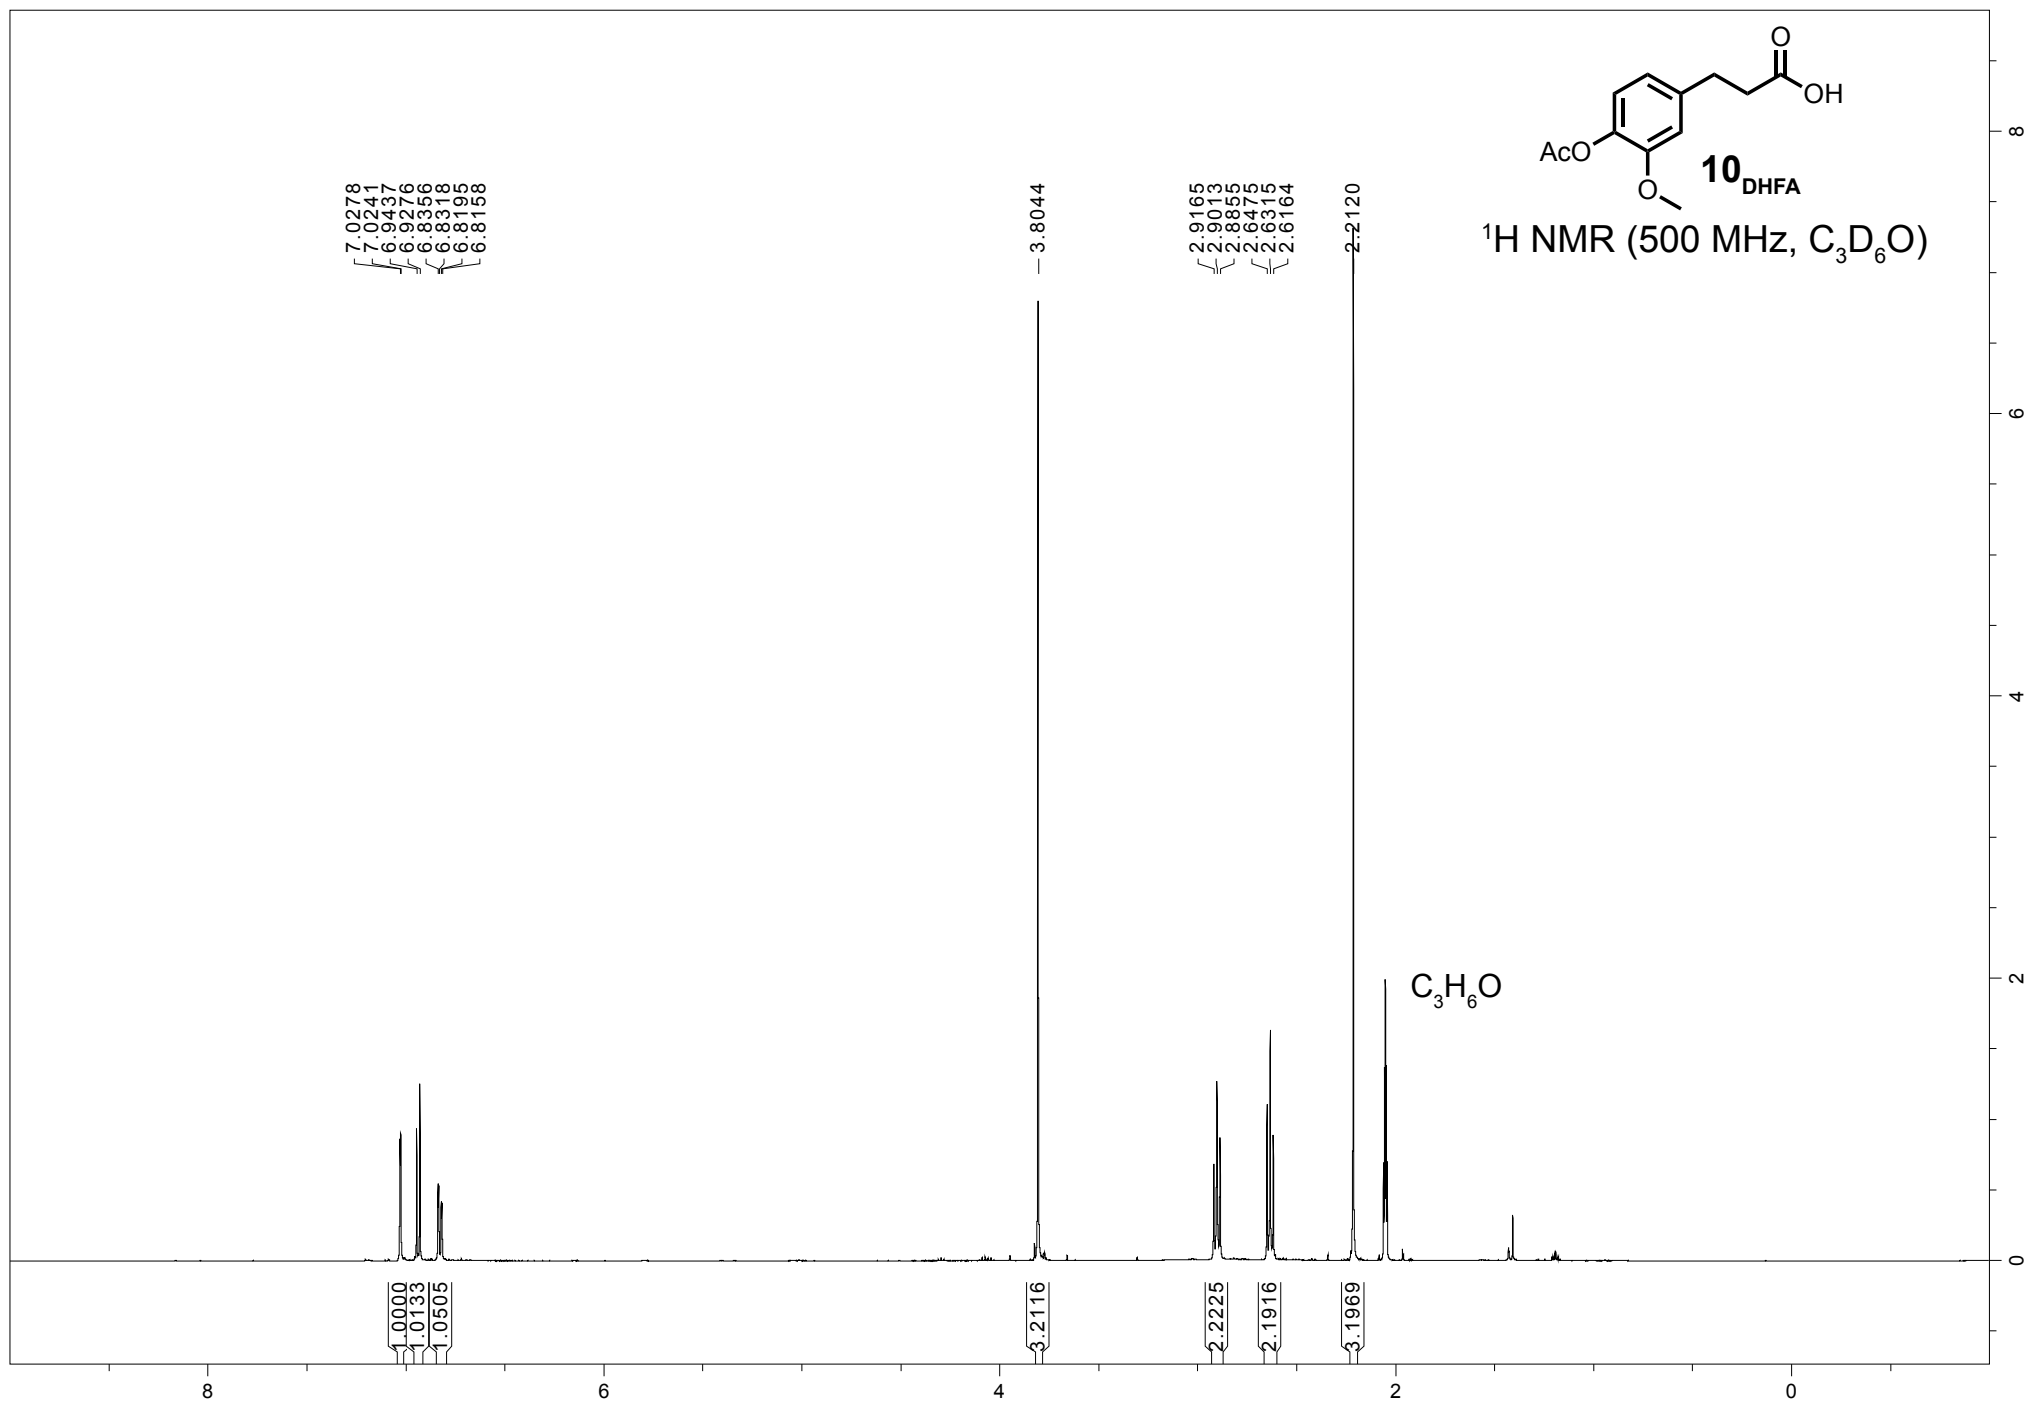

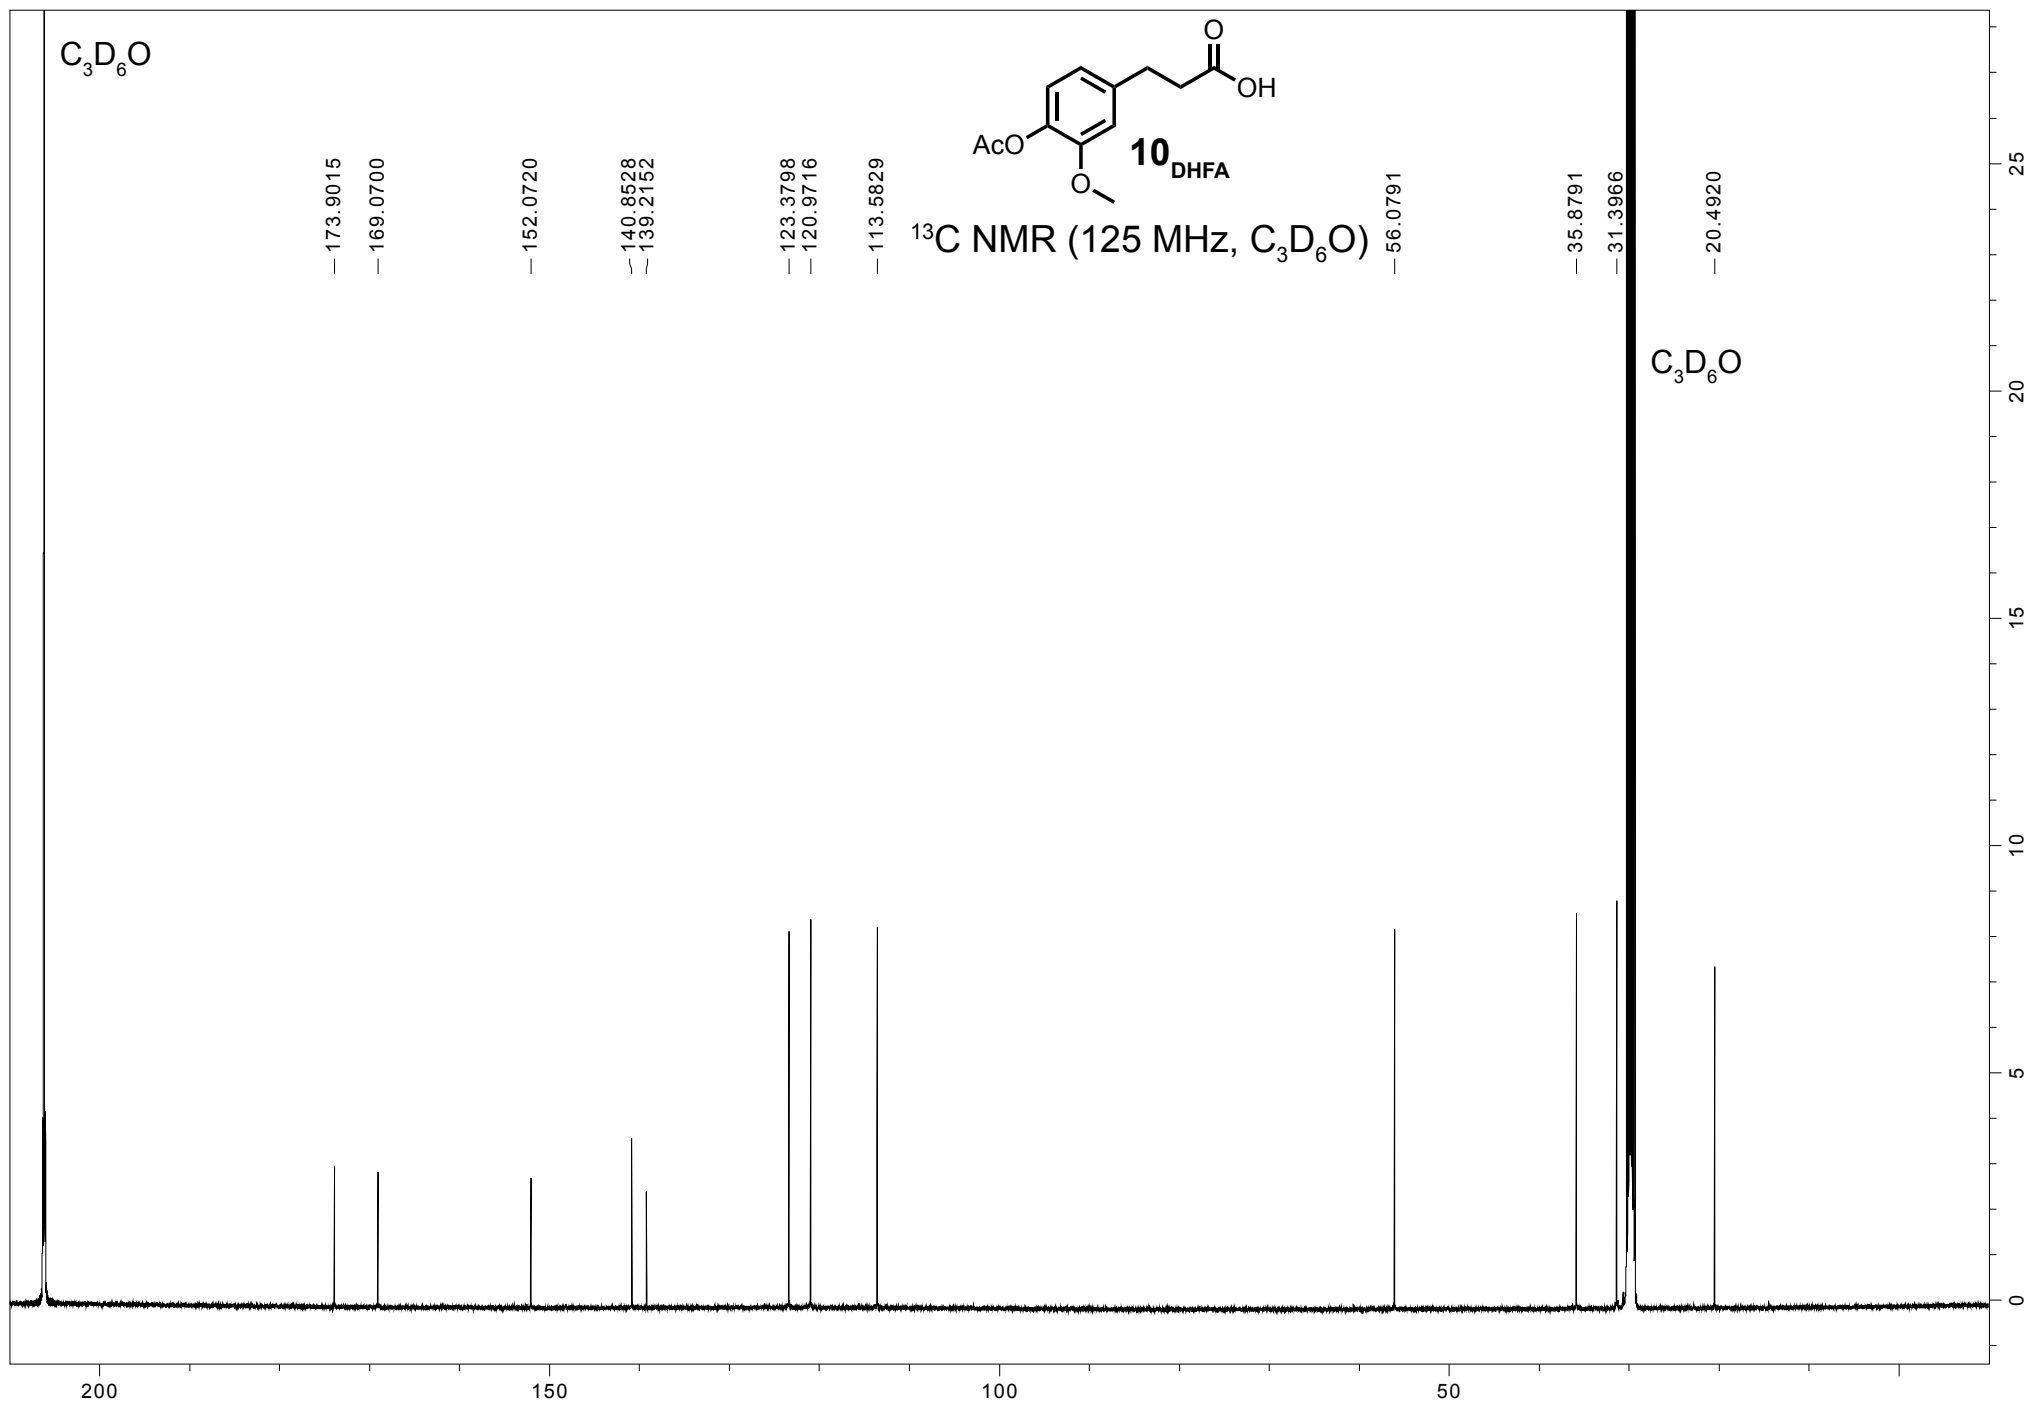

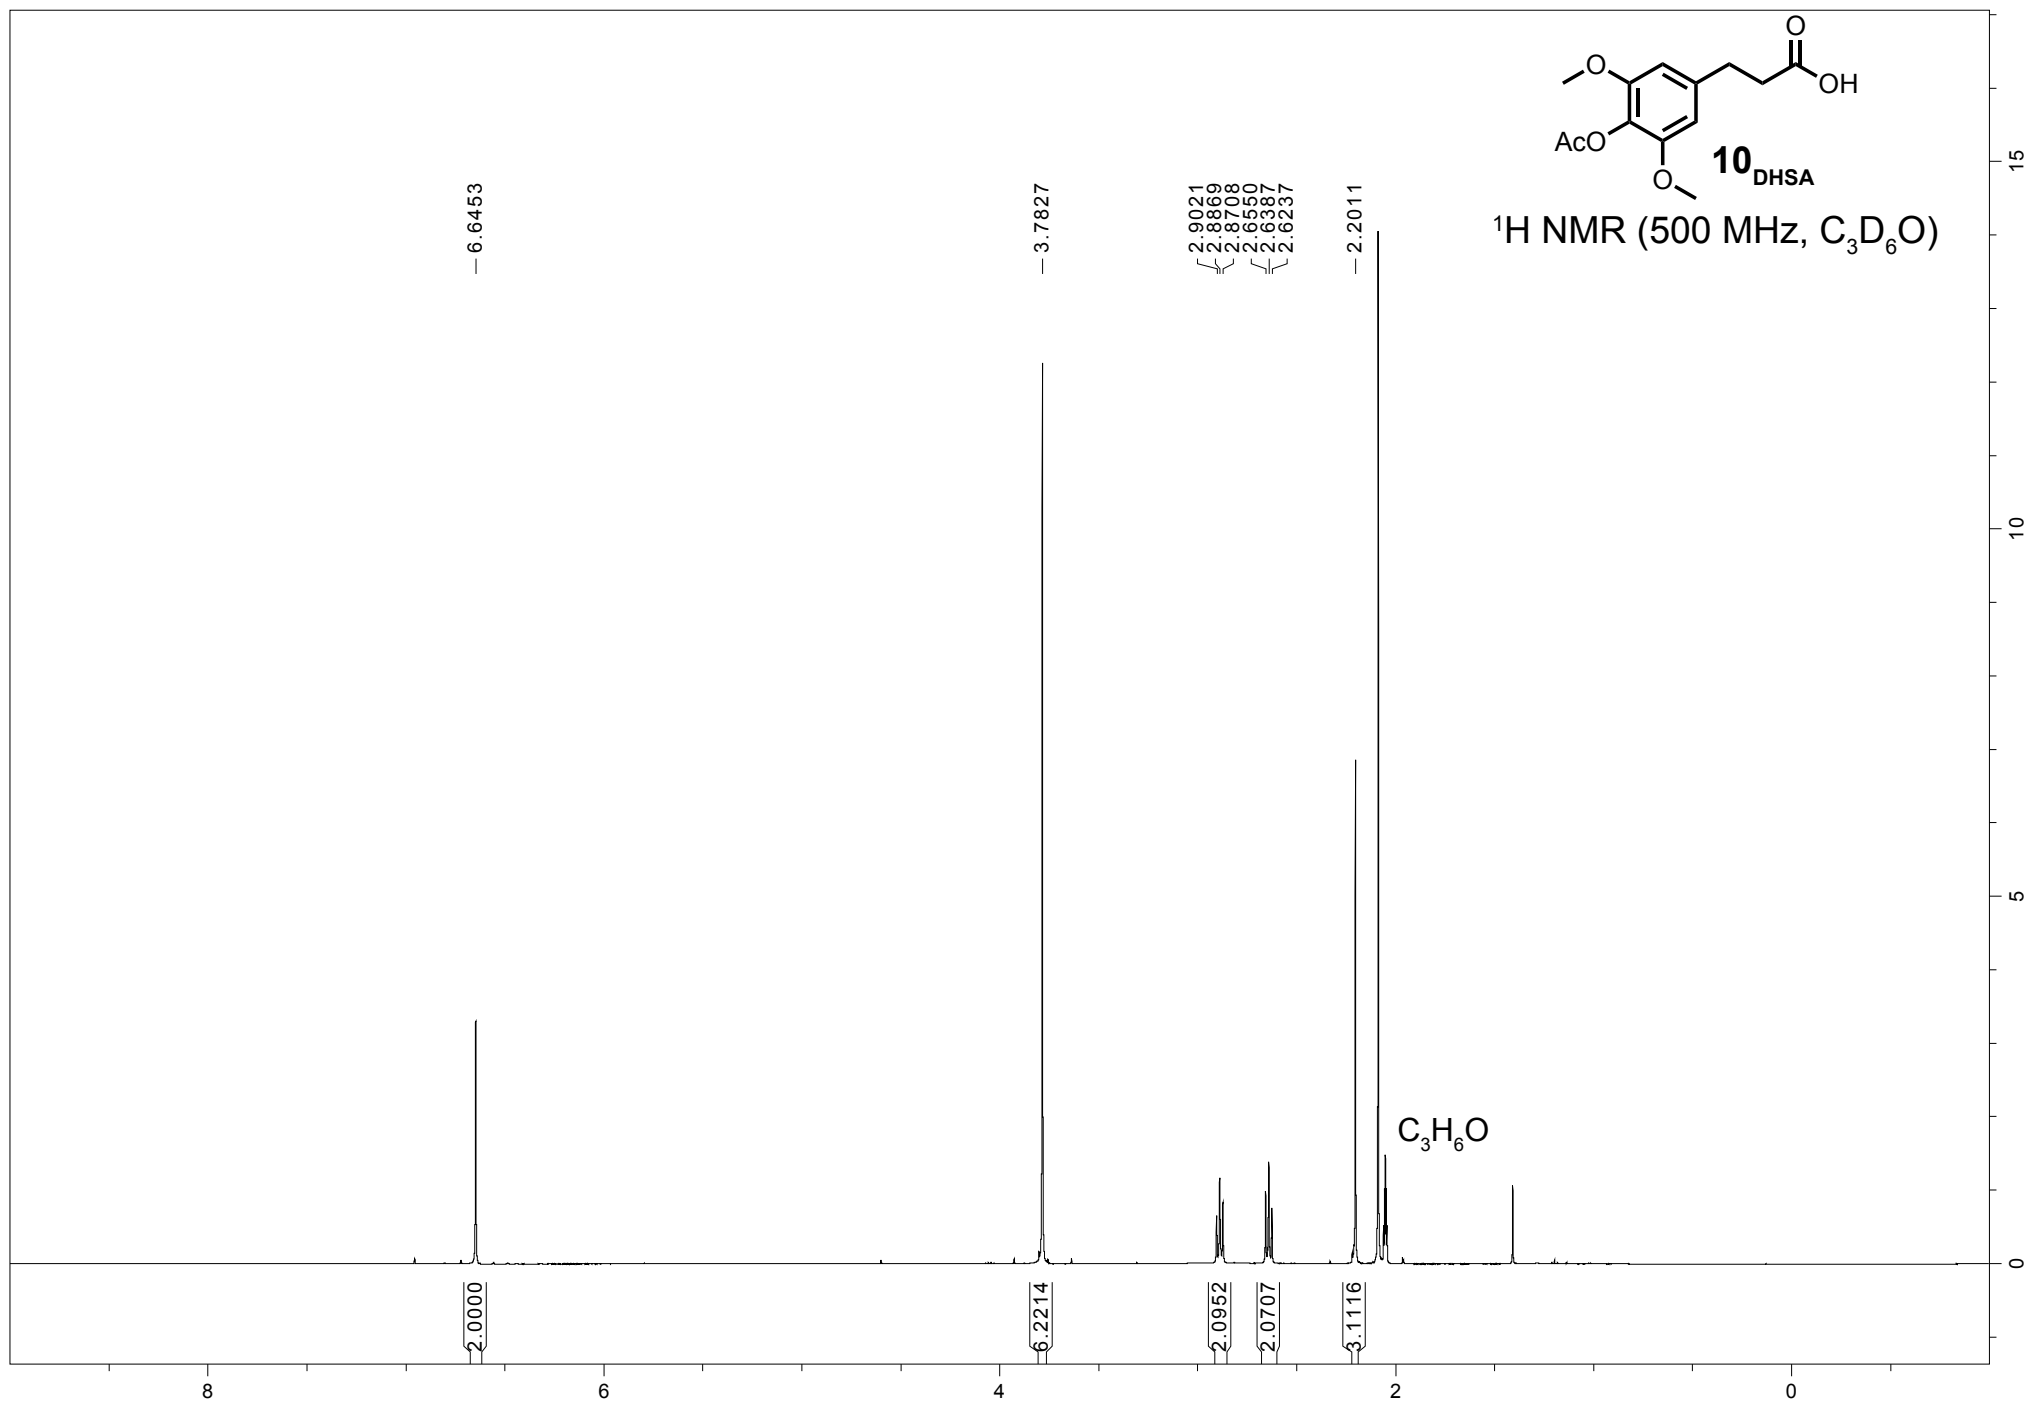



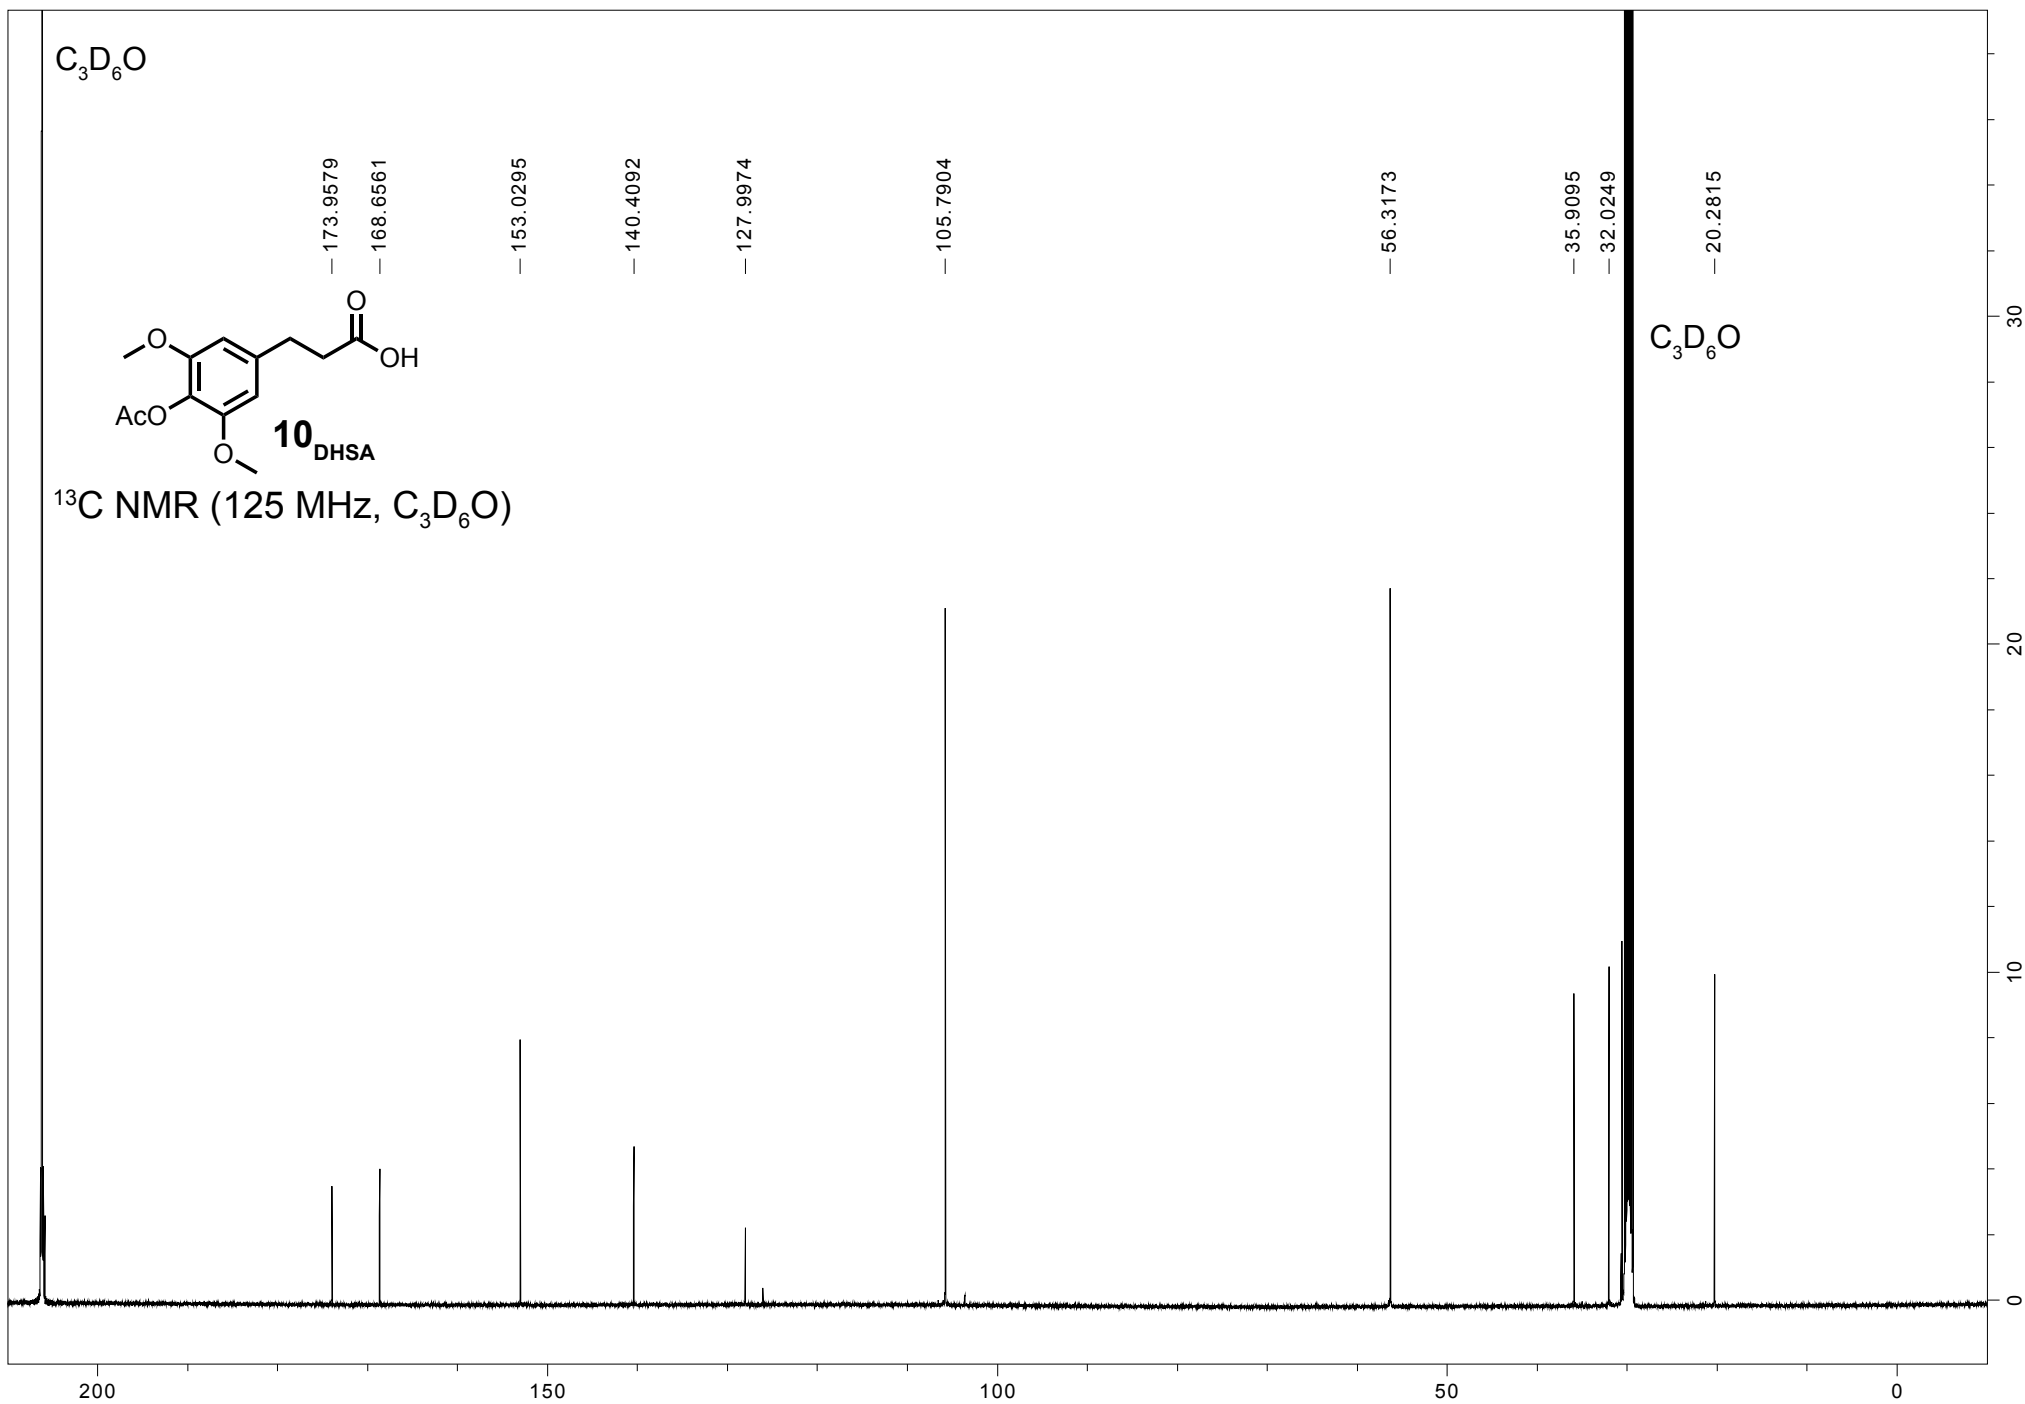

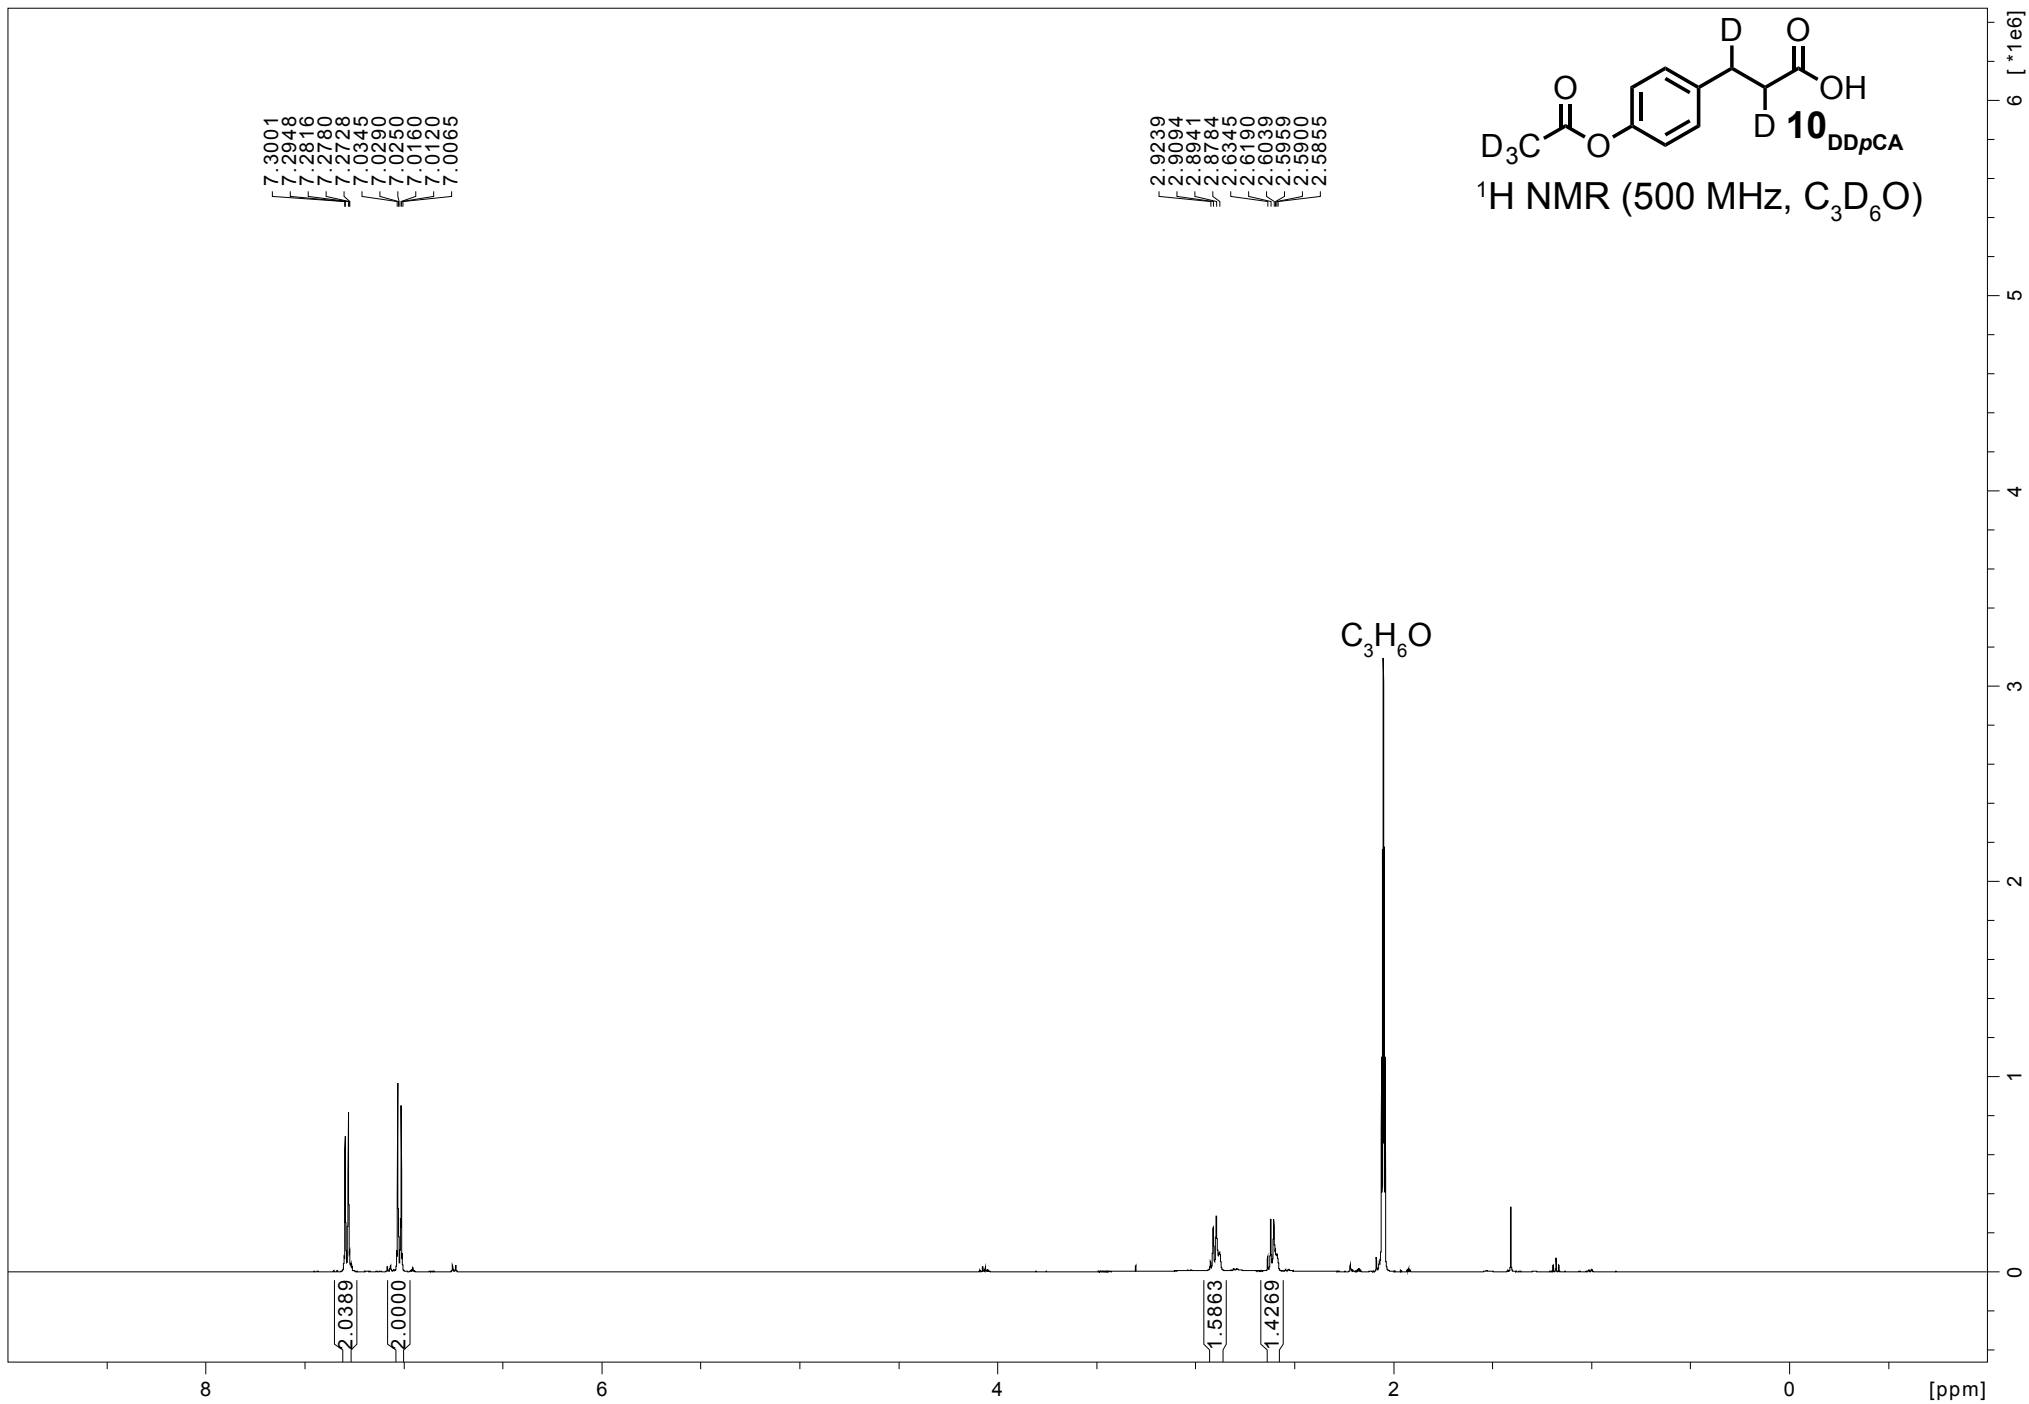

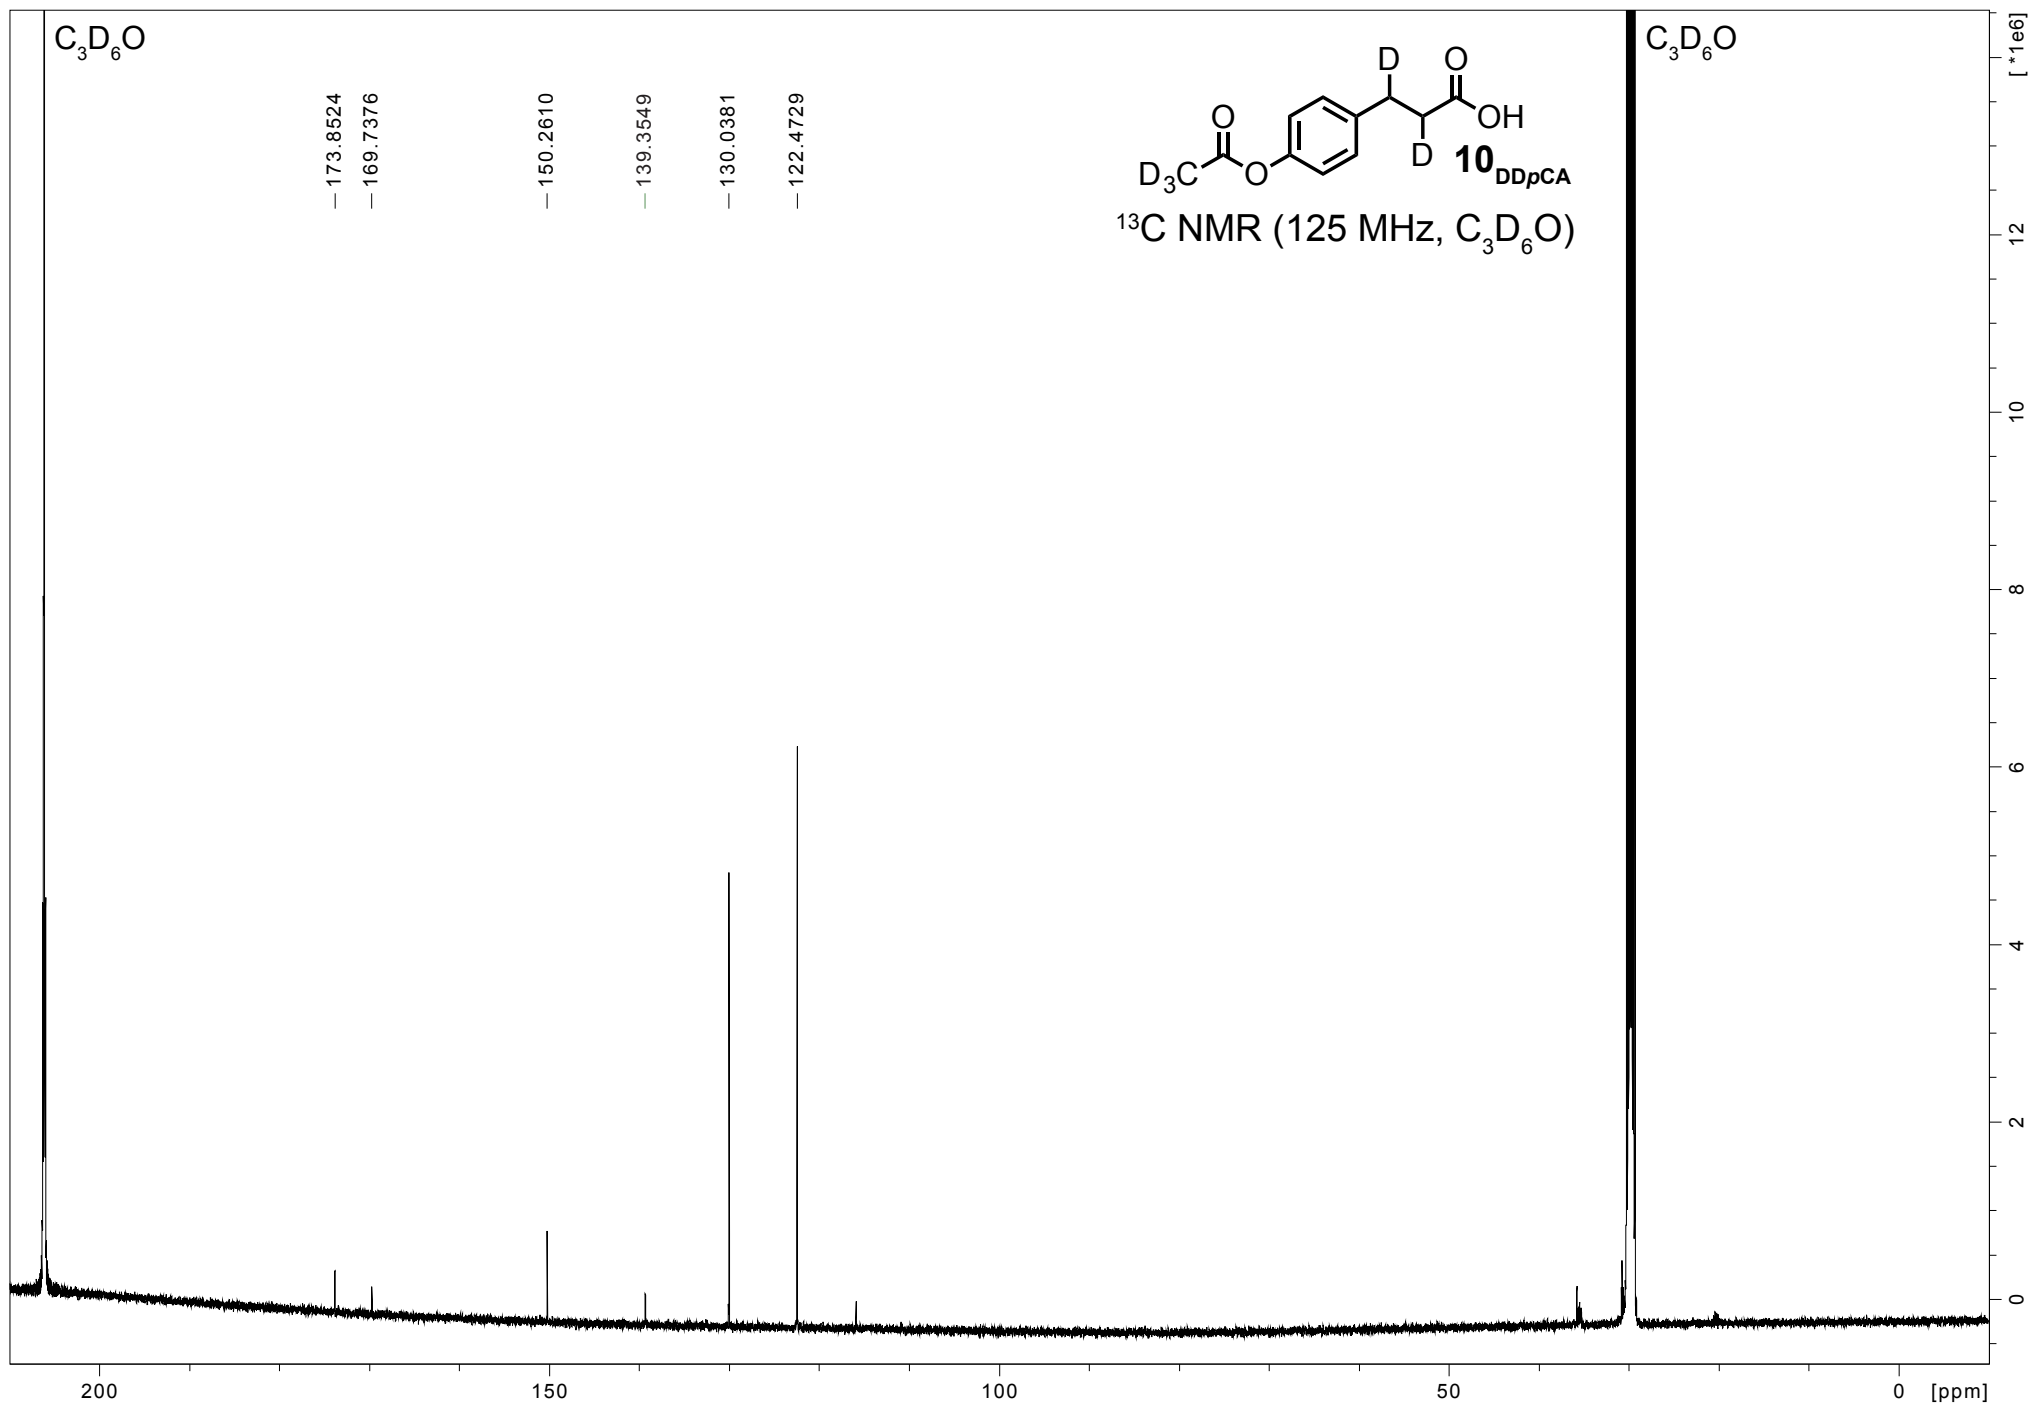

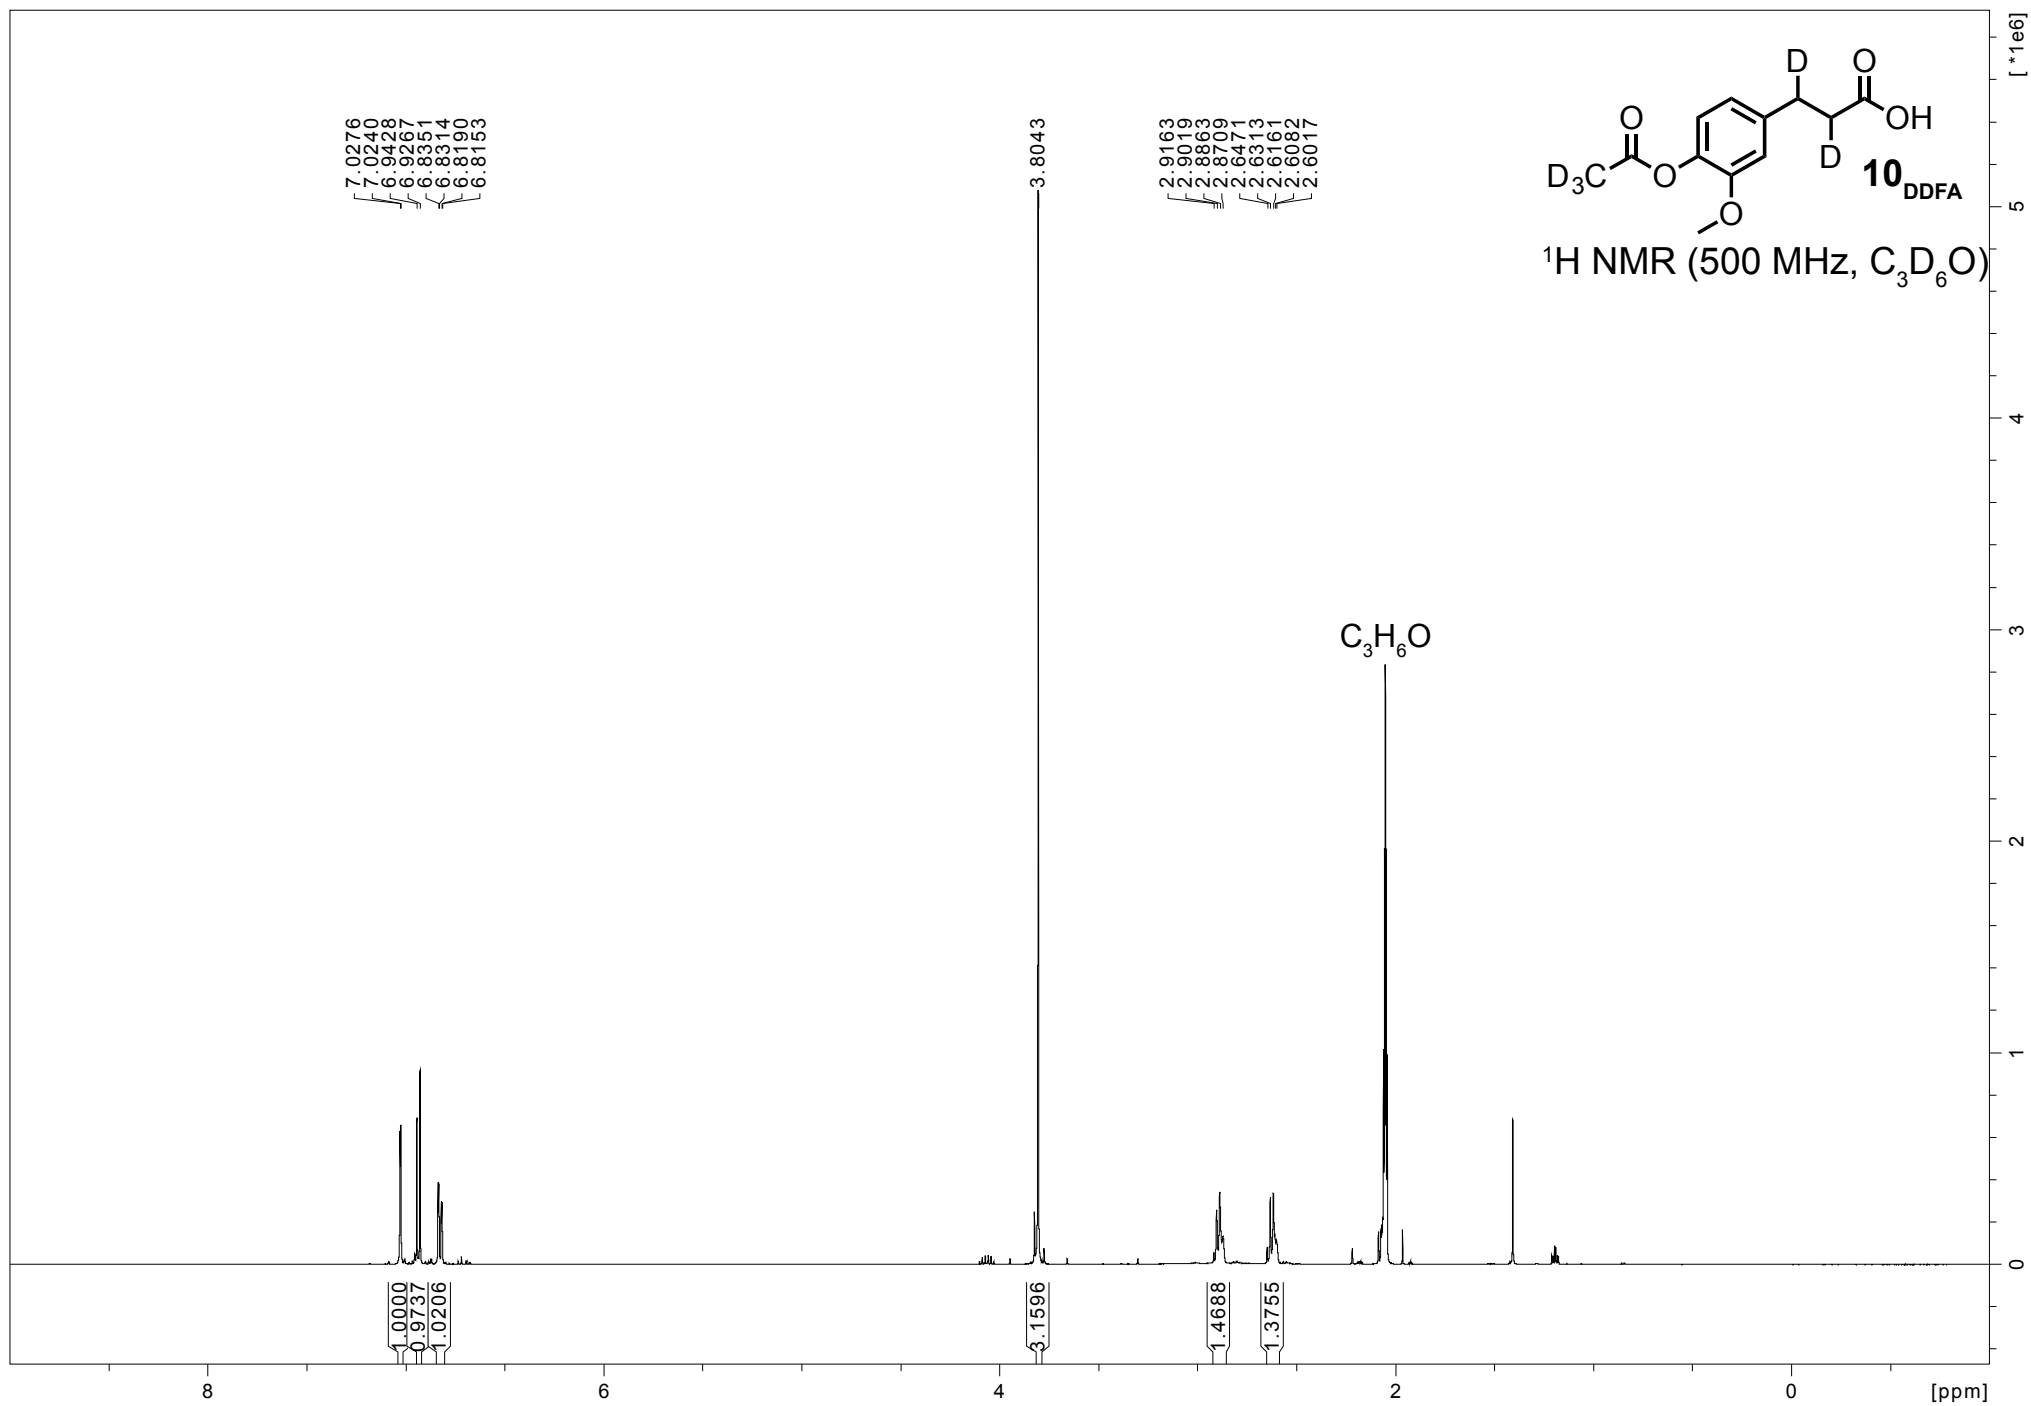

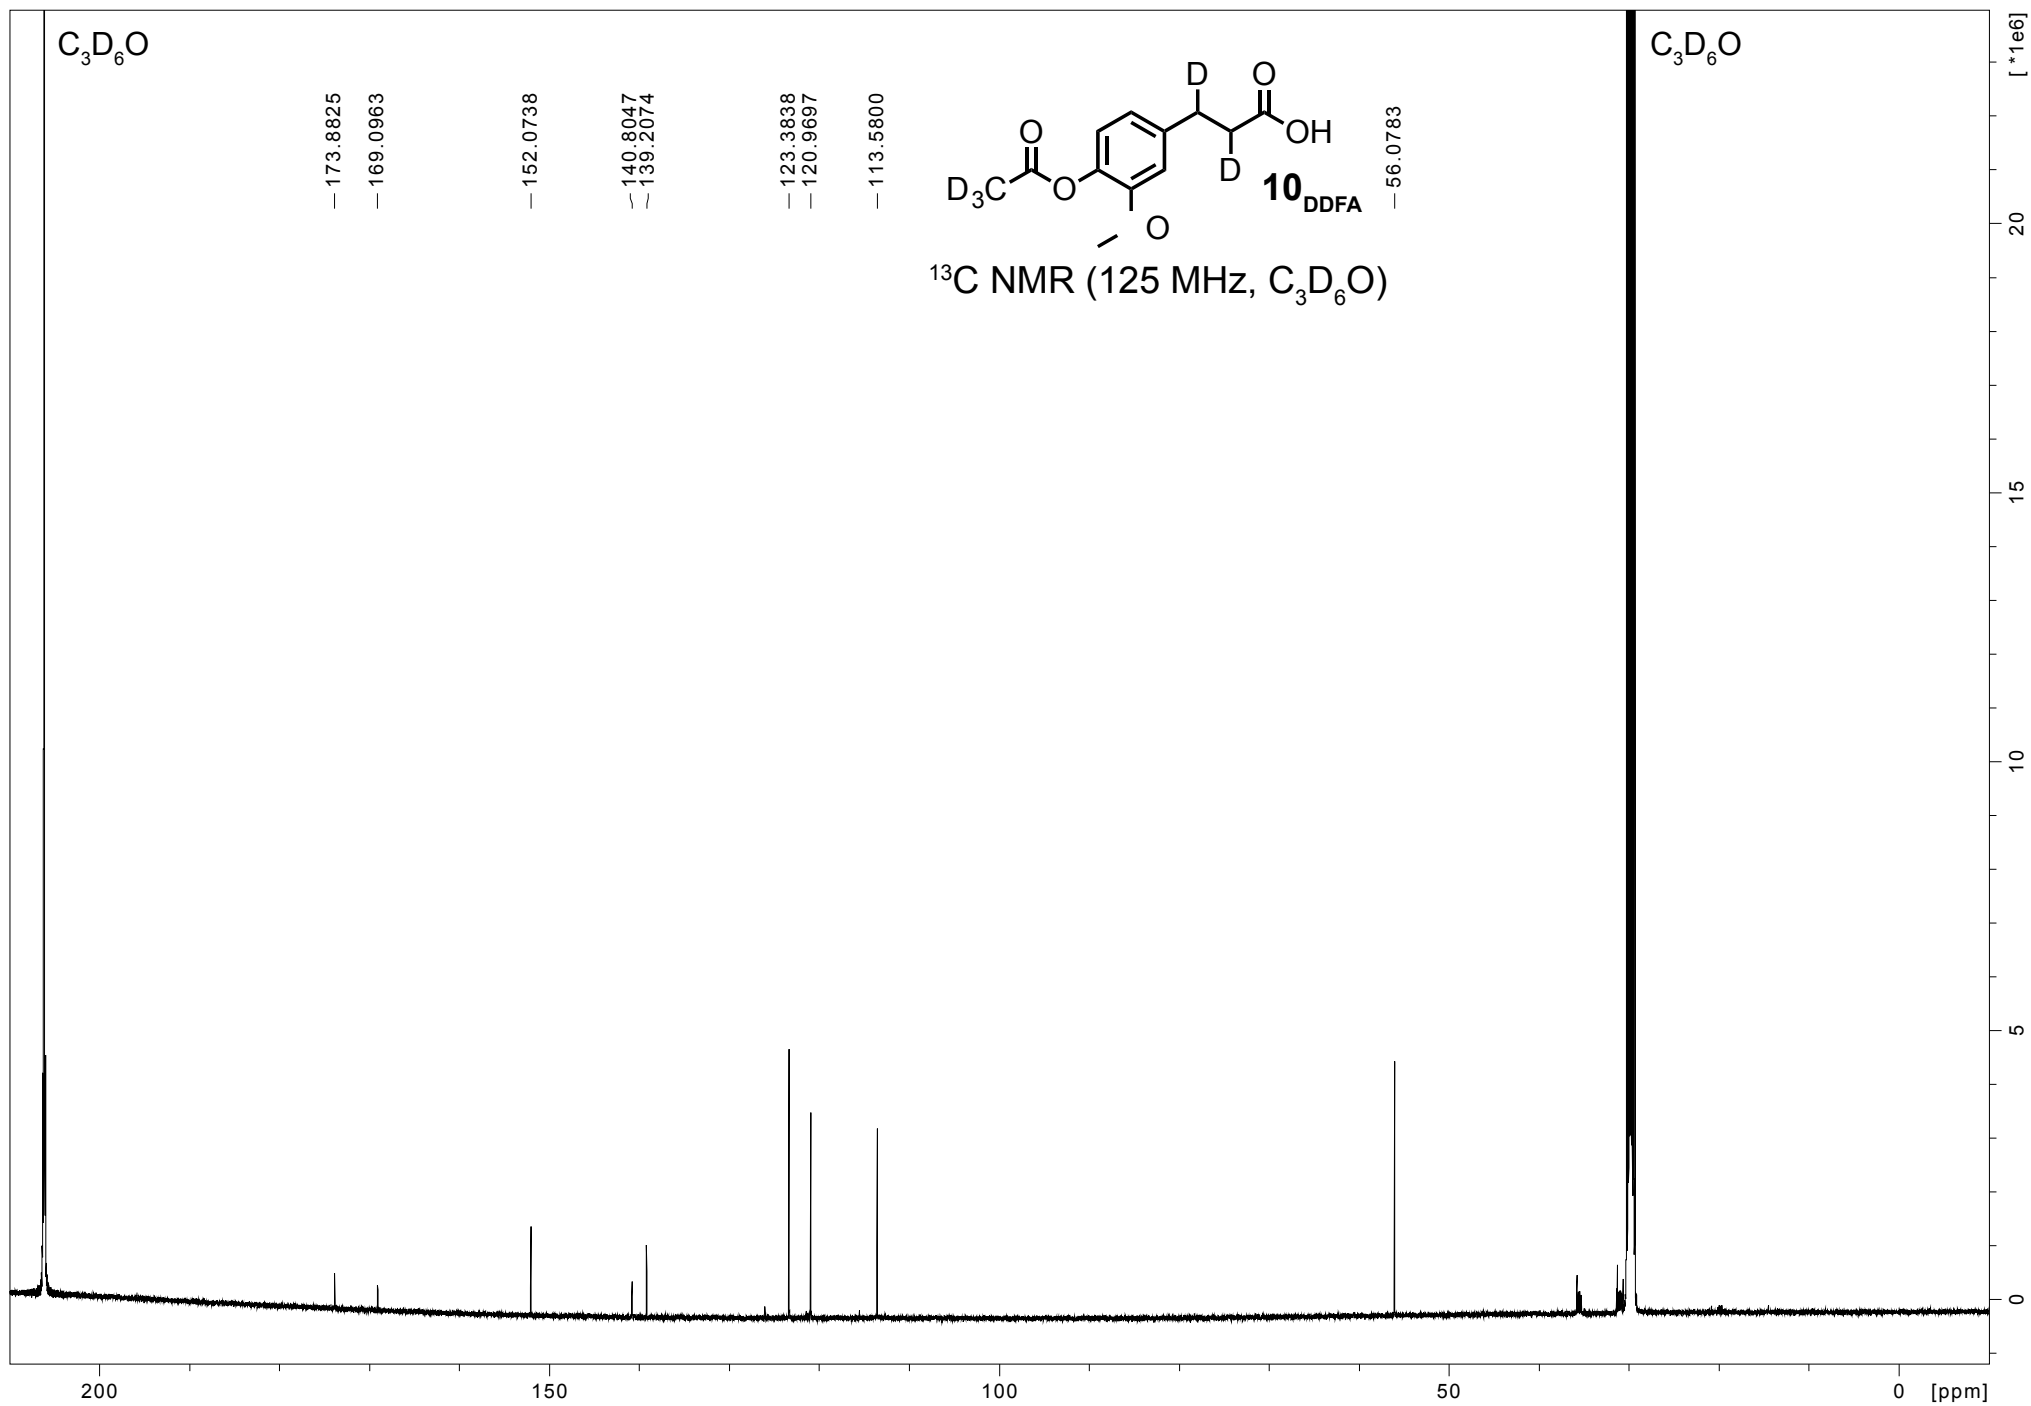

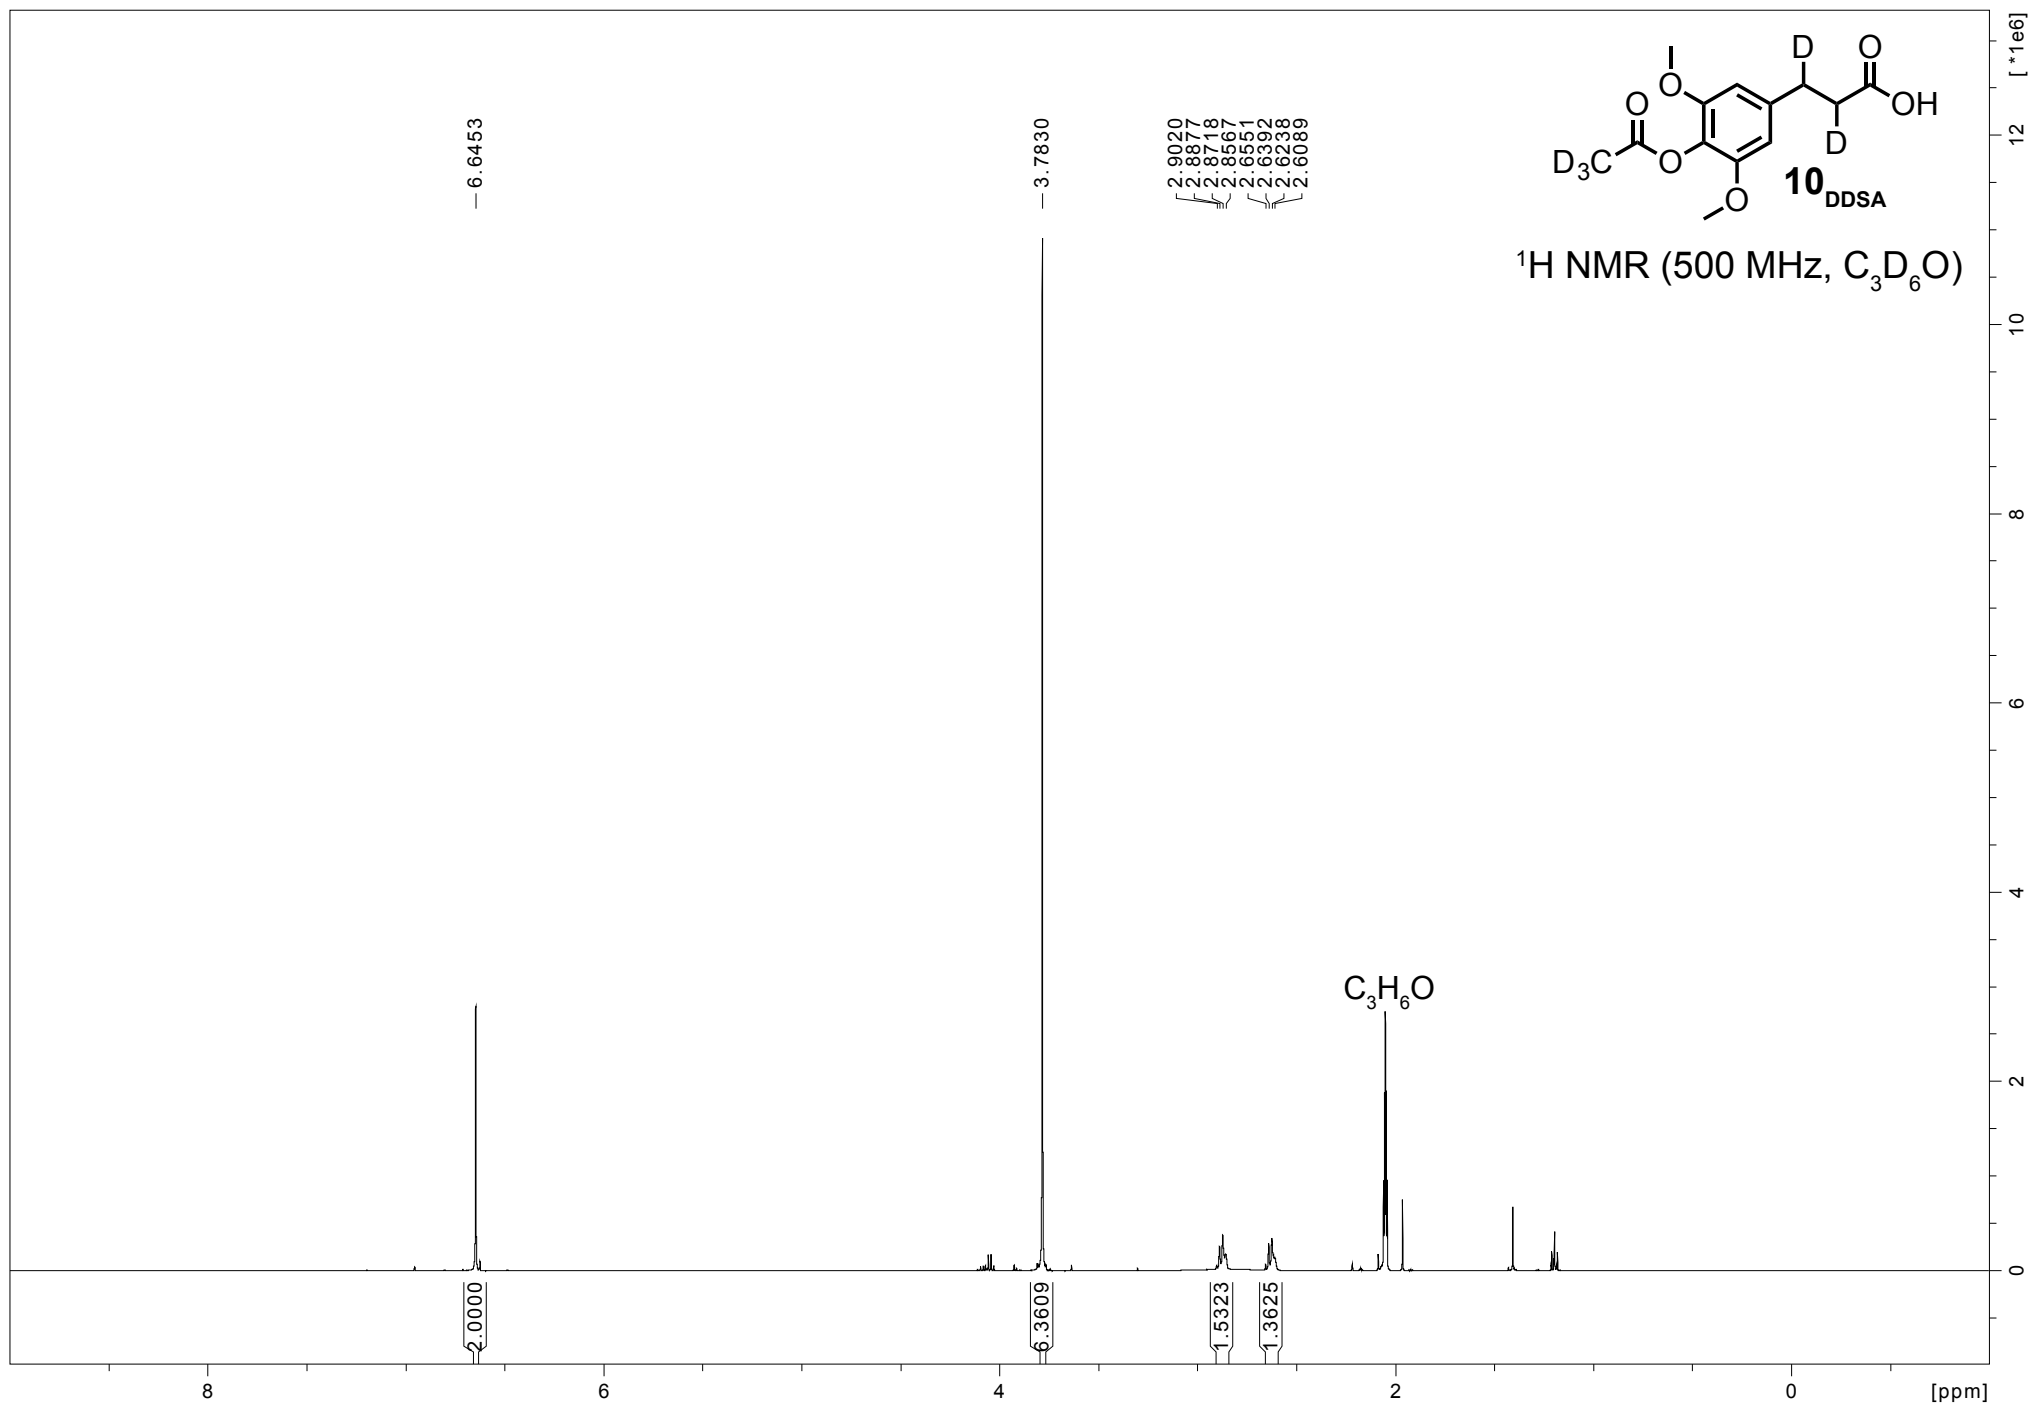

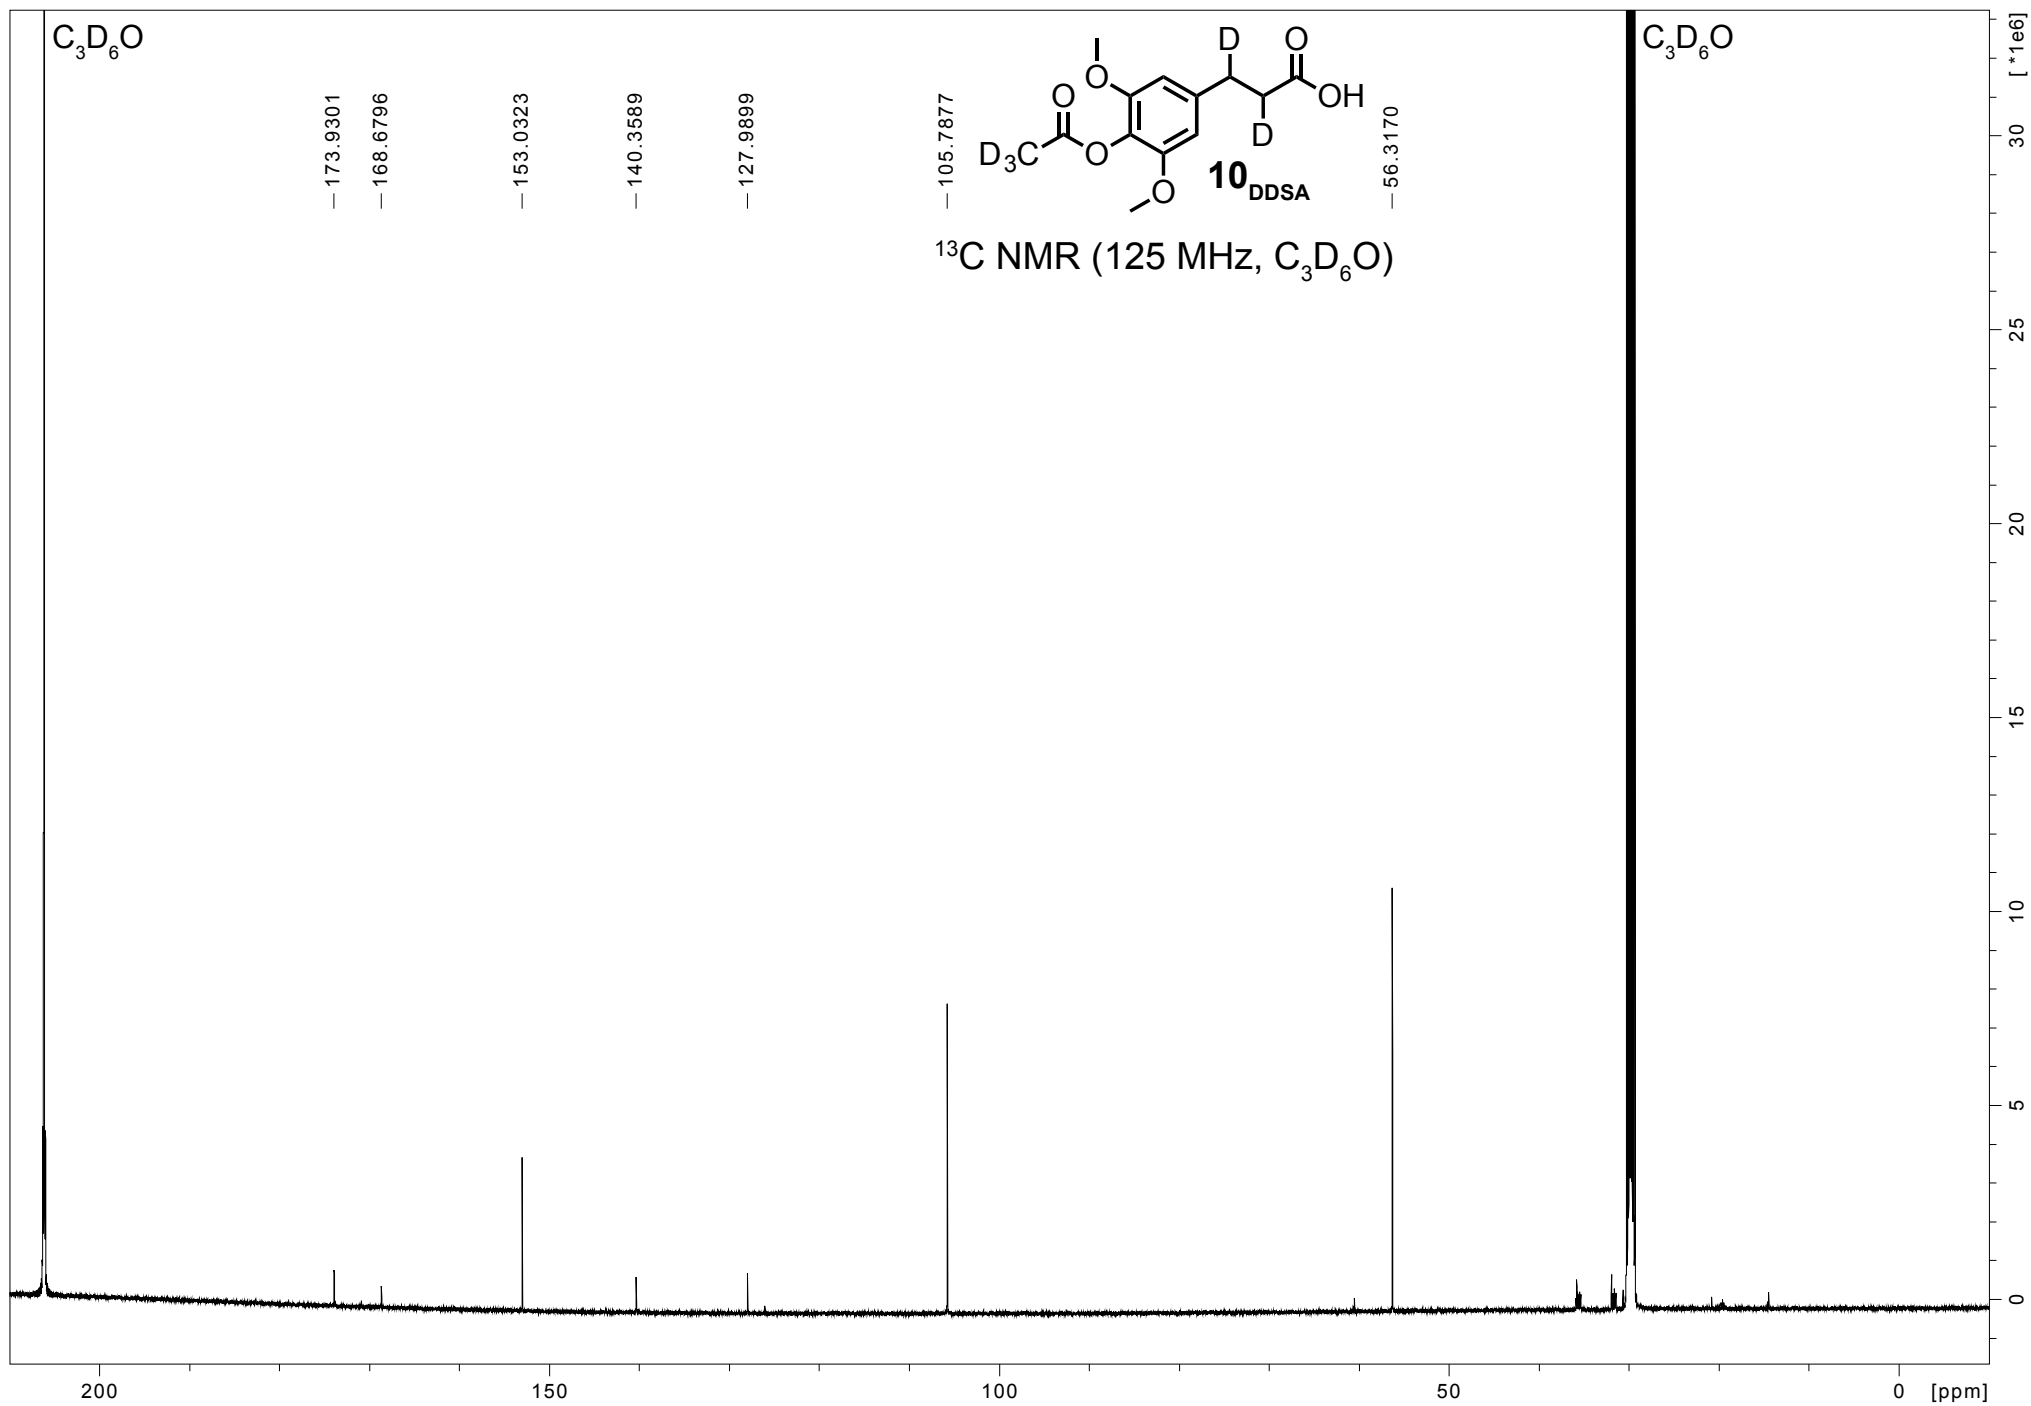

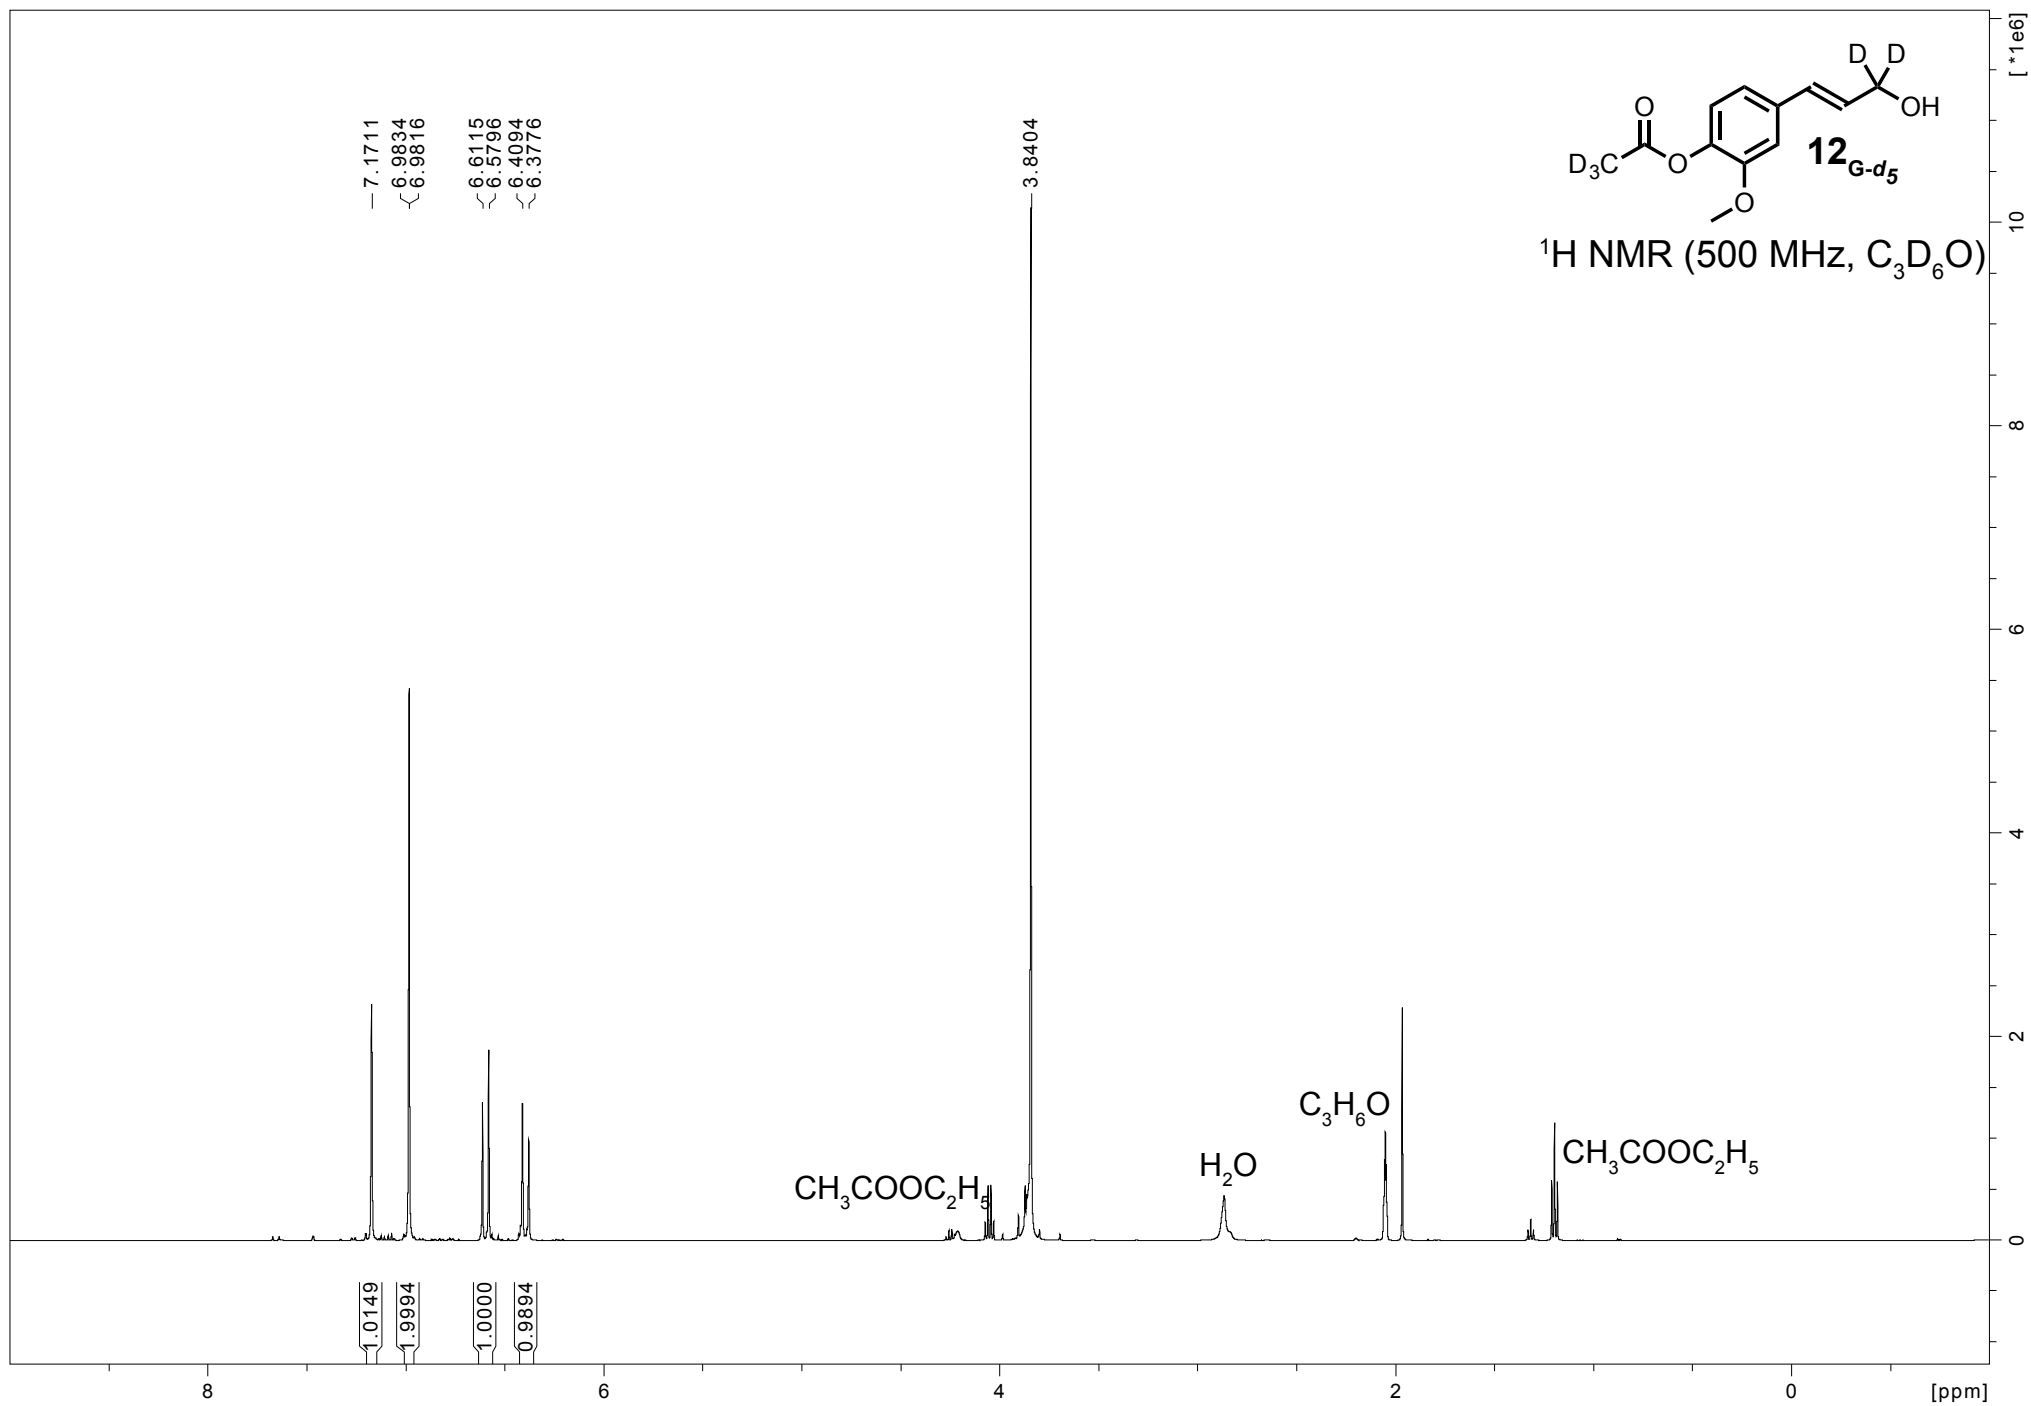



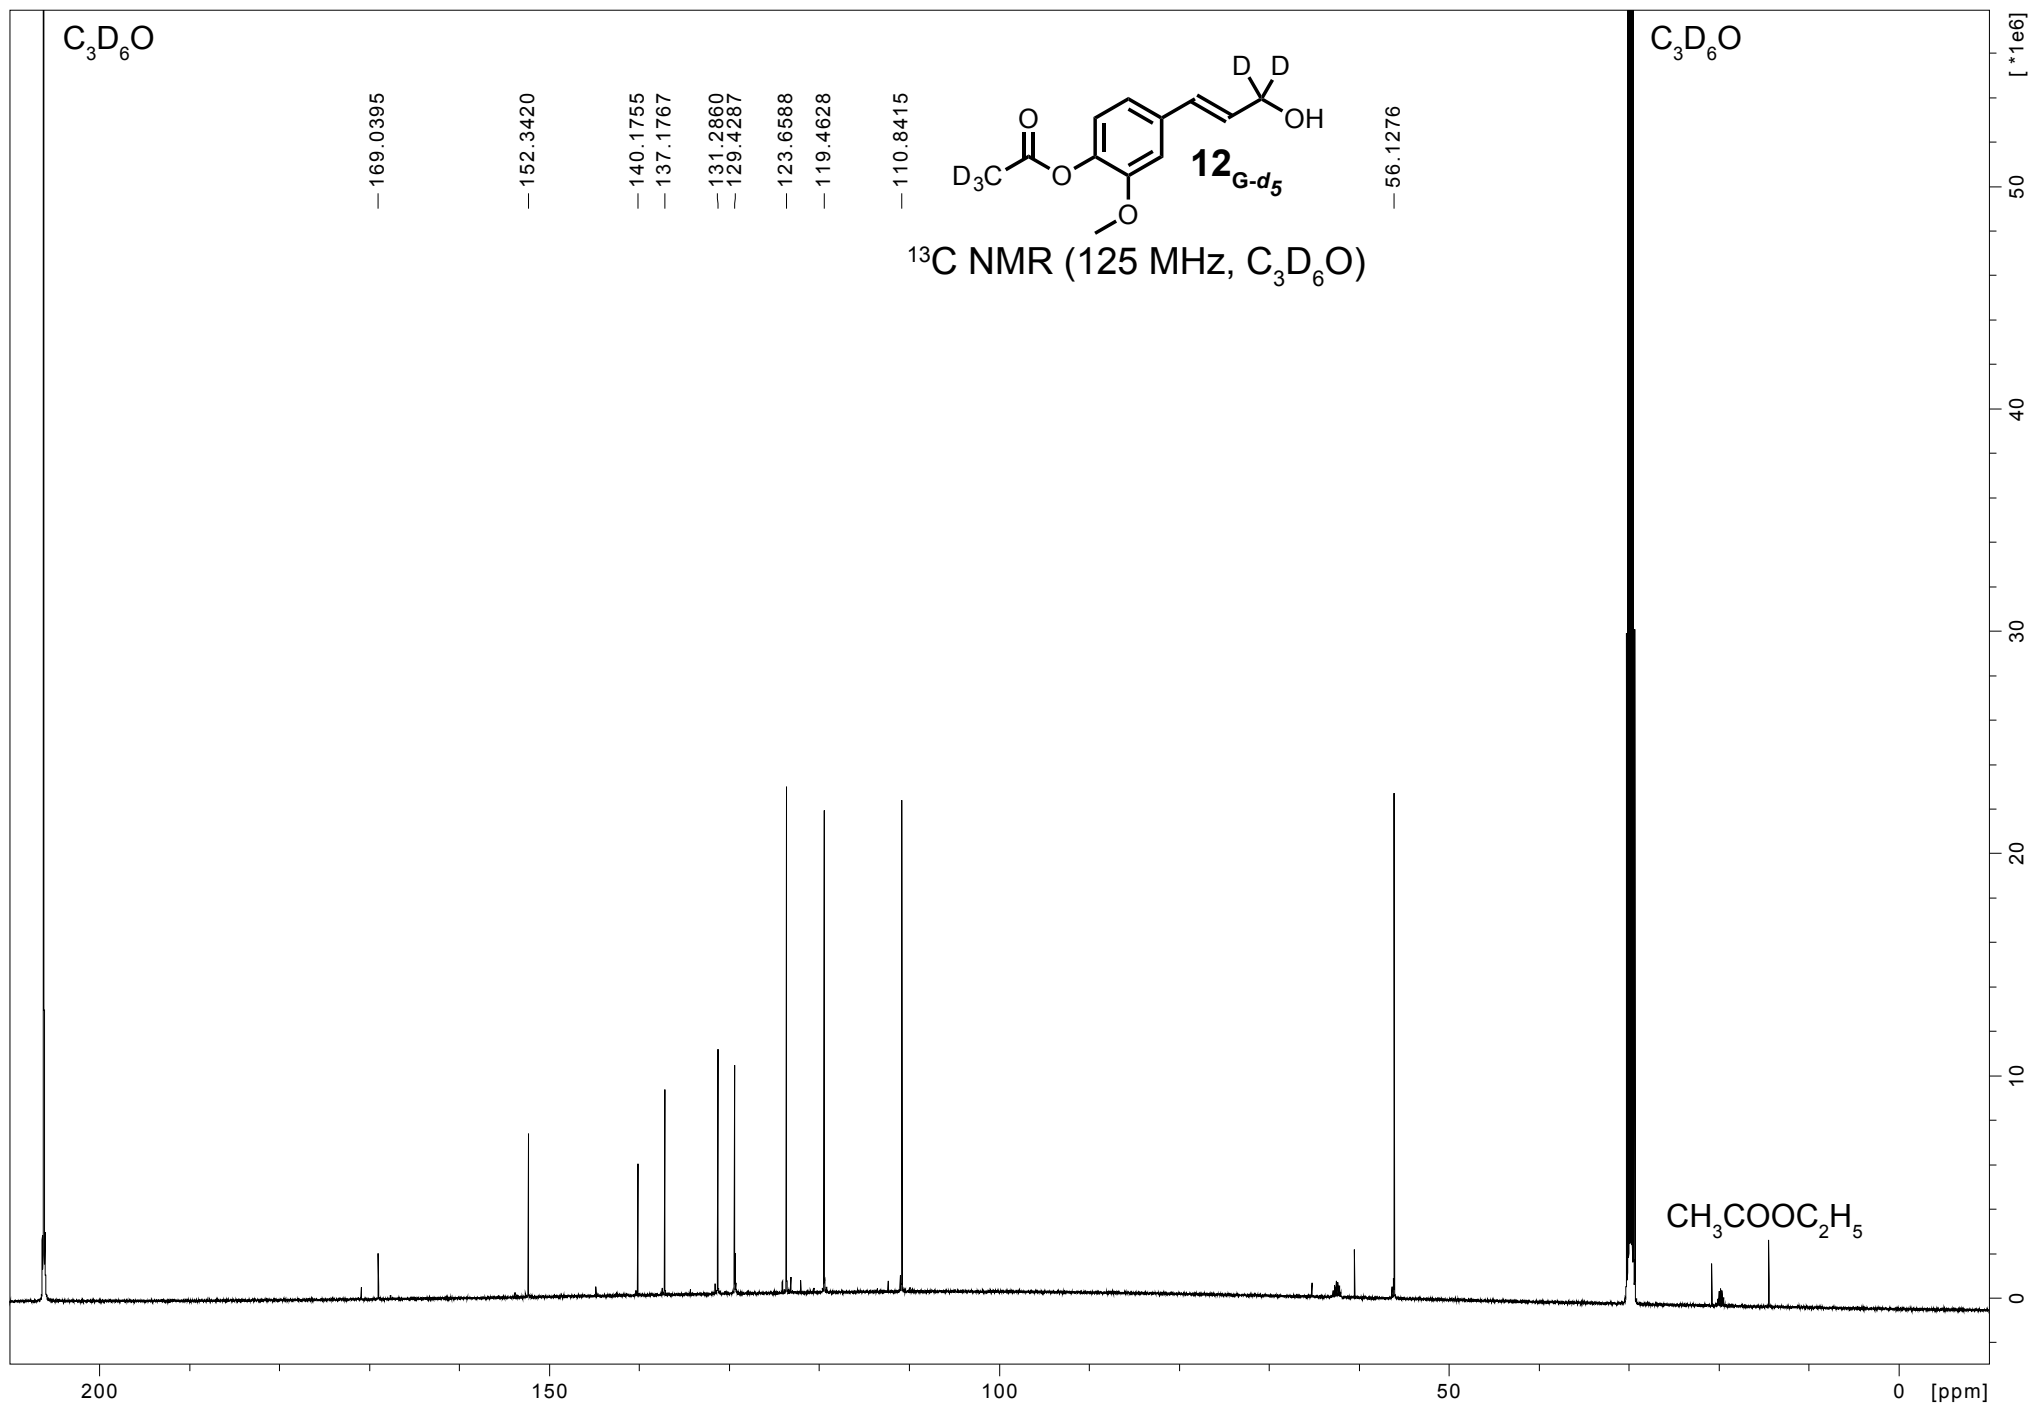

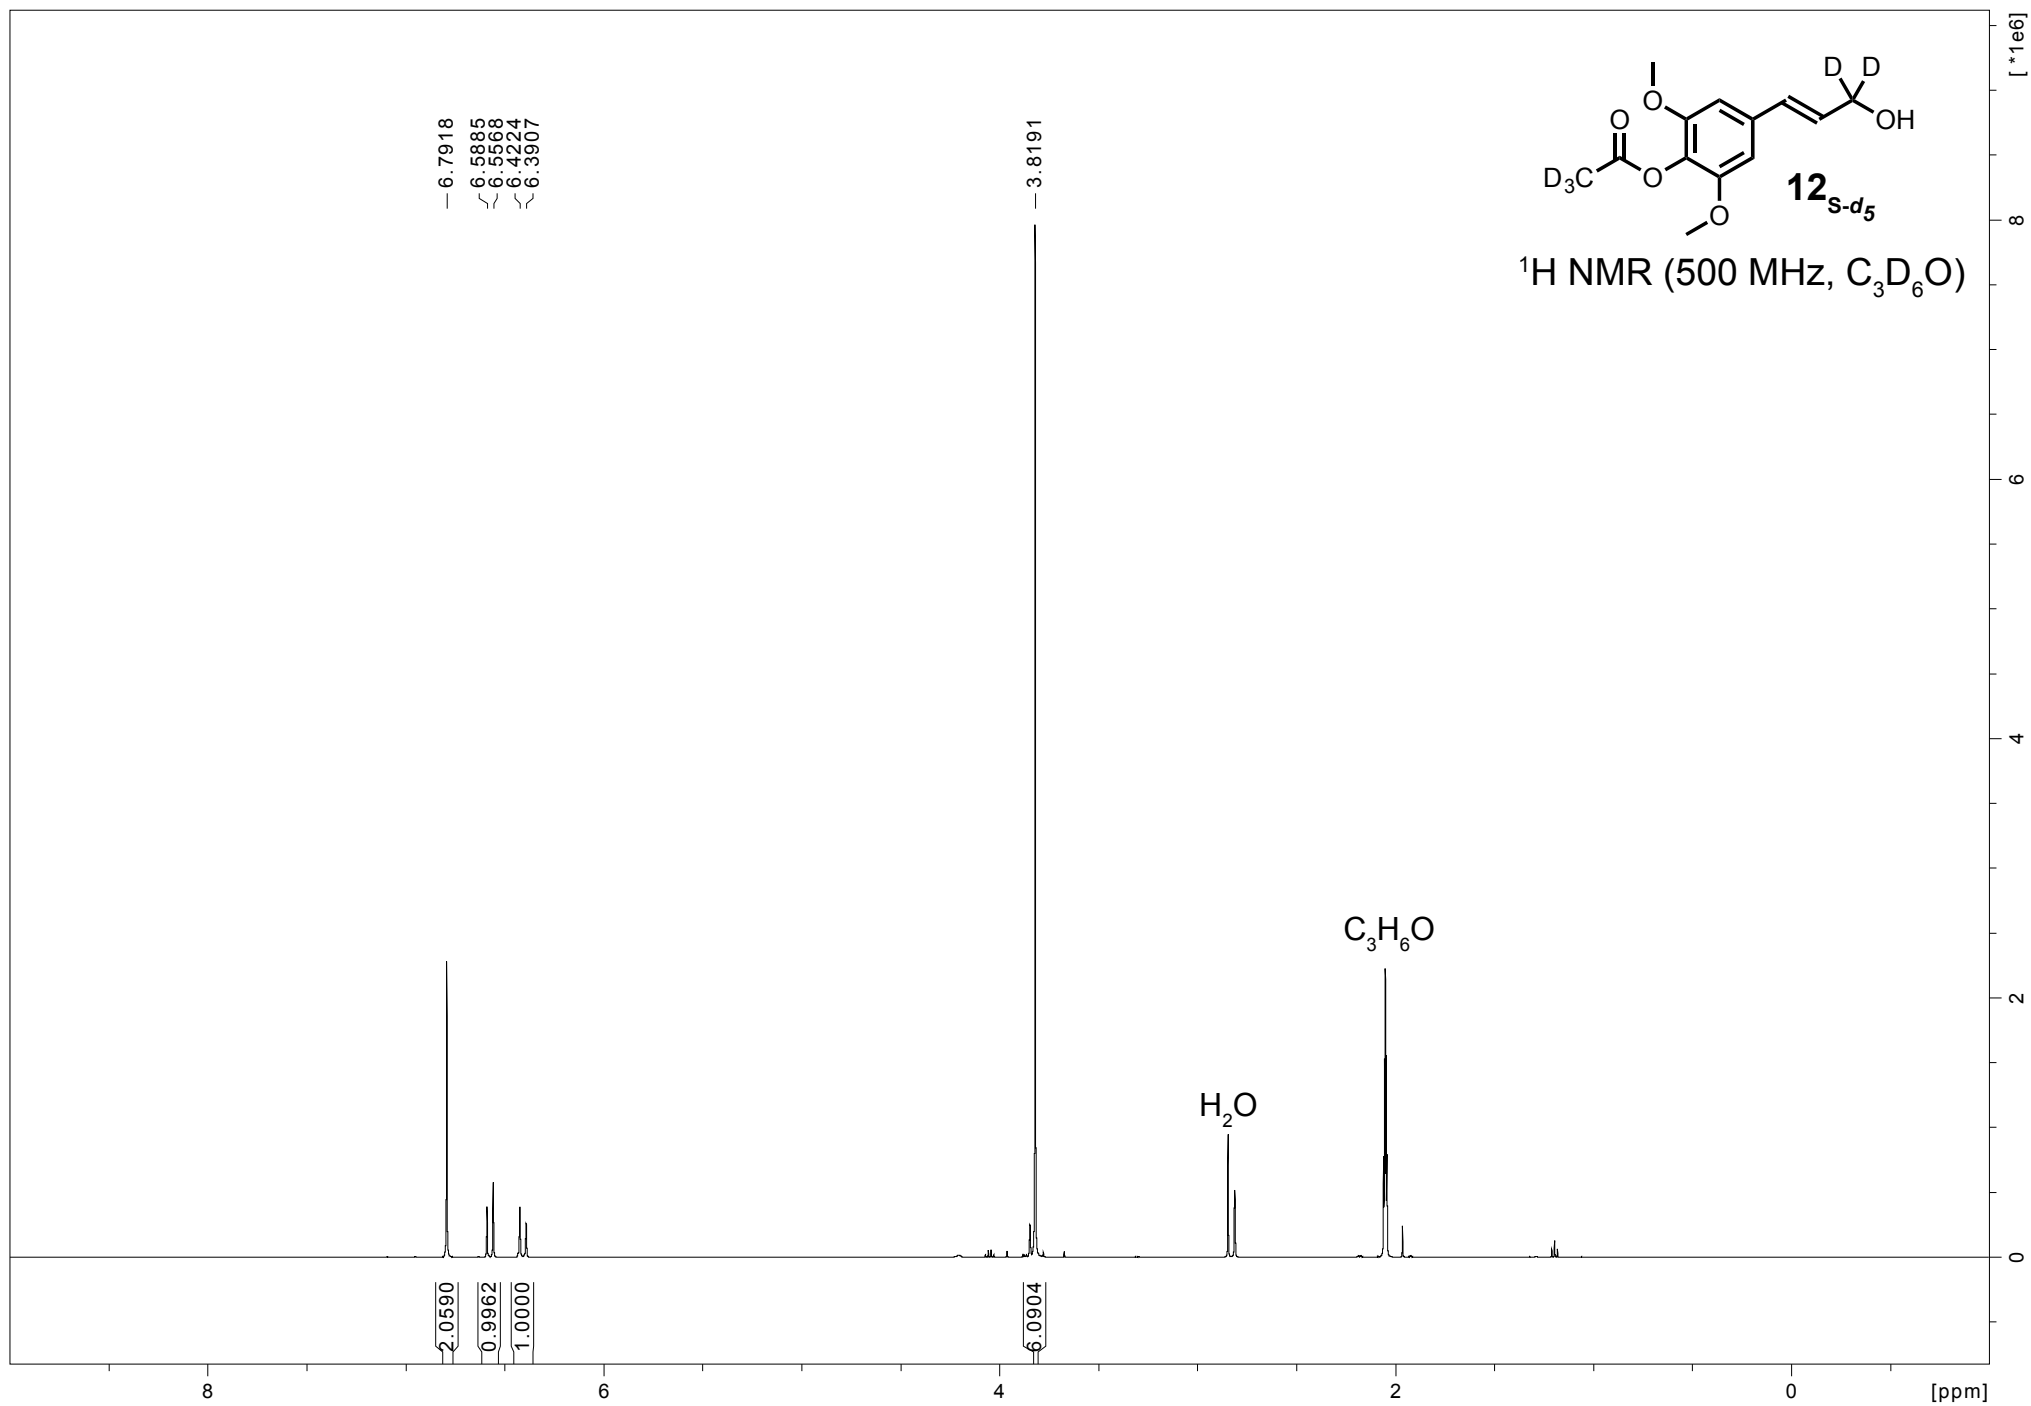

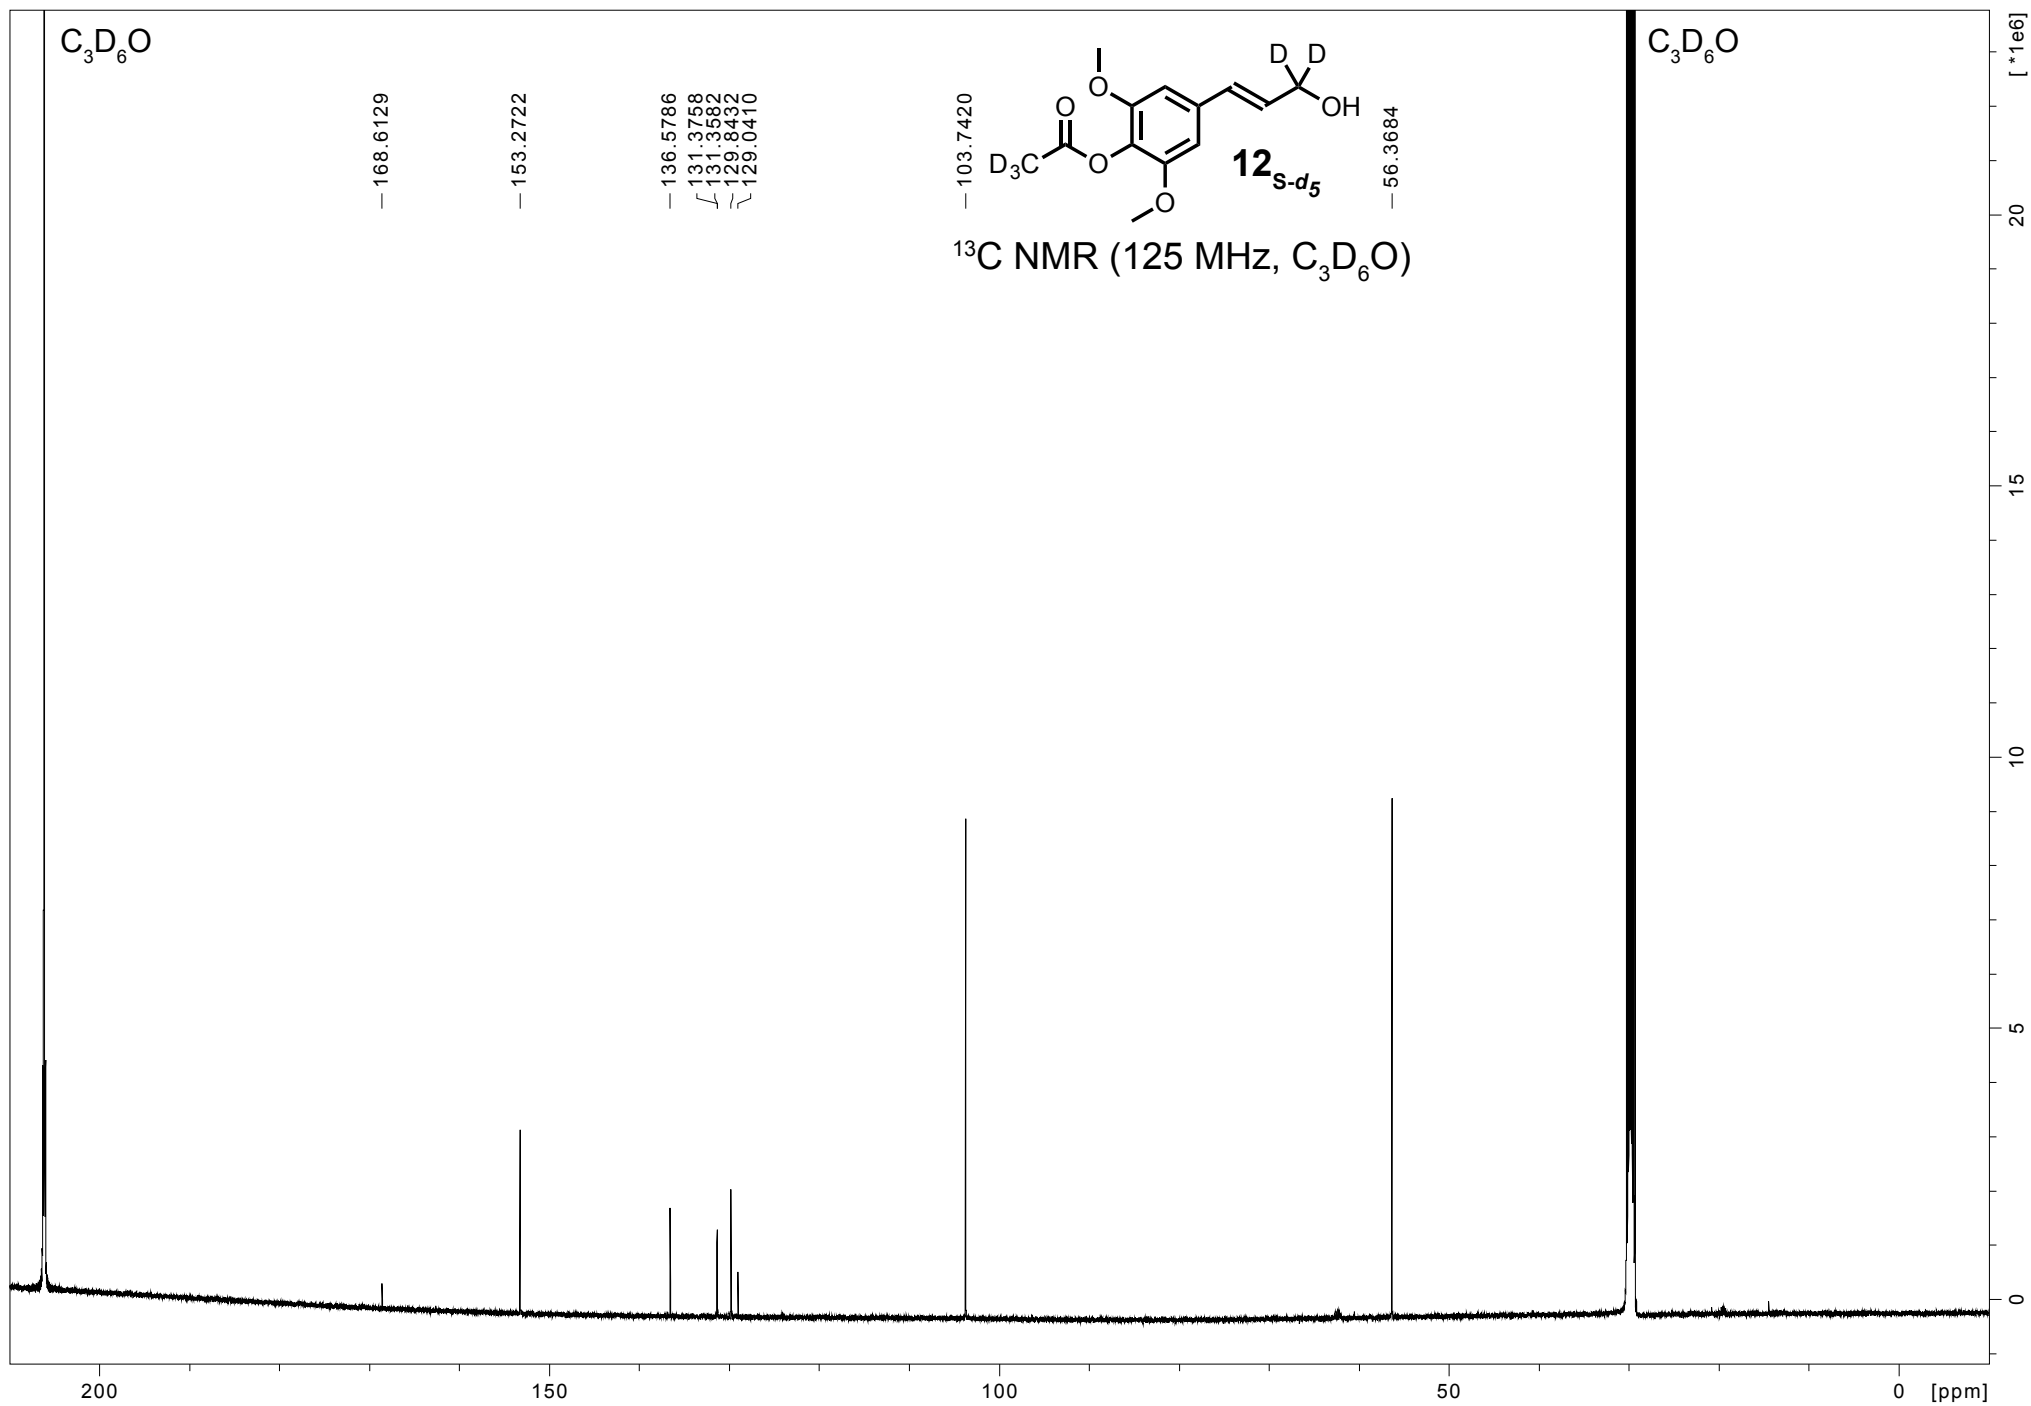

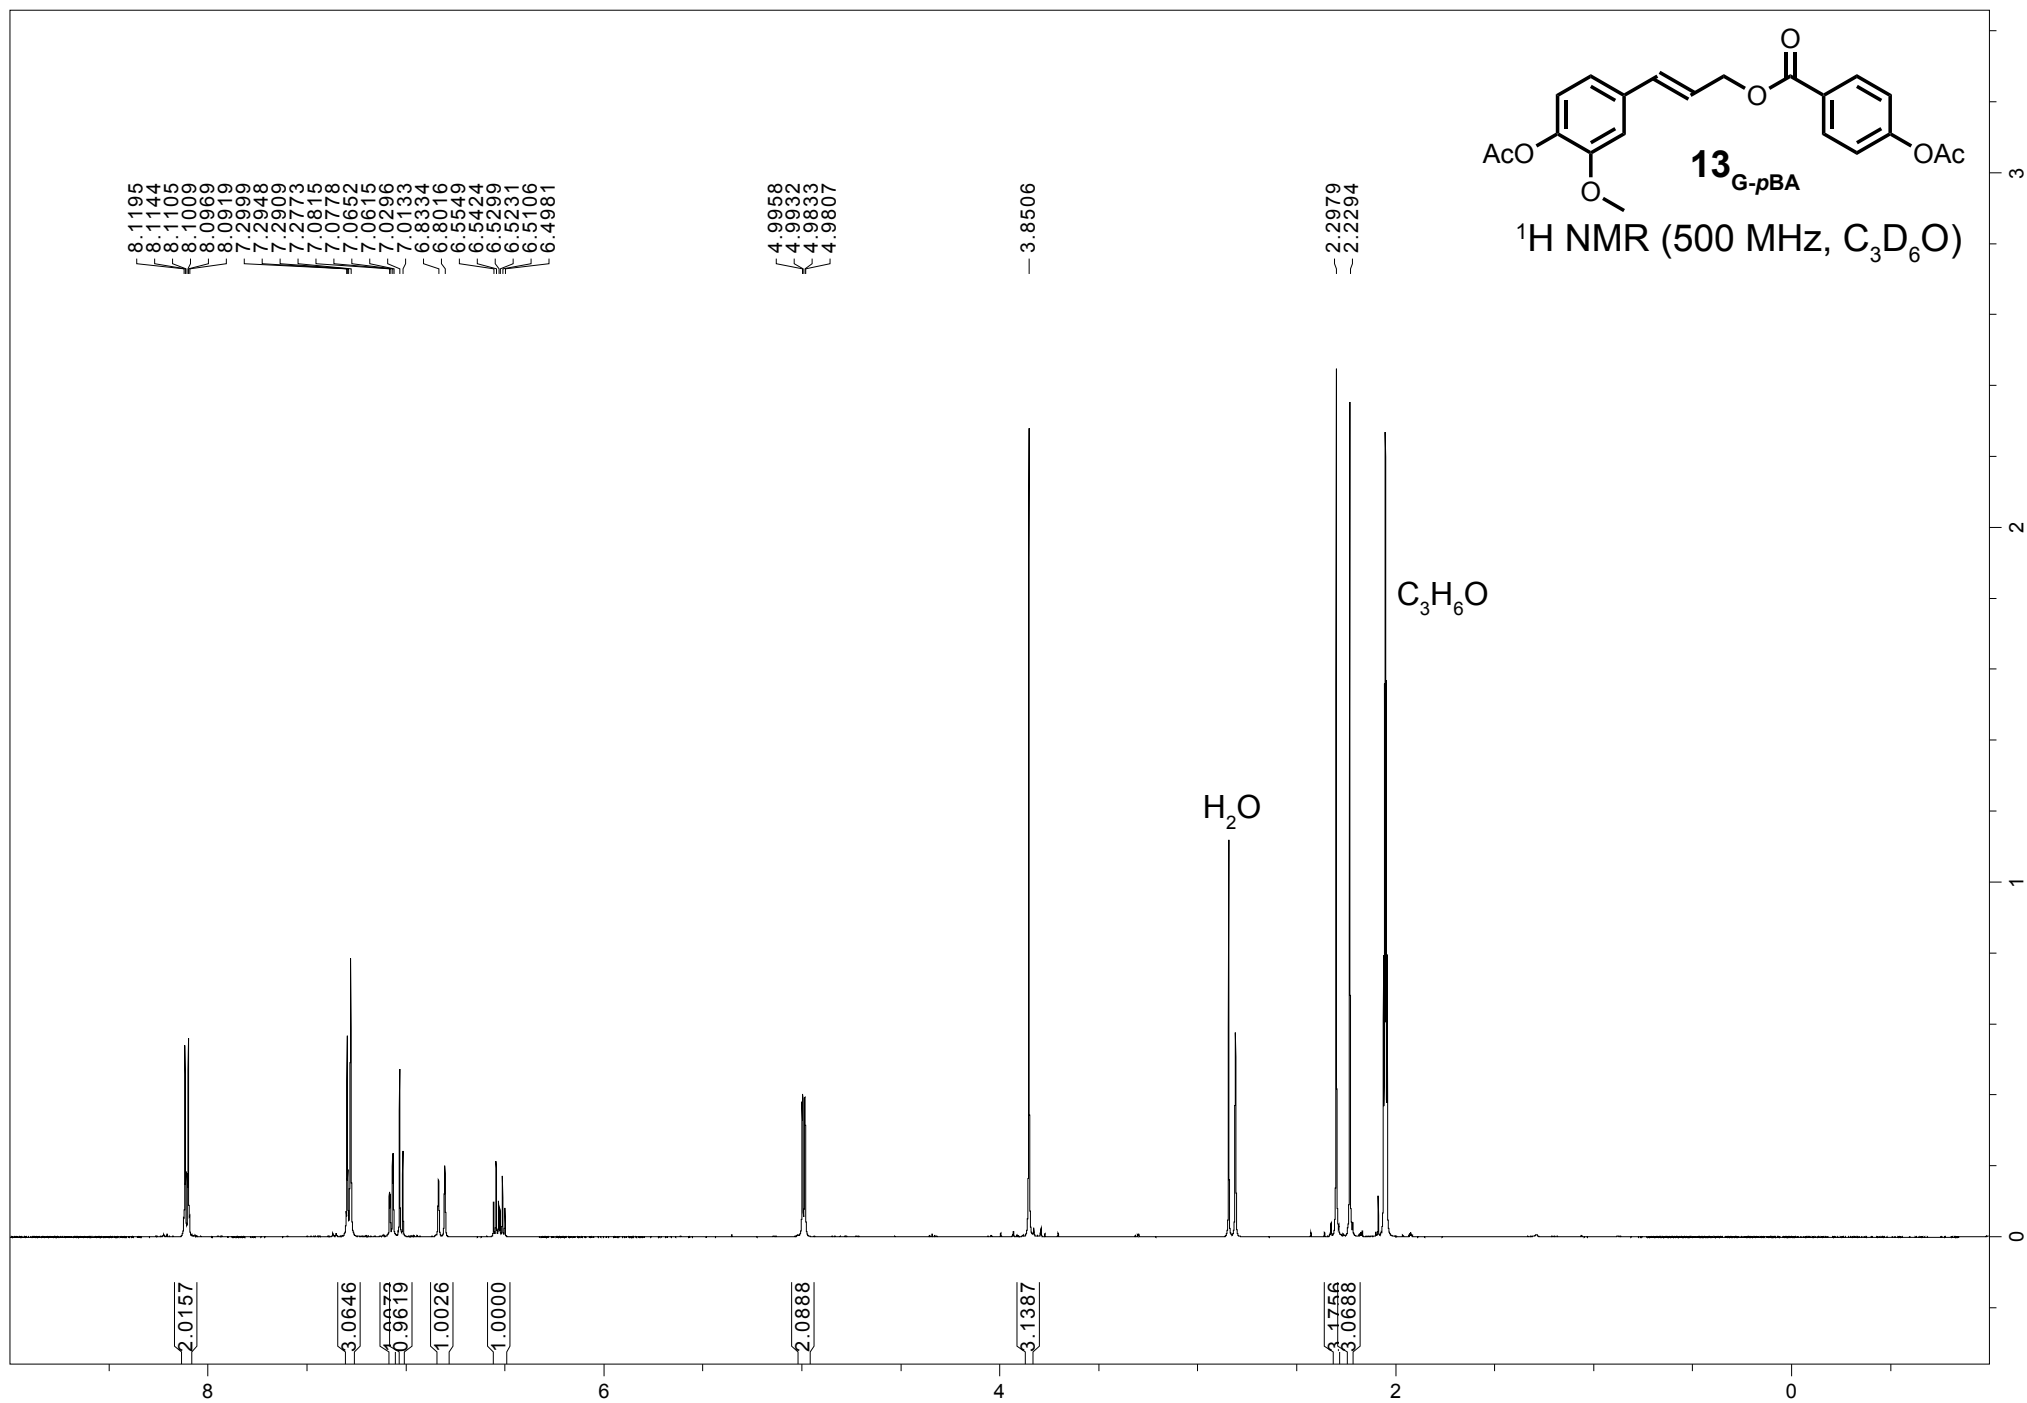

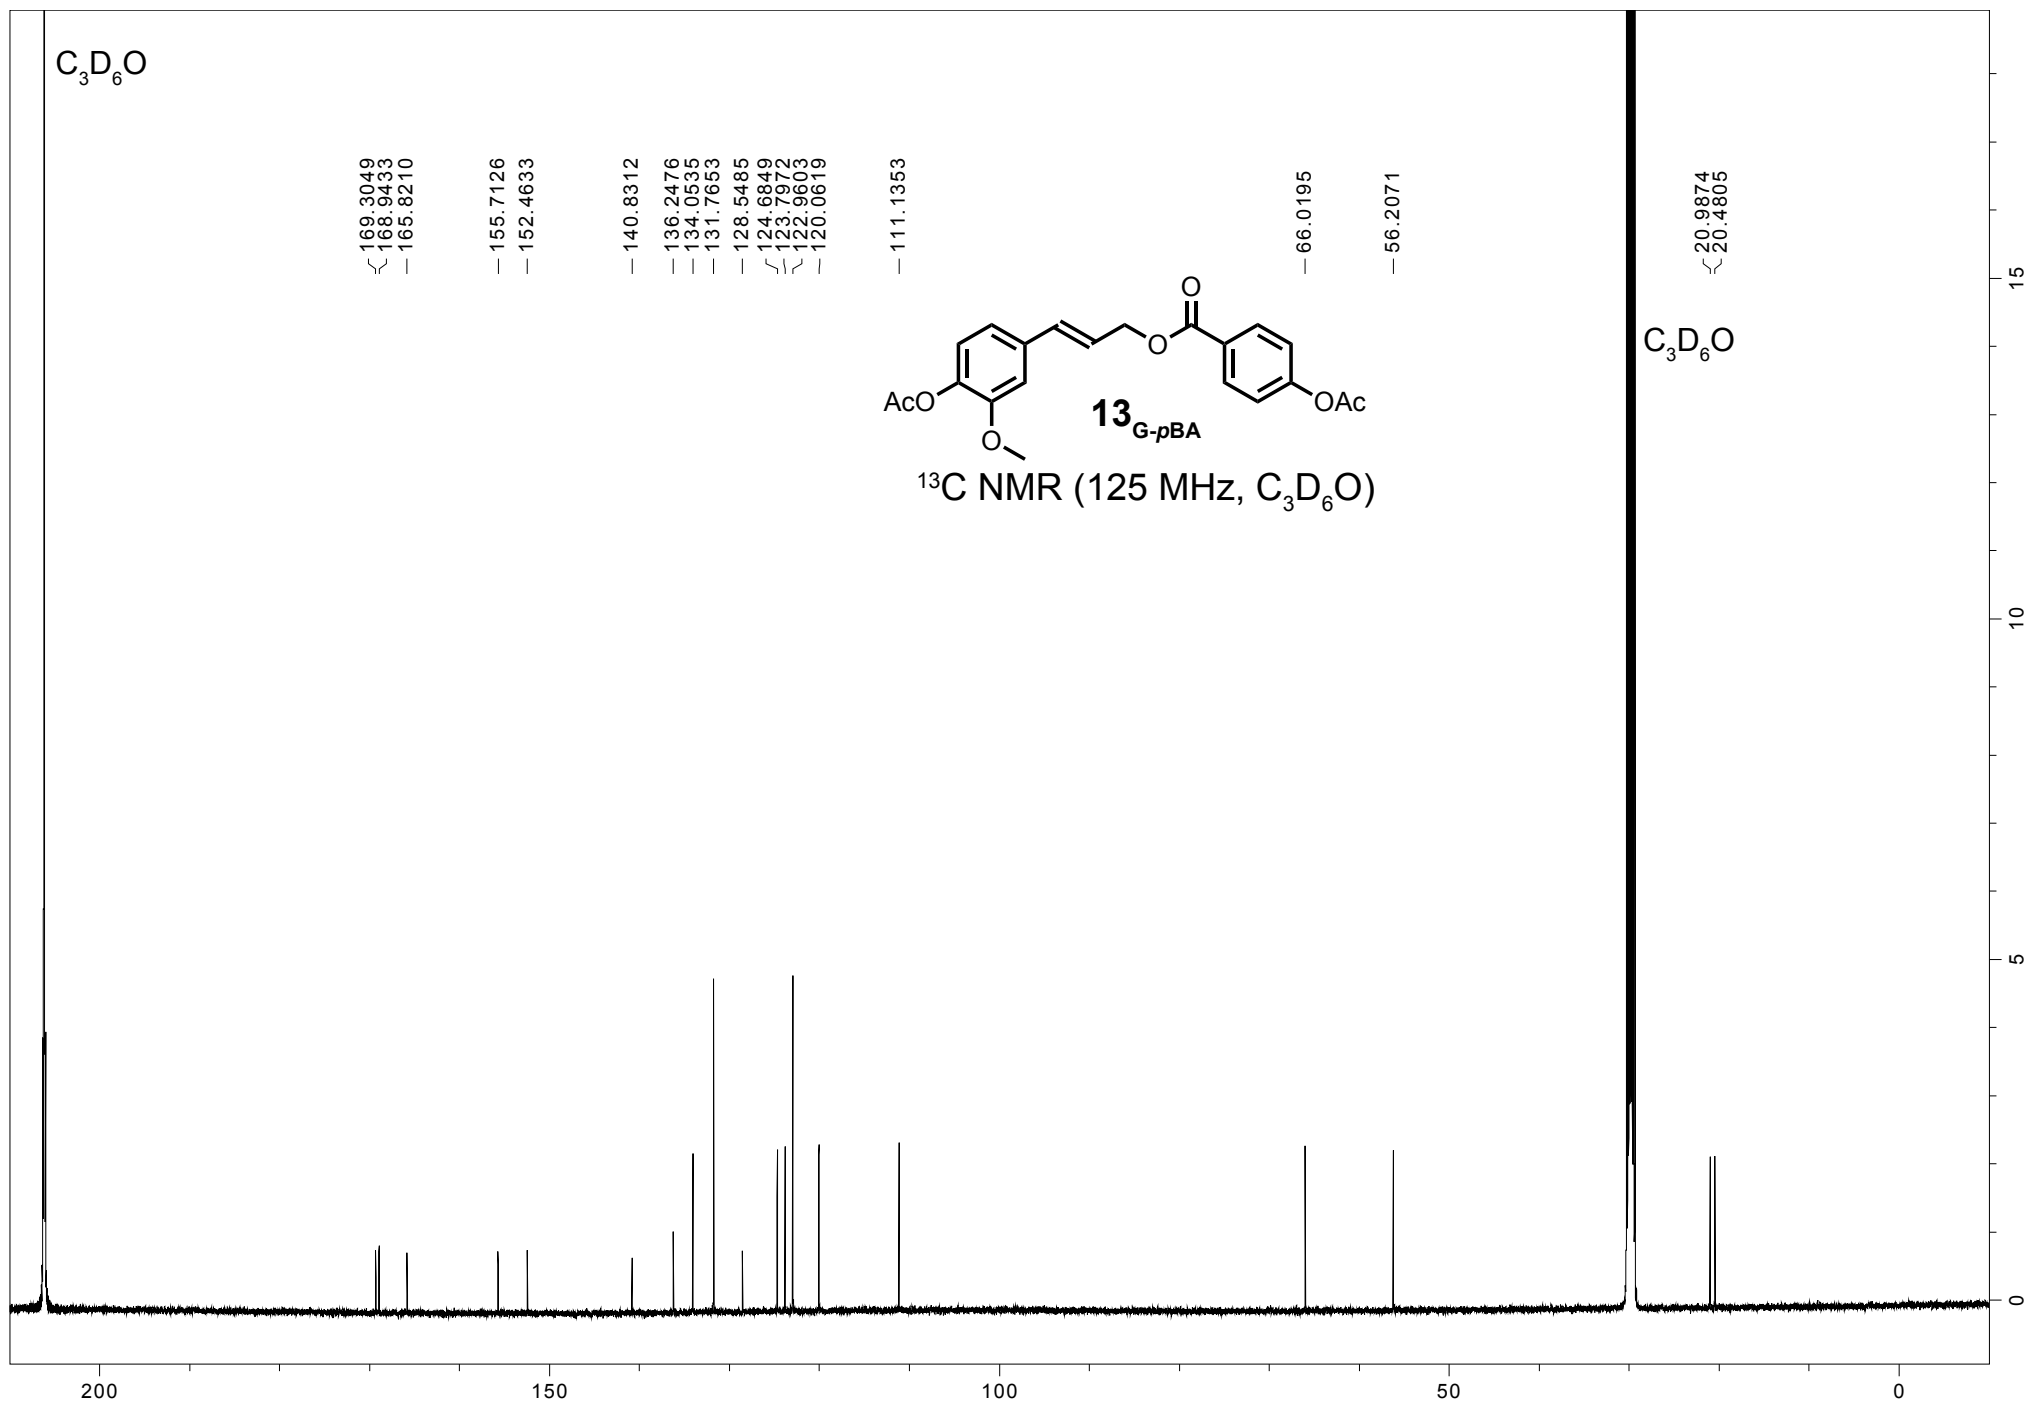

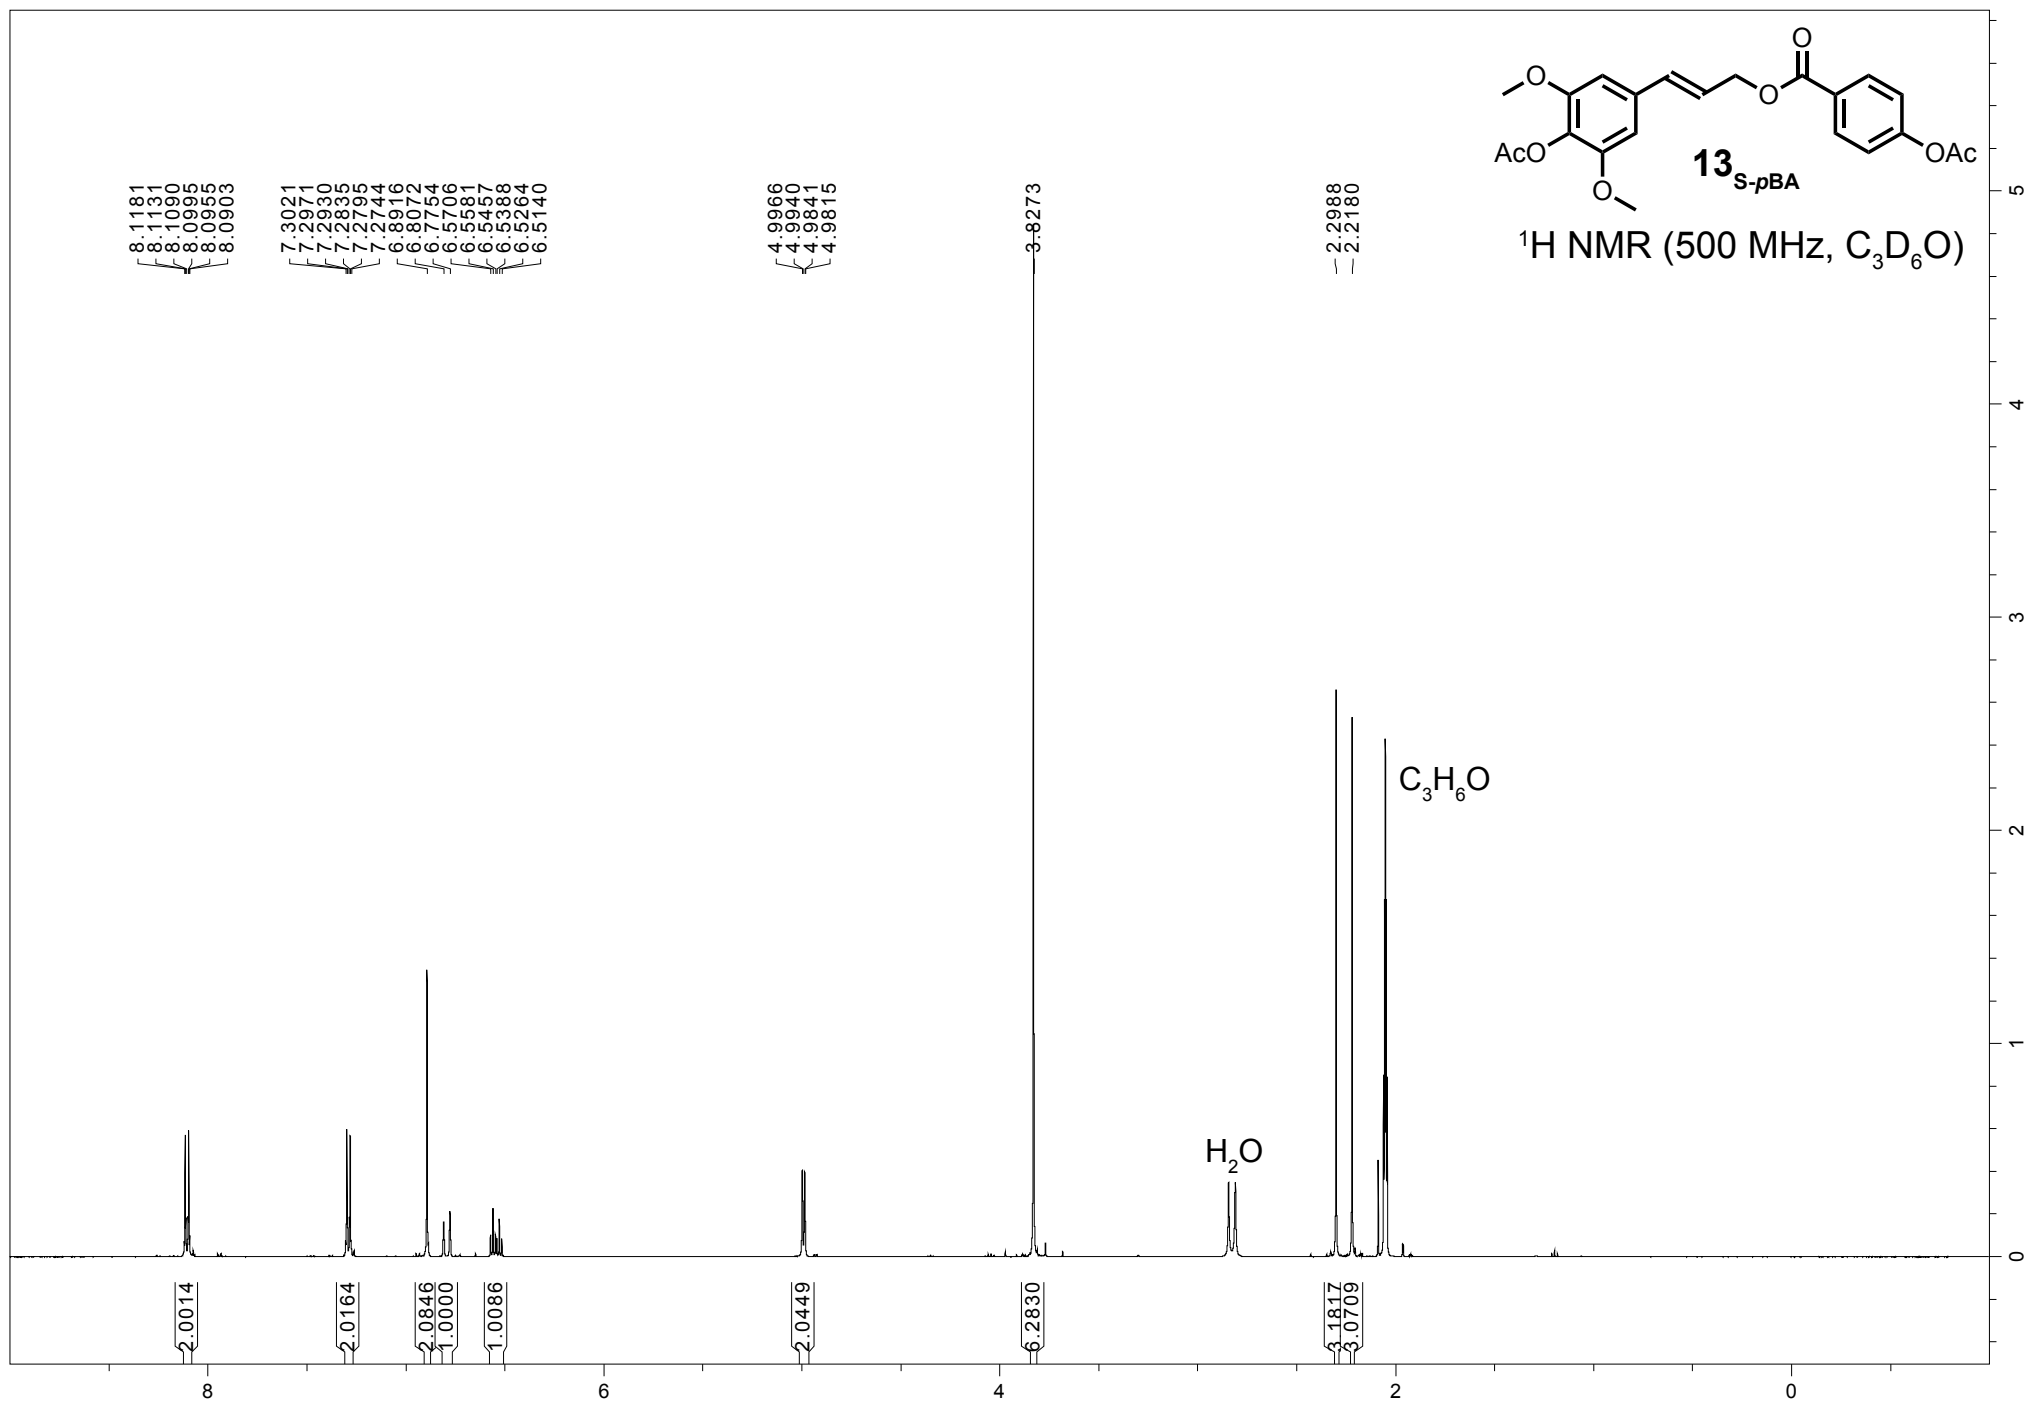

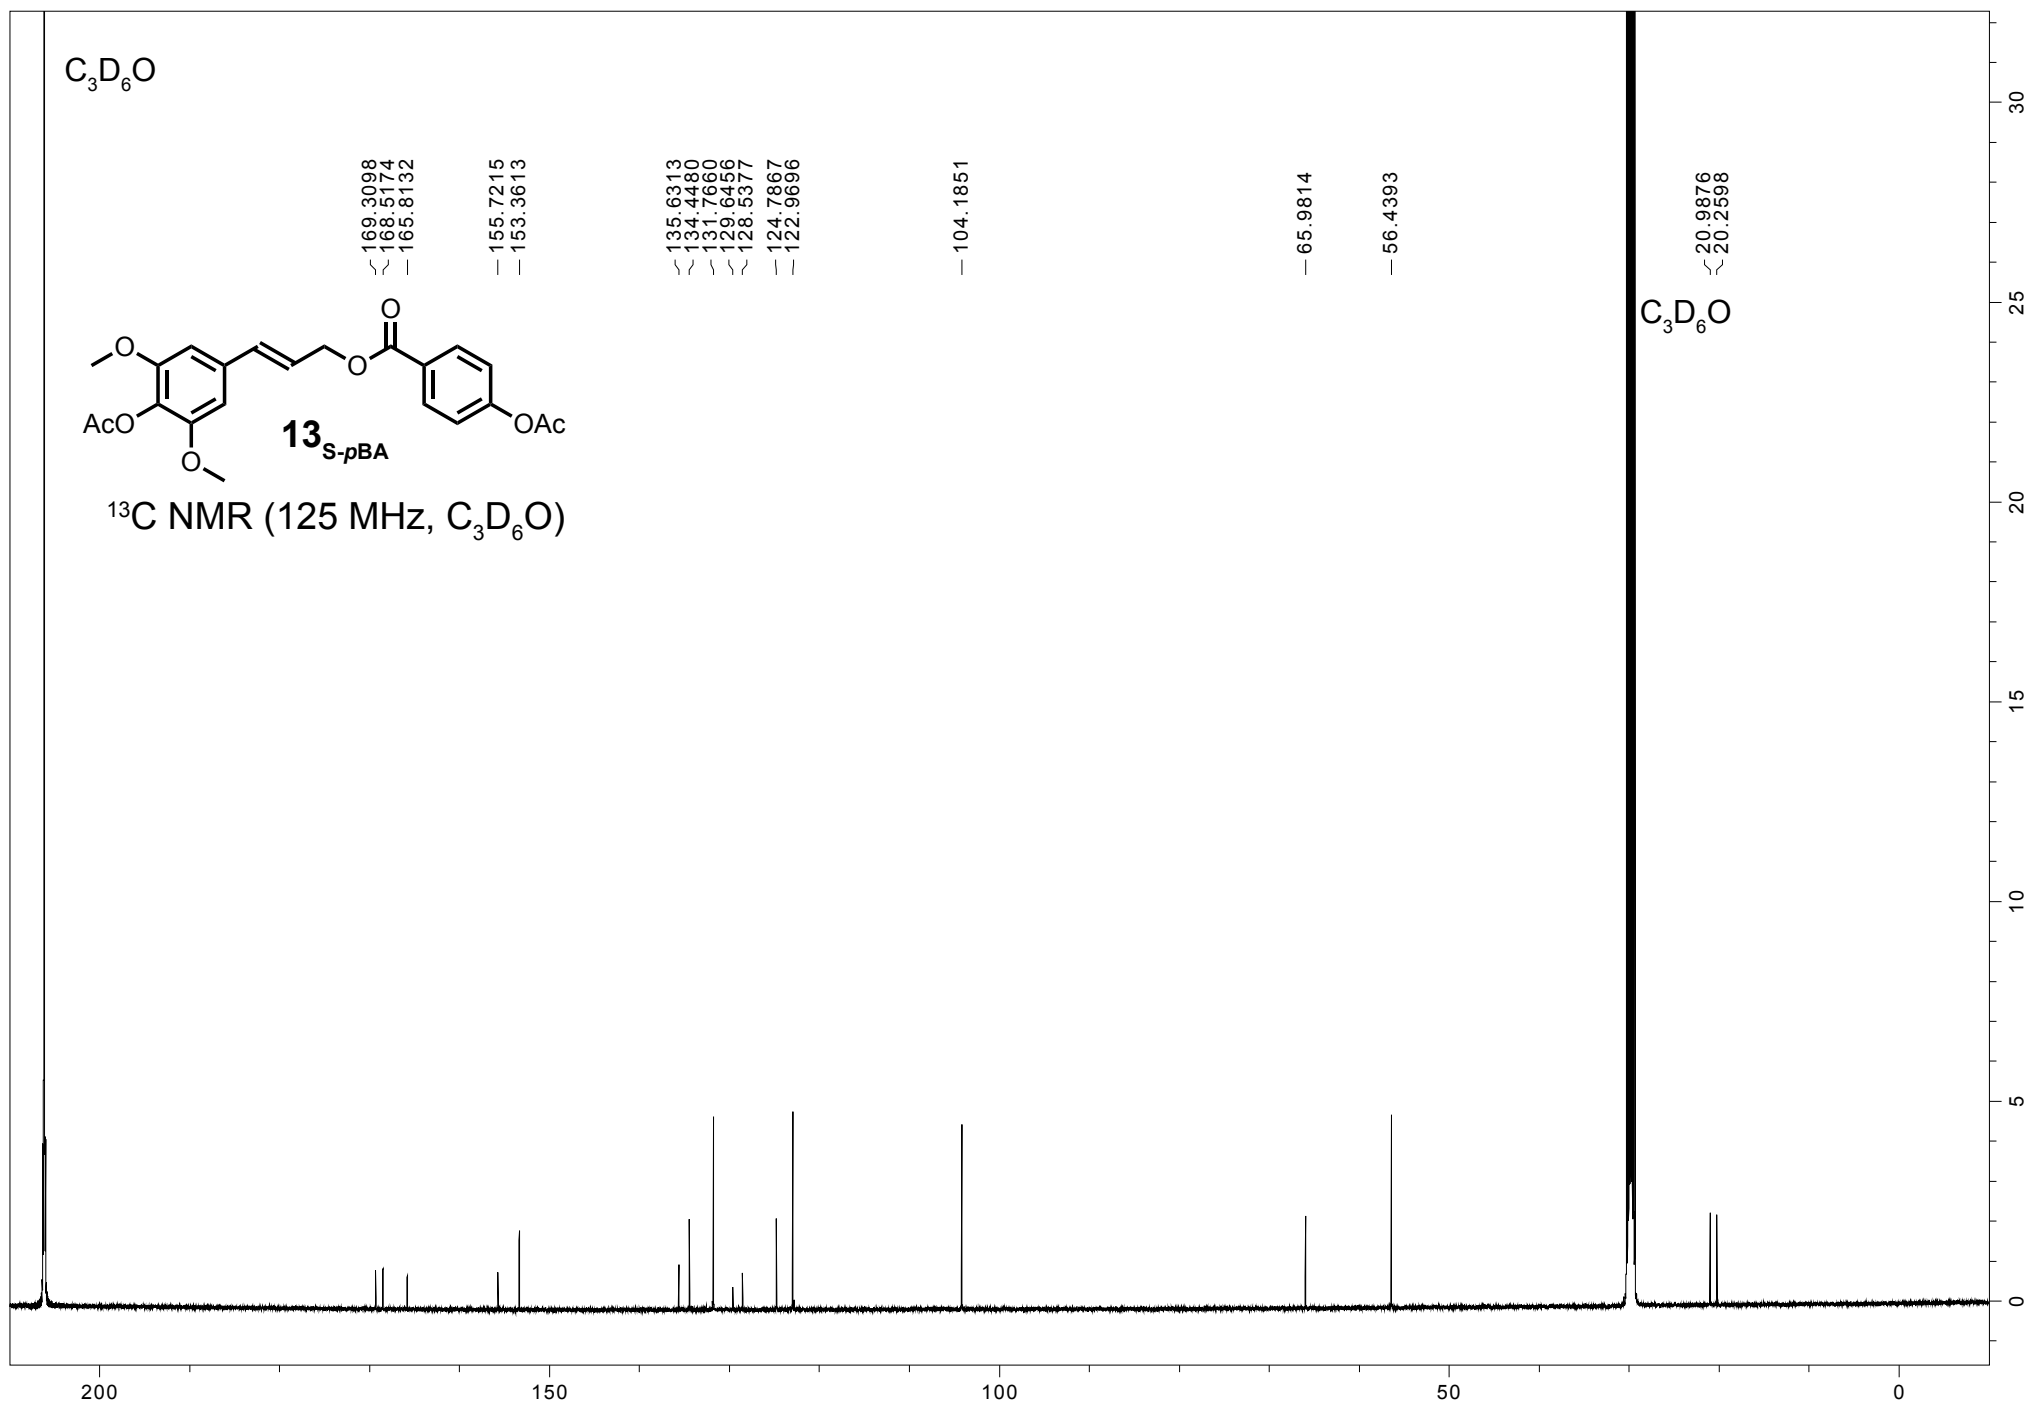

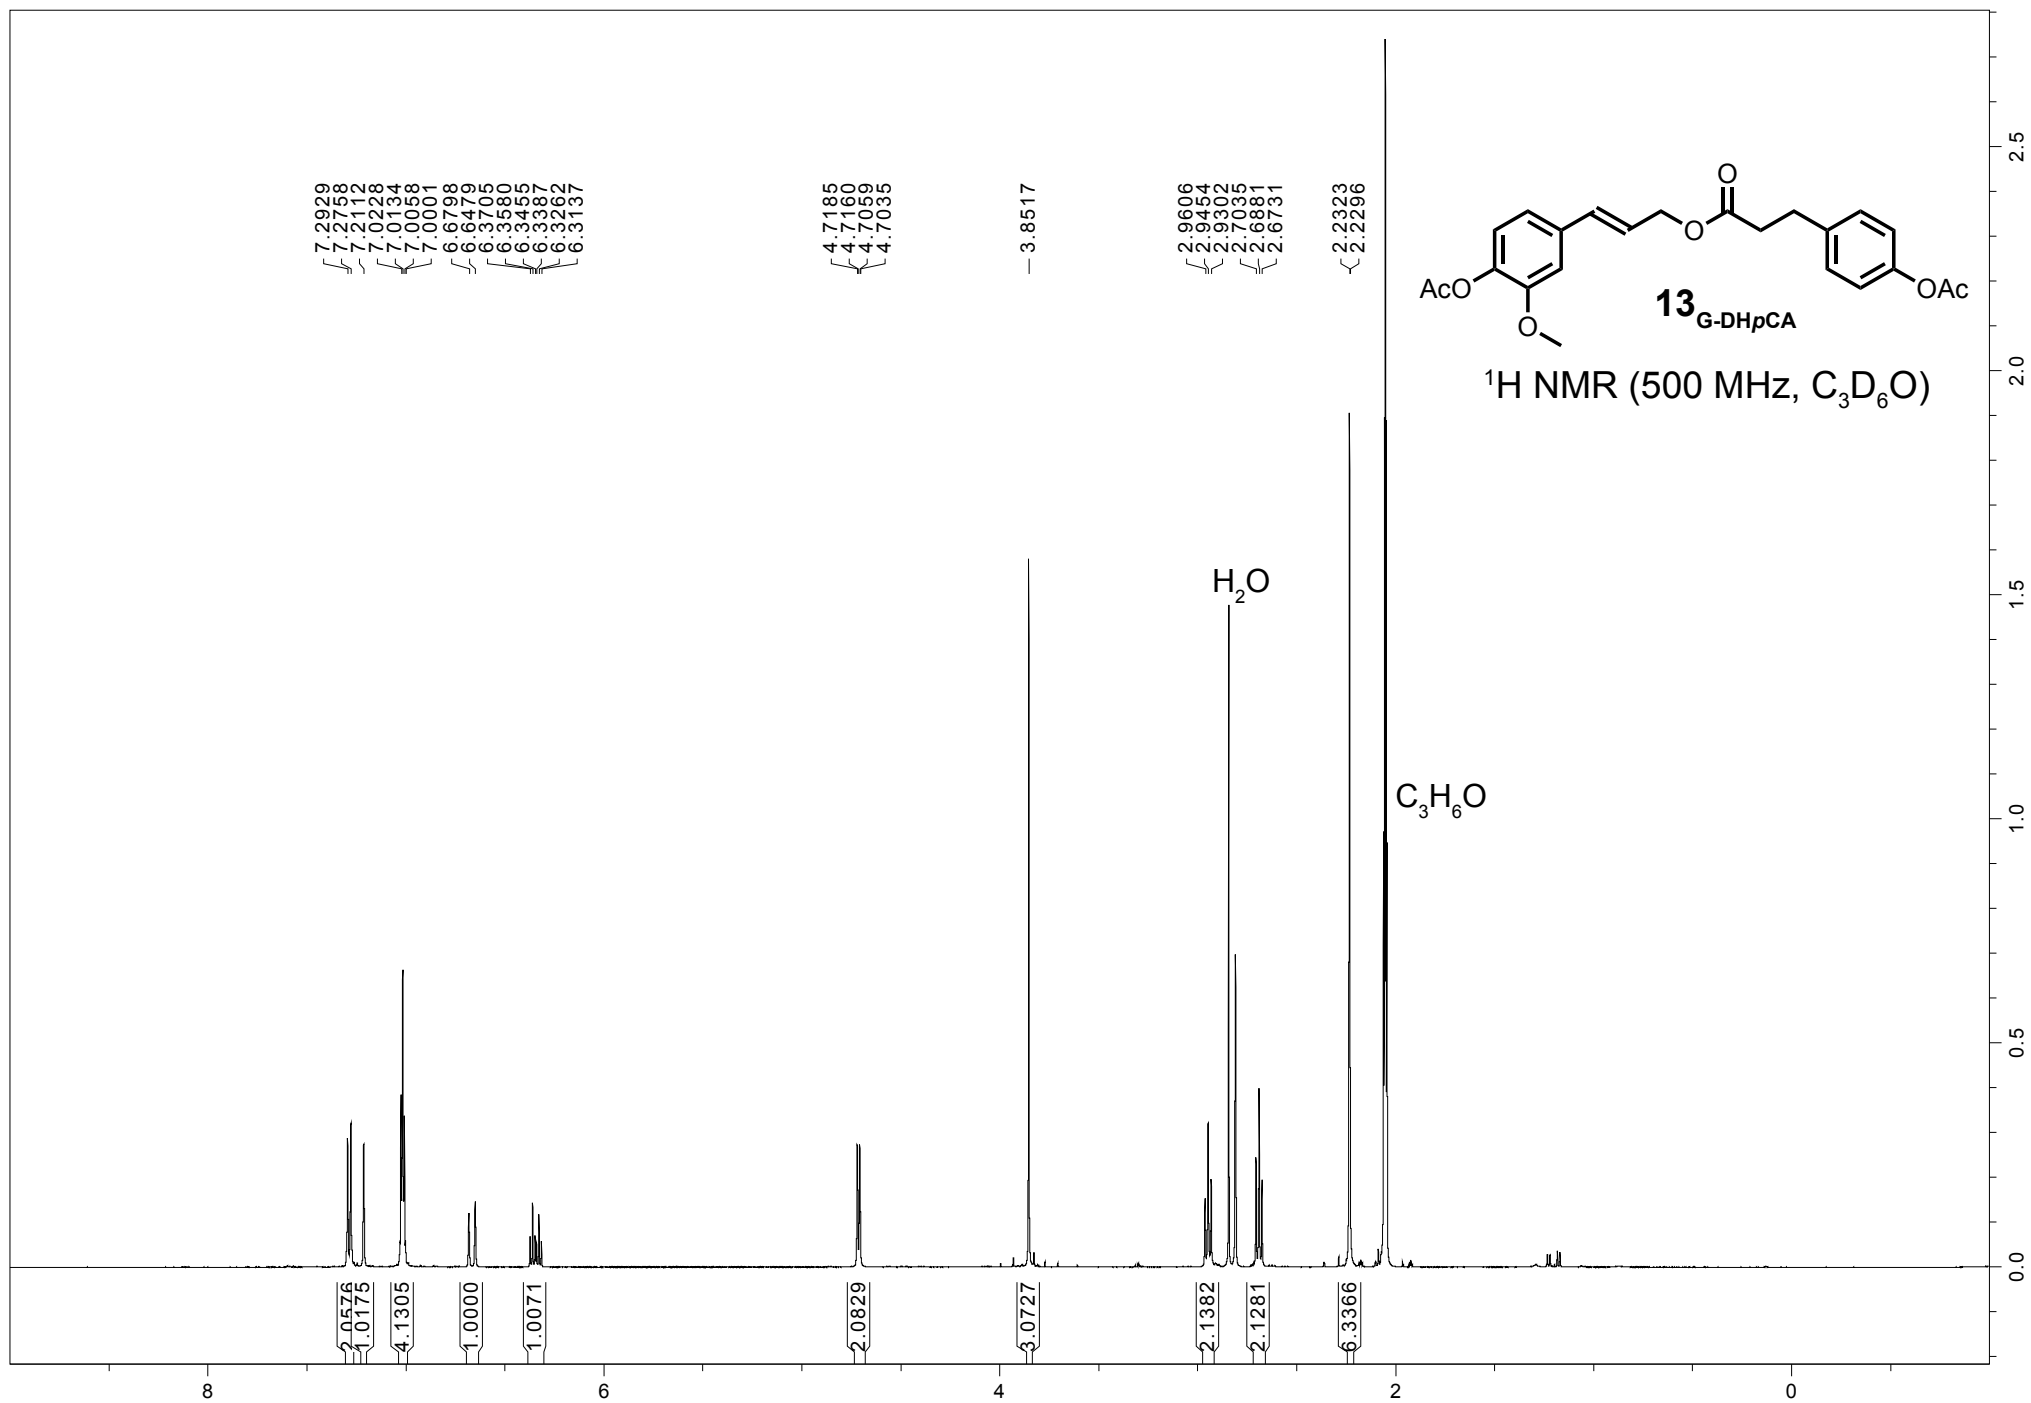



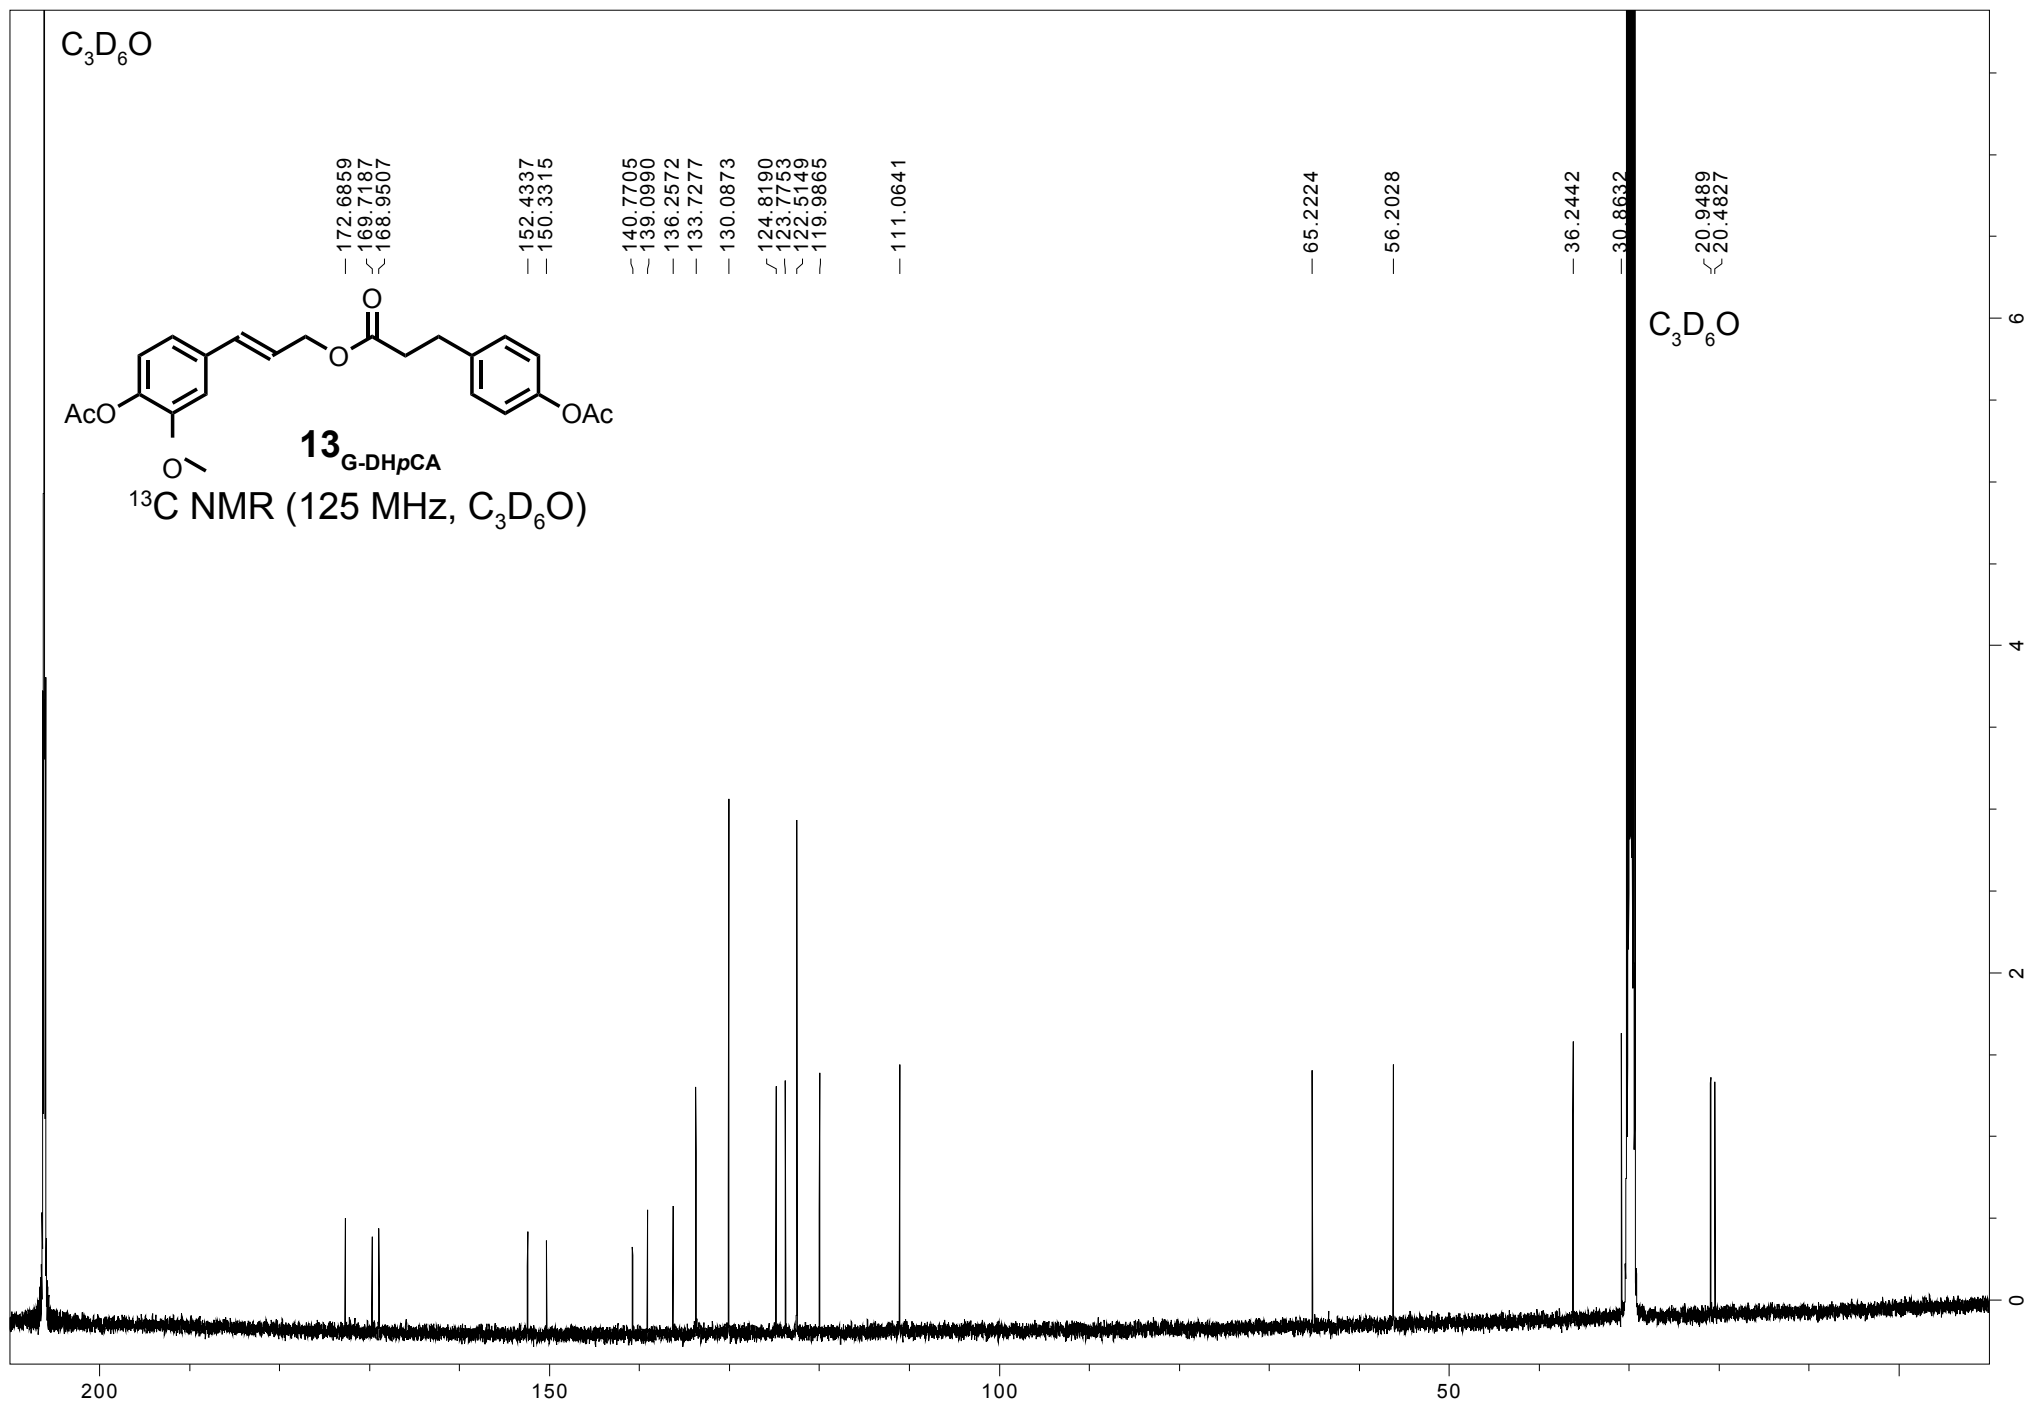

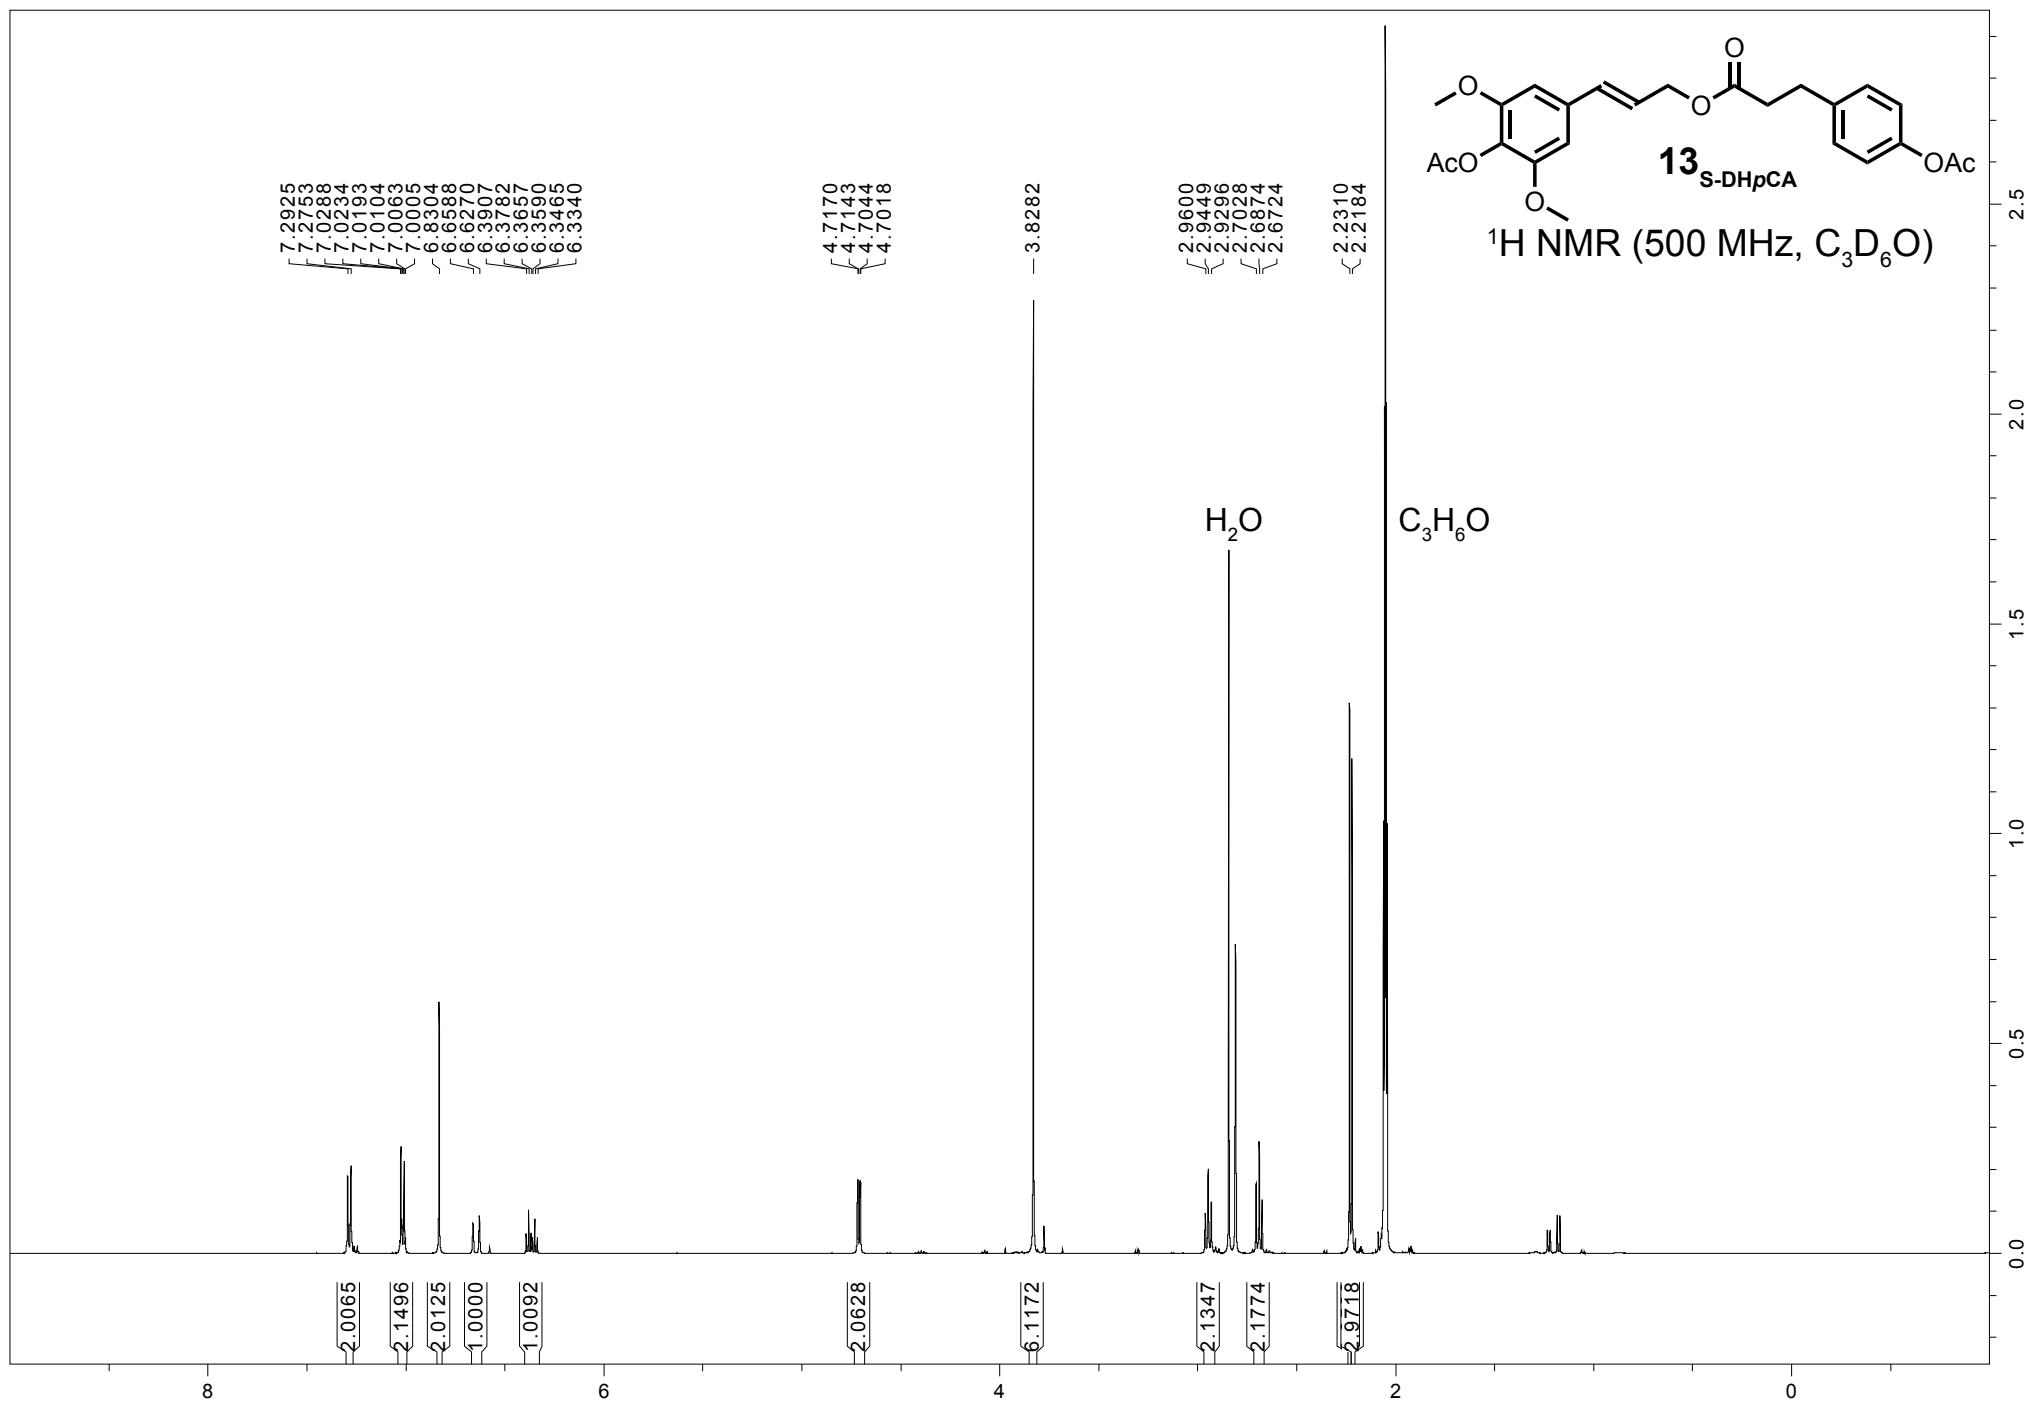

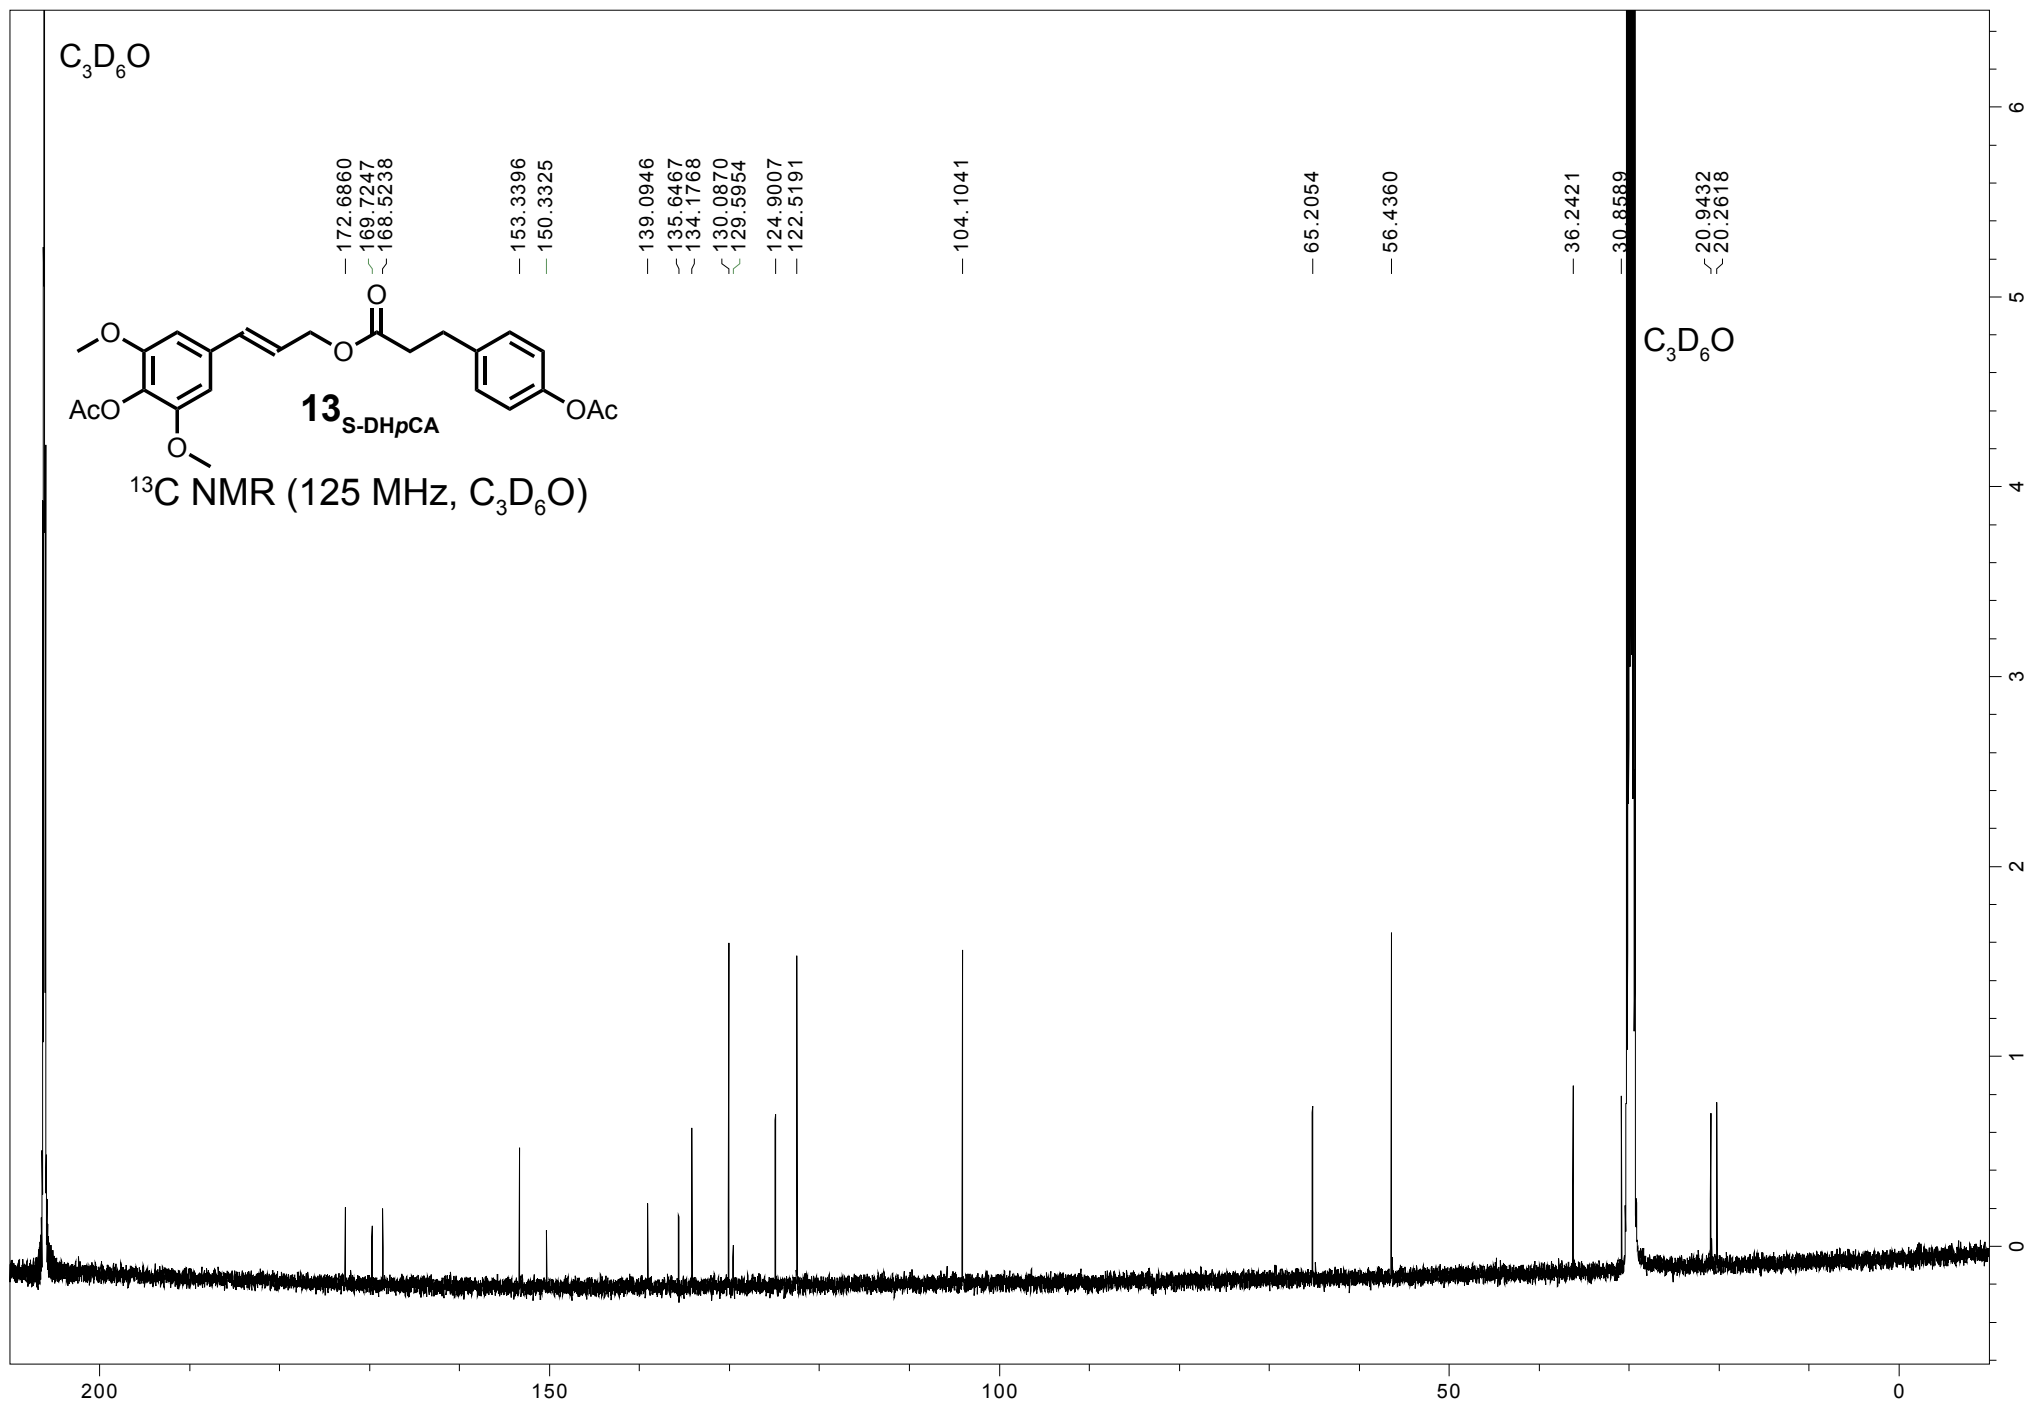

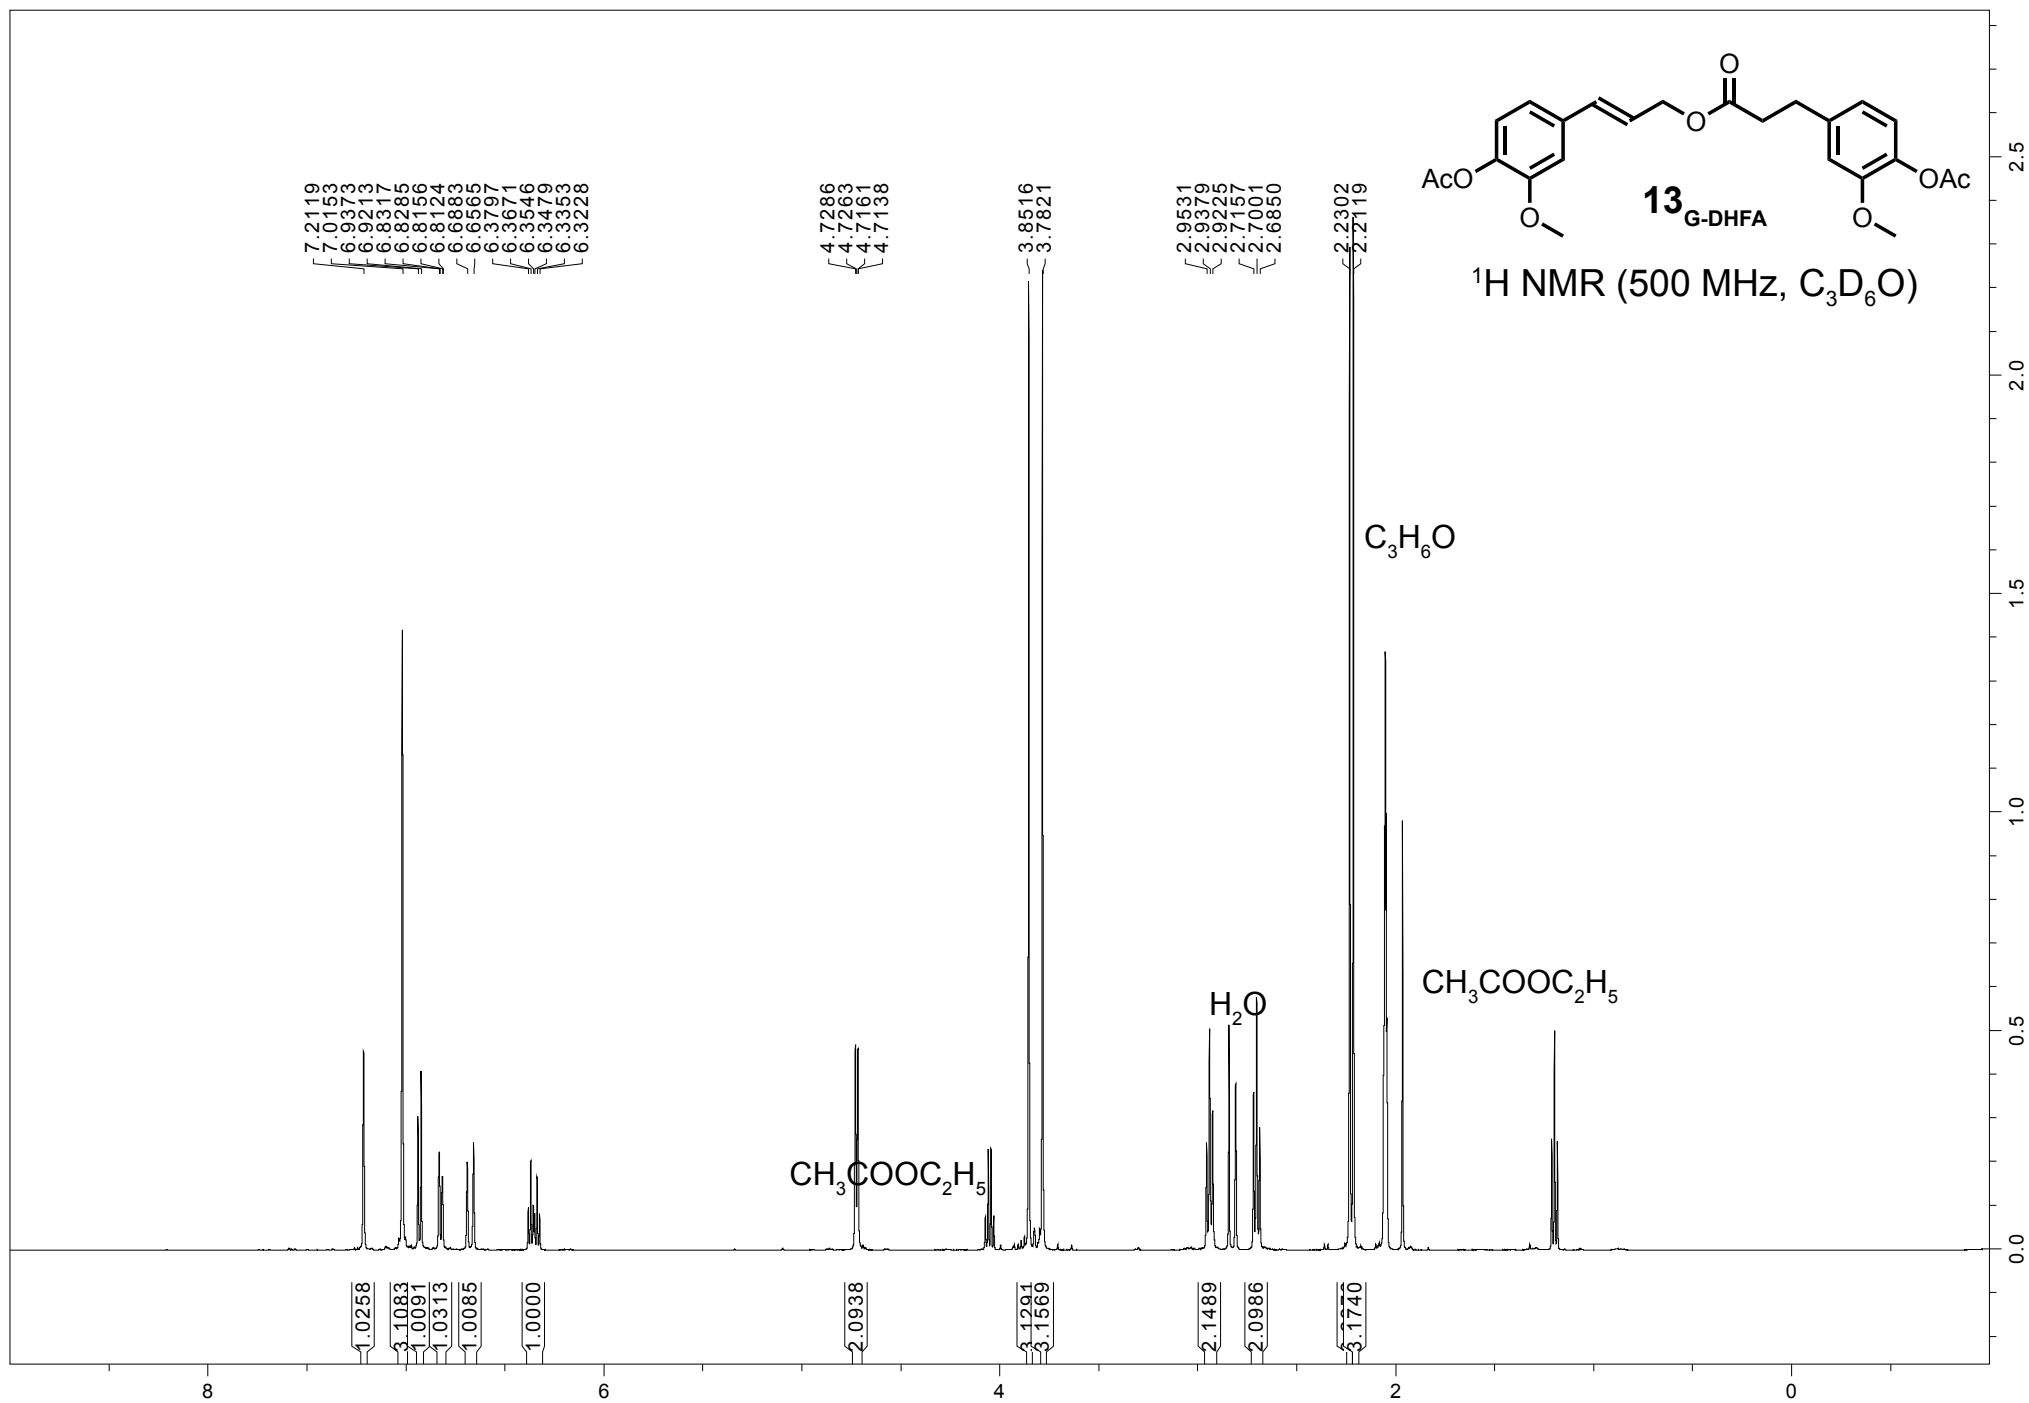

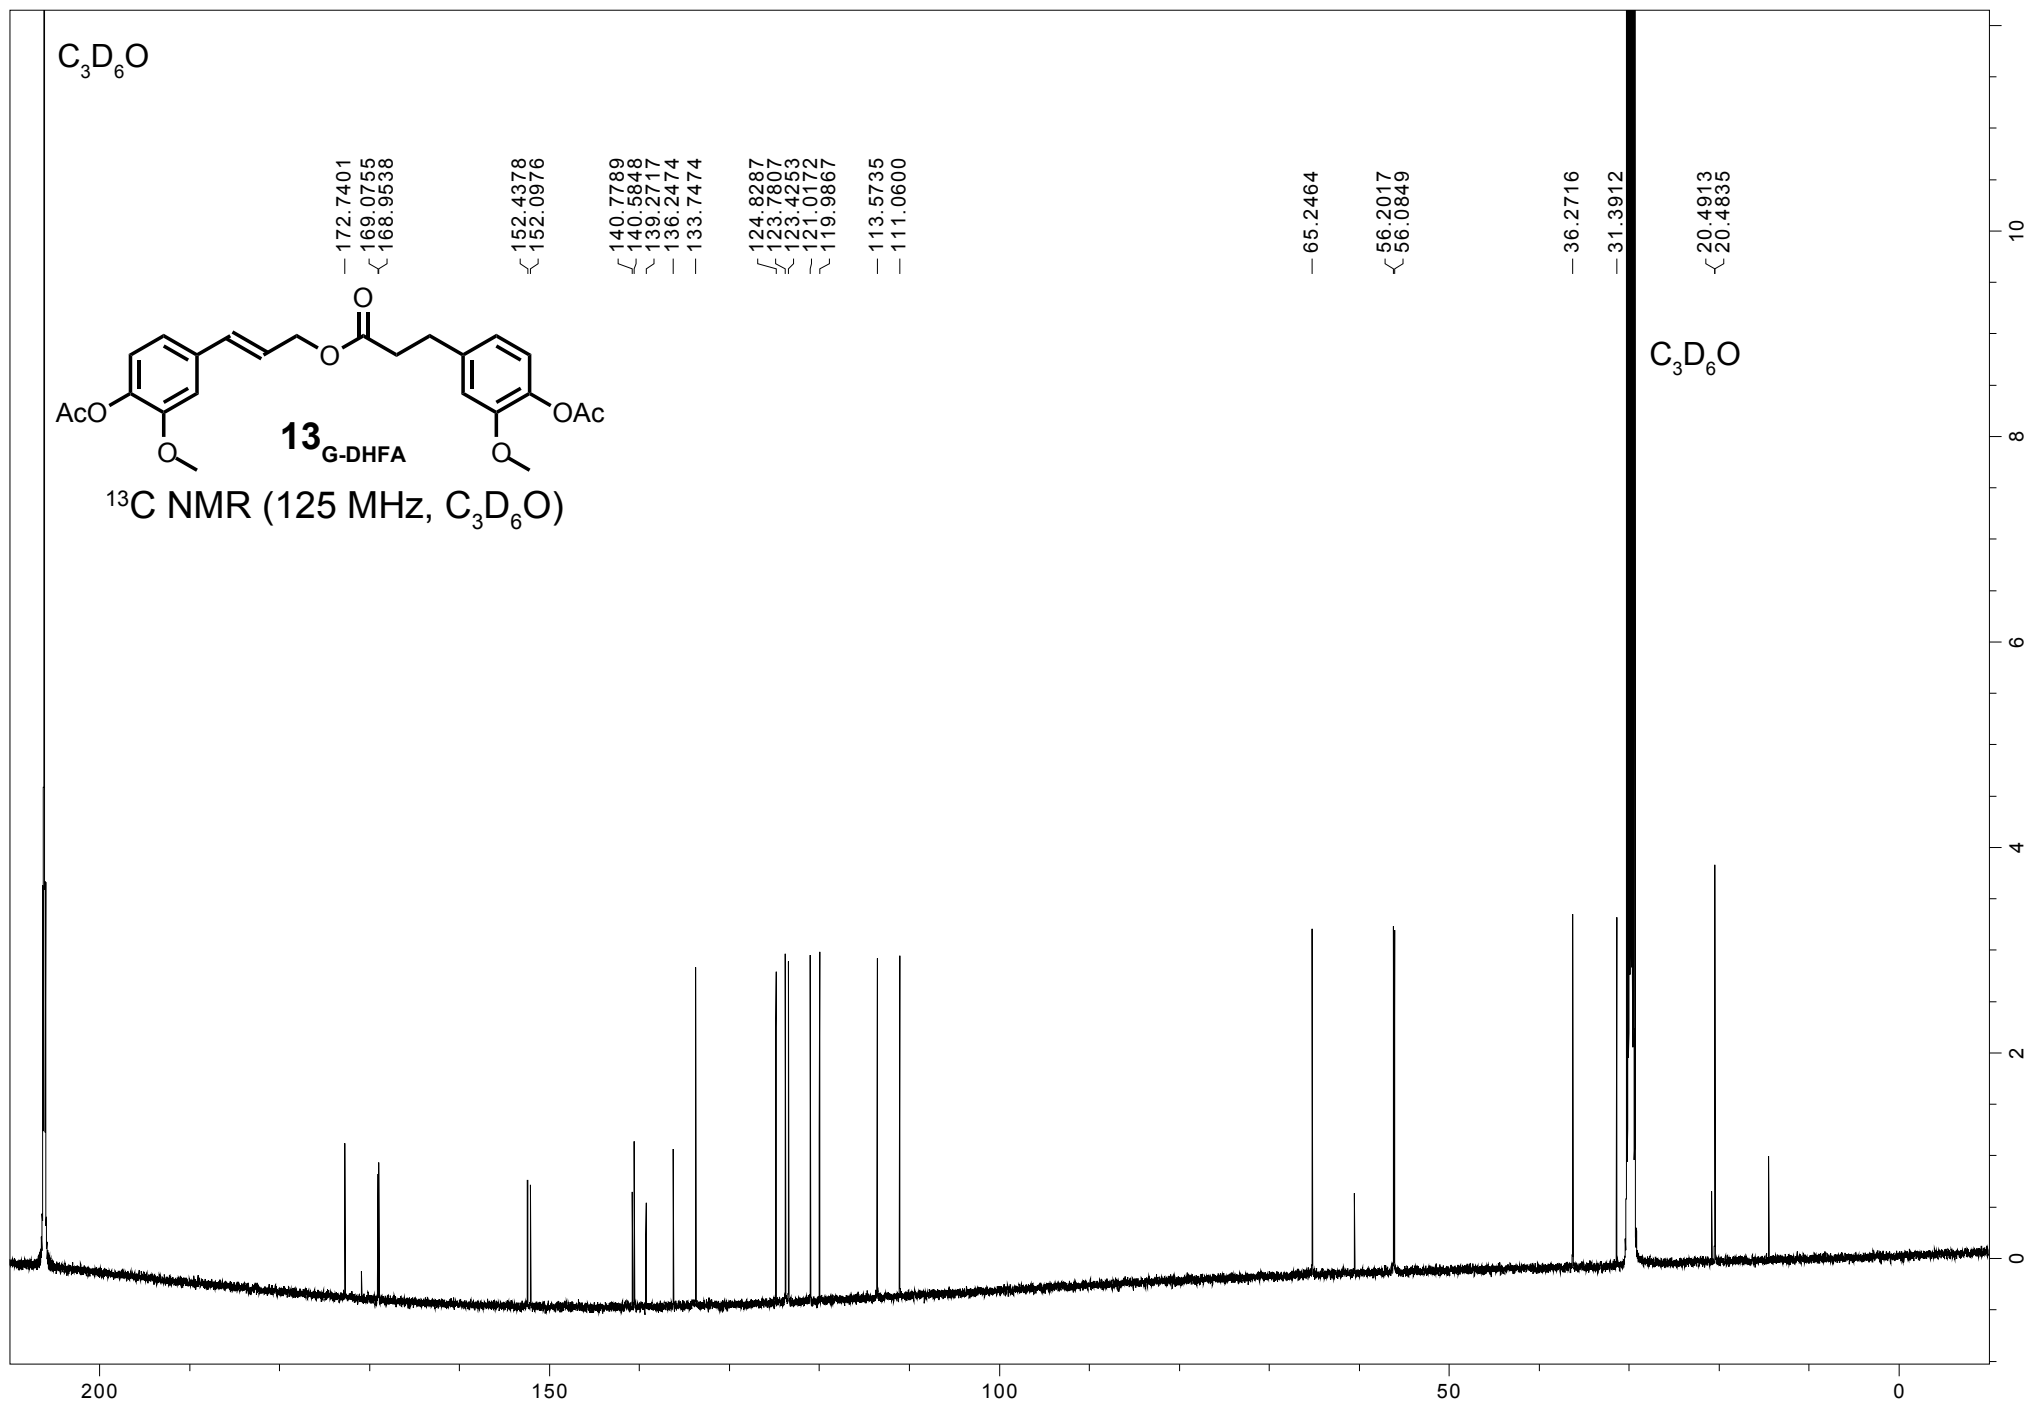

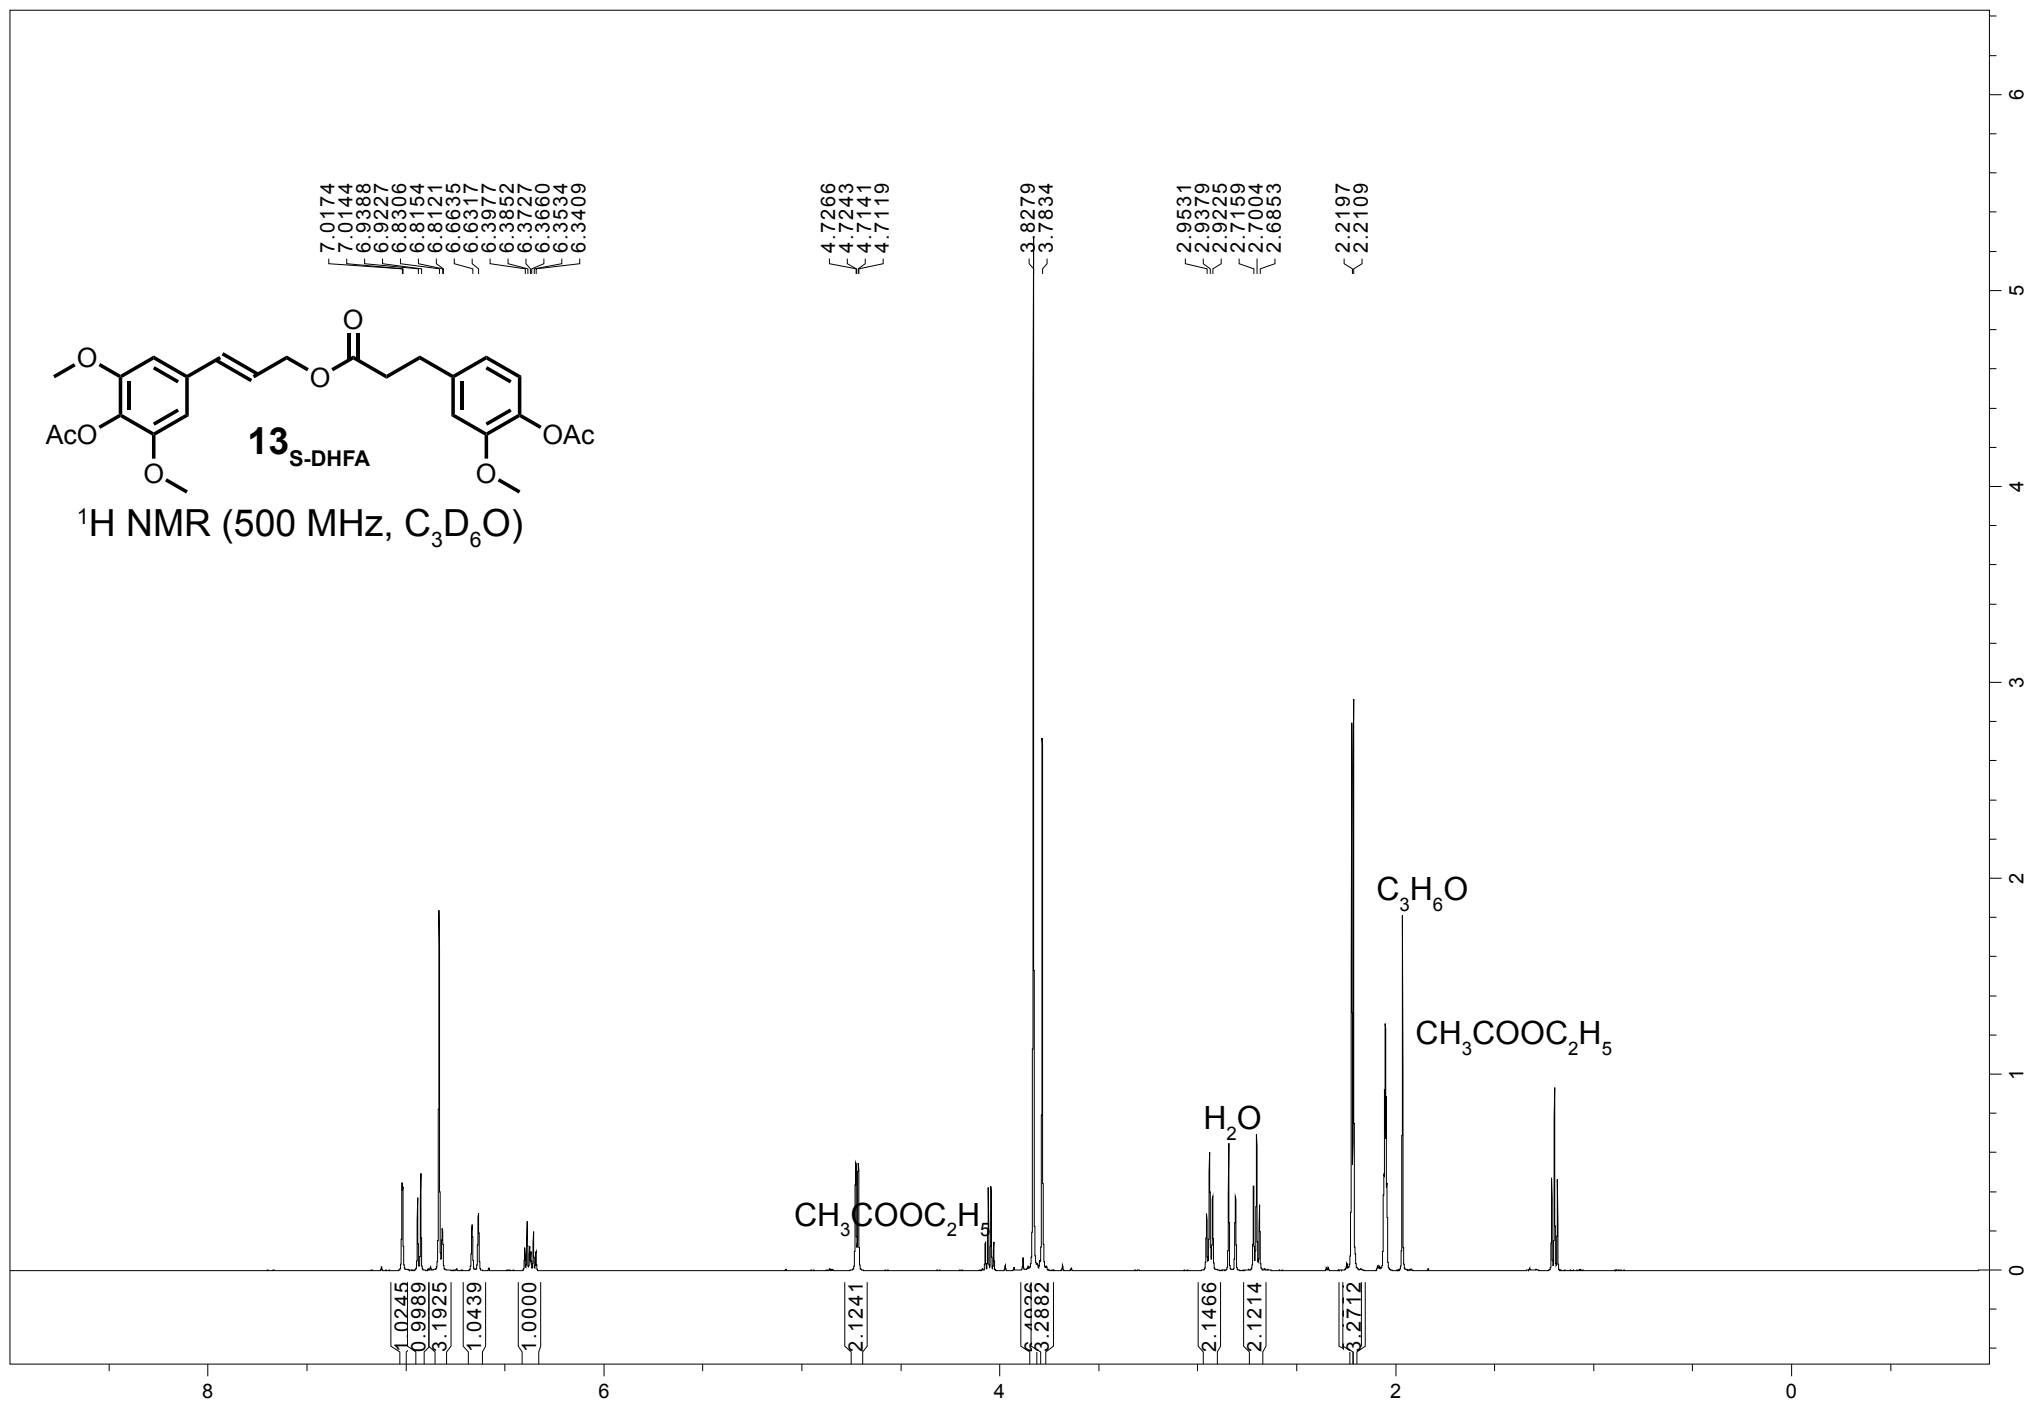

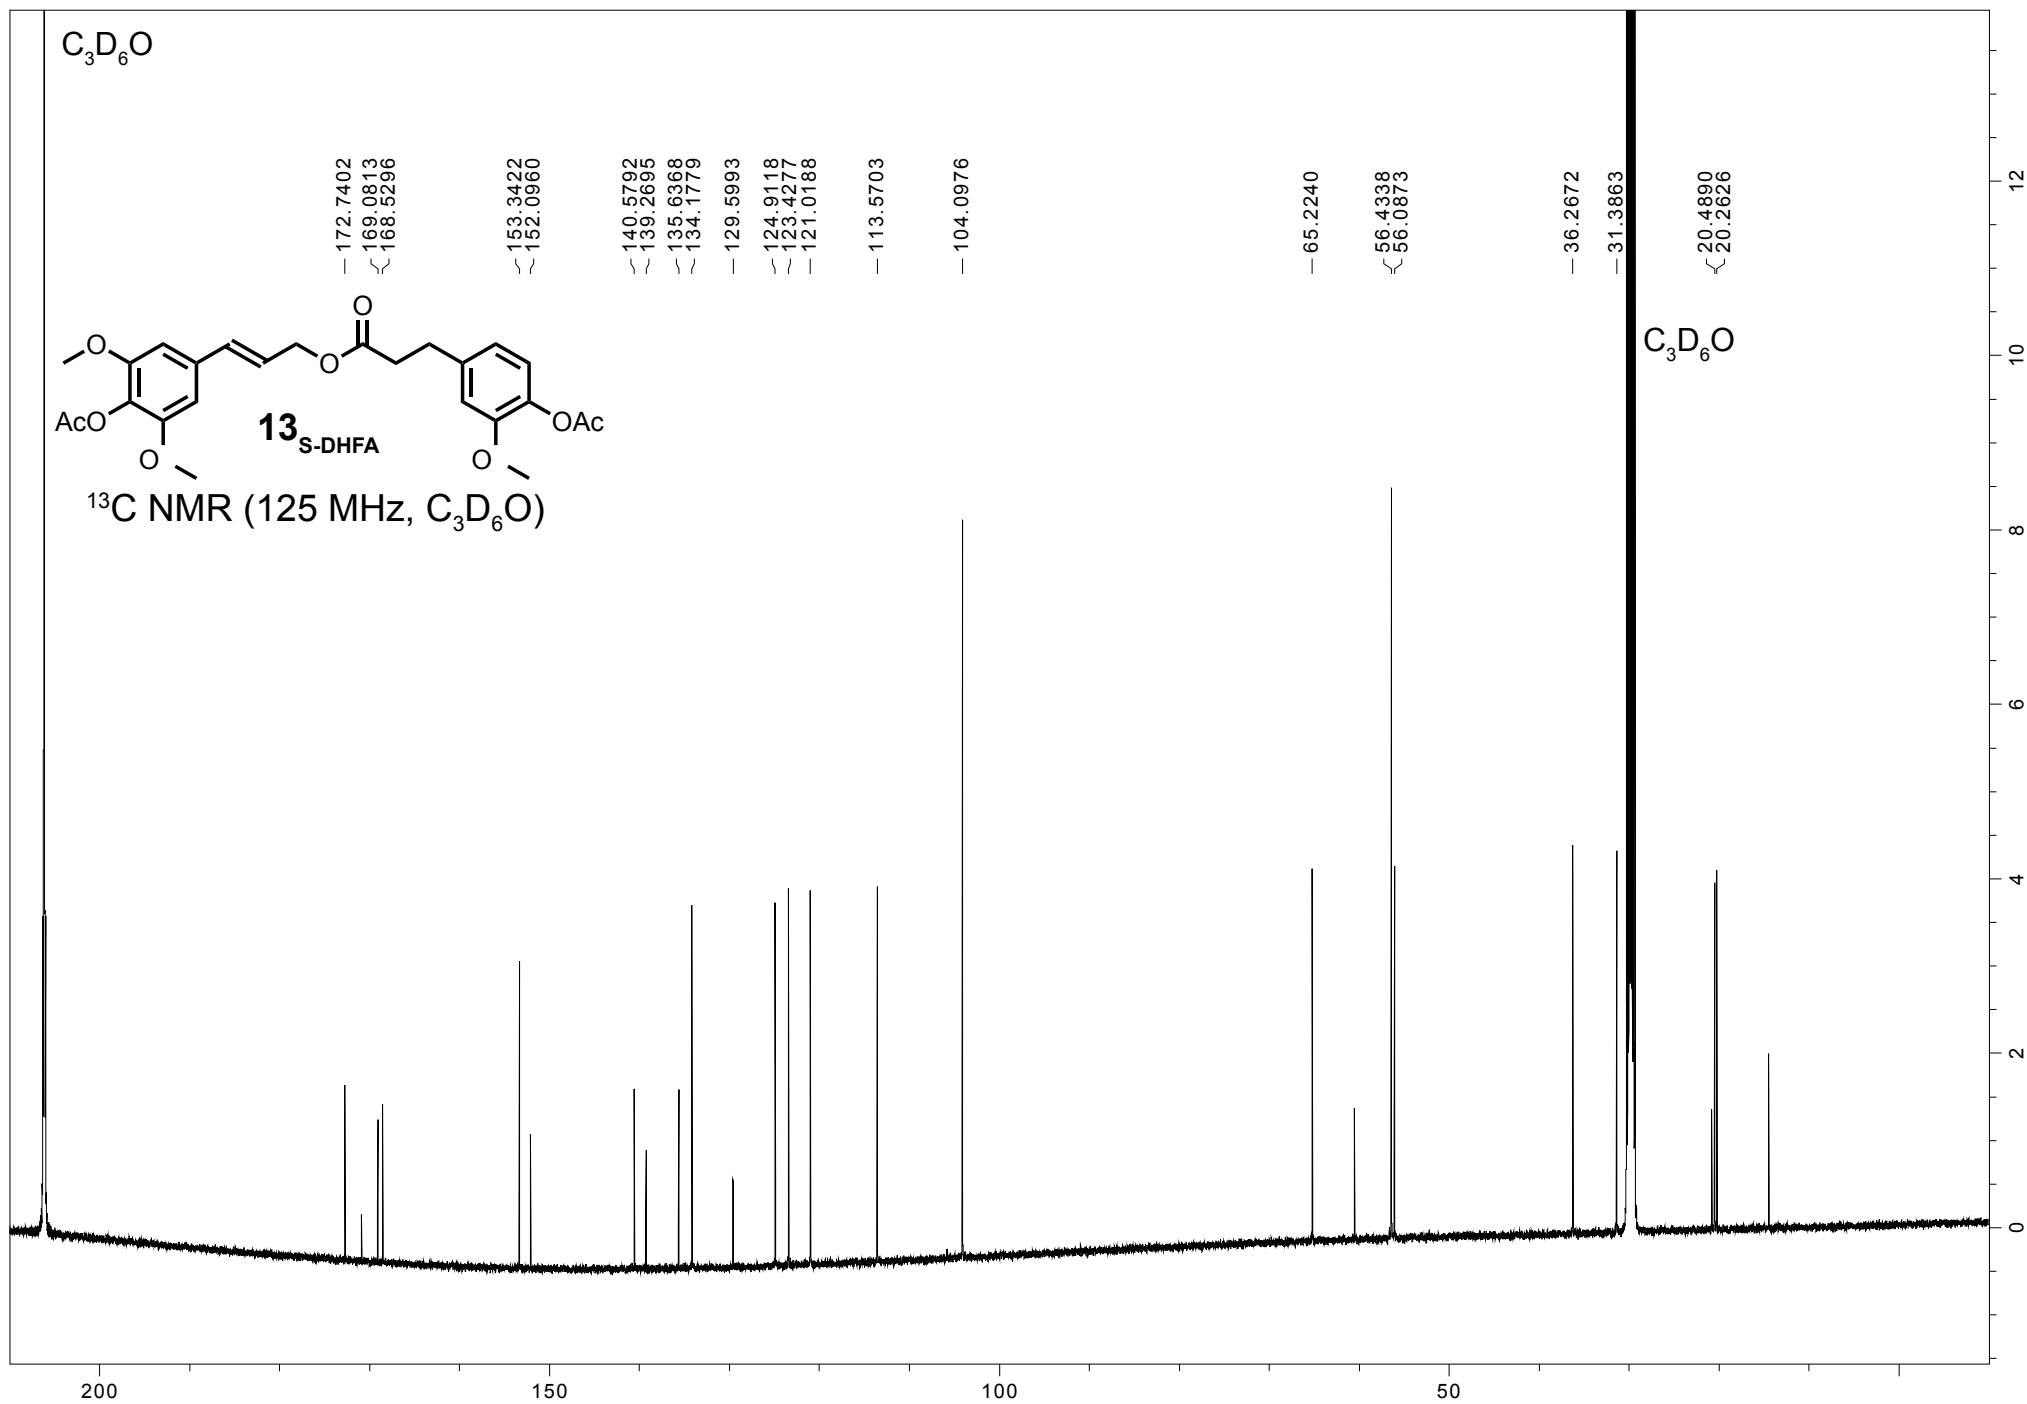

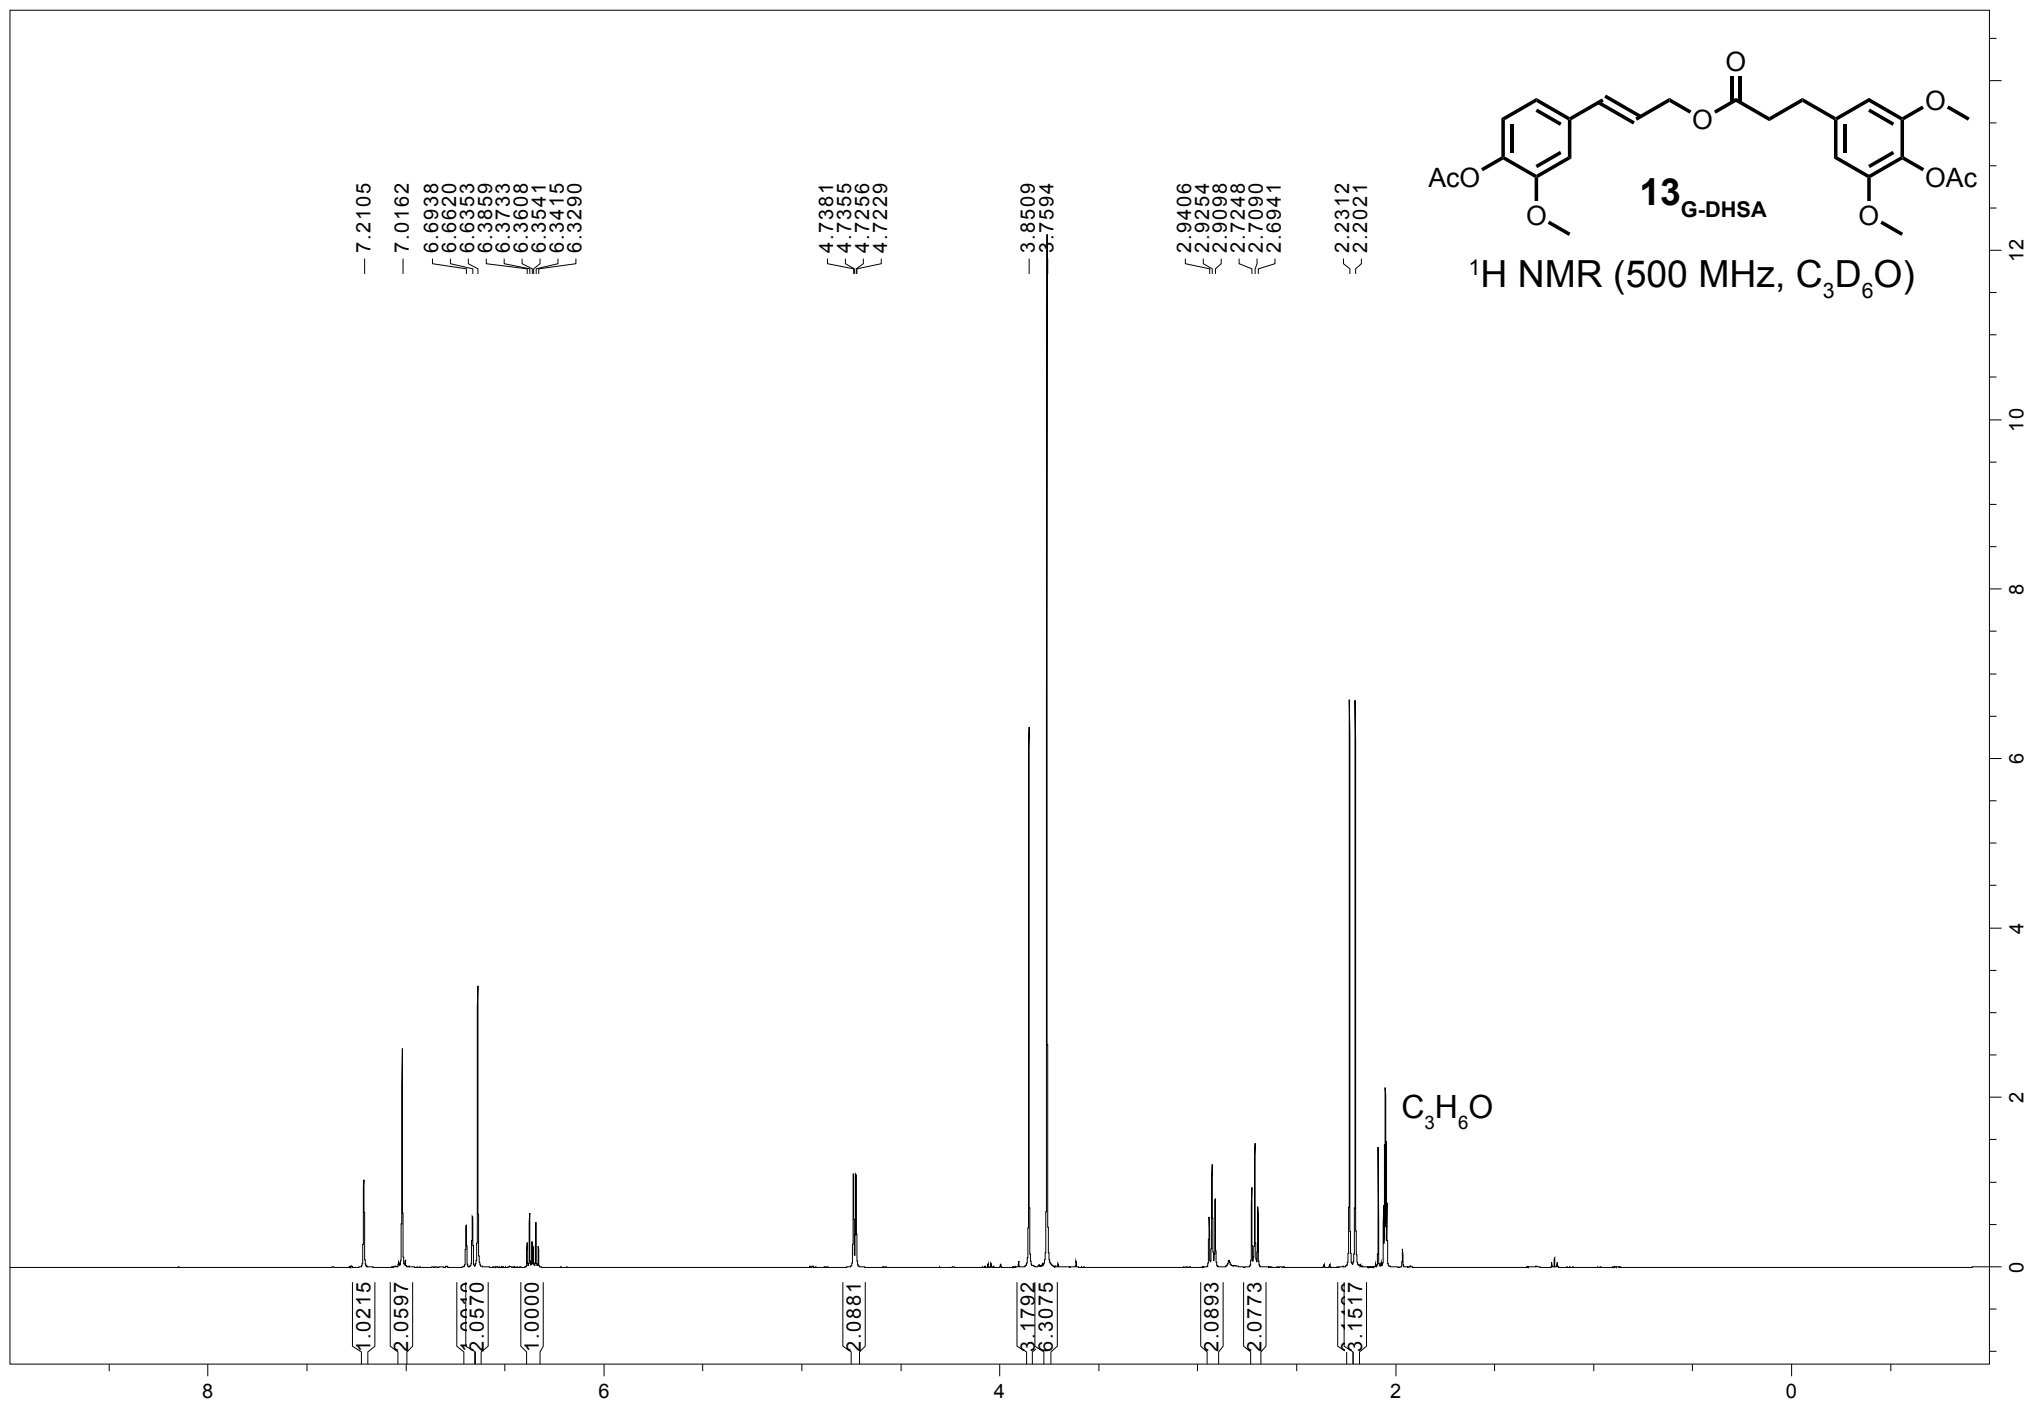



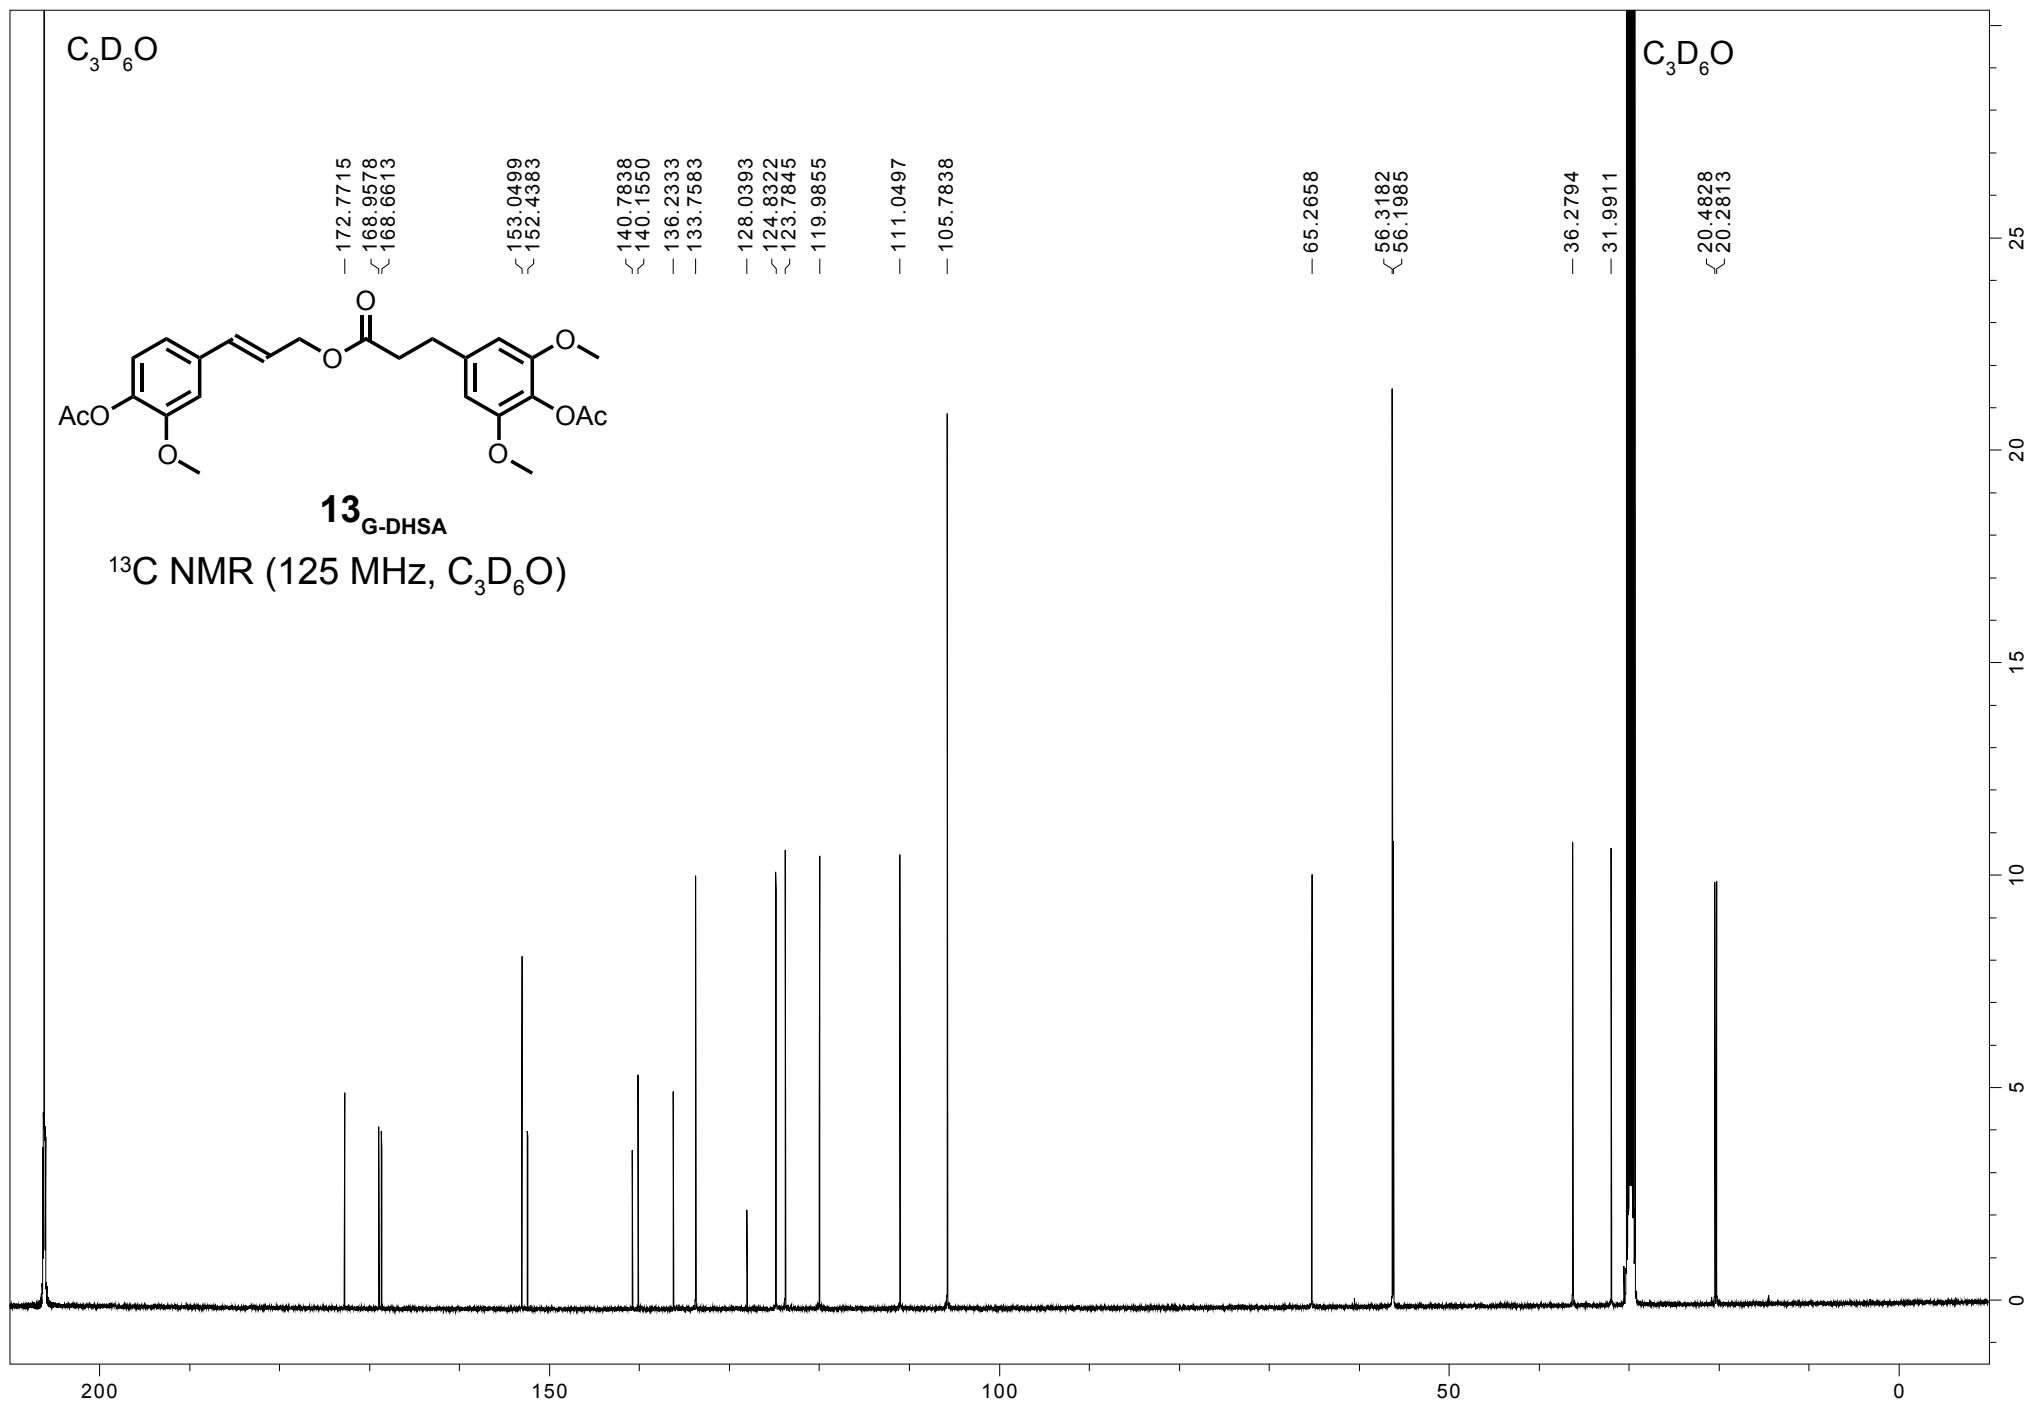

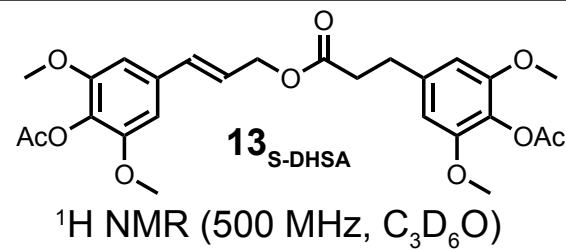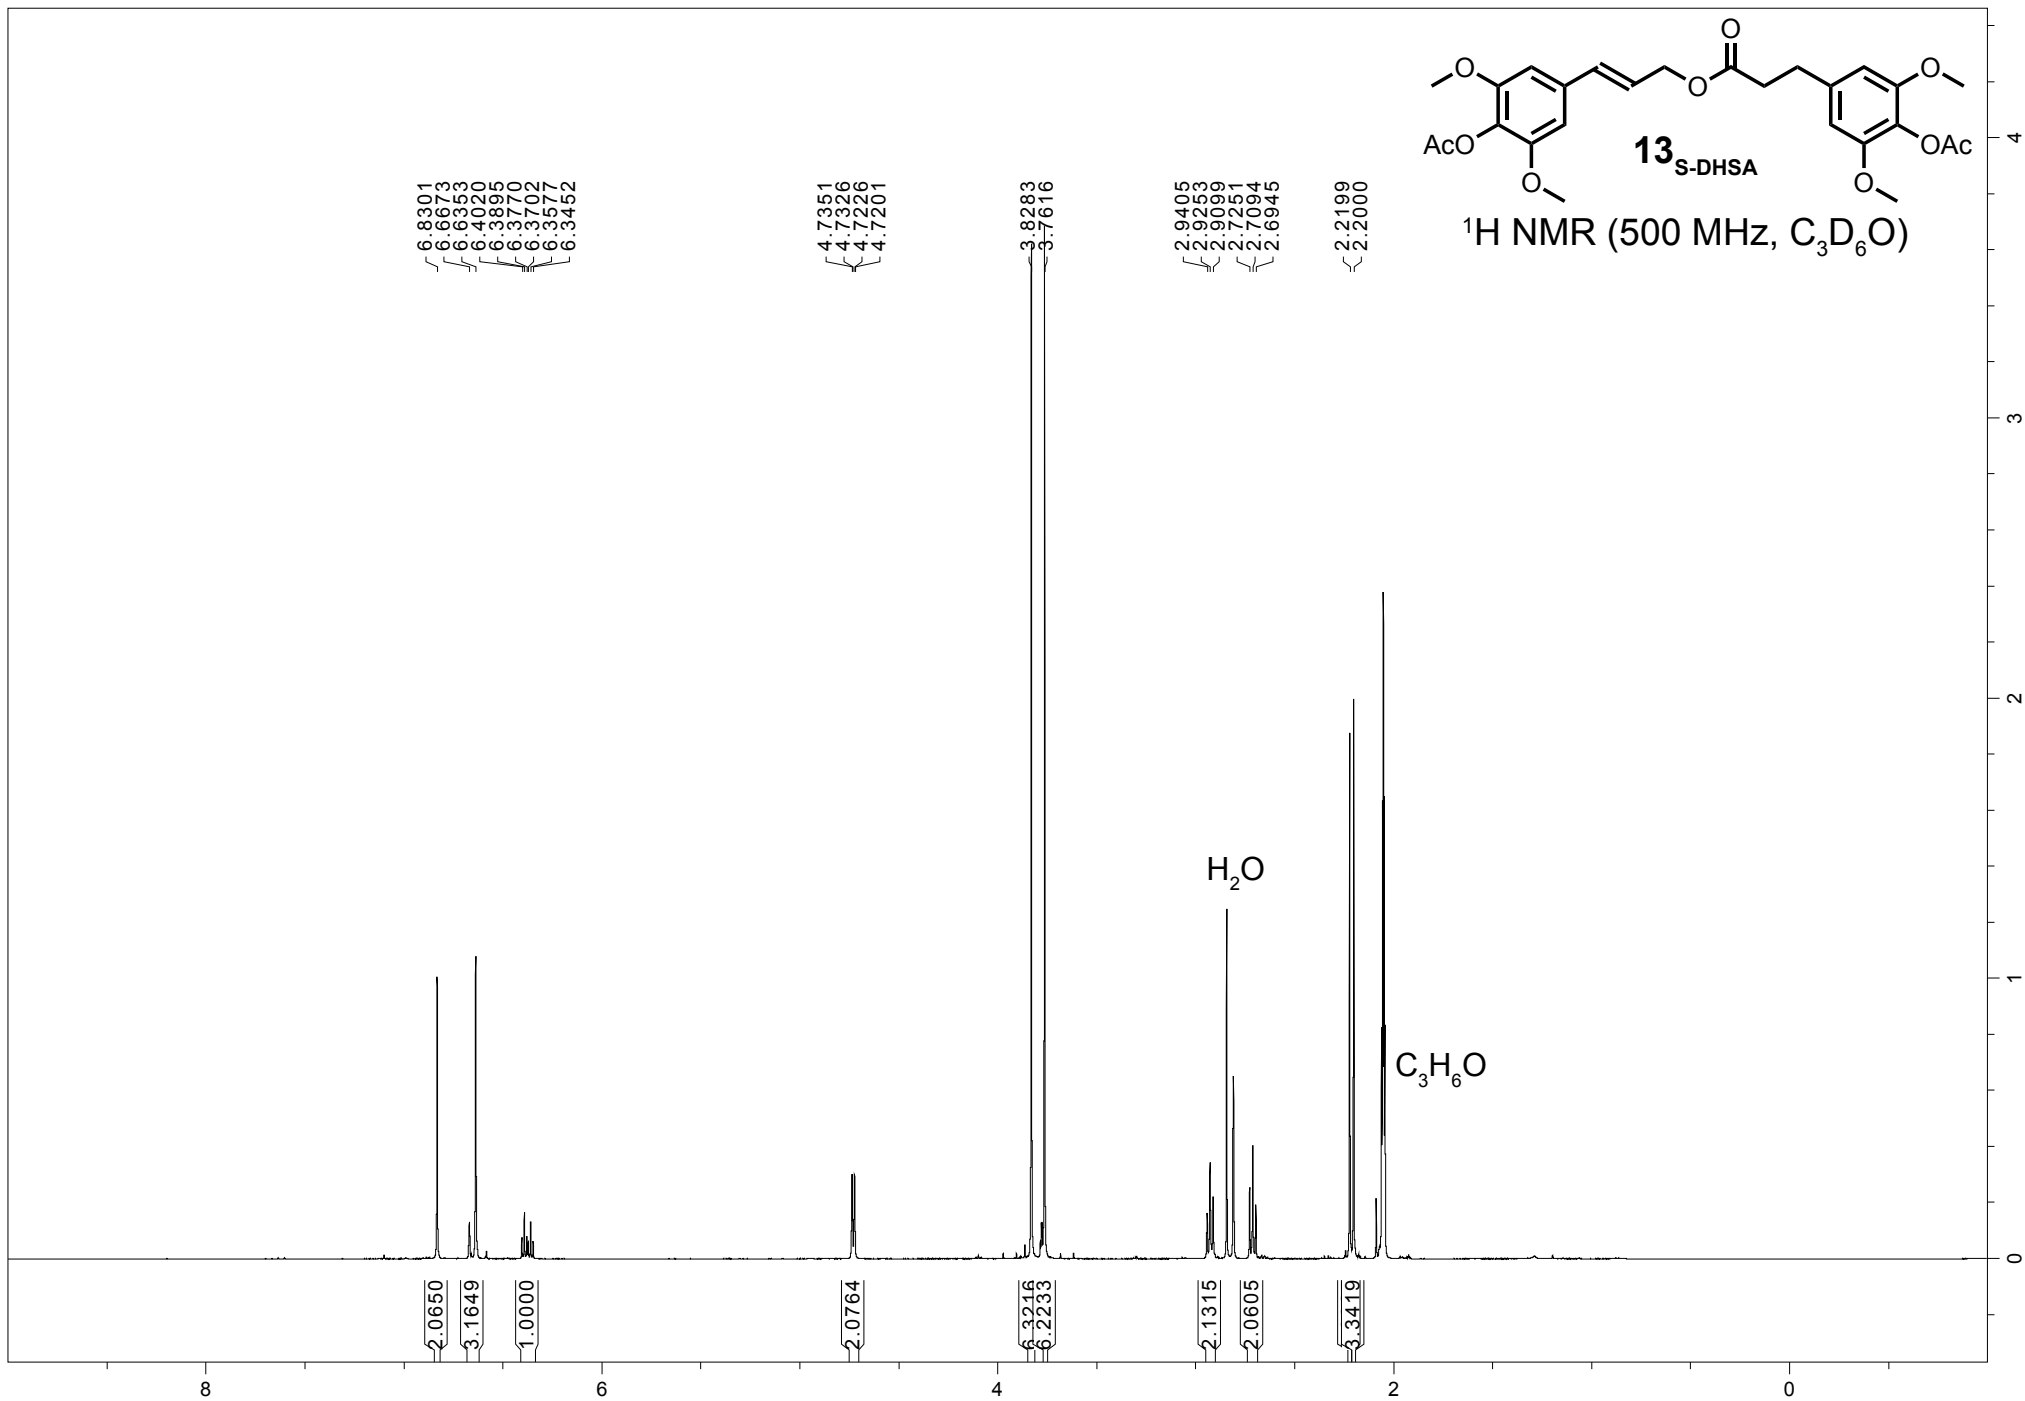

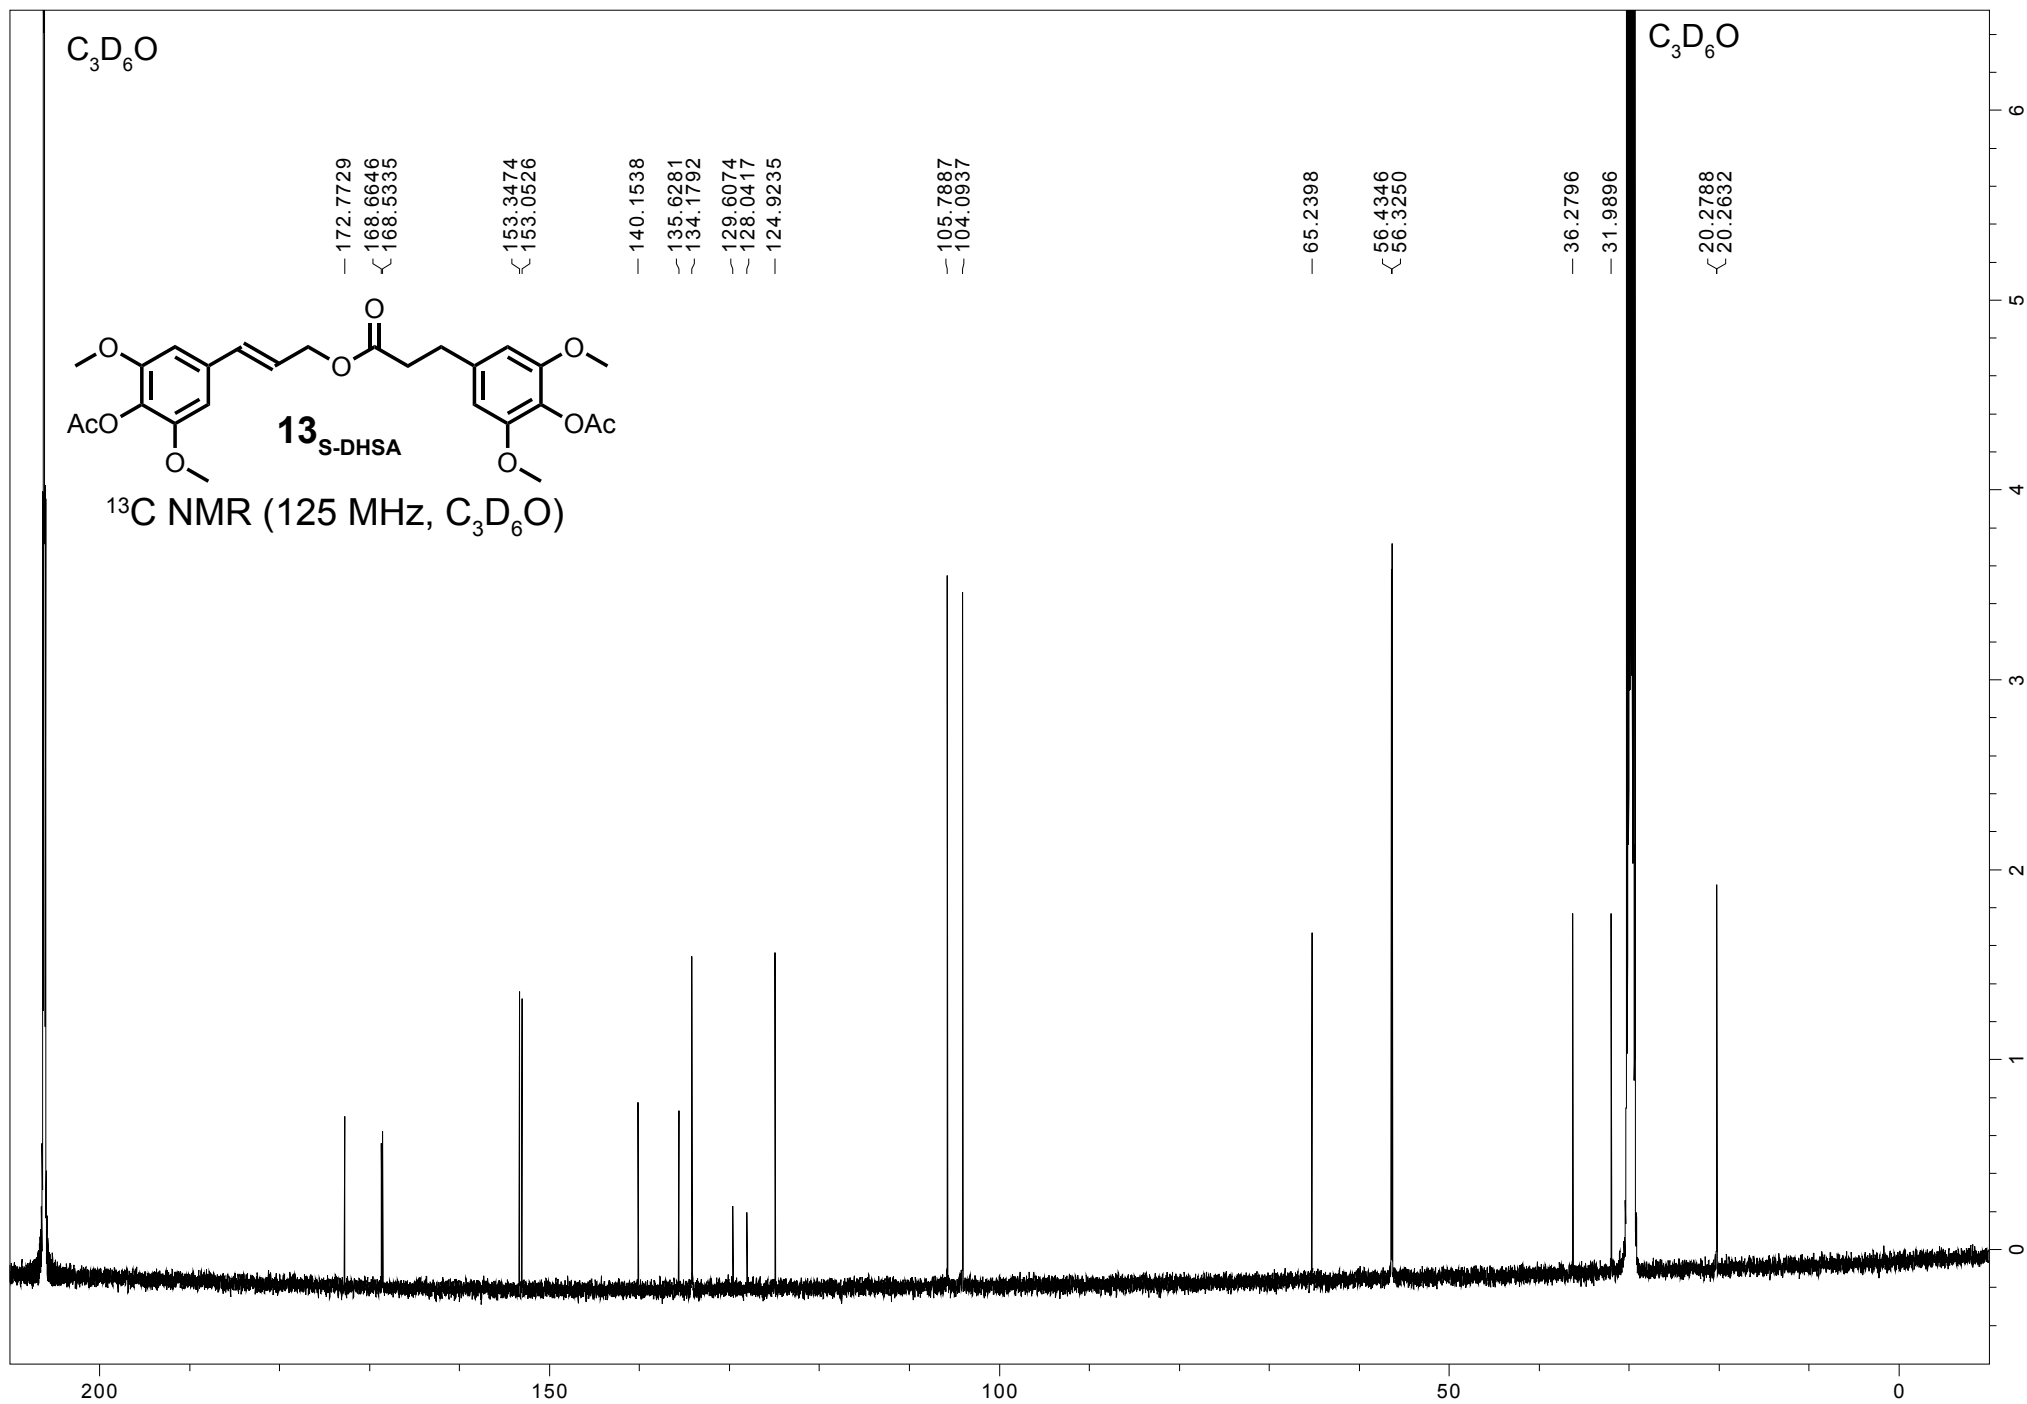

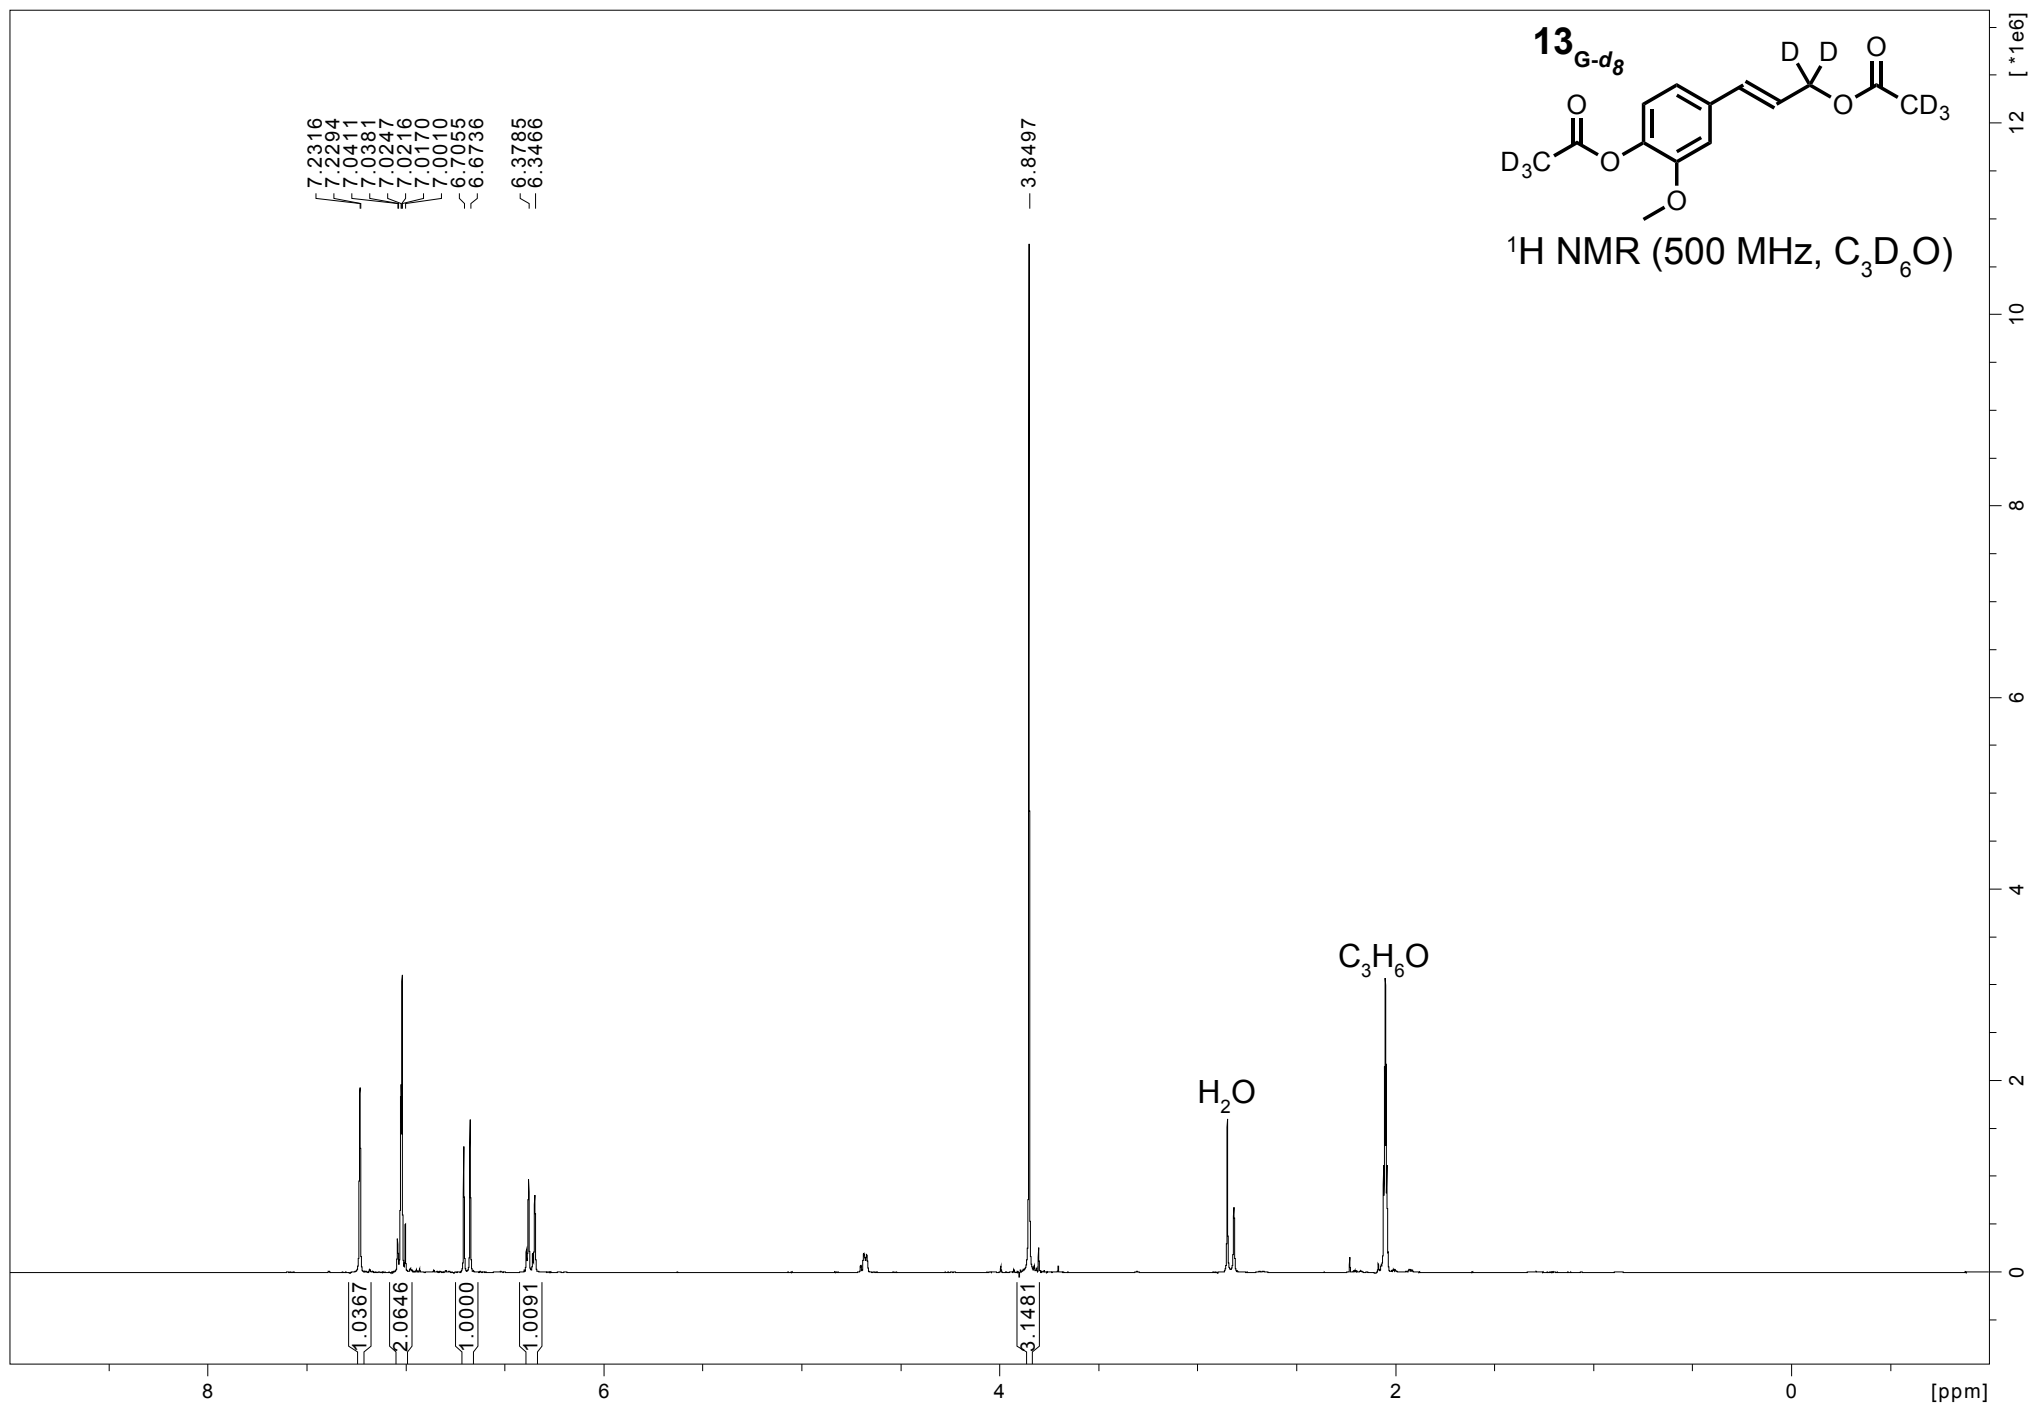

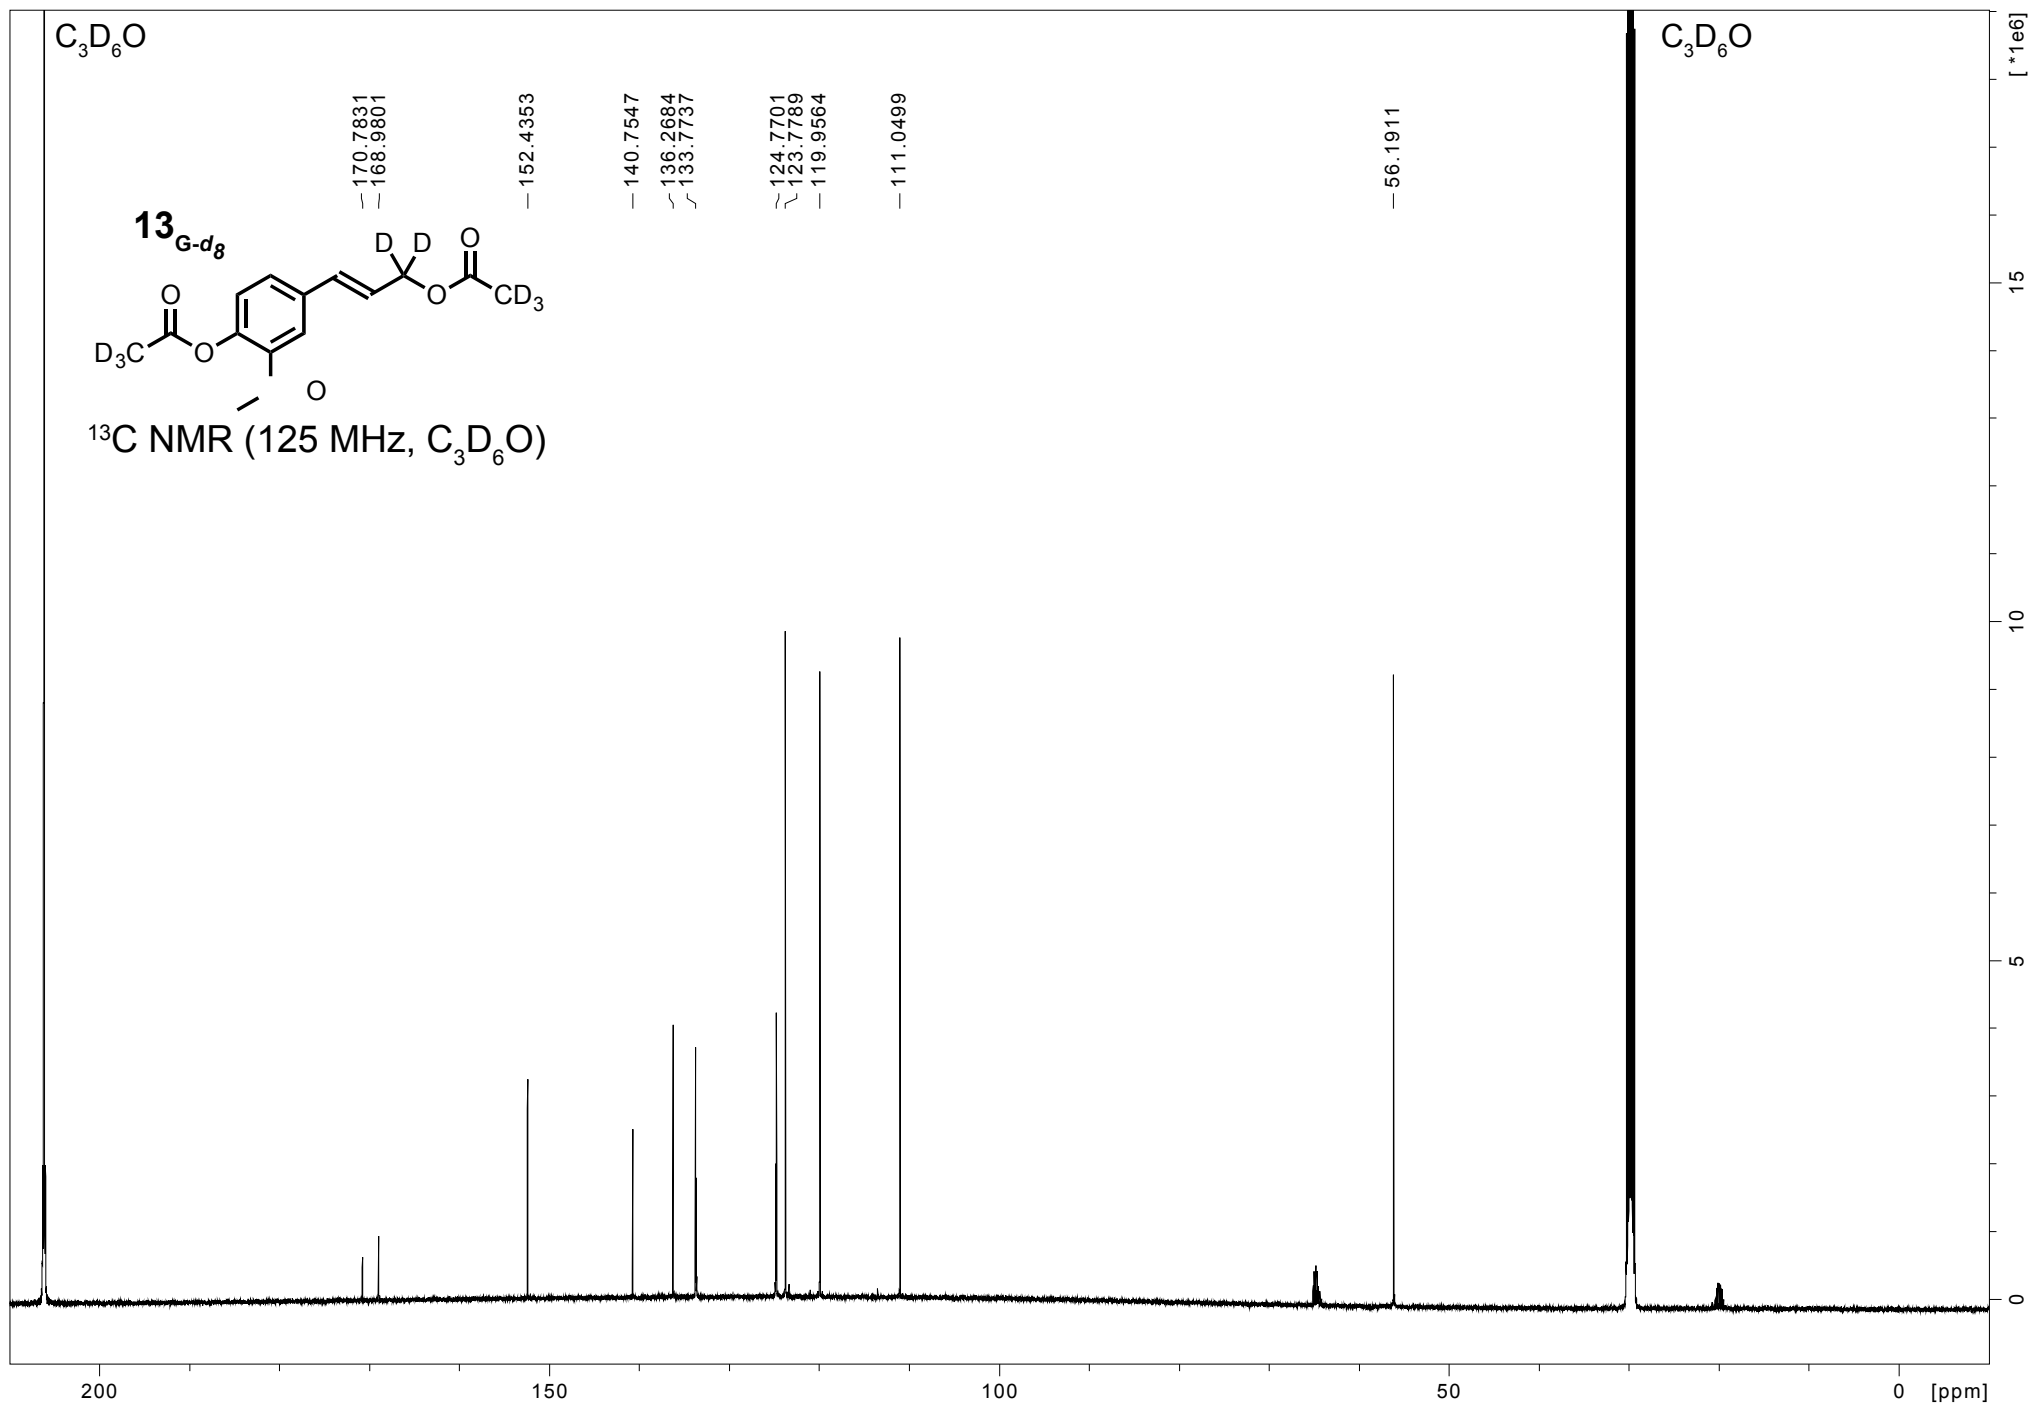

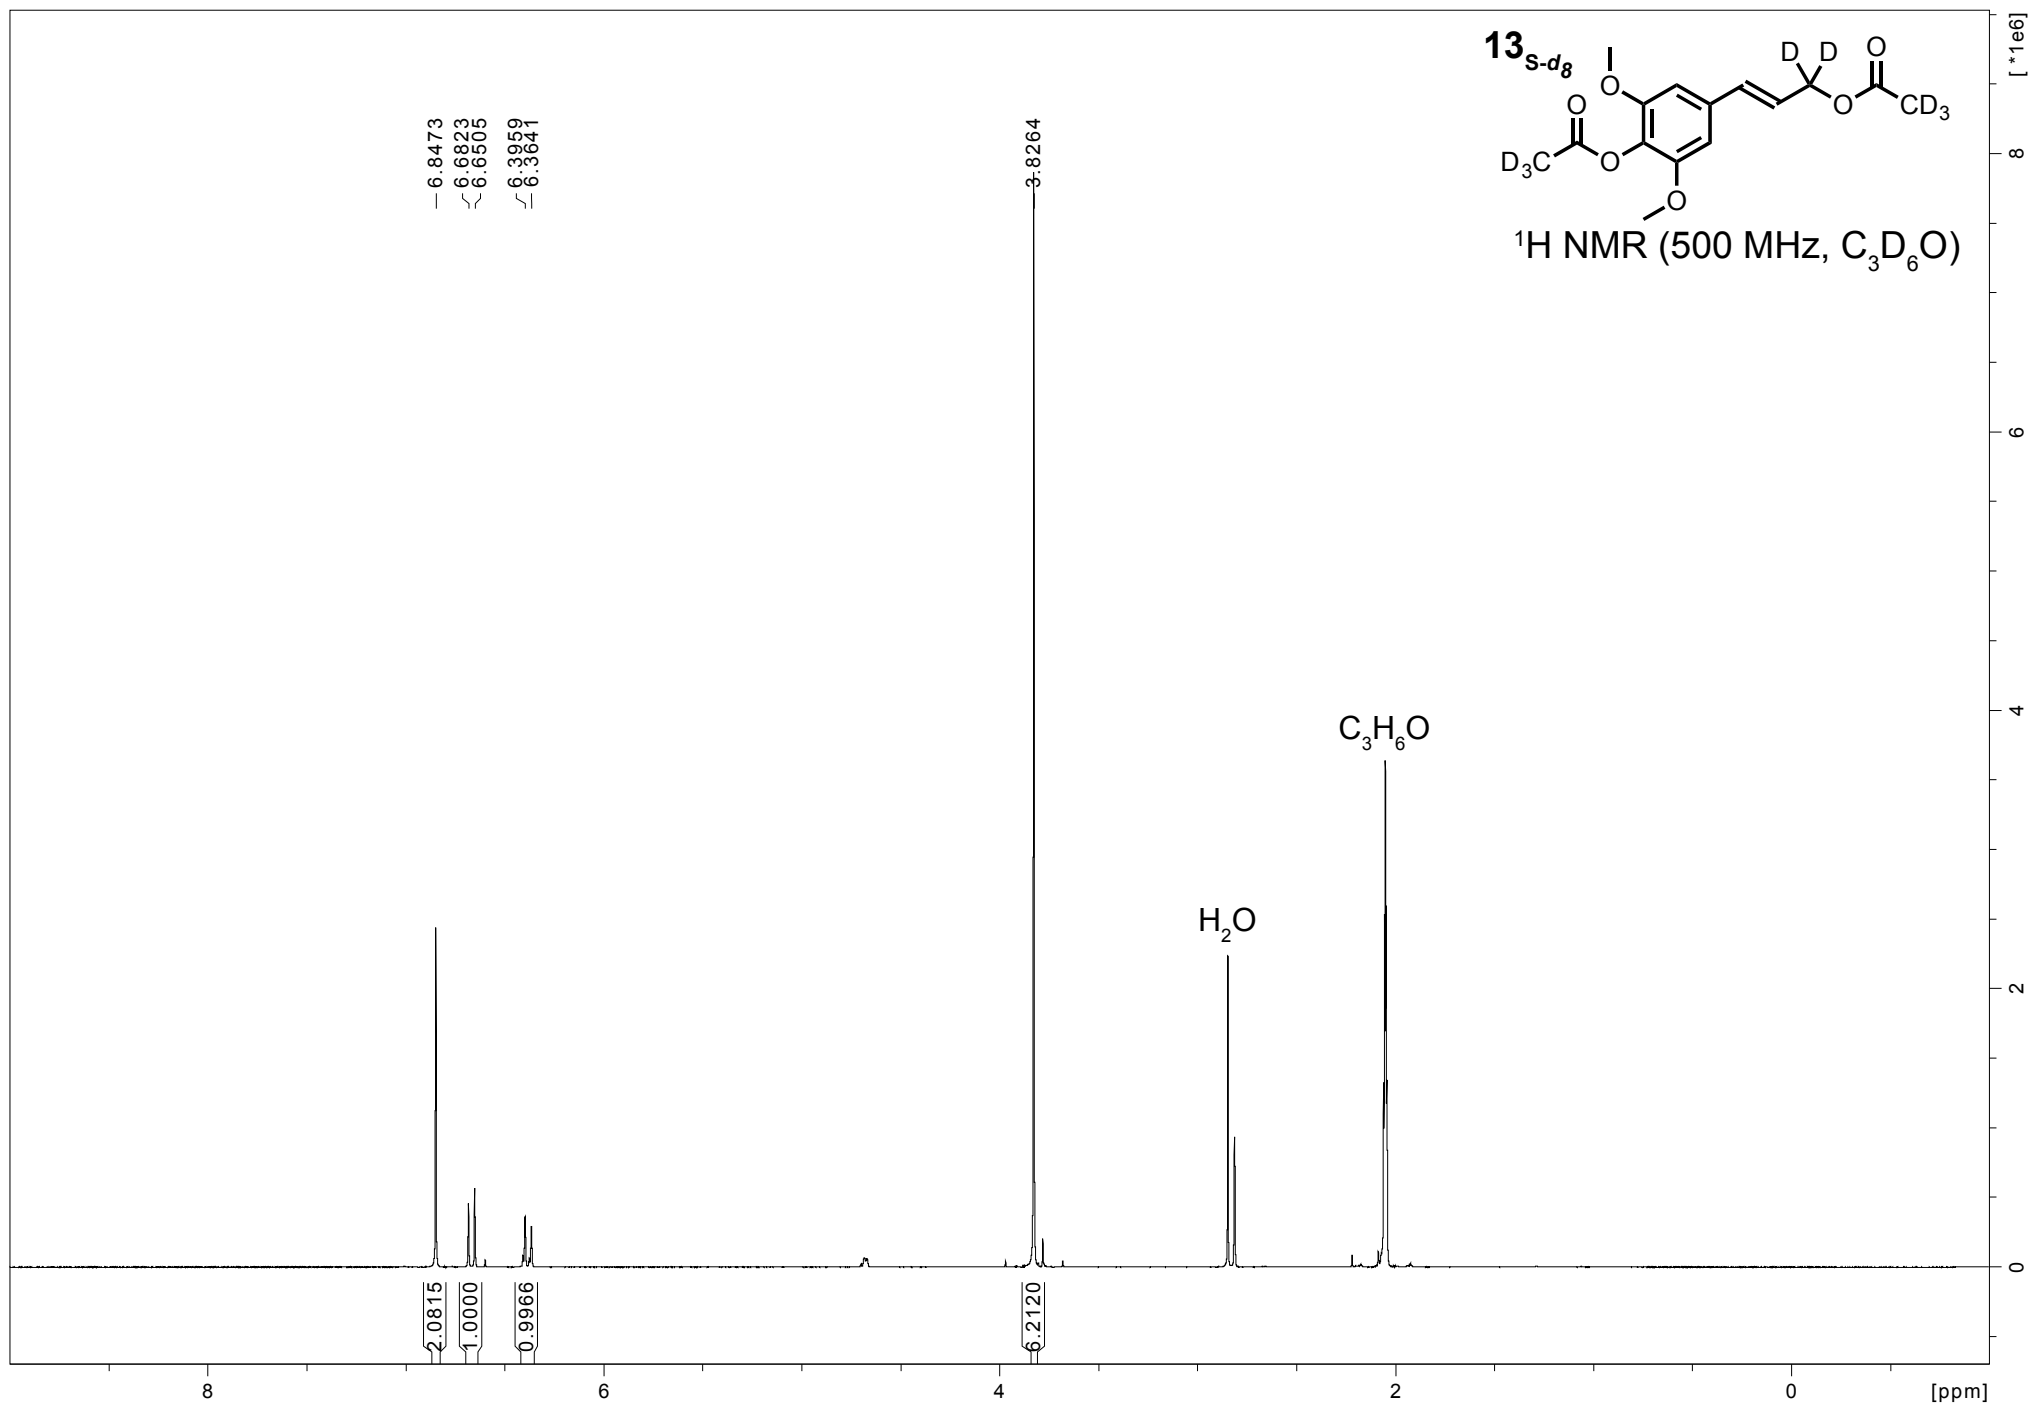

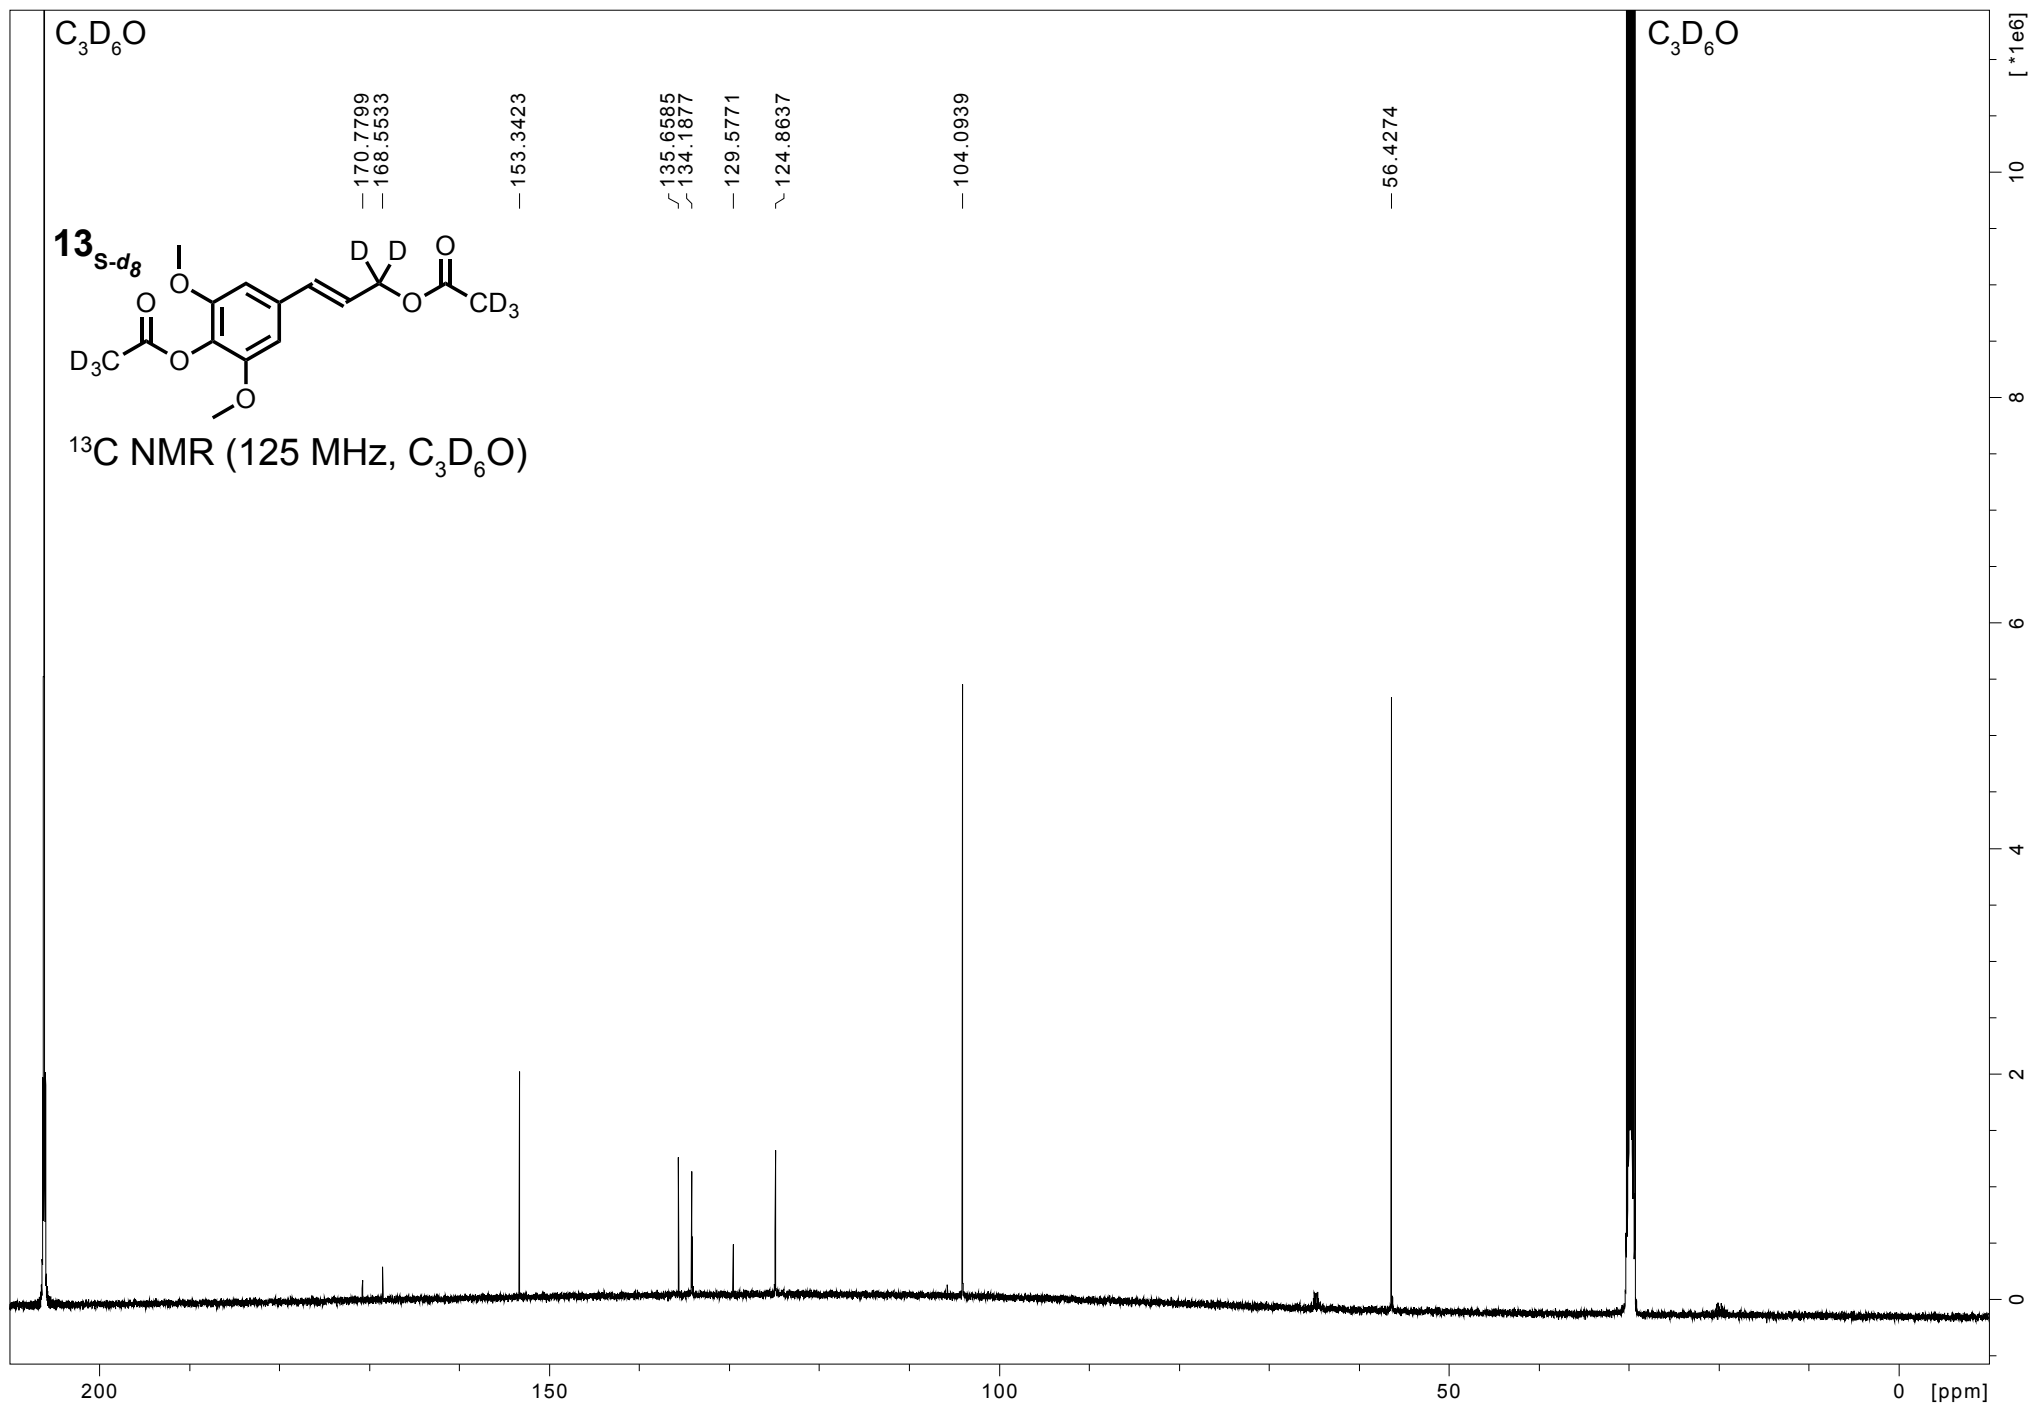

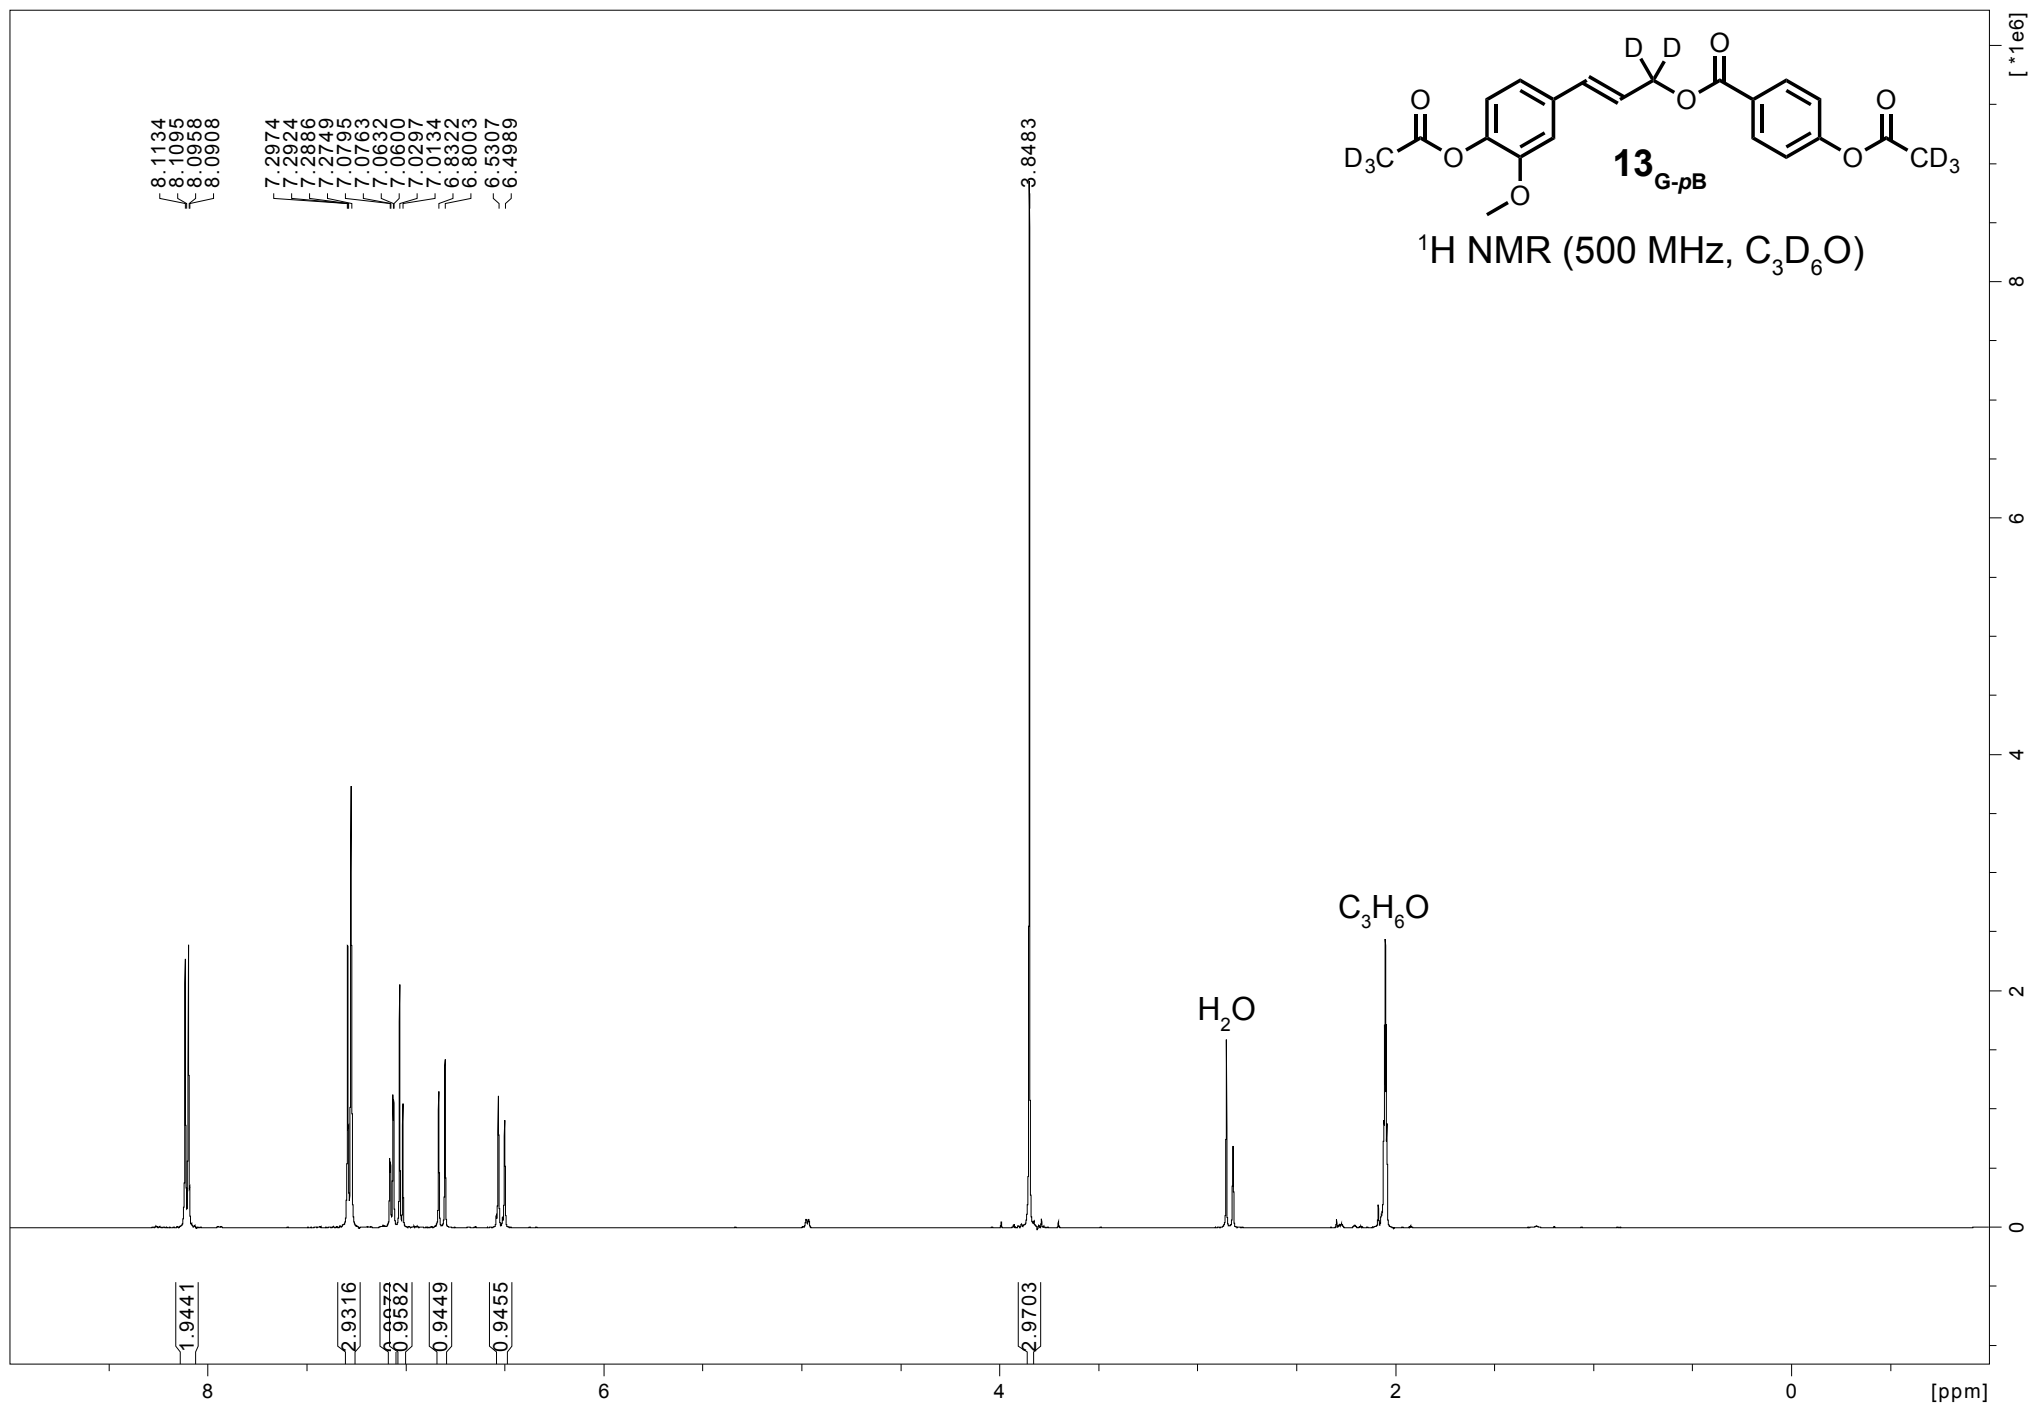



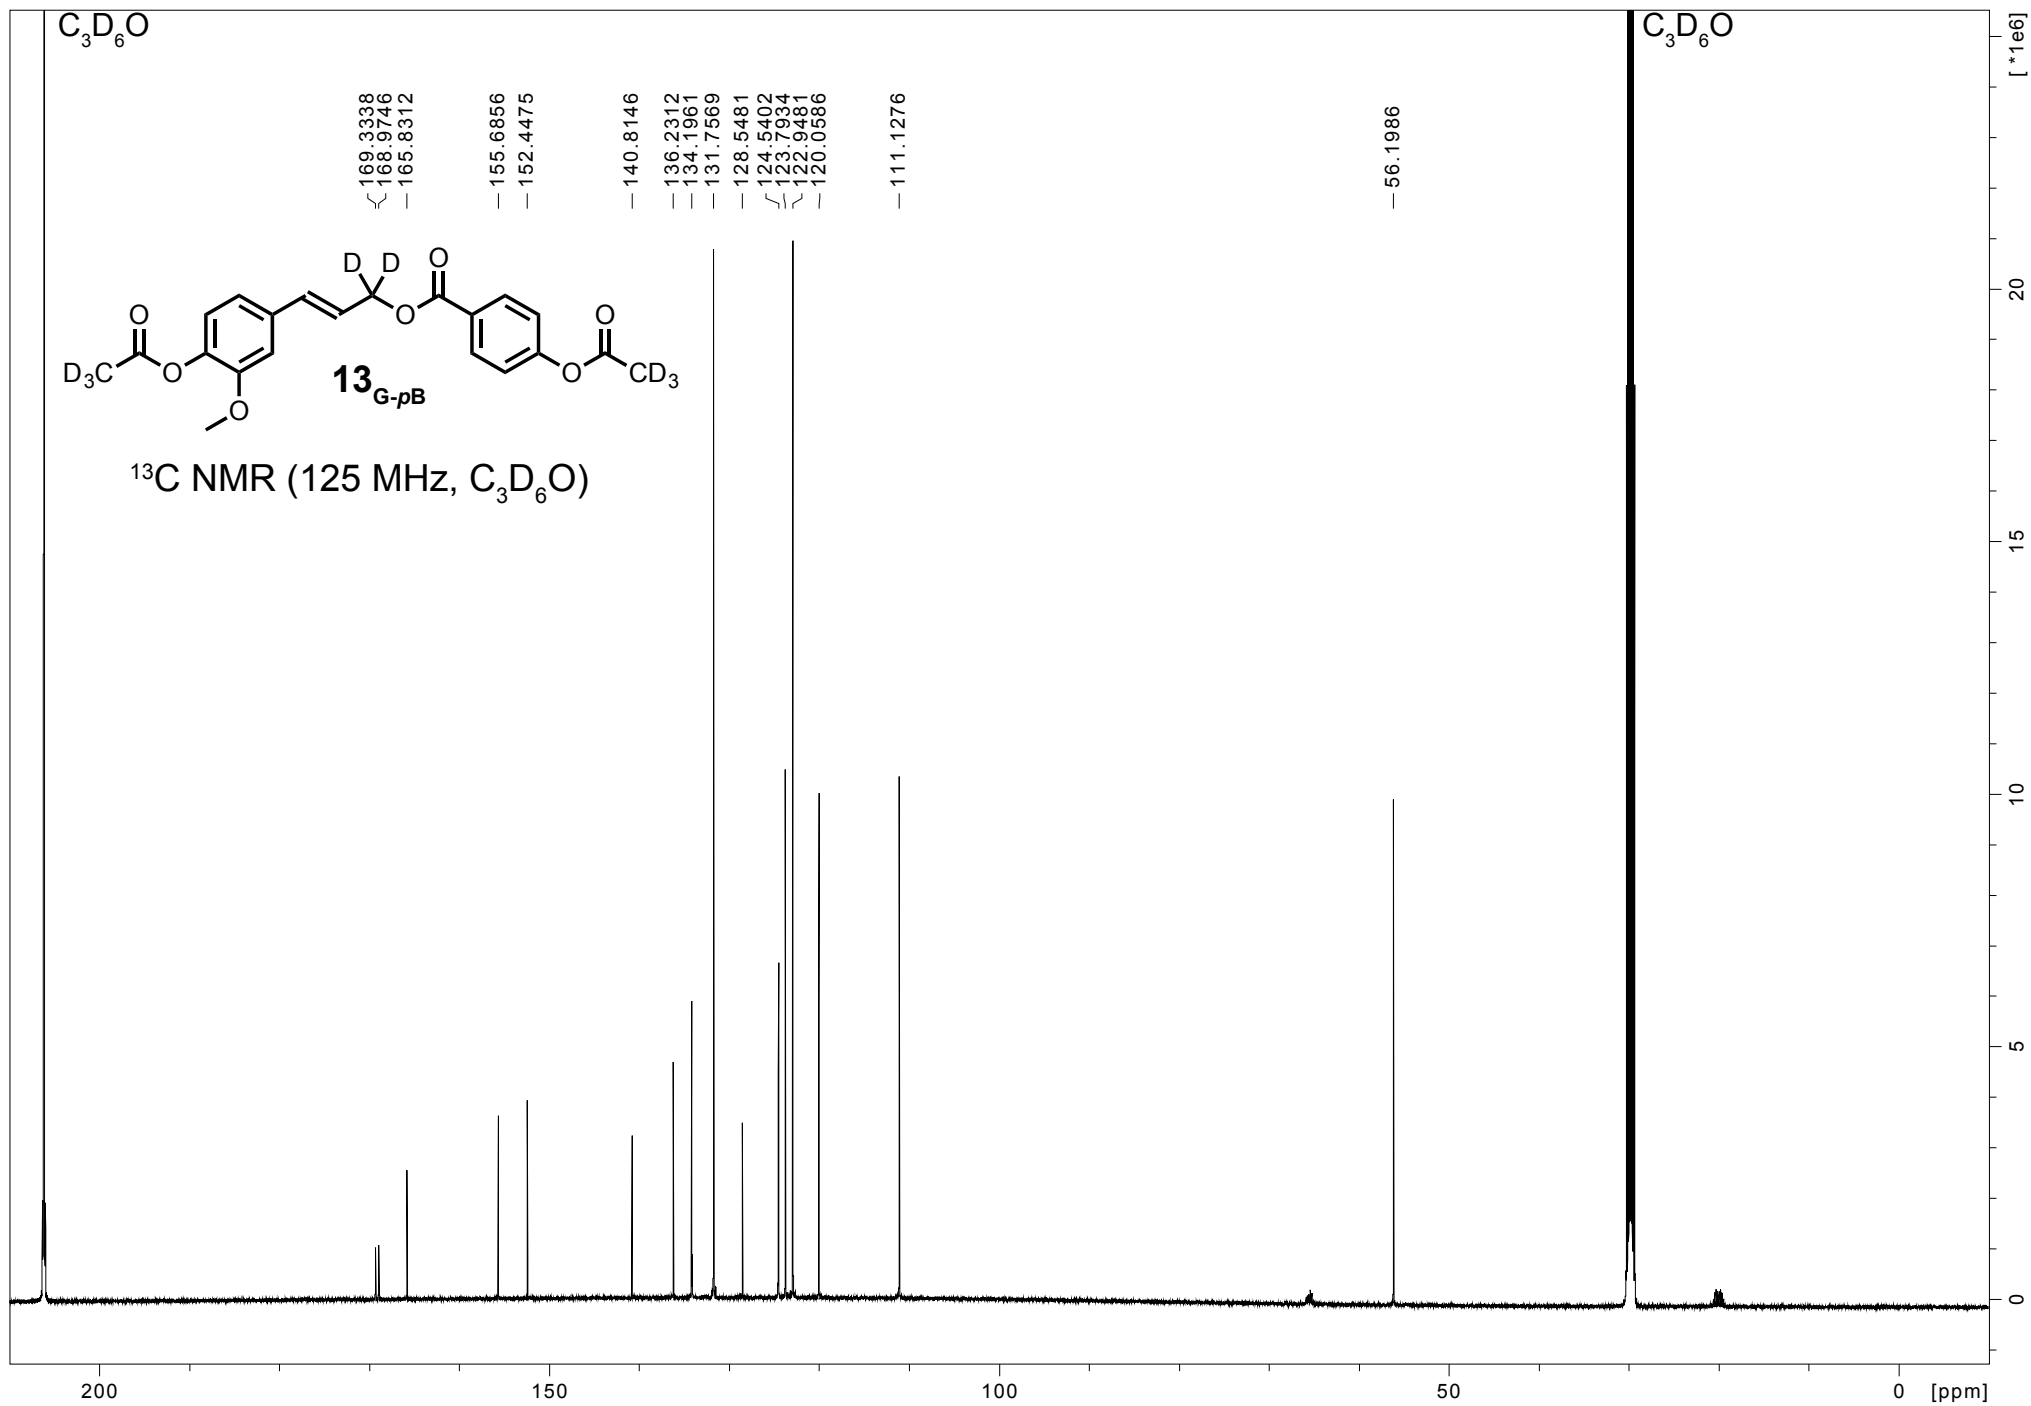

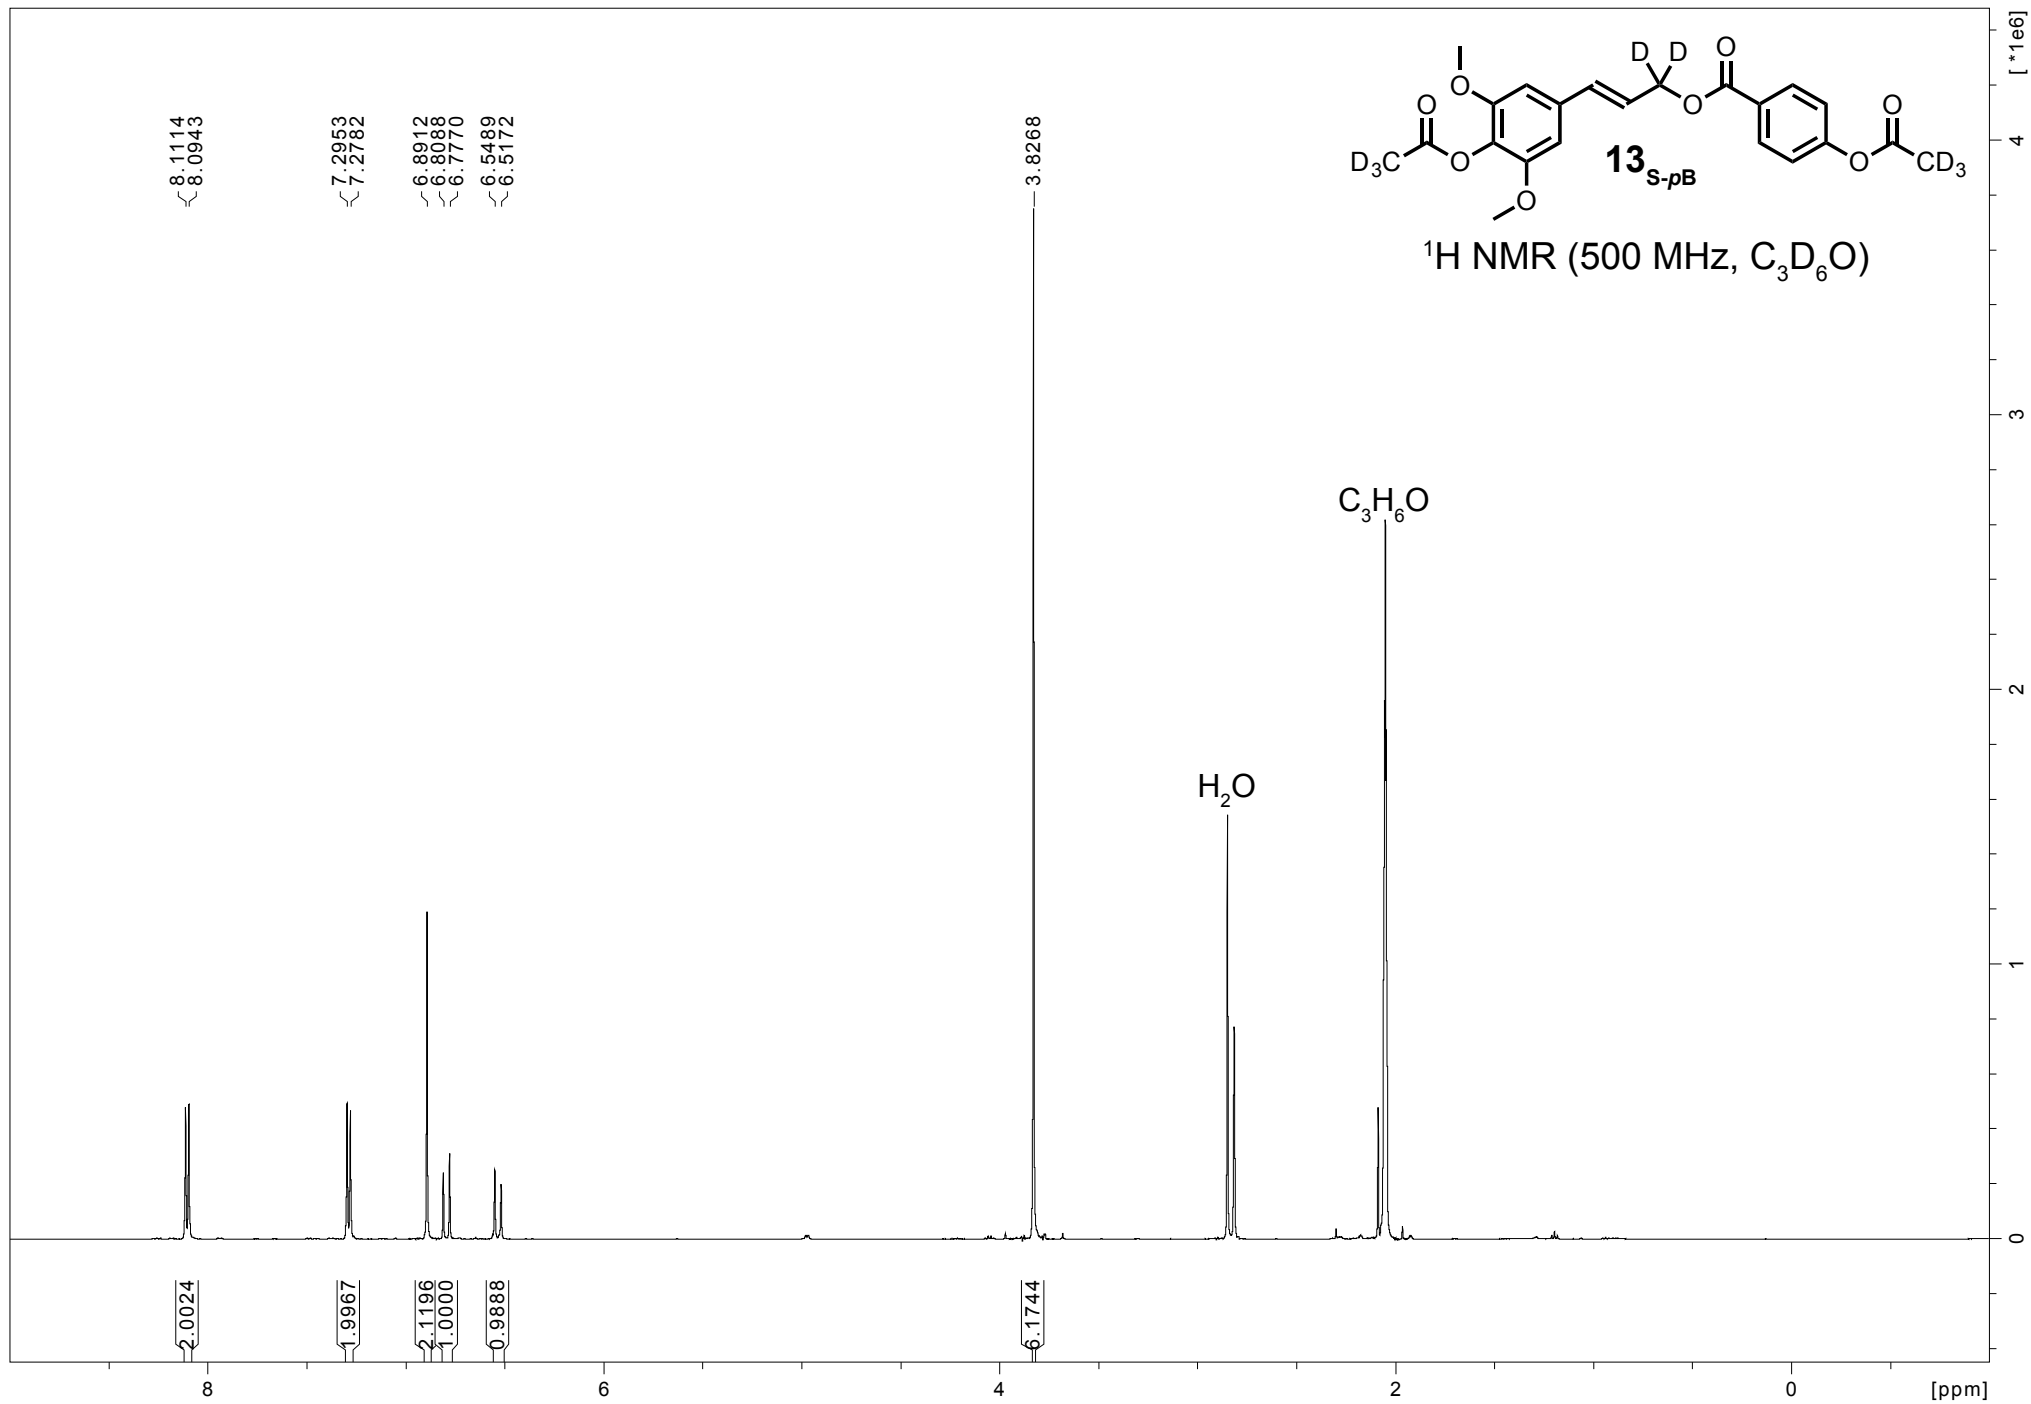

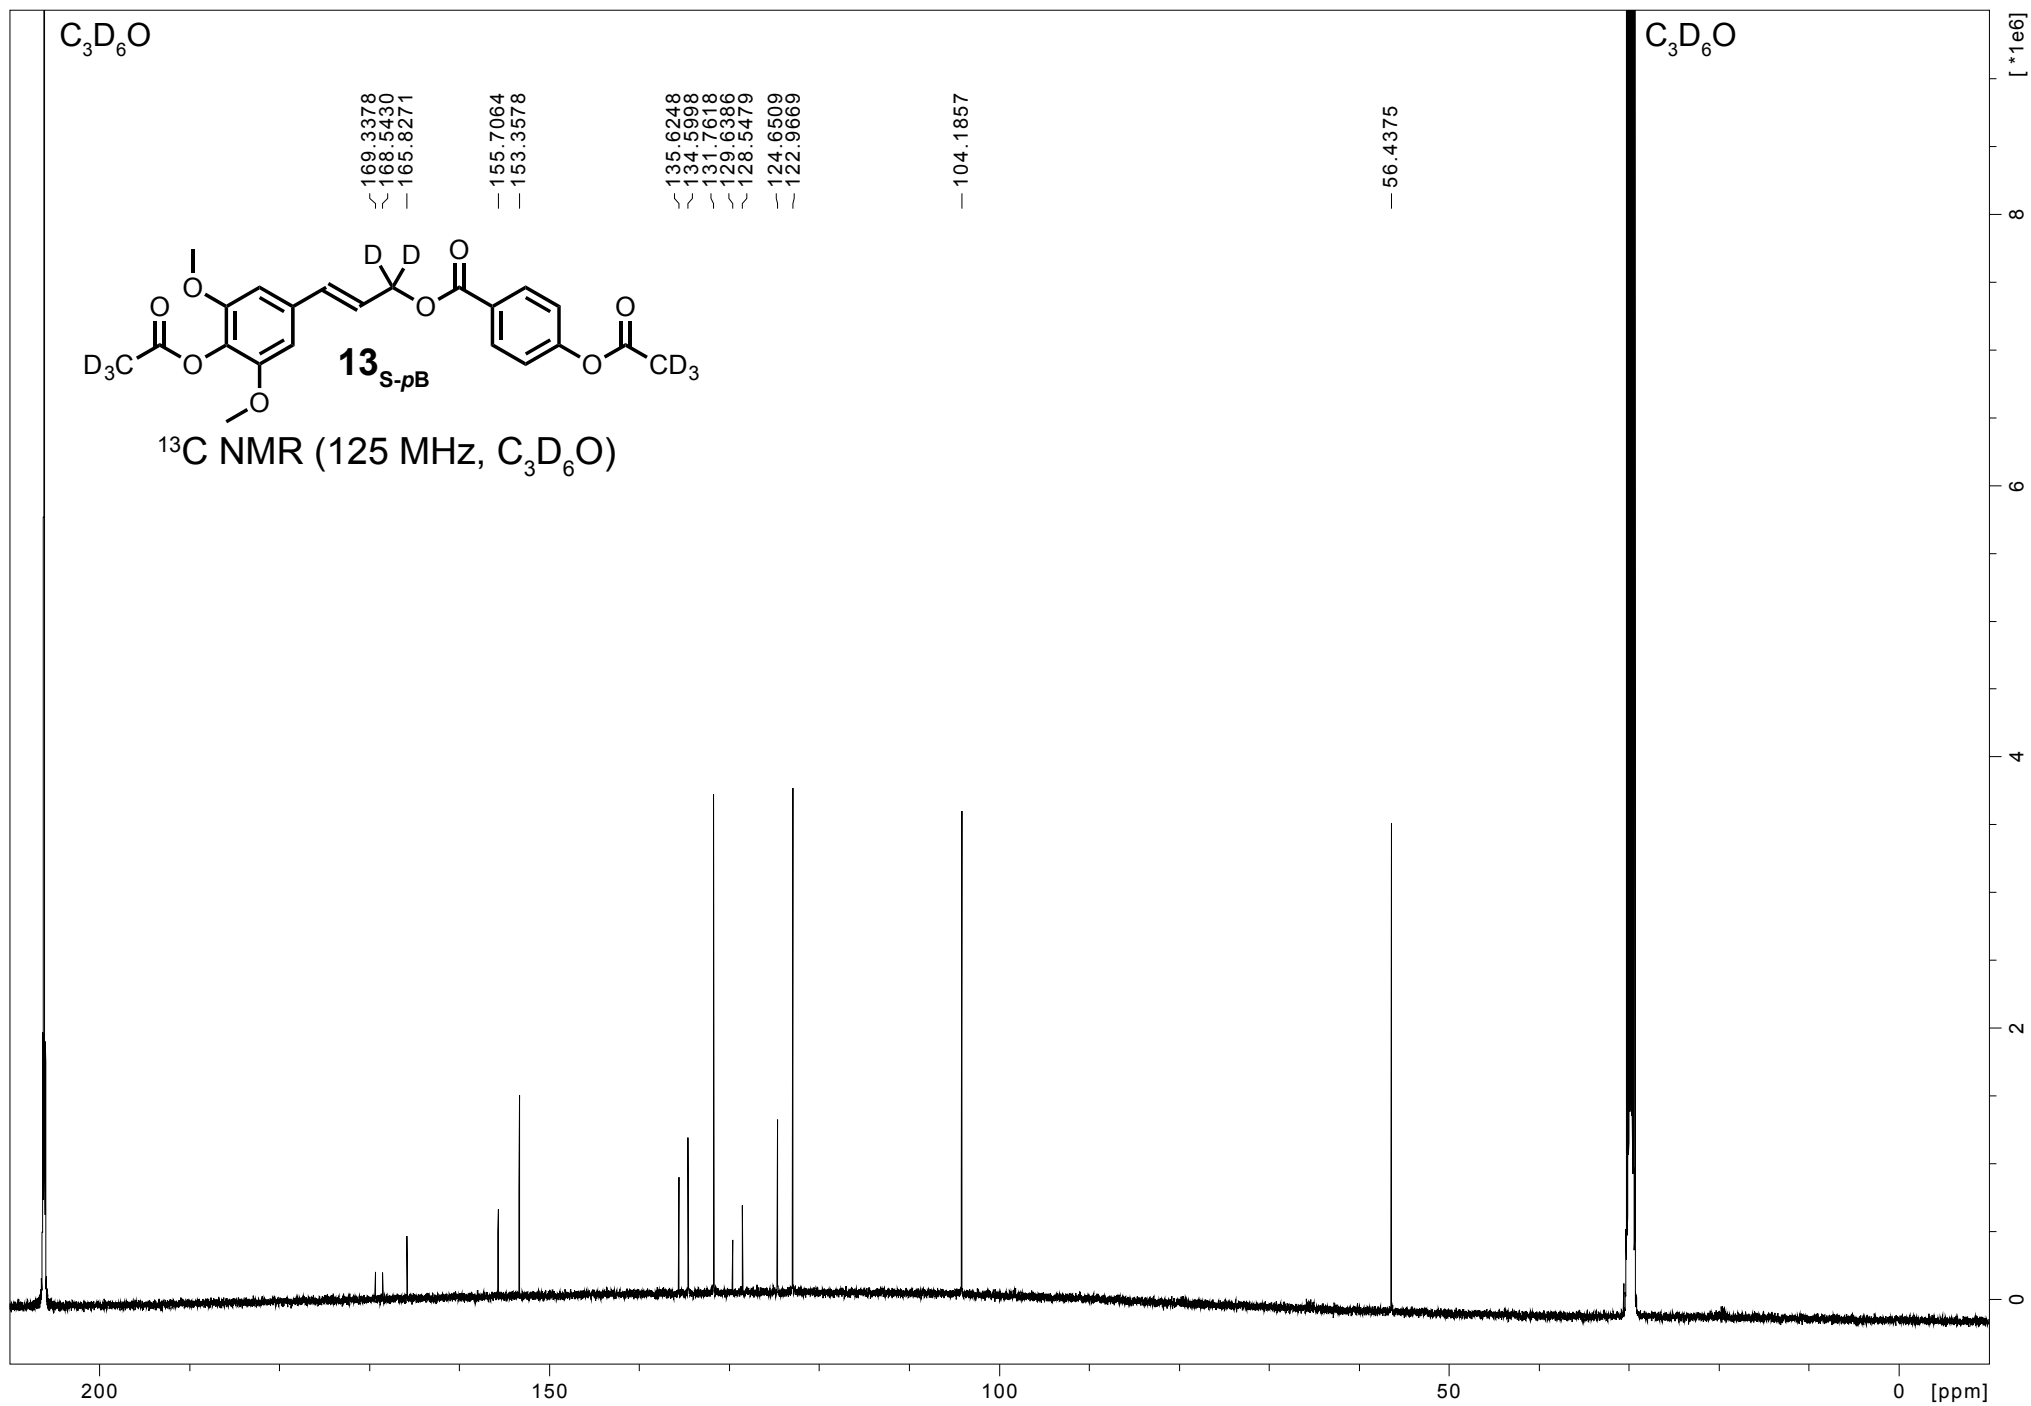

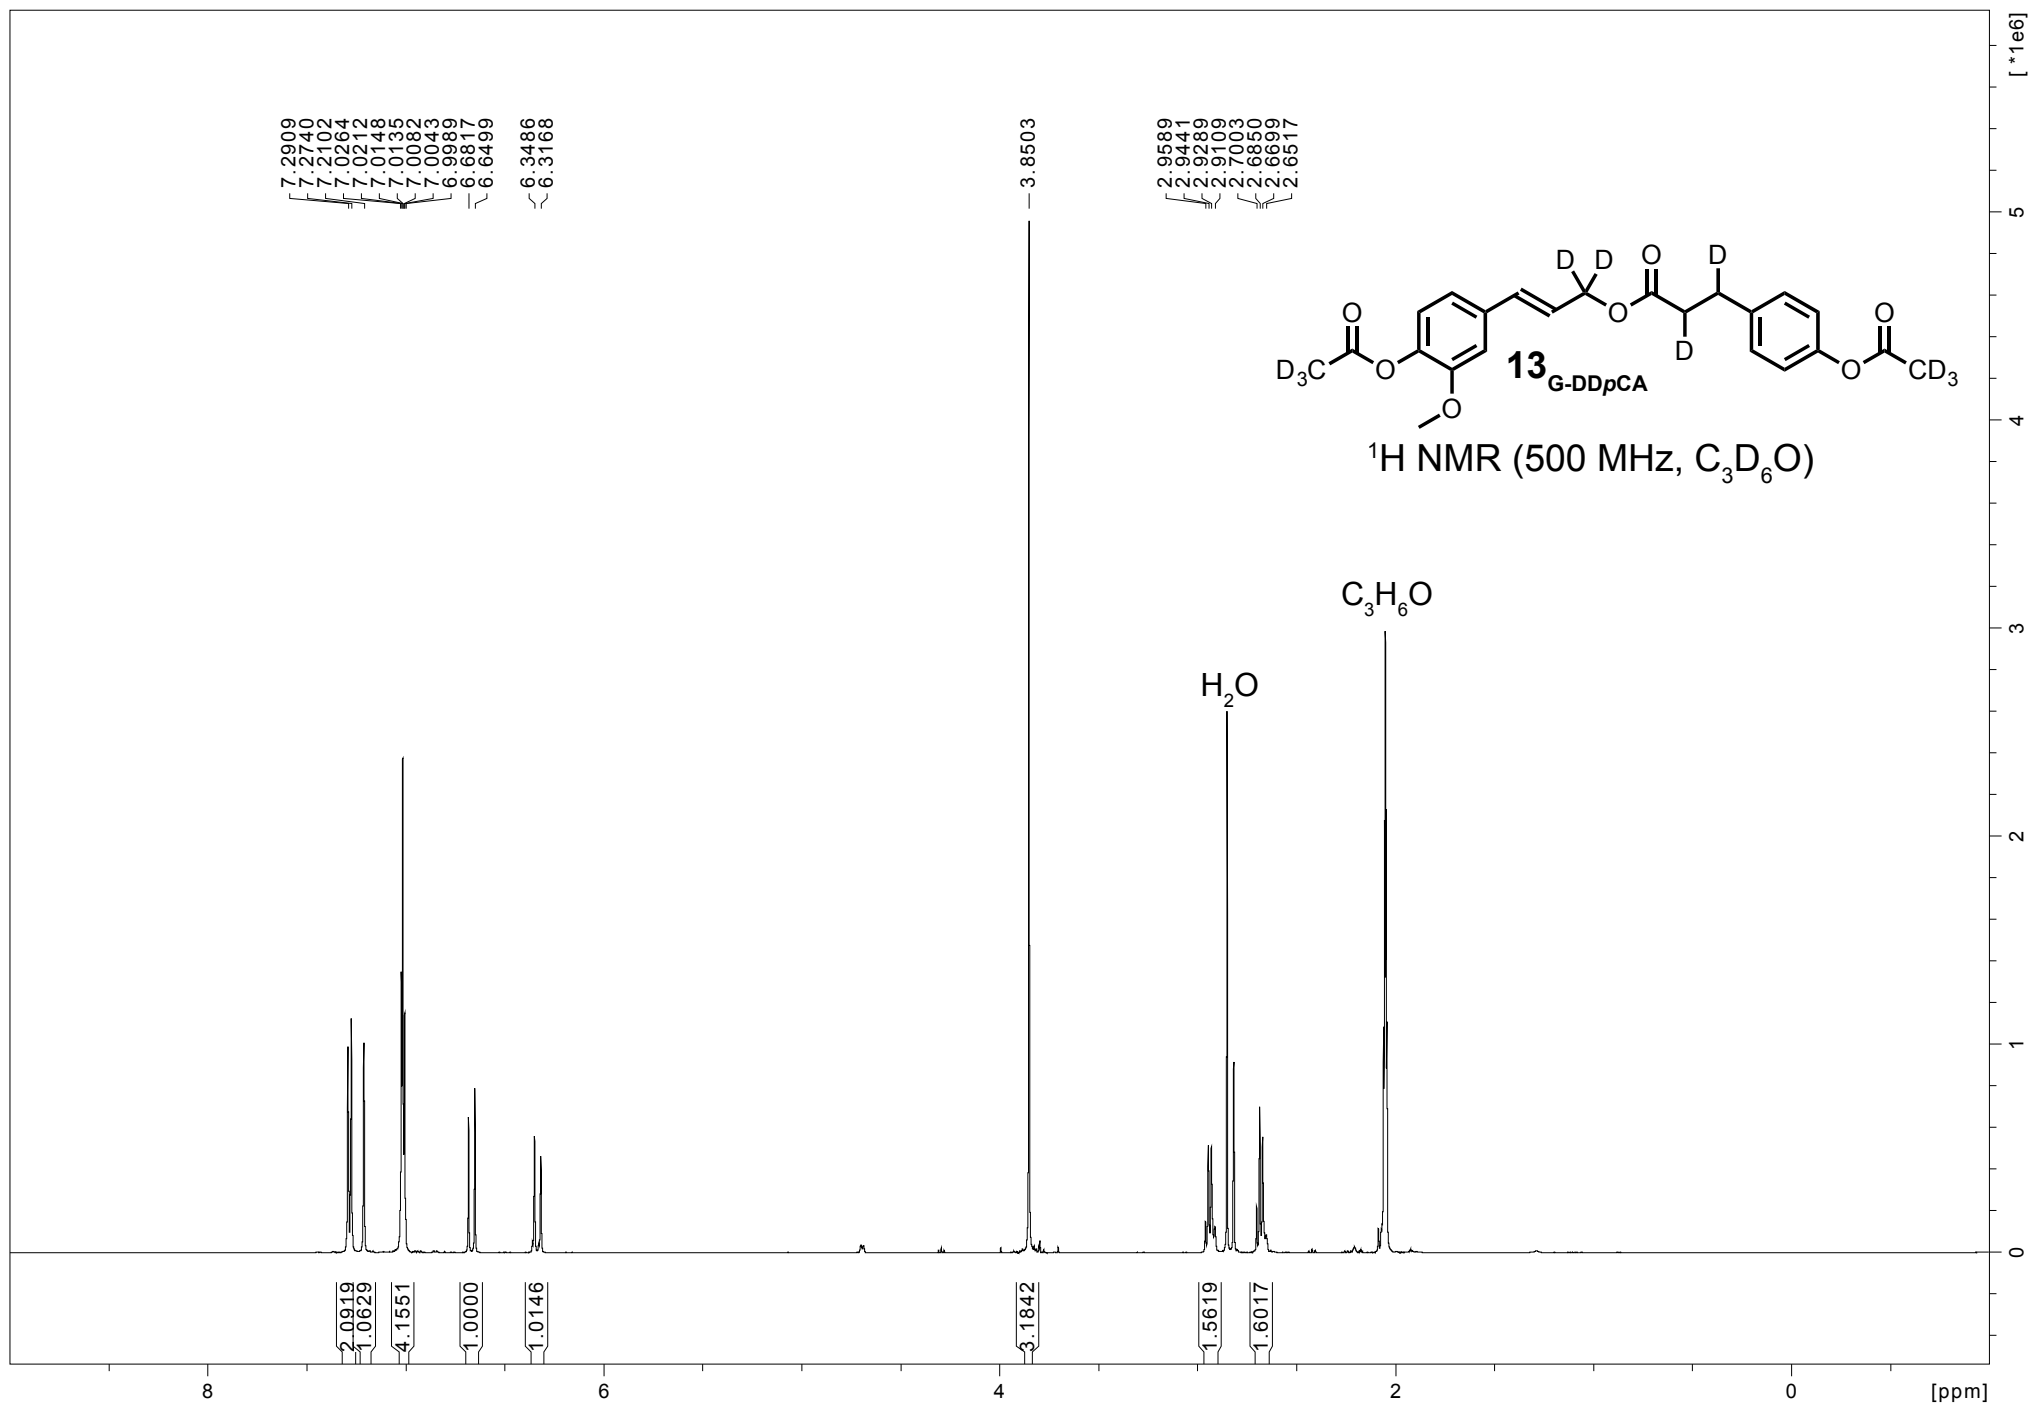

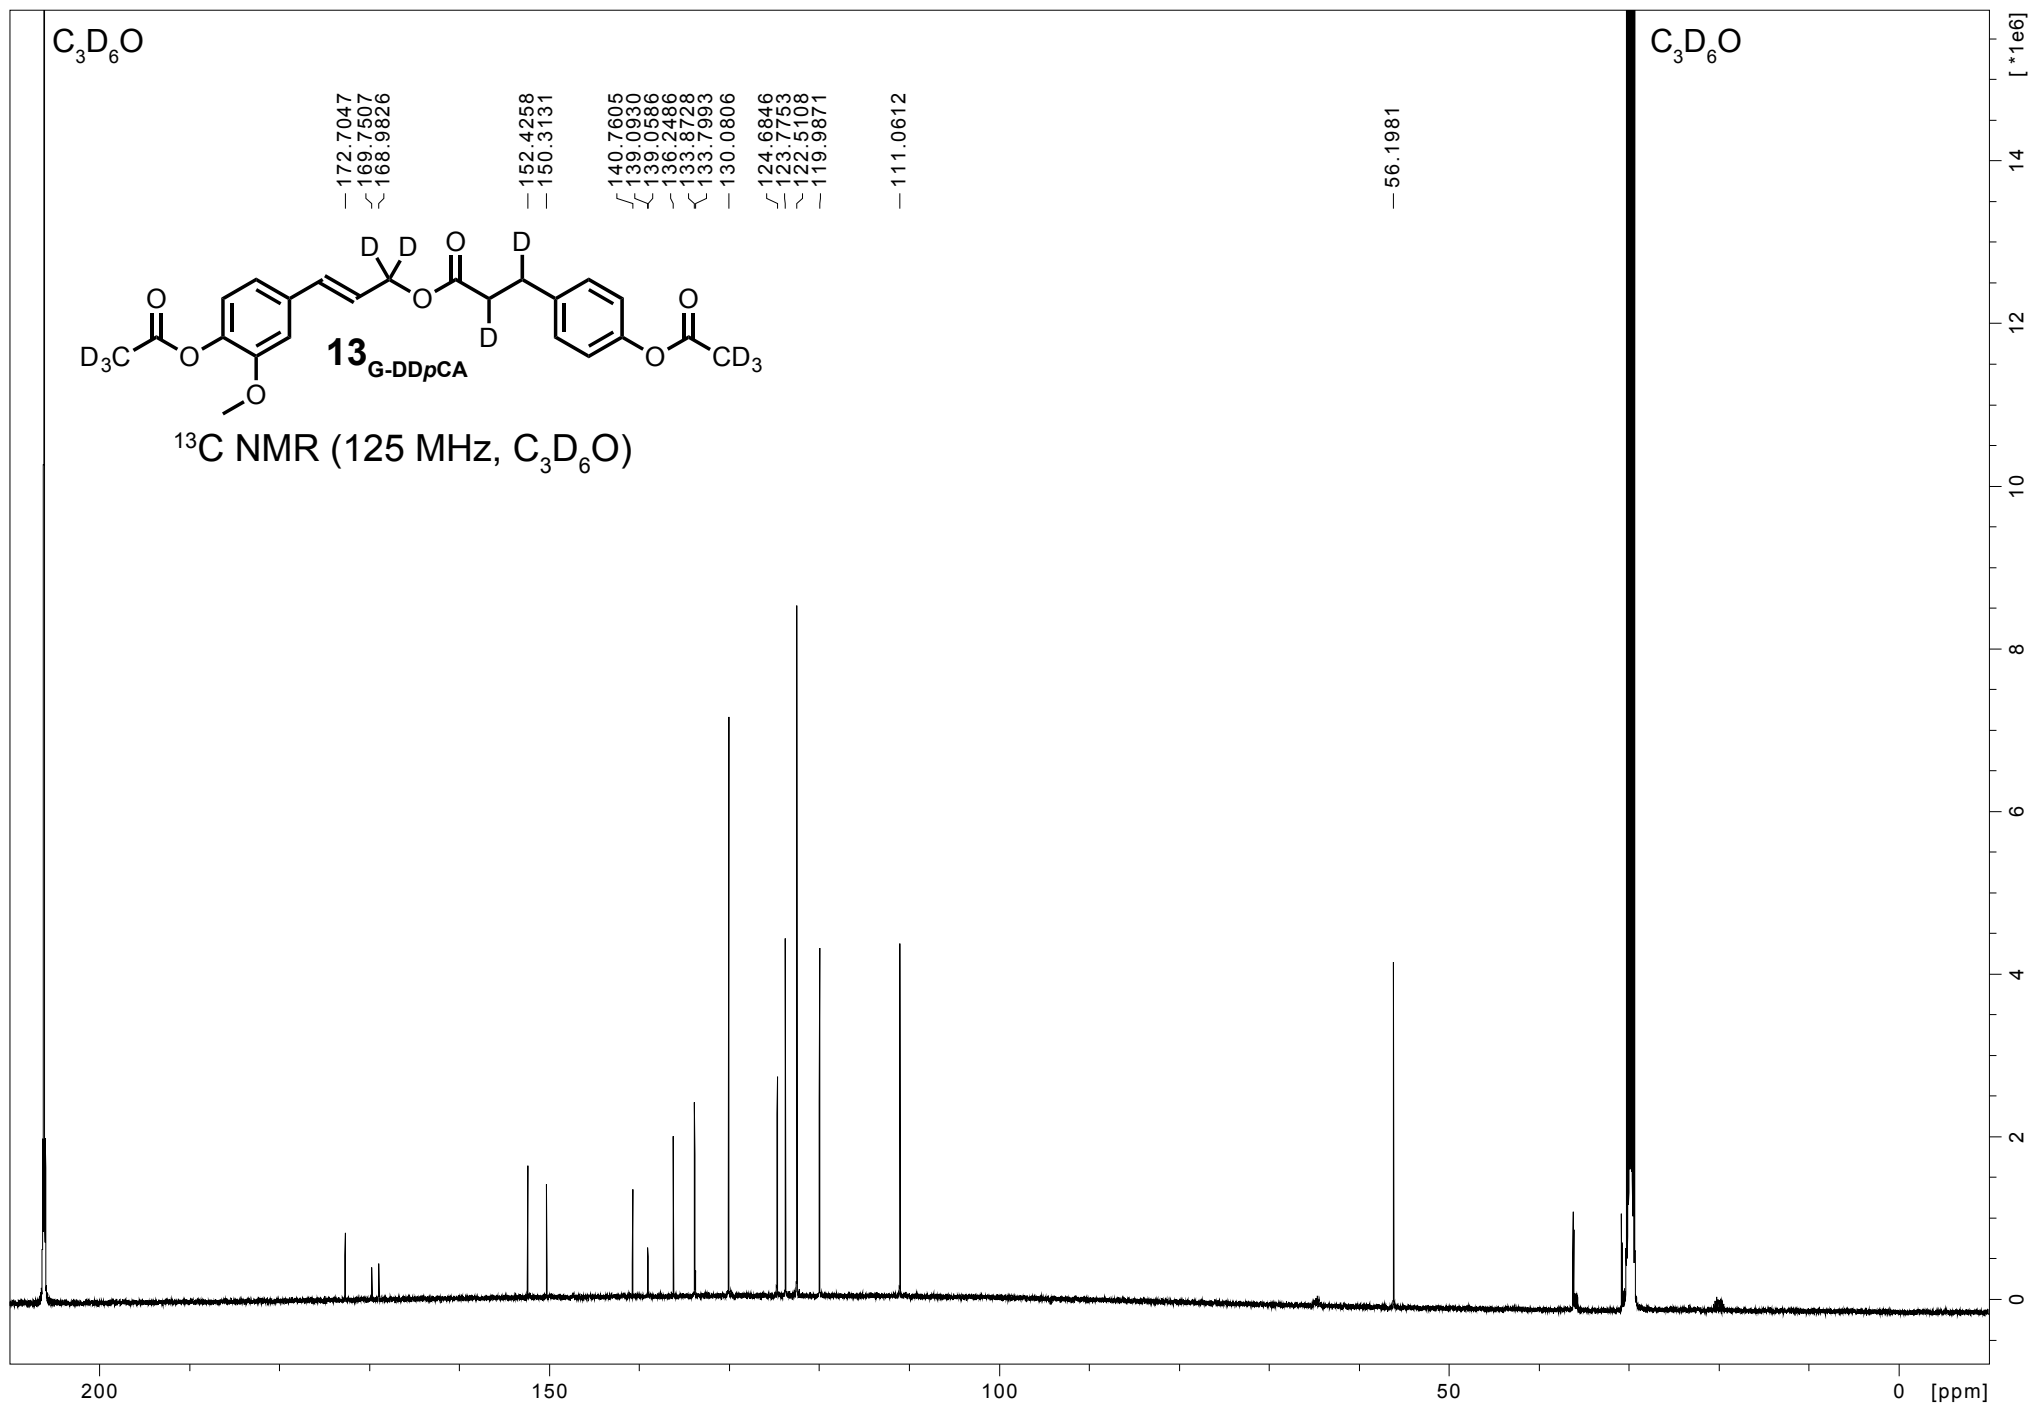

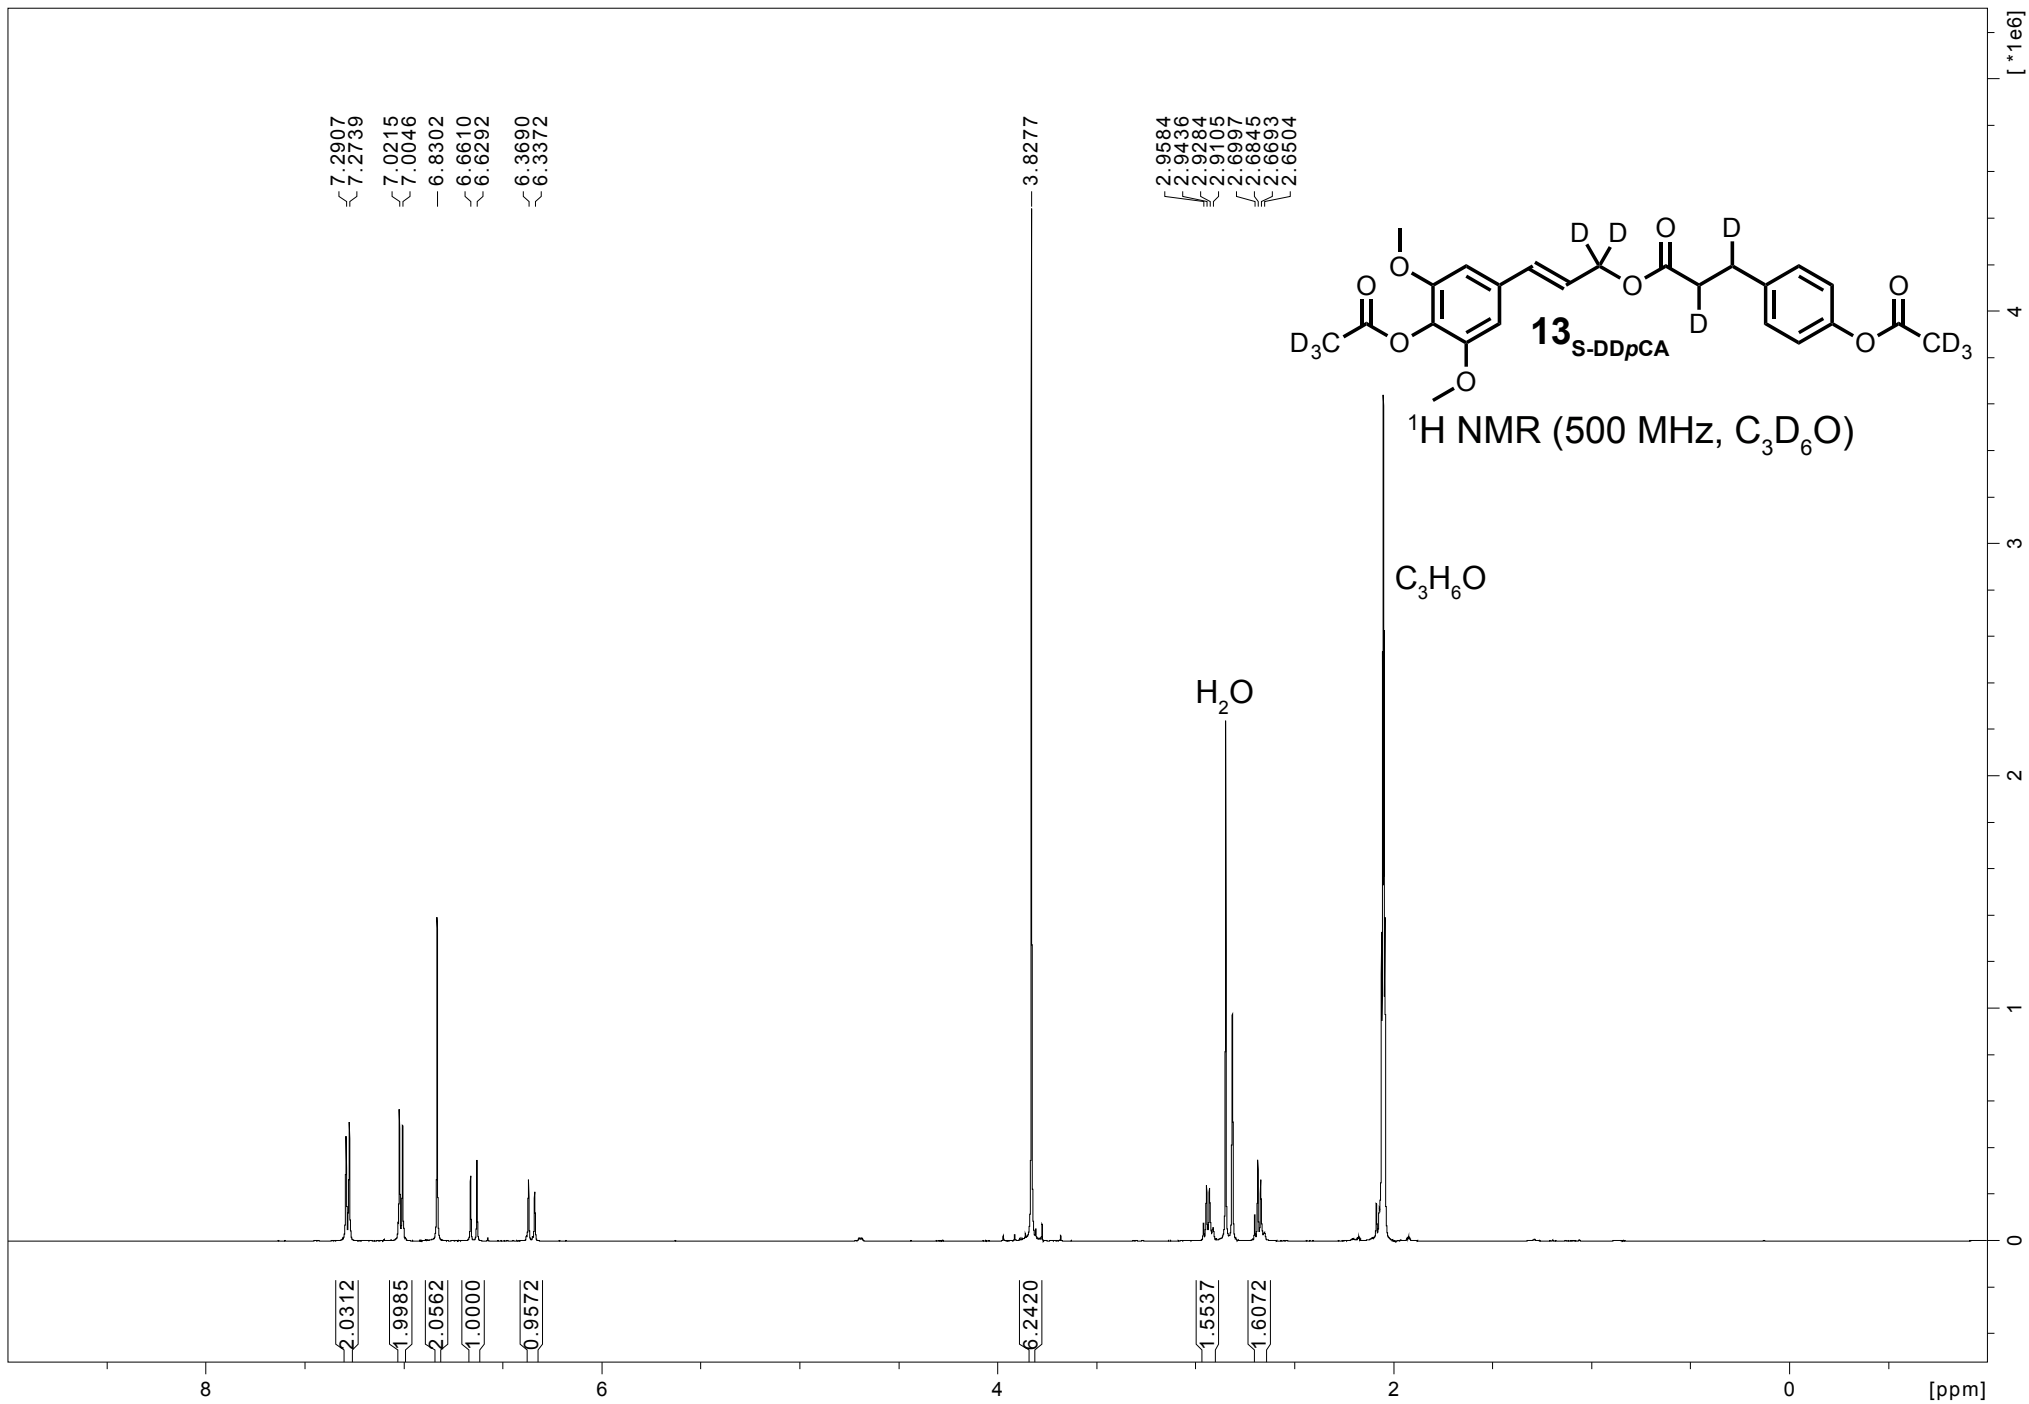

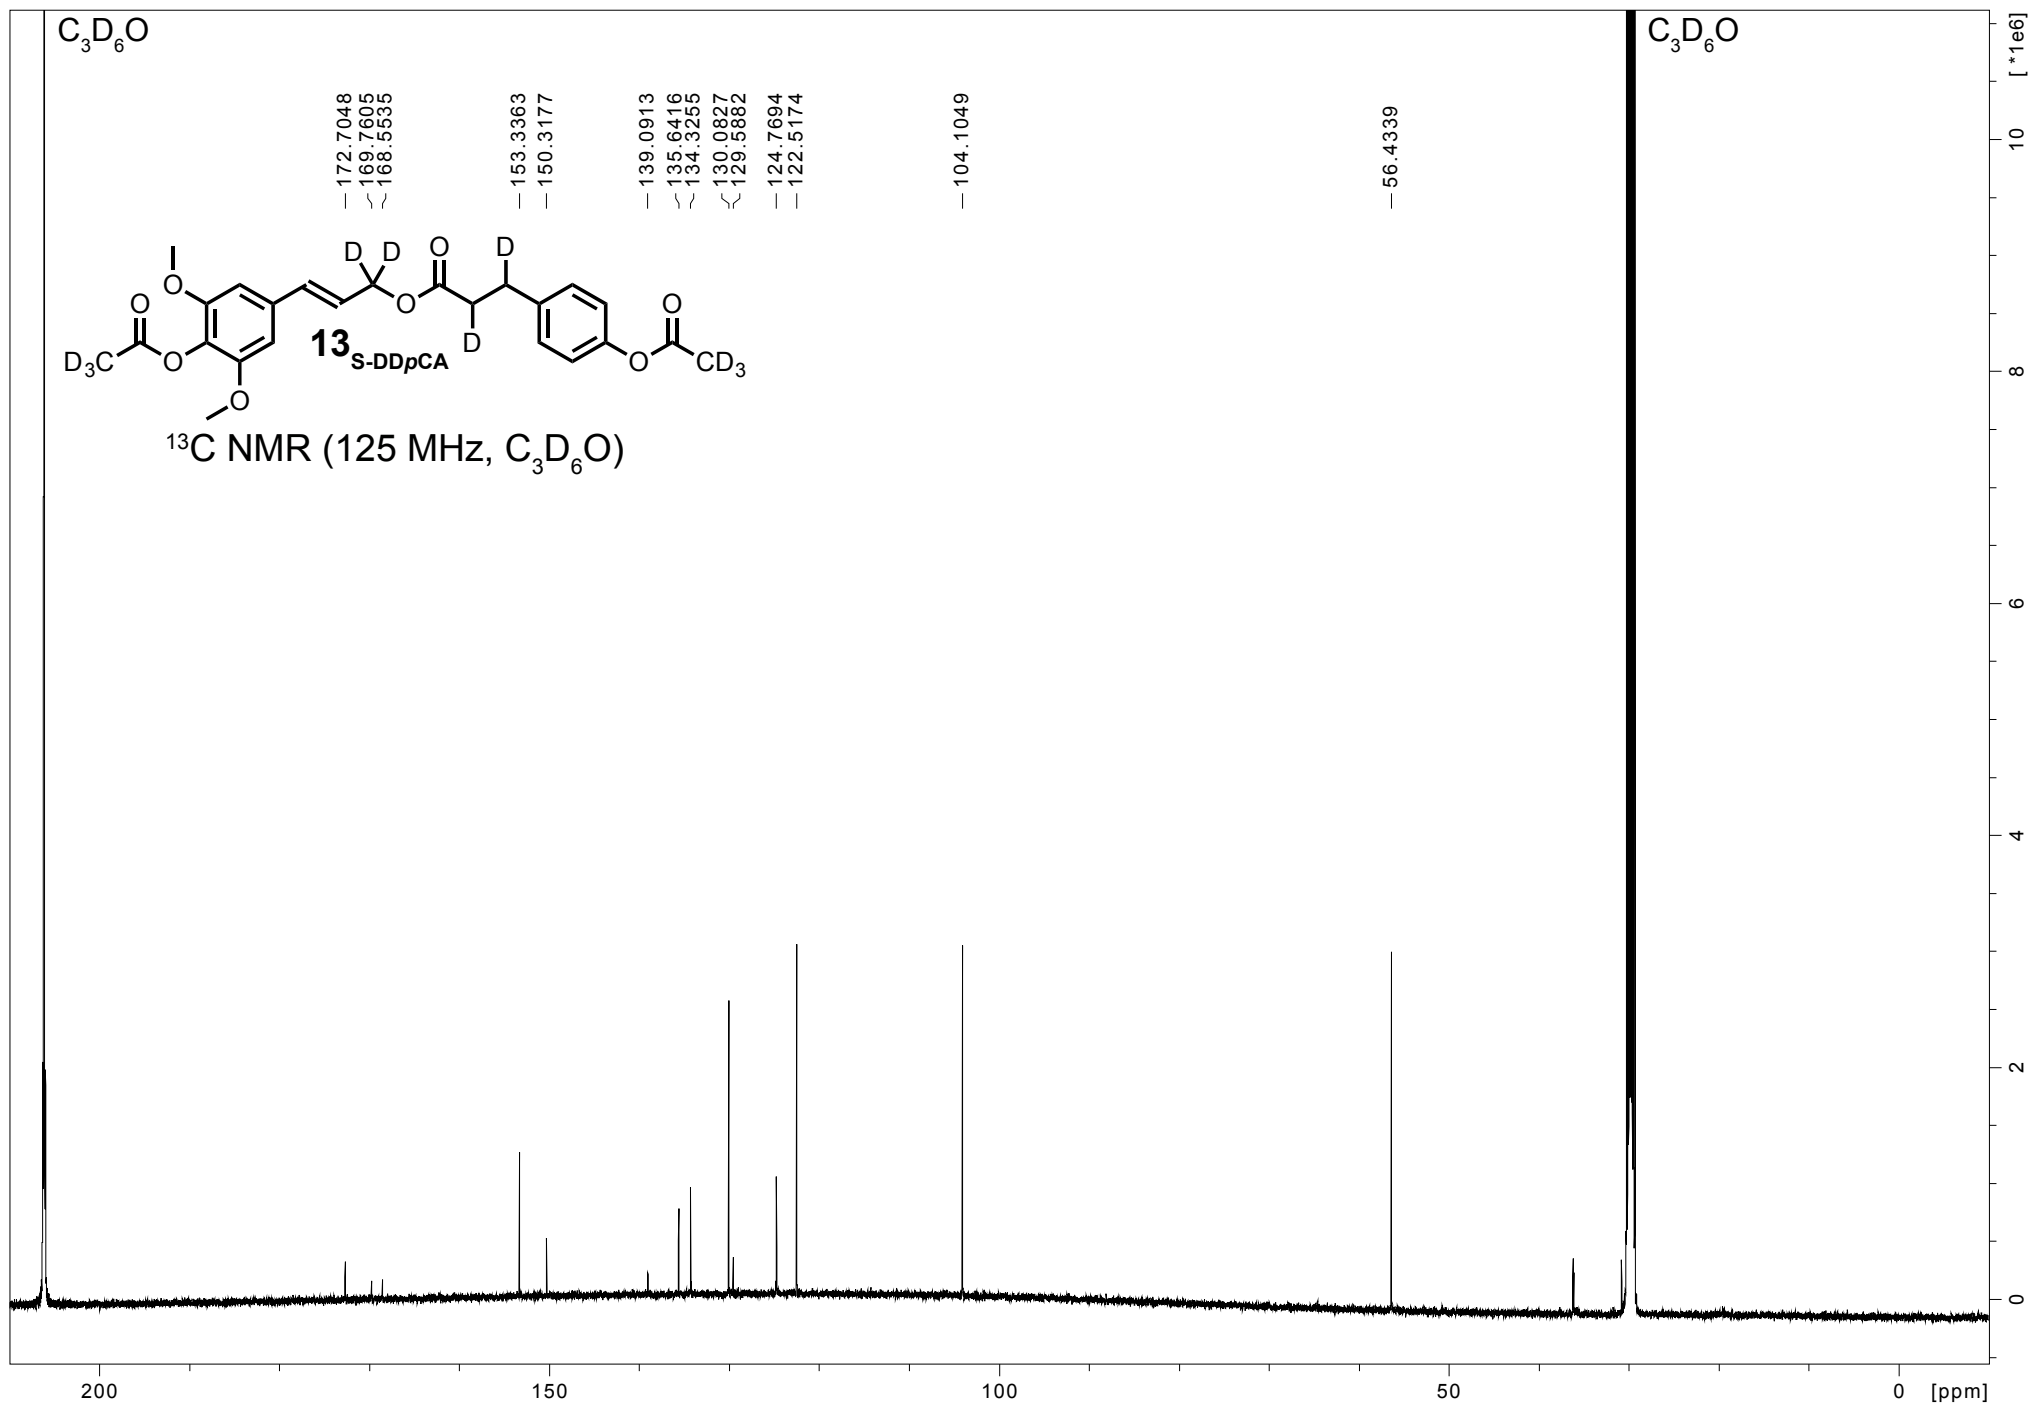

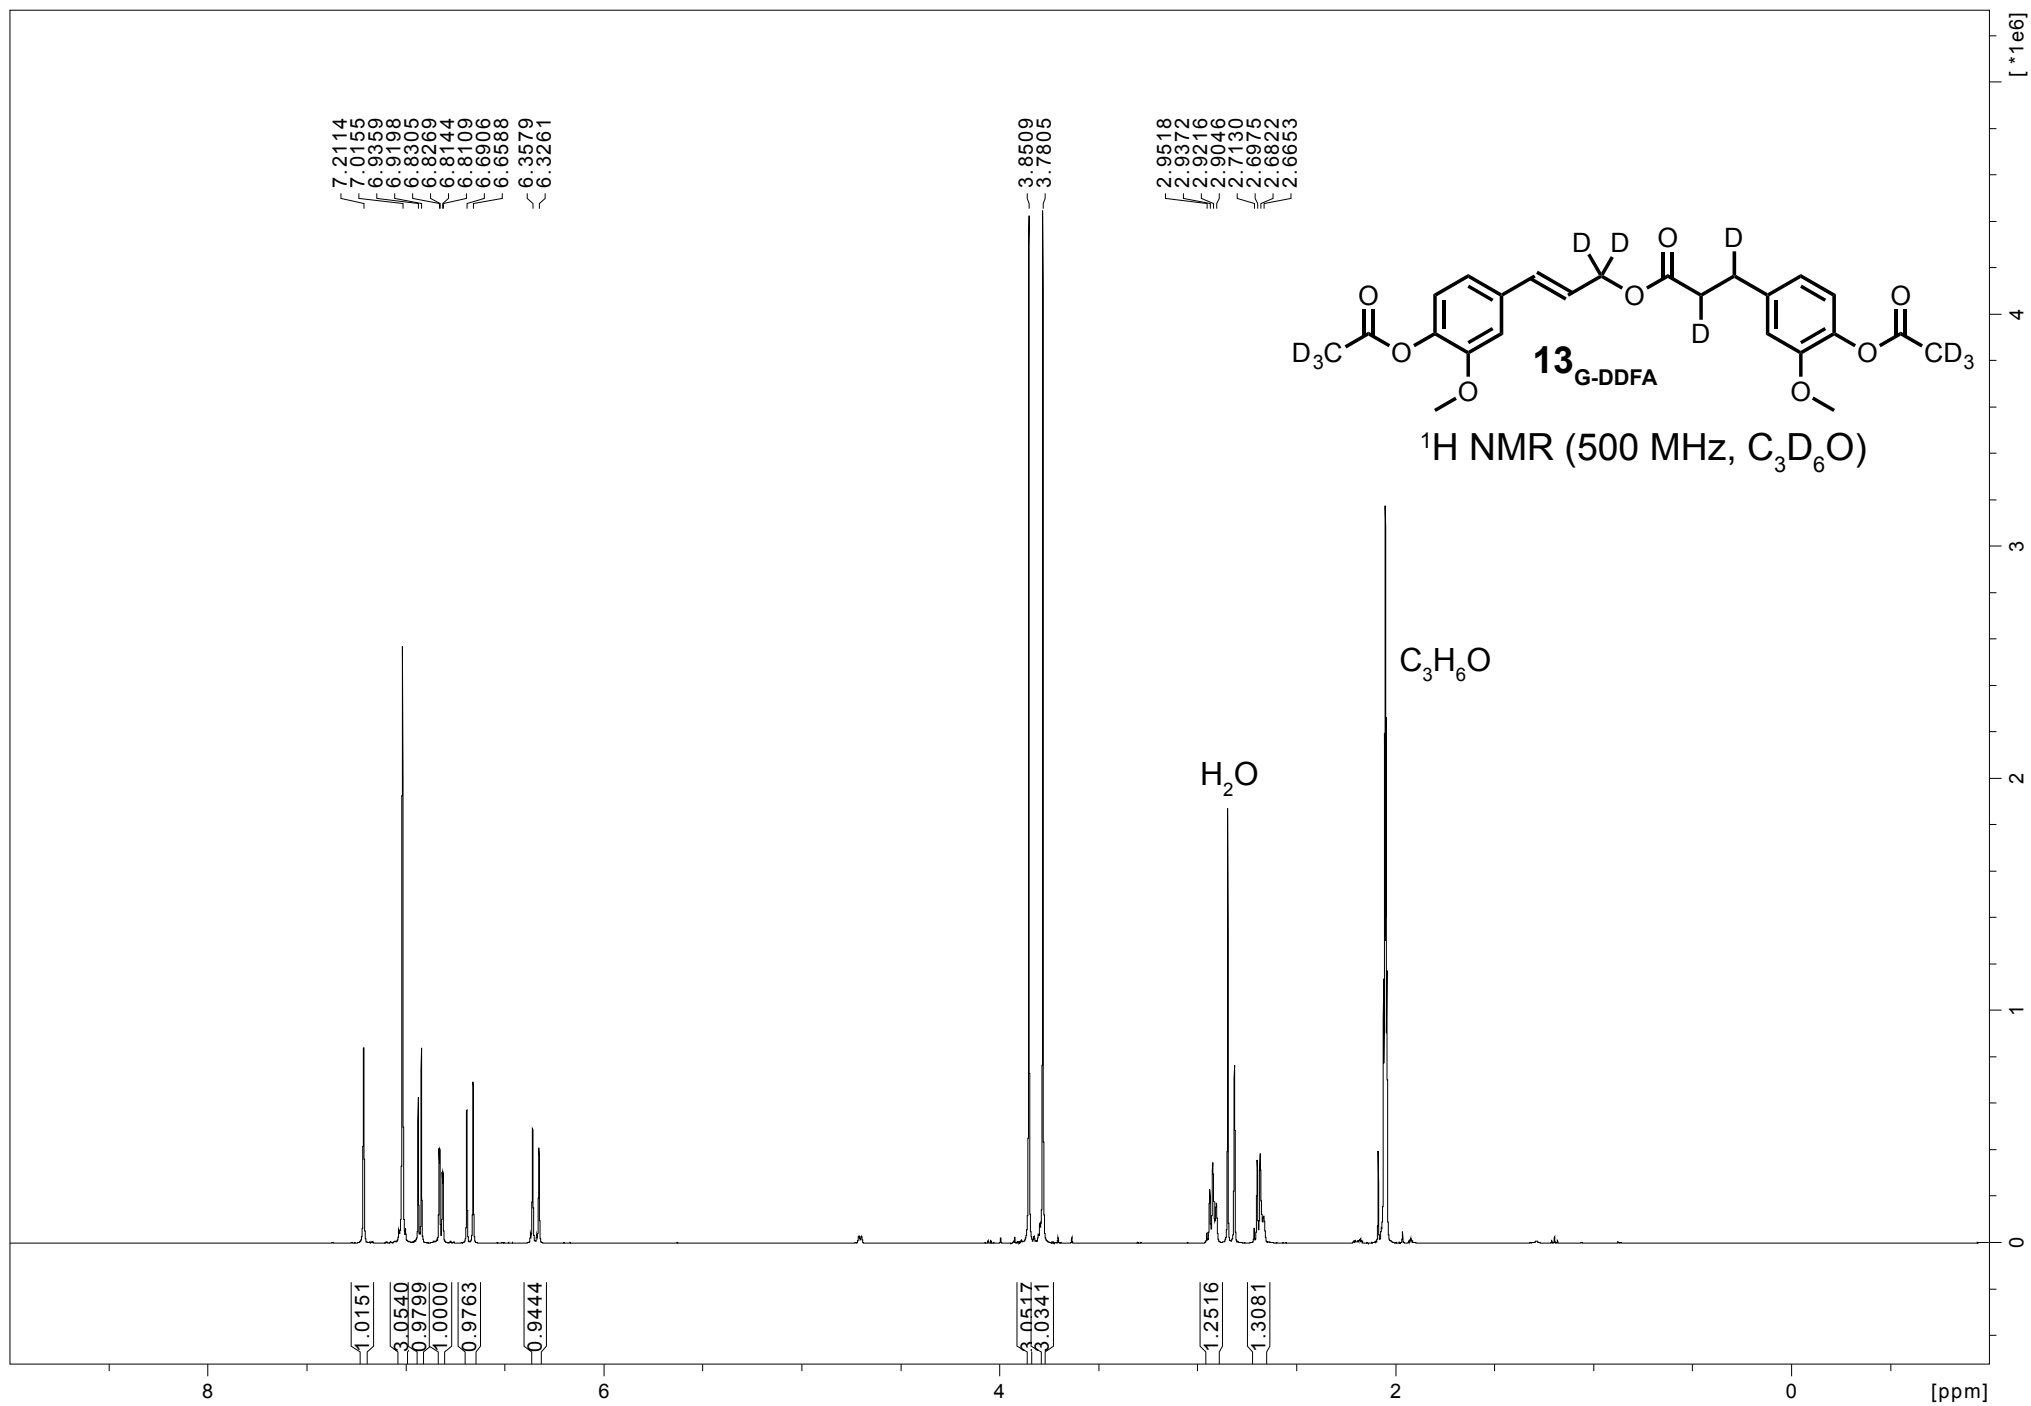



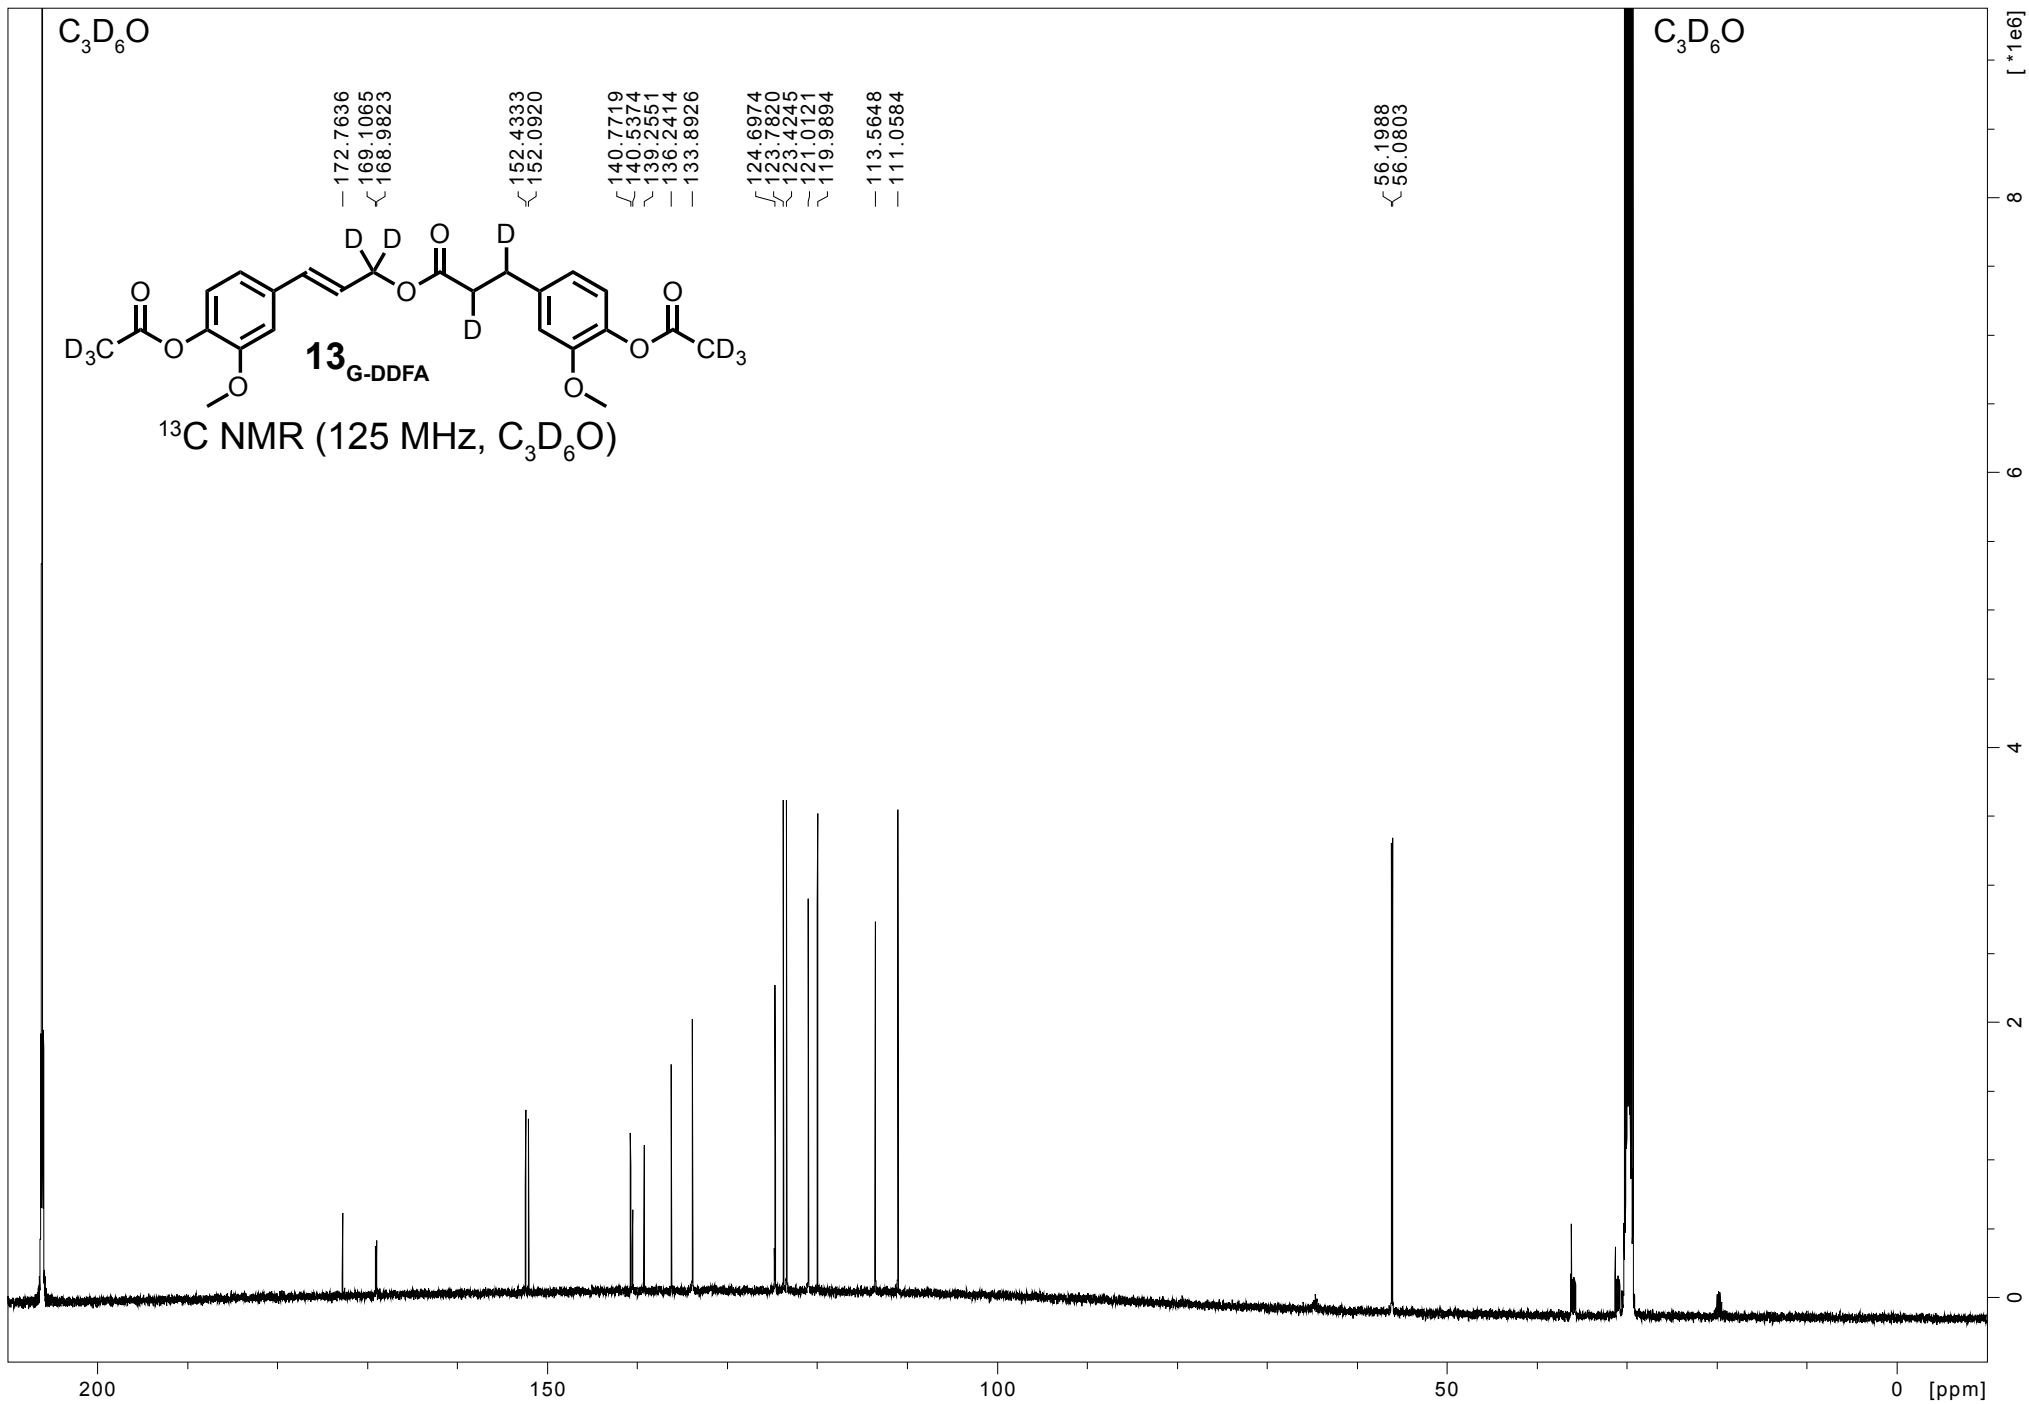

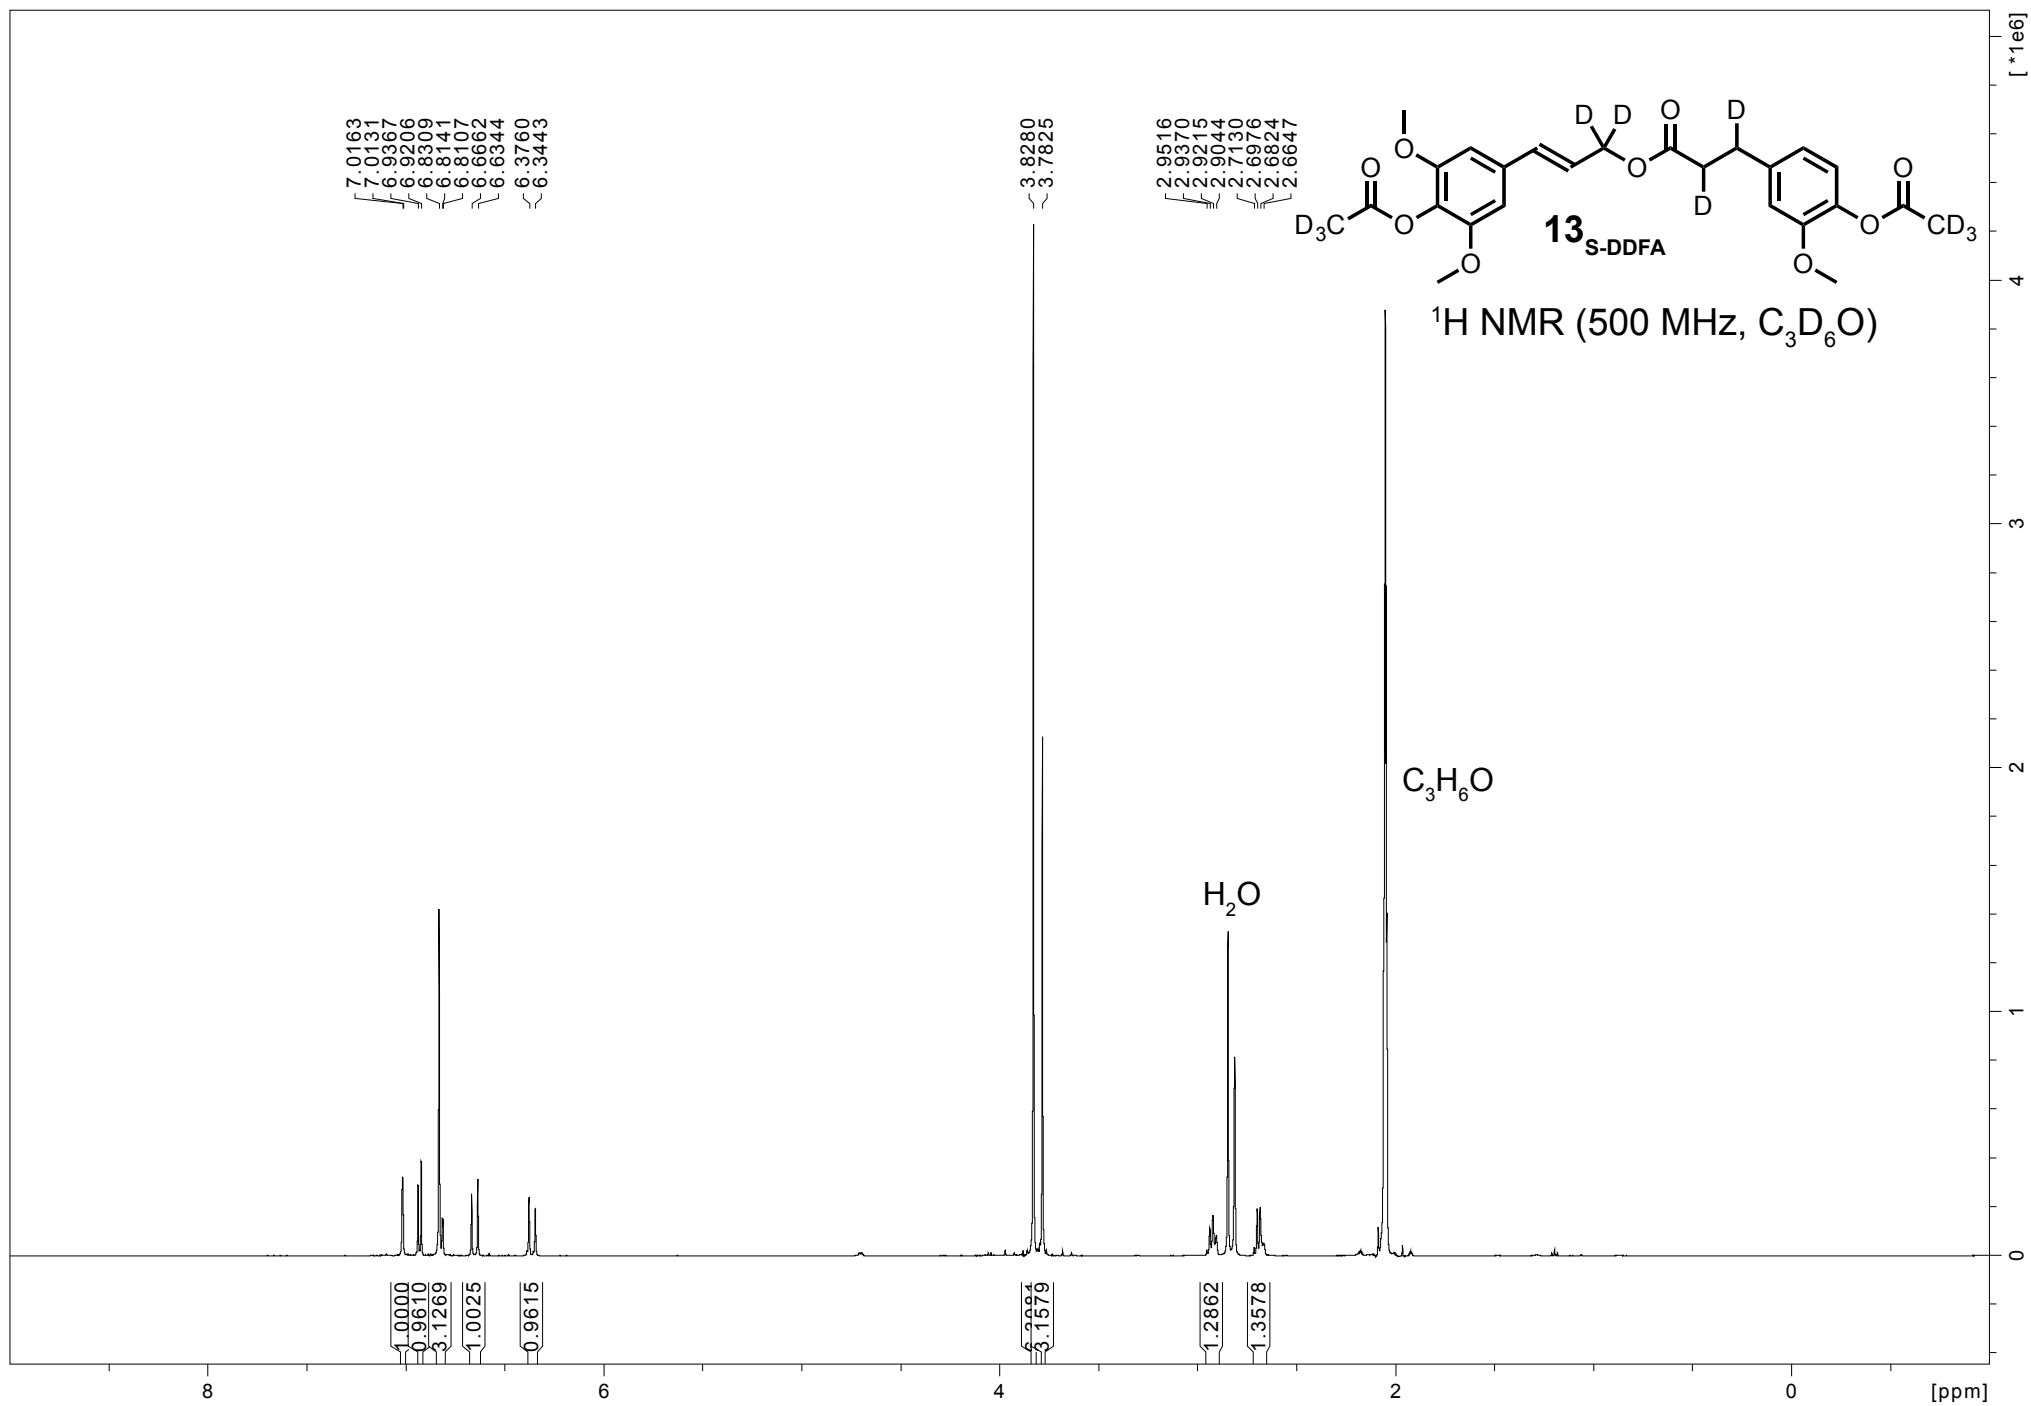

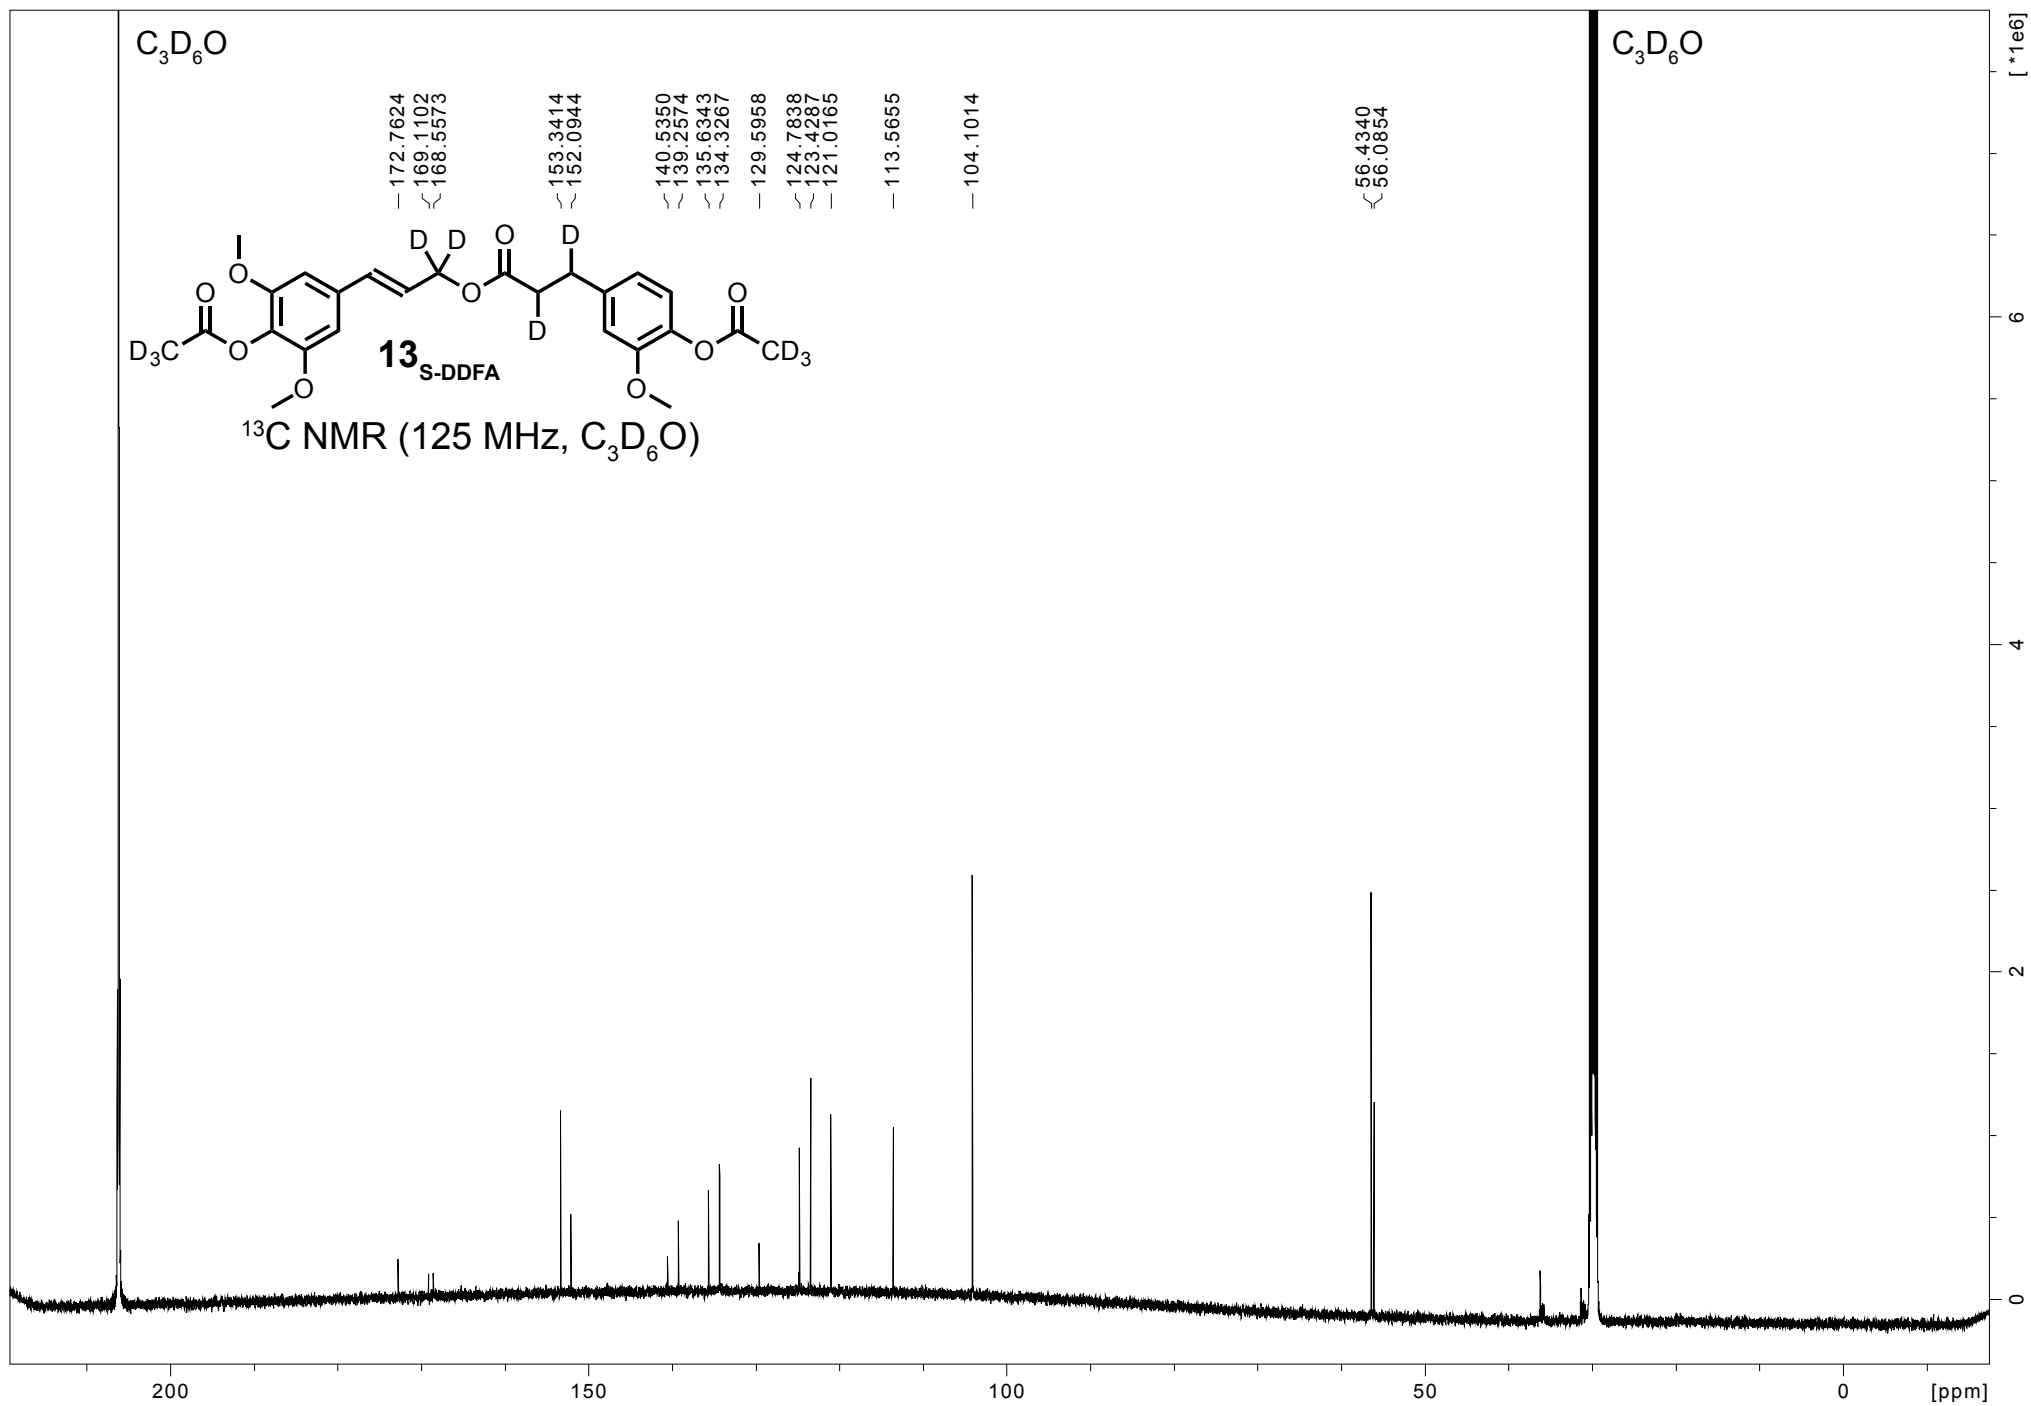

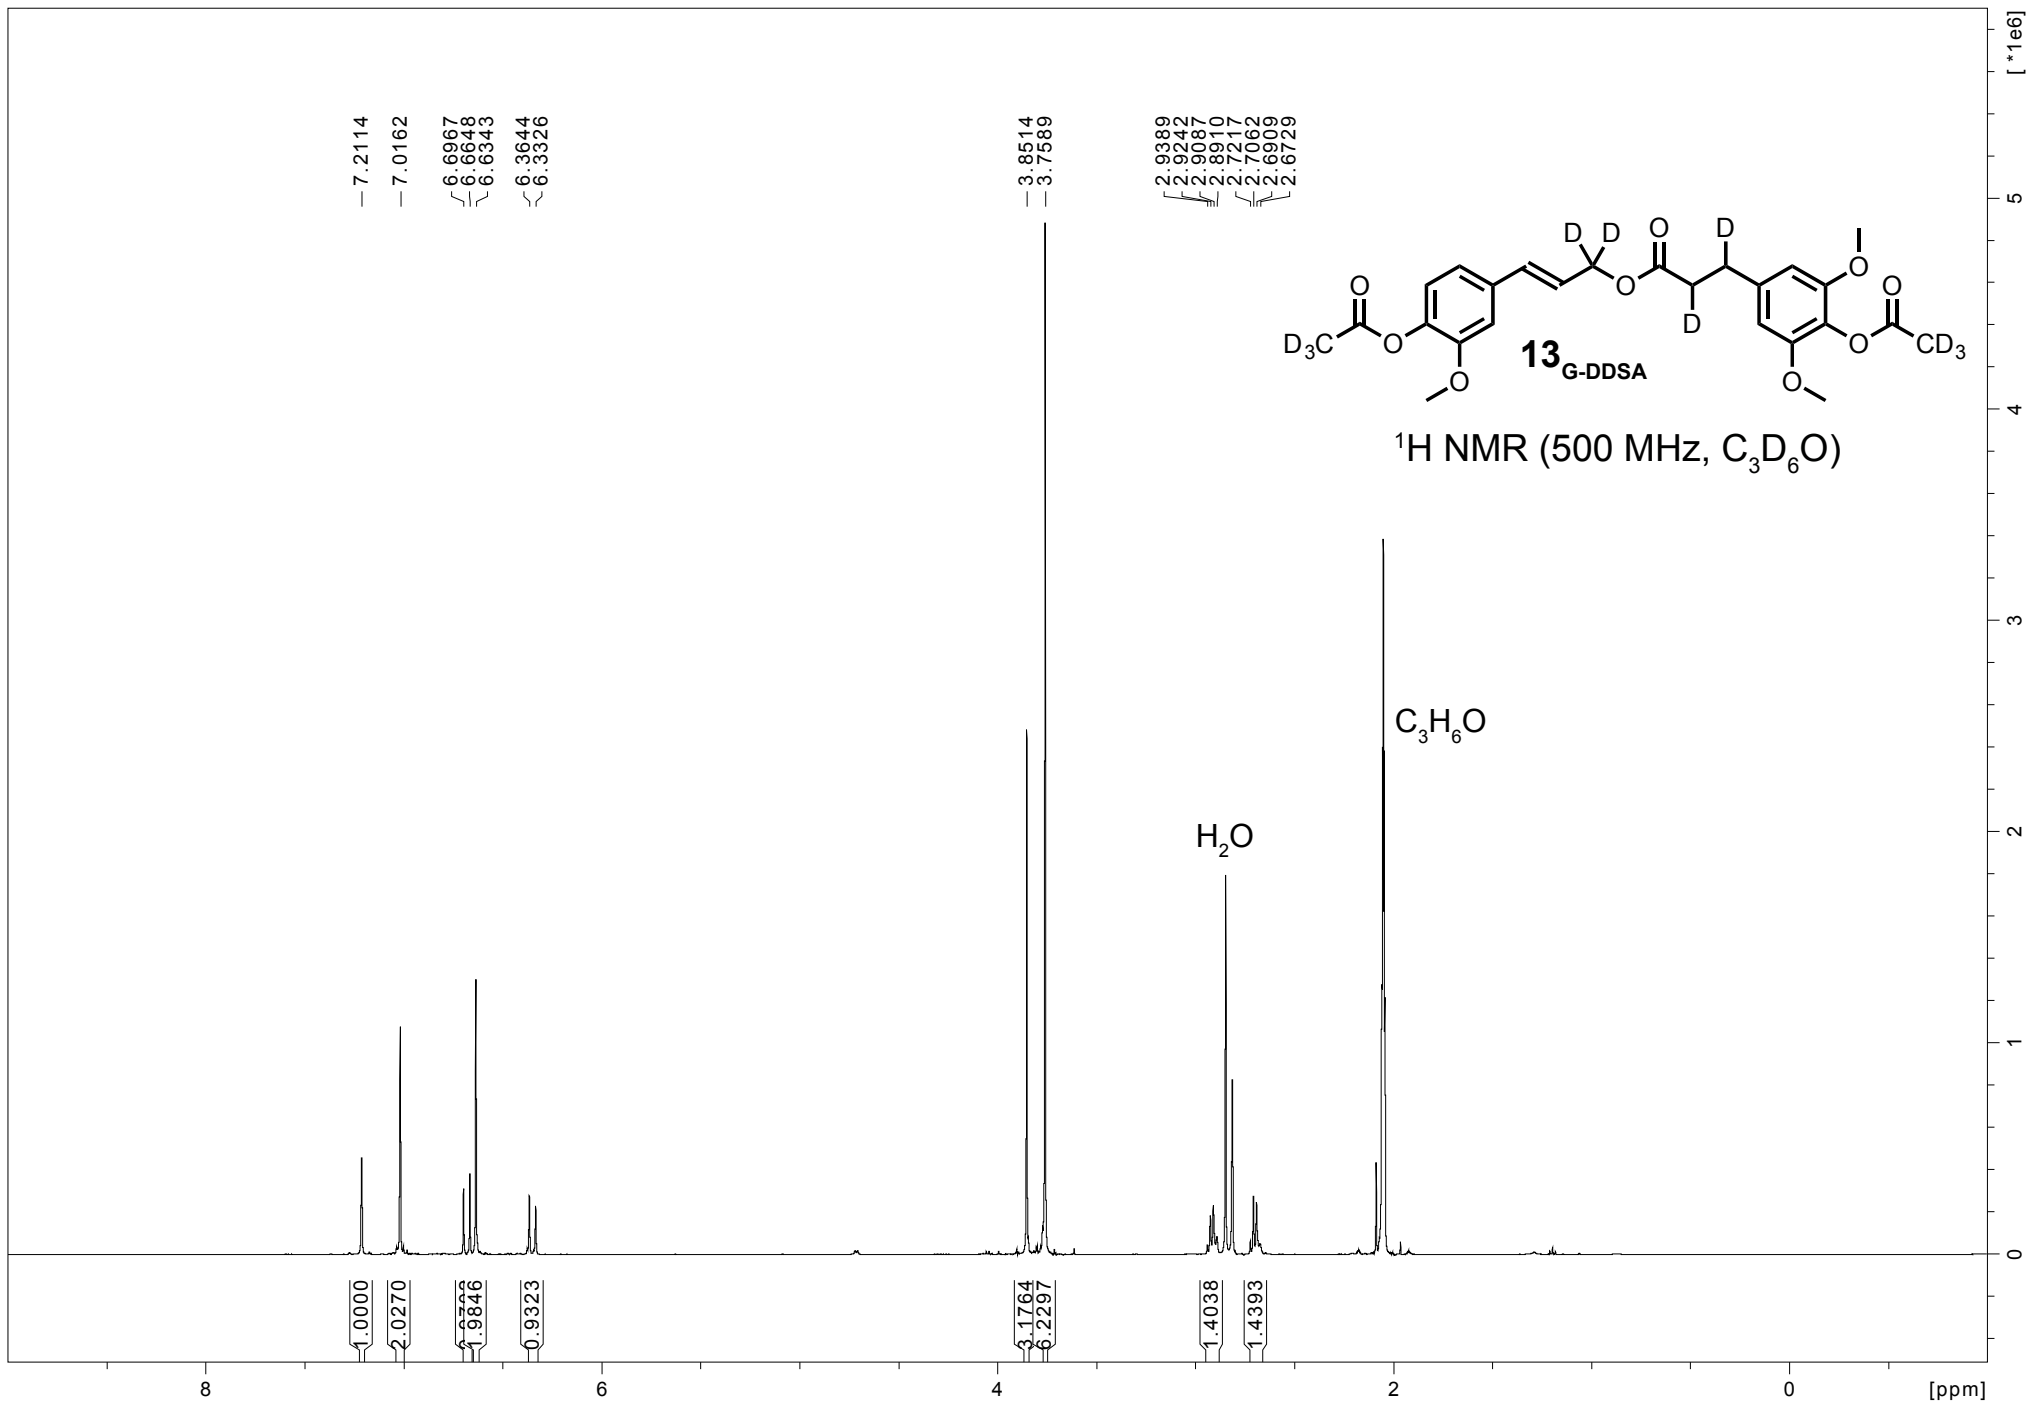

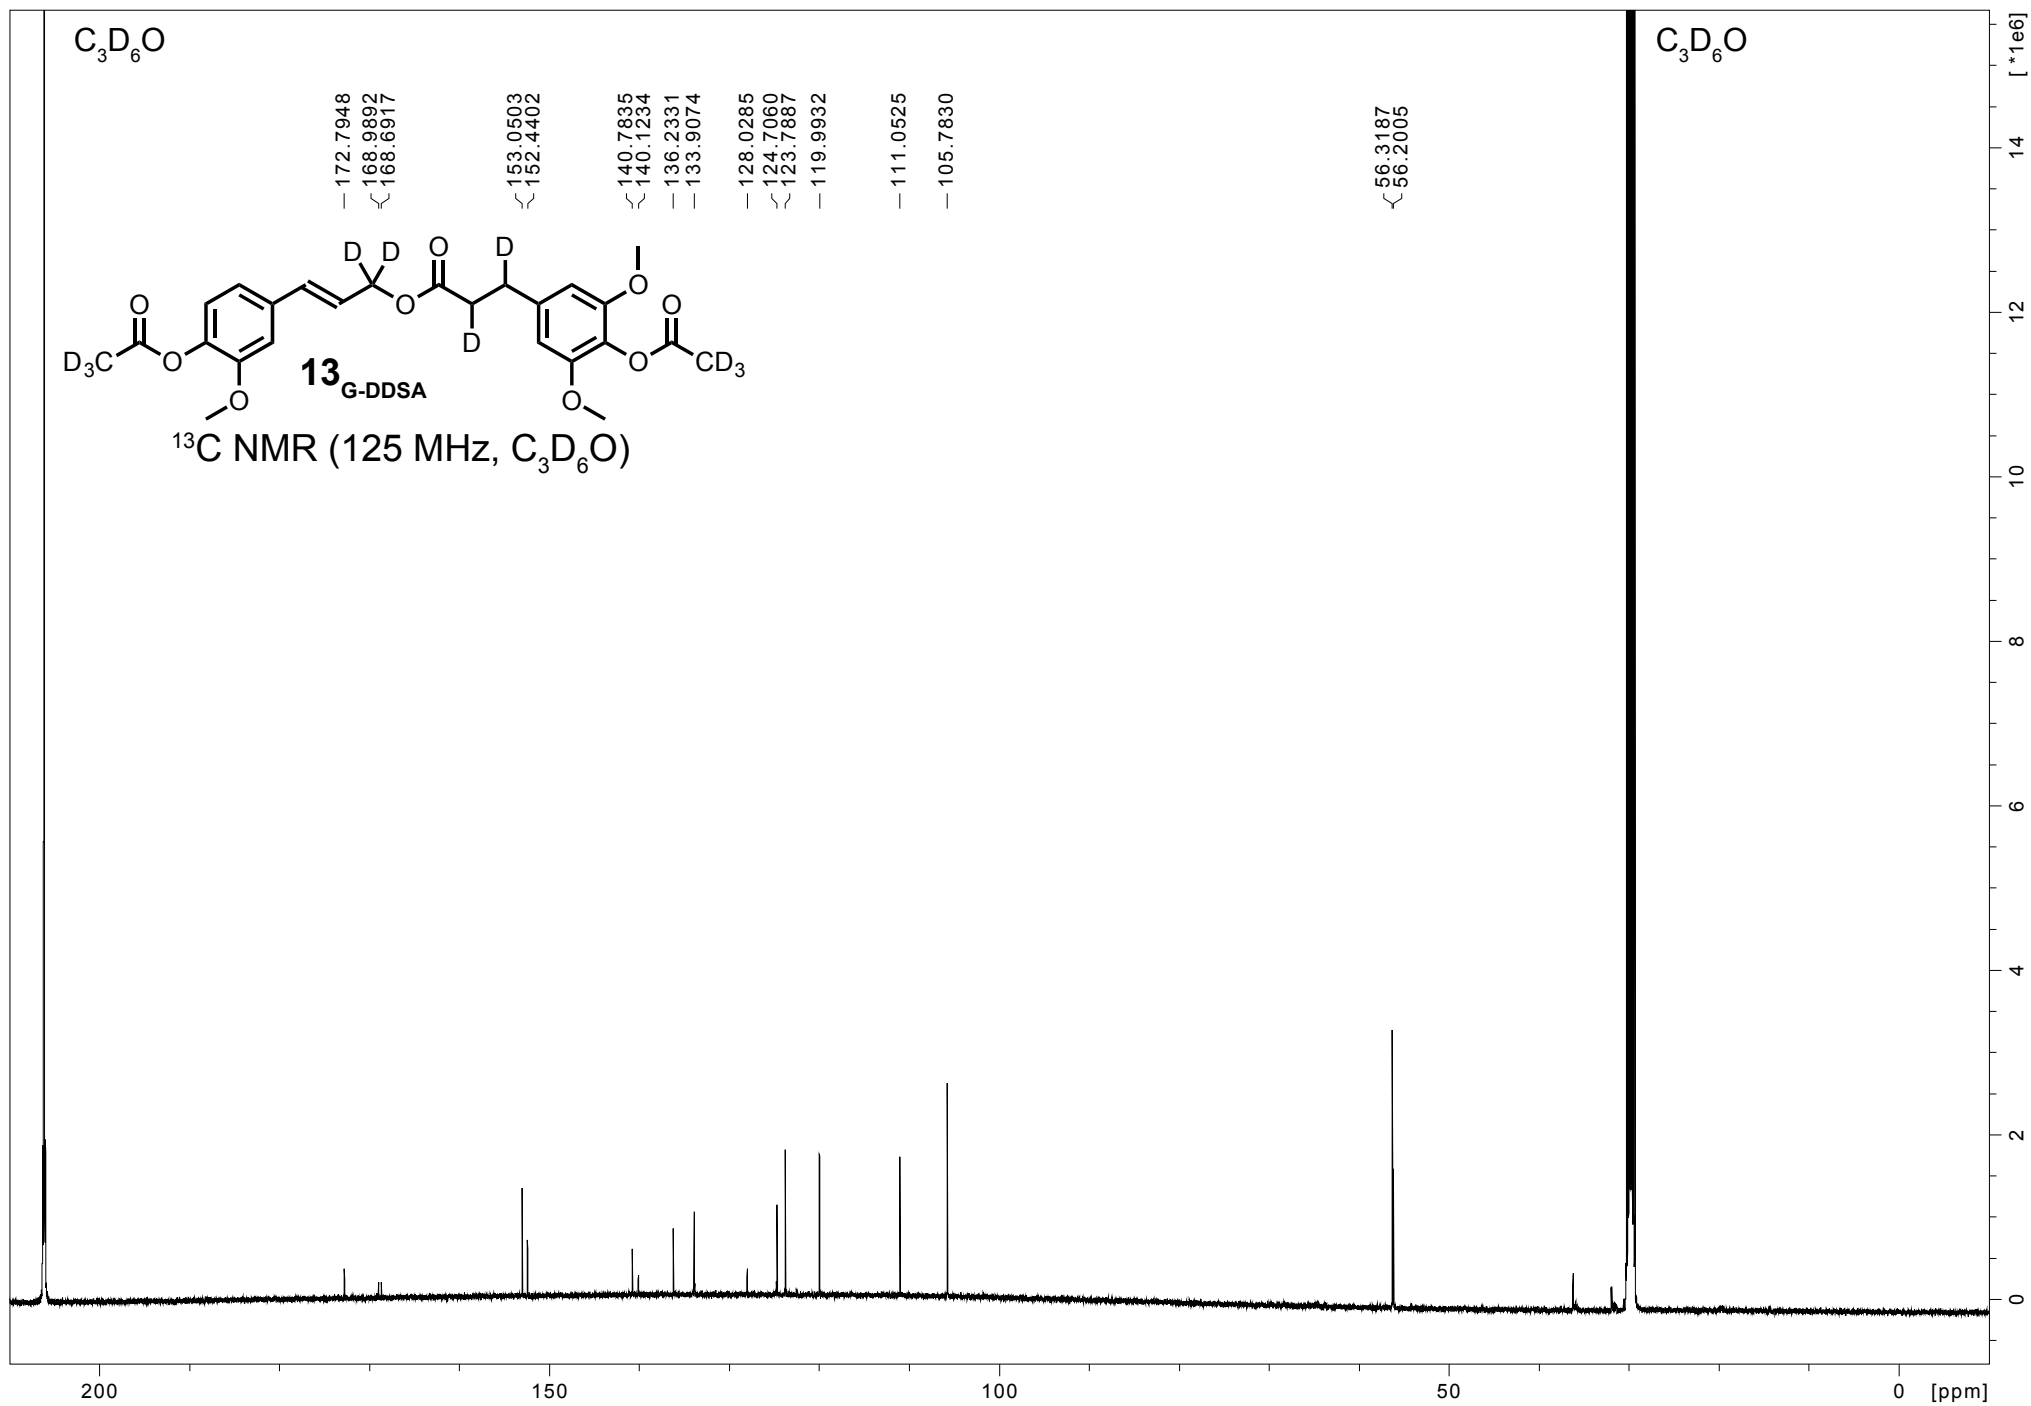

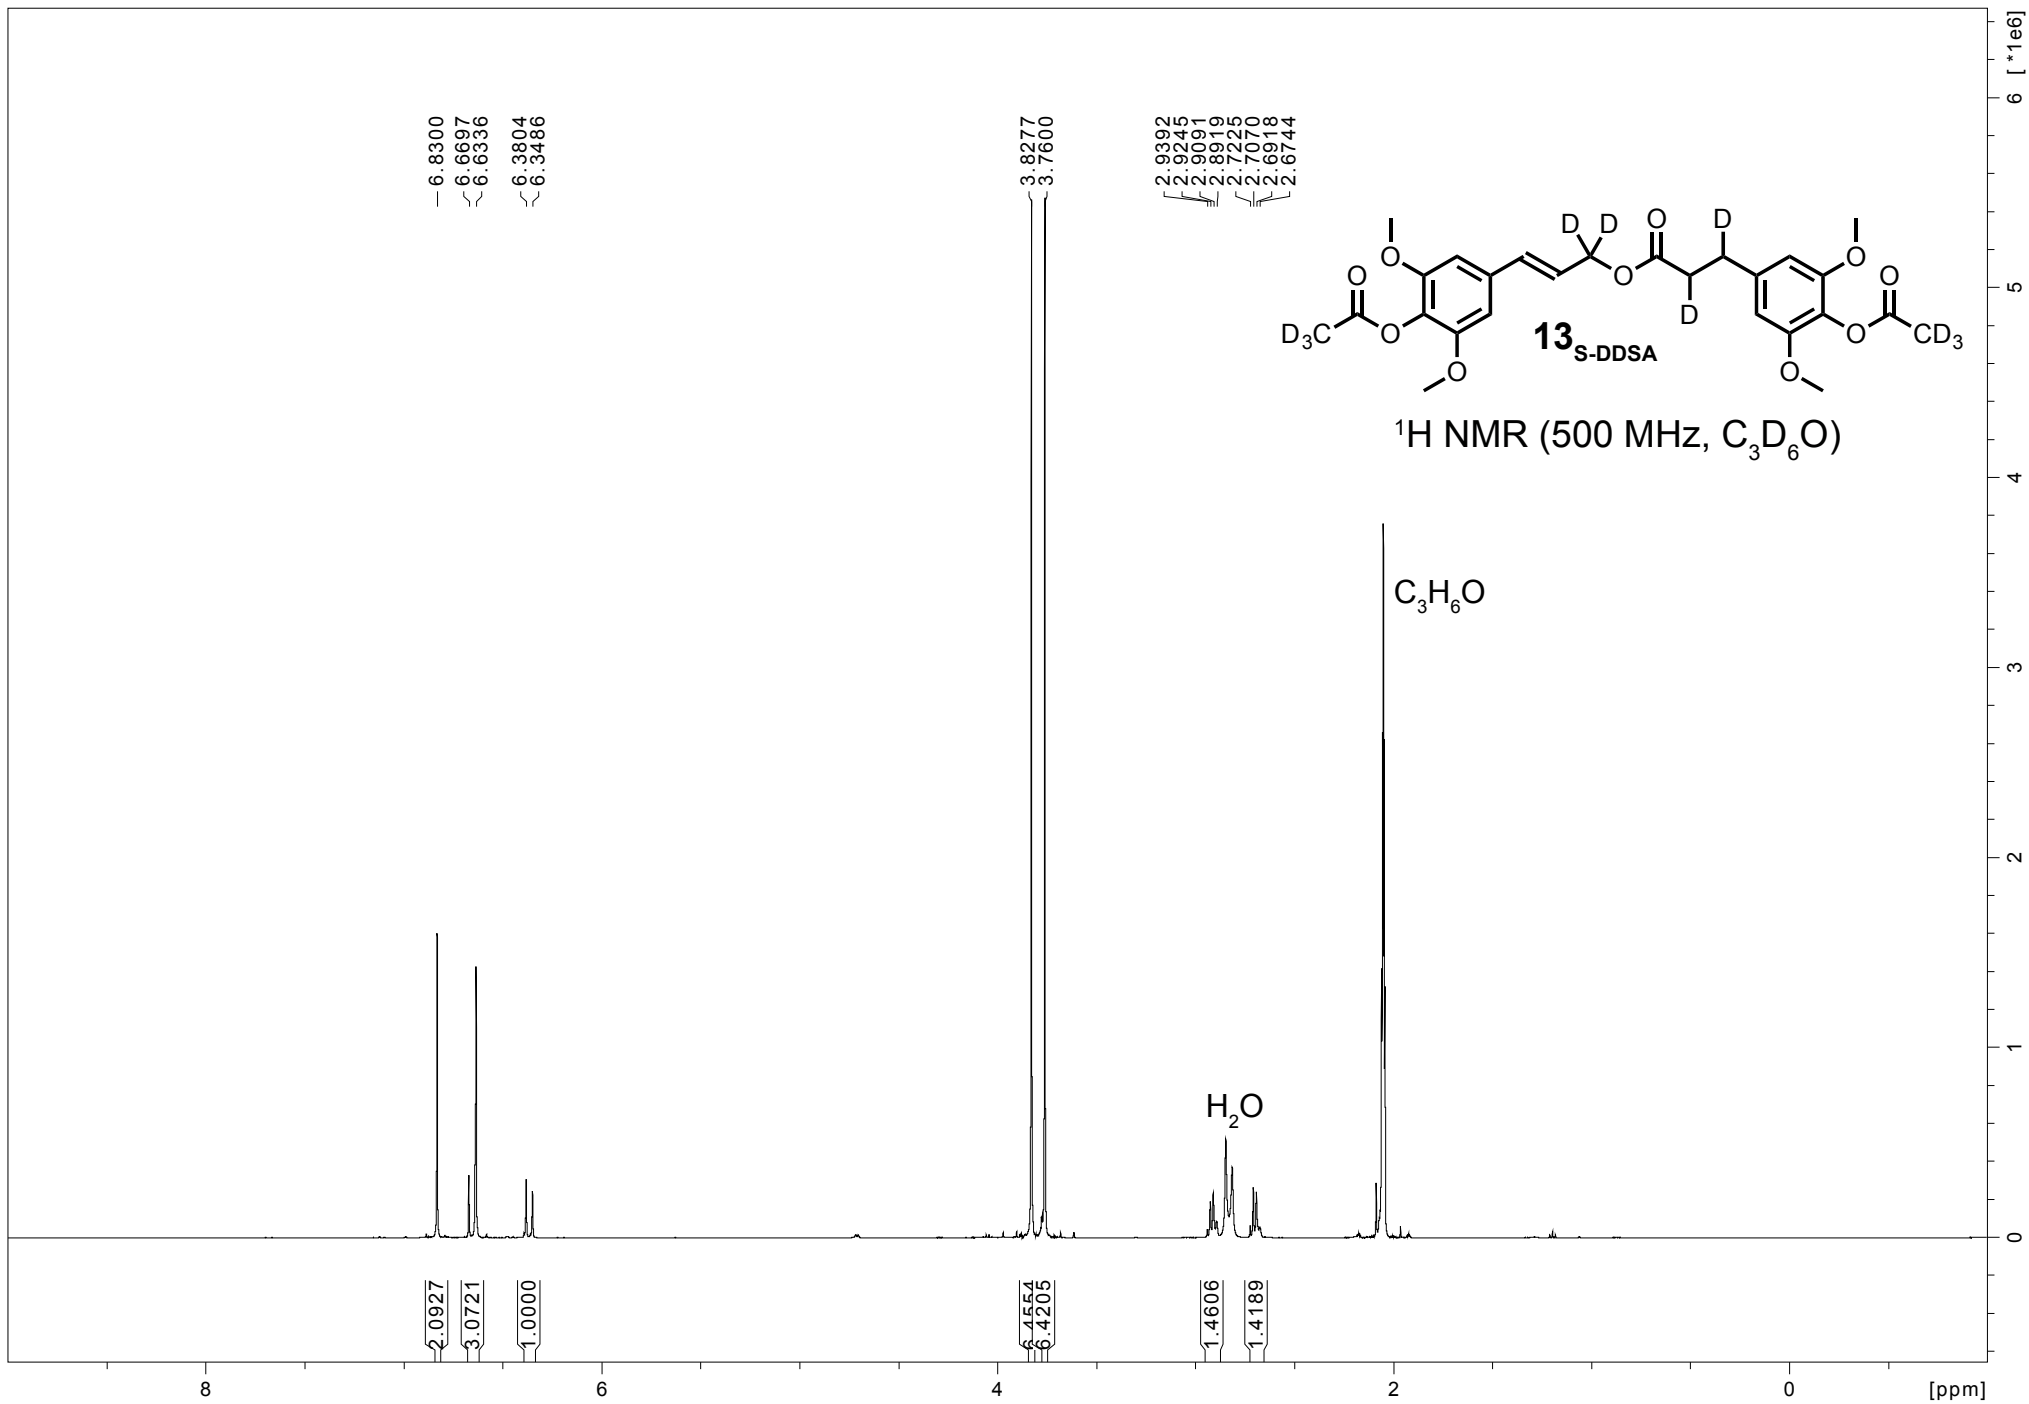

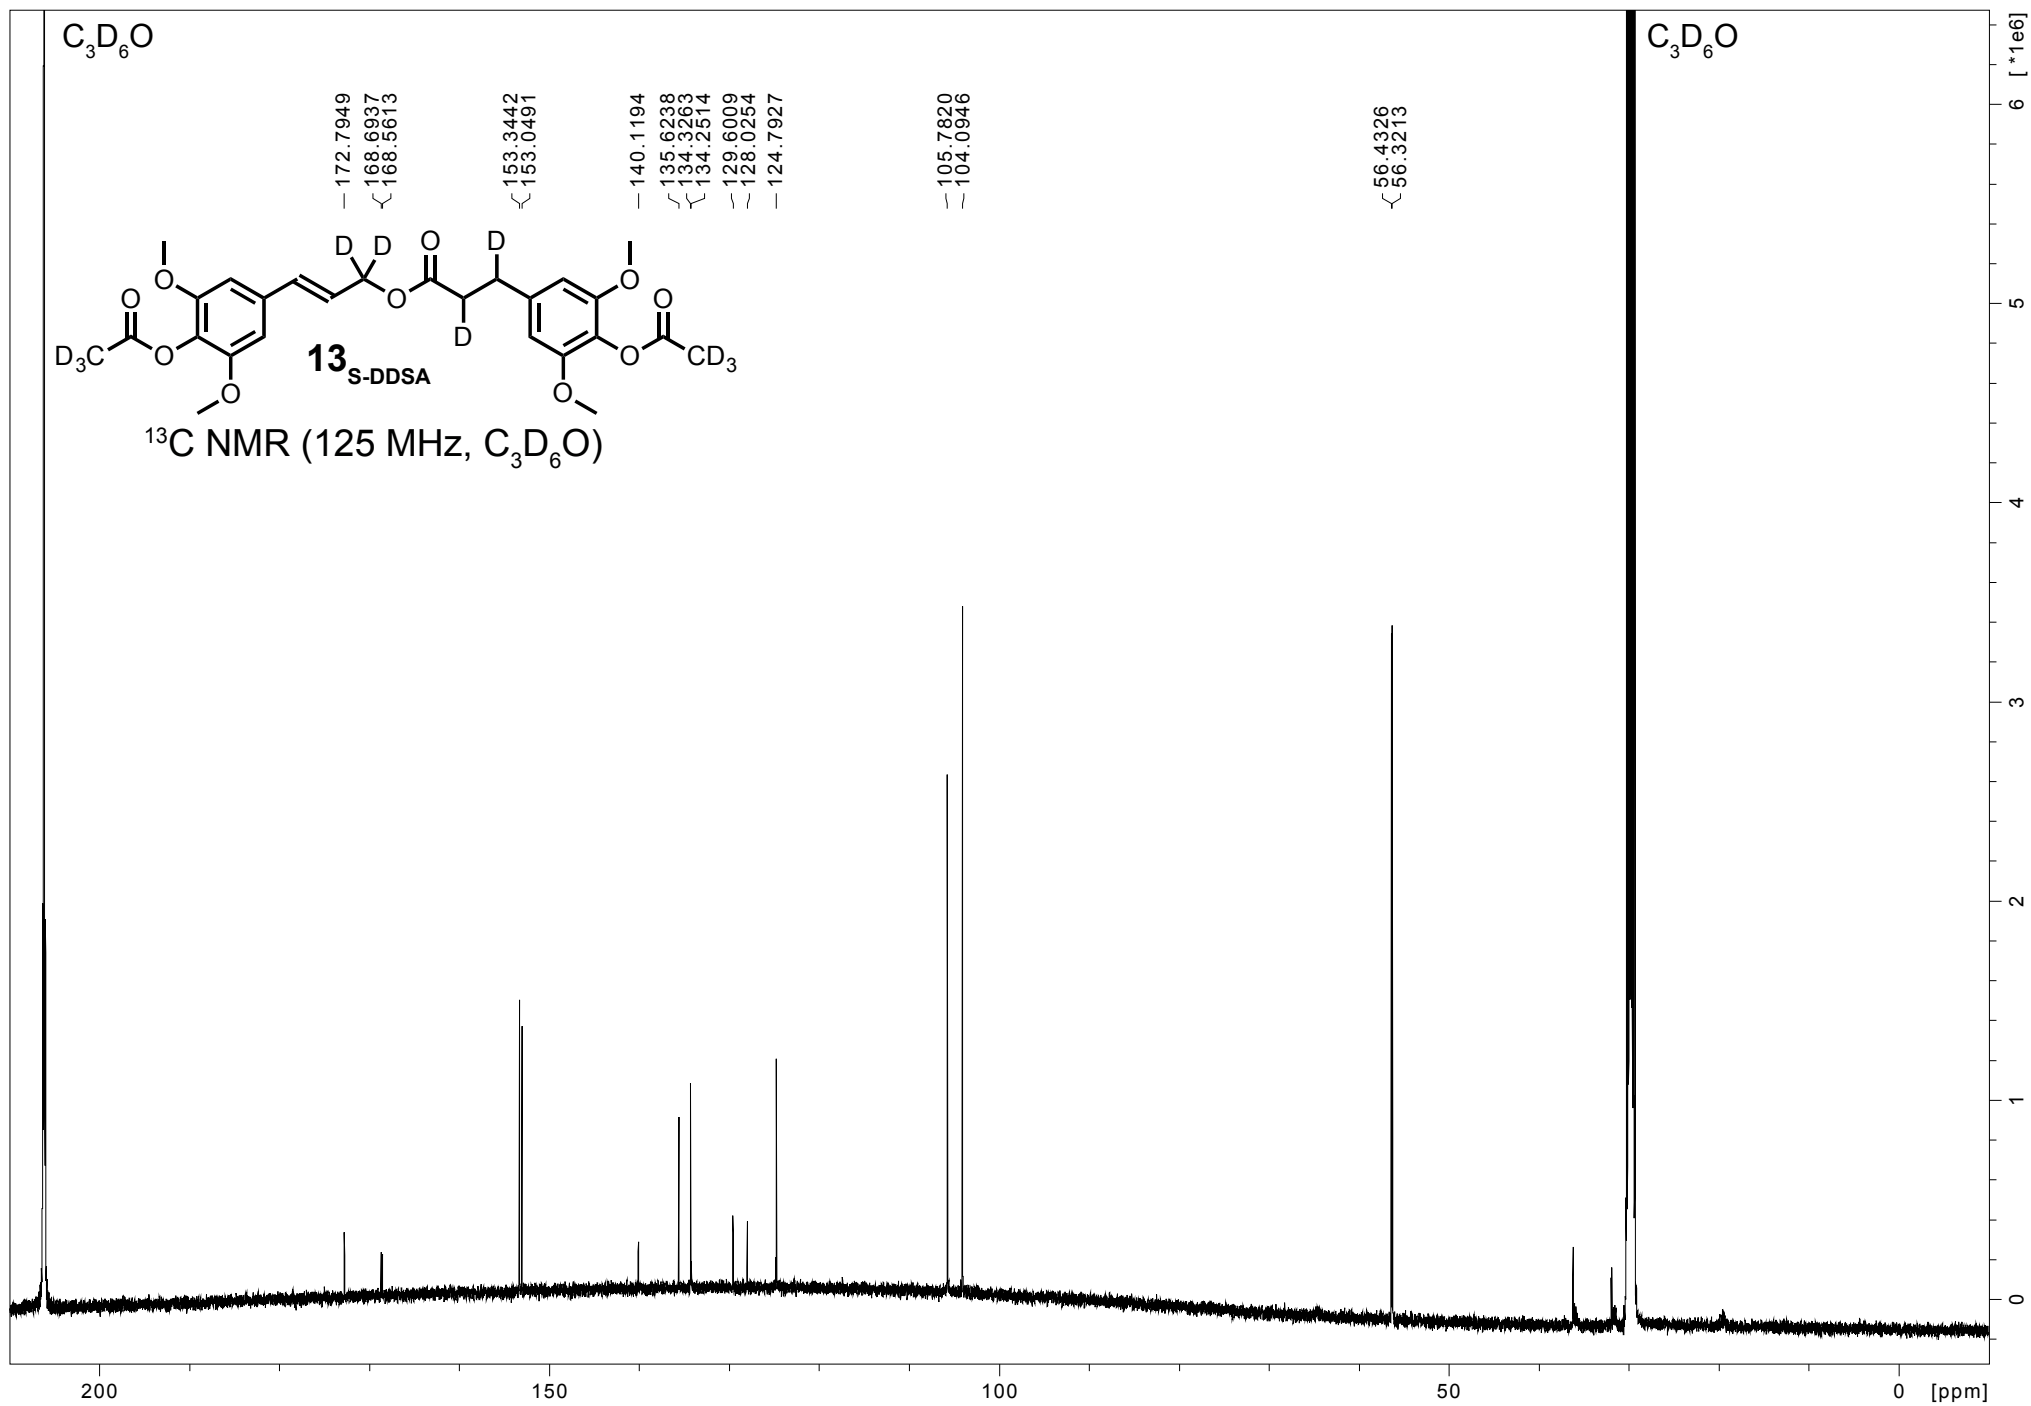

Supplement: CSSC-11-1600-s001.pdf [file CSSC-11-1600-s001.pdf]
